# Supplementary material for: Cellular reprogramming for successful CNS axon regeneration is driven by a temporally changing cast of transcription factors
Source: PubMed Central journal article supplement (PMC6775158; doi:10.1038/s41598-019-50485-6), 2019-10-02
Supplement: 41598_2019_50485_MOESM1_ESM.pdf [file 41598_2019_50485_MOESM1_ESM.pdf]

## Supplementary Information (SI)

### Cellular reprogramming for successful CNS axon regeneration is driven by a temporally changing cast of transcription factors

Sumona P. Dhara<sup>1</sup>, Andrea Rau<sup>2,3</sup>, Michael J. Flister<sup>4</sup>, Nicole M. Recka<sup>1</sup>, Michael D. Laiosa<sup>3</sup>, Paul L. Auer<sup>3</sup>, Ava J. Udvardia<sup>1\*</sup>

<sup>1</sup>Department of Biological Sciences, University of Wisconsin-Milwaukee, Milwaukee, WI 53201, USA

<sup>2</sup>GABI, INRA, AgroParisTech, Universite Paris-Saclay, 78350, Jouy-en-Josas, France

<sup>3</sup>Joseph J Zilber School of Public Health, University of Wisconsin-Milwaukee, Milwaukee, WI 53201, USA

<sup>4</sup>Department of Physiology, Medical College of Wisconsin, Milwaukee, WI 53226, USA

\*To whom correspondence may be addressed: [audvardia@uwm.edu](mailto:audvardia@uwm.edu)

1. Detailed Materials and Methods, SI references
2. Figure S1. Accessible chromatin is mainly located distal to annotated genes.
3. Figure S2. Differentially expressed transcripts that encode transcription factors display regeneration stage-specific temporal patterning
4. Figure S3. Temporal patterning of differentially expressed leucine zipper (bZIP) family transcription factors.
5. Figure S4. Temporal patterning of differentially expressed basic helix-loop-helix (bHLH) family transcription factors.
6. Figure S5. Temporal patterning of differentially expressed 2 cys-2 his zinc finger (C2H2ZF) family transcription factors.
7. Figure S6. Temporal patterning of differentially expressed homeodomain family transcription factors.
8. Figure S7. Injury-induced eGFP expression in retinal ganglion cells can be visualized through the lens of intact animals.
9. Figure S8. FASTA sequence of transgene.
10. Table S1. Transcripts differentially expressed compared to controls (0 dpi) in at least one time point (5% FDR).
11. Table S2. Differentially expressed transcripts (1% FDR) clustered based on temporal expression pattern.
12. Table S3. Ingenuity Pathway Analysis of temporally clustered, differentially expressed genes.
13. Table S4. Differentially accessible sequences with distance to nearest annotated genes and nearest differentially-expressed genes.
14. Table S5. Differentially expressed transcripts that encode transcription factors with and without known motifs.
15. Table S6. Differentially expressed transcripts that encode transcription factors with known motifs.
16. Table S7. Transcription factors that are differentially expressed during regeneration.
17. Table S8. Gene ontology (GO) analysis of putative Jun transcriptional targets.
18. Table S9. Gene ontology analysis of regeneration-associated genes with peak expression during initial axon growth toward the midline.
19. Table S10. RNA sample quality control.
20. Table S11. ATAC-seq library sample quality control
21. Table S12. PCR primers for ATAC-seq libraries based on Nextera indices

## **Detailed Materials and Methods**

### **Zebrafish husbandry and maintenance**

Zebrafish husbandry and all experimental procedures were approved by the *Institutional Animal Care and Use Committee* (IACUC). Zebrafish colonies were maintained as previously described<sup>1</sup>. Adult fish were housed in recirculating rack systems (Aquatic Habitats, Apopka, FL) at 28.5°C on a 14-hour light, 10-hour dark cycle, and fed twice daily with Adult Zebrafish Complete Diet (VWR, West Chester, PA) and once daily with brine shrimp (*Artemia*). A wild type strain (Ekkwill, EK) was used as a negative control for FACS. A transgenic reporter strain constructed on the EK background, Tg (*Tru.gap43:egfp*) mil1, or *fgap43:egfp*<sup>2</sup> was used for all other experiments.

### **Zebrafish optic nerve injury**

Optic nerve crush (ONC) lesions were performed on adult zebrafish, 7-9 months of age, as previously described<sup>3</sup>. Briefly, fish were anesthetized in 0.46 mg/mL tricaine (Argent Chemical Labs, Redmond, WA) in 30% Danieau<sup>4</sup>. The left optic nerve of anesthetized fish was exposed and crushed for 10 seconds using Dumont #5 forceps. The intact retina of an uninjured fish served as the unoperated control (0dpi). Fish were sacrificed 0, 2, 4, 7, or 12 days post injury (dpi) and retinas were dissected. Prior to dissection, left and right eyes of the fish were examined under Nikon eclipse TE2000-U fluorescence microscope for GFP fluorescence as an indicator of regeneration-induced transcriptional activity. GFP was easily detected through the lens in eyes which had previously undergone optic nerve crush (Fig. S7).

### **RNA-seq data generation**

*RNA Isolation.* RNA was extracted and purified from retinas dissected from naïve (0 dpi) and regenerating adult fish at 2, 4, 7, and 12 dpi. Three biological replicates of RNA were obtained for each time point. To prevent RNA degradation, dissected retinas were immediately immersed in an RNA stabilization reagent (RLT buffer of RNeasy Micro Kit, Cat No./ID 74004, Qiagen; Valencia, CA). The retinas were homogenized (sterile Fisherbrand™ RNase-Free Disposable Pellet Pestles Cat No.12-141-368) and filtered (Cat No./ID: 79654, Qiagen). Total RNA was extracted from the homogenized mixture according to manufacturer instructions (RNeasy Micro Kit, Cat No./ID 74004, Qiagen). Total RNA concentration and purity were quantified with NanoDrop ND2000 spectrophotometer (Thermo Scientific) and QuBit fluorometer (Invitrogen), respectively. RNA integrity was quantified using 2100 Bioanalyzer (Agilent High Sensitivity RNA 6000 Pico Reagents Cat No. 5067-1514). For each biological replicate, 3-6 retinas were pooled, cleaned and concentrated (RNA Clean & Concentrator kit, SKU R1013, Zymo Research) to obtain 1 ug total RNA. Total RNA concentration, purity, and integrity of pooled samples was determined as described above. Only samples with RNA integrity numbers (RIN) ranging from 7.7 to 8.2 were used for sequencing (Table S10).

*Library preparation and sequencing.* cDNA libraries (n=3 for 0, 2, 4, 7, and 12 dpi) were generated using Tru-Seq Stranded Total & mRNA Sample Prep Kits, (Illumina 20020595) at University of Wisconsin-Madison Biotechnology Center (UWBC). Each cDNA library was indexed for multiplexing and subsequently sequenced on four lanes of the Illumina HiSeq2000 device, UWBC. Libraries were sequenced at 50 bp, 30–40 million paired-end reads/sample, on Illumina HiSeq 2500 at UWBC, Madison.

*Bioinformatic analysis.* After merging technical replicates of RNA-seq samples across lanes, TrimGalore (v0.4.4, --stringency 3 -q 20) was used in paired-end mode to trim adaptor sequences,

FastQC (v0.11.5) was used to validate sequence quality, and Kallisto<sup>5</sup> (v0.42.4) was used to build an index on a FASTA file consisting of the zebrafish transcriptome (GRCz10 Danio rerio genome assembly, Ensembl release 84 annotation) and the transgene sequence (Fig. S8). Kallisto was subsequently used to quantify transcript abundances using 500 bootstrap samples.

### ATAC-seq data generation

*Cell sorting.* RGCs were collected from dissociated regenerating and control retinas, at each time point using fluorescent activated cell sorting (FACS). Zebrafish were sacrificed, and retinas were dissected and immersed in ice cold PBS with no calcium and magnesium. To one well of a 24-well plate, a single retina (divided into 8 uniform pieces) was added to 500  $\mu$ L Accumax (STEMCELL Technologies). Each retina was chemically digested for 70 mins with agitation on a nutator. Reactions were quenched in heat inactivated fetal calf serum (HI-FCS; Gemini Bio-Products) in DMEM/F12 (Gibco) and lysates were mechanically dissociated by gentle pipetting. Undigested fragments were removed, and the cell suspension was pelleted at 200 g for 3 min. Supernatant was aspirated and the pellet re-suspended in 100  $\mu$ l fresh quenching buffer (DMEM/F12 + 20% FCS). Cell suspensions from multiple retinas at each time point were pooled (0 dpi, 8-10 retina; 2, 4, 7, and 12 dpi, 4-6 retinas). Pooled cell suspension were filtered (Falcon, Cat No. 352235), and sorted for RGCs expressing GFP using a Becton Dickinson FACS Aria™ III sorter fitted with the 100  $\mu$ M nozzle. Negative control cells were used to set gates to separate GFP positive (GFP+) from GFP negative (GFP-) fractions. We collected 50,000 FACS-sorted GFP+ cells per sample that were immediately used for chromatin isolation as described below. Three biologically distinct replicates of pooled cells were collected for each time point.

*Library preparation.* ATAC-seq libraries were prepared using the Tn5 transposase system (Nextera DNA library kit, Illumina, FC-121–1030) as previously described<sup>6</sup>, and purified using DNA Clean & Concentrator kit (SKU: ZD5205, Zymo). The purified samples were assessed for quality as described above (NanoDrop ND2000 spectrophotometer and QuBit fluorometer) and appropriate nucleosomal laddering was determined by 2100 Bioanalyzer (Agilent High Sensitivity DNA Kit, Cat No. 5067-4626) (Table S11). For PCR amplification and qPCR side reactions, PerfeCTa SYBR Green FastMix Quanta (VWR Cat No. 101414-150) was used (Table S12 for PCR Primers).

*Sequencing.* Prior to running the full sequence, Mi-seq was used to estimate sequencing depth. One sample was below the cut-off criteria and therefore omitted. The remaining fourteen samples were indexed for multiplexing and subsequently sequenced on four lanes of the Illumina HiSeq2000, UWBC. Data were sequenced at 50 bp to obtain approximately 25 million paired-end reads/samples.

*Bioinformatic analysis.* After merging technical replicates of ATAC-seq samples across lanes, TrimGalore (v0.4.4, --stringency 3 -q 20) was used in paired-end mode to trim adaptor sequences and FastQC (v0.11.5) was used to validate sequence quality. BWA-MEM<sup>7</sup> (v0.7.9a-r786) was used to align reads to the zebrafish genome (GRCz10) and transgene sequence. Duplicate and multiple mapped reads were removed using samtools (v1.6)<sup>8</sup>. After concatenating aligned reads across all replicates and time points, MACS2<sup>9</sup> (v2.1.1.20160309, --no-model -g 1.37e+09 --keep-dup all --call-summits) was used in paired-end mode without shifting model to call peaks from aligned reads, and summits of deconvoluted subpeaks were identified. Only peaks with a p-value < 10<sup>-10</sup> were retained for subsequent analyses. For each remaining subpeak summit, a 500bp “peaklet” interval was defined using [summit - 250bp, summit + 249bp] using GenomicRanges (v1.30.3)<sup>10</sup>. We refer to these peaklets as consensus regions of accessible chromatin. Open

chromatin in each replicate of each time point was then quantified using DiffBind (v2.6.6, default parameters) by counting the number of overlapping reads for each retained peaklet.

### Statistical analysis of RNA-seq and ATAC-seq data

Following pseudoalignment and quantification of transcripts, differentially expressed transcripts were identified using Sleuth (v0.29.0)<sup>11</sup>. Specifically, a full model, including a factor for each time point after injury (2, 4, 7, 12 dpi), was estimated for each transcript, and a Wald test was calculated for each coefficient to identify significant differences with the initial time point (0dpi). After controlling the false discovery rate (FDR) at 5% within each comparison using the Benjamini-Hochberg<sup>12</sup> approach, differentially expressed transcripts with respect to the baseline were identified for each post-injury time point. Beta values from the model were used as a biased estimator of log-fold change. Expression heatmaps (based on Z-scores calculated using either log fold-changes or log transcripts per million [TPM] estimates) were produced using ComplexHeatmap<sup>13</sup> (v1.17.1), where transcript clusters were identified using the K-means algorithm, and hierarchical clustering (Euclidean distance, complete linkage) was used to cluster rows. The Ingenuity Pathway Analysis tool (Qiagen, Redwood City, CA, USA) was used to analyze enrichment of molecular and functional gene networks within the differentially expressed gene sets (FDR<0.05) at each time point after injury (2, 4, 7, 12 dpi) compared with the initial time point (0dpi).

After quantifying peaklet accessibility, DESeq2 (v1.18.1)<sup>14</sup> was used to identify differentially accessible peaklets in an analogous manner to the RNA-seq analysis described above. As before, a full generalized linear model including a factor for each post-injury time point was estimated for each peaklet, and a Wald test was calculated for each coefficient to determine significant differences in accessibility compared to the baseline. Peaklets with FDR-controlled p-values < 0.05 in one of the four comparisons were considered to be differentially accessible. ChIPpeakAnno (v3.12.7)<sup>14,15</sup>, the TxDb.Drerio.UCSC.danRer10.refGene UCSC annotation package (v3.4.2), and AnnotationHub (v2.10.1) were used to annotate peaklets with genes. Specifically, non-exonic (i.e., not overlapping exons by more than 50bp) peaklets overlapping a transcription start site (TSS) or within 1kb of a TSS were considered to represent proximal peaks, whereas those greater than 1kb but less than 100kb of a TSS were considered to represent distal peaks. All statistical analyses were performed in R (v3.4.3). Integrative Genome Viewer (IGV) was used to visualize RNA-seq and ATAC-seq alignments<sup>16</sup>.

We used motif analysis to determine potential binding sites of our differentially expressed transcription factors within regions of accessible chromatin identified by ATAC-seq. Motif enrichment and discovery was carried out using various applications within the MEME Suite of motif-based sequence analysis tools (version 5.0.4)<sup>17</sup>. We compiled a user-supplied file for motifs corresponding to the transcription factors we identified as differentially expressed (Fig. 2), for which there were existing motifs in JASPAR or CIS-BP databases (Table S7). Motifs were formatted to MEME Motif format as specified with the MEME suite applications (meme-suite.org). The Analysis of Motif Enrichment (AME) tool<sup>18</sup> was used to determine motif enrichment in accessible chromatin surrounding genes in each temporal cluster (Fig. 1C). FASTA files of 500 bp peaklet sequences located proximal ( $\leq 1$  kb from transcription start site) or distal (within  $> 1$  kb, but  $\leq 100$  kb, from transcription start site) from differentially expressed genes were used in conjunction with our user-supplied motif file. Analysis was run using average odds score sequence scoring and Fisher's exact test for motif enrichment. The AME tool was also used to identify motifs within the differentially accessible chromatin regions surrounding the *jun* gene (Fig. 4), using both our user supplied motif file and the built in motif file for Eukaryotic DNA, Vertebrates (*in vivo* and *in silico*). The Find Individual Motif Occurrences (FIMO) tool<sup>19</sup> was used to scan for

additional binding sites with the putative *jun* promoter and enhancers sequences using our user-supplied motif list. AME and FIMO analysis were both run using default parameter settings.

### **References cited in Detailed Materials and Methods**

- 1 Westerfield, M. *The Zebrafish Book: A Guide for the Laboratory Use of Zebrafish (Danio rerio)*. (1997).
- 2 Udvardia, A. J. 3.6 kb Genomic sequence from Takifugu capable of promoting axon growth-associated gene expression in developing and regenerating zebrafish neurons. *Gene Expr Patterns* **8**, 382-388, doi:10.1016/j.gep.2008.05.002 (2008).
- 3 Bormann, P., Zumsteg, V. M., Roth, L. W. A. & Reinhard, E. Target contact regulates GAP-43 and alpha-tubulin mRNA levels in regenerating retinal ganglion cells. *J Neurosci Res* **52**, 405-419, doi:Doi 10.1002/(Sici)1097-4547(19980515)52:4<405::Aid-Jnr4>3.0.Co;2-D (1998).
- 4 Manoli, M. & Driever, W. Fluorescence-activated cell sorting (FACS) of fluorescently tagged cells from zebrafish larvae for RNA isolation. *Cold Spring Harb Protoc* **2012**, doi:10.1101/pdb.prot069633 (2012).
- 5 Bray, N. L., Pimentel, H., Melsted, P. & Pachter, L. Near-optimal probabilistic RNA-seq quantification. *Nature Biotechnology* **34**, 525-527, doi:10.1038/nbt.3519 (2016).
- 6 Buenrostro, J. D., Wu, B., Chang, H. Y. & Greenleaf, W. J. ATAC-seq: A Method for Assaying Chromatin Accessibility Genome-Wide. *Curr Protoc Mol Biol* **109**, 21 29 21-29, doi:10.1002/0471142727.mb2129s109 (2015).
- 7 Li, H. & Durbin, R. Fast and accurate short read alignment with Burrows-Wheeler transform. *Bioinformatics* **25**, 1754-1760, doi:10.1093/bioinformatics/btp324 (2009).
- 8 Li, H., Handsaker, B., Wysoker, A., Fennell, T., Ruan, J., Homer, N., Marth, G., Abecasis, G., Durbin, R. & Proc, G. P. D. The Sequence Alignment/Map format and SAMtools. *Bioinformatics* **25**, 2078-2079, doi:10.1093/bioinformatics/btp352 (2009).
- 9 Zhang, Y., Liu, T., Meyer, C. A., Eeckhoute, J., Johnson, D. S., Bernstein, B. E., Nussbaum, C., Myers, R. M., Brown, M., Li, W. & Liu, X. S. Model-based Analysis of ChIP-Seq (MACS). *Genome Biology* **9**, doi:ARTN R137; 10.1186/gb-2008-9-9-r137 (2008).
- 10 Lawrence, M., Huber, W., Pages, H., Aboyoun, P., Carlson, M., Gentleman, R., Morgan, M. T. & Carey, V. J. Software for Computing and Annotating Genomic Ranges. *Plos Comput Biol* **9**, doi:ARTN e1003118; 10.1371/journal.pcbi.1003118 (2013).
- 11 Pimentel, H., Bray, N. L., Puente, S., Melsted, P. & Pachter, L. Differential analysis of RNA-seq incorporating quantification uncertainty. *Nat Methods* **14**, 687-+, doi:10.1038/nmeth.4324 (2017).
- 12 Benjamini, Y. & Hochberg, Y. Controlling the False Discovery Rate - a Practical and Powerful Approach to Multiple Testing. *J R Stat Soc B* **57**, 289-300 (1995).

- 13 Gu, Z., Eils, R. & Schlesner, M. Complex heatmaps reveal patterns and correlations in multidimensional genomic data. *Bioinformatics* **32**, 2847-2849, doi:10.1093/bioinformatics/btw313 (2016).
- 14 Love, M. I., Huber, W. & Anders, S. Moderated estimation of fold change and dispersion for RNA-seq data with DESeq2. *Genome Biol* **15**, 550, doi:10.1186/s13059-014-0550-8 (2014).
- 15 Zhu, L. J., Gazin, C., Lawson, N. D., Pages, H., Lin, S. M., Lapointe, D. S. & Green, M. R. ChIPpeakAnno: a Bioconductor package to annotate ChIP-seq and ChIP-chip data. *BMC Bioinformatics* **11**, 237, doi:10.1186/1471-2105-11-237 (2010).
- 16 Robinson, J. T., Thorvaldsdottir, H., Winckler, W., Guttman, M., Lander, E. S., Getz, G. & Mesirov, J. P. Integrative genomics viewer. *Nat Biotechnol* **29**, 24-26, doi:10.1038/nbt.1754 (2011).
- 17 Bailey, T. L., Johnson, J., Grant, C. E. & Noble, W. S. The MEME Suite. *Nucleic Acids Res* **43**, W39-49, doi:10.1093/nar/gkv416 (2015).
- 18 McLeay, R. C. & Bailey, T. L. Motif Enrichment Analysis: a unified framework and an evaluation on ChIP data. *BMC Bioinformatics* **11**, 165, doi:10.1186/1471-2105-11-165 (2010).
- 19 Grant, C. E., Bailey, T. L. & Noble, W. S. FIMO: scanning for occurrences of a given motif. *Bioinformatics* **27**, 1017-1018, doi:10.1093/bioinformatics/btr064 (2011).

## Supplementary Figures

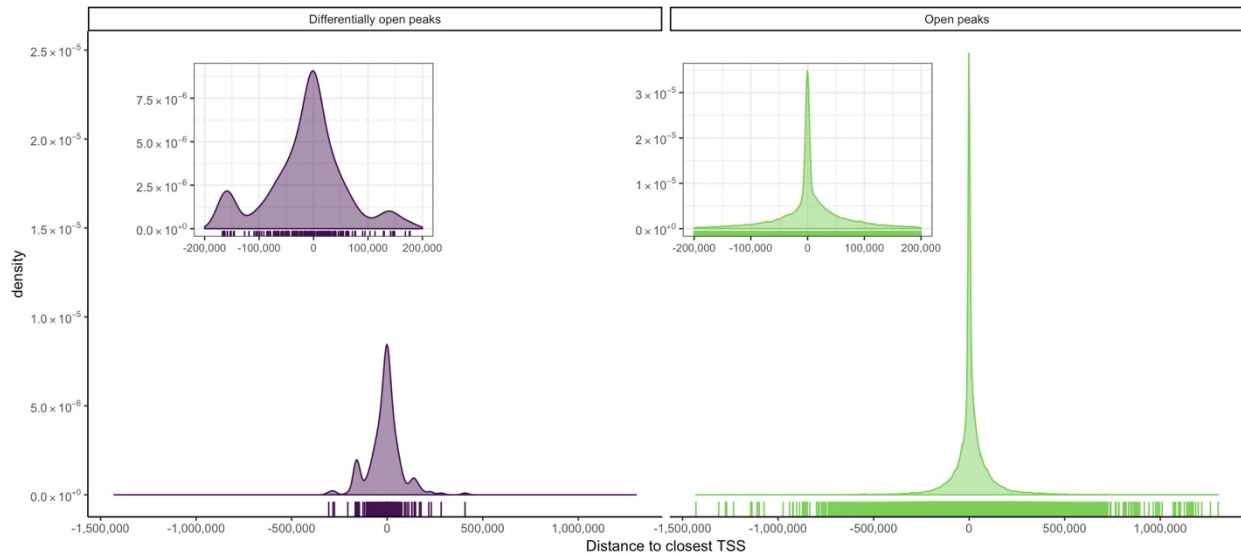

**Figure S1. Accessible chromatin is mainly located distal to annotated genes.** Distribution of accessible chromatin peaklets was plotted to determine the distance of the peaklet center to the nearest transcriptional start site (TSS). There were 42,198 high confidence open peaklets (green, right) identified ( $p < 10^{-10}$ ). Accessibility of 233 peaklets changed in at least one time point compared to controls were considered differentially open (purple, left). Insets show magnified view of distribution of sequences within 200,000 kb of the TSS. There was a mostly equal distribution of sequences located upstream and downstream of the TSS, 20% found within 1 kb of the TSS.

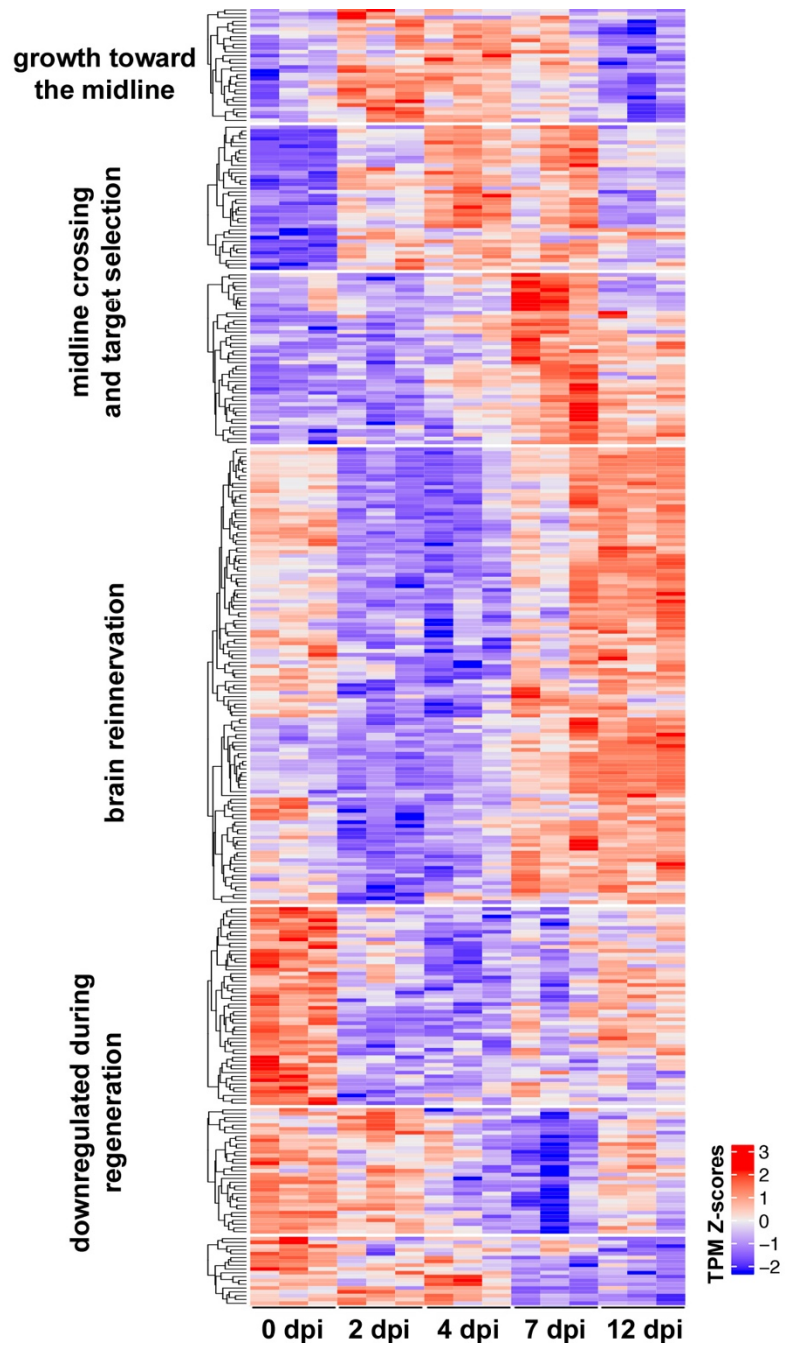

**Figure S2. Differentially expressed transcripts that encode transcription factors display regeneration stage-specific temporal patterning.** The expression heatmap of 339 differentially expressed transcripts represents 265 unique transcription factor (TF) genes. Unlike in Fig. 2C, this heatmap includes TFs with and without known DNA binding motifs.



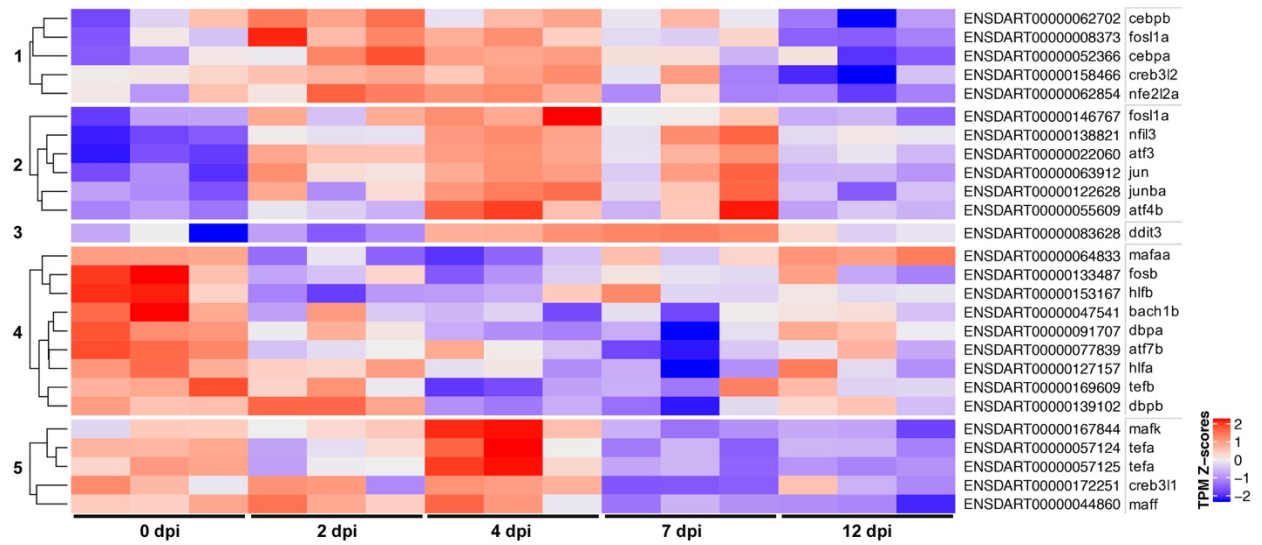

**Figure S3. Temporal patterning of differentially expressed leucine zipper (bZIP) family transcription factors.**

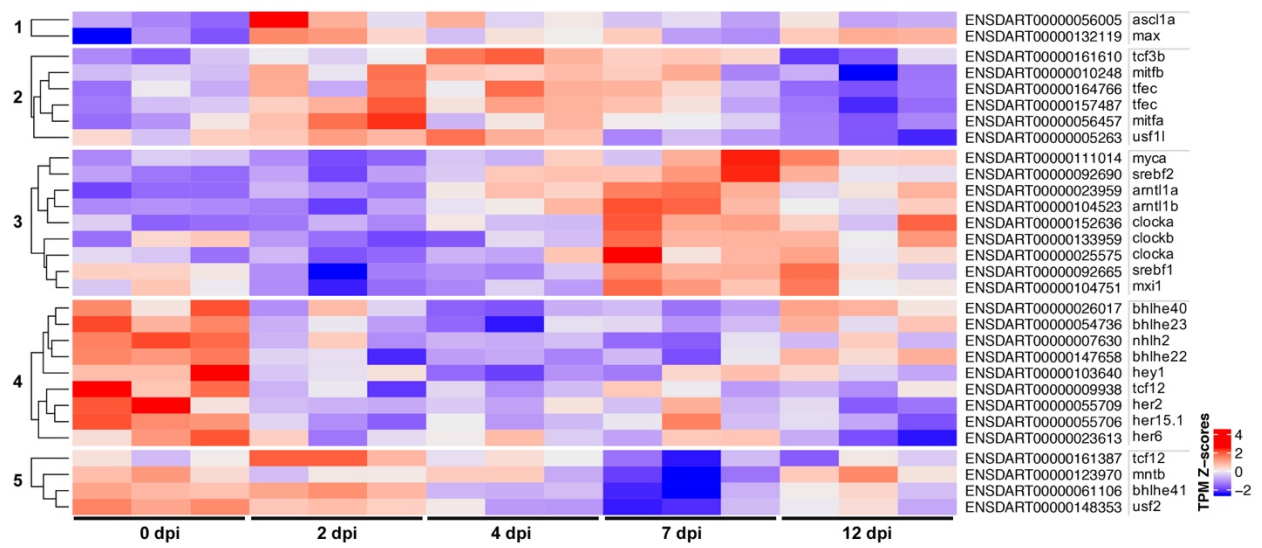

**Figure S4. Temporal patterning of differentially expressed basic helix-loop-helix (bHLH) family transcription factors.**

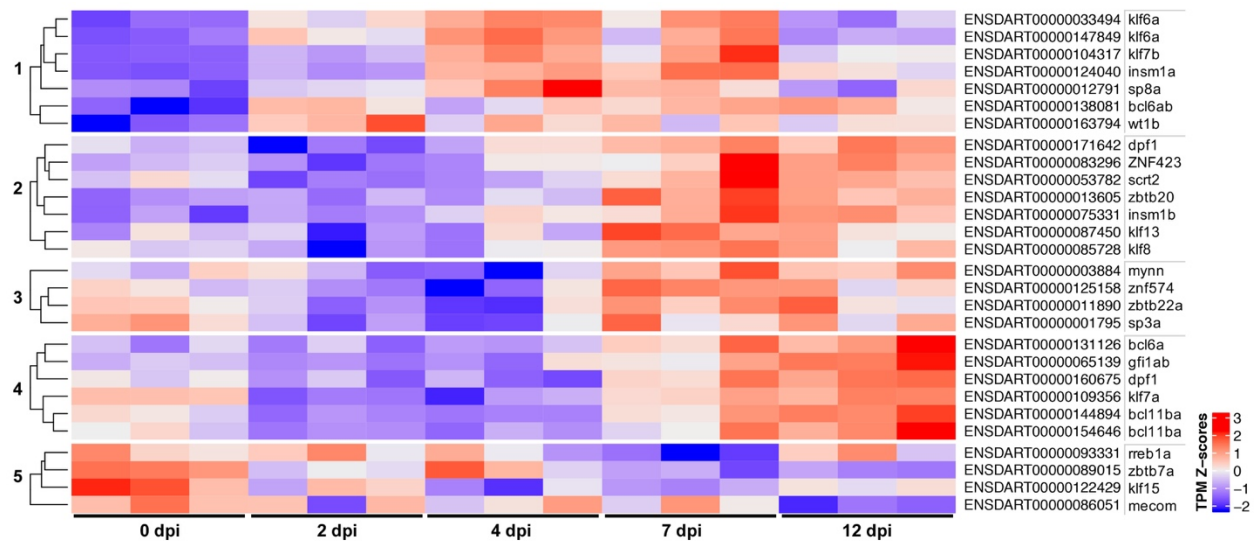

**Figure S5. Temporal patterning of differentially expressed 2 cys-2 his zinc finger (C2H2ZF) family transcription factors.**

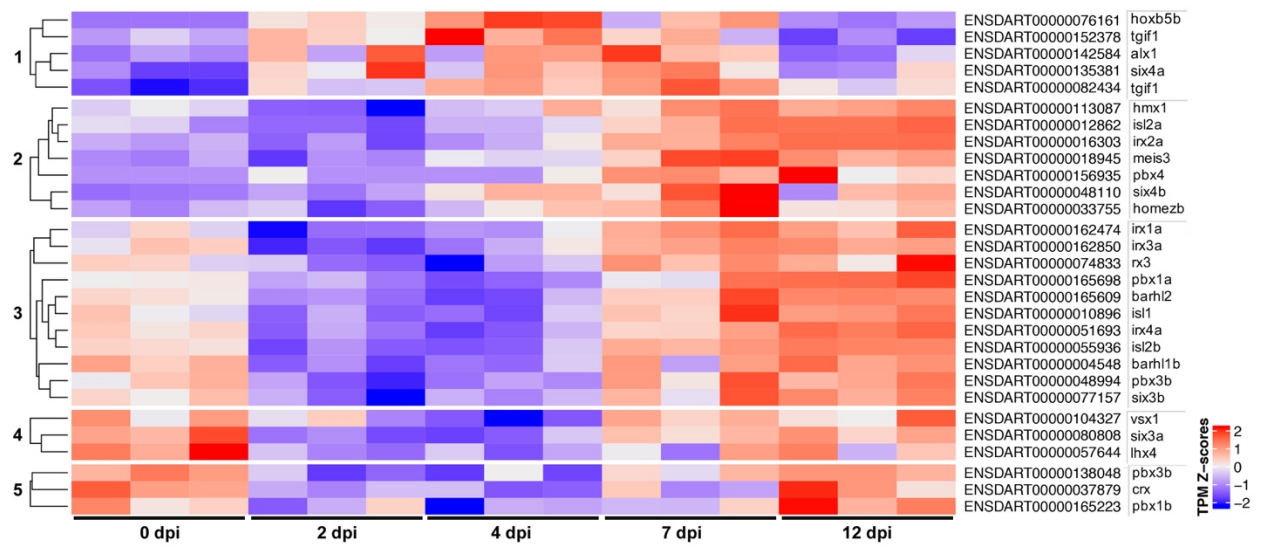

**Figure S6. Temporal patterning of differentially expressed homeodomain family transcription factors.**



ggc gat gcc acc tac gg ca ag ctg acc ctg a ag tt cat ctg cacc acc gg ca ag ctg ccc gtg ccc tt gg ccc acc ctg t gacc ac  
cct gac ctac gg cgt g cag t g ctt cag cc gct acc cc gacc ac at ga ag cag cag cag act ttt ca ag tcc g ccat gcc cga ag gcta  
cgt cc ag g ag cgc acc at ctt ttt ca ag g ac gac gg ca act aca ag acc cgc c g ag g t ga ag tt c g ag g g c g ac acc ct ggt g  
a acc g cat c g ag ct ga ag g g cat c g act t ca ag g ag g ac gg ca ac at cct g g g g caca ag ct g g ag t aca act aca ac ag cc ac  
aac gt ct at at cat gg cc gaca ag caga aga ac gg cat ca ag g t ga act t ca ag at cc g cca ca ac at c g ag g ac gg cag cgt g  
cag ct c g c g acc act acc ag caga ac acc ccc at c g g c g ac g g ccc g t g t g t g c c c g aca acc act acc t g ag c acc c ag t  
cc g c c t g ag caa ag acc cca ac g a g a g c g c g at ca cat gg t c t g t g g ag t t c g t g acc c g c c g g g at c act t c t g g c at g  
g ac g ag ct g t aca ag ta ag g at cc act ag t g at g c ag at c c c c g g at c t t t g t ga ag ga ac ct t act t c t g t g t g t g a ca ta at t g  
g aca a act acc t aca g ag at taa ag ct a ag g t a a t a t a a a t t t t a a g t g t a a t g t g t a a a c t a c t g a t t c t a a t t g t t g  
t g t a t t t a g a t t c c a a c c t a t g g a a c t g a t g a a t g g g a g c a g t g g t g g a a t g c c t t a a t g a g g a a a c c t g t t t g t c a g a a g a  
a a t g c c a t c t a g t g a t g a t g a g g c t a c t g t g a c t c t c a a c a t t c t a c t c c t c c a a a a a g a a g a g a a a g g t a g a a g a c c c c a a g g  
a c t t t c c t t c a g a a t t g c t a a g t t t t t g a g t c a t g t g t t t a g t a a t a g a a c t t g c t t g c t t t g c t a t t a c a c c a a a a g g a a a  
a a g t g c a c t g c t a t a c a a g a a a a t t a t g g a a a a a t a t t c t g t a a c t t t a t a a g t a g g c a t a a c a g t t a t a t c a t a c a t a c t g t t  
t t t t c t a c c a c a c a g g c a t a g a g t g t c t g t a t a a t a a c t a t g c t c a a a a a t t g t g t a c c t t a g c t t t t a a t t g t a a a g g g g t t  
a a t a a g g a a t a t t t g a t g t a t a g t g c c t t g a c t a g a g a t c a t a a t c a g c c a t a c c a c a t t t g t a g a g g t t t a c t t g c t t a a a a a c  
c t c c c a c a c c t c c c c t g a a c c t g a a c a t a a a a t g a a t g c a a t t g t t g t t a a c t t g t t a t t g c a g c t t a t a a t g g t t a c a a a t a  
a a g c a a t a g c a t c a c a a a t t c a c a a a t a a a g c a t t t t t c a c t g c a t t c t a g t t g t g t t t g t c c a a a c t c a t c a a t g t a t c t t a c a  
t g t c t g g a t c t g c a t a t t c t a t a g t g t c a c c t a a a t c t g c

**Fig. S7. Sequence of GAP43-GFP transgene.** Transgene sequence in FATSFA format. GAP43-GFP fusion protein coding sequences highlighted in yellow.

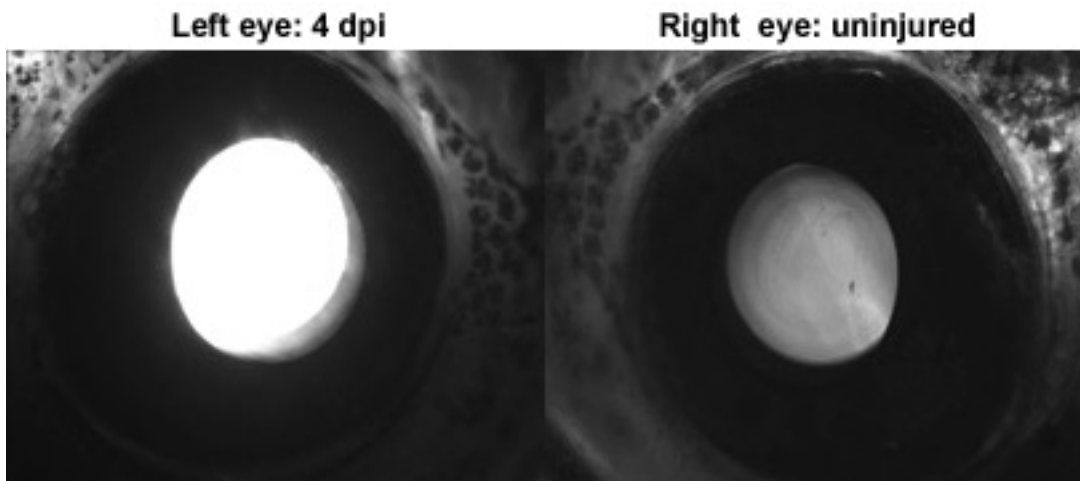

**Figure S8. Injury-induced eGFP expression in retinal ganglion cells can be visualized through the lens of intact animals.** Optic nerve injury can be validated based GFP expression, which is easily visualized through the lens. Example of injury and naïve eyes from the same fish 4 dpi.

**Table S1. Transcripts differentially expressed compared to controls (0 dpi) in at least one time point (5% FDR).**

| Ensembl transcript ID | zebrafish gene symbol | LFC: 2dpi-0dpi | LFC: 4dpi-0dpi | LFC: 7dpi-0dpi | LFC: 12dpi-0dpi |
|-----------------------|-----------------------|----------------|----------------|----------------|-----------------|
| ENSDART00000000069    | slc9a3r1a             | -0.019828621   | -0.165096913   | -0.579587833   | -0.318451026    |
| ENSDART00000000192    | ptpn4b                | -0.253123991   | -0.355280061   | -0.416236309   | -0.192007       |
| ENSDART00000000280    | stat1b                | -0.005066017   | 0.035352481    | 0.819259146    | 0.412054224     |
| ENSDART00000000486    | cntn2                 | 0.015280519    | 0.733067848    | 1.819345027    | 1.713832915     |
| ENSDART00000000678    | opn1mw4               | -0.668549106   | -0.384195773   | -0.152811605   | -0.428104315    |
| ENSDART00000000744    | syp12b                | 0.279822836    | 0.157132955    | 0.007001172    | -0.094022715    |
| ENSDART00000000804    | slc8a1b               | -0.216070414   | -0.730017061   | -0.564883211   | -0.309532287    |
| ENSDART00000000876    | nr4a1                 | -2.262372442   | -2.399082592   | -2.145415905   | -1.543723254    |
| ENSDART00000001313    | rimbp2                | -0.29201819    | -0.480722019   | -0.187717263   | 0.029819479     |
| ENSDART00000001444    | g2e3                  | 0.958887749    | 1.066626105    | 0.575974767    | 0.288448068     |
| ENSDART00000001678    | adam8a                | 1.934717518    | 1.802449426    | 1.368408045    | -0.21633234     |
| ENSDART00000001795    | sp3a                  | -0.269877105   | -0.305437708   | -0.047306155   | -0.033496274    |
| ENSDART00000001805    | csmd2                 | -0.646636229   | -0.876947398   | -0.300952212   | -0.072675683    |
| ENSDART00000001861    | slc6a22.1             | 0.506403045    | 0.610928969    | 0.211334169    | -0.287297819    |
| ENSDART00000001907    | slc16a3               | -0.228617593   | -0.852511558   | -0.452127784   | -0.215137636    |
| ENSDART00000002027    | gulp1a                | -0.229497305   | -0.154479555   | -0.273130036   | -0.186901702    |
| ENSDART00000002029    | fkbp8                 | -0.081020923   | -0.107047698   | -0.329759128   | -0.094897987    |
| ENSDART00000002186    | uck2a                 | 0.69693934     | 0.733529046    | 0.658757388    | 0.439621207     |
| ENSDART00000002250    | hs6st2                | 0.156001692    | 0.361544481    | 0.514379395    | 0.208727247     |
| ENSDART00000002309    | mafba                 | 0.316562739    | 0.132730939    | 0.096554959    | 0.286187946     |
| ENSDART00000002393    | rundc3aa              | -0.355283185   | 0.971542583    | 1.209230568    | 0.944629469     |
| ENSDART00000002453    | acsl4b                | 0.682559347    | 0.484852434    | 0.056581739    | -0.183902113    |
| ENSDART00000002469    | hspa4b                | 0.156626095    | 0.21868197     | 0.285696466    | 0.103348348     |
| ENSDART00000002501    | ip6k2a                | -0.189409699   | -0.526120261   | -0.315517036   | -0.114843314    |
| ENSDART00000002556    | mrto4                 | 0.589078781    | 0.447556222    | 0.419365915    | 0.058126759     |
| ENSDART00000002595    | rpl21                 | 0.36985839     | 0.3662658      | 0.201825483    | -0.004056179    |
| ENSDART00000002641    | kif26aa               | 0.255726279    | 0.47696992     | 0.58781469     | 0.342072456     |
| ENSDART00000002684    | ddx26b                | -0.289572133   | -0.160183273   | -0.164172394   | -0.052122897    |
| ENSDART00000002691    | tspan7b               | -0.507607245   | -0.383440036   | -0.192864148   | 0.037733122     |
| ENSDART00000002741    | itprip                | 0.724094373    | 0.694272578    | 0.397322653    | -0.062298334    |
| ENSDART00000002908    | olfm1a                | -0.612571688   | -0.410284408   | -0.115653646   | 0.220963821     |
| ENSDART00000002932    | marcksb               | 1.016829958    | 1.677411962    | 1.758104803    | 1.229873931     |
| ENSDART00000002945    | NPC2 (1 of many)      | 3.182180208    | 2.136779184    | 1.408480393    | 0.09501531      |
| ENSDART00000002961    | rcor2                 | -0.353333584   | 0.726682254    | 0.762799057    | 0.664353552     |
| ENSDART00000003001    | rpl23a                | 0.412203534    | 0.396855245    | 0.244635942    | -0.052563059    |
| ENSDART00000003008    | gad1b                 | -0.375298425   | -0.380219055   | -0.456528647   | -0.347996362    |
| ENSDART00000003042    | mdkb                  | -0.457982371   | -0.488604373   | -0.629508021   | -0.485178616    |
| ENSDART00000003066    | cyth1a                | 0.591135613    | 0.827117646    | 0.654961234    | 0.137500638     |
| ENSDART00000003076    | usp28                 | 1.676441425    | 4.659547988    | 4.384020448    | 3.839785573     |
| ENSDART00000003170    | mid1ip1l              | -0.359873821   | -0.329776238   | -0.564188118   | -0.321447922    |
| ENSDART00000003193    | gpr183a               | 0.785395164    | 0.62770375     | 0.383370825    | -0.244463733    |
| ENSDART00000003248    | nek2                  | 0.657099139    | 0.725246979    | 0.481556646    | 0.191253132     |
| ENSDART00000003278    | tacr3l                | -0.098648497   | -0.084970679   | -0.345458842   | -0.125397678    |
| ENSDART00000003293    | mid2                  | -0.366666589   | -0.252968542   | -0.080242025   | -0.101833487    |
| ENSDART00000003296    | sars                  | 0.182171112    | 0.390636242    | 0.505424837    | 0.283972917     |
| ENSDART00000003303    | rnf13                 | 4.71068286     | 4.417862481    | 3.703911232    | 4.352869871     |
| ENSDART00000003314    | nusap1                | 0.825744448    | 0.908244509    | 0.647266522    | 0.3629471       |
| ENSDART00000003335    | snx12                 | -0.102084433   | -0.181980514   | -0.47779818    | -0.16493026     |



|                    |           |              |              |              |              |
|--------------------|-----------|--------------|--------------|--------------|--------------|
| ENSDART00000003346 | pdcd2l    | -0.007609279 | -0.153705238 | -0.388070334 | -0.362770652 |
| ENSDART00000003465 | gipc2     | -0.142551263 | -0.216969239 | -0.344609382 | -0.269869981 |
| ENSDART00000003475 | ppef1     | -3.70073529  | -0.21405279  | -0.165262449 | -0.400509129 |
| ENSDART00000003517 | trmt61a   | 0.394655787  | 0.457245144  | 0.184403345  | 0.19719299   |
| ENSDART00000003548 | znf385a   | -0.544762633 | -0.635515273 | -0.316063497 | -0.128464507 |
| ENSDART00000003550 | nmnat2    | -0.104759046 | 0.216048796  | 0.282752276  | 0.230034653  |
| ENSDART00000003612 |           | -0.145765054 | -0.499207076 | -0.35686816  | -0.607333409 |
| ENSDART00000003648 | wdr3      | 0.482670527  | 0.422648714  | 0.349517488  | 0.089241222  |
| ENSDART00000003690 | acana     | 0.770985542  | 0.283939017  | 0.058793221  | 0.105884754  |
| ENSDART00000003736 | anos1b    | -0.470963792 | -0.442368787 | -0.444507654 | -0.318716779 |
| ENSDART00000003745 | vim       | 0.110317427  | 0.81438402   | 0.975636783  | 0.646819018  |
| ENSDART00000003752 | cct3      | 0.348496547  | 0.407130663  | 0.410390239  | 0.168454536  |
| ENSDART00000003790 | pwp1      | 0.32756693   | 0.411455433  | 0.339342319  | 0.085530698  |
| ENSDART00000003825 | cplx2l    | -1.121107993 | -0.523528158 | 0.430342309  | 0.533514858  |
| ENSDART00000003891 | jupa      | 0.359241944  | 1.297843964  | 1.552619484  | 0.724987275  |
| ENSDART00000003913 | ifih1     | 0.480118819  | 0.196152277  | 1.199192931  | 0.158891974  |
| ENSDART00000003939 | syng1a    | 0.053450312  | -0.149997984 | -0.371497084 | -0.066149387 |
| ENSDART00000003947 | flot2a    | 0.262220916  | 0.241361404  | 0.622111227  | 0.24129723   |
| ENSDART00000003998 | ewsr1b    | 0.136063726  | 0.084077199  | 0.439371598  | 0.241694854  |
| ENSDART00000004034 | hpc       | -0.538662149 | -0.391929378 | -0.242660916 | -0.195867715 |
| ENSDART00000004043 | enpp4     | -0.15333394  | -0.216742775 | -0.388554121 | -0.343087399 |
| ENSDART00000004065 | zgc:91909 | 0.594004329  | 0.47164071   | 0.350756766  | 0.105236702  |
| ENSDART00000004075 | uqcc2     | -0.167833305 | -0.222493804 | -0.340331706 | -0.224913678 |
| ENSDART00000004109 | gng3      | -0.129761127 | 0.224238645  | 0.384018688  | 0.329285885  |
| ENSDART00000004200 | sarm1     | 0.137263218  | 0.386089559  | 0.382312262  | 0.28972731   |
| ENSDART00000004238 | rpl7a     | 0.295188189  | 0.336446742  | 0.303958011  | 0.013338352  |
| ENSDART00000004241 | inhbaa    | 0.208890493  | -0.32024378  | -0.370155553 | -0.220482209 |
| ENSDART00000004392 | fkbp9     | 0.758370209  | 0.583896419  | 0.427971915  | -0.289954899 |
| ENSDART00000004416 | lrp1ba    | -0.680071532 | -0.933155051 | -0.315048731 | 0.19015716   |
| ENSDART00000004420 | rab4a     | -0.104588348 | -0.223085036 | -0.330744686 | -0.154422823 |
| ENSDART00000004423 | iars      | 0.363891152  | 0.394414274  | 0.599518689  | 0.155539422  |
| ENSDART00000004474 | mapre1b   | 0.531914947  | 0.849936108  | 0.970422656  | 0.515027849  |
| ENSDART00000004521 | arih2     | -0.124662771 | -0.251962223 | -0.001375347 | 0.051084605  |
| ENSDART00000004548 | barhl1b   | -2.472825095 | -1.41656094  | -0.268019579 | 0.230183047  |
| ENSDART00000004550 | rnf145a   | -0.045034762 | -0.327456151 | -0.349649694 | 0.141940758  |
| ENSDART00000004588 | asic1a    | 0.159371955  | 0.158599541  | 0.248620425  | 0.288433907  |
| ENSDART00000004601 | laptm4a   | -0.20461666  | -0.134693111 | -0.288435619 | -0.251769605 |
| ENSDART00000004622 | sf3b4     | 0.222493415  | 0.286225027  | 0.527062646  | 0.243398323  |
| ENSDART00000004626 | sec62     | -0.335700502 | -0.25907023  | -0.14783183  | -0.155829549 |
| ENSDART00000004656 | GCA       | 0.318444393  | 0.283040087  | 0.060810751  | -0.123164086 |
| ENSDART00000004664 | tram1     | 0.410276471  | 0.318086482  | 0.103470746  | -0.163408872 |
| ENSDART00000004717 | igf1      | -0.688444818 | -0.421253017 | -0.11318285  | 0.107184312  |
| ENSDART00000004740 | rab34b    | 1.81284078   | 2.340901968  | 1.779523446  | 1.639598632  |
| ENSDART00000004780 | man2b1    | 0.352578138  | 0.195228445  | 0.062298599  | -0.189062834 |
| ENSDART00000004903 | rdh10b    | -0.385872948 | -0.19159484  | -0.565090954 | -0.486336464 |
| ENSDART00000005053 | slc12a4   | -0.135764977 | -0.039802706 | -0.399029267 | -0.999098872 |
| ENSDART00000005086 | atp1a1b   | -0.434454878 | -0.290341007 | -0.096388542 | -0.096973501 |
| ENSDART00000005105 | psme1     | 0.846890997  | 0.915850539  | 1.159835522  | 0.124970843  |
| ENSDART00000005119 | eif3i     | 0.208433038  | 0.349717288  | 0.244101269  | 0.053458955  |
| ENSDART00000005143 | mycb      | 0.44444506   | 0.5301099    | 0.532628488  | 0.161240961  |
| ENSDART00000005191 | uqcrb     | -0.157513362 | -0.342943294 | -0.33904791  | -0.120275765 |

|                    |            |              |              |              |              |
|--------------------|------------|--------------|--------------|--------------|--------------|
| ENSDART00000005299 | hsd17b12a  | -0.345584522 | -0.261321345 | -0.169519073 | -0.263954396 |
| ENSDART00000005337 | rimkla     | -0.133054455 | 0.30447461   | 0.568720788  | 0.413212633  |
| ENSDART00000005366 | tpd52l2b   | 0.128420316  | 0.410964244  | 0.59220548   | 0.186138167  |
| ENSDART00000005381 | zgc:110269 | 0.510417857  | 0.424502267  | 0.418900744  | 0.314541955  |
| ENSDART00000005382 | gadd45bb   | 0.573666184  | 0.621043614  | 0.188615995  | 0.24843391   |
| ENSDART00000005453 | chd4a      | 0.299643374  | 0.423708585  | 0.655765013  | 0.391160008  |
| ENSDART00000005479 | chm        | -0.006745339 | 0.178224285  | 0.286548011  | 0.253225199  |
| ENSDART00000005496 | kctd9b     | 0.161429839  | 0.406047159  | 0.541753399  | 0.319048316  |
| ENSDART00000005547 | gnb3b      | -0.185553204 | -0.343974986 | -0.508555347 | -0.13419791  |
| ENSDART00000005568 | pdlim3b    | 0.923424522  | 1.668936507  | 1.372862264  | 1.014758632  |
| ENSDART00000005573 | tmem237b   | 0.093826402  | -0.187405072 | -0.456194249 | -0.210768209 |
| ENSDART00000005590 | churc1     | -0.030881068 | -0.24423848  | -0.319974325 | -0.284115834 |
| ENSDART00000005593 | casp3a     | 0.498469533  | 1.198942327  | 1.332280554  | 0.912417093  |
| ENSDART00000005609 | kifap3a    | 0.203573738  | 0.628570592  | 0.743430197  | 0.605809471  |
| ENSDART00000005616 | rnpep      | 0.523525834  | 0.750055071  | 0.77634383   | 0.462027268  |
| ENSDART00000005638 | stxbp1b    | -0.193317072 | -0.160131943 | -0.312017598 | -0.116900269 |
| ENSDART00000005720 | stat1a     | 0.035880276  | 0.045195542  | 0.615137639  | 0.020671748  |
| ENSDART00000005724 | ncanb      | -0.308688969 | -0.586976696 | -0.410319756 | -0.132925594 |
| ENSDART00000005733 | tma16      | -0.013223994 | -0.144098168 | -0.425909208 | -0.168461973 |
| ENSDART00000005738 | slitrk2    | -0.40615183  | -0.499760308 | -0.343598039 | -0.061449053 |
| ENSDART00000005740 | mef2aa     | -3.741432455 | -2.723175321 | -1.742061709 | -1.012535024 |
| ENSDART00000005784 | itgb1bp1   | 0.440140968  | 0.384181368  | 0.282182476  | -0.012450945 |
| ENSDART00000005842 | fgf1a      | -0.526483511 | -0.462706743 | -0.482028176 | -0.1224057   |
| ENSDART00000005847 | nav3       | 0.773382381  | 1.009593057  | 0.901548272  | 0.783565613  |
| ENSDART00000005869 | rpp14      | -0.113270836 | -0.030182103 | -0.321668148 | -0.171027578 |
| ENSDART00000005929 | ppp3ca     | -0.536938929 | -0.189476468 | 0.016656951  | 0.377870736  |
| ENSDART00000005944 | rpl5a      | 0.381988038  | 0.550810639  | 0.338076702  | 0.013320357  |
| ENSDART00000005957 | lrit1a     | -0.250152343 | -0.282879742 | -0.392873609 | -0.351289311 |
| ENSDART00000005989 | dffb       | 0.378338656  | 0.455339874  | 0.443055793  | 0.165200782  |
| ENSDART00000006058 | eif2s1a    | 0.414016542  | 0.357076684  | 0.28859634   | 0.112415797  |
| ENSDART00000006061 | tcea3      | -0.180343963 | -0.073708986 | -0.351054612 | -0.319778395 |
| ENSDART00000006085 | cbl        | 0.165119386  | 0.1775588    | 0.379174787  | 0.206196339  |
| ENSDART00000006132 | cfl1       | 0.199336875  | 0.296057395  | 0.303504194  | 0.166132927  |
| ENSDART00000006211 | prkcba     | -0.217161161 | -0.38326462  | -0.338691874 | -0.182528175 |
| ENSDART00000006290 | plekhh2    | -0.293609185 | -0.084638835 | -0.118110885 | -0.124049463 |
| ENSDART00000006380 | tbx3a      | -0.244591708 | -0.352646993 | -0.144447405 | 0.06961498   |
| ENSDART00000006381 | psen2      | 0.338086739  | 0.204848015  | 0.067000942  | -0.024014416 |
| ENSDART00000006417 | pgm1       | -0.367653769 | -0.345273975 | -0.348210636 | -0.086795004 |
| ENSDART00000006435 | gpr27      | -0.291018325 | -0.294873264 | -0.134468137 | 0.025589784  |
| ENSDART00000006474 | glra4b     | -0.56482245  | -0.497893783 | 0.107334542  | 0.502166045  |
| ENSDART00000006489 | acsl4a     | 0.116872844  | 1.158097412  | 1.477099844  | 0.59458295   |
| ENSDART00000006513 | pdhb       | -0.272240562 | -0.336402892 | -0.245891496 | -0.069634702 |
| ENSDART00000006602 | pde4a      | -0.284660623 | -0.353015908 | -0.053068214 | 0.108985293  |
| ENSDART00000006604 | clpp       | 0.129850837  | 0.170330862  | 0.350507109  | 0.146117928  |
| ENSDART00000006612 | tbr1b      | -1.166029945 | -1.008207372 | 0.617040877  | 1.169470893  |
| ENSDART00000006619 | rbpms2b    | -0.996572205 | -0.617915271 | -0.145310289 | 0.143289699  |
| ENSDART00000006724 | smarcd3b   | -0.214336649 | 0.06424201   | 0.499562006  | 0.504466248  |
| ENSDART00000006778 | acat2      | -0.122422954 | 0.489045334  | 0.688039864  | 0.280940334  |
| ENSDART00000006802 | cct7       | 0.251283975  | 0.283261629  | 0.291096583  | 0.139424973  |
| ENSDART00000006843 | cacng1a    | 0.923524414  | 3.482209925  | 3.70002605   | 2.994326832  |
| ENSDART00000006908 | itgb3b     | 1.52546911   | 1.915133846  | 1.613887964  | 0.668451164  |

|                    |            |              |              |              |              |
|--------------------|------------|--------------|--------------|--------------|--------------|
| ENSDART00000006927 | use1       | -0.314698173 | -0.230168127 | -0.342013543 | -0.20782604  |
| ENSDART00000006990 | elovl5     | -0.296553838 | -0.148251934 | 0.039955151  | -0.062523987 |
| ENSDART00000007021 | atp6v1ba   | -0.168038972 | -0.268033099 | -0.367112615 | -0.152327119 |
| ENSDART00000007103 | nuak1a     | -0.384666887 | -0.409555272 | 0.121768678  | 0.275010156  |
| ENSDART00000007122 | guca1b     | -0.373174817 | -0.243090423 | -0.518795688 | -0.641476933 |
| ENSDART00000007204 | ddx49      | 0.428211201  | 0.38977455   | 0.371001972  | 0.147828916  |
| ENSDART00000007208 | lrrc4bb    | -0.502121898 | -0.528156819 | 0.019633372  | 0.067706598  |
| ENSDART00000007231 | psmb1      | 0.336843399  | 0.41477024   | 0.441532829  | 0.103495117  |
| ENSDART00000007271 | mtfr1l     | -0.183189215 | -0.389013192 | -0.122809179 | -0.106769923 |
| ENSDART00000007293 | tcap       | 1.354758323  | 0.76915174   | 1.088235317  | 0.716372996  |
| ENSDART00000007308 | wnt10a     | -1.246823676 | -1.58888825  | -0.322358389 | 0.209755977  |
| ENSDART00000007401 | MAP3K13    | -0.231843501 | -0.363439198 | -0.331818795 | -0.269324908 |
| ENSDART00000007512 | pole3      | 0.11728021   | 0.33533824   | 0.217028028  | 0.042569097  |
| ENSDART00000007522 | anos1a     | -0.500742525 | -0.407287946 | -0.526812004 | -0.211300468 |
| ENSDART00000007531 | slit2      | -0.281096395 | -0.311205466 | -0.174560483 | 0.038385548  |
| ENSDART00000007584 | snap25a    | -0.520469397 | -0.457109198 | -0.208714288 | -0.117586032 |
| ENSDART00000007587 | gtf2h2     | 0.253100515  | 0.350059727  | 0.329257684  | 0.204207466  |
| ENSDART00000007624 | plch2a     | -0.294880531 | -0.004127951 | 0.226839247  | 0.19499931   |
| ENSDART00000007630 | nhlh2      | -0.28794611  | -0.324673306 | -0.385652145 | -0.261092419 |
| ENSDART00000007642 | zgc:110239 | 0.831334701  | 0.383173307  | 0.0742642    | -0.168536089 |
| ENSDART00000007778 | grik1a     | -0.423674769 | -0.190804556 | -0.271114709 | -0.0631136   |
| ENSDART00000007789 | idh1       | 0.209391072  | 0.491026617  | 0.59658334   | 0.190896441  |
| ENSDART00000007797 | slc30a4    | 0.328612859  | 0.21837447   | 0.122260678  | 0.141372312  |
| ENSDART00000007806 | zbtb16a    | -0.634450415 | -0.731920804 | 0.190781828  | -0.364381887 |
| ENSDART00000007827 | spra       | 0.429147243  | 0.5653912    | 0.349944557  | -0.12347627  |
| ENSDART00000007856 | fkbp16     | -0.168302487 | -0.129290801 | -0.313457803 | -0.012446152 |
| ENSDART00000007857 | mettl2a    | 0.337109376  | 0.448868897  | 0.378403392  | 0.127678255  |
| ENSDART00000007961 | nt5c2l1    | 0.559923749  | 0.945665914  | 1.614610333  | 0.555210778  |
| ENSDART00000007972 | dlgap4b    | -0.346497047 | -0.558852799 | -0.093125576 | -0.08715572  |
| ENSDART00000008010 | pdk2a      | -0.070635847 | 0.148907691  | -0.31523766  | -0.171233724 |
| ENSDART00000008038 | sulf2a     | 0.420520728  | 1.274767381  | 2.360438199  | 2.491815243  |
| ENSDART00000008058 | aak1a      | -0.071484403 | -0.294378944 | -0.458052722 | -0.070668535 |
| ENSDART00000008152 | sgk2b      | 1.195404929  | 0.789404089  | 0.784574894  | 0.645661759  |
| ENSDART00000008287 | pgam1a     | -0.270559913 | -0.416576315 | -0.324017463 | -0.168254728 |
| ENSDART00000008302 | insra      | -0.066772744 | -0.178139649 | -0.319689592 | -0.098012672 |
| ENSDART00000008326 | pon2       | 0.005358778  | -0.010211923 | -0.591626082 | -0.490299784 |
| ENSDART00000008373 | fosl1a     | 0.78271954   | 0.570182098  | 0.226810387  | -0.332448721 |
| ENSDART00000008402 | sart3      | -0.246563675 | -0.213758299 | -0.263959387 | -0.22518745  |
| ENSDART00000008594 | tmem178    | -0.626672748 | -0.469011917 | -0.272377327 | 0.052520712  |
| ENSDART00000008607 | ttyh2l     | 0.127438148  | -0.071060271 | -0.346686037 | -0.327410338 |
| ENSDART00000008638 | rgma       | -0.505076193 | -0.28541733  | -0.181405309 | 0.127564695  |
| ENSDART00000008663 | adam10b    | 0.007023444  | 0.111335196  | 0.430661155  | 0.328928973  |
| ENSDART00000008711 | gys1       | -0.668450567 | -0.607630136 | -0.28295897  | -0.009086585 |
| ENSDART00000008785 | anp32a     | -0.194673883 | -0.086461888 | -0.275568041 | -0.184432261 |
| ENSDART00000008807 | rpl12      | 0.258765274  | 0.397825613  | 0.190712058  | -0.053203791 |
| ENSDART00000008840 | otofa      | -0.788283647 | -0.975123326 | -0.33101193  | -0.149384457 |
| ENSDART00000008854 | wsb1       | 0.135165037  | 0.298497884  | 0.131347407  | -0.114776528 |
| ENSDART00000008906 | znf503     | -0.367880648 | -0.389528031 | 0.161538025  | 0.184463     |
| ENSDART00000008986 | atp6v1e1a  | 0.082323928  | -0.133398426 | -0.212735096 | -0.280773093 |
| ENSDART00000009164 | esco2      | 1.573729566  | 0.878542321  | 0.358323204  | 0.160150267  |
| ENSDART00000009178 | impdh2     | 0.589155818  | 0.398351191  | 0.511972012  | 0.456829015  |

|                    |           |              |              |              |              |
|--------------------|-----------|--------------|--------------|--------------|--------------|
| ENSDART00000009194 | aimp2     | 0.035867833  | 0.204745928  | 0.516008081  | 0.307277143  |
| ENSDART00000009241 | rpl35     | 0.440738233  | 0.45418276   | 0.310964715  | 0.055658665  |
| ENSDART00000009277 | tuba1a    | 0.466164103  | 1.394077049  | 1.773814961  | 1.31379942   |
| ENSDART00000009337 | eno1a     | -0.396364992 | -0.428345122 | -0.288646494 | -0.130833414 |
| ENSDART00000009343 | pyroxd2   | 0.778556587  | 0.730253969  | 0.295998209  | 0.188824159  |
| ENSDART00000009393 | col1a1a   | 0.640444957  | 1.804362836  | 2.839654111  | 1.436438571  |
| ENSDART00000009477 | cct8      | 0.2739469    | 0.4225965    | 0.299361505  | 0.113502813  |
| ENSDART00000009484 | cct6a     | 0.227309436  | 0.27374384   | 0.264898076  | 0.101996724  |
| ENSDART00000009549 | rhag      | 0.97898574   | 1.27206332   | 1.678759018  | 0.617102069  |
| ENSDART00000009569 | slc12a5b  | -0.543274129 | -0.639831062 | -0.420973005 | -0.072437192 |
| ENSDART00000009609 | EIF5A     | 0.382861639  | 0.513300938  | 0.466153608  | 0.171038659  |
| ENSDART00000009653 | KCNA1B    | -0.51649998  | -0.917921415 | -0.602149268 | -0.420615578 |
| ENSDART00000009689 | MHC1UBA   | 0.3733109    | 0.635354786  | 0.756757815  | 0.245538965  |
| ENSDART00000009691 | SCML4     | -0.348233268 | -0.325522885 | -0.113421585 | 0.115178638  |
| ENSDART00000009740 | SMAD7     | -0.082405078 | -0.352637537 | -0.492507075 | -0.066549718 |
| ENSDART00000009777 | GLRA3     | -0.385455571 | -0.554614528 | -0.516083394 | -0.22262256  |
| ENSDART00000009888 | CASQ1B    | 2.284244029  | 1.995698495  | 4.521796612  | 3.078320888  |
| ENSDART00000009892 | GABBR1A   | -0.618262887 | -0.683782394 | 0.013008531  | 0.484024166  |
| ENSDART00000009938 | TCF12     | -0.385864267 | -0.351608927 | -0.283149928 | -0.323464659 |
| ENSDART00000009952 | ZFAND5A   | -0.376361025 | -0.47427013  | -1.180526792 | -1.063292908 |
| ENSDART00000010041 | DHFR      | 0.095253657  | -0.024940068 | -0.334824981 | -0.34089932  |
| ENSDART00000010046 | RHPN2     | -0.531285649 | -0.280012714 | -0.367908087 | -0.481376216 |
| ENSDART00000010104 | CRTAP     | 0.225199403  | 0.115819527  | -0.25953471  | -0.588755148 |
| ENSDART00000010119 | EEF1A2    | -1.586399577 | -1.404358062 | -0.455450934 | 0.174130308  |
| ENSDART00000010140 | IGF2BP3   | 0.357904839  | 0.436869624  | 1.38352682   | 1.118120985  |
| ENSDART00000010144 | PVALB2    | 0.379417352  | 4.690875982  | 5.447468716  | 3.629116223  |
| ENSDART00000010199 | FAM219AB  | -0.329176512 | -0.152550548 | -0.14317011  | 0.01066054   |
| ENSDART00000010246 | UGT1AB    | 1.578212697  | 1.169819697  | 0.509084599  | -0.046131609 |
| ENSDART00000010256 | EIF3M     | 0.301540845  | 0.415293475  | 0.295465222  | 0.073592881  |
| ENSDART00000010257 | FAM73A    | -0.203941778 | -0.403469011 | -0.199714259 | -0.045216291 |
| ENSDART00000010261 | PNO1      | 0.396735226  | 0.379415162  | 0.20506239   | -0.042887698 |
| ENSDART00000010271 | AIDA      | 0.207262438  | 0.531449642  | 0.462716258  | 0.148174666  |
| ENSDART00000010274 | DPYSL5A   | 0.119382655  | 1.052869734  | 1.414498731  | 1.230769727  |
| ENSDART00000010282 | CBR1L     | 0.612622623  | 0.498855932  | 0.466697421  | -0.088158588 |
| ENSDART00000010378 | MYO3B     | 0.121341422  | -0.396947151 | -0.677290933 | -0.232688387 |
| ENSDART00000010420 | ACTR1     | 0.079833108  | 0.201277948  | 0.258101559  | 0.148775132  |
| ENSDART00000010452 | ZGC:91860 | -0.346186809 | -0.437676548 | -0.463741509 | -0.203120402 |
| ENSDART00000010495 | ZNRF1     | 0.045008698  | 0.17288769   | 0.379569247  | 0.252907322  |
| ENSDART00000010512 | ZGC:92907 | -0.132831847 | -0.132364384 | -0.338242819 | -0.200606823 |
| ENSDART00000010647 | RCC2      | 0.312248055  | 0.54892666   | 0.398800486  | 0.1537421    |
| ENSDART00000010683 | IMPA1     | 0.486043053  | 0.448191747  | 0.382482237  | 0.291162031  |
| ENSDART00000010757 | RGMB      | -0.151394227 | 0.132378035  | 0.469172545  | 0.35352068   |
| ENSDART00000010824 | ACY1      | -0.16534468  | -0.281016974 | -0.38333817  | -0.31990568  |
| ENSDART00000010982 | FGF13A    | -0.282182655 | -0.227308636 | -0.321295112 | -0.222652121 |
| ENSDART00000010997 | TPM3      | 0.446911874  | 0.508209148  | 0.705423057  | 0.171806011  |
| ENSDART00000011004 | MFSD5     | -0.162600193 | -0.289194121 | -0.512584457 | -0.472173717 |
| ENSDART00000011052 | EIF3D     | 0.194265429  | 0.254685579  | 0.234360887  | -0.025541379 |
| ENSDART00000011135 | KITA      | -0.1368269   | -0.266279657 | -0.502022945 | -0.592221276 |
| ENSDART00000011143 | MYD88     | 0.15184495   | 0.21846972   | -0.215204616 | -0.645828486 |
| ENSDART00000011149 | FAM185A   | -0.225870361 | -0.305876809 | -0.396323932 | -0.356813487 |
| ENSDART00000011224 | ITGA10    | 2.439207816  | 3.888845597  | 4.302533523  | 3.055176776  |

|                    |                  |              |              |              |              |
|--------------------|------------------|--------------|--------------|--------------|--------------|
| ENSDART00000011229 | sub1b            | -0.082257398 | -0.179031151 | -0.405374566 | -0.271111897 |
| ENSDART00000011251 | rpl3             | 0.32045382   | 0.346921833  | 0.271797845  | 0.014406427  |
| ENSDART00000011258 | npl              | 0.373272645  | 0.54061543   | 0.468726439  | 0.170404917  |
| ENSDART00000011283 | cnr1             | 0.295670673  | 0.19447276   | 0.12958679   | 0.047335468  |
| ENSDART00000011287 | aqp4             | -0.584037248 | -0.688442177 | -0.670108654 | -0.488547149 |
| ENSDART00000011305 | dpp3             | 0.260304454  | 0.228408409  | 0.405249148  | 0.162562787  |
| ENSDART00000011317 | ntm              | -0.235410973 | -0.452806913 | -0.580240928 | -0.252707536 |
| ENSDART00000011362 | arrdc2           | 0.681126697  | 0.66886629   | 0.476399009  | 0.092022718  |
| ENSDART00000011398 | si:ch73-335l21.1 | -0.01193014  | -0.263037651 | -0.302583762 | -0.048051484 |
| ENSDART00000011447 | sae1             | 0.282597281  | 0.674186287  | 0.734155697  | 0.424524708  |
| ENSDART00000011453 | sypb             | -0.342744234 | -0.453708067 | -0.33513289  | -0.074863584 |
| ENSDART00000011456 | tsg101b          | 0.363139745  | 0.1150057    | 0.061390783  | -0.157671493 |
| ENSDART00000011519 | slc6a1l          | 0.105782424  | -0.162202998 | -0.466558128 | -0.662799909 |
| ENSDART00000011568 | syngr3a          | -0.064295047 | 0.234968681  | 0.63147157   | 0.633880469  |
| ENSDART00000011570 | zgc:101716       | 0.810996291  | 0.904458728  | 0.54949556   | 0.44631829   |
| ENSDART00000011627 | irx7             | -0.27830639  | -0.509115666 | -0.233145912 | -0.150983114 |
| ENSDART00000011691 | baxa             | 0.500319714  | 0.752407609  | 0.690306826  | 0.30333895   |
| ENSDART00000011699 | nono             | 0.031722902  | 0.329157035  | 0.240624596  | 0.057167441  |
| ENSDART00000011863 | hdlbpa           | 0.44689202   | 0.322223522  | 0.244841165  | -0.050194137 |
| ENSDART00000011865 | sec23b           | -0.409405473 | 0.102005828  | 0.534469651  | 0.138588714  |
| ENSDART00000011878 | eif4a1b          | 0.134279506  | 0.344064551  | 0.309281202  | 0.284267369  |
| ENSDART00000011936 | ccdc106a         | -0.452156269 | -0.26003137  | -0.330808493 | -0.261299438 |
| ENSDART00000012023 | faimb            | -0.164145301 | -0.164693039 | -0.391621682 | -0.153828799 |
| ENSDART00000012119 | zgc:110366       | -0.07598566  | 0.059679618  | -0.31484475  | -0.244737795 |
| ENSDART00000012164 | tmod2            | 0.222306993  | 0.411676025  | 0.560901639  | 0.297325519  |
| ENSDART00000012229 | fkbp1b           | -0.199888531 | -0.218085861 | -0.490853212 | -0.25173597  |
| ENSDART00000012247 | dhcr24           | 2.392110544  | 2.697063662  | 3.119814675  | 2.653468904  |
| ENSDART00000012256 | tnni2a.3         | 0.628164776  | 3.762159614  | 4.672246791  | 3.241031276  |
| ENSDART00000012357 | sav1             | 0.272575283  | 0.33526037   | 0.280505115  | -0.039530435 |
| ENSDART00000012376 | gabrr1           | -0.444264456 | -0.314539223 | -0.677749333 | -0.339326443 |
| ENSDART00000012391 | cabp1a           | -0.440359676 | -0.517676368 | -0.117661538 | 0.040314239  |
| ENSDART00000012450 | dvl2             | 0.778001668  | 0.759654351  | 0.507462592  | -0.16358587  |
| ENSDART00000012478 | mmadhc           | -0.097599671 | -0.214733382 | -0.311326383 | -0.186284094 |
| ENSDART00000012546 | ctbp2a           | -0.410954451 | -0.209595307 | -0.078015176 | -0.146761341 |
| ENSDART00000012580 |                  | -0.21861763  | 0.154213857  | -0.169850923 | -1.246152902 |
| ENSDART00000012673 | gnb3a            | -0.611271729 | -0.360057677 | -0.265096652 | -0.439594606 |
| ENSDART00000012677 | OTUD7A           | -0.320444813 | -0.33972382  | -0.130240255 | -0.027710623 |
| ENSDART00000012686 | dnase1l4.1       | 0.654985436  | 1.279054377  | 1.240763186  | 0.531962605  |
| ENSDART00000012718 | fabp11b          | 1.386159817  | 1.224465105  | 0.518278623  | -0.419802831 |
| ENSDART00000012791 | sp8a             | 1.57251014   | 2.331511764  | 2.00847442   | 1.039704847  |
| ENSDART00000012822 | CR354540.1       | -0.197702519 | 0.015464017  | -0.410213127 | -0.063874026 |
| ENSDART00000012859 | psma6b           | 0.220061705  | 0.322650996  | 0.197619136  | 0.013143764  |
| ENSDART00000012862 | isl2a            | -0.663813396 | 0.011664777  | 0.746201858  | 1.074694305  |
| ENSDART00000012938 | phgdh            | -0.315221747 | -0.241109028 | -0.448879252 | -0.249449553 |
| ENSDART00000012940 | grm2b            | -0.52717467  | -0.642099924 | -0.570224924 | -0.520457538 |
| ENSDART00000013003 | tfap2b           | -0.29930992  | -0.578681033 | -0.25971747  | -0.279510711 |
| ENSDART00000013066 | ercc3            | 0.273698243  | 0.1312947    | 0.187090251  | 0.076904615  |
| ENSDART00000013117 | syt5b            | -0.473395784 | -0.439637374 | -0.372750952 | -0.393185839 |
| ENSDART00000013228 | cacna1aa         | -0.425294008 | -0.48842278  | 0.10428355   | 0.42170802   |
| ENSDART00000013229 | gnaq             | 0.258587746  | 0.466151888  | 0.597563156  | 0.37656513   |
| ENSDART00000013263 | ugdh             | 0.441443931  | 0.390023192  | 0.086037142  | -0.108373731 |

|                    |                   |              |              |              |              |
|--------------------|-------------------|--------------|--------------|--------------|--------------|
| ENSDART00000013311 | grm6a             | -0.718441456 | -0.89272341  | -0.019297194 | 0.441642652  |
| ENSDART00000013360 | ppp1r3cb          | -0.357586146 | -0.346668382 | -0.405594995 | -0.235559662 |
| ENSDART00000013409 | prmt3             | 0.583250552  | 0.486757337  | 0.420985526  | -0.028812313 |
| ENSDART00000013411 | cahz              | -0.282657507 | -0.146895201 | -0.382063619 | -0.133810291 |
| ENSDART00000013449 | CHST13            | 0.129876823  | 0.161538207  | -0.188391866 | -0.557482268 |
| ENSDART00000013575 | bzw1a             | 0.288880361  | 0.296312188  | 0.255308329  | 0.039925909  |
| ENSDART00000013588 | klhl41b           | 0.067761781  | 2.964864958  | 3.322998807  | 2.346652378  |
| ENSDART00000013605 | zbtb20            | 0.021191929  | 0.070670156  | 0.462529396  | 0.345025042  |
| ENSDART00000013690 | rplp2l            | 0.526551673  | 0.441805947  | 0.587852857  | 0.20929518   |
| ENSDART00000013781 | mcm6              | 1.053827708  | 1.005302691  | 0.681665045  | 0.184026433  |
| ENSDART00000013785 | insig1            | -0.148803263 | 0.843708665  | 1.082868772  | 0.366540247  |
| ENSDART00000013797 | asb8              | -0.250585187 | -0.305587852 | -0.166685061 | -0.071337431 |
| ENSDART00000013835 | bloc1s1           | 0.447187715  | 0.435712256  | 0.356793883  | 0.203995374  |
| ENSDART00000013839 | tmbim4            | -0.093382601 | -0.138429676 | -0.303111951 | -0.191824583 |
| ENSDART00000013961 | mycla             | 0.091841991  | 0.503579515  | 0.855574629  | 0.294011787  |
| ENSDART00000014021 | slc25a39          | -0.175830036 | -0.233948732 | -0.630252381 | -0.299226836 |
| ENSDART00000014031 | dpf2              | 0.062076591  | -0.192206303 | -0.356876024 | -0.045146421 |
| ENSDART00000014036 | optn              | -0.037971093 | -0.094029875 | -0.163689177 | -0.30174806  |
| ENSDART00000014049 | wdr36             | 0.429321608  | 0.423447996  | 0.351992847  | 0.181701695  |
| ENSDART00000014058 | zgc:100829        | 0.836226257  | 1.366715788  | 1.414785917  | 0.344237354  |
| ENSDART00000014095 | rap2c             | 0.031678102  | 0.116919511  | 0.30035611   | 0.141485249  |
| ENSDART00000014098 | ggctb             | -0.310700478 | -0.20595478  | -0.456981273 | -1.259991115 |
| ENSDART00000014168 | zfp36l1b          | -0.068733676 | -0.015026144 | -0.139788147 | -0.387873136 |
| ENSDART00000014183 | colgalt2          | -0.33250641  | -0.46357994  | -0.396923695 | -0.603253205 |
| ENSDART00000014207 | myl1              | 0.550709909  | 1.927654149  | 2.148710994  | 1.508189135  |
| ENSDART00000014274 | glcea             | -0.30114601  | -0.147144768 | -0.347048688 | -0.226291229 |
| ENSDART00000014306 | mpp5a             | -0.106349761 | -0.16109327  | -0.308554572 | -0.109175977 |
| ENSDART00000014568 | urod              | 0.384025692  | 0.230369566  | 0.194017408  | -0.024966445 |
| ENSDART00000014632 | katnb1            | -0.1660519   | -0.366507385 | -0.386560357 | -0.02476169  |
| ENSDART00000014668 | pcsk1             | -0.444651661 | -0.49391188  | -0.327964124 | -0.406864512 |
| ENSDART00000014726 | tp53i11b          | -0.378677803 | -0.267454179 | -0.193372925 | -0.148965425 |
| ENSDART00000014729 | arpc1a            | 0.133812581  | 0.244815919  | 0.290121908  | 0.113999438  |
| ENSDART00000014806 | npas2             | -0.341343772 | 0.009000027  | 0.555800516  | 0.156695025  |
| ENSDART00000014843 | bdnf              | -0.572929745 | -0.434797241 | -0.517838864 | -0.969054184 |
| ENSDART00000014871 | akr7a3            | 0.445881137  | 0.133128629  | 0.063605049  | 0.058812872  |
| ENSDART00000014877 | robo2             | -0.381239115 | -0.949448522 | 0.586346925  | 0.554614257  |
| ENSDART00000014897 | srgap1b           | -0.562468132 | -0.53652608  | -0.21984937  | 0.24230424   |
| ENSDART00000014922 | arhgap22          | 0.337853511  | 0.496203573  | 0.771443869  | 0.664153347  |
| ENSDART00000014983 | zgc:153867        | 0.36977967   | 0.600215172  | 0.463408621  | 0.079627153  |
| ENSDART00000015034 | blvrb             | 0.700108065  | 0.61517331   | 0.539502173  | -0.031641171 |
| ENSDART00000015040 | hrasb             | -0.035400047 | 0.468215746  | 0.71708775   | 0.509094476  |
| ENSDART00000015081 | COX5B (1 of many) | -0.161517675 | -0.197504434 | -0.340992957 | -0.152202035 |
| ENSDART00000015092 | col1a1b           | 0.334762626  | 1.456833944  | 2.512390696  | 1.131086568  |
| ENSDART00000015095 | uts1              | -0.304915972 | -0.432455801 | -0.651436618 | -0.693973757 |
| ENSDART00000015103 | hps3              | 0.398719216  | 0.34180849   | 0.31802597   | 0.20234989   |
| ENSDART00000015193 | chmp4bb           | 0.349511966  | 0.500219693  | 0.425249872  | 0.076172611  |
| ENSDART00000015279 | rtn4rl1a          | -0.620130019 | -0.765846328 | -0.205912996 | 0.07424375   |
| ENSDART00000015286 | ankrd13b          | -0.294042347 | 0.149598935  | 0.484140903  | 0.605167909  |
| ENSDART00000015333 | gbx2              | -0.202064704 | -0.378779754 | -0.261598975 | -0.176372699 |
| ENSDART00000015374 | cyb5r1            | 0.481284363  | 0.621601719  | 0.549959374  | 0.29311095   |
| ENSDART00000015401 | ercc6l            | 1.183315334  | 0.605525038  | 0.299117061  | -0.215859916 |

|                    |                   |              |              |              |              |
|--------------------|-------------------|--------------|--------------|--------------|--------------|
| ENSDART00000015418 | irf2bpl           | -0.517127602 | -0.432851187 | -0.112506589 | -0.180160421 |
| ENSDART00000015628 | klhl24b           | 0.257620397  | 0.582600724  | 0.358856753  | 0.009507758  |
| ENSDART00000015629 | stxbp1a           | -0.407999477 | -0.254916105 | -0.074938098 | 0.048338374  |
| ENSDART00000015632 | nkain1            | 0.221220236  | 0.815235139  | 1.176280245  | 0.965286214  |
| ENSDART00000015710 | snrkb             | -0.234771599 | -0.444259361 | -0.383002363 | -0.24868656  |
| ENSDART00000015732 | mylz3             | 0.011883193  | 1.89110665   | 2.420669252  | 1.523105093  |
| ENSDART00000015755 | rasl11b           | -0.21929532  | -0.630137444 | -0.720127948 | -0.404206999 |
| ENSDART00000015777 | abce1             | 0.253644034  | 0.246716072  | 0.263123796  | 0.067670414  |
| ENSDART00000015827 | tnr               | -0.348895518 | -0.471355706 | -0.275641147 | -0.100175719 |
| ENSDART00000015841 | gstt1b            | 0.844147349  | 0.559916631  | 0.300223231  | -0.404935077 |
| ENSDART00000015951 | bsg               | -0.039046362 | -0.213267965 | -0.489263219 | -0.308938953 |
| ENSDART00000015956 | efna1b            | -0.412330789 | -0.211680079 | -0.214205067 | -0.214663513 |
| ENSDART00000015979 | farsb             | 0.087018819  | 0.265294461  | 0.405710239  | 0.211888538  |
| ENSDART00000016053 | rnf144aa          | -0.119412737 | -0.323472384 | -0.040822296 | 0.138732642  |
| ENSDART00000016057 | ctnnal1           | 0.110311248  | 0.013228232  | -0.224558056 | -0.622388694 |
| ENSDART00000016099 | CASKIN2           | -0.196661177 | -0.318487444 | -0.498724654 | -0.242993173 |
| ENSDART00000016112 | capns1b           | 0.258538261  | 0.719472725  | 0.61845775   | 0.248329876  |
| ENSDART00000016135 | nfe2l3            | 0.030439041  | 0.342226134  | 0.430712572  | 0.086440986  |
| ENSDART00000016143 | SPIN4 (1 of many) | -0.27419945  | -0.33038212  | -0.171096922 | -0.003336972 |
| ENSDART00000016181 | ndrg3a            | -0.359622862 | -0.274997666 | -0.226177976 | -0.143111599 |
| ENSDART00000016283 | psmd11b           | 0.064194443  | 0.317482468  | 0.345168865  | 0.113362384  |
| ENSDART00000016303 | irx2a             | -0.381386746 | 0.064410059  | 0.752093904  | 0.989751717  |
| ENSDART00000016350 | pgam1b            | -0.297181524 | -0.257905953 | 0.060817132  | 0.142368471  |
| ENSDART00000016360 | si:ch73-199e17.1  | 2.690029092  | 3.363503415  | 3.69470671   | 3.529091333  |
| ENSDART00000016370 | dirc2             | 0.134905484  | 0.442850685  | 0.565287267  | 0.464631841  |
| ENSDART00000016464 | dcps              | 0.045608002  | 0.377363095  | -0.076988765 | 0.017970252  |
| ENSDART00000016535 | kcns3a            | -1.299949965 | -1.227726419 | -0.464780559 | 0.150117362  |
| ENSDART00000016591 | fgf6a             | 0.502410209  | 1.375431955  | 1.297903392  | 1.026892284  |
| ENSDART00000016597 | nfkbiab           | 0.207474067  | 0.316720279  | 0.269395099  | 0.411969915  |
| ENSDART00000016602 | cdh23             | -0.199390412 | -0.313772685 | -0.367682037 | -0.223939401 |
| ENSDART00000016628 | fam129bb          | 0.861865647  | 1.020541987  | 0.89470832   | 0.182764632  |
| ENSDART00000016710 | scrn3             | -0.247629441 | -0.171036354 | 0.44401532   | -0.052873668 |
| ENSDART00000016791 | eif3c             | -0.057805139 | -0.126818292 | -0.360850099 | 0.005995136  |
| ENSDART00000016803 | grpel1            | -0.106418203 | -0.12256904  | -0.467582595 | -0.298130125 |
| ENSDART00000016814 | fmnl2a            | 0.496433192  | 0.213976057  | -0.143298216 | -0.634969289 |
| ENSDART00000016860 | ppp2r1bb          | 0.018499492  | 0.284521267  | 0.321334616  | 0.193996267  |
| ENSDART00000016864 | slc35f6           | 0.392001078  | 0.280281029  | 0.187768856  | 0.16995993   |
| ENSDART00000016890 | eif6              | 0.391815405  | 0.223439355  | 0.155230229  | 0.056706473  |
| ENSDART00000016916 | gria4b            | -0.27171917  | -0.41554348  | -0.145968175 | 0.021630803  |
| ENSDART00000016946 | glud1a            | 0.489439701  | 0.519599049  | 0.659106358  | 0.391317016  |
| ENSDART00000016983 | spon1a            | -0.566333419 | -0.54864414  | -0.425205045 | -0.214533594 |
| ENSDART00000017148 | gclc              | 0.213009245  | 0.302558434  | 0.032586299  | -0.083839473 |
| ENSDART00000017153 | hps4              | 0.574215829  | 0.524013089  | 0.377950963  | 0.050651634  |
| ENSDART00000017176 | dkc1              | 0.45463167   | 0.261033913  | 0.276931433  | 0.02149911   |
| ENSDART00000017202 | kcnk1b            | -0.464281499 | -0.11026216  | 0.124659295  | 0.114555904  |
| ENSDART00000017229 | ncam1a            | -0.359842421 | -0.143522661 | 0.045009487  | 0.122759016  |
| ENSDART00000017230 | snrpc             | 0.173923367  | 0.335809723  | 0.464722714  | 0.188235196  |
| ENSDART00000017259 | fgf13a            | -0.403933655 | -0.684393894 | -0.638256176 | -0.336496098 |
| ENSDART00000017292 | stxbp5l           | -0.151460711 | -0.273207638 | -0.026036945 | 0.086181343  |
| ENSDART00000017299 | tdg.1             | 0.102853523  | 0.194463285  | 0.348171907  | 0.196594799  |
| ENSDART00000017309 | ca16b             | -0.395585068 | -0.492018229 | -0.260071918 | -0.046674115 |

|                    |                   |              |              |              |              |
|--------------------|-------------------|--------------|--------------|--------------|--------------|
| ENSDART00000017359 | sfpq              | 0.205055054  | 0.247501694  | 0.177806588  | 0.262507487  |
| ENSDART00000017413 | zmynd10           | 1.112930172  | 1.692414467  | 1.985637202  | 1.515304432  |
| ENSDART00000017422 | tbc1d17           | 0.129347814  | 0.49736446   | 0.343125168  | -0.01149421  |
| ENSDART00000017424 | ptmaa             | -0.012891551 | -0.178423729 | -0.469624362 | -0.475147609 |
| ENSDART00000017485 | sf3b6             | -0.19155437  | -0.273140548 | -0.376775786 | -0.432460535 |
| ENSDART00000017551 | slc6a1b           | -0.387372781 | -0.441576322 | -0.34448646  | -0.23699282  |
| ENSDART00000017593 | tmem237a          | 0.016738535  | -0.334661164 | -0.543525535 | -0.214177149 |
| ENSDART00000017599 | rem1              | -0.151492945 | -0.383680013 | -0.100323724 | -0.098680467 |
| ENSDART00000017619 | impdh1a           | -0.178621661 | -0.394468991 | -0.26888728  | -0.032885741 |
| ENSDART00000017646 | atp6v0a1a         | 1.074304865  | 0.491570366  | 0.543801777  | 0.26961956   |
| ENSDART00000017679 | ppp2r2ca          | -0.437371106 | -0.275733569 | 0.22042039   | 0.361372826  |
| ENSDART00000017695 | foxd3             | 1.678381818  | 3.49818723   | 3.736655174  | 1.826274371  |
| ENSDART00000017763 | CABZ01071180.1    | -0.429470778 | -0.866508186 | -0.658991937 | -0.375481088 |
| ENSDART00000017774 | cacng5a           | -0.685385238 | -0.470575642 | -0.348446742 | -0.159039188 |
| ENSDART00000017829 | HELZ2 (1 of many) | 0.30258536   | 0.160661865  | 1.299699291  | -0.234524229 |
| ENSDART00000018047 | zgc:112294        | -0.129085452 | -0.359907528 | -0.863079854 | -0.32905376  |
| ENSDART00000018054 | trh               | -0.369432982 | -0.400024601 | -0.784012545 | -0.865751572 |
| ENSDART00000018117 | ppp1r14aa         | -0.10674343  | -0.179038105 | -0.425069279 | -0.232436913 |
| ENSDART00000018150 | neurod6b          | 0.484226112  | 1.695956927  | 1.935318885  | 1.555476315  |
| ENSDART00000018155 | adss              | -0.479311511 | -0.372005861 | -0.294412527 | -0.197085254 |
| ENSDART00000018159 | FOXK2 (1 of many) | 0.025048904  | 0.121059845  | 0.321917677  | 0.256498575  |
| ENSDART00000018163 | irf2bp1           | -0.194489303 | -0.25009473  | -0.19907539  | -0.124082211 |
| ENSDART00000018228 | gsk3b             | -0.075471253 | 0.063596815  | 0.240256058  | 0.249724511  |
| ENSDART00000018261 | akr1b1            | 1.00051996   | 0.934286328  | 0.670184322  | 0.161867768  |
| ENSDART00000018304 | mcm3              | 0.755786584  | 0.39595981   | 0.332438259  | 0.197655199  |
| ENSDART00000018347 | cab39l1           | -0.259625217 | -0.162823278 | -0.312896931 | -0.294075261 |
| ENSDART00000018351 | zgc:65851         | -1.669295979 | -1.346342078 | -0.126748353 | 0.319422369  |
| ENSDART00000018408 | anxa13l           | 0.767695981  | 1.876785961  | 1.969202275  | 1.362090979  |
| ENSDART00000018461 | vmp1              | 0.430900752  | 0.323245721  | 0.184562524  | 0.049764543  |
| ENSDART00000018475 | snrpd3            | 0.421865611  | 0.381193487  | 0.380446926  | 0.20019783   |
| ENSDART00000018498 | helz2             | -0.063748361 | -0.192163226 | 1.151139617  | 0.013207133  |
| ENSDART00000018501 | opn4.1            | -0.494086134 | -0.180456491 | -0.369290026 | -0.100666897 |
| ENSDART00000018523 | ahcy              | 0.45208938   | 0.606696476  | 0.316876579  | -0.072835379 |
| ENSDART00000018528 |                   | -0.854763044 | -1.028413156 | -0.142975543 | -0.344918955 |
| ENSDART00000018603 | tbx4              | -0.302508569 | -0.188111077 | -0.131947864 | 0.000377602  |
| ENSDART00000018625 | napab             | 0.495528529  | 0.395594582  | 0.072464634  | -0.31666363  |
| ENSDART00000018654 | rnd1b             | -0.711104866 | -0.668463449 | -0.311306501 | -0.458881777 |
| ENSDART00000018676 | cyp3c1            | 0.69067592   | 0.432985427  | -0.038151099 | -0.472952311 |
| ENSDART00000018685 | syt9a             | 0.383050894  | 0.997731574  | 0.678563906  | 0.37205351   |
| ENSDART00000018686 | rrp15             | 0.358996202  | 0.261032346  | 0.197604486  | -0.018179208 |
| ENSDART00000018735 | dnaja2l           | -0.20745831  | 0.012628814  | 0.350147509  | 0.311991137  |
| ENSDART00000018743 | phf20a            | 0.312029532  | 0.419745206  | 0.325238046  | 0.318832686  |
| ENSDART00000018792 | spag7             | -0.393898515 | -0.535366384 | -0.519915196 | -0.305218132 |
| ENSDART00000018886 | ghra              | -0.12746236  | -0.080311259 | -0.403757478 | -0.551820215 |
| ENSDART00000018945 | meis3             | -0.263611366 | 0.389783427  | 1.01804147   | 0.898863275  |
| ENSDART00000018972 | zgc:92818         | 0.012004445  | -0.040419062 | -0.784852086 | -0.38349701  |
| ENSDART00000019003 | psmd10            | 0.510870261  | 0.455922769  | 0.143258659  | 0.040691699  |
| ENSDART00000019029 | atp6v1h           | -0.249435289 | -0.255917009 | -0.243059404 | -0.047539915 |
| ENSDART00000019045 | ebp               | -0.186359255 | 0.947675675  | 1.363611199  | 0.55228711   |
| ENSDART00000019053 | faima             | -0.147906168 | -0.161120397 | -0.359996788 | -0.164587924 |
| ENSDART00000019140 | rorab             | -0.499015892 | -0.249117065 | -0.271786747 | 0.004902877  |



|                    |                 |              |              |              |              |
|--------------------|-----------------|--------------|--------------|--------------|--------------|
| ENSDART00000019149 | rpl7            | 0.429749031  | 0.41708455   | 0.235093103  | -0.015027688 |
| ENSDART00000019165 | apaf1           | 0.51528421   | 0.965000853  | 0.888709667  | 0.68935409   |
| ENSDART00000019199 | rab39ba         | -0.125963686 | 0.3041991    | 0.44382958   | 0.206562916  |
| ENSDART00000019294 | si:dkeyp-75b4.9 | -0.789027106 | -0.841731007 | -0.221050872 | 0.359721563  |
| ENSDART00000019330 | ech1            | 0.344696401  | 0.425292318  | -0.031478205 | -0.016576624 |
| ENSDART00000019521 | dip2ba          | 0.352814519  | 0.501689217  | 0.539560646  | 0.272762208  |
| ENSDART00000019573 | zgc:65894       | -0.648921378 | -0.373996254 | 0.357740851  | 0.502243837  |
| ENSDART00000019595 |                 | -2.247733873 | -0.556417246 | -3.574262962 | -0.309310232 |
| ENSDART00000019617 | rsad2           | -0.056061565 | -0.489318095 | 2.739834278  | -0.378754222 |
| ENSDART00000019647 | psmc2           | 0.088369453  | 0.252149794  | 0.191509771  | 0.022895546  |
| ENSDART00000019658 | nacad           | -0.254606168 | 0.44010123   | 0.744298293  | 0.29398429   |
| ENSDART00000019698 | anxa5b          | 1.162500386  | 1.67744918   | 1.46667303   | 0.432101083  |
| ENSDART00000019706 | phc2b           | -0.309131033 | 0.04672236   | 0.268644424  | 0.076203283  |
| ENSDART00000019748 | lin7a           | -0.334365216 | -0.254636287 | -0.400398823 | -0.216397551 |
| ENSDART00000019750 | wdr5            | 0.151689533  | 0.300718903  | 0.396766724  | 0.199844693  |
| ENSDART00000019766 | tgfb3           | -0.14127581  | -0.182290633 | -0.363811528 | -0.271524635 |
| ENSDART00000019770 | gpm6ba          | -0.26452505  | -0.240754685 | -0.112562472 | 0.004364713  |
| ENSDART00000019818 | ric8b           | 0.219425238  | 0.304273846  | 0.411142498  | 0.146708414  |
| ENSDART00000019905 | fncl4b          | -0.870561937 | -0.746602431 | -0.973680622 | -0.402474596 |
| ENSDART00000019907 | unc119.1        | -0.258282731 | -0.126927399 | -0.208777989 | -0.147908262 |
| ENSDART00000019925 | GNB4            | 0.24039241   | 0.43881347   | 0.966289057  | 1.074168682  |
| ENSDART00000019936 | prkacab         | -0.083728046 | -0.043118374 | 0.244894467  | 0.164419526  |
| ENSDART00000019937 | gadd45ga        | 0.98351774   | 1.304995817  | 0.165178221  | 0.462881948  |
| ENSDART00000019949 | ndrg2           | -0.366275522 | -0.294111898 | -0.252300979 | -0.169375948 |
| ENSDART00000020017 | aldh3b1         | 0.019655473  | 0.632122683  | 0.647018435  | 0.316141972  |
| ENSDART00000020048 | gsna            | 0.451913636  | 0.79824491   | 0.782008443  | 0.357949724  |
| ENSDART00000020054 | opcml           | -0.412711216 | -0.540582472 | -0.347997034 | -0.057254512 |
| ENSDART00000020084 | hsp90ab1        | 0.266636397  | 0.434039186  | 0.537534154  | 0.384889667  |
| ENSDART00000020096 | fgf13b          | -3.880462854 | -2.396384616 | -1.469971299 | 0.217849124  |
| ENSDART00000020122 | ywhah           | -0.243048068 | -0.041853394 | 0.44002204   | 0.422069749  |
| ENSDART00000020153 | adck3           | -0.178069281 | -0.150101974 | -0.272732357 | -0.02457601  |
| ENSDART00000020167 | slc16a9a        | 0.895506163  | 0.735954298  | 0.591907512  | -0.466816888 |
| ENSDART00000020168 | kctd5a          | 0.075119561  | 0.1276866    | 0.301730152  | 0.250326391  |
| ENSDART00000020174 | dynll2b         | -0.376289244 | -0.003912141 | -0.039237308 | 0.00732876   |
| ENSDART00000020183 | fam102bb        | -0.149766416 | -0.311804442 | -0.169646826 | -0.06993891  |
| ENSDART00000020249 | dusp5           | -0.842223428 | -0.88819591  | -1.001072274 | -0.721604289 |
| ENSDART00000020252 | pdia6           | 0.374033372  | 0.009098395  | 0.091775115  | 0.023604955  |
| ENSDART00000020256 | lgsn            | 1.361702081  | 2.686172063  | 1.394569806  | 0.349584846  |
| ENSDART00000020296 | nadl1.2         | -0.369828112 | -0.124790776 | 0.28925914   | 0.362042383  |
| ENSDART00000020311 | rpl27           | 0.430086554  | 0.381494789  | 0.182914397  | -0.034120883 |
| ENSDART00000020342 | sgsm3           | -0.132410481 | -0.068536613 | 0.176019735  | 0.283913195  |
| ENSDART00000020497 | snx13           | -0.143691651 | -0.273195754 | -0.089112423 | 0.016117988  |
| ENSDART00000020541 | lipf            | 0.528006329  | 0.723139512  | 0.390796686  | -0.03933789  |
| ENSDART00000020569 | creld1b         | -0.396401062 | -0.06913614  | 0.015512001  | 0.011512871  |
| ENSDART00000020621 | mapk4           | -0.137443479 | 0.345820304  | 0.800085717  | 0.474998646  |
| ENSDART00000020638 | rcan1a          | 0.548382891  | 0.378475469  | 0.383543152  | 0.544764217  |
| ENSDART00000020646 | chrn1b          | 0.963286522  | 0.623965705  | 0.291783612  | 0.576118226  |
| ENSDART00000020655 | psma5           | 0.424960543  | 0.53028483   | 0.342202642  | 0.090736505  |
| ENSDART00000020665 | sgtb            | -0.247959729 | -0.080915193 | -0.275270124 | -0.210502305 |
| ENSDART00000020741 | aldoaa          | -0.416493866 | -0.444493146 | -0.351916406 | -0.154405211 |
| ENSDART00000020810 | sdcbp2          | 0.429533724  | 0.242026939  | 0.181097661  | -0.126536592 |

|                    |                   |              |              |              |              |
|--------------------|-------------------|--------------|--------------|--------------|--------------|
| ENSDART00000020824 | pank1b            | 0.041844369  | 0.140368278  | 0.263424196  | 0.005383312  |
| ENSDART00000020908 | zc4h2             | -0.133072632 | 0.229085423  | 0.337553441  | 0.264734015  |
| ENSDART00000020970 | pgm2              | 0.182379442  | 0.224260514  | 0.427220163  | 0.369397058  |
| ENSDART00000020999 | angptl1a          | -0.447558553 | -0.389827093 | -0.516507166 | -1.101603289 |
| ENSDART00000021037 | hspa4a            | 0.42074258   | 0.381012047  | 0.243421438  | 0.132816774  |
| ENSDART00000021062 | slc9a8            | 0.308335488  | -0.627436336 | -3.684031993 | -1.491743311 |
| ENSDART00000021069 | rpl38             | 0.561397297  | 0.414839383  | 0.25425723   | 0.049186317  |
| ENSDART00000021083 | calm2a            | -0.300457039 | -0.171937069 | 0.044961812  | 0.17764614   |
| ENSDART00000021092 | snx27b            | -0.196827884 | -0.228935762 | -0.254873921 | -0.135355059 |
| ENSDART00000021121 | stx5al            | -0.079551416 | -0.239231712 | -0.554538789 | -0.564757113 |
| ENSDART00000021168 | rxrga             | 0.040179684  | -0.194377683 | -0.381512289 | -0.377392107 |
| ENSDART00000021213 | cpne2             | -0.275625296 | -0.394159316 | -0.352439432 | -0.230978713 |
| ENSDART00000021231 | slmapb            | -0.557559725 | -0.496297491 | -0.195575587 | 0.049672527  |
| ENSDART00000021260 | sept8b            | -0.246039495 | -0.120094514 | -0.518439508 | -0.250786208 |
| ENSDART00000021299 | nmd3              | 0.353895501  | 0.176055483  | 0.10015969   | 0.031379837  |
| ENSDART00000021341 | kif3ca            | 0.127548246  | 0.488322423  | 0.730937873  | 0.492487971  |
| ENSDART00000021346 | arl3l2            | -0.339022452 | -0.304754125 | -0.490852638 | -0.247921956 |
| ENSDART00000021417 | p2rx3a            | 0.048222852  | -0.166951272 | -1.130394212 | -0.103958246 |
| ENSDART00000021491 | csnk1db           | -0.098564588 | -0.355768317 | -0.198945325 | -0.067100917 |
| ENSDART00000021559 | coro1b            | 0.006396016  | -0.122229179 | -0.278308819 | -0.121710131 |
| ENSDART00000021596 | rxrb              | -0.183103481 | -0.256930789 | -0.18551154  | -0.16195495  |
| ENSDART00000021604 | gins4             | 0.598069286  | 0.116671159  | -0.218567942 | -0.173827642 |
| ENSDART00000021605 | LRRC4C            | -0.456880748 | -0.587108705 | -0.299621227 | -0.131466817 |
| ENSDART00000021609 | gad2              | -0.376538118 | -0.375877531 | -0.287892544 | -0.231277899 |
| ENSDART00000021666 | rtca              | 0.450183742  | 0.82121323   | 0.721903733  | 0.20677388   |
| ENSDART00000021693 | ank2a             | 0.088061869  | 0.283890991  | 0.488712819  | 0.41975176   |
| ENSDART00000021788 | pbk               | 1.438031033  | 0.973567544  | 0.667760742  | 0.195406357  |
| ENSDART00000021798 | fabp11a           | 3.578286828  | 1.692122399  | 1.073895347  | -0.266988673 |
| ENSDART00000021950 | methfd1b          | 1.089156306  | 0.599589593  | 0.18588711   | -0.096895618 |
| ENSDART00000021976 | nsa2              | 0.087749249  | 0.255476165  | 0.234966715  | 0.01893274   |
| ENSDART00000022010 | hivep2b           | -0.404683257 | -0.428225913 | -0.085969125 | 0.061919909  |
| ENSDART00000022042 | scn8aa            | -0.64882134  | -0.631929626 | 0.169338069  | 0.591046475  |
| ENSDART00000022044 | dct               | 0.864997441  | 0.322109214  | -0.10561397  | -0.63566776  |
| ENSDART00000022051 | gins1             | -0.049060202 | -0.07395231  | -0.409999594 | -0.285702931 |
| ENSDART00000022060 | atf3              | 2.958540036  | 3.348918067  | 2.852908333  | 1.811501419  |
| ENSDART00000022270 | arhgap33          | 0.060975731  | 0.144058893  | 0.360327899  | 0.271763038  |
| ENSDART00000022290 | mdh1aa            | -0.386096556 | -0.387245145 | -0.361974171 | -0.162628891 |
| ENSDART00000022307 | atic              | 1.012801143  | 0.518350872  | 0.289570342  | -0.11925608  |
| ENSDART00000022356 | ppp1r7            | -0.289189989 | -0.228515822 | -0.279744824 | -0.100278848 |
| ENSDART00000022393 | si:dkeyp-57f11.2  | 0.163453067  | -0.122007101 | -0.459561011 | 0.032532197  |
| ENSDART00000022499 | psmb3             | 0.223119041  | 0.273754026  | 0.150624654  | -0.009410181 |
| ENSDART00000022533 | kcnj2a            | -0.207812042 | -0.209993339 | -0.395014972 | -1.14439113  |
| ENSDART00000022549 | atp1b3a           | -0.438514495 | -0.341784188 | -0.389598734 | -0.186751495 |
| ENSDART00000022562 | rhogb             | 0.97771224   | 0.454579503  | 0.287206454  | -0.277565993 |
| ENSDART00000022579 | GABRG3            | -0.524427233 | -0.895243712 | -0.602147004 | -0.152848624 |
| ENSDART00000022581 | rab22a            | -0.072513798 | -0.08434934  | -0.299709625 | -0.230388715 |
| ENSDART00000022586 | lrrc40            | 0.466457292  | 0.391920358  | 0.288821604  | -0.015697706 |
| ENSDART00000022625 | nrarpb            | -0.295040721 | -0.303522559 | -0.284578601 | -0.228026779 |
| ENSDART00000022634 | acp2              | 0.356430058  | 0.295051752  | 0.030540215  | -0.026401831 |
| ENSDART00000022646 | cnot4b            | 0.11528648   | 0.170971297  | 0.271245163  | 0.121803983  |
| ENSDART00000022660 | si:ch211-195b15.7 | -0.190059614 | -0.249688476 | -0.324813294 | -0.157998073 |

|                    |                  |              |              |              |              |
|--------------------|------------------|--------------|--------------|--------------|--------------|
| ENSDART00000022663 |                  | -0.241007108 | -3.679203505 | -0.288618865 | -1.771039097 |
| ENSDART00000022688 | tob1b            | -0.393522131 | -0.302261171 | -0.612204875 | -0.372656833 |
| ENSDART00000022694 | ehd3             | -0.278899876 | -0.241188601 | -0.097281852 | -0.017987416 |
| ENSDART00000022729 | unm_sa808        | -0.546569433 | -0.564171517 | -0.267551607 | 0.046437921  |
| ENSDART00000022765 | riok1            | 0.429965951  | 0.477495547  | 0.301061387  | 0.021181676  |
| ENSDART00000022768 | ak5              | -0.529999471 | -0.599207091 | -0.317508372 | 0.131326788  |
| ENSDART00000022866 | pisd             | -0.555411298 | -0.214837183 | -0.086260422 | -0.186182517 |
| ENSDART00000022909 | klhl18           | -0.153412936 | 0.073357396  | 0.397749012  | 0.249762723  |
| ENSDART00000022963 | cdc14aa          | -0.366168568 | -0.36782201  | -0.106140735 | 0.082726559  |
| ENSDART00000022976 | kctd16b          | -0.982447595 | -1.281976718 | -0.566394426 | 0.110166911  |
| ENSDART00000022998 | ANO2 (1 of many) | 0.005158406  | -0.146342409 | -0.548931715 | -0.196350546 |
| ENSDART00000023038 | dacha            | -0.511894205 | -0.418991667 | -0.004522839 | 0.112876213  |
| ENSDART00000023054 | at13             | 0.317687991  | 0.347306029  | 0.121176286  | -0.186993768 |
| ENSDART00000023089 | acadvl           | 0.315023187  | 0.311610409  | 0.17259027   | -0.0260318   |
| ENSDART00000023123 | nup88            | 0.221684741  | 0.406336851  | 0.406160624  | 0.250704697  |
| ENSDART00000023156 | eef1a1l2         | 0.512554224  | 0.741741761  | 0.709552788  | 0.28897731   |
| ENSDART00000023206 | plk2b            | -0.591714767 | -0.133232909 | -0.517936071 | -0.57159861  |
| ENSDART00000023210 | trim13           | -0.37704188  | -0.363410115 | -0.204332616 | 0.075535016  |
| ENSDART00000023278 | fads2            | -0.280275959 | 0.609167416  | 1.126645574  | 0.470269511  |
| ENSDART00000023463 | uap1l1           | 0.706648736  | 0.512468414  | 0.225773419  | -0.015907861 |
| ENSDART00000023509 | ska2             | -0.036357965 | -0.092147723 | -0.294463498 | -0.176013793 |
| ENSDART00000023547 | anxa11b          | 0.050301812  | -0.087626764 | -0.004152721 | -0.398004466 |
| ENSDART00000023550 | hsp90aa1.2       | -0.115909172 | -0.134363979 | -0.322775345 | -0.097362577 |
| ENSDART00000023562 | CABZ01041610.1   | -1.012987922 | -1.132303657 | -0.526387248 | -0.210938966 |
| ENSDART00000023588 | guca1a           | 0.527717677  | -0.52699324  | -1.299472888 | -0.244316084 |
| ENSDART00000023613 | her6             | -0.335042933 | -0.234567638 | -0.250120727 | -0.59712361  |
| ENSDART00000023686 | ankrd33ab        | -0.23872945  | -0.400254403 | -1.062972805 | -0.551724897 |
| ENSDART00000023709 | ptp4a2b          | 0.271575512  | 0.562448581  | 0.634906429  | 0.086969331  |
| ENSDART00000023763 | wdcp             | -0.038191062 | -0.371104976 | -0.391285873 | -0.034783387 |
| ENSDART00000023779 | vcp              | 0.230561184  | 0.246570266  | 0.325389872  | 0.137878127  |
| ENSDART00000023806 | zgc:110319       | -0.195130618 | -0.122813174 | -0.337219496 | -0.098833156 |
| ENSDART00000023831 | cry5             | -0.290776024 | 0.507969364  | -0.405324234 | -0.228415974 |
| ENSDART00000023833 | eif2s3           | 0.172990624  | 0.349255612  | 0.311895175  | 0.045890851  |
| ENSDART00000023926 | eif3eb           | -0.055777547 | -0.145564801 | -0.286794414 | -0.128155341 |
| ENSDART00000023944 | lmnl3            | -0.134674249 | 0.538751787  | 0.920098245  | 0.528719758  |
| ENSDART00000023959 | arntl1a          | 0.340904931  | 1.030627189  | 1.45255612   | 0.975945139  |
| ENSDART00000024034 | gpsm2            | 0.06632826   | -0.389217225 | -0.522197566 | -0.062079955 |
| ENSDART00000024082 | psmb6            | 0.195043333  | 0.259353241  | 0.359595812  | 0.192042468  |
| ENSDART00000024135 | tubb2            | -0.097026879 | 1.085064176  | 1.27895467   | 1.027950073  |
| ENSDART00000024136 | gngt2a           | 0.175894019  | 0.078473268  | -0.788482627 | -0.299650763 |
| ENSDART00000024194 | kif11            | 1.409119378  | 1.269759488  | 0.810392576  | 0.401186663  |
| ENSDART00000024208 | nutf2l           | 0.951686549  | 0.855710394  | 0.537014601  | -0.220899011 |
| ENSDART00000024287 | zgc:165604       | -0.009089907 | -0.228105246 | -0.581619742 | -0.405549266 |
| ENSDART00000024296 | egln1b           | -0.145407238 | -0.296649941 | -0.383343901 | -0.196291651 |
| ENSDART00000024304 | per3             | -0.478794008 | -0.23341732  | -0.352073188 | -0.024889246 |
| ENSDART00000024309 | rb1              | 0.736743325  | 0.968558289  | 0.720111001  | 0.238176467  |
| ENSDART00000024313 | rnf150b          | -0.152451949 | -0.254343985 | -0.250476516 | -0.120482055 |
| ENSDART00000024316 | mcm5             | 1.292009744  | 0.913737369  | 0.774968175  | 0.275487022  |
| ENSDART00000024320 | ybx1             | 0.257630768  | 0.252218726  | 0.414084055  | 0.18414263   |
| ENSDART00000024328 | slc34a2a         | -1.294382652 | -0.588426598 | -0.664087867 | -1.114341851 |
| ENSDART00000024331 | glsb             | 0.029280722  | -0.254060441 | -0.66092512  | -0.487127171 |

|                    |                      |              |              |              |              |
|--------------------|----------------------|--------------|--------------|--------------|--------------|
| ENSDART00000024354 | csad                 | 0.826762252  | 0.889896753  | 0.709970739  | 0.637298928  |
| ENSDART00000024415 | epas1a               | 0.419060345  | 0.571698023  | 0.827681076  | -0.059626191 |
| ENSDART00000024528 | emc7                 | -0.102957427 | -0.142334415 | -0.248955976 | -0.189343286 |
| ENSDART00000024615 | rnpepl1              | 0.274953884  | 0.219791217  | 0.571525784  | 0.173823915  |
| ENSDART00000024619 | gorasp1a             | -0.145027203 | -0.174354089 | -0.499227113 | -0.186036756 |
| ENSDART00000024662 | plppr3a              | 1.050789931  | 1.738581828  | 1.609411361  | 1.082826483  |
| ENSDART00000024720 | si:ch211-282j22.3    | 0.265772408  | 0.220333711  | 0.187153701  | 0.074808124  |
| ENSDART00000024778 | robo3                | -0.327155095 | -0.251732012 | -0.124129181 | 0.058627004  |
| ENSDART00000024832 | stat5a               | -0.212236095 | -0.408877789 | -0.375060924 | -0.185569558 |
| ENSDART00000024858 | chchd10              | -0.331794878 | -0.431239071 | -0.4916218   | -0.229989739 |
| ENSDART00000024872 | creb3l3l             | 0.316205692  | 0.628018553  | 0.525420097  | 0.254183225  |
| ENSDART00000025031 | pou4f1               | -0.37458842  | -0.169318799 | 0.774588614  | 1.160187758  |
| ENSDART00000025046 | ppp1caa              | 0.04938914   | -0.175273742 | -0.396680839 | -0.049267892 |
| ENSDART00000025096 | larp1b               | 0.593217694  | 0.576647108  | 0.472990072  | 0.196836578  |
| ENSDART00000025198 | mettl21a             | -0.380455489 | -0.566803653 | -0.570464602 | -0.564292758 |
| ENSDART00000025229 | adi1                 | 0.582007509  | 0.274560712  | -0.200617197 | -0.21352575  |
| ENSDART00000025256 | igfbp2b              | -0.742463234 | -0.107964006 | 0.616733017  | 0.74050304   |
| ENSDART00000025326 | csnk1da              | -0.048665312 | -0.227600133 | -0.273972646 | -0.14458728  |
| ENSDART00000025385 | cers2a               | 0.59368354   | 0.657003513  | 0.583941604  | 0.192392368  |
| ENSDART00000025414 | slc2a1a              | 0.059681786  | -0.155207235 | -0.469818878 | -0.137194664 |
| ENSDART00000025466 | slc18a2              | -0.576881609 | -0.281211576 | -0.258781682 | -0.379077041 |
| ENSDART00000025487 | icmt                 | -0.205683018 | -0.185657781 | -0.262148423 | -0.151909752 |
| ENSDART00000025494 | hprt1l               | -0.364550689 | -0.385937863 | -0.083973479 | -0.129534044 |
| ENSDART00000025496 | rras                 | 0.483455604  | 0.817924325  | 0.502791397  | -0.193021858 |
| ENSDART00000025501 | snap23.1             | 0.353906863  | 0.265231797  | -0.028292671 | -0.317654401 |
| ENSDART00000025535 | sept5a               | 0.521581645  | 1.371610673  | 0.945407012  | 0.566204111  |
| ENSDART00000025550 | top1mt               | 0.816108961  | 1.133963099  | 0.883225094  | 0.407533529  |
| ENSDART00000025573 | CABZ01071723.1       | -0.48632791  | -0.607491421 | -0.117657015 | 0.102596694  |
| ENSDART00000025583 | fgf8a                | -0.058331217 | -0.819626176 | 0.05604093   | 0.237151994  |
| ENSDART00000025620 | ppiaa                | 0.369681961  | 0.563046067  | 0.555154111  | 0.174901331  |
| ENSDART00000025698 | zgc:153311           | -0.134647599 | -0.156342149 | -0.388760407 | -1.773822225 |
| ENSDART00000025782 | nup93                | 0.17632244   | 0.241668195  | 0.293793434  | 0.152368608  |
| ENSDART00000025852 | tnni2b.1             | -0.577234038 | 4.833234821  | 5.215670785  | 3.899605393  |
| ENSDART00000025860 | si:dkey-247m21.3     | 0.550902269  | 0.531374836  | -0.221903085 | -0.681264404 |
| ENSDART00000025877 | cldn12               | -0.148592994 | -0.140436414 | -0.371702065 | -0.263635262 |
| ENSDART00000025912 | si:dkey-32n7.4       | 0.676729111  | 0.251567535  | 0.290364244  | 0.056388056  |
| ENSDART00000025962 | gyg1a                | -0.132586486 | -0.231554909 | -0.320101499 | -0.261622046 |
| ENSDART00000025997 | dip2cb               | -0.352423277 | -0.192868324 | 0.083423296  | 0.161945092  |
| ENSDART00000026085 | ptges                | -0.133597623 | -0.186036004 | -0.449634161 | -0.455296325 |
| ENSDART00000026145 | AMOTL1               | 1.0586494    | 0.570711762  | 0.741896115  | 0.335943589  |
| ENSDART00000026152 | asap2a               | -0.416411014 | -0.084267369 | -0.025927141 | 0.001189582  |
| ENSDART00000026174 | dgkh                 | -0.6307495   | -1.007774241 | -0.588261808 | -0.107017931 |
| ENSDART00000026178 | kif4                 | 0.630775369  | 0.400037801  | 0.195646982  | 0.069714171  |
| ENSDART00000026180 | fabp7a               | 0.745585804  | 2.003621538  | 1.857780253  | 1.020257385  |
| ENSDART00000026303 | rasd1                | -0.723056439 | -0.693453912 | -0.473472236 | -0.755311511 |
| ENSDART00000026316 | sema3gb              | -0.148485986 | -0.183297493 | -0.3621349   | -0.465943338 |
| ENSDART00000026339 | gtppb4               | 0.113641949  | 0.327640711  | 0.222548232  | 0.071359586  |
| ENSDART00000026378 | slc25a6              | -0.475274891 | -0.471356749 | -0.229323143 | 0.038491163  |
| ENSDART00000026401 | TMEM178B (1 of many) | -0.387053719 | -0.214500403 | -0.049460199 | 0.011667684  |
| ENSDART00000026409 | cct4                 | 0.459151422  | 0.538338734  | 0.621039126  | 0.313903974  |
| ENSDART00000026492 | flnbc                | 1.767414623  | 1.156524725  | 0.931280558  | 0.481368808  |

|                    |                  |              |              |              |              |
|--------------------|------------------|--------------|--------------|--------------|--------------|
| ENSDART00000026692 | ubtd1a           | -0.10869502  | -0.342281946 | -0.985605367 | -0.704345293 |
| ENSDART00000026765 | slc18a3a         | -0.342520426 | -0.454539851 | -0.359489571 | -0.310297658 |
| ENSDART00000026766 | aldocb           | -0.483629021 | -0.540701781 | -0.406696036 | -0.135568984 |
| ENSDART00000026800 | kifap3b          | 0.203180282  | 0.588115089  | 0.640508934  | 0.450843691  |
| ENSDART00000026814 | ptp4a1           | 0.419787699  | 0.591512581  | 0.636748721  | 0.300535035  |
| ENSDART00000026865 | l3mbtl1a         | -0.339631378 | -0.338161449 | -0.153879513 | -0.055902641 |
| ENSDART00000026924 | dnah7            | -0.347974455 | -0.178245432 | -0.682598609 | -0.174885691 |
| ENSDART00000026992 | sox4a            | 0.168735758  | 0.553498244  | 0.871364123  | 0.630648218  |
| ENSDART00000027050 | cnga3b           | -0.139313288 | -0.277577971 | -1.175814494 | -0.697938349 |
| ENSDART00000027115 | nob1             | -0.149963351 | -0.185404709 | -0.224057031 | -0.30485959  |
| ENSDART00000027158 | psmd3            | 0.079773681  | 0.202742016  | 0.46801517   | 0.212038089  |
| ENSDART00000027274 | efna3a           | -0.422282495 | -0.289576322 | -0.118198025 | 0.092530837  |
| ENSDART00000027345 | tmem59l          | -0.559867163 | -0.384910477 | -0.005343137 | 0.202377241  |
| ENSDART00000027379 | bicral           | 0.180958951  | 0.201052129  | 0.429766407  | 0.252075745  |
| ENSDART00000027393 | ckmt1            | 0.722688207  | 0.598583347  | 0.435615456  | 0.204934783  |
| ENSDART00000027398 | kcna2a           | -1.558634612 | -1.413069345 | -0.244650937 | 0.296687437  |
| ENSDART00000027417 | zgc:171704       | 0.227240571  | -0.665719796 | -1.161293822 | -1.438167938 |
| ENSDART00000027454 | si:ch211-207i1.2 | -0.470697042 | -0.923472632 | -1.21436549  | -0.514660002 |
| ENSDART00000027463 | hmx4             | -0.340009377 | -0.236809718 | -0.106768059 | 0.00156649   |
| ENSDART00000027465 | cacna2d4b        | -0.370016882 | -0.141565087 | -0.247577188 | 0.068079685  |
| ENSDART00000027466 | fam63b           | -0.160774327 | 0.127626681  | 0.377768257  | 0.305765252  |
| ENSDART00000027532 | mapkapk2a        | -0.086338753 | -0.192582349 | -0.252851985 | -0.027631364 |
| ENSDART00000027598 | tpm3             | 0.692886998  | 2.316316343  | 2.715886041  | 1.570432549  |
| ENSDART00000027616 | eif4g2a          | 0.333990776  | 0.435258045  | 0.644700731  | 0.350291836  |
| ENSDART00000027689 | amph             | -0.260662658 | -0.30969295  | -0.237665092 | 0.01178982   |
| ENSDART00000027718 | fxr2             | 0.070260526  | 0.251047986  | 0.370057736  | 0.114198992  |
| ENSDART00000027758 | rtn1b            | -0.626628578 | 0.207141964  | 0.617559397  | 0.433726227  |
| ENSDART00000027957 | hmgcl            | -0.03513095  | -0.160364915 | -0.261992968 | -0.251204537 |
| ENSDART00000028003 | ankrd22          | 0.462762131  | 0.494960479  | 0.738379791  | 0.088098985  |
| ENSDART00000028033 | emc8             | -0.03555204  | -0.206564635 | -0.268269465 | -0.211006035 |
| ENSDART00000028048 | necap1           | -0.117195999 | -0.341344035 | -0.478671947 | -0.252467934 |
| ENSDART00000028090 | eif2ak1          | 0.218229206  | 0.400243646  | 0.398265404  | 0.179590234  |
| ENSDART00000028108 | ddc              | -0.192852254 | -0.317464474 | -0.303298772 | 0.040886808  |
| ENSDART00000028219 | pvalb4           | -1.549055704 | 2.87360786   | 4.516864647  | 3.395003162  |
| ENSDART00000028225 | mao              | -0.257909806 | -0.164169194 | -0.255680521 | -0.167259868 |
| ENSDART00000028285 | pgbd5            | -0.471148265 | -0.169774685 | 0.263561856  | 0.22277577   |
| ENSDART00000028338 | scamp5a          | -0.358452184 | -0.354788931 | -0.092970627 | 0.058203665  |
| ENSDART00000028390 | fgf12a           | -0.792701948 | -0.713373555 | -0.153423419 | 0.185286633  |
| ENSDART00000028417 | lrit2            | -0.281592969 | -0.383251603 | -0.165960328 | 0.039848719  |
| ENSDART00000028500 | nxn              | -0.356492001 | -0.304319321 | -0.337794036 | -0.002781587 |
| ENSDART00000028607 | chd6             | 0.00488027   | -0.079639497 | 0.533277243  | 0.378096362  |
| ENSDART00000028787 | ahr1b            | -0.27962376  | -0.18218298  | -0.129040126 | 0.07690852   |
| ENSDART00000028883 | gna13b           | 0.442397382  | 0.38652983   | 0.274274635  | -0.034947864 |
| ENSDART00000028895 | negr1            | -0.362135851 | -0.256191375 | -0.15121136  | -0.084875523 |
| ENSDART00000028946 | tpd52l2a         | 0.038391394  | -0.134825728 | -0.275007322 | -0.131471646 |
| ENSDART00000028960 | ndufa2           | -0.147139307 | -0.190704061 | -0.363806149 | -0.139491855 |
| ENSDART00000028997 | myo9ab           | 0.179745305  | 0.101321956  | 0.280102899  | 0.331620625  |
| ENSDART00000029121 | usp5             | 0.186533139  | 0.264124698  | 0.696851044  | 0.548402162  |
| ENSDART00000029133 | snu13b           | 0.760760317  | 0.56984098   | 0.429270049  | -0.029914173 |
| ENSDART00000029380 | bnip4            | 0.50246171   | 0.517948631  | -0.062532971 | -0.337429982 |
| ENSDART00000029387 | ppan             | 0.365110957  | 0.289310564  | 0.234072786  | 0.008675203  |

|                    |                   |              |              |              |              |
|--------------------|-------------------|--------------|--------------|--------------|--------------|
| ENSDART00000029457 | sh2d3ca           | -0.605491696 | -0.301886794 | 0.051143961  | 0.055429229  |
| ENSDART00000029459 | gipr              | -0.120368109 | -0.334116608 | -0.559985722 | -0.423861096 |
| ENSDART00000029492 | cmtm7             | 0.705299486  | 0.845221281  | 0.768474344  | -0.28587683  |
| ENSDART00000029528 | mospd2            | 0.309594516  | 0.158328804  | 0.007644114  | -0.042795417 |
| ENSDART00000029646 | rplp1             | 0.363694976  | 0.319088557  | 0.167660064  | 0.013197371  |
| ENSDART00000029703 | kcnh1a            | -0.531746722 | -1.366001544 | -0.565478925 | 0.09193536   |
| ENSDART00000029774 | tmem55bb          | -0.03621571  | -0.196356812 | -0.337053328 | -0.094153869 |
| ENSDART00000029843 | vezf1a            | 0.660507751  | 0.776194217  | 0.884683465  | 0.428803142  |
| ENSDART00000029946 | ube2b             | -0.262228145 | -0.117966704 | -0.377845713 | -0.176574464 |
| ENSDART00000029981 | ppp3cb            | -0.453839737 | -0.543662557 | -0.385030051 | 0.007551117  |
| ENSDART00000030125 | znhit3            | 0.760210037  | 0.691966223  | 0.487369205  | 0.388320697  |
| ENSDART00000030205 | bnip3lb           | 0.087436849  | 0.295010863  | 0.335325724  | 0.120618456  |
| ENSDART00000030211 | gmfb              | -0.040702268 | 0.286017295  | 0.157496122  | 0.031502906  |
| ENSDART00000030213 | mapk1             | 0.367982033  | 0.335025068  | 0.254642258  | -0.112923758 |
| ENSDART00000030409 | asap1b            | -0.387126717 | -0.32480613  | -0.179905202 | -0.016544261 |
| ENSDART00000030509 | glra4a            | -0.54562871  | -0.440353116 | -0.570533638 | -0.182903567 |
| ENSDART00000030579 | crhbp             | 0.109353477  | -0.053663997 | -0.382440888 | -0.742296052 |
| ENSDART00000030691 | cltc4             | 0.290171682  | 0.490608957  | 0.279069846  | 0.046035564  |
| ENSDART00000030773 | foxo3a            | -0.522674186 | -0.346284342 | -0.025883071 | 0.086783781  |
| ENSDART00000030794 | tmem169a          | 0.073168182  | 0.288108809  | 0.520379557  | 0.751344779  |
| ENSDART00000030811 | cables2b          | -0.198257533 | -0.480718843 | -0.449759807 | -0.060172476 |
| ENSDART00000030885 | uckl1a            | 0.183203205  | -0.212616494 | -0.705475026 | -0.013040484 |
| ENSDART00000030887 | slc45a2           | 0.835000405  | 0.559834035  | -0.13177777  | -0.758141187 |
| ENSDART00000030890 | hmox1a            | 2.623035746  | 1.043671484  | 1.096486903  | 0.061370069  |
| ENSDART00000030920 | gid8a             | -0.116648875 | -0.277182294 | -0.355798783 | -0.233597587 |
| ENSDART00000030995 | umps              | 0.416416432  | 0.256033809  | 0.30736318   | -0.006312473 |
| ENSDART00000031047 | cd63              | 1.025048213  | 0.521327717  | 0.067995805  | -0.605090068 |
| ENSDART00000031091 | vsnl1a            | -0.845008079 | -0.77079299  | -0.390375819 | 0.072718281  |
| ENSDART00000031121 | VDAC3 (1 of many) | -0.281245453 | -0.237325849 | -0.158924417 | 0.113945733  |
| ENSDART00000031139 | slc24a4b          | -0.756345109 | -1.188291659 | -0.474432561 | -0.06484409  |
| ENSDART00000031165 | enoph1            | 0.127295774  | 0.248943534  | 0.342353563  | 0.2531466    |
| ENSDART00000031167 | tfap2d            | -0.967562253 | -0.629795841 | 0.638492839  | 1.047009841  |
| ENSDART00000031234 | stxbp2            | 0.406820773  | 0.260992395  | 0.143612276  | -0.234256086 |
| ENSDART00000031265 | rtn4r             | -0.753039937 | -0.836146377 | -0.430012914 | -0.160533624 |
| ENSDART00000031390 | caskin1           | -0.735732711 | -0.907721451 | -0.315045095 | -0.088633322 |
| ENSDART00000031425 | zgc:55582         | -0.13184915  | -0.205452993 | -0.25748443  | -0.094044364 |
| ENSDART00000031426 | skilb             | -0.234186907 | -0.553407151 | -0.565936684 | -0.420869627 |
| ENSDART00000031470 | pafah1b1b         | -0.06625793  | 0.19164974   | 0.422888398  | 0.388967525  |
| ENSDART00000031498 | ccna2             | 1.569664461  | 1.378683751  | 0.895010724  | 0.581055828  |
| ENSDART00000031546 | chrna6            | -0.487671995 | -0.420962215 | 0.210734418  | 0.46609085   |
| ENSDART00000031638 | slc48a1a          | -0.121591299 | -0.156663294 | -0.340136476 | -0.182759405 |
| ENSDART00000031650 | hsp70l            | -0.846526969 | -1.057845455 | -1.357523269 | -1.215078404 |
| ENSDART00000031727 | vamp8             | 0.086516161  | -0.020853386 | -0.34297459  | -0.531441391 |
| ENSDART00000031937 | diras1a           | -0.474540918 | -0.418703997 | -0.179232074 | -0.012563291 |
| ENSDART00000032161 | galnt14           | -0.529482639 | -0.362873656 | -0.264119496 | -0.01842007  |
| ENSDART00000032212 | fynrk             | -0.162448847 | -0.18539887  | -0.276020606 | -0.108651002 |
| ENSDART00000032275 | atp6v1c1a         | -0.172326217 | -0.24874129  | -0.293288363 | -0.174129603 |
| ENSDART00000032290 | esyt1a            | 0.414133861  | 0.186544426  | 0.071532791  | -0.03493067  |
| ENSDART00000032322 | abcg2c            | 0.455571157  | 0.699504596  | 0.641510999  | 0.335341634  |
| ENSDART00000032324 | hddc3             | 0.491004501  | 0.803369277  | 0.623276564  | 0.474326204  |
| ENSDART00000032331 | gmppab            | 0.298836739  | 0.452114759  | 0.362408461  | -0.028707454 |

|                    |                   |              |              |              |              |
|--------------------|-------------------|--------------|--------------|--------------|--------------|
| ENSDART00000032392 | dhdhl             | 0.557297889  | 0.381488116  | 0.091728361  | -0.116661732 |
| ENSDART00000032393 | ginm1             | -0.054454012 | -0.092963972 | -0.327748186 | -0.224389181 |
| ENSDART00000032459 | aqp1a.1           | -0.275584647 | -0.402261221 | -0.531838868 | -0.410567004 |
| ENSDART00000032498 | tspan36           | 1.455763612  | 0.805559086  | 0.192569945  | -0.715366149 |
| ENSDART00000032502 | nebl              | -0.405575453 | -0.348273521 | -0.638746976 | -0.69843843  |
| ENSDART00000032540 | usp14             | 0.236991779  | 0.380670741  | 0.291281165  | 0.061189525  |
| ENSDART00000032547 | lect2l            | 1.708944579  | 1.070031122  | 0.348802096  | -0.787093126 |
| ENSDART00000032603 | tspo              | 0.47255795   | 0.736846252  | 0.52533392   | 0.11686825   |
| ENSDART00000032695 | asic4a            | -0.405928595 | -0.689262684 | -0.527033258 | -0.378352566 |
| ENSDART00000032821 | cyth1b            | 0.161176597  | 0.057433607  | -0.079026086 | -0.299717291 |
| ENSDART00000032844 | plekha6           | -0.171611787 | -0.149520127 | -0.254818235 | 0.001528605  |
| ENSDART00000032857 | mapk11            | 0.353170314  | 0.603154564  | 0.6388701    | 0.458511735  |
| ENSDART00000032899 | clpxa             | -0.125001004 | -0.138480195 | -0.243789891 | -0.138582094 |
| ENSDART00000032963 | apooob            | -0.330795    | -0.271281795 | -0.230754946 | 0.035824011  |
| ENSDART00000033053 | dennd5b           | -0.288493162 | -0.362789161 | -0.132763243 | 0.070545146  |
| ENSDART00000033248 | fam107b           | -0.588148397 | -0.439287754 | -0.362004691 | -0.311865235 |
| ENSDART00000033316 | vangl2            | 0.207091244  | 0.447705982  | 0.579933447  | 0.26125294   |
| ENSDART00000033325 | slc25a24          | -0.429859875 | -0.309149544 | -0.52291133  | -0.286046915 |
| ENSDART00000033361 | ttyh3b            | -0.3186879   | -0.037617104 | 0.269211477  | 0.394612295  |
| ENSDART00000033362 | gatad2b           | -0.40244942  | -0.286045422 | -0.214483951 | -0.084688348 |
| ENSDART00000033386 | ocstamp           | 2.954317372  | 2.548446344  | 2.458244526  | 1.328553982  |
| ENSDART00000033479 | si:ch211-129c21.1 | 1.539581327  | 2.000726167  | 1.978342783  | 1.084446492  |
| ENSDART00000033494 | klf6a             | 1.084550888  | 1.797692613  | 1.625562666  | 0.460444617  |
| ENSDART00000033545 |                   | 0.299034458  | 0.290865093  | 0.474990251  | 0.248453432  |
| ENSDART00000033566 | smad1             | 0.486585209  | 1.249927606  | 1.264727704  | 0.536891999  |
| ENSDART00000033574 | slc24a5           | 0.460212086  | 0.054768672  | -0.306746704 | -1.141417252 |
| ENSDART00000033657 | grm6b             | -0.379593806 | -0.511743403 | -0.159835887 | 0.100793439  |
| ENSDART00000033663 | rps21             | 0.311890725  | 0.366197651  | 0.105076559  | -0.038309008 |
| ENSDART00000033713 | arpc1b            | 0.908662023  | 0.412162066  | 0.131006833  | -0.30826968  |
| ENSDART00000033724 | fabp3             | 0.043357927  | 0.829727862  | 0.980692721  | 0.446444515  |
| ENSDART00000033746 | gins2             | 1.156804675  | 0.565959042  | -0.013280867 | 0.106301442  |
| ENSDART00000033761 | glb1              | 0.347409105  | 0.187375641  | 0.031649312  | 0.073918812  |
| ENSDART00000033980 | lims1             | 0.497849916  | 0.369061975  | 0.247283344  | -0.174205881 |
| ENSDART00000034004 | faf1              | 0.052082526  | 0.093691656  | 0.281166911  | 0.24525998   |
| ENSDART00000034216 | dync1h1           | 0.15631552   | 0.099035755  | 0.755817679  | 0.554910929  |
| ENSDART00000034248 | rab32a            | 0.364170748  | 0.270180665  | -0.161567701 | -0.659765413 |
| ENSDART00000034313 | gas2a             | -0.351038034 | -0.291680692 | -0.523203366 | -0.413177021 |
| ENSDART00000034377 | cpa5              | 2.043914839  | 0.12107472   | 0.19928898   | 0.161423339  |
| ENSDART00000034421 | cdk14             | -0.37810724  | -0.738234108 | -0.33600573  | -0.064327168 |
| ENSDART00000034432 | susd4             | -0.32348116  | 0.086685706  | 0.47906988   | 0.317031782  |
| ENSDART00000034441 | tcp11l2           | 0.020775808  | -0.208761169 | -0.796222831 | -0.248557177 |
| ENSDART00000034523 | tars              | 0.184292328  | 0.408838041  | 0.43347383   | 0.219690833  |
| ENSDART00000034638 | ccdc28a           | -0.059055282 | -0.067802136 | -0.368600818 | -0.274995246 |
| ENSDART00000034705 | ntmt1             | -0.020729663 | -0.187405157 | -0.44452011  | -0.329716724 |
| ENSDART00000034737 | cpne8             | -0.307817154 | -0.810818352 | -0.660194536 | 0.005050706  |
| ENSDART00000034784 | adcyap1b          | 1.680397515  | 2.015053329  | 1.852069794  | 1.09666998   |
| ENSDART00000034790 | pcp4l1            | -0.408039344 | -0.390896541 | -0.213514281 | -0.035791454 |
| ENSDART00000034829 | rrp12             | 0.494057186  | 0.423927766  | 0.372142811  | 0.099318986  |
| ENSDART00000034834 | ppfia2            | -0.326502158 | -0.151128851 | -0.013552631 | 0.061359529  |
| ENSDART00000034849 | grin1b            | -0.325252553 | -0.609188282 | -0.185270574 | 0.122354295  |
| ENSDART00000034850 | dbi               | 1.011739121  | 0.830016329  | 0.708552366  | 0.209278197  |

|                    |            |              |              |              |              |
|--------------------|------------|--------------|--------------|--------------|--------------|
| ENSDART00000034883 | mcf2a      | -0.149015362 | -0.337699782 | -0.173487291 | 0.057006752  |
| ENSDART00000034914 | pvalb3     | -0.375270417 | 3.922610155  | 4.415489459  | 3.238850832  |
| ENSDART00000034935 | desi2      | 0.073850834  | 0.377607475  | 0.427284588  | 0.193399467  |
| ENSDART00000035031 | sgk1       | 0.036456511  | -0.228295468 | -0.323414575 | -0.393803665 |
| ENSDART00000035067 | abhd2a     | -0.280282686 | -0.122469223 | -0.369410687 | -0.218167862 |
| ENSDART00000035093 | col9a2     | 0.360349924  | 0.265960604  | -0.052354611 | -0.707154609 |
| ENSDART00000035150 | spast      | 0.060265858  | 0.143278561  | 0.351254395  | 0.195874089  |
| ENSDART00000035152 | kif26ab    | 0.198116066  | 0.127768449  | 0.42622306   | 0.434736458  |
| ENSDART00000035239 | nek1       | -0.350009624 | -0.188792207 | -0.078432875 | 0.138948692  |
| ENSDART00000035245 | spire2     | 0.223570717  | 0.667119992  | 0.874236758  | 0.626613708  |
| ENSDART00000035409 | zc2hc1a    | 0.100393521  | 0.424633369  | 0.532716266  | 0.492034687  |
| ENSDART00000035447 | mtmr9      | -0.272610717 | -0.235611081 | 0.139540941  | 0.187819723  |
| ENSDART00000035538 | ptp4a3     | -0.088675269 | 0.257809374  | 0.053091443  | -0.336323707 |
| ENSDART00000035628 | srsf10a    | -0.231452965 | -0.136268467 | -0.25871265  | -0.135010634 |
| ENSDART00000035670 | polr2eb    | 0.35113115   | 0.294169174  | 0.063963778  | -0.045691283 |
| ENSDART00000035676 | bnip3la    | -0.292353372 | -0.099807874 | -0.059866968 | -0.067415369 |
| ENSDART00000035710 | lin7c      | -0.082526521 | -0.252501014 | -0.262742844 | -0.186356266 |
| ENSDART00000035737 | slc11a2    | 0.286882779  | 0.187123756  | 0.119307344  | -0.030269778 |
| ENSDART00000035739 | tmem134    | 0.246242014  | 0.369929781  | 0.082611565  | -0.161334554 |
| ENSDART00000035899 | pkp2       | 0.428534184  | 1.016588803  | 1.016153499  | 0.312913104  |
| ENSDART00000035907 | sec24d     | 0.279449898  | 0.329558363  | 0.384805326  | -0.077598974 |
| ENSDART00000035944 | clic5a     | 2.554130845  | 1.311062136  | 1.150965478  | 0.646568675  |
| ENSDART00000036015 | ryr1b      | -0.116788998 | -0.165312146 | 0.372637833  | 0.693396813  |
| ENSDART00000036050 | rs1a       | -0.391328986 | -0.392177441 | -0.469736828 | -0.271292581 |
| ENSDART00000036153 | ccdc3a     | 0.286306507  | 0.061698184  | -0.1803174   | -0.442994145 |
| ENSDART00000036240 | cers4b     | -0.360584189 | -0.184519104 | -0.081616234 | -0.015625515 |
| ENSDART00000036373 | cfap206    | 0.026049802  | 0.014543106  | -0.421468514 | -0.063922477 |
| ENSDART00000036421 | chek2      | 0.623199787  | 0.358982062  | 0.455251589  | 0.098448549  |
| ENSDART00000036472 | zgc:110852 | -0.482143709 | -0.509026678 | -0.613205563 | -0.094495965 |
| ENSDART00000036513 | trib3      | 0.704680301  | 0.933969628  | 0.780405513  | 0.230790744  |
| ENSDART00000036531 | gnai1      | 0.25941591   | 0.265271449  | 0.201009078  | -0.026939111 |
| ENSDART00000036581 | cdk2       | 1.227545183  | 1.116666759  | 0.903071292  | 0.284538183  |
| ENSDART00000036649 | sfxn2      | 0.32661292   | 0.494950572  | 0.442482013  | 0.063629138  |
| ENSDART00000036668 | psmc1a     | 0.311771761  | 0.423109618  | 0.307731242  | 0.107467578  |
| ENSDART00000036680 | ptgr1      | 0.476212613  | 0.619935312  | 0.420689871  | 0.024158985  |
| ENSDART00000036703 | pfdn2      | 0.369409429  | 0.460943577  | 0.431067405  | 0.197162016  |
| ENSDART00000036718 | eif4e1c    | 0.366528838  | 0.391471958  | 0.37708707   | 0.13997088   |
| ENSDART00000036729 | spi1b      | 0.910663058  | 0.717004711  | 0.095052493  | -0.117318513 |
| ENSDART00000036760 | tppp2      | -0.225112914 | 0.608288105  | 0.560408419  | 0.667346525  |
| ENSDART00000036797 | uchl1      | 1.004812771  | 1.916965558  | 1.938952257  | 1.446591845  |
| ENSDART00000036854 | glcci1     | -0.216167779 | -0.276312685 | -0.306037916 | -0.0692944   |
| ENSDART00000036891 | rabac1     | 0.184715811  | 0.277575159  | 0.08241236   | -0.087331685 |
| ENSDART00000036926 | vangl1     | -0.329590873 | -0.033233324 | 0.383553313  | 0.3451937    |
| ENSDART00000036939 | gadd45ba   | 1.15110753   | 1.253886794  | 1.06146692   | 0.82843487   |
| ENSDART00000036997 | camk2n1a   | -0.377223565 | -0.40737699  | -0.242898936 | -0.23919335  |
| ENSDART00000037007 | tpi1a      | -0.595344218 | -0.412573356 | -0.319655345 | -0.136192131 |
| ENSDART00000037036 | cnppd1     | -0.251371332 | -0.185078308 | -0.27690601  | -0.219995028 |
| ENSDART00000037065 | sccpdhb    | -0.135500672 | -0.263394229 | -0.35527789  | -0.147169147 |
| ENSDART00000037109 | srpk1a     | -0.158297297 | -0.128401953 | -0.285156041 | -0.13534624  |
| ENSDART00000037126 | eno2       | -0.315372643 | -0.196767149 | 0.300750061  | 0.433471501  |
| ENSDART00000037195 | kif26bb    | 1.206892082  | 1.55094827   | 1.874551064  | 1.519778039  |



|                    |           |              |              |              |              |
|--------------------|-----------|--------------|--------------|--------------|--------------|
| ENSDART00000037224 | cst14a.2  | 0.549538616  | 0.553010386  | 0.34149596   | -0.057482802 |
| ENSDART00000037265 | olfm1b    | -0.595000689 | -1.108211527 | -0.18099665  | 0.18250463   |
| ENSDART00000037371 | ppp1r13ba | -0.171240808 | -0.158646598 | -0.283609683 | -0.120899195 |
| ENSDART00000037698 | uck2b     | 0.641974401  | 1.119646558  | 1.077673009  | 0.598617402  |
| ENSDART00000037709 | noi11     | 0.254424392  | 0.434300513  | 0.299474854  | 0.102573384  |
| ENSDART00000037846 | focad     | 0.435964232  | 0.512370823  | 0.456134064  | 0.112317494  |
| ENSDART00000037848 | dpp6b     | -0.469010511 | -0.191315433 | -0.026922326 | -0.081540125 |
| ENSDART00000037850 | dync1li2  | 0.268558729  | 0.496891146  | 0.585345447  | 0.309833954  |
| ENSDART00000037879 | crx       | -0.254014844 | -0.310425293 | -0.22793154  | -0.020194538 |
| ENSDART00000037922 | slc6a8    | -0.298142259 | -0.526146924 | -0.491663812 | -0.167137822 |
| ENSDART00000038202 | cndp2     | 1.63370988   | 0.725493655  | 0.197899383  | -0.10985912  |
| ENSDART00000038290 | crhb      | -0.533237668 | -0.584543834 | -0.601107267 | -0.51443145  |
| ENSDART00000038294 | tp53inp1  | -0.610161281 | 0.029061275  | -0.033185195 | -0.028504863 |
| ENSDART00000038301 | gnpda2    | 0.314221876  | 0.240267665  | 0.128522583  | -0.033807169 |
| ENSDART00000038310 | ormdl3    | -0.300841314 | -0.124106092 | -0.535837175 | -0.413488994 |
| ENSDART00000038330 | khsrp     | -0.050330793 | 0.071549867  | 0.273984704  | 0.161173774  |
| ENSDART00000038391 | pkz       | 0.411244814  | 0.129537507  | 1.595328762  | 0.021626224  |
| ENSDART00000038495 | ctnnb1    | 0.20653709   | 0.248644759  | 0.214149858  | 0.090949105  |
| ENSDART00000038505 | rprmb     | -0.046727426 | -0.153123084 | -0.26580673  | 0.05838964   |
| ENSDART00000038648 | ptbp2b    | 0.207623817  | 0.150446749  | 0.253639385  | 0.163738179  |
| ENSDART00000038674 | tmem230a  | -0.312877262 | -0.360088684 | -0.444507782 | -0.485519275 |
| ENSDART00000038696 | flvcr2b   | 1.475160998  | 0.41510575   | 0.393658072  | -0.063620422 |
| ENSDART00000038740 | galnt9    | -0.705450847 | -0.542663541 | -0.098391024 | 0.177029625  |
| ENSDART00000038888 | hsdl2     | 0.331360296  | 0.293802861  | 0.248668235  | 0.085382052  |
| ENSDART00000038924 | sult1st1  | 0.0423301    | -0.129133641 | -0.497646461 | -0.249352869 |
| ENSDART00000038990 | jak1      | 0.414591598  | 0.220201928  | 0.070657217  | -0.102548961 |
| ENSDART00000039043 | rgs7bpb   | -0.383267221 | -0.448718374 | -0.120132554 | 0.14756534   |
| ENSDART00000039080 | wasb      | 0.537774473  | 0.660070537  | 0.394408091  | -0.045801603 |
| ENSDART00000039161 | hdhd2     | 0.366788589  | 0.057115496  | -0.197391924 | -0.146678217 |
| ENSDART00000039206 | rps23     | 0.388349294  | 0.322594165  | 0.070172062  | -0.095059659 |
| ENSDART00000039277 | lhfp13    | -0.493635642 | -0.41740998  | -0.318633213 | -0.189800628 |
| ENSDART00000039295 | lrrfip1a  | 0.201172846  | -0.052744603 | -0.60255637  | -0.234396047 |
| ENSDART00000039312 | ipo4      | 0.472349209  | 0.340323729  | 0.32654819   | 0.07839591   |
| ENSDART00000039399 | cavin2a   | -0.454722967 | -0.463350309 | -0.727916614 | -0.482344794 |
| ENSDART00000039443 | tuba8l4   | 0.45016266   | 0.547239574  | 0.701695743  | 0.194541839  |
| ENSDART00000039466 | rnf25     | 0.190959954  | 0.415197213  | 0.378723734  | 0.235880676  |
| ENSDART00000039485 | gabap12   | -0.111002032 | -0.162035427 | -0.331707696 | -0.213225245 |
| ENSDART00000039551 | mef2ca    | 2.857314883  | 3.343180737  | 3.275011062  | 3.48649726   |
| ENSDART00000039571 | camk2a    | -0.838498146 | -0.905374301 | -0.593078838 | -0.446882891 |
| ENSDART00000039585 | klhl36    | 0.23105636   | 0.314614252  | 0.405624735  | 0.264885345  |
| ENSDART00000039693 | pgp       | -0.344619279 | -0.551044992 | -0.227681437 | -0.38433532  |
| ENSDART00000039746 | epb41b    | 0.556721113  | 0.962382373  | 1.378686301  | 0.45048608   |
| ENSDART00000039788 | uqcrq     | -0.201371674 | -0.242426303 | -0.394323978 | -0.159681057 |
| ENSDART00000039865 | sdhdb     | -0.123077363 | -0.199973196 | -0.304203762 | -0.144165352 |
| ENSDART00000039868 | usp4      | -0.25602575  | -0.139457748 | -0.15513491  | -0.170681969 |
| ENSDART00000039987 | pgm3      | 0.351341795  | 0.131342573  | -0.075397144 | -0.106723338 |
| ENSDART00000040035 | ccdc80l1  | -0.195911171 | -0.175911639 | -0.396207214 | -0.331422513 |
| ENSDART00000040049 | camk2d2   | -0.441100303 | -0.359209869 | -0.184359733 | 0.062709499  |
| ENSDART00000040066 | adam9     | 0.358589887  | 0.583904956  | 0.549640677  | 0.256288209  |
| ENSDART00000040086 | pacsin1a  | -0.311462824 | -0.286213879 | -0.425986821 | -0.031983095 |
| ENSDART00000040116 | tnrc5     | -0.132560784 | -0.181210054 | -0.368693498 | -0.22290886  |

|                    |                   |              |              |              |              |
|--------------------|-------------------|--------------|--------------|--------------|--------------|
| ENSDART00000040184 | tenm1             | -0.25843006  | -0.314319075 | -0.175496746 | -0.005818614 |
| ENSDART00000040275 | kcnj11l           | -0.790164361 | -0.507671216 | -0.85342057  | -0.51870362  |
| ENSDART00000040278 | efna2a            | -0.820985512 | -0.748851824 | -0.238813858 | 0.346525856  |
| ENSDART00000040334 | pik3r3b           | -0.289525561 | -0.103810065 | 0.221174364  | 0.296766414  |
| ENSDART00000040346 | efr3ba            | -0.15754636  | -0.295932904 | -0.334562517 | -0.212090743 |
| ENSDART00000040434 | asah1b            | 0.563509259  | 0.420868789  | -0.056225927 | -0.32971968  |
| ENSDART00000040456 | cdc42bpab         | -0.484798472 | -0.258449967 | -0.177779388 | 0.139329121  |
| ENSDART00000040500 | tspan9a           | -0.374305977 | -0.544164723 | -0.123124308 | -0.153915406 |
| ENSDART00000040502 | trpc5a            | -0.568729425 | -1.014519921 | -0.522696272 | -0.18638518  |
| ENSDART00000040537 | gid1a             | -0.421902855 | -0.214222628 | 0.04546907   | 0.177131603  |
| ENSDART00000040542 | arhgef12a         | -0.286992716 | -0.169562154 | -0.197347098 | -0.111099085 |
| ENSDART00000040557 | CRIP2 (1 of many) | -0.132882678 | 0.562285777  | 0.768710088  | 0.441120913  |
| ENSDART00000040669 | sphkap            | -0.388395859 | -0.454597188 | 0.021563144  | 0.051812339  |
| ENSDART00000040672 | mecp2             | -0.242382035 | -0.413395534 | -0.149398689 | -0.148226048 |
| ENSDART00000040701 | ing5a             | 0.004576245  | -0.184827807 | -0.360745549 | -0.284929321 |
| ENSDART00000040708 | caprin2           | -0.196766553 | 0.78279717   | 0.834337788  | 0.695156181  |
| ENSDART00000040771 | rpl34             | 0.291435523  | 0.406434571  | 0.222752448  | -0.006604457 |
| ENSDART00000040804 | praf2             | 0.166225557  | 0.427661756  | 0.402173801  | 0.274020381  |
| ENSDART00000040827 | ncaph2            | 0.654906877  | 0.777407912  | 0.63027477   | 0.226543553  |
| ENSDART00000040900 | baxb              | 0.66837016   | 0.786823818  | 0.515591205  | 0.094501002  |
| ENSDART00000041007 | stmn1b            | -0.180266883 | 0.501280237  | 0.34630752   | 0.107820579  |
| ENSDART00000041114 | psmb2             | 0.343581501  | 0.272779677  | 0.256301247  | -0.006269993 |
| ENSDART00000041191 | gyg2              | 0.909324979  | 1.617533024  | 1.086480874  | 0.519765295  |
| ENSDART00000041257 | gsto2             | 0.760127953  | 0.383922047  | -0.10799465  | -0.396095115 |
| ENSDART00000041279 | tubb4b            | 0.433747505  | 0.468816243  | 0.626770783  | 0.445102188  |
| ENSDART00000041388 | cacng2a           | -0.088843708 | -0.391878721 | -0.181623249 | -0.021159404 |
| ENSDART00000041417 | camk1b            | -0.259356662 | -0.222277099 | -0.408590245 | -0.120593834 |
| ENSDART00000041443 | igsf21a           | -0.224595347 | -0.278632007 | -0.419145006 | -0.220026937 |
| ENSDART00000041468 | ap1ar             | 0.253231094  | 0.535778421  | 0.657902256  | 0.098067269  |
| ENSDART00000041503 | slc4a4a           | -0.308542931 | -0.316588825 | -0.297229141 | -0.158105481 |
| ENSDART00000041504 | tescb             | 0.44458368   | -0.282095189 | 0.067591772  | -0.116025945 |
| ENSDART00000041707 | unc119a           | -0.21008147  | -0.190962771 | -0.5453967   | -0.153347487 |
| ENSDART00000041714 | atp6v0a1b         | -0.327889206 | -0.302694525 | -0.070700098 | 0.131627227  |
| ENSDART00000041728 | cyp26a1           | -0.110572523 | -0.30661175  | -0.074827314 | 0.003208979  |
| ENSDART00000041740 | ubl7a             | -0.21096997  | -0.119372658 | 0.298633763  | 0.574535573  |
| ENSDART00000041751 | ercc1             | 0.342208194  | 0.265119266  | 0.084902107  | 0.028919147  |
| ENSDART00000041800 | epha8             | -0.01929649  | -0.346405332 | 0.164805877  | 0.748357168  |
| ENSDART00000041805 | metrn             | -0.185458155 | -0.302026239 | -0.151541546 | -0.276934548 |
| ENSDART00000041820 | lingo1a           | -0.3685918   | -0.267056385 | -0.206204269 | -0.004686852 |
| ENSDART00000041861 | syt1a             | -0.326937152 | -0.373717465 | -0.346529457 | -0.191055943 |
| ENSDART00000041869 | grin1a            | -0.314741638 | -0.554584424 | -0.238417502 | 0.088185899  |
| ENSDART00000041877 | csrn1a            | 1.299872398  | 1.369159722  | 1.350463811  | 0.717287101  |
| ENSDART00000041992 | dhrs12            | 0.21282475   | 0.60945999   | -0.222288782 | -0.248821854 |
| ENSDART00000042083 | gria4a            | -0.246573777 | -0.413439839 | -0.038291419 | 0.265641743  |
| ENSDART00000042123 | cx52.6            | -0.622226461 | -0.079417665 | -0.692157173 | -0.611068819 |
| ENSDART00000042134 | dock7             | 0.063646619  | 0.209946461  | 0.48316367   | 0.274325565  |
| ENSDART00000042162 | tm7sf2            | 0.1050645    | 0.758038931  | 0.952561873  | 0.4137868    |
| ENSDART00000042189 | pdk2b             | 0.734399082  | 1.569570791  | 1.007918384  | 0.211070696  |
| ENSDART00000042194 | cers4a            | -0.343157696 | -0.266390398 | -0.236875341 | -0.142108033 |
| ENSDART00000042200 | aldoab            | 0.726673418  | 1.529219824  | 2.318485768  | 1.809025522  |
| ENSDART00000042218 | pafah1b1a         | 0.049322983  | 0.127134272  | 0.313096774  | 0.220746894  |

|                    |                   |              |              |              |              |
|--------------------|-------------------|--------------|--------------|--------------|--------------|
| ENSDART00000042250 | rap1b             | 0.339690926  | 0.041784403  | 0.019413921  | -0.132436477 |
| ENSDART00000042255 | rab6bb            | 0.249992007  | 1.135776594  | 1.498200114  | 1.307756366  |
| ENSDART00000042276 | nxph1             | -0.320960824 | -0.220089718 | -0.50268354  | -0.230788559 |
| ENSDART00000042297 | kdelc1            | 0.328425656  | 0.736886183  | 0.437422887  | 0.039597286  |
| ENSDART00000042307 | fam60a            | -0.454119179 | -0.522927402 | -0.624149133 | -1.020018948 |
| ENSDART00000042386 | unm_sa1261        | -0.368338169 | -0.259611498 | -0.383565927 | -0.183992374 |
| ENSDART00000042481 | phf23a            | -0.371442433 | -0.230558793 | -0.302265692 | -0.28776115  |
| ENSDART00000042572 | ablim1b           | 0.023130185  | -0.084172657 | -0.818233794 | -0.360713717 |
| ENSDART00000042599 | dennd6aa          | -0.0532753   | -0.029202145 | -0.371955611 | -0.136277272 |
| ENSDART00000042624 | arap3             | -0.123633155 | -0.147189694 | -0.365577073 | -0.154745368 |
| ENSDART00000042683 | cadpsb            | -0.417914059 | -0.394489719 | 0.149869704  | 0.381243736  |
| ENSDART00000042963 | chst11            | 0.296547318  | 0.476599287  | 0.638913095  | 0.263644905  |
| ENSDART00000042972 | srpk1b            | -0.590887937 | -0.595753709 | -0.259675811 | -0.090086557 |
| ENSDART00000042984 | epha6             | -4.335346398 | -2.736601299 | -1.023821359 | 0.479123476  |
| ENSDART00000043058 | TENM2             | -0.559723778 | -0.553182426 | -0.524601572 | -0.11140967  |
| ENSDART00000043076 | ppdpfb            | -0.038298907 | 0.045116804  | -0.329828604 | -0.321738012 |
| ENSDART00000043091 | iqsec1b           | -0.102282724 | -0.271543671 | -0.319516795 | -0.119256647 |
| ENSDART00000043173 | rpl18             | 0.389153851  | 0.347510342  | 0.235541148  | 0.00423952   |
| ENSDART00000043180 | gria3b            | -0.628974157 | -0.919920549 | -0.567970281 | 0.039022237  |
| ENSDART00000043226 | guca1c            | -0.531402053 | -0.370893475 | -0.804093243 | -0.754648782 |
| ENSDART00000043312 | srsf5a            | -0.406457659 | -0.349179029 | 0.276259838  | -0.003669678 |
| ENSDART00000043429 | jph2              | -0.203422393 | 1.998676475  | 2.481431759  | 1.87668434   |
| ENSDART00000043455 | smad3b            | -0.137393915 | -0.114661975 | -0.243963828 | -0.226543078 |
| ENSDART00000043492 | trappc6bl         | -0.12751818  | -0.21743347  | -0.476970052 | -0.302538631 |
| ENSDART00000043507 | ciarta            | -0.034891069 | -0.156171585 | -0.423543489 | -0.111653268 |
| ENSDART00000043651 | dnal1             | -0.182764591 | -0.191705301 | -0.306394992 | -0.190228735 |
| ENSDART00000043666 | hs1bp3            | 1.060777617  | 0.463082325  | 0.168627927  | -0.515305865 |
| ENSDART00000043678 | apobec2b          | 1.815363093  | 0.931239114  | 0.794076282  | 0.812995775  |
| ENSDART00000043801 | cabp5b            | -0.44296443  | -0.237302409 | -0.884658288 | -0.372660272 |
| ENSDART00000043823 | osbp10b           | -0.615302858 | -0.415836047 | -0.293972471 | 0.154234814  |
| ENSDART00000043855 | dclk2a            | -0.104441255 | -0.395008642 | -0.62766162  | -0.184810585 |
| ENSDART00000043857 | irx5a             | -0.492824084 | -0.561776224 | 0.072886283  | 0.234832625  |
| ENSDART00000043924 | mpp6b             | -0.45376092  | -0.273823891 | -0.178237916 | -0.157850955 |
| ENSDART00000043932 | atp2a1            | 1.138744452  | 4.285725335  | 5.558096993  | 3.994336477  |
| ENSDART00000043933 | ndufb7            | -0.183005381 | -0.27475981  | -0.256491733 | -0.145691426 |
| ENSDART00000043945 |                   | -0.527606114 | -0.345502165 | -0.38556129  | -0.085040536 |
| ENSDART00000043953 | mfsd2b            | -0.226277331 | -0.20295362  | -0.451440771 | 0.020277702  |
| ENSDART00000044000 | plxna3            | 0.522678231  | 0.518528602  | 0.862237135  | 0.748340859  |
| ENSDART00000044009 | scdb              | -0.293214367 | -0.066392815 | 0.084209837  | 0.174747579  |
| ENSDART00000044057 | sept3             | -0.17670354  | 0.196164293  | 0.478730018  | 0.43476862   |
| ENSDART00000044150 | dnajc9            | -0.130894557 | -0.15046904  | -0.343680246 | -0.373143883 |
| ENSDART00000044154 | tnnt2c            | 0.256126919  | 0.781011759  | 0.616305237  | 0.377618007  |
| ENSDART00000044157 | scn4ab            | 1.170816112  | 2.050777967  | 2.7725392    | 2.001159499  |
| ENSDART00000044208 | lmo1              | -0.34602538  | -0.891618988 | -0.018405226 | 0.102622885  |
| ENSDART00000044238 | zgc:92066         | 1.060411872  | 1.124461317  | 0.621339815  | 0.051820002  |
| ENSDART00000044241 | KCNQ2 (1 of many) | -0.793205862 | -0.43808803  | 0.589879296  | 0.84351704   |
| ENSDART00000044264 | mmp14b            | 0.997152397  | 1.115840894  | 0.915921565  | 0.094130452  |
| ENSDART00000044276 | dip2bb            | -0.182549034 | -0.085935994 | 0.236910154  | 0.379645319  |
| ENSDART00000044294 | fryb              | -0.196859444 | -0.540115494 | -0.186847147 | -0.085192364 |
| ENSDART00000044314 | itgav             | 0.188708464  | -0.009103257 | -0.190172369 | -0.475418475 |
| ENSDART00000044328 | acss1             | 0.948368639  | 0.660526303  | 0.176495325  | -0.460639914 |

|                    |                    |              |              |              |              |
|--------------------|--------------------|--------------|--------------|--------------|--------------|
| ENSDART00000044371 | tox                | -0.382184105 | -0.377592563 | -0.085511133 | 0.05287602   |
| ENSDART00000044423 | magi1b             | -0.521004582 | -0.785194432 | 0.042021364  | 0.52355612   |
| ENSDART00000044426 | si:dkey-240h12.4   | 0.077516947  | -0.039107616 | -0.22879164  | -0.507759534 |
| ENSDART00000044453 | ano5a              | -0.027551778 | 0.223592536  | 0.548330121  | 0.427829524  |
| ENSDART00000044647 | ppil3              | 0.391623501  | 0.578322707  | 0.226885679  | 0.10080052   |
| ENSDART00000044658 | letmd1             | 0.311235989  | 0.320526266  | 0.39411459   | 0.349216193  |
| ENSDART00000044678 | GABRA2 (1 of many) | -0.18505593  | -0.452041699 | -0.058625322 | 0.015850219  |
| ENSDART00000044733 | NPBWR2             | -0.533926323 | -0.49881296  | -0.385102988 | -0.276547602 |
| ENSDART00000044735 | gria1b             | -0.281408167 | -0.37749512  | -0.41239512  | -0.179683873 |
| ENSDART00000044860 | maff               | 0.057535561  | 0.039208376  | -0.366680053 | -0.441007369 |
| ENSDART00000044896 | camk2d2            | -0.471410347 | -0.378784897 | -0.323522916 | -0.120871605 |
| ENSDART00000044949 | syt16              | -0.001457693 | -0.053066568 | 0.72824965   | 0.634879457  |
| ENSDART00000044963 | loxl4              | 1.867896709  | 1.134004715  | 1.5146614    | 0.310989698  |
| ENSDART00000044986 | rnd1a              | -0.894483212 | -0.275620607 | -0.461458    | -0.242681728 |
| ENSDART00000045071 | foxk2              | 0.01041623   | 0.131070865  | 0.347129546  | 0.265521213  |
| ENSDART00000045086 | prkceb             | -0.397671937 | -0.107653926 | 0.08012307   | 0.031299867  |
| ENSDART00000045126 | lama5              | -0.044158589 | 0.007727115  | -0.324426294 | -0.496259172 |
| ENSDART00000045232 | mtss1la            | -0.698215115 | -0.447289487 | 0.119673501  | -0.022641935 |
| ENSDART00000045284 | rpl37              | 0.494352175  | 0.447787745  | 0.229606145  | -0.010646089 |
| ENSDART00000045299 | ola1               | 0.514191862  | 0.666266592  | 0.533008533  | 0.271611648  |
| ENSDART00000045303 | tmprss9            | -0.116725282 | -0.194770382 | -0.365140883 | -0.064254559 |
| ENSDART00000045374 | smad3a             | -0.063329624 | -0.157712113 | -0.303211349 | -0.108940629 |
| ENSDART00000045391 | srgap2             | 0.042169336  | 0.118632088  | 0.377794988  | 0.307955564  |
| ENSDART00000045397 | stx11b.1           | 1.953998203  | 1.413835145  | 1.924246083  | 1.02039349   |
| ENSDART00000045410 | thy1               | 0.906274294  | 2.922050483  | 2.917431913  | 2.440516966  |
| ENSDART00000045479 | syt4               | 0.199773705  | 0.561264928  | 0.42766733   | -0.021116223 |
| ENSDART00000045555 | rab41              | -0.452536385 | -0.052299617 | 0.3824053    | 0.576200707  |
| ENSDART00000045616 | gabbr1b            | -0.290531763 | -0.52893984  | -0.416723119 | -0.192345482 |
| ENSDART00000045628 | irx6a              | -0.424070635 | -0.239579413 | 0.17038084   | 0.276181325  |
| ENSDART00000045659 | tcp11l1            | 0.225446633  | 0.445852163  | 0.278888616  | 0.19328127   |
| ENSDART00000045675 | slc52a2            | 0.16071928   | 0.405611618  | 0.292146022  | 0.046169521  |
| ENSDART00000045682 | rrp36              | 0.38981283   | 0.603671455  | 0.338055221  | 0.296271067  |
| ENSDART00000045684 | porcn              | -0.472251654 | -0.321238385 | -0.136837542 | 0.064329115  |
| ENSDART00000045697 | zgc:56493          | 0.323838871  | 0.24043595   | -0.000448434 | -0.189381569 |
| ENSDART00000045757 | march5l            | 3.527750979  | 3.782483659  | 2.945706162  | 1.186881806  |
| ENSDART00000045842 | rcan3              | -0.531033223 | -0.615136042 | -0.34287969  | -0.068102336 |
| ENSDART00000045861 | slc43a2a           | -0.304475968 | -0.378976343 | 0.111239312  | 0.188992557  |
| ENSDART00000045888 | tkta               | -0.540178562 | -0.404491163 | -0.145350137 | 0.055411831  |
| ENSDART00000045933 | sh3glb1b           | 0.424660866  | 0.274153114  | 0.044458674  | -0.153303197 |
| ENSDART00000046004 | wnt2bb             | -0.582117328 | -0.289636407 | -0.865141829 | -0.874797573 |
| ENSDART00000046050 | pcbd1              | 0.519297333  | 0.526198373  | -0.092439376 | -0.055017497 |
| ENSDART00000046066 | capn1a             | -0.174433704 | -0.141559786 | -0.304523077 | -0.134358035 |
| ENSDART00000046115 | mfsd2aa            | 0.413173515  | 1.356876257  | 1.539393726  | 0.598141045  |
| ENSDART00000046209 | acbd7              | 0.172970527  | 0.805855312  | 0.630012733  | 0.123911744  |
| ENSDART00000046211 | lnx2a              | -0.592157981 | -0.322543056 | -0.148137638 | -0.128059395 |
| ENSDART00000046218 | flnca              | 6.980277858  | 6.302871335  | 6.08375751   | 5.531037957  |
| ENSDART00000046253 | prkcq              | 0.856641094  | 1.199706901  | 0.196829623  | -0.396081861 |
| ENSDART00000046268 | pmelb              | 0.894230709  | 0.185058494  | -0.384535315 | -0.811085128 |
| ENSDART00000046360 | rhousa             | -0.234114921 | -0.11992892  | -0.459682602 | -0.396381281 |
| ENSDART00000046438 | kcnk2b             | -1.164610191 | -1.614380279 | -0.460863171 | 0.258871322  |
| ENSDART00000046498 | sema3fa            | -0.424113863 | -0.318396861 | -0.293026202 | -0.101692261 |

|                    |            |              |              |              |              |
|--------------------|------------|--------------|--------------|--------------|--------------|
| ENSDART00000046530 | rab42a     | -0.542354056 | -0.349553972 | -0.104901238 | 0.132258211  |
| ENSDART00000046542 | igf1rb     | -0.265329623 | -0.432225627 | -0.135218314 | -0.147354602 |
| ENSDART00000046587 | ap2m1a     | 0.393397352  | 0.521859633  | 0.500225377  | 0.048547949  |
| ENSDART00000046626 | PRKAR2B    | -0.181202107 | -0.272867538 | -0.191341626 | -0.012099353 |
| ENSDART00000046663 | camta1b    | -0.175908238 | -0.543108898 | -0.289499765 | -0.001152787 |
| ENSDART00000046678 | pak2b      | 0.067537468  | 0.265866932  | 0.367938524  | 0.197303091  |
| ENSDART00000046689 | tmed3      | 0.310928608  | 0.094278442  | -0.151364778 | -0.47701209  |
| ENSDART00000046712 | zgc:86609  | 0.278113439  | 0.188615214  | -0.290177028 | -0.454070036 |
| ENSDART00000046716 | cited2     | -0.252125812 | -0.225219779 | -0.427941506 | -0.423861644 |
| ENSDART00000046764 | gmds       | 0.16546148   | 0.334907039  | 0.47465655   | 0.2924672    |
| ENSDART00000046922 | rab13      | 0.426602975  | 0.215892939  | 0.022612864  | -0.308555932 |
| ENSDART00000046933 | sult1st5   | 0.218426293  | 0.869949792  | 0.854237199  | 0.702293309  |
| ENSDART00000046934 | coq9       | -0.280335275 | -0.284319265 | -0.255484353 | -0.03877329  |
| ENSDART00000046951 | ptpn11b    | -0.12533711  | -0.212829251 | -0.391615008 | -0.186327808 |
| ENSDART00000046973 | capza1a    | 0.117659515  | 0.282132124  | 0.303069026  | 0.119362421  |
| ENSDART00000046995 | txn2       | -1.624875893 | -1.011052145 | -0.305336636 | -0.07555861  |
| ENSDART00000047020 | casp9      | 0.406413734  | 0.845063479  | 0.618979742  | 0.291728295  |
| ENSDART00000047069 | tyms       | 1.498823911  | 1.293125646  | 0.841397173  | 0.487713483  |
| ENSDART00000047073 | oxsr1a     | 0.179223329  | 0.268680956  | 0.376160209  | 0.212719894  |
| ENSDART00000047082 | gdap1l1    | -0.237605119 | 0.285676986  | 0.669438597  | 0.59731396   |
| ENSDART00000047126 | clcn4      | -0.325495856 | -0.290597126 | 0.018460992  | 0.082569002  |
| ENSDART00000047143 | specc1     | 0.250947915  | 0.397558549  | 0.627196335  | 0.309975843  |
| ENSDART00000047175 | ssr4       | 0.274556908  | 0.120119155  | 0.036407988  | -0.174453213 |
| ENSDART00000047191 | glb1l      | 1.329711044  | 0.552831622  | 0.213363411  | -0.364178392 |
| ENSDART00000047362 | msra       | -0.031803809 | -0.196438308 | -0.422002476 | -0.295991402 |
| ENSDART00000047378 | sst3       | -0.489863502 | -0.562162931 | -0.649979789 | -0.586308909 |
| ENSDART00000047399 | mmp24      | -0.337136574 | -0.281370104 | 0.467116638  | 0.594580786  |
| ENSDART00000047409 | myh14      | 0.151853201  | 0.372826224  | 0.643058289  | 0.555183408  |
| ENSDART00000047416 | slc4a8     | -0.393460236 | -0.539636776 | -0.542467324 | -0.330988764 |
| ENSDART00000047541 | bach1b     | -0.343772395 | -0.510091534 | -0.468889885 | -0.333515696 |
| ENSDART00000047569 | igf2b      | -0.538912754 | -0.46572679  | -0.194582206 | 0.102619195  |
| ENSDART00000047662 | ppp1r13bb  | -0.080629431 | -0.11550057  | -0.271468608 | 0.046859797  |
| ENSDART00000047728 | melk       | 0.808255278  | 0.366287521  | 0.23278244   | 0.524042022  |
| ENSDART00000047857 | orc3       | 3.881796907  | 3.620009487  | 3.715059064  | 3.478890874  |
| ENSDART00000047954 | ugcg       | -0.094752728 | 0.184472082  | 0.264381156  | 0.087288534  |
| ENSDART00000048036 | gem        | -0.746612275 | -0.695957849 | -0.479539177 | -0.330372498 |
| ENSDART00000048050 | ITGB1BP2   | -0.056534701 | 0.311580562  | 0.724894589  | 0.983194822  |
| ENSDART00000048073 | zgc:171775 | 0.625715462  | 0.657465213  | 0.200858631  | -0.066721925 |
| ENSDART00000048107 | FP102018.1 | 0.402516182  | 0.222629184  | -0.14999501  | -0.581967671 |
| ENSDART00000048110 | six4b      | 0.757934328  | 2.322346312  | 2.776043581  | 1.88012445   |
| ENSDART00000048365 | syt6b      | -0.461087231 | -0.40037241  | -0.458496339 | -0.153902769 |
| ENSDART00000048383 | creld2     | 0.499343204  | 0.520824125  | 0.482480278  | 0.212076819  |
| ENSDART00000048432 | dlg4a      | -0.380839229 | -0.483618741 | -0.31591813  | -0.034480778 |
| ENSDART00000048599 | rps19      | 0.313599405  | 0.28541891   | 0.281484325  | -0.024061243 |
| ENSDART00000048707 | srgap1b    | -0.90586475  | -0.695392849 | -0.011664453 | 0.331175331  |
| ENSDART00000048775 | mbd3b      | -0.291847963 | -0.361950456 | -0.358913558 | -0.222238531 |
| ENSDART00000048819 | rassf2a    | -0.204366055 | -0.399787028 | -0.377471637 | -0.118487631 |
| ENSDART00000048853 | ube2d1a    | 0.133955448  | 0.280395319  | 0.282059322  | 0.156573319  |
| ENSDART00000048855 | mtus1b     | -0.449558058 | -0.427741832 | 0.166302333  | 0.000701193  |
| ENSDART00000048866 | ipmkb      | -0.299703051 | -0.158343907 | 0.084121168  | 0.000422995  |
| ENSDART00000048871 | desi1a     | -0.247171878 | -0.259133346 | 0.047182486  | 0.101740307  |

|                    |                  |              |              |              |              |
|--------------------|------------------|--------------|--------------|--------------|--------------|
| ENSDART00000048890 | slc22a2          | 0.30008182   | 0.486824781  | 0.442015061  | 0.075671897  |
| ENSDART00000048893 | pcbp3            | -0.37198127  | -0.476664366 | -0.345261768 | -0.190932807 |
| ENSDART00000048940 | vill             | -0.011902914 | -0.216832622 | -0.570278713 | -0.337359605 |
| ENSDART00000048977 | abcf1            | 0.295994115  | 0.413143633  | 0.435605861  | 0.158915281  |
| ENSDART00000048994 | pbx3b            | -0.545498331 | -0.428509616 | 0.129533791  | 0.149586816  |
| ENSDART00000049036 | zgc:92275        | -0.447578375 | -0.84153571  | -0.52710535  | -0.386325614 |
| ENSDART00000049075 | add3a            | -0.25124279  | -0.167771329 | -0.330721354 | -0.242087591 |
| ENSDART00000049099 | trip13           | 1.738467479  | 1.594316711  | 0.735690402  | 0.585616546  |
| ENSDART00000049135 | si:dkey-261m9.12 | 0.781337004  | 0.750536245  | 0.608174972  | 0.211334904  |
| ENSDART00000049154 | pthlha           | -0.57822331  | -0.570371268 | -0.522569114 | -0.481173816 |
| ENSDART00000049177 | rab6ba           | -0.532131764 | -0.115244957 | 0.417564602  | 0.557714845  |
| ENSDART00000049194 | gpr37b           | -0.562015213 | 0.012994785  | 0.671207906  | 0.757619967  |
| ENSDART00000049240 | tob1a            | -0.553621268 | -0.528794995 | -0.629368997 | -0.384085742 |
| ENSDART00000049264 | sdr16c5b         | 0.496225849  | 0.925512272  | 0.840394736  | 0.492626723  |
| ENSDART00000049291 | gria3a           | 0.136141556  | -3.339713475 | 0.061156993  | 0.119617746  |
| ENSDART00000049368 | atat1            | -0.456100083 | -0.161841688 | -0.10743096  | 0.240512647  |
| ENSDART00000049373 | cmtr1            | 3.529734054  | 4.85424569   | 5.483410402  | 3.408663479  |
| ENSDART00000049425 | sec61a1l         | 0.040274537  | 0.042437444  | 0.248643876  | 0.074434633  |
| ENSDART00000049434 | scamp4           | 0.767657025  | 0.801831806  | 0.544244726  | 0.399234701  |
| ENSDART00000049437 | cdc42bpb         | 0.021859432  | -0.018472292 | 0.242347511  | 0.210611193  |
| ENSDART00000049462 | rab15            | -0.425089968 | -0.185335259 | 0.21479615   | 0.289096284  |
| ENSDART00000049464 | fermt2           | 0.28468341   | 0.302053037  | 0.328009634  | 0.040193822  |
| ENSDART00000049465 | slc19a1          | 0.32288456   | 0.126425631  | -0.165912503 | -0.040050165 |
| ENSDART00000049572 | ncapd3           | 0.694925235  | 0.6794902    | 0.488650623  | 0.149625384  |
| ENSDART00000049589 | col11a1b         | 0.748320952  | 1.159222727  | 1.621624084  | 0.283450272  |
| ENSDART00000049633 | zgc:110006       | -0.212812767 | -0.199160747 | -0.43210422  | -0.304919838 |
| ENSDART00000049676 | depdc1a          | 1.209441584  | 0.891467797  | 0.780861798  | 0.190374501  |
| ENSDART00000049684 | bag2             | 0.817498026  | 0.419391857  | 0.164101637  | 0.068852338  |
| ENSDART00000049722 | pfdn5            | 0.271437948  | 0.37616378   | 0.12572137   | -0.064637497 |
| ENSDART00000049793 | gstm.1           | -0.113008537 | -0.081297777 | -0.307261435 | -0.386339749 |
| ENSDART00000049836 | bgnb             | -0.474953019 | -0.067188313 | -0.175252125 | -0.757542027 |
| ENSDART00000049885 | si:dkey-172j4.3  | -0.146868316 | -0.089398841 | -0.317501099 | -0.03734398  |
| ENSDART00000049900 | tagln2           | 0.588048217  | 1.077774727  | 1.105142914  | 0.190917953  |
| ENSDART00000049992 | syt9b            | -0.672988403 | -0.530192885 | 0.095421952  | 0.328394957  |
| ENSDART00000050018 | cnksr1           | 0.043033394  | -0.349786212 | -0.053406139 | -0.094004348 |
| ENSDART00000050037 | chrnb3b          | -0.414911692 | -0.004263798 | 0.444800143  | 0.950014126  |
| ENSDART00000050077 | sdcbp            | -0.585127298 | -0.412438306 | -0.175403243 | -0.033038502 |
| ENSDART00000050140 | CABZ01088365.1   | -0.08566459  | -0.329955925 | -0.093026456 | -0.10850944  |
| ENSDART00000050202 | rca3             | -0.240590006 | -0.307380747 | -0.423427653 | -0.130410568 |
| ENSDART00000050217 | efna1a           | -0.276270159 | -0.087399972 | -0.269604188 | -0.23920109  |
| ENSDART00000050230 | tspan3a          | -0.260999172 | -0.146975695 | -0.364155673 | -0.280149491 |
| ENSDART00000050271 | hexb             | 0.237342774  | -0.182676311 | -0.489143261 | -0.233593029 |
| ENSDART00000050303 | b3gat2           | -0.439065182 | -0.488507748 | -0.270928467 | 0.095807034  |
| ENSDART00000050308 | calm1b           | -0.359535363 | -0.241046962 | -0.074464366 | 0.015414816  |
| ENSDART00000050311 | rltpr            | -0.433814029 | -0.24205503  | 0.339832334  | 0.433192877  |
| ENSDART00000050332 | gna12a           | 0.472300359  | 0.391620605  | 0.3757936    | 0.086884817  |
| ENSDART00000050352 | si:ch211-87m7.2  | 0.324289445  | 0.10825652   | 0.093171262  | -0.186818955 |
| ENSDART00000050399 | npc2             | 0.729567353  | 0.287798394  | -0.063690935 | -0.310097689 |
| ENSDART00000050445 | trim2a           | -0.427473932 | -0.288810529 | -0.127175492 | 0.041370255  |
| ENSDART00000050559 | sh3rf1           | -0.402839399 | -0.313691549 | -0.2479685   | -0.17125224  |
| ENSDART00000050750 | rrm2b            | -0.324758311 | -0.221575036 | -0.394470152 | -0.266012642 |

|                    |                   |              |              |              |              |
|--------------------|-------------------|--------------|--------------|--------------|--------------|
| ENSDART00000050753 | cd36              | -0.281884107 | 0.047747268  | 0.431169618  | 0.458008288  |
| ENSDART00000050762 | phactr3b          | -0.629592387 | -0.363049766 | -0.266715209 | -0.083768273 |
| ENSDART00000050847 | GLDC              | 0.384969982  | 0.265449522  | 0.198357794  | 0.108750757  |
| ENSDART00000050863 | zgc:101858        | 0.531270185  | 0.546733132  | 0.428408309  | 0.278322374  |
| ENSDART00000050898 | ncf1              | 0.6701936    | 0.170526908  | -0.157127601 | -0.640736559 |
| ENSDART00000050910 | orai2             | -0.105799627 | 0.023857148  | 0.452924674  | 0.120793773  |
| ENSDART00000051182 | arhgap4b          | -0.41225839  | -0.320516515 | -0.225939723 | -0.055826953 |
| ENSDART00000051197 | c10h21orf59       | -0.175790498 | -0.1331203   | -0.516409592 | -0.442586367 |
| ENSDART00000051231 | gnb2              | -0.235263329 | 0.124417594  | 0.575032632  | 0.495502612  |
| ENSDART00000051234 | tnika             | 0.106489865  | 0.189584243  | 0.309030435  | 0.511149463  |
| ENSDART00000051357 | zmat5             | -0.126081267 | -0.164432805 | -0.376616148 | -0.245219161 |
| ENSDART00000051392 | spns3             | 1.320734766  | 0.750958136  | 0.798555508  | -0.096372125 |
| ENSDART00000051491 | sfrp1a            | 0.324084954  | 0.211296795  | -0.122014524 | -1.0775933   |
| ENSDART00000051515 | zgc:110329        | 0.175997647  | 0.392691176  | 0.340182733  | 0.206652443  |
| ENSDART00000051516 | tacr1a            | -0.234436772 | -0.252170036 | -0.371966451 | -0.377528767 |
| ENSDART00000051518 | rasa1a            | -0.264162997 | -0.276154428 | 0.166590332  | 0.366548962  |
| ENSDART00000051546 | rps6ka3a          | -0.063638799 | 0.031915539  | -0.376231824 | -0.261540289 |
| ENSDART00000051552 | mpdu1a            | -0.142610001 | -0.050886814 | -0.417815071 | -0.558529014 |
| ENSDART00000051556 | abca1b            | 0.962705135  | 0.587027009  | 0.239926413  | -0.279230387 |
| ENSDART00000051566 | zgc:101016        | 0.072400267  | -0.278957969 | -0.822407258 | -0.192676389 |
| ENSDART00000051614 | tchp              | 0.132551453  | 0.24050278   | 0.418776194  | 0.215450614  |
| ENSDART00000051621 | pgam5             | 0.243607349  | 0.33552261   | 0.455304621  | 0.149179919  |
| ENSDART00000051644 | coq5              | -0.310043454 | -0.139390844 | -0.270196538 | -0.205912752 |
| ENSDART00000051655 | snrnp27           | -0.149284802 | -0.196914421 | -0.340354698 | -0.296345743 |
| ENSDART00000051664 | ypel1             | -0.285276636 | -0.074600808 | -0.32874479  | -0.098702346 |
| ENSDART00000051666 | ppm1f             | 0.089738986  | 0.277096017  | 0.445138137  | 0.206148798  |
| ENSDART00000051693 | irx4a             | -1.596922819 | -2.014349322 | 0.164610846  | 0.924604512  |
| ENSDART00000051697 | evla              | -0.055749697 | 0.354222037  | 0.437976697  | 0.322467243  |
| ENSDART00000051723 | si:ch211-193k19.1 | -0.524075663 | -0.333228258 | -0.259244771 | -0.088981638 |
| ENSDART00000051763 | rps3a             | 0.36528781   | 0.402890251  | 0.287932185  | 0.011460462  |
| ENSDART00000051792 | sema3aa           | 0.043541661  | -0.100781063 | -0.302534685 | -0.247434431 |
| ENSDART00000051807 | lasp1             | 0.121443442  | 0.384838028  | 0.393366972  | 0.231292626  |
| ENSDART00000051906 | ube2c             | 1.239012745  | 1.032037835  | 0.553625781  | 0.164264884  |
| ENSDART00000051919 | n6amt1            | 0.421272913  | 0.445198021  | 0.366479977  | 0.202998784  |
| ENSDART00000051948 | si:dkey-17m8.2    | -2.249269734 | -0.678959768 | -1.034434829 | -1.318620097 |
| ENSDART00000051974 | drd4b             | -0.419693377 | 0.024027774  | -0.191636302 | -0.159413451 |
| ENSDART00000052029 | cart3             | -0.527262177 | -0.518524777 | -0.63363087  | -0.567396556 |
| ENSDART00000052061 | cnn2              | 0.810381891  | 0.55886321   | 0.442877218  | -0.431652883 |
| ENSDART00000052065 | si:rp71-39b20.4   | -0.313076871 | -0.443642109 | -0.50831344  | -0.2481846   |
| ENSDART00000052067 | insl3             | -0.34446258  | -0.603612124 | -0.679111871 | -0.291897986 |
| ENSDART00000052082 | rpl30             | 0.377785904  | 0.342931306  | 0.098750304  | -0.086094728 |
| ENSDART00000052083 | fjx1              | -0.061315226 | -0.667932816 | -0.149604151 | 0.07387804   |
| ENSDART00000052090 | fuca1.2           | 0.607737239  | 0.489644017  | 0.400376939  | 0.091450373  |
| ENSDART00000052104 | fuca1.1           | 0.706031916  | 0.625980807  | 0.554044121  | 0.174374129  |
| ENSDART00000052113 | lingo1b           | -0.337763041 | -0.148396867 | -0.080123582 | -0.033848116 |
| ENSDART00000052124 | fam49al           | -0.409057809 | -0.177161374 | 0.563238983  | 0.47605027   |
| ENSDART00000052126 | yars              | 0.350203533  | 0.365550787  | 0.323606131  | 0.105596802  |
| ENSDART00000052168 | hrh3              | 0.375251408  | 0.91270689   | 1.213693931  | 0.380712944  |
| ENSDART00000052256 | sumo3b            | -0.129514175 | -0.087060285 | -0.253552673 | -0.198560199 |
| ENSDART00000052307 | arrdc3b           | -0.385234832 | -0.285495364 | -0.380608917 | -0.283766566 |
| ENSDART00000052318 | mdka              | -0.324471926 | -0.37363799  | -0.54050807  | -0.370260207 |

|                    |                   |              |              |              |              |
|--------------------|-------------------|--------------|--------------|--------------|--------------|
| ENSDART00000052322 | zgc:110699        | -0.266905411 | -0.248249923 | -0.482205646 | -0.223841905 |
| ENSDART00000052331 | rps20             | 0.422414342  | 0.403711723  | 0.215205833  | -0.059084102 |
| ENSDART00000052346 | gnao1b            | -0.534691372 | -0.39418636  | -0.143300564 | 0.218777626  |
| ENSDART00000052351 | cnep1r1           | -0.133092087 | -0.135980199 | -0.291785579 | -0.071751039 |
| ENSDART00000052385 | tph1b             | -0.370644209 | -0.494882963 | -0.236758451 | -0.433606661 |
| ENSDART00000052397 | pias1a            | -0.248631388 | -0.263511268 | -0.331035933 | -0.095610748 |
| ENSDART00000052421 | txnipa            | 1.054359781  | 1.031010785  | 1.048664605  | 0.430054853  |
| ENSDART00000052423 | spry2             | -0.373633249 | -0.274093568 | -0.317163264 | -0.534996547 |
| ENSDART00000052503 | nudcd1            | 0.220268862  | 0.211574095  | 0.29643349   | 0.134588484  |
| ENSDART00000052511 | hnrnpa0l          | 0.098563881  | 0.214926285  | 0.391405743  | 0.211573162  |
| ENSDART00000052537 | zgc:163107        | 0.254281338  | 0.227112479  | 0.142188905  | 0.117476144  |
| ENSDART00000052539 | myo1ea            | 0.574953247  | 0.619444947  | 0.654028338  | 0.173056841  |
| ENSDART00000052541 | ccnb2             | 1.168966788  | 1.017487756  | 0.69127691   | 0.504285143  |
| ENSDART00000052620 | npy               | -0.456788991 | -0.449905237 | -0.529362885 | -0.310086201 |
| ENSDART00000052638 | slc27a2a          | 0.420886529  | 0.920976528  | 0.833136576  | 0.001602661  |
| ENSDART00000052656 | rras2             | 0.556656504  | 0.801505793  | 0.534247735  | 0.118931735  |
| ENSDART00000052703 | nucb2b            | -0.072514611 | -0.317049949 | -0.490530665 | -0.459714357 |
| ENSDART00000052730 | rps13             | 0.392793291  | 0.407259594  | 0.231403052  | 0.009148185  |
| ENSDART00000052749 | nod1              | 0.321629747  | 0.111770638  | -0.064002417 | -0.693750338 |
| ENSDART00000052761 | rpl39             | 0.335691979  | 0.34926929   | 0.1141905    | -0.000371665 |
| ENSDART00000052802 | calb2b            | -1.334486374 | -1.407708939 | -0.475837952 | 0.218368357  |
| ENSDART00000052838 | acta1a            | 0.35046601   | 2.371192607  | 2.304510866  | 0.91139897   |
| ENSDART00000052871 | pop7              | -0.057197275 | 0.295354721  | 0.463638671  | 0.27819074   |
| ENSDART00000052912 | pcdh20            | -0.38541457  | -0.110151808 | -0.462368809 | -0.238274084 |
| ENSDART00000052915 | ash1l             | 0.173309311  | 0.167145004  | 0.317504355  | 0.12008578   |
| ENSDART00000052917 | slc3a2a           | 0.509465627  | 0.333845604  | -0.024881296 | -0.285712584 |
| ENSDART00000052989 | ache              | -0.369275035 | -0.306496087 | -0.342496448 | -0.099646921 |
| ENSDART00000053001 | tcn2              | 0.058701765  | -0.020005828 | -0.457202856 | -0.602127411 |
| ENSDART00000053003 | hexim1            | -0.295110864 | -0.174423589 | 0.055276892  | 0.067518179  |
| ENSDART00000053095 | rhbdf1a           | 0.708583914  | 0.695350284  | 0.352388623  | 0.004181603  |
| ENSDART00000053120 | gpr185b           | -0.57955621  | -1.320827874 | -0.56412655  | -0.654076001 |
| ENSDART00000053126 | aanat1            | -0.126925707 | -0.471091345 | -0.287328219 | -0.040926683 |
| ENSDART00000053139 | atp6v0cb          | -0.239525606 | -0.317576827 | -0.287566582 | -0.021198281 |
| ENSDART00000053187 | stk35l            | -0.090868048 | -0.135202146 | -0.364753171 | -0.24725243  |
| ENSDART00000053240 | cab39l            | 0.313790093  | 0.462769475  | 0.441611468  | 0.290026864  |
| ENSDART00000053267 | hnrnpa1b          | 0.306954561  | 0.087684612  | 0.037367395  | -0.002841599 |
| ENSDART00000053284 | bcl9              | -0.057531558 | 0.216352129  | 0.432379429  | 0.260365529  |
| ENSDART00000053285 | ndufa7            | -0.051624088 | -0.210448889 | -0.329202666 | -0.117246353 |
| ENSDART00000053304 | si:ch211-114n24.6 | 0.627425485  | 0.596987541  | 0.770158215  | 0.21603311   |
| ENSDART00000053310 | tmem18            | -0.091641733 | -0.057752607 | -0.353980434 | -0.264448619 |
| ENSDART00000053325 | tomm40l           | 0.351677862  | 0.400415779  | 0.406067875  | 0.134025152  |
| ENSDART00000053367 | hmgn3             | -0.174648563 | -0.165335262 | -0.310027237 | -0.181225286 |
| ENSDART00000053380 | hax1              | -0.143446597 | -0.149458858 | -0.363330115 | -0.294300868 |
| ENSDART00000053405 | scamp2            | 0.377844511  | 0.106568039  | 0.060099408  | -0.324550719 |
| ENSDART00000053463 | mgll              | -0.18197879  | -0.150318561 | -0.320930933 | -0.180307684 |
| ENSDART00000053494 | anks4b            | -0.562445249 | -0.270911364 | -0.580434775 | -0.289114333 |
| ENSDART00000053750 | acsl2             | -0.784570064 | -0.626588121 | -0.673780261 | -0.449722468 |
| ENSDART00000053761 | bms1              | 0.415838377  | 0.296751152  | 0.241962107  | 0.100266391  |
| ENSDART00000053773 | lsm6              | -0.104076864 | -0.094751595 | -0.350900229 | -0.413521857 |
| ENSDART00000053806 | gab1              | 2.484308926  | 2.134716604  | 2.429792903  | 1.630078037  |
| ENSDART00000053834 | psmc6             | 0.096829198  | 0.261162402  | 0.176391614  | 0.055545263  |



|                    |                   |              |              |              |              |
|--------------------|-------------------|--------------|--------------|--------------|--------------|
| ENSDART00000053841 | ddhd1b            | -0.251051379 | -0.26914625  | -0.031733869 | 0.07838534   |
| ENSDART00000053860 | saxo2             | -0.675755032 | -0.618170257 | -0.767927477 | -1.172976969 |
| ENSDART00000053869 | slc44a2           | 0.03477078   | 0.96666703   | 1.3453814    | 0.899279007  |
| ENSDART00000053916 | mtnr1ab           | -0.333808774 | -0.363646472 | -0.291230509 | -0.411800208 |
| ENSDART00000053925 | mtmr7a            | 0.252266702  | 0.492232945  | 0.532543286  | 0.441567176  |
| ENSDART00000053932 | cbasa             | 1.196219296  | 0.806157212  | 0.553945426  | 0.279319174  |
| ENSDART00000054007 | slc8a4b           | -0.011734485 | -0.299949751 | -0.451416872 | -0.315264472 |
| ENSDART00000054020 | hivep3b           | 0.041000622  | -0.364922266 | -0.147208921 | -0.149490959 |
| ENSDART00000054026 | rcc1              | 0.376288807  | 0.340916908  | 0.360562186  | 0.188805345  |
| ENSDART00000054062 | nek12             | 0.979847079  | 2.121821413  | 1.72566276   | 1.104924836  |
| ENSDART00000054070 | surf2             | 0.311577894  | 0.338934517  | 0.34052692   | 0.125736963  |
| ENSDART00000054071 |                   | 0.085813894  | -0.09956216  | 0.306019728  | 0.602458638  |
| ENSDART00000054078 | rpa2              | 0.380370186  | 0.444560906  | 0.363788059  | 0.096462711  |
| ENSDART00000054137 | igfbp5b           | -0.49960111  | -0.321727345 | 0.242454388  | 0.365417817  |
| ENSDART00000054175 | smad5             | 0.268560343  | 0.329305064  | 0.367006369  | -0.092635665 |
| ENSDART00000054202 | si:ch211-145b13.5 | -0.57317034  | 0.068003489  | -0.485735579 | -0.183705508 |
| ENSDART00000054209 | cdkn2a/b          | -0.651631236 | -0.494220791 | -0.672480074 | -0.361655459 |
| ENSDART00000054243 | dpf2l             | 0.196658591  | 0.403359284  | 0.517168503  | 0.26603871   |
| ENSDART00000054322 | cnrip1b           | -0.129671726 | -0.251461369 | -0.057872634 | -0.024935203 |
| ENSDART00000054386 | qdprb1            | -0.130677564 | -0.146959168 | -0.522581238 | -0.268035824 |
| ENSDART00000054408 | gsg1l             | -0.338795387 | -0.334881942 | -0.642215658 | -0.428166696 |
| ENSDART00000054452 | dlgap1b           | -0.55212867  | -0.830902632 | -0.186012386 | 0.281181047  |
| ENSDART00000054462 | smim19            | -0.090105146 | -0.174385509 | -0.37090077  | -0.289350438 |
| ENSDART00000054472 | tll1              | -0.241128673 | -0.208136    | -0.494254448 | -0.202017577 |
| ENSDART00000054552 | cdh8              | -0.482196874 | -0.526834841 | -0.273874965 | 0.0505098    |
| ENSDART00000054574 | polr1e            | 0.39788071   | 0.231113321  | 0.09078837   | -0.014285707 |
| ENSDART00000054581 | march1            | -0.100945889 | -0.377180996 | -0.379666436 | -0.107576973 |
| ENSDART00000054664 | tnnc1b            | -0.083935925 | 3.176389417  | 3.430200861  | 1.884280525  |
| ENSDART00000054674 | mtnr1aa           | -0.46530953  | -0.508091587 | -0.367618326 | -0.477932737 |
| ENSDART00000054687 | il1rapl2          | -0.293064258 | -0.530563685 | -0.194225592 | 0.06661817   |
| ENSDART00000054689 | atoh8             | -0.386924835 | -0.23478989  | -0.297672036 | -0.53086166  |
| ENSDART00000054691 | uba1              | 0.10035699   | 0.287144805  | 0.420196482  | 0.237625478  |
| ENSDART00000054735 | SYNPR (1 of many) | -0.204530212 | -0.189982465 | -0.242945057 | -0.369440481 |
| ENSDART00000054736 | bhlhe23           | -0.369485488 | -0.514619457 | -0.390416516 | -0.190127988 |
| ENSDART00000054760 | zgc:162144        | -0.154581168 | -0.586579914 | -0.580706302 | -0.278802593 |
| ENSDART00000054790 | zmp:0000001069    | -0.970537582 | -1.254323928 | -0.841864806 | -0.072822598 |
| ENSDART00000054833 | rgs11             | -0.582556718 | -0.789821251 | -0.427532995 | 0.127688375  |
| ENSDART00000054837 | ap1s2             | -0.004289143 | 0.194115514  | 0.293597748  | 0.151563344  |
| ENSDART00000054849 | pls3              | 0.365005671  | 0.852391802  | 1.00799598   | 0.660436059  |
| ENSDART00000054867 | aup1              | -0.021467306 | -0.053295505 | -0.309019838 | -0.217937602 |
| ENSDART00000054876 | npm1b             | 0.13266464   | 0.298387409  | 0.130756001  | 0.083140409  |
| ENSDART00000054877 | fgf24             | -0.371366592 | -0.422467709 | -0.342651042 | -0.342396761 |
| ENSDART00000054987 | actb1             | 0.719668079  | 0.845173501  | 0.884967639  | 0.398548729  |
| ENSDART00000054989 | fscn1b            | -0.529299226 | -0.417661269 | 0.066759573  | 0.494675778  |
| ENSDART00000055019 | ndufa4            | -0.243803126 | -0.403243102 | -0.444723985 | -0.066106721 |
| ENSDART00000055038 | rybpa             | -0.189184893 | -0.138456944 | 0.268105644  | 0.373370341  |
| ENSDART00000055071 | nptx2a            | -3.565846773 | -2.700342636 | -0.646259822 | -0.789148036 |
| ENSDART00000055134 | ogfr              | -0.383562939 | -0.286066309 | -0.21229445  | -0.172842524 |
| ENSDART00000055139 | col9a3            | 0.340683061  | 0.20859259   | -0.192921312 | -1.195377277 |
| ENSDART00000055152 | taf11             | -0.482193927 | -0.885413263 | -0.244432703 | -0.649425725 |
| ENSDART00000055160 | il11a             | 1.677180571  | 0.610178512  | -0.274837581 | -0.887218575 |

|                    |                      |              |              |              |              |
|--------------------|----------------------|--------------|--------------|--------------|--------------|
| ENSDART00000055171 | grapa                | 0.991444674  | 1.026501701  | 0.907734856  | 0.689609359  |
| ENSDART00000055186 | atp5j2               | -0.168904246 | -0.309514947 | -0.449394402 | -0.201772036 |
| ENSDART00000055253 | filip1l              | 3.442073683  | 3.796340861  | 4.199635374  | 3.015929109  |
| ENSDART00000055262 | cdk5r1a              | -0.345552765 | -0.416237328 | -0.217352163 | -0.195826689 |
| ENSDART00000055264 | CA10 (1 of many)     | -0.387267589 | -0.307777286 | -0.264643025 | -0.127280824 |
| ENSDART00000055269 | gng13b               | -0.70656822  | -0.547882014 | 0.352208471  | 0.531882213  |
| ENSDART00000055287 | zgc:109934           | 0.762332695  | 0.487859158  | -0.045189444 | -0.423101752 |
| ENSDART00000055325 | psmb7                | 3.620821341  | 3.668842367  | 3.694371073  | 3.321198364  |
| ENSDART00000055328 | nek6                 | 0.491226657  | 0.428884947  | 0.11516767   | -0.052210357 |
| ENSDART00000055336 | dennd1a              | 0.280502184  | 0.250804932  | 0.331143912  | 0.195537503  |
| ENSDART00000055340 | fus                  | -0.011490396 | 0.383733399  | 0.662780299  | 0.416441518  |
| ENSDART00000055380 | tubb5                | 2.169554793  | 3.899556169  | 4.316772272  | 3.57490014   |
| ENSDART00000055395 | osr2                 | 0.396980684  | 1.020974716  | 1.320896999  | 1.066319399  |
| ENSDART00000055428 | cbx7a                | 0.780269243  | 0.615351279  | 0.524687311  | -0.270346219 |
| ENSDART00000055465 | si:ch211-149k23.9    | -0.23663044  | -0.394558494 | -0.331258304 | -0.323817823 |
| ENSDART00000055473 | grb2b                | -0.073731957 | 0.038177184  | -0.265388265 | -0.174944785 |
| ENSDART00000055487 | chmp3                | -0.028426397 | -0.094862832 | -0.316592568 | -0.291442829 |
| ENSDART00000055492 | ddx5                 | 0.105976659  | 0.207326629  | 0.32877191   | 0.140872666  |
| ENSDART00000055567 | gnrhr4               | -0.356419162 | -0.425772903 | -0.482362822 | -0.623317801 |
| ENSDART00000055607 | pdgfb                | -0.474199721 | -0.401424866 | -0.415940684 | -0.433592391 |
| ENSDART00000055609 | atf4b                | 0.138344185  | 0.51758353   | 0.353617358  | 0.087935611  |
| ENSDART00000055611 | isca2                | -0.127743819 | -0.187288303 | -0.524298231 | -0.307747827 |
| ENSDART00000055694 | cdab                 | -0.082751258 | -0.099425929 | -0.28235988  | -0.295865587 |
| ENSDART00000055706 | her15.1              | -1.483608056 | -1.154441068 | -0.698110478 | -1.436427969 |
| ENSDART00000055709 | her2                 | -0.984524994 | -0.833253569 | -0.717745512 | -1.233522642 |
| ENSDART00000055710 | aldh4a1              | -0.225772345 | -0.209769264 | -0.373180163 | -0.178717825 |
| ENSDART00000055756 | tbc1d12a             | -0.033893992 | 0.095679716  | 0.342628218  | 0.232107662  |
| ENSDART00000055779 | ggact.2              | -0.390632373 | -0.197002813 | -0.565987089 | -0.546417063 |
| ENSDART00000055780 | jpt2                 | 0.208785852  | 0.245567055  | 0.12691728   | -0.082734531 |
| ENSDART00000055817 | PIGG                 | -0.041747749 | -0.262998575 | -0.390921965 | -0.198616638 |
| ENSDART00000055890 | znf385c              | -0.397413591 | -0.444425008 | -0.419820845 | -0.297765515 |
| ENSDART00000055913 | hist2h2l             | -0.328500488 | -0.315748168 | -0.27355808  | -0.150594371 |
| ENSDART00000055932 | pigh                 | -0.149859895 | -0.076712594 | -0.279647992 | -0.164515657 |
| ENSDART00000055936 | isl2b                | -1.527471977 | -1.312125436 | 0.470803449  | 0.853726063  |
| ENSDART00000055995 | sagb                 | -0.512319213 | -0.180320177 | -0.444781708 | -0.186196646 |
| ENSDART00000056005 | ascl1a               | 1.787445127  | 1.283325532  | 0.749862779  | 0.792492648  |
| ENSDART00000056035 | PMM1                 | -0.318342084 | -0.457172695 | -0.421149458 | -0.159828821 |
| ENSDART00000056081 | sulf1                | 1.721344224  | 3.792219559  | 4.448503543  | 2.727690528  |
| ENSDART00000056138 | igsf8                | -0.41438699  | -0.276734989 | -0.097715498 | 0.052342087  |
| ENSDART00000056213 | pik3r1               | -0.34639661  | -0.306212461 | -0.436349985 | -0.247937167 |
| ENSDART00000056254 | stap2a               | 0.934389037  | 1.208596726  | 1.287672321  | 0.743017194  |
| ENSDART00000056278 | SLC25A22 (1 of many) | -0.288459944 | -0.379459616 | 0.002234165  | 0.21084669   |
| ENSDART00000056286 | h1f0                 | -0.326358805 | 0.273543898  | 0.626230484  | 0.593578182  |
| ENSDART00000056294 | pitrm1               | 0.368247543  | 0.389541704  | 0.328836098  | 0.178268037  |
| ENSDART00000056295 | psap                 | 0.394315497  | 0.070717853  | -0.202183441 | -0.455675198 |
| ENSDART00000056305 | fzd8b                | -0.95322142  | -0.49703101  | 0.067617805  | 0.048955399  |
| ENSDART00000056328 | elovl4b              | -0.472600721 | -0.194626997 | -0.10087467  | 0.110456628  |
| ENSDART00000056333 | CU929150.1           | 0.302438567  | 0.370614966  | 0.439965996  | 0.209083279  |
| ENSDART00000056369 | cadm2a               | -0.177754586 | -0.327047473 | -0.068598077 | -0.03429359  |
| ENSDART00000056376 | tmem55ba             | 0.03327073   | 0.191352043  | 0.318689436  | 0.072412325  |
| ENSDART00000056420 | alas2                | 0.719442022  | 0.937854985  | 1.477738462  | 0.179843085  |

|                    |                |              |              |              |              |
|--------------------|----------------|--------------|--------------|--------------|--------------|
| ENSDART00000056457 | mitfa          | 0.929754118  | 0.38849893   | 0.30836176   | -0.311729197 |
| ENSDART00000056460 | gbp1           | 3.785035011  | 3.151116027  | 3.74676295   | 2.092352698  |
| ENSDART00000056466 | camk2d1        | -0.163681889 | -0.265767151 | -0.291660383 | 0.000303403  |
| ENSDART00000056514 | gng7           | -0.676363728 | -0.720108736 | -0.535048991 | -0.288646977 |
| ENSDART00000056522 | skila          | -0.013727131 | -0.304210156 | -0.124205506 | -0.010199259 |
| ENSDART00000056540 | casq1a         | 0.340240931  | 1.131481384  | 1.513535686  | 1.324229104  |
| ENSDART00000056544 | tox4a          | 0.131870382  | 0.296259606  | 0.350040714  | 0.249645538  |
| ENSDART00000056577 | RBP1           | 0.71451345   | 0.476305531  | 0.296937751  | 0.089894332  |
| ENSDART00000056639 | faim2a         | -0.345615546 | -0.285647372 | -0.169343793 | 0.000937504  |
| ENSDART00000056671 | brinp2         | -0.564206507 | -0.55260615  | -0.353392227 | 0.031594069  |
| ENSDART00000056686 | mrc1b          | 0.993000172  | 0.810204425  | 0.489266441  | -0.068136928 |
| ENSDART00000056712 | etfdh          | 0.23563688   | 0.425716128  | 0.377386118  | 0.136575345  |
| ENSDART00000056721 | ldhd           | -0.445248015 | -0.387879357 | -0.435006793 | -0.179899207 |
| ENSDART00000056734 | setd7          | -0.044426299 | -0.050437779 | -0.332150365 | -0.191170985 |
| ENSDART00000056735 | rgs20          | -0.263112929 | -0.317514258 | -0.646869905 | -0.425880318 |
| ENSDART00000056795 | hectd3         | 0.187585997  | 0.34309988   | 0.435708832  | 0.360997812  |
| ENSDART00000056810 | drd1b          | -0.453660686 | -0.522513213 | -0.435699921 | -0.247093083 |
| ENSDART00000056865 | ctnnbip1       | 0.431885199  | 0.971175617  | 1.010655462  | 0.599546466  |
| ENSDART00000056885 | CU929046.1     | -0.462145697 | -0.331087748 | 0.285634599  | 0.389113052  |
| ENSDART00000056893 | pdcd7          | 0.040703622  | 0.122107923  | 0.35136997   | 0.096989832  |
| ENSDART00000056927 | egln1a         | -0.373304639 | -0.331810821 | -0.548972472 | -0.202283187 |
| ENSDART00000056939 | zgc:85858      | -0.254903494 | -0.357469282 | -0.615277126 | -0.499477333 |
| ENSDART00000056963 | stk25b         | -0.084642109 | -0.27353983  | -0.240916991 | -0.092979316 |
| ENSDART00000056987 | marcksl1a      | 0.199644536  | 0.480185443  | 0.561780108  | 0.295794028  |
| ENSDART00000056996 | sfrp5          | 0.077859934  | 0.01622227   | -0.244583159 | -1.042810978 |
| ENSDART00000057095 | si:dkey-24p1.1 | -0.474380833 | -0.459390323 | -0.572876221 | -0.481612744 |
| ENSDART00000057124 | tefa           | -0.17959692  | 0.074135039  | -0.330628318 | -0.262330789 |
| ENSDART00000057125 | tefa           | -0.190705988 | 0.094171259  | -0.306461854 | -0.301060608 |
| ENSDART00000057159 | cacnb1         | 1.304600132  | 2.011299334  | 2.307200837  | 1.559835487  |
| ENSDART00000057174 | arpc5a         | 0.695733745  | 0.614813351  | 0.637681436  | 0.535387536  |
| ENSDART00000057258 | slc12a5a       | -0.776929597 | -2.750292921 | -0.618148385 | -0.058229169 |
| ENSDART00000057299 | st6galnac5a    | -0.846236683 | -0.849009548 | -0.253708637 | -0.007082793 |
| ENSDART00000057318 | dusp8b         | 0.80659762   | 0.962100249  | 0.680537568  | 0.386784732  |
| ENSDART00000057320 | zgc:171579     | -1.053157551 | -0.622493525 | -1.271148863 | -1.344481218 |
| ENSDART00000057325 | cacng4a        | -0.326351391 | -0.28139538  | -0.566189708 | -0.15243738  |
| ENSDART00000057369 | igfbp5a        | -0.503493701 | -0.12557648  | 0.011432007  | -0.035083178 |
| ENSDART00000057377 | arg2           | -0.266719608 | -0.373190344 | -0.501724428 | -0.206121282 |
| ENSDART00000057422 | pacsin1a       | -0.590114235 | -0.673330755 | -0.518895915 | -0.206589128 |
| ENSDART00000057439 | parla          | -0.763945698 | -0.13237506  | -0.4980372   | -0.373141189 |
| ENSDART00000057458 | CABZ01088149.1 | 0.207455616  | 0.356974308  | 0.107522223  | 0.159078208  |
| ENSDART00000057519 | zgc:194209     | 0.014343488  | -0.12072846  | -0.449908342 | -0.453116382 |
| ENSDART00000057553 | ch25hl1.1      | 0.477648419  | 0.50568744   | -0.255154291 | -1.200576847 |
| ENSDART00000057565 | sdhaf4         | -0.101594286 | -0.172555564 | -0.390218832 | -0.338776854 |
| ENSDART00000057584 | slc1a4         | 0.291595567  | 1.233259249  | 1.405286425  | 1.089173123  |
| ENSDART00000057638 | hk1            | -0.255062585 | -0.314354089 | -0.268977492 | -0.110279892 |
| ENSDART00000057644 | lhx4           | -0.267668007 | -0.268543602 | -0.190125613 | -0.119751289 |
| ENSDART00000057645 | qsox1          | 0.191462539  | 0.115464338  | -0.177011398 | -0.490873756 |
| ENSDART00000057689 | bag3           | -0.537315577 | -0.216588912 | -0.658528557 | -0.795247472 |
| ENSDART00000057710 | ccdc85a        | -0.175789149 | -0.226891363 | -0.323862394 | -0.128238988 |
| ENSDART00000057865 | ier3ip1        | -0.032004312 | -0.136273649 | -0.345681209 | -0.364367077 |
| ENSDART00000057910 | nrgna          | -0.338737739 | -0.336045781 | -0.223139332 | 0.191467698  |

|                    |                   |              |              |              |              |
|--------------------|-------------------|--------------|--------------|--------------|--------------|
| ENSDART00000057918 | si:ch211-147h1.4  | 0.058919084  | -0.340722361 | -0.680330981 | -0.211102009 |
| ENSDART00000057957 | itm2cb            | -0.410626815 | -0.396999775 | -0.657592832 | -0.426965619 |
| ENSDART00000058093 | ldlrp1b           | -0.019793679 | -0.383158495 | -0.468203159 | -0.036502488 |
| ENSDART00000058147 | dync2li1          | -0.035887703 | -0.047873047 | -0.361961236 | -0.288662687 |
| ENSDART00000058255 | bbs5              | -0.153890395 | -0.351139568 | -0.380364475 | -0.12338798  |
| ENSDART00000058258 | gng5              | 0.433032497  | 0.476321934  | 0.436326472  | 0.078774872  |
| ENSDART00000058277 | znf800b           | 0.363600272  | 0.378301813  | 0.156623376  | -0.047842936 |
| ENSDART00000058324 | rpz4              | 0.754354311  | 0.61115296   | 0.469864295  | -0.17226809  |
| ENSDART00000058339 | ap3s2             | -0.205243617 | -0.191498501 | -0.306412801 | -0.176311273 |
| ENSDART00000058346 | c1qbp             | 0.293247509  | 0.073830319  | 0.050211764  | 0.059638874  |
| ENSDART00000058370 | arhgap32b         | -0.032405011 | 0.136784851  | 0.285715572  | 0.090147098  |
| ENSDART00000058384 | gapdhs            | -0.42821082  | -0.374069856 | -0.238011978 | -0.087569823 |
| ENSDART00000058415 | zmp:0000001075    | -0.428240629 | -0.582010832 | -0.289943093 | -0.116590577 |
| ENSDART00000058424 | fam46ba           | -0.297360056 | -0.251077248 | -0.176640513 | -0.109784644 |
| ENSDART00000058466 | fgfbp2a           | 0.160228453  | 0.394614467  | 0.900155936  | 0.480238405  |
| ENSDART00000058470 | pik3r1            | -0.272621258 | -0.391826992 | -0.565271638 | -0.177820971 |
| ENSDART00000058484 | cnn3b             | -0.281927631 | -0.203420372 | -0.230407516 | -0.341119299 |
| ENSDART00000058485 | rai14             | 0.377402754  | 0.592516996  | 0.371359301  | 0.056635681  |
| ENSDART00000058574 |                   | 3.231975259  | 2.942133944  | 3.360676782  | 3.717330017  |
| ENSDART00000058605 | scpep1            | 0.659557613  | 0.259300703  | 0.157418507  | -0.140654612 |
| ENSDART00000058628 | ccsapb            | -0.109779777 | -0.249497929 | -0.321372328 | -0.06107705  |
| ENSDART00000058665 | kif20bb           | 0.867797834  | 0.730592963  | 0.371647572  | 0.126469391  |
| ENSDART00000058667 | RDH13 (1 of many) | -0.138024992 | -0.086121321 | -0.690305733 | -0.540517763 |
| ENSDART00000058685 | zfp2a             | -0.080421638 | -0.032548615 | 0.512175645  | 0.757319343  |
| ENSDART00000058706 | fosaa             | -1.574082598 | -1.225695241 | -1.240461281 | -1.154909276 |
| ENSDART00000058736 | grm4              | -0.475368296 | -0.757934708 | -0.299132614 | 0.099413724  |
| ENSDART00000058737 | cdc42l            | 0.49085446   | 0.397672444  | 0.316872224  | -0.053147981 |
| ENSDART00000058773 | rgs16             | -0.222100312 | -0.210502322 | -0.307458084 | -0.014937374 |
| ENSDART00000058774 | havcr1            | 1.378230425  | 0.803624411  | 0.332422006  | 0.11017803   |
| ENSDART00000058785 | fam210ab          | -0.074078069 | -0.284264661 | -0.891770658 | -0.393378695 |
| ENSDART00000058789 | qdpra             | 0.319429593  | 0.277303758  | -0.201013706 | -0.346583237 |
| ENSDART00000058829 | scrt1b            | -0.466509454 | -0.564612343 | -0.054278048 | 0.250358448  |
| ENSDART00000058843 | krcp              | 1.066051129  | 1.030166402  | 0.671597771  | 0.484235506  |
| ENSDART00000058876 | kpn3              | 0.233004274  | 0.111806623  | 0.257484325  | 0.090678098  |
| ENSDART00000058877 | rap2ab            | -0.786170126 | -0.835369537 | -0.021239814 | 0.42494962   |
| ENSDART00000058936 | scamp5b           | -0.278094691 | -0.317619737 | -0.403892079 | -0.134676622 |
| ENSDART00000058955 | arl6ip1           | -0.023708036 | -0.021671154 | -0.307639798 | -0.304733223 |
| ENSDART00000058965 | apoeb             | -0.08755429  | -0.343001804 | -0.600108968 | -0.53348823  |
| ENSDART00000059001 | C5AR1             | 0.862718576  | 0.211750471  | 0.205995335  | 0.011542683  |
| ENSDART00000059003 | rx2               | -0.299942042 | -0.32670005  | -0.113463003 | 0.138106865  |
| ENSDART00000059013 | sec61b            | 0.564454151  | 0.292288284  | 0.352954607  | 0.073391744  |
| ENSDART00000059179 | nptxra            | -0.572157626 | -0.495039684 | -0.356374901 | -0.015079326 |
| ENSDART00000059228 | vil1              | -0.324461409 | -0.136026611 | -0.08718702  | 0.103993243  |
| ENSDART00000059369 | phykpl            | 0.561796588  | 0.786946988  | 0.37392556   | 0.380622564  |
| ENSDART00000059402 | n6amt2            | 0.433448701  | 0.441036405  | 0.122223886  | -0.017461279 |
| ENSDART00000059425 | CU570684.1        | 3.082478322  | 1.756945445  | 2.993403253  | 2.236315825  |
| ENSDART00000059446 | znf385b           | -0.260906147 | -0.315001382 | -0.161772411 | -0.110285684 |
| ENSDART00000059476 | psmg1             | 0.316645081  | 0.323743917  | 0.365248072  | -0.009289235 |
| ENSDART00000059478 | lrrc32            | -0.083635057 | -0.196945688 | -0.286292563 | -0.79945825  |
| ENSDART00000059489 | prmt8b            | -0.385132635 | -0.375733065 | -0.525036565 | 0.065426538  |
| ENSDART00000059550 | lrrc51            | -1.204791639 | -0.640574252 | -1.049736423 | -1.0433072   |

|                    |                   |              |              |              |              |
|--------------------|-------------------|--------------|--------------|--------------|--------------|
| ENSDART00000059586 | spegb             | 0.60633626   | 1.046592342  | 1.773590673  | 1.534849845  |
| ENSDART00000059619 | fkbp14            | 0.418122006  | 0.409098495  | -0.000966617 | 0.084647379  |
| ENSDART00000059631 | BX936415.1        | -0.988751505 | -1.218737364 | -0.343900834 | 0.242173034  |
| ENSDART00000059667 | wdr75             | 0.34735847   | 0.29669502   | 0.189255306  | 0.039773826  |
| ENSDART00000059732 | id1               | -0.232839225 | -0.281205165 | -0.284745791 | -0.436615034 |
| ENSDART00000059756 | ralba             | 0.050810042  | 0.323679093  | 0.529596851  | 0.259207353  |
| ENSDART00000059841 | si:ch211-257p13.3 | -0.713606094 | -0.675183925 | 0.07538087   | 0.401418787  |
| ENSDART00000059869 | adra2a            | -1.042718178 | -0.710015995 | -0.232479367 | 0.220270649  |
| ENSDART00000059955 | ildr1b            | 0.550873694  | 0.893755801  | 0.988897575  | 0.559320969  |
| ENSDART00000059984 | deptor            | -0.356805464 | -0.334367455 | -0.324987791 | -0.320690594 |
| ENSDART00000060001 | pnp6              | -0.139557872 | -0.321502493 | -0.386186078 | -0.030509602 |
| ENSDART00000060005 | rpl32             | 0.348697332  | 0.358910178  | 0.175532175  | 0.008609589  |
| ENSDART00000060015 | chka              | -0.144459192 | -0.274568124 | -0.456317122 | -0.171918553 |
| ENSDART00000060049 | hspa13            | -0.254728034 | -0.327282661 | -0.28629746  | -0.272283731 |
| ENSDART00000060051 | fgf14             | -0.493332703 | -0.385375543 | -0.154886482 | -0.098910242 |
| ENSDART00000060056 | tpi1b             | -0.330637537 | -0.371028005 | -0.31545087  | -0.122811105 |
| ENSDART00000060160 | calb2a            | -1.240040436 | -1.237007367 | -0.232768326 | 0.397108945  |
| ENSDART00000060162 | hsqb1             | 0.08558143   | -0.277493669 | -0.503626412 | -0.55244605  |
| ENSDART00000060174 | jagn1a            | -0.416430339 | -0.038483688 | -0.018273384 | -0.314381472 |
| ENSDART00000060181 | zgc:114174        | 0.760260394  | 1.239485919  | 1.043412191  | 0.428827471  |
| ENSDART00000060184 | chka              | -0.101617548 | -0.321325171 | -0.420229119 | -0.136541498 |
| ENSDART00000060193 | thap3             | 0.219009088  | 0.189913345  | 0.546438828  | 0.599142566  |
| ENSDART00000060251 | wdr18             | 0.292919064  | 0.371056299  | 0.311893069  | 0.087148131  |
| ENSDART00000060255 | blmh              | 0.318055181  | 0.435968503  | 0.441694486  | 0.152219233  |
| ENSDART00000060259 | wnt2              | -0.011888956 | 0.307798324  | -0.019010839 | -1.701804028 |
| ENSDART00000060302 | ddb2              | -0.150084227 | 0.300264829  | -0.452176446 | -0.393222799 |
| ENSDART00000060304 | dhrs13a.3         | -0.00917183  | 0.036729289  | -0.280144118 | -0.407439325 |
| ENSDART00000060321 | RAMP1             | -0.401526014 | -0.370225897 | -0.385056936 | -0.044799362 |
| ENSDART00000060356 | dgkh              | -0.649006381 | -0.810232451 | -0.629585196 | -0.212393687 |
| ENSDART00000060363 | rpl4              | 0.373964359  | 0.396853604  | 0.212646351  | -0.016195336 |
| ENSDART00000060425 | ftf53             | 0.363344395  | 0.103507635  | 1.747305289  | -0.30385669  |
| ENSDART00000060444 | rps29             | 0.369322836  | 0.397792199  | 0.13443893   | -0.022749507 |
| ENSDART00000060532 | zgc:110796        | -0.139659209 | -0.284517331 | -0.33969202  | -0.16468656  |
| ENSDART00000060561 | csdc2a            | -0.084744858 | 0.609682067  | 0.574951056  | 0.285883083  |
| ENSDART00000060576 | myoz1a            | -0.659756236 | 2.254391903  | 2.759775555  | 1.48758278   |
| ENSDART00000060577 | tmem33            | 0.319754096  | 0.307056024  | 0.247854771  | 0.133996431  |
| ENSDART00000060625 | lgi3              | -0.698992604 | -0.869112792 | -0.10986795  | 0.409134057  |
| ENSDART00000060702 | rmdn3             | -0.094193374 | -0.184889649 | -0.247613016 | -0.093111552 |
| ENSDART00000060710 | adgrg11           | 2.568700304  | 0.61302127   | 2.440739962  | 2.102266876  |
| ENSDART00000060714 | atp6ap1a          | -0.204397719 | -0.266136404 | -0.201574338 | -0.008870212 |
| ENSDART00000060718 | taz               | 0.896308653  | 4.991849973  | 1.010024269  | 2.916260354  |
| ENSDART00000060745 | uba52             | 0.32327466   | 0.351581625  | 0.155851402  | -0.01111286  |
| ENSDART00000060765 | nppb              | 4.501656565  | 4.501350371  | 1.812509246  | -0.191856821 |
| ENSDART00000060766 | rab11a            | 0.179968247  | 0.479437298  | 0.674000894  | 0.468733557  |
| ENSDART00000060773 | taar12b           | 2.538886261  | 1.95415769   | 1.735717491  | 1.72259581   |
| ENSDART00000060812 | adcyap1b          | 1.704872196  | 2.272116909  | 1.908485885  | 0.966573225  |
| ENSDART00000060865 | rasal1b           | 1.120636523  | 0.769242819  | 0.458217171  | 0.392656742  |
| ENSDART00000060898 | mrps28            | -0.371192118 | -0.496136281 | -0.011483012 | -0.046106248 |
| ENSDART00000060910 | pimr138           | 0.646921071  | 1.324373168  | 1.239639246  | 0.98486272   |
| ENSDART00000060919 | qars              | 0.348349072  | 0.542908344  | 0.574420452  | 0.306598142  |
| ENSDART00000060938 | snx9b             | 0.471862308  | 0.584797813  | 0.101490869  | -0.223444858 |

|                    |                    |              |              |              |              |
|--------------------|--------------------|--------------|--------------|--------------|--------------|
| ENSDART00000060946 | sgsm1b             | -0.173061984 | -0.355540157 | -0.215401885 | -0.063998625 |
| ENSDART00000060949 | zfpm1              | 0.286528567  | 0.561608339  | 0.375954127  | 0.217874539  |
| ENSDART00000061000 | bbs2               | -0.085680202 | -0.169473458 | -0.253361227 | -0.025608691 |
| ENSDART00000061001 | gnb2l1             | 0.316385721  | 0.345297586  | 0.431111492  | 0.12899342   |
| ENSDART00000061007 | mt2                | -0.024087588 | -0.437804286 | -0.890429121 | -0.686083783 |
| ENSDART00000061106 | bhlhe41            | 0.043056173  | -0.423617996 | -0.754959095 | -0.246095493 |
| ENSDART00000061117 | rrbp1b             | -0.094086695 | 0.04423759   | -0.324207933 | -0.60750175  |
| ENSDART00000061141 | cep85l             | -0.248281327 | -0.136664261 | 0.313311334  | 0.132594592  |
| ENSDART00000061149 | TUBB4A (1 of many) | 0.971780187  | 0.499035917  | 0.545475118  | 0.962590028  |
| ENSDART00000061156 | raph1a             | 0.024271858  | 0.223289034  | 0.290402674  | 0.224778316  |
| ENSDART00000061196 |                    | 0.755433358  | 1.498415514  | 1.365853078  | 0.846252469  |
| ENSDART00000061261 | cx43               | -0.064274202 | -0.132171143 | -0.392515504 | -0.502400185 |
| ENSDART00000061265 | rnf141             | -0.12379903  | -0.215585747 | -0.342006011 | -0.212187704 |
| ENSDART00000061417 | si:ch211-245h14.1  | 0.537591116  | 0.459433616  | 1.387404638  | -0.014689392 |
| ENSDART00000061435 | hsbp1b             | -0.02310974  | -0.083751559 | -0.317854229 | -0.256774332 |
| ENSDART00000061470 | mtss1la            | -0.342228031 | 0.053961203  | 0.113929451  | 0.018495568  |
| ENSDART00000061497 | OLFM4 (1 of many)  | -0.269705239 | -0.443597761 | -0.460075072 | -0.13609298  |
| ENSDART00000061499 | cxcr4b             | 1.134597457  | 1.176774484  | 0.975229504  | 0.34365956   |
| ENSDART00000061523 | il17a/f3           | 0.228114616  | 0.421937628  | 0.621201213  | 0.769032572  |
| ENSDART00000061555 | si:ch211-63o20.7   | 1.506216579  | 0.813490393  | 0.865397342  | 0.102228691  |
| ENSDART00000061633 | zgc:171971         | -0.243215545 | -0.195809688 | -0.289637739 | -0.171793375 |
| ENSDART00000061653 | pebp1              | -0.450366142 | -0.339729586 | -0.205596712 | 0.038256249  |
| ENSDART00000061736 | si:dkey-4e7.3      | 0.80946555   | 0.660586871  | 0.14634027   | 0.03058403   |
| ENSDART00000061745 | inpp4ab            | -0.337306716 | -0.94773917  | -0.831022148 | -0.394471236 |
| ENSDART00000061886 | sema3ab            | -0.067887191 | -0.37217703  | -0.138233187 | 0.034639157  |
| ENSDART00000061926 | stx11b.2           | 3.447906519  | 2.671571656  | 2.785952697  | 1.680276674  |
| ENSDART00000061955 | myl13              | 0.400602979  | 3.991209963  | 4.290518336  | 2.830575983  |
| ENSDART00000062003 | efnb3b             | -0.314139927 | -0.178367777 | 0.04557076   | 0.250001858  |
| ENSDART00000062066 | si:dkey-177p2.6    | -0.250914133 | -0.251912097 | -0.422547135 | -0.291399654 |
| ENSDART00000062073 | BCR (1 of many)    | 0.11359461   | -0.080987241 | -0.284063713 | -0.288348423 |
| ENSDART00000062143 | zgc:77650          | -0.109887255 | -0.133378465 | -0.376117658 | -0.331935654 |
| ENSDART00000062150 | zgc:77752          | -0.401367403 | -0.150322453 | -0.162634546 | -0.096457711 |
| ENSDART00000062181 | RALGDS             | -0.386705371 | -0.180287867 | -0.473841885 | -0.479084169 |
| ENSDART00000062185 | rab40b             | -0.04766047  | 0.014828604  | -0.304246935 | -0.082657522 |
| ENSDART00000062220 | gstt1a             | 1.233095877  | 1.492566267  | 1.464760691  | 0.555034442  |
| ENSDART00000062229 | p2rx7              | 0.280693894  | 0.946609864  | 0.955265868  | 0.573409065  |
| ENSDART00000062257 | slc39a1            | 0.740781667  | 0.522946282  | 0.350404642  | 0.245154327  |
| ENSDART00000062360 | nup205             | 0.380838378  | 0.174863772  | 0.543980624  | 0.366347355  |
| ENSDART00000062383 | ywhaqa             | -0.013489826 | 0.266644821  | 0.309888274  | 0.200982907  |
| ENSDART00000062402 | tpd52l1            | -0.180007689 | -0.341056198 | -0.772074089 | -0.368132956 |
| ENSDART00000062403 | tmem9              | -0.368514764 | -0.231056659 | -0.311288279 | -0.066743785 |
| ENSDART00000062518 | gstr               | -0.173225499 | -0.241367808 | -0.232576695 | -0.339957813 |
| ENSDART00000062551 | cyp51              | 0.018772193  | 0.850105191  | 1.080881624  | 0.554137375  |
| ENSDART00000062552 | wtap               | -0.338047264 | -0.227200913 | -0.06961558  | -0.130824995 |
| ENSDART00000062556 | sod2               | -0.183508685 | -0.287491323 | -0.424543766 | -0.237833299 |
| ENSDART00000062560 | zgc:77784          | 0.130172136  | 0.171187774  | 0.614861949  | 0.368542156  |
| ENSDART00000062576 | thyn1              | 0.902996379  | 0.741810201  | 0.792519989  | 0.219218083  |
| ENSDART00000062587 | klf2a              | 0.563534905  | 1.202186524  | 1.977026531  | 0.968508443  |
| ENSDART00000062603 | cadm1b             | -0.182938767 | -0.538377364 | -0.267052947 | -0.164493851 |
| ENSDART00000062633 | s1pr1              | -0.300458433 | -0.0458986   | -0.017104561 | -0.199608488 |
| ENSDART00000062671 | tuba8l             | 1.253108099  | 0.545680562  | 0.42270127   | -0.336104805 |

|                    |                |              |              |              |              |
|--------------------|----------------|--------------|--------------|--------------|--------------|
| ENSDART00000062697 | gfra2a         | -0.450482933 | -0.554254218 | -0.069449306 | -0.130685043 |
| ENSDART00000062704 | plaa           | 0.222653649  | 0.333324552  | 0.491597491  | 0.251933193  |
| ENSDART00000062727 | stx6           | -0.088840172 | -0.113781331 | -0.247667952 | -0.166950515 |
| ENSDART00000062736 | coasy          | -0.31852882  | -0.407402551 | -0.404610538 | -0.370618301 |
| ENSDART00000062761 | cnstb          | -0.361465575 | -0.117860324 | 0.271149791  | 0.383194937  |
| ENSDART00000062845 | mmp9           | 2.08287012   | 1.917473556  | 1.298502519  | -0.06470518  |
| ENSDART00000062850 | agps           | 0.085764498  | 0.319290218  | 0.455652831  | 0.366743535  |
| ENSDART00000062874 | atp1b3b        | -0.415562805 | -0.319287363 | -0.078895256 | 0.137689897  |
| ENSDART00000062887 | disp2          | -0.441631902 | -0.296469901 | 0.444242177  | 0.781646932  |
| ENSDART00000062908 | rpl7l1         | 0.414752526  | 0.336818546  | 0.137726222  | -0.109457063 |
| ENSDART00000062931 | abracl         | 0.878200021  | 0.73529721   | 0.710676136  | 0.289919909  |
| ENSDART00000062935 | heca           | -0.371152131 | -0.569989768 | -0.691744059 | -0.51577268  |
| ENSDART00000062983 | rpl10a         | 0.388498934  | 0.402298329  | 0.17374506   | -0.059011317 |
| ENSDART00000063008 | mfng           | 0.785568878  | 0.314558937  | 0.02546364   | -0.36422945  |
| ENSDART00000063071 | dgcr2          | -0.097084868 | -0.122785849 | -0.277264164 | -0.131322908 |
| ENSDART00000063081 | cyp2ad3        | 0.42839208   | 0.705423845  | 0.252750259  | 0.171232166  |
| ENSDART00000063107 | cyp2p7         | 0.910849098  | 1.165275545  | 0.616791402  | -0.023701278 |
| ENSDART00000063151 | napga          | 0.319825484  | 0.237345685  | 0.317095517  | 0.164414652  |
| ENSDART00000063251 | ctsz           | 1.117383701  | 0.530773826  | 0.448185866  | 0.142841944  |
| ENSDART00000063337 | cdca8          | 2.552618125  | 1.809029687  | 2.257850367  | 1.156797598  |
| ENSDART00000063357 | ccnb1          | 1.564145903  | 1.350801576  | 0.91228963   | 0.49209964   |
| ENSDART00000063359 | ucp3           | 0.449516929  | 0.816201403  | 1.070983817  | 0.155240874  |
| ENSDART00000063418 | nsun5          | 0.551107756  | 0.480901258  | 0.442024494  | 0.196344317  |
| ENSDART00000063478 | nfil3-2        | -0.375816946 | 0.376110137  | 0.458578211  | 0.007201456  |
| ENSDART00000063551 | ppm1e          | -0.4375512   | -0.67599947  | -0.28655858  | -0.160579724 |
| ENSDART00000063564 | nmu            | -0.490206998 | -0.305049777 | -0.445855788 | -0.16147485  |
| ENSDART00000063625 | gpx3           | 0.093413749  | 0.050792899  | -0.431389541 | -0.288399492 |
| ENSDART00000063648 | nck2b          | -0.186136113 | -0.294499599 | 0.095653682  | 0.163593769  |
| ENSDART00000063703 | si:dkey-71h2.2 | -0.547517928 | -0.696070326 | -0.446988451 | -0.222080286 |
| ENSDART00000063704 | crip3          | -0.295432006 | -0.264072284 | -0.393391872 | -0.087537117 |
| ENSDART00000063706 | fn dc4a        | -0.898991439 | -1.194204845 | -0.829294946 | -0.104966589 |
| ENSDART00000063714 | rapgef6        | -0.363328977 | -0.303671651 | 0.266966568  | 0.457046047  |
| ENSDART00000063725 | xkr6b          | -0.377201403 | -0.64365216  | 0.065079126  | -0.045638513 |
| ENSDART00000063764 | si:dkey-5n18.1 | 1.420288455  | 0.932190706  | 0.716992196  | -0.355341421 |
| ENSDART00000063779 | efhd1          | -0.527832136 | -0.620416333 | -0.244685479 | -0.230757866 |
| ENSDART00000063781 | gpr55a         | 3.100202316  | 2.329994693  | 2.002857636  | 2.112952219  |
| ENSDART00000063783 | itm2ca         | -0.362486731 | -0.282712517 | -0.07258841  | 0.153576522  |
| ENSDART00000063786 | cab39          | -0.24368294  | -0.258313334 | -0.267466597 | -0.001027932 |
| ENSDART00000063804 | wu:fj39g12     | -1.205265642 | -1.354971991 | -1.517691105 | -1.318916155 |
| ENSDART00000063816 | kcnk3a         | -0.460164643 | -0.659361375 | -0.48206205  | -0.175491486 |
| ENSDART00000063817 | ndufb11        | -0.172664849 | -0.275426505 | -0.329160032 | -0.102461652 |
| ENSDART00000063825 | sprn           | -0.451586162 | -0.272184034 | -0.06406637  | 0.092302795  |
| ENSDART00000063832 | rbbp8          | -0.238022634 | -0.227071096 | 0.03579094   | -0.764989117 |
| ENSDART00000063835 | otx5           | -0.207695123 | -0.226833273 | -0.417236259 | -0.126675877 |
| ENSDART00000063870 | rpl11          | 0.4298733    | 0.509956948  | 0.251365855  | 0.019450433  |
| ENSDART00000063874 | vamp4          | 0.706049434  | 0.688342777  | 0.412447235  | 0.06985511   |
| ENSDART00000063912 | jun            | 1.166146477  | 1.429328618  | 1.29995447   | 0.480560375  |
| ENSDART00000063938 | mast1a         | 0.148358744  | 0.555318149  | 1.032634027  | 1.008672267  |
| ENSDART00000063944 | tmem30ab       | -0.052321591 | -0.186777496 | -0.351757869 | -0.167369044 |
| ENSDART00000063950 | psmc1b         | 0.214901771  | 0.338782243  | 0.27453656   | 0.103637979  |
| ENSDART00000063953 | zgc:65997      | 0.11562047   | 0.484476273  | -0.11592626  | -0.024456549 |

|                    |            |              |              |              |              |
|--------------------|------------|--------------|--------------|--------------|--------------|
| ENSDART00000064012 | ca4a       | -0.265180291 | -0.250252223 | -0.144355238 | 0.018302985  |
| ENSDART00000064017 | rapgef1a   | 0.181570205  | 0.344922552  | 0.212193731  | 0.084768062  |
| ENSDART00000064032 | eif4ebp1   | 0.426193835  | 0.395196044  | 0.352513449  | 0.114800609  |
| ENSDART00000064067 | ehbp1      | 0.439358276  | 0.535882532  | 0.636938582  | 0.35957066   |
| ENSDART00000064111 | faub       | 0.024926044  | -0.061766338 | -0.402186419 | -0.29870419  |
| ENSDART00000064112 | glrx5      | -0.15774683  | -0.2561987   | -0.313570229 | -0.138985623 |
| ENSDART00000064113 | abt1       | 0.598506286  | 0.454995795  | 0.386684419  | 0.116646594  |
| ENSDART00000064130 | BEGAIN     | -0.586123435 | -0.609324776 | -0.400772811 | -0.09647247  |
| ENSDART00000064241 | nrxn3a     | -0.593329637 | -0.86602502  | -0.45366796  | -0.193651725 |
| ENSDART00000064311 | arhgdia    | 0.49745023   | 0.520698759  | 0.529544756  | 0.127344369  |
| ENSDART00000064375 | tmem244    | -0.163876969 | -0.255273585 | -0.331911996 | -0.04221405  |
| ENSDART00000064376 | sod1       | -0.248477917 | -0.212122084 | -0.427881094 | -0.390078569 |
| ENSDART00000064403 | nptnb      | -0.282191976 | -0.43563203  | -0.351497687 | -0.147485108 |
| ENSDART00000064462 | psma6l     | 0.604857346  | 0.425092318  | 0.840213456  | -0.035624292 |
| ENSDART00000064468 | crmp1      | -0.244499065 | -0.053767261 | 0.158838362  | 0.344619203  |
| ENSDART00000064509 | stmn4l     | 2.57043941   | 3.576220537  | 3.295095816  | 2.31833518   |
| ENSDART00000064511 | il17a/f1   | 1.319538931  | 1.072672417  | 0.769667562  | 1.083526716  |
| ENSDART00000064581 | kcnip3b    | -1.323762559 | -2.171156238 | -0.883181569 | 0.0425137    |
| ENSDART00000064657 | stx11a     | 1.187636483  | 0.704469765  | 0.33181163   | -0.135694961 |
| ENSDART00000064662 | rassf2b    | -0.5330742   | -0.904631137 | -0.740838414 | -0.317057253 |
| ENSDART00000064666 | prnpb      | 1.397742128  | 1.699664466  | 1.642053833  | 0.642245778  |
| ENSDART00000064672 |            | -1.010331454 | -0.756315191 | -0.126164495 | 0.278123254  |
| ENSDART00000064700 | fuca2      | 0.436466876  | 0.137195427  | -0.005101419 | -0.171105064 |
| ENSDART00000064738 | atpif1b    | -0.12884804  | -0.286001583 | -0.530012586 | -0.266598201 |
| ENSDART00000064739 | rpl13a     | 0.411158528  | 0.410041852  | 0.123606951  | -0.078504495 |
| ENSDART00000064789 | txn        | 1.421742139  | 1.973125     | 1.39538042   | 0.274434823  |
| ENSDART00000064798 | aspn       | 0.856747155  | 1.499777714  | 1.699781764  | 0.582997672  |
| ENSDART00000064805 | cenpp      | 0.292664259  | 0.48497191   | 0.107661064  | -0.056951786 |
| ENSDART00000064826 | mov10a     | 0.329642907  | 0.141820564  | 0.774895549  | -0.030140661 |
| ENSDART00000064833 | mafaa      | -0.957052225 | -1.143383392 | -0.379735148 | 0.067354966  |
| ENSDART00000064842 | padi2      | -0.110475283 | -0.200123181 | -0.394420172 | -0.195593685 |
| ENSDART00000064860 | rbms1a     | -0.125610759 | 0.088275426  | 0.5443086    | 0.313591986  |
| ENSDART00000064866 | prkab1a    | -0.370484412 | -0.353103565 | -0.349388814 | -0.328698623 |
| ENSDART00000064878 | gxylt2     | -0.088947943 | -0.180342387 | -0.380560197 | -0.388684923 |
| ENSDART00000064902 | ssbp4      | -0.349245142 | -0.241492171 | 0.147485085  | 0.214650497  |
| ENSDART00000064913 | fto        | -0.098234146 | -0.428383355 | -0.257568512 | -0.239748235 |
| ENSDART00000064968 | rasgef1bb  | 0.10103678   | 0.334291276  | 0.155368522  | -0.094945106 |
| ENSDART00000065057 | itgb7      | 1.200094562  | 0.885337917  | 0.497721229  | 0.006866552  |
| ENSDART00000065097 | dpysl3     | -0.247117182 | 0.32883927   | 0.696704704  | 0.442557487  |
| ENSDART00000065132 | zgc:171740 | -0.488981736 | -0.378281723 | 0.139236952  | 0.2855891    |
| ENSDART00000065143 | unc119b    | -0.086346577 | -0.282642438 | -0.651558775 | -0.265879719 |
| ENSDART00000065159 | zgc:158291 | -1.165646756 | -0.784542684 | 0.443310678  | 0.751149417  |
| ENSDART00000065183 | cldn2      | 0.624880574  | 0.284479914  | -0.382379938 | -0.379228488 |
| ENSDART00000065208 | nop16      | 0.539941841  | 0.465464987  | 0.330311237  | 0.01578578   |
| ENSDART00000065228 | csmd1a     | -0.138553555 | -0.429039185 | -0.109478646 | 0.118637902  |
| ENSDART00000065264 | cdca5      | 0.52809349   | 0.795495163  | 0.547641137  | 0.341339334  |
| ENSDART00000065337 | kif20a     | 1.518648505  | 1.334799108  | 0.992824147  | 0.572892998  |
| ENSDART00000065356 | desmb      | 0.665915236  | 0.890084527  | 0.800282347  | 0.503228927  |
| ENSDART00000065361 | etv5b      | -0.645686026 | -0.347502384 | -0.293939032 | -0.317696675 |
| ENSDART00000065366 | st6gal1    | -0.520593433 | -0.711298232 | -0.60540202  | -0.072634403 |
| ENSDART00000065372 | kcnj3b     | -0.605628976 | -0.778191304 | -0.104344748 | 0.360074992  |



|                    |                  |              |              |              |              |
|--------------------|------------------|--------------|--------------|--------------|--------------|
| ENSDART00000065373 | eef1b2           | 0.250630086  | 0.293877839  | 0.677481758  | 0.365569434  |
| ENSDART00000065380 | camk1ga          | -0.057459289 | -0.334433278 | -0.359469575 | -0.058443268 |
| ENSDART00000065397 | fkbp2            | 0.018660881  | -0.129009813 | -0.324870267 | -0.155859325 |
| ENSDART00000065420 | pac31a           | -0.146340142 | -0.310676632 | -0.118017371 | -0.142794888 |
| ENSDART00000065467 | dedd1            | -0.00326722  | -0.100306912 | -0.35251663  | -0.041277003 |
| ENSDART00000065495 | emp2             | 0.342641107  | 0.530182619  | 0.397727804  | 0.205643264  |
| ENSDART00000065500 | abcc4            | 0.484659612  | 0.306343643  | -0.287697763 | -0.373355455 |
| ENSDART00000065507 | plppr2b          | -0.22717931  | -0.353326082 | -0.20008884  | 0.028481334  |
| ENSDART00000065551 | zak              | 1.359635484  | 2.260289477  | 1.621487921  | 0.736191985  |
| ENSDART00000065563 | ccdc90b          | 0.430098539  | 0.770932327  | 0.278586215  | 0.111905478  |
| ENSDART00000065567 | guca1d           | -0.53307102  | -0.365098729 | -0.535522544 | -0.275955769 |
| ENSDART00000065599 | cadm1a           | -0.54681119  | -0.778847768 | -0.187580903 | 0.116530415  |
| ENSDART00000065600 | sc5d             | -0.12560715  | 0.619273704  | 0.802648489  | 0.437253012  |
| ENSDART00000065664 | dusp4            | -0.466715295 | -0.312689089 | -0.30035434  | -0.446313481 |
| ENSDART00000065674 | fybb             | 0.68375018   | 0.334314613  | 0.079534024  | -0.242430054 |
| ENSDART00000065728 | nrsn1            | 0.207141455  | 0.540557286  | 0.398847193  | 0.186515655  |
| ENSDART00000065755 | gpn3             | -0.172157475 | -0.155442383 | -0.381057864 | -0.19097226  |
| ENSDART00000065805 | tspan10          | 0.90782785   | 0.406843364  | -0.022479662 | -0.576522773 |
| ENSDART00000065807 | kctd13           | 0.261042411  | 0.352189581  | 0.50608049   | 0.336398415  |
| ENSDART00000065817 | pou5f3           | 1.443769101  | 1.494882152  | 0.928756649  | 0.660724256  |
| ENSDART00000065818 | fut7             | 0.972435403  | 0.738351     | 0.320621995  | -0.576532021 |
| ENSDART00000065853 | dhrs3b           | -0.214859587 | -0.196724114 | -0.346466706 | -0.463603398 |
| ENSDART00000065929 | hs6st3b          | -0.878348455 | -0.942691234 | -0.255367675 | 0.253670478  |
| ENSDART00000066177 | tuba2            | -0.341980556 | 0.290211936  | 0.695639518  | 0.704284087  |
| ENSDART00000066192 | glra2            | -0.5075286   | -0.700662657 | -0.376893165 | 0.421840665  |
| ENSDART00000066198 | rab9a            | 0.076150809  | 0.228460008  | 0.322859875  | 0.206383991  |
| ENSDART00000066230 | ARL3 (1 of many) | -0.707746447 | -0.419158458 | -0.489675877 | -0.206340441 |
| ENSDART00000066256 | vti1a            | -0.147124368 | -0.216073091 | -0.331785573 | -0.195609352 |
| ENSDART00000066259 | kcnk1a           | -0.289802216 | -0.227947241 | -0.67177     | -0.392395516 |
| ENSDART00000066269 | arl4d            | -0.431926082 | -0.429953919 | -0.294676093 | -0.224713874 |
| ENSDART00000066288 | spata20          | -0.009504348 | -0.162892766 | -0.35319246  | -0.173028944 |
| ENSDART00000066290 | UTS2R            | -0.720663714 | -0.982454784 | -0.512077429 | -0.545080013 |
| ENSDART00000066294 | cdk5r1b          | -0.511562763 | -0.495240798 | 0.085364893  | 0.188592346  |
| ENSDART00000066372 | id4              | -0.719733282 | -0.518590484 | 0.441847928  | 0.655214602  |
| ENSDART00000066373 | vdac1            | -0.316380085 | -0.269111014 | -0.266508034 | -0.031245506 |
| ENSDART00000066380 | ca7              | -0.236035328 | -0.017625204 | -0.765902599 | -0.026455411 |
| ENSDART00000066382 | aqp8a.1          | -0.164652843 | -0.325293072 | -0.493634593 | -0.109118528 |
| ENSDART00000066385 | hbz              | 0.819612283  | 1.064127771  | 1.5494854    | 0.440895582  |
| ENSDART00000066386 | shisa9a          | -0.462438855 | -0.347473048 | -0.310604934 | -0.078066291 |
| ENSDART00000066389 | tmem184ba        | -0.204152722 | -0.333415893 | -0.147371729 | -0.097737372 |
| ENSDART00000066391 | csnk1e           | 0.01172114   | 0.595315231  | 0.792117229  | 0.433182971  |
| ENSDART00000066411 | dlgap5           | 1.041688171  | 0.895823709  | 0.540002804  | 0.33349173   |
| ENSDART00000066471 | adam8b           | 1.018895271  | 1.190253553  | 1.122506289  | 0.517972783  |
| ENSDART00000066477 | dkk1b            | -0.674554346 | -1.187574562 | -0.676297256 | -1.09065776  |
| ENSDART00000066506 | cox6b1           | 0.122510297  | 0.115648463  | 0.536625345  | 0.628910558  |
| ENSDART00000066590 | rdh12l           | 0.806755691  | 0.842269039  | 0.848807771  | 0.120108035  |
| ENSDART00000066623 | st8sia3          | -0.182339116 | -0.349623634 | -0.081530336 | -0.065322773 |
| ENSDART00000066625 | smpx             | 0.108625243  | 0.797810146  | 1.548262684  | 1.15135764   |
| ENSDART00000066655 | mybl1            | -0.255810306 | -0.487313899 | -0.72749049  | -0.668391364 |
| ENSDART00000066703 | rdh10a           | -0.287660525 | -0.158056129 | -0.356819377 | -0.262167994 |
| ENSDART00000066733 | gpr22b           | -0.9723222   | -1.512791135 | -0.598895258 | -0.577277225 |

|                    |                  |              |              |              |              |
|--------------------|------------------|--------------|--------------|--------------|--------------|
| ENSDART00000066760 | cct5             | 0.325276039  | 0.436851681  | 0.379245954  | 0.163513221  |
| ENSDART00000066765 | bmi1a            | 3.316489868  | 2.947911885  | 2.359801458  | 2.244842944  |
| ENSDART00000066778 | acad11           | 0.796145744  | 0.566674022  | 0.216041695  | -0.190350168 |
| ENSDART00000066784 | fam49bb          | 0.049871707  | -0.095277519 | -0.294897796 | -0.151467176 |
| ENSDART00000066794 | otulina          | 0.468513579  | 0.440716075  | 0.351949179  | 0.239625569  |
| ENSDART00000066839 | slc35g2b         | -0.671846523 | -0.750415444 | -0.309110396 | 0.04424778   |
| ENSDART00000066895 | rassf8b          | -0.275713104 | -0.148423362 | -0.148246743 | -0.166873018 |
| ENSDART00000066896 | syt1a            | -0.255336633 | -0.349305824 | -0.330024338 | -0.178637525 |
| ENSDART00000066963 | atp6v1f          | -0.089791813 | -0.169571399 | -0.304106913 | -0.234245815 |
| ENSDART00000066975 | impdh1b          | 0.195914466  | 0.339716801  | 0.56808711   | 0.477613078  |
| ENSDART00000066997 | dram1            | 0.801491354  | 0.536766251  | 0.146394385  | -0.606440034 |
| ENSDART00000066999 | ccdc53           | 0.300412133  | 0.290286375  | 0.140411091  | 0.00256916   |
| ENSDART00000067005 | bcat1            | -0.064708558 | -0.22197643  | -0.301840187 | -0.097404482 |
| ENSDART00000067053 | vta1             | 0.2430424    | 0.457630564  | 0.367763165  | 0.149685321  |
| ENSDART00000067059 | fam19a5b         | -0.282093441 | -0.382553277 | -0.381033174 | -0.505286252 |
| ENSDART00000067066 | parp6b           | -0.443166413 | 0.101161009  | 0.402103535  | 0.516387314  |
| ENSDART00000067078 | plekhg5a         | -0.147306721 | -0.274518319 | -0.555343847 | -0.255866929 |
| ENSDART00000067082 | clta             | -0.242881724 | -0.298079508 | -0.220247727 | -0.021275929 |
| ENSDART00000067147 | ANKRD50          | 0.122102324  | 0.471943767  | 0.546358337  | 0.270036712  |
| ENSDART00000067168 | pdzrn4           | 0.330865082  | 1.464493171  | 1.433744497  | 0.793719225  |
| ENSDART00000067190 | tspan9b          | -0.605960388 | -0.476716761 | -0.251844268 | -0.266924971 |
| ENSDART00000067193 | adm2a            | 0.4356689    | 0.184728608  | -0.002686414 | -1.106691874 |
| ENSDART00000067211 | gpr37l1b         | -0.390917116 | -0.36533905  | -0.206436073 | -0.113142613 |
| ENSDART00000067239 | guca1g           | -0.979413995 | -1.042352228 | -1.597708164 | -1.275542792 |
| ENSDART00000067258 | syt10            | -0.290010761 | -3.233857576 | -0.084108756 | -0.40009033  |
| ENSDART00000067312 | si:dkey-106n21.1 | 0.584969753  | 0.102146183  | -0.031661382 | 0.069325035  |
| ENSDART00000067324 | mfge8b           | -0.041376155 | -0.13672935  | -0.391535511 | -0.353629136 |
| ENSDART00000067327 | abhd2b           | 0.159640353  | 0.698443956  | 0.611964225  | 0.750739323  |
| ENSDART00000067362 | cart2            | -0.749355761 | -0.384853037 | -0.719287733 | -0.625188951 |
| ENSDART00000067427 | yeats4           | 0.136322543  | 0.363843408  | 0.318943581  | 0.037728114  |
| ENSDART00000067434 | nudt4b           | -0.510387585 | -0.468486348 | -0.329729048 | -0.412952232 |
| ENSDART00000067446 | slc38a4          | -0.251589327 | -0.331078479 | -0.606665517 | -0.538910759 |
| ENSDART00000067448 | acat1            | -0.217922513 | -0.251881532 | -0.396031362 | -0.209577052 |
| ENSDART00000067461 | si:ch211-152c2.3 | -0.474479692 | -0.343258906 | -0.010850784 | 0.158497108  |
| ENSDART00000067478 | pkp3a            | 0.648319477  | 0.895152082  | 2.33162898   | 0.940793267  |
| ENSDART00000067500 | si:dkey-280e21.3 | 0.421024272  | 0.822626751  | 0.979586691  | 0.632877181  |
| ENSDART00000067510 | crabp1a          | -0.186487239 | -0.41656224  | -0.606281006 | -0.420918895 |
| ENSDART00000067512 | psma4            | 0.210284594  | 0.22504456   | 0.324917099  | 0.119970251  |
| ENSDART00000067514 | rbpms2a          | -1.175610868 | -1.156235961 | 0.045281157  | 0.593799851  |
| ENSDART00000067531 | syn2a            | -0.50370548  | -0.414636803 | -0.227904446 | 0.132370635  |
| ENSDART00000067537 | elovl6l          | 0.404046488  | 1.053095893  | 1.924314262  | 1.109723769  |
| ENSDART00000067542 | kcnk10b          | 2.685681832  | 3.478119742  | 3.471523284  | 2.49042133   |
| ENSDART00000067594 | cst14b.1         | 1.003408293  | 1.132156972  | 0.601894798  | 0.102871452  |
| ENSDART00000067599 | angptl2a         | 1.671461404  | 1.166310219  | 0.762115684  | 0.407368061  |
| ENSDART00000067637 | dstyk            | -0.298992266 | -0.18939574  | -0.18546883  | -0.220617575 |
| ENSDART00000067678 | zgc:110339       | 0.949255799  | 0.562708107  | 0.125395868  | -0.585210787 |
| ENSDART00000067733 | zgc:77838        | -0.192172111 | -0.379046905 | -0.170230593 | -0.131538824 |
| ENSDART00000067741 | cacng6b          | -2.498204907 | -1.377375045 | -1.107680653 | -1.191335449 |
| ENSDART00000067762 | MYO1D            | -0.207118869 | -0.403579734 | -0.286614596 | -0.314212256 |
| ENSDART00000067764 | stk17a           | -0.185636748 | -0.198053553 | -0.515379898 | -0.253038095 |
| ENSDART00000067776 | rab10            | 0.291742266  | 0.421774457  | 0.459760968  | 0.189497347  |

|                    |                    |              |              |              |              |
|--------------------|--------------------|--------------|--------------|--------------|--------------|
| ENSDART00000073405 | zgc:173552         | 0.695539535  | 0.568218274  | 1.113411469  | 0.383673074  |
| ENSDART00000073452 | si:ch211-113a14.12 | 0.801955974  | 0.847093718  | 0.855214481  | 0.503313711  |
| ENSDART00000073462 | rplp0              | 0.408607572  | 0.593255771  | 0.47280039   | 0.165347026  |
| ENSDART00000073500 | ptprz1a            | -0.320567664 | -0.32912405  | -0.255947625 | -0.47902768  |
| ENSDART00000073511 | hyal6              | -0.14022603  | -0.303368807 | -0.413603406 | -0.552708783 |
| ENSDART00000073564 | tes                | 0.818084026  | 1.011033966  | 0.902633694  | 0.089277909  |
| ENSDART00000073583 | islr2              | 0.313523936  | 1.12325114   | 1.332162091  | 1.179316934  |
| ENSDART00000073588 | kcnj11             | -0.465815764 | -0.671487298 | -0.425150531 | -0.293255153 |
| ENSDART00000073617 | opn4xa             | -0.377358091 | -0.474333233 | -0.655013246 | -0.269116892 |
| ENSDART00000073634 | slc30a5            | -0.005479497 | -0.126675199 | -0.24346742  | -0.137800332 |
| ENSDART00000073694 | smu1b              | -0.023572641 | -0.696487436 | -0.934479138 | -0.393819626 |
| ENSDART00000073705 | abcf1              | 0.284347738  | 0.522430424  | 0.46970431   | 0.327069748  |
| ENSDART00000073726 | cav2               | -0.135895339 | 0.080426407  | -0.366803726 | -0.546607126 |
| ENSDART00000073735 | rrad               | 0.475668516  | 0.908053908  | 0.772751604  | 0.279273357  |
| ENSDART00000073846 | si:ch211-122f10.4  | 0.620706192  | 0.26696454   | 0.219379439  | -0.011733355 |
| ENSDART00000073861 | gabarapb           | -0.042475311 | -0.021227012 | -0.297506188 | -0.271766658 |
| ENSDART00000073903 | crtc3              | -0.232649231 | -0.295606215 | -0.176321155 | -0.096709861 |
| ENSDART00000073919 | kcnc1b             | -0.758440974 | -0.784989596 | -0.33092052  | 0.322314215  |
| ENSDART00000073932 |                    | 0.121194935  | -0.376988949 | -0.788016576 | -0.265683315 |
| ENSDART00000073936 | acvr1bb            | -0.291123202 | -0.390021531 | -0.349875902 | -0.253586872 |
| ENSDART00000073950 | olfm1a             | -0.852827208 | -0.587563633 | 0.013637392  | 0.435090193  |
| ENSDART00000073970 | uap1               | 0.430311379  | 0.939111864  | 0.868311508  | 0.206630788  |
| ENSDART00000073981 | eif2s1b            | 0.229006291  | 0.299741922  | 0.510349465  | 0.185458194  |
| ENSDART00000073985 | rbfox2             | -0.063885036 | 0.156691707  | 0.429046907  | 0.332565675  |
| ENSDART00000074010 | ubald1b            | 0.486188172  | 0.523878559  | 0.246068485  | 0.014830353  |
| ENSDART00000074036 | rcvrna             | -0.553376367 | -0.06531313  | -0.11758335  | -0.07626787  |
| ENSDART00000074070 | aff2               | -0.074830038 | -0.283904996 | -0.159789643 | -0.147467133 |
| ENSDART00000074099 | cabp2b             | -0.664167129 | -0.641383476 | -0.676380934 | -0.590070868 |
| ENSDART00000074100 | osgn1              | 0.255332714  | 0.013078065  | -0.613186841 | -0.487873824 |
| ENSDART00000074117 | aspa               | -0.032383232 | -0.304124913 | -0.397629458 | -0.358898864 |
| ENSDART00000074161 | slc4a2b            | 0.481685785  | 0.057728735  | -0.200942778 | -0.247347753 |
| ENSDART00000074212 | scrib              | 0.155467238  | 0.226272134  | 0.329350211  | 0.126740521  |
| ENSDART00000074317 | GSK3B (1 of many)  | 0.32408852   | 0.570538304  | 0.615748631  | 0.310967098  |
| ENSDART00000074362 | pcdh18b            | -0.440881831 | -0.447646282 | -0.227758863 | 0.176890552  |
| ENSDART00000074380 | tsga10             | -0.358572407 | -0.32335115  | -0.582555062 | -0.41305108  |
| ENSDART00000074384 | stx4               | 0.365157378  | 0.335603422  | 0.150714004  | -0.050227712 |
| ENSDART00000074400 | tia1               | 0.181056891  | 0.310121029  | 0.46787956   | 0.221267203  |
| ENSDART00000074438 | cenpi              | 0.547415003  | 0.708397465  | 0.401862169  | 0.054393549  |
| ENSDART00000074458 | ptpmt1             | -0.138560892 | -0.279060294 | -0.535667209 | -0.518833125 |
| ENSDART00000074543 | hs3st4             | -0.453389419 | -0.572006435 | -0.310659668 | 0.002760951  |
| ENSDART00000074609 | suclg1             | -0.204210404 | -0.293159601 | -0.171956898 | 0.002164837  |
| ENSDART00000074678 | chrnb3a            | -0.683036397 | -0.585209438 | -0.069659384 | 0.207417172  |
| ENSDART00000074685 | glrbb              | -0.387255204 | -0.421576892 | -0.370807969 | -0.094075713 |
| ENSDART00000074689 | eif5b              | 0.118742051  | 0.204941132  | 0.292461428  | 0.069777195  |
| ENSDART00000074698 | opn3               | -0.589287895 | -0.235981184 | 0.224725485  | -0.032745726 |
| ENSDART00000074718 | spire1b            | -0.446651583 | -0.478750814 | -0.155393912 | -0.07838085  |
| ENSDART00000074786 | ctso               | 0.33157854   | 0.154941794  | -0.070268612 | -0.012066877 |
| ENSDART00000074838 | kcnk3b             | -0.808453975 | -0.995140212 | -0.30053552  | -0.689829672 |
| ENSDART00000074924 | mbnl1              | 0.32889023   | 0.277718787  | 0.642145523  | 0.211541009  |
| ENSDART00000074936 | gabrr2a            | -0.375623148 | -0.534637844 | -0.431940406 | -0.359950744 |
| ENSDART00000074950 | slc25a28           | -0.022495638 | -0.038026223 | -0.243484898 | -0.120098609 |

|                    |                  |              |              |              |              |
|--------------------|------------------|--------------|--------------|--------------|--------------|
| ENSDART00000074959 | slc35f1          | -0.294905966 | -0.396956867 | -0.318533983 | -0.137876179 |
| ENSDART00000074960 | cd22             | 0.815723271  | 0.646940316  | 0.539427268  | -0.232061943 |
| ENSDART00000074979 | rnft2            | 0.06664962   | 0.449659345  | 0.588779493  | 0.279626887  |
| ENSDART00000074997 | CU302436.3       | -0.857583363 | -0.990723788 | -0.187854306 | 0.199234775  |
| ENSDART00000075009 | EIF2S2           | 0.324008789  | 0.419532633  | 0.338652657  | 0.07614456   |
| ENSDART00000075028 | rps11            | 0.42100484   | 0.441088802  | 0.128015907  | -0.080449898 |
| ENSDART00000075039 | gOSR2            | 0.009731507  | 0.24829488   | 0.212269525  | -0.090945666 |
| ENSDART00000075070 | hsf2             | -0.066635095 | -0.276496416 | -0.474097609 | -0.186498896 |
| ENSDART00000075092 | pkib             | -0.08506216  | -0.264513554 | -0.401500984 | -0.212860417 |
| ENSDART00000075112 | clvs2            | 0.165980729  | 0.346379383  | 0.75563827   | 0.535875063  |
| ENSDART00000075116 | si:dkey-148a17.6 | 0.841894804  | 0.387365318  | 0.191323415  | -0.035438886 |
| ENSDART00000075123 | pcp4a            | -0.598752351 | -0.632528063 | -0.40265776  | -0.022235336 |
| ENSDART00000075129 | lrrc47           | 0.095574868  | 0.246973338  | 0.327055852  | 0.135309168  |
| ENSDART00000075150 | bmp4             | -0.321654174 | -0.192558055 | -0.354985644 | -0.520317573 |
| ENSDART00000075172 | cttnbp2nla       | -0.399030632 | -0.078691774 | -0.193018514 | -0.275655386 |
| ENSDART00000075184 | snx1a            | 0.267188596  | 0.126701463  | 0.120486891  | -0.033463537 |
| ENSDART00000075187 | pdzd11           | 1.031277997  | 1.70516213   | 1.574957324  | 1.135180778  |
| ENSDART00000075223 | cox7a2a          | -0.206130471 | -0.297851957 | -0.422850723 | -0.097231315 |
| ENSDART00000075260 | inab             | -0.558694355 | 0.275313434  | 1.165237079  | 1.111612471  |
| ENSDART00000075262 | cad              | 0.41294438   | 0.156970425  | 0.074105835  | 0.04769287   |
| ENSDART00000075278 | atp1b4           | -0.758712842 | -0.43098592  | -0.240547748 | -0.077197984 |
| ENSDART00000075286 | slc2a15b         | 1.023992215  | 0.671159354  | 0.170031714  | -0.73573625  |
| ENSDART00000075299 | zgc:153911       | 1.082638325  | 2.093301655  | 1.816780233  | 1.137984438  |
| ENSDART00000075320 | nampta           | -0.083138724 | -0.057980927 | 0.268248216  | -0.062095237 |
| ENSDART00000075331 | insm1b           | 0.180818368  | 0.558805202  | 0.852549514  | 0.856981121  |
| ENSDART00000075340 | eef1a1b          | -0.66677551  | -0.473919347 | -0.344351157 | 0.106841151  |
| ENSDART00000075351 | zgc:112285       | 0.930923442  | 1.110746674  | 0.609701543  | 0.79082813   |
| ENSDART00000075398 | cilp             | 1.006018993  | 0.43809517   | 0.394851989  | 0.084259634  |
| ENSDART00000075400 | EIF3JB           | 0.284407943  | 0.11040548   | -0.086691777 | -0.1231685   |
| ENSDART00000075421 | sord             | -0.008165085 | -0.251228216 | -0.437538687 | -0.226988953 |
| ENSDART00000075465 | mylpfa           | -0.627780558 | 3.258441537  | 4.096966032  | 2.542734101  |
| ENSDART00000075491 | pop5             | 0.444559136  | 0.7451635    | 0.571282976  | 0.537107281  |
| ENSDART00000075495 | rpl23            | 0.390673252  | 0.341184618  | 0.264108815  | -0.005521244 |
| ENSDART00000075499 | si:dkey-283b1.7  | -0.753135255 | -0.256638623 | -0.866666345 | -0.691414461 |
| ENSDART00000075510 | ngb              | -0.534714702 | -0.310443771 | -0.511019459 | -0.235764625 |
| ENSDART00000075513 | aqp9b            | -0.181865878 | -0.358464178 | -0.54013493  | -0.322928595 |
| ENSDART00000075519 | aldh1a2          | -0.136704985 | -0.161016939 | -0.528203419 | -0.420522124 |
| ENSDART00000075551 | adhfe1           | 0.155892684  | -0.065430004 | -0.440766413 | -0.267456669 |
| ENSDART00000075663 | cracr2b          | 0.080855847  | 0.057965052  | -0.927246946 | -0.842015409 |
| ENSDART00000075743 | eprs             | 0.181617497  | 0.208060281  | 0.357036503  | 0.248273691  |
| ENSDART00000075749 | ppp2r2ca         | -0.492014929 | -0.268923214 | 0.328067214  | 0.425314748  |
| ENSDART00000075808 | apbb3            | -0.025817957 | 0.161567226  | 0.465828121  | 0.45985711   |
| ENSDART00000075889 | trub1            | 0.429771719  | 0.538562347  | 0.550227428  | 0.249034481  |
| ENSDART00000075902 | klhl43           | 1.602362948  | 3.319039146  | 3.627754288  | 3.174379945  |
| ENSDART00000075903 | crif3            | -0.351458679 | -0.119437595 | 0.002747455  | -0.299343819 |
| ENSDART00000075918 | pcmt2            | -0.427264647 | -0.257111837 | -0.149394946 | 0.062644737  |
| ENSDART00000075927 | rad50            | 0.535614901  | 0.654138999  | 0.420227838  | 0.362493118  |
| ENSDART00000075935 | vtnb             | -0.377853158 | -0.359520721 | -0.399371834 | -0.233041975 |
| ENSDART00000075940 | mtnr1ba          | -0.423445838 | -1.139676296 | -0.754844062 | -0.657118397 |
| ENSDART00000075974 | ism2b            | -0.752954546 | -0.582959852 | -0.548810475 | -0.377147389 |
| ENSDART00000075993 | crtc1b           | -0.280354395 | -0.577500657 | -0.194615785 | -0.207111517 |

|                    |                    |              |              |              |              |
|--------------------|--------------------|--------------|--------------|--------------|--------------|
| ENSDART00000076004 | tmem62             | -0.08960985  | 0.130455024  | 0.308433272  | 0.432472028  |
| ENSDART00000076009 | hadhab             | 0.274869752  | 0.225585159  | 0.168828199  | 0.114580965  |
| ENSDART00000076030 | fbf                | 0.33280558   | 0.192834191  | 0.116054515  | 0.005015438  |
| ENSDART00000076066 | lin37              | -0.271630989 | -0.17922011  | -0.496068109 | -0.578879729 |
| ENSDART00000076082 | fetub              | 1.519329398  | 0.709563768  | 0.228067904  | 0.727615025  |
| ENSDART00000076083 | cdc42ep2           | -0.005463107 | 0.666894523  | 0.327900404  | 0.083241845  |
| ENSDART00000076157 | rab24              | 0.15781613   | 0.389364959  | 0.281581252  | 0.130911228  |
| ENSDART00000076160 | mustn1a            | 1.455614739  | 1.360374319  | 1.112954668  | 0.977466313  |
| ENSDART00000076161 | hoxb5b             | 2.652791903  | 3.351280664  | 2.618897772  | 0.864721852  |
| ENSDART00000076215 | CR735102.1         | -0.360410997 | -0.514821634 | -0.137026978 | -0.257442941 |
| ENSDART00000076238 | rbm41              | -0.118558432 | -0.076666908 | -0.261877568 | -0.209896281 |
| ENSDART00000076333 | pgk1               | -0.277163813 | -0.302384935 | -0.297237462 | -0.087607565 |
| ENSDART00000076399 | nat10              | 0.304377518  | 0.292344426  | 0.160797024  | -0.000572845 |
| ENSDART00000076417 | cdkn1bb            | 0.050164178  | 0.266815944  | 0.205910633  | -0.014851012 |
| ENSDART00000076423 | sobpa              | -0.461445043 | -0.18351314  | 0.23019679   | 0.473568961  |
| ENSDART00000076483 | zgc:77151          | 0.249827469  | 0.539125177  | 0.736975565  | 0.447972658  |
| ENSDART00000076496 | stk33              | -1.544458095 | -0.103215934 | -2.939032674 | -0.830432799 |
| ENSDART00000076502 | renglb             | 0.481268892  | 0.304392452  | -0.423368722 | -1.032950672 |
| ENSDART00000076506 | wisp1a             | 0.075916017  | 0.908100257  | 1.435223818  | 0.542654062  |
| ENSDART00000076518 | sla1               | 0.79177335   | 0.326196979  | 0.029071124  | -0.326507352 |
| ENSDART00000076554 | si:zfos-464b6.2    | 0.5351721    | 0.505133501  | 0.952773319  | 0.026200547  |
| ENSDART00000076571 | rtn1a              | 0.31833938   | 1.022959786  | 0.981624341  | 0.706878795  |
| ENSDART00000076574 | rtn1a              | -0.132166015 | 0.374408359  | 0.606191338  | 0.476970779  |
| ENSDART00000076600 | rpe65c             | 1.983711129  | 2.589375601  | 1.902404689  | 1.435704768  |
| ENSDART00000076636 | fzd2               | 0.563199333  | 0.424474998  | 0.171148118  | -0.301884624 |
| ENSDART00000076648 | clip3              | -0.386141796 | -0.253171682 | 0.072987847  | 0.103065331  |
| ENSDART00000076786 | clec19a            | 0.036182435  | 0.047143104  | -0.366633197 | -0.838257146 |
| ENSDART00000076815 |                    | 2.456176486  | 3.15180058   | 2.959048559  | 2.414794476  |
| ENSDART00000076925 | ITPRIPL2           | 0.939030216  | 0.593569322  | 0.667833004  | -0.090802943 |
| ENSDART00000076929 | prkg2              | -0.322610383 | -0.221985796 | -0.523406711 | -0.304941411 |
| ENSDART00000076938 | pogza              | 0.098614093  | 0.259761887  | 0.429750084  | 0.224276825  |
| ENSDART00000076946 | PDE4DIP            | -0.575491599 | -0.478988093 | -0.210265098 | -0.157443712 |
| ENSDART00000076997 | lmo4b              | -0.24164689  | -0.249534589 | -0.123100185 | -0.051398466 |
| ENSDART00000077008 | alox5ap            | 0.122223757  | -0.082901221 | -0.550940123 | -0.70030614  |
| ENSDART00000077047 | btr09              | 0.55744156   | 0.619797073  | 1.272153942  | -0.048548492 |
| ENSDART00000077080 | PTP4A3 (1 of many) | 0.077833133  | 0.004217905  | -0.463336754 | -0.666773375 |
| ENSDART00000077087 | id3                | 0.047452456  | 0.423524517  | 0.285867988  | -0.296627095 |
| ENSDART00000077157 | six3b              | -0.273810969 | -0.17356253  | 0.033591817  | 0.098241195  |
| ENSDART00000077185 | dgat1b             | 0.79138422   | 0.60487817   | 0.419420549  | -0.346047138 |
| ENSDART00000077197 | tmsb               | 1.972985822  | 3.598018383  | 3.544381625  | 2.894174576  |
| ENSDART00000077215 | ppp2r5b            | 0.185911454  | 0.229029828  | 0.615811771  | 0.611674376  |
| ENSDART00000077216 | astn1              | -0.280184115 | -0.378831195 | -0.109389357 | 0.054556021  |
| ENSDART00000077222 | ldlrad4b           | -0.327819788 | -0.475734059 | -0.025614815 | 0.028486052  |
| ENSDART00000077259 | ebna1bp2           | 0.420936188  | 0.344892308  | 0.188849483  | 0.008127131  |
| ENSDART00000077386 | prss16             | 0.714972584  | 0.32483027   | 0.071612523  | -0.240875958 |
| ENSDART00000077406 | cdh27              | -0.746226456 | -0.635554214 | -0.974185768 | -0.424771371 |
| ENSDART00000077411 | cxcl12b            | -0.236947042 | -0.2488008   | -0.593903488 | -0.559818867 |
| ENSDART00000077418 | ctsba              | 1.550723066  | 1.033464808  | 0.97579905   | 0.475659932  |
| ENSDART00000077420 | dtncbp1a           | 0.285624415  | 0.193705819  | 0.051855359  | -0.043275565 |
| ENSDART00000077445 | pim3               | -0.017745548 | 0.425023548  | -0.018053873 | 0.016773558  |
| ENSDART00000077459 | smyd2a             | 0.109333535  | 0.326579335  | 0.423001533  | 0.365696401  |

|                    |                    |              |              |              |              |
|--------------------|--------------------|--------------|--------------|--------------|--------------|
| ENSDART00000077462 | slc6a9             | -0.157728483 | -0.388200876 | -0.444419631 | -0.487528264 |
| ENSDART00000077476 | prox1a             | -0.192871011 | -0.360465718 | -0.389825586 | -0.065307919 |
| ENSDART00000077484 | zhx2a              | 0.117201305  | 0.356185793  | 0.299966576  | 0.024327323  |
| ENSDART00000077511 | ccr9a              | 1.513300322  | 1.48326526   | 0.981085195  | 0.082724583  |
| ENSDART00000077538 | kpna2              | 3.376600286  | 3.247024938  | 2.263140647  | 0.702563762  |
| ENSDART00000077539 | tuba1c             | -0.211130957 | 0.180769664  | 0.840172721  | 0.834422327  |
| ENSDART00000077545 | slc7a7             | 1.304066715  | 0.45830859   | 0.136139102  | 0.056436424  |
| ENSDART00000077582 | pitpnm3            | -0.256916567 | -0.419244886 | -0.147473339 | -0.136698838 |
| ENSDART00000077619 | b3gat1b            | -0.266663197 | -0.223974588 | -0.393683459 | -0.125347427 |
| ENSDART00000077635 | si:ch211-103n10.5  | 0.712451842  | 0.944946244  | 1.075959446  | -0.046690849 |
| ENSDART00000077662 | myl6               | 0.570434868  | 0.203215664  | -0.213132641 | -0.482895856 |
| ENSDART00000077664 | atp2b1a            | -0.283300071 | -0.323367416 | -0.218529441 | -0.07251725  |
| ENSDART00000077707 | llph               | 0.612018484  | 0.617804437  | 0.382050706  | 0.042759152  |
| ENSDART00000077715 | si:dkey-25e12.3    | 1.07190149   | 0.953044464  | 0.701373655  | 0.117439727  |
| ENSDART00000077724 | gnb5b              | -0.216593155 | -0.279473354 | -0.485943487 | -0.092161444 |
| ENSDART00000077783 | hmox2a             | 0.068185569  | 0.120478633  | -0.326668325 | -0.242069945 |
| ENSDART00000077805 | gria2a             | -0.63140941  | -0.839709321 | -0.362303249 | -0.053629448 |
| ENSDART00000077809 | cyp26c1            | -0.796873586 | -0.763455549 | -0.70044496  | -0.582141171 |
| ENSDART00000077823 | lrit3a             | -0.481897882 | -0.48516269  | -0.481656788 | -0.455604814 |
| ENSDART00000077834 | rps27.2            | 0.365621497  | 0.39961171   | 0.113670294  | -0.081169937 |
| ENSDART00000077836 | mmp20b             | -0.526034453 | -0.625086024 | -0.345110188 | -0.027134291 |
| ENSDART00000077839 | atf7b              | -0.232485852 | -0.196508033 | -0.391624214 | -0.206346003 |
| ENSDART00000077868 | si:ch211-212k18.7  | 1.166604646  | 0.658609076  | 0.758814708  | -0.422210365 |
| ENSDART00000077895 | rnf7               | -0.220302586 | -0.252047578 | -0.316298741 | -0.185486087 |
| ENSDART00000077898 | grk7b              | -0.582244813 | -0.358943116 | -0.402813205 | 0.000611673  |
| ENSDART00000077951 | pcolce2b           | -0.119540012 | -0.232226227 | -0.447813206 | -1.286575617 |
| ENSDART00000077998 | cgna               | 0.243171731  | 0.392675733  | 0.184983165  | 0.011488923  |
| ENSDART00000078014 | poldip2            | 0.012504595  | -0.191194187 | -0.45353852  | -0.221096745 |
| ENSDART00000078018 | ruvbl2             | 0.355681647  | 0.304270351  | 0.334910735  | 0.092604809  |
| ENSDART00000078024 | crk                | -0.263270816 | -0.200000869 | -0.157496558 | -0.11349953  |
| ENSDART00000078033 | GPT (1 of many)    | -0.491126295 | -0.482727977 | -0.247455346 | -0.055451846 |
| ENSDART00000078037 | aclyb              | -0.084913872 | -0.379038696 | -0.658479637 | -0.284307838 |
| ENSDART00000078053 | tcbcb              | 0.21865146   | 0.428683048  | 0.432538452  | 0.172774297  |
| ENSDART00000078072 | akap12b            | 2.975823835  | 3.328543122  | 3.653370868  | 2.600734247  |
| ENSDART00000078079 | pcnxl2             | -0.518593139 | -0.325199094 | 0.020646332  | 0.403616211  |
| ENSDART00000078115 | sdhda              | -0.602799581 | -0.148637611 | 0.027660422  | 0.175615096  |
| ENSDART00000078137 | ankrd54            | 0.051281727  | 0.23783078   | 0.382868701  | 0.32135773   |
| ENSDART00000078148 | smc1a              | -3.399991944 | -0.069804776 | -1.248223526 | -0.569589215 |
| ENSDART00000078156 | srm                | 0.127220715  | 0.22303682   | 0.345313656  | 0.085476496  |
| ENSDART00000078181 | SLC3A2 (1 of many) | -0.23816401  | -0.122270906 | -0.56307324  | -1.283472558 |
| ENSDART00000078187 | foxo4              | -0.056772502 | -0.136599728 | -0.36455832  | -0.08188156  |
| ENSDART00000078192 | cnpy4              | 0.065580495  | 0.06657667   | -0.1806698   | -0.737660818 |
| ENSDART00000078202 | phka2              | -0.128194416 | -0.258622872 | -0.071035307 | 0.033146819  |
| ENSDART00000078226 | mtnr1bb            | -0.285812097 | -0.289316068 | -0.599481549 | -0.276891324 |
| ENSDART00000078232 | cdh10a             | -0.495858439 | -0.491434243 | -0.331011431 | 0.033804718  |
| ENSDART00000078249 | kcnc3a             | -0.908848026 | -1.288714191 | -0.644595688 | 0.010477706  |
| ENSDART00000078256 | dopey2             | -0.056439943 | -0.30342326  | -0.284521914 | -0.1564256   |
| ENSDART00000078266 | rsl1d1             | 0.351365949  | 0.392552672  | 0.175928217  | -0.070353732 |
| ENSDART00000078277 | msmo1              | 0.087631699  | 1.109674669  | 1.47165822   | 0.852850391  |
| ENSDART00000078283 | tex10              | 0.186689066  | 0.248875437  | 0.343572259  | 0.154977674  |
| ENSDART00000078304 | lzic               | 0.119250866  | 0.44378754   | 0.377529349  | 0.128075007  |

|                    |                      |              |              |              |              |
|--------------------|----------------------|--------------|--------------|--------------|--------------|
| ENSDART00000078305 | zswim5               | -0.126655043 | 0.076098312  | 0.245252624  | 0.223511201  |
| ENSDART00000078306 | arhgef2              | 0.429610468  | 0.807274797  | 0.854804837  | 0.533632211  |
| ENSDART00000078311 | zgc:154093           | -0.170397489 | -0.310689773 | -0.421136702 | -0.191616401 |
| ENSDART00000078316 | nipa2                | 0.247262018  | 0.436255727  | 0.4433152    | 0.003440759  |
| ENSDART00000078325 | slc16a8              | 2.36549078   | 0.51323664   | -0.815797835 | -1.896302174 |
| ENSDART00000078334 | celsr3               | 0.469496099  | 0.512562938  | 0.74195357   | 0.599858827  |
| ENSDART00000078336 | klc3                 | -0.15725421  | -0.267140148 | -0.672772286 | -0.331888789 |
| ENSDART00000078352 | tspan14              | 0.358298965  | 0.408510067  | 0.238594355  | -0.012844708 |
| ENSDART00000078412 | rps8a                | 0.416303691  | 0.456350868  | 0.419741526  | 0.122907452  |
| ENSDART00000078438 |                      | 0.22834743   | 0.583517385  | 0.218267131  | 0.08549295   |
| ENSDART00000078449 | itih6                | -0.23325998  | -0.04381884  | -0.494745518 | -1.555031348 |
| ENSDART00000078491 | mov10b.2             | 0.18890489   | 0.151487185  | 1.352539948  | -0.244846261 |
| ENSDART00000078494 | l3mbtl2              | 1.071567754  | 1.041266281  | 0.642956308  | 0.316295602  |
| ENSDART00000078522 | eef1g                | 0.462831941  | 0.651007925  | 0.567355432  | 0.209607784  |
| ENSDART00000078529 | kin                  | -1.437736057 | -0.295663012 | -0.493580296 | -4.734617185 |
| ENSDART00000078533 | kcnd3                | -0.299800885 | -0.32147822  | -0.292734142 | -0.136341479 |
| ENSDART00000078535 | gtf2h5               | 0.788173845  | 1.2490535    | 0.921738211  | 0.911998292  |
| ENSDART00000078543 | syt11b               | 0.975892204  | 1.6420197    | 1.925407845  | 1.338618886  |
| ENSDART00000078561 | SPTBN4               | -0.239897718 | -0.33102434  | 0.293671093  | 0.445086753  |
| ENSDART00000078594 | tyrp1b               | 0.662132615  | 0.257868212  | -0.309681889 | -0.980797447 |
| ENSDART00000078596 | hspd1                | 0.512169965  | 0.358816938  | 0.201006014  | 0.20720259   |
| ENSDART00000078611 | jac2                 | 3.404844888  | 3.429750736  | 2.921387124  | 1.113891823  |
| ENSDART00000078630 | nme7                 | 0.176767548  | 0.421131107  | 0.35919241   | 0.2453347    |
| ENSDART00000078634 | eif5a2               | 0.493280465  | 0.485481598  | 0.418411017  | 0.051860815  |
| ENSDART00000078642 | vps37b               | 0.195137227  | 0.217160121  | 0.327187369  | 0.074828156  |
| ENSDART00000078647 | si:ch211-201h21.5    | 1.148616031  | 0.689283012  | 0.40532037   | 0.049879214  |
| ENSDART00000078652 | camk2g2              | -0.278366483 | -0.285453125 | -0.22783561  | -0.037372706 |
| ENSDART00000078694 | TMEM179B (1 of many) | 0.551851512  | 0.299347782  | 0.026749154  | -0.302916803 |
| ENSDART00000078708 | zgc:162952           | -0.249018938 | -0.407117986 | -0.404487357 | -0.328471526 |
| ENSDART00000078723 | dixdc1a              | 0.324551864  | 0.395166532  | 0.459267183  | 0.274985584  |
| ENSDART00000078771 | SBK1                 | -0.390774004 | 0.13684565   | 0.923517231  | 0.784697628  |
| ENSDART00000078792 | ahcyl1               | 0.058902937  | 0.000957907  | -0.341276653 | -0.275160426 |
| ENSDART00000078795 | ahcyl1               | -0.360916144 | -0.460734164 | -0.414619806 | -0.201451999 |
| ENSDART00000078838 | rab3aa               | -0.225658115 | -0.303506805 | -0.374028659 | -0.138563861 |
| ENSDART00000078843 | SLC22A7 (1 of many)  | -0.18908726  | -0.089234859 | -0.388754878 | -1.485871042 |
| ENSDART00000078856 | dlg3                 | -0.31041276  | -0.361138693 | -0.191257864 | 0.041004354  |
| ENSDART00000078858 | si:ch73-86n18.1      | 0.106229924  | -0.155735751 | -0.58770094  | -0.854457693 |
| ENSDART00000078866 | ifi30                | 1.574791131  | 0.896478525  | 0.373397245  | -0.020268978 |
| ENSDART00000078877 | sncga                | -0.059233705 | 0.307631997  | 0.27775793   | 0.434885626  |
| ENSDART00000078908 | usp1                 | -0.163356677 | -0.229514103 | -0.329514373 | -0.251997637 |
| ENSDART00000078916 | smim7                | -0.217464923 | -0.109941617 | -0.350272436 | -0.25934653  |
| ENSDART00000078949 | afap11b              | 1.061182692  | 1.814819842  | 1.643265844  | 0.877712611  |
| ENSDART00000078953 | afap11b              | 0.880715307  | 1.833091326  | 1.686561879  | 0.852421188  |
| ENSDART00000078982 | vat1                 | 0.139786944  | 0.289776545  | 0.306149934  | -0.025026234 |
| ENSDART00000079019 | spsb1                | 0.176345745  | 0.177736786  | 0.29021019   | 0.163667209  |
| ENSDART00000079035 | rap1gap              | -0.57187807  | -0.701331328 | -0.299987324 | -0.289210087 |
| ENSDART00000079046 | cpamd8               | -0.122112474 | -0.085213564 | -0.191819718 | -0.872911162 |
| ENSDART00000079050 | nutf2                | 0.337010875  | 0.380281227  | 0.325036311  | 0.156803484  |
| ENSDART00000079092 | si:dkey-261i16.5     | -0.526813533 | -0.563690076 | -0.369398724 | 0.061616577  |
| ENSDART00000079104 | ndufs6               | -0.146008815 | -0.377028896 | -0.443194118 | -0.327081615 |
| ENSDART00000079112 | calca                | -0.439449486 | -0.32190484  | -0.601830596 | -0.728154291 |

|                    |                    |              |              |              |              |
|--------------------|--------------------|--------------|--------------|--------------|--------------|
| ENSDART00000079138 | ptenb              | -0.337433521 | -0.277401842 | -0.145004066 | -0.034401548 |
| ENSDART00000079144 | ptenb              | -0.303152595 | -0.238217531 | -0.001915727 | -0.031063744 |
| ENSDART00000079173 | lepr               | 1.173965688  | 1.129708824  | 0.920018098  | 0.6672678    |
| ENSDART00000079202 | abcb8              | -0.111089791 | -0.249333097 | -0.256171214 | -0.098593711 |
| ENSDART00000079222 | chaf1b             | 1.242408116  | 0.820706616  | 0.642546621  | 0.111426229  |
| ENSDART00000079235 | cd99l2             | -0.167082345 | 0.448795434  | 0.91020128   | 0.864265064  |
| ENSDART00000079283 | tmeff1b            | 0.060962109  | 0.679659218  | 0.971148806  | 0.712213835  |
| ENSDART00000079310 | manba              | 0.495609624  | 0.109254813  | 0.005925635  | -0.12409296  |
| ENSDART00000079341 | plch1              | -0.457888719 | -0.43639001  | -0.345543016 | -0.155469708 |
| ENSDART00000079364 | snapc2             | -0.030032776 | -0.185097862 | -0.560264081 | -0.400163167 |
| ENSDART00000079397 | ryk                | -0.107777448 | 0.087264815  | -0.11559458  | -0.531439469 |
| ENSDART00000079431 | rtn2b              | 0.025228511  | -0.123165337 | -0.319794883 | -0.05842346  |
| ENSDART00000079443 | GABRA2 (1 of many) | -0.623319426 | -0.542833879 | -0.157704672 | 0.138036393  |
| ENSDART00000079454 | vamp2              | -0.197978353 | -0.366012835 | -0.326357547 | -0.1060827   |
| ENSDART00000079497 | emg1               | 0.201493898  | 0.380905959  | 0.206415684  | 0.036355374  |
| ENSDART00000079518 | dnajc1             | 0.043021447  | -0.028027956 | -0.123370167 | -0.287218054 |
| ENSDART00000079528 | ilk                | 0.338564211  | 0.350049719  | 0.346485507  | 0.032055843  |
| ENSDART00000079536 | nek7               | 0.300813238  | 0.263862785  | 0.126120434  | -0.061245789 |
| ENSDART00000079549 | tpte               | 0.809167451  | 0.638911968  | 0.260848622  | -0.250321254 |
| ENSDART00000079559 | ifit16             | 0.716638095  | 0.325468397  | 2.311988055  | -0.283531995 |
| ENSDART00000079563 | fas                | 0.786193523  | 0.954741877  | 1.62170637   | 0.201092535  |
| ENSDART00000079591 | dpm1               | -0.022510061 | -0.080956932 | -0.275574355 | -0.162526678 |
| ENSDART00000079597 | vps36              | -0.205754956 | -0.373190829 | -0.317459289 | -0.134792851 |
| ENSDART00000079629 | ppm1nb             | -0.279926594 | -0.345062767 | -0.462173038 | -0.171806172 |
| ENSDART00000079656 | tvp23b             | -0.013268416 | -0.155098046 | -0.309054243 | -0.268412353 |
| ENSDART00000079686 | zmp:0000001103     | 0.143973249  | -0.889323937 | -0.759747318 | -0.487193938 |
| ENSDART00000079695 | zwilch             | 1.159509442  | 0.995361025  | 0.861360163  | 0.105564769  |
| ENSDART00000079711 | slc25a1a           | 0.025053389  | 0.916416559  | 1.283110285  | 0.925187833  |
| ENSDART00000079716 | hpf1               | -0.113759988 | -0.292000236 | -0.336217157 | -0.156517495 |
| ENSDART00000079778 | ifit8              | 1.432186723  | 0.097505141  | 4.166007884  | 0.96250098   |
| ENSDART00000079803 | nmt1b              | 0.899927422  | 1.156945789  | 1.408075075  | 0.459974747  |
| ENSDART00000079810 | si:dkey-222b8.4    | -0.076664011 | -0.231174428 | -0.530241167 | -0.088965105 |
| ENSDART00000079840 | rorca              | -0.65562057  | -0.064052995 | 0.161319682  | 0.103804992  |
| ENSDART00000079843 | nkeh1b.2           | 0.690825571  | 0.217907848  | -0.110601617 | -0.426325911 |
| ENSDART00000079866 | slc30a9            | -0.061810697 | -0.211371943 | -0.307919743 | -0.172076689 |
| ENSDART00000079879 | si:dkey-91i10.3    | -0.580141681 | -0.553279281 | -0.678150475 | -0.52463511  |
| ENSDART00000079884 | alox5a             | 0.143901368  | -0.192427785 | -0.334678776 | -0.585419844 |
| ENSDART00000079984 | rpl22l1            | 0.678692893  | 0.584241724  | 0.331994973  | -0.011632328 |
| ENSDART00000080014 | rps8b              | -0.261943359 | -0.309301007 | -0.481979191 | -0.409711249 |
| ENSDART00000080016 | ppp3ccb            | -0.214631103 | -0.298468254 | 0.05278016   | 0.038022829  |
| ENSDART00000080033 | SSBP2 (1 of many)  | 0.123939988  | 0.461173497  | 0.600467157  | 0.3572706    |
| ENSDART00000080042 | rab33a             | -0.045588719 | 0.341497657  | 0.630733663  | 0.503197845  |
| ENSDART00000080064 | CR847953.1         | 0.050009503  | -0.040451977 | 0.259802571  | 0.438904414  |
| ENSDART00000080079 | slc44a5b           | 0.101790496  | -0.11939972  | -0.347901034 | 0.093736244  |
| ENSDART00000080100 | slc24a2            | -0.273129774 | -0.420453101 | -0.415034704 | -0.05535122  |
| ENSDART00000080129 | ston2              | -0.17811412  | -0.063813163 | -0.270400144 | -0.092351554 |
| ENSDART00000080135 | gfpt1              | 0.380664344  | 0.49511154   | 0.544262456  | 0.337010461  |
| ENSDART00000080256 | nefma              | 0.572074143  | 2.009260502  | 2.281701505  | 1.529767044  |
| ENSDART00000080289 | prrc2c             | 0.060093623  | 0.047472332  | 0.306363857  | 0.189281148  |
| ENSDART00000080313 | arl4ca             | -0.176267156 | -0.177242747 | -0.285935967 | -0.135129968 |
| ENSDART00000080328 | nf1a               | -0.041622168 | -0.338478743 | -0.243156878 | -0.085905935 |



|                    |                      |              |              |              |              |
|--------------------|----------------------|--------------|--------------|--------------|--------------|
| ENSDART00000080339 | galm                 | 0.868912331  | 0.484945087  | -0.111697277 | -0.429352779 |
| ENSDART00000080342 | josd2                | 0.375878923  | 0.743043487  | 0.777511515  | 0.447917768  |
| ENSDART00000080351 | dhx57                | 0.296631931  | 0.310315824  | 0.343123119  | 0.20162921   |
| ENSDART00000080377 | aldoca               | 2.758856293  | 1.548001605  | 2.09362575   | 1.794239524  |
| ENSDART00000080385 | SLC9A3R2 (1 of many) | -0.157518802 | -0.380020166 | -0.549234439 | -0.123708468 |
| ENSDART00000080389 | fam13a               | 0.342651645  | -0.065971229 | -0.119440295 | 0.116639155  |
| ENSDART00000080414 | sbk3                 | -0.999751639 | -0.617799332 | -0.160630934 | -0.723965523 |
| ENSDART00000080423 | ctsd                 | 0.448869492  | 0.173368574  | -0.412435712 | -0.637183839 |
| ENSDART00000080430 | gfra2b               | -0.62088032  | -0.576945607 | -0.392707521 | -0.144958503 |
| ENSDART00000080465 | hells                | 0.812911201  | 0.936234984  | 0.557478835  | 0.182957003  |
| ENSDART00000080486 | ywhag1               | -1.02392497  | -0.686234935 | -0.010129168 | 0.2177797    |
| ENSDART00000080523 | itgae.2              | 1.067269567  | 0.812178684  | 0.361968863  | 0.003662922  |
| ENSDART00000080549 | lyz                  | 1.762095695  | 1.25446765   | 1.569214818  | 0.577231805  |
| ENSDART00000080602 | map7d2b              | 0.243598476  | 0.831190471  | 1.239754477  | 0.898189276  |
| ENSDART00000080628 | arpc3                | 0.270913011  | 0.099552933  | 0.079917753  | -0.036372289 |
| ENSDART00000080664 | zgc:86709            | 1.428698865  | 3.355720442  | 2.498933956  | 1.732893579  |
| ENSDART00000080673 | syt11a               | -0.340996032 | -0.110491382 | 0.046613391  | 0.116186716  |
| ENSDART00000080679 | ccdc136b             | -1.000484865 | -0.898166187 | -0.625061619 | -0.323992777 |
| ENSDART00000080712 | slc43a3b             | 2.109023631  | 1.075213126  | 0.724428131  | -0.154263604 |
| ENSDART00000080771 | slc6a16a             | -0.167322319 | -0.266319768 | -0.350765511 | -0.319541774 |
| ENSDART00000080789 | trpc4a               | -0.390087102 | -0.398102567 | -0.462339329 | -0.409517574 |
| ENSDART00000080808 | six3a                | -0.437705937 | -0.430575558 | -0.140593988 | -0.07114268  |
| ENSDART00000080829 | hspa14               | 0.672662829  | 0.694717457  | 0.8195912    | 0.418167344  |
| ENSDART00000080854 | stat3                | 0.856010749  | 0.444560766  | 0.379796349  | -0.326021696 |
| ENSDART00000080864 | magt1                | 0.441285986  | 0.302582629  | 0.047526992  | -0.172355248 |
| ENSDART00000080875 | b3gnt3               | 0.44585097   | 0.568958183  | 0.901392395  | 0.139618312  |
| ENSDART00000080900 | cfap57               | 2.52486974   | 2.757508228  | 2.941219811  | 1.994632033  |
| ENSDART00000080904 | sardh                | 0.759429129  | 0.915608159  | 0.345777903  | -0.12435587  |
| ENSDART00000080919 | rpl36a               | 0.405736348  | 0.485454355  | 0.225930563  | -0.002722727 |
| ENSDART00000080927 | snap25b              | -0.418114286 | -0.385475041 | -0.102955296 | 0.076752829  |
| ENSDART00000081039 |                      | 2.046984335  | 2.965673996  | 2.312859948  | -1.109370855 |
| ENSDART00000081059 | rps6kb1b             | 0.156747941  | 0.167680861  | 0.344534054  | 0.174989656  |
| ENSDART00000081092 | si:dkeyp-77h1.4      | -0.383994825 | 0.24121529   | 0.967657356  | 0.94823494   |
| ENSDART00000081129 | cdk15                | -0.731126626 | -0.682923022 | -0.544281357 | -0.253398129 |
| ENSDART00000081140 | CT990561.1           | -0.348057632 | -0.380510005 | -0.109063338 | 0.180807023  |
| ENSDART00000081154 | prpf18               | -0.15179636  | -0.149318949 | -0.443970585 | -0.330213785 |
| ENSDART00000081170 | cux1a                | -0.092953946 | -0.2283391   | 0.138990685  | 0.296890549  |
| ENSDART00000081183 | enc3                 | 0.409273368  | 0.447706974  | 0.259987961  | 0.244016846  |
| ENSDART00000081204 | acot9.1              | 0.172924803  | 0.462969941  | 0.48161826   | 0.340925129  |
| ENSDART00000081214 | selt1a               | -0.31898529  | -0.284714031 | -0.513594635 | -0.412445291 |
| ENSDART00000081223 | krt5                 | 2.400508858  | 4.729984226  | 4.862312842  | 5.813921541  |
| ENSDART00000081228 | abhd14a              | -0.111769944 | -0.123001167 | -0.255304369 | -0.088239573 |
| ENSDART00000081272 | gcn1                 | 0.168820856  | 0.100284898  | 0.363305756  | 0.2232516    |
| ENSDART00000081290 | rnaset2l             | 0.733135995  | 0.630785596  | 0.575081946  | 0.019045787  |
| ENSDART00000081323 | abhd17c              | -0.03998334  | 0.119899277  | 0.261541408  | 0.19734068   |
| ENSDART00000081325 | dynll1               | -0.057380796 | -0.1118203   | -0.516198015 | -0.112248637 |
| ENSDART00000081326 | prpf40a              | 0.136343368  | 0.189733856  | 0.260275336  | 0.074340716  |
| ENSDART00000081338 | slc9a5               | 0.890559011  | 1.045395859  | 1.329125407  | 1.036960607  |
| ENSDART00000081343 | plk1                 | 1.547304713  | 1.292689538  | 1.02080622   | 0.322979307  |
| ENSDART00000081359 | zgc:110425           | 0.523386438  | 0.743109297  | 0.819385742  | 0.340090119  |
| ENSDART00000081411 | pole                 | 0.480999213  | 0.458730193  | 0.174065324  | -0.07089485  |

|                    |                    |              |              |              |              |
|--------------------|--------------------|--------------|--------------|--------------|--------------|
| ENSDART00000081432 | sprb               | -0.390584563 | -0.260880914 | -0.194039821 | -0.19414991  |
| ENSDART00000081447 | fbxo30a            | 0.072897711  | 0.325740781  | 0.333966964  | 0.186898423  |
| ENSDART00000081468 | ccdc79             | 0.331555315  | 0.505423262  | 0.318137438  | -0.103372006 |
| ENSDART00000081510 | celf4              | -0.384169548 | -0.376019008 | -0.02531238  | 0.147771891  |
| ENSDART00000081546 | trim46b            | 0.101540064  | 0.068781295  | 0.327282891  | 0.456457337  |
| ENSDART00000081568 | tcf19l             | 0.712871286  | 0.397385898  | 0.351815803  | 0.227291981  |
| ENSDART00000081601 | cept1a             | 0.150762086  | 0.296977372  | 0.445683893  | 0.275050142  |
| ENSDART00000081611 | cgnb               | -0.200219306 | -0.438466186 | -1.067503957 | -0.17391972  |
| ENSDART00000081620 | vax2               | -0.290535146 | -0.478626837 | -0.10258237  | -0.009557703 |
| ENSDART00000081646 | glrx               | 0.838457918  | 1.280146822  | 1.066830025  | 0.395822945  |
| ENSDART00000081761 | bin1b              | -0.023096846 | -0.153451242 | -0.459181763 | -0.132136814 |
| ENSDART00000081781 | PLEKHG3            | -0.076813883 | -0.173391418 | -0.382548311 | -0.034437681 |
| ENSDART00000081794 | rasgrf2a           | -0.063040785 | -0.093088949 | -0.266637358 | 0.015786604  |
| ENSDART00000081797 | sash1b             | -0.368433045 | -0.365106826 | -0.357216383 | -0.178826864 |
| ENSDART00000081811 | zgc:112052         | 0.311036284  | 0.397766463  | 0.340201557  | 0.120599155  |
| ENSDART00000081832 | ptpcd1b            | 0.49240902   | 0.580136174  | 0.651643292  | 0.340422756  |
| ENSDART00000081870 | pcdh2ab6           | 0.090888519  | 0.246515279  | 0.356189629  | 0.303363778  |
| ENSDART00000081926 | CU856539.1         | -0.250902601 | -0.402416425 | -0.31567263  | -0.091643419 |
| ENSDART00000081946 | zgc:112332         | -0.051059621 | 0.027246103  | -0.289131429 | -0.652053172 |
| ENSDART00000081951 | stx1b              | -0.290947433 | -0.255213869 | 0.04983789   | 0.170348415  |
| ENSDART00000081966 | rtn4a              | 0.42137623   | 0.811004738  | 0.55995797   | 0.082545275  |
| ENSDART00000081978 | KCNJ6              | -0.364130454 | -0.389723131 | -0.355694518 | -0.126078935 |
| ENSDART00000081985 | pim2               | -0.011194591 | -0.040743933 | -0.388705404 | -0.753111264 |
| ENSDART00000081990 | strip2             | -0.530994895 | -0.582233551 | -0.263527962 | -0.22210065  |
| ENSDART00000082011 | lim2.2             | 1.304610538  | 0.978295786  | 0.86763989   | 0.856876261  |
| ENSDART00000082012 | gsk3aa             | -0.41333003  | -0.370003942 | -0.288947953 | -0.203102626 |
| ENSDART00000082050 | zgc:174904         | 1.977093547  | 1.430607855  | 1.439069833  | 0.228460651  |
| ENSDART00000082063 | fam114a1           | 0.586474654  | 0.396933414  | 0.041198489  | -0.237340023 |
| ENSDART00000082066 | atpv0e2            | -0.268294846 | -0.377237748 | -0.604078331 | -0.39998077  |
| ENSDART00000082080 | jupb               | -0.499893077 | -0.526312414 | -0.258393629 | -0.100168242 |
| ENSDART00000082082 | gars               | 0.395042441  | 0.664200633  | 0.717176297  | 0.392291214  |
| ENSDART00000082097 | PRSS35 (1 of many) | 0.904416504  | 0.725234092  | 1.067628772  | 0.791677307  |
| ENSDART00000082142 | EFEMP1 (1 of many) | -1.76159347  | -0.849874708 | -0.584181957 | -1.080912576 |
| ENSDART00000082151 | uqcrh              | -0.212671975 | -0.358890471 | -0.337939592 | -0.281374001 |
| ENSDART00000082223 | tax1bp3            | 0.85130321   | 1.256170012  | 1.075265217  | 0.22088107   |
| ENSDART00000082264 | pxdc1b             | 0.801924492  | 1.033443039  | 0.634881962  | 0.139425975  |
| ENSDART00000082301 | myrip              | -0.137038516 | -0.238384017 | 0.084718693  | 0.41131665   |
| ENSDART00000082346 | tfap2a             | -0.238141907 | -0.307957291 | -0.242159487 | -0.230339237 |
| ENSDART00000082368 | marco              | 0.980427549  | 0.782180823  | 1.00834904   | 0.091028138  |
| ENSDART00000082434 | tgif1              | 0.822910382  | 1.229522702  | 1.441745222  | 0.912580325  |
| ENSDART00000082438 | dlgap2a            | -0.366533513 | -0.540400426 | -0.257659814 | -0.037294062 |
| ENSDART00000082458 | sarnp              | 0.25573821   | 0.275816383  | 0.16902753   | 0.007612146  |
| ENSDART00000082471 | mfap2              | 0.61383585   | 0.779035446  | 0.354750417  | 0.055843134  |
| ENSDART00000082517 | rab43              | 0.357940531  | 0.212689136  | -0.148032038 | -0.068856369 |
| ENSDART00000082523 | impa2              | -0.208830066 | -0.398914852 | -0.498863304 | -0.267214166 |
| ENSDART00000082604 | galnt18b           | -0.214631898 | -0.351577935 | -0.246678211 | -0.218706176 |
| ENSDART00000082620 | dysf               | 1.140285476  | 2.000991026  | 2.040057287  | 1.067021482  |
| ENSDART00000082622 | fsd1l              | -0.046506283 | -0.340407639 | -0.41095417  | -0.201162325 |
| ENSDART00000082698 | kank4              | -0.273638259 | -0.263464734 | -0.200789629 | -0.103573896 |
| ENSDART00000082715 | camsap3            | 0.302702799  | 0.347512275  | 0.333666179  | -0.022433363 |
| ENSDART00000082745 | EMB                | -0.651102521 | -0.703010006 | -0.074268357 | 0.192993872  |

|                    |                  |              |              |              |              |
|--------------------|------------------|--------------|--------------|--------------|--------------|
| ENSDART00000082821 | rims4            | -0.331865117 | -0.050822604 | 0.125345094  | 0.041526523  |
| ENSDART00000082830 | KIAA0895L        | 0.216380627  | 0.852873359  | 0.835551488  | 0.401334264  |
| ENSDART00000082842 | JPH3 (1 of many) | -0.540363483 | -0.227235849 | 0.34555956   | 0.43863208   |
| ENSDART00000082937 | fscn2a           | -0.244556215 | -0.436229092 | -0.571250568 | -0.199107259 |
| ENSDART00000082944 | dock6            | 0.129469289  | 0.283374744  | 0.379764071  | 0.290753034  |
| ENSDART00000082983 | clip2            | 0.69105479   | 0.899482735  | 1.166942455  | 0.710683744  |
| ENSDART00000083002 | map1aa           | 0.023824463  | 0.057494175  | 0.8302085    | 0.470304447  |
| ENSDART00000083010 | acad9            | 0.301381925  | 0.15641426   | -0.079322034 | -0.023998781 |
| ENSDART00000083033 | sik1             | 1.146093805  | 0.631897288  | 0.512350737  | 1.123188354  |
| ENSDART00000083040 | hs3st2           | -1.059711916 | -1.469328404 | -0.190665179 | 0.30791737   |
| ENSDART00000083063 | tal1             | 0.195096671  | 0.315620662  | 0.697094431  | 0.015122988  |
| ENSDART00000083066 | asphd2           | -0.487940941 | -0.316881347 | -0.126036033 | 0.003992278  |
| ENSDART00000083085 | mtmr14           | 0.202842573  | 0.147255325  | 0.298709035  | 0.120380705  |
| ENSDART00000083100 |                  | -0.514905306 | -0.64333228  | -0.306814422 | -0.178642671 |
| ENSDART00000083126 | cidec            | 3.092638419  | 2.402632883  | 1.147285193  | -0.231828568 |
| ENSDART00000083212 | fscn1a           | -0.172521555 | 0.403697769  | 0.865067524  | 0.635846942  |
| ENSDART00000083294 | nol6             | 0.354535252  | 0.232360208  | 0.196448331  | 0.109158776  |
| ENSDART00000083359 | sec14l8          | -0.359432343 | -0.324487355 | -0.138175947 | -0.2576341   |
| ENSDART00000083367 | prcp             | -0.058674879 | -0.090308681 | -0.37460188  | -0.414832363 |
| ENSDART00000083394 | si:dkey-106c17.3 | -0.374020521 | -0.387399838 | -0.436274502 | -0.115892618 |
| ENSDART00000083407 | b4galnt4a        | -0.141610106 | -0.312267637 | -0.129787335 | -0.08625756  |
| ENSDART00000083416 | gabrd            | -0.516993342 | -0.41812722  | -0.415766575 | -0.292897654 |
| ENSDART00000083427 | slc25a29         | -0.338331576 | -0.636979798 | -0.361185623 | -0.191915619 |
| ENSDART00000083449 | dub              | 0.532370465  | 0.813595698  | 0.783551631  | -0.001039848 |
| ENSDART00000083453 | slc32a1          | -0.393731273 | -0.378330473 | -0.304655077 | -0.16825712  |
| ENSDART00000083467 | parp8            | 0.336619688  | 0.399001121  | 0.399118225  | 0.307424215  |
| ENSDART00000083569 | oaz2b            | -0.447559352 | -0.669337328 | -0.007273423 | 0.348858251  |
| ENSDART00000083572 | zgc:136864       | 0.242428375  | 0.324173418  | -0.028258929 | -0.082397484 |
| ENSDART00000083605 | tbc1d25          | 0.094218097  | 0.226970926  | 0.332123969  | 0.140604089  |
| ENSDART00000083628 | ddit3            | -0.053032847 | 0.505000026  | 0.598711637  | 0.25299651   |
| ENSDART00000083670 | CABZ01041604.1   | -0.549505735 | -0.427354636 | -0.238335089 | -0.140824262 |
| ENSDART00000083684 | pappab           | -0.696202319 | -0.797866787 | -0.223755037 | -0.122490212 |
| ENSDART00000083731 | trpv1            | 1.343483137  | 1.058081357  | 0.730442906  | -0.443240884 |
| ENSDART00000083788 | CU633832.1       | -0.745373175 | -0.699527481 | -0.49975457  | -0.170614876 |
| ENSDART00000083797 | TBC1D9B          | 0.273448063  | 0.469124554  | 0.581828184  | 0.40676136   |
| ENSDART00000083830 | sdca4            | 0.356242427  | 0.466156404  | 0.190102023  | -0.370187936 |
| ENSDART00000083890 | usp24            | 0.219267617  | 0.201082864  | 0.325420731  | 0.216599954  |
| ENSDART00000084007 | TULP2            | -0.184892554 | -0.234742374 | -0.492430755 | -0.167640019 |
| ENSDART00000084011 | cplx4a           | -0.220118176 | -0.343953082 | -0.589002173 | -0.338126511 |
| ENSDART00000084014 | cplx1            | -0.741807214 | -0.862001833 | -0.211893904 | 0.449532765  |
| ENSDART00000084024 | sv2c             | -0.354928985 | -0.65582646  | -0.477522685 | -0.220826118 |
| ENSDART00000084035 | znf532           | -0.199573234 | -0.524026601 | -0.06012509  | 0.154210784  |
| ENSDART00000084055 | fzd7a            | -0.350921417 | -0.318886271 | -0.299513467 | -0.86880486  |
| ENSDART00000084069 | iqgap2           | 1.059547107  | 0.55852141   | 0.220571876  | -0.354231411 |
| ENSDART00000084119 | si:ch1073-44g3.1 | -0.384776638 | -0.202587046 | 0.01646479   | 0.134112994  |
| ENSDART00000084131 | fam160b2         | 0.036570039  | -0.082247362 | -0.429951116 | -0.30533058  |
| ENSDART00000084135 | ubtd1a           | -0.22864625  | -0.383233305 | -0.947657938 | -0.688823144 |
| ENSDART00000084184 | aimp1            | 0.209084138  | 0.262090446  | 0.396284966  | 0.096096937  |
| ENSDART00000084238 | CABZ01057411.1   | -0.328182832 | -0.451030622 | -0.21027367  | 0.014791503  |
| ENSDART00000084264 | adcy2a           | -0.574108823 | -0.494423944 | 0.049230433  | 0.113035845  |
| ENSDART00000084353 | tbc1d10ab        | -0.174770874 | -0.349891521 | -0.619429045 | -0.244339697 |

|                    |                   |              |              |              |              |
|--------------------|-------------------|--------------|--------------|--------------|--------------|
| ENSDART00000084354 | cpeb3             | -0.1650884   | -0.603027317 | 0.172363697  | 0.2398868    |
| ENSDART00000084355 | zgc:165481        | -0.665978496 | -0.883055142 | -0.199024252 | -0.082238068 |
| ENSDART00000084373 | frmd4bb           | 0.582631667  | 0.828834738  | 0.835563839  | 0.412330382  |
| ENSDART00000084378 | crb2a             | -0.010590407 | -0.348182237 | -0.479892445 | -0.295243873 |
| ENSDART00000084381 | sybu              | -0.763177411 | -0.608942869 | -0.49552138  | -0.188366829 |
| ENSDART00000084416 | ablim1a           | -0.251488969 | -0.08542034  | 0.289459971  | 0.335228062  |
| ENSDART00000084417 | timm17b           | -0.134748392 | -0.15578708  | -0.404232794 | -0.18557959  |
| ENSDART00000084448 | psmd11a           | 0.167797415  | 0.349500372  | 0.318678727  | 0.030124317  |
| ENSDART00000084512 | pkn1a             | 0.199755386  | 0.283744748  | 0.437490279  | 0.320601704  |
| ENSDART00000084517 | vcpip1            | 0.020173722  | 0.114070565  | 0.246341011  | 0.321118019  |
| ENSDART00000084530 | coro2ba           | -0.558160234 | -0.686474796 | -0.264666518 | -0.204619183 |
| ENSDART00000084598 | vimp              | -0.003252442 | -0.076004385 | -0.324006724 | -0.304272734 |
| ENSDART00000084714 | zranb1a           | -0.285770869 | -0.28077285  | -0.104830495 | 0.014952891  |
| ENSDART00000084729 | pecam1            | 0.670854861  | 0.415048291  | 0.182847943  | 0.022819591  |
| ENSDART00000084730 | zgc:162160        | -0.758204424 | -0.82447566  | -0.164736838 | 0.207922006  |
| ENSDART00000084771 | pde9a             | 0.836076081  | 1.443202889  | 1.33955445   | 1.070879094  |
| ENSDART00000084792 | prosc             | -0.109541047 | -0.121094609 | -0.31852643  | -0.202300262 |
| ENSDART00000084803 | asic2             | -0.588195088 | -0.477145292 | -0.317477641 | -0.106481463 |
| ENSDART00000084806 | slc4a10b          | -0.257067272 | -0.281842585 | -0.215225145 | -0.174870087 |
| ENSDART00000084819 | arhgap35b         | 0.101645005  | 0.291379647  | 0.535032879  | 0.462050203  |
| ENSDART00000084861 | cish              | -0.446878588 | -0.18032932  | -1.508647694 | -1.506136587 |
| ENSDART00000084890 | si:ch211-284e13.4 | -0.124688162 | -0.262617592 | 0.237393976  | 0.369141192  |
| ENSDART00000084965 | cep104            | -0.196545786 | -0.225873142 | -0.456327943 | -0.208454995 |
| ENSDART00000085121 | sdk2b             | -0.222566721 | -0.365719278 | -0.147657392 | -0.012041014 |
| ENSDART00000085135 | tbl1x             | 0.180884774  | 0.566948084  | 0.5040067    | 0.049402086  |
| ENSDART00000085142 | map1b             | -0.213270056 | 0.210763047  | 0.526451874  | 0.312155026  |
| ENSDART00000085210 | cacna1ha          | -0.413195046 | -0.405391107 | -0.236177845 | 0.006546496  |
| ENSDART00000085230 | at11              | -0.283512177 | 0.138626411  | 0.619353197  | 0.442930265  |
| ENSDART00000085252 | pqlc3             | -0.117366098 | -0.27675705  | -0.43476147  | -0.253093536 |
| ENSDART00000085253 | mid1              | -0.357661223 | -0.330080838 | -0.002902011 | 0.078651096  |
| ENSDART00000085263 | SELENOI           | 0.036305982  | 0.149651758  | 0.460720877  | 0.164646013  |
| ENSDART00000085277 | pfkmb             | 0.010653815  | -0.414332737 | -0.69351419  | -0.144457554 |
| ENSDART00000085284 | pfkla             | -0.114418267 | -0.338020067 | -0.177396742 | 0.008723864  |
| ENSDART00000085294 | tnfrsf9a          | -0.468498688 | -0.352709139 | -0.665957795 | -1.403982945 |
| ENSDART00000085309 | dpcd              | 0.675929667  | 0.665840567  | 0.458693669  | 0.16198721   |
| ENSDART00000085319 | sos2              | 0.062155314  | 0.173737983  | 0.464042198  | 0.208637802  |
| ENSDART00000085370 | kcnq5b            | -0.41441932  | -0.216130879 | -0.15503054  | -0.008181026 |
| ENSDART00000085388 | bmp3              | -0.146774305 | 1.240822845  | 1.494378971  | 0.416428855  |
| ENSDART00000085438 | rps6ka5           | -0.245466951 | -0.387017016 | -0.309352273 | -0.119154274 |
| ENSDART00000085442 | mut               | -0.094284216 | -0.181855717 | -0.336054518 | -0.342951233 |
| ENSDART00000085453 | cluhb             | -0.484145834 | -0.430773206 | 0.678836708  | -0.017745757 |
| ENSDART00000085472 | grm2a             | -0.506007863 | -0.654883229 | -0.268518199 | 0.087304206  |
| ENSDART00000085522 | hsqb6             | -0.63697673  | -0.382982575 | -0.524822831 | -0.392317705 |
| ENSDART00000085528 | zgc:158659        | 0.601601674  | 0.738184978  | 0.82446023   | 0.805817257  |
| ENSDART00000085565 | capn15            | -0.382220369 | -0.426351921 | -0.021041552 | 0.033591442  |
| ENSDART00000085573 | rgs7bpa           | -0.750985181 | -0.701592527 | -0.219110071 | -0.146877341 |
| ENSDART00000085612 | pcdh7b            | -0.228836495 | -0.682608646 | -0.209101131 | 0.321031694  |
| ENSDART00000085675 | clstn2            | -0.244638643 | -0.37840099  | -0.228974377 | 0.094704371  |
| ENSDART00000085684 | ttl11             | -0.16810055  | 0.020727161  | 0.348458395  | 0.408691778  |
| ENSDART00000085693 | gpm6bb            | -0.236628216 | -0.325741908 | -0.400571921 | -0.218025638 |
| ENSDART00000085716 | mtmr10            | 0.168573884  | -0.120117023 | -0.772748173 | -0.357648365 |

|                    |                  |              |              |              |              |
|--------------------|------------------|--------------|--------------|--------------|--------------|
| ENSDART00000085719 | si:ch211-10a23.2 | 0.141906082  | 0.927202925  | 1.15606105   | 0.59243708   |
| ENSDART00000085743 | AL935194.1       | -0.774745358 | -0.68914542  | -0.32626184  | 0.039334462  |
| ENSDART00000085764 | PLOD3            | 0.414167142  | 0.202506542  | 0.107388816  | -0.10168282  |
| ENSDART00000085894 | pgm5             | 1.697021259  | 1.783911903  | 2.232651815  | 1.757015772  |
| ENSDART00000085993 | pxnb             | 0.457322476  | 0.299419771  | 0.2051328    | -0.178681091 |
| ENSDART00000086051 | mecom            | -0.550304416 | -0.298852875 | -0.293768303 | -1.334615988 |
| ENSDART00000086117 | kcnab2b          | -0.362026581 | -0.574025944 | -0.45188395  | -0.145196155 |
| ENSDART00000086131 | pik3c2a          | -0.071329777 | -0.019579026 | -0.128057314 | -0.294437789 |
| ENSDART00000086176 | nckap1           | -0.438983658 | -0.533344195 | -0.439721489 | -0.241138066 |
| ENSDART00000086181 | cabp7b           | -0.513778995 | -0.579329622 | -0.46209057  | -0.104843884 |
| ENSDART00000086263 | mettl7a          | -0.420009286 | -0.158826062 | -0.791334734 | -0.334080113 |
| ENSDART00000086281 | mavs             | 3.81695815   | 3.176539113  | 3.535647274  | 1.650162791  |
| ENSDART00000086301 | irge4            | 0.875091617  | 0.681146857  | 1.737500297  | 0.803175592  |
| ENSDART00000086333 | jarid2a          | -0.109318405 | 0.11715985   | 0.373609719  | 0.35216542   |
| ENSDART00000086409 | dync1i1          | -0.021724393 | 0.427961112  | 0.551451734  | 0.438467635  |
| ENSDART00000086434 | tmcc2            | 0.022092982  | 0.338134833  | 0.850580716  | 0.840264518  |
| ENSDART00000086495 | zgc:154077       | -0.133678102 | -0.278559633 | -0.319223928 | -0.190822097 |
| ENSDART00000086537 |                  | 0.422133332  | 0.379254853  | 0.651471983  | 0.472158305  |
| ENSDART00000086617 | gabbr2           | -0.577324776 | -0.926125922 | -0.433004274 | 0.052999603  |
| ENSDART00000086619 | prkca            | -0.184045571 | -0.418285198 | -0.5357326   | -0.310736719 |
| ENSDART00000086664 | trpm1a           | 2.715802028  | 4.516032094  | 3.238851669  | 3.187690164  |
| ENSDART00000086720 | nfasca           | -0.417931887 | -0.576283691 | -0.313335716 | -0.150054847 |
| ENSDART00000086753 | dapk2a           | 0.129419785  | -0.339935803 | -1.219284243 | -0.369104907 |
| ENSDART00000086797 | adgrl3.1         | -0.114053477 | -0.068166121 | 0.465121947  | 0.57391191   |
| ENSDART00000086867 | tapt1b           | -0.153549174 | -0.259614839 | -0.218992302 | -0.161727037 |
| ENSDART00000086905 | nrrn1lb          | -0.455174799 | -0.417502528 | -0.690990621 | -0.656036806 |
| ENSDART00000086946 | mov10b.1         | 0.41644893   | 0.305142124  | 1.89370555   | 0.04709269   |
| ENSDART00000086952 | st14a            | -0.283184933 | 0.988901668  | 1.786647129  | 1.271482733  |
| ENSDART00000086994 | nat15            | -0.144704703 | -0.149678764 | -0.337458722 | -0.152039739 |
| ENSDART00000087070 | abcc5            | 0.063506972  | -0.209331316 | -0.331966374 | -0.070006315 |
| ENSDART00000087097 | ogfrl1           | -0.189021726 | -0.350288897 | -0.29146473  | 0.000580163  |
| ENSDART00000087105 | myom2a           | 2.177324505  | 3.608086766  | 3.587707417  | 2.779461648  |
| ENSDART00000087107 | eif4g1a          | 0.252655247  | -0.051267066 | 0.413833734  | 0.330964133  |
| ENSDART00000087112 | pfdn4            | 0.448340647  | 0.452924674  | 0.218263471  | -0.022743355 |
| ENSDART00000087114 | alg5             | 0.317519293  | 0.464842808  | 0.220188706  | 0.059168575  |
| ENSDART00000087115 | rims1b           | -0.155072254 | 0.041830315  | 0.378907446  | 0.287621284  |
| ENSDART00000087118 | xylt1            | -0.272537601 | -0.39007956  | -0.067871098 | 0.053209242  |
| ENSDART00000087148 | cbln4            | -0.802680954 | -0.769511703 | -0.146403482 | 0.304907793  |
| ENSDART00000087191 | mark4a           | -0.415170271 | -0.372344968 | 0.042679549  | 0.108705644  |
| ENSDART00000087196 | zgc:153240       | -0.381380177 | -0.392146036 | -0.277166885 | -0.130863015 |
| ENSDART00000087204 | dusp3a           | -0.327203373 | -0.053264752 | 0.592884224  | 0.622404395  |
| ENSDART00000087280 | cacnb3a          | -0.323388935 | -0.465191463 | 0.268224123  | 0.533679905  |
| ENSDART00000087295 | ppp1r9a          | -0.056007418 | -0.599550993 | -0.15522086  | -0.017719681 |
| ENSDART00000087300 | gabrb3           | -0.106002759 | -0.319333142 | -0.574890474 | -0.11105969  |
| ENSDART00000087311 | oca2             | 0.449332393  | 0.338475194  | -0.09076694  | -0.174077968 |
| ENSDART00000087329 | znf438           | -0.159611183 | -0.256202272 | -0.311134609 | -0.110177372 |
| ENSDART00000087339 | cdon             | -0.358409006 | -0.160970657 | -0.495687672 | -0.865355598 |
| ENSDART00000087426 | bcl11aa          | -0.367520296 | -0.334252656 | 0.232372171  | 0.511638417  |
| ENSDART00000087441 | GFOD1            | -0.421601041 | -0.219799435 | -0.160457067 | 0.058971995  |
| ENSDART00000087449 | CR847968.1       | -0.323687626 | -0.307881439 | 0.124728655  | 0.148402357  |
| ENSDART00000087450 | klf13            | -0.22166629  | -0.059571459 | 0.622443971  | 0.288396102  |

|                    |                   |              |              |              |              |
|--------------------|-------------------|--------------|--------------|--------------|--------------|
| ENSDART00000087565 | eva1a             | -0.378976356 | -0.384921525 | -0.250389955 | -0.168669364 |
| ENSDART00000087570 | BRSK2 (1 of many) | -0.035673495 | -0.289130617 | -0.495870531 | -0.115059951 |
| ENSDART00000087586 | c2cd4a            | -0.882018106 | -1.482044104 | -0.368555759 | 0.13043866   |
| ENSDART00000087624 | arhgef1b          | 4.493077515  | 3.634214641  | 2.657484566  | 1.969740568  |
| ENSDART00000087643 | tesk2             | -0.250604524 | -0.077411225 | -0.349635246 | -0.097357509 |
| ENSDART00000087654 | adcy6a            | -0.242190723 | -0.49624198  | -0.145481294 | -0.053244608 |
| ENSDART00000087726 | igf2bp1           | 0.052821083  | 0.330444102  | 0.755149975  | 0.389599697  |
| ENSDART00000087857 | unc5db            | -0.464548804 | -0.771046574 | -0.267052184 | 0.0901494    |
| ENSDART00000087884 | ccdc85b           | -0.309651273 | -0.084106622 | -0.027008739 | -0.094025951 |
| ENSDART00000087991 | fndc3bb           | 0.509196457  | 0.583942244  | 0.486760061  | 0.158477497  |
| ENSDART00000088026 | prmt5             | 0.184159659  | 0.212388642  | 0.353449866  | 0.122961111  |
| ENSDART00000088027 | ssx2ipb           | -0.254273665 | -0.300537366 | -0.659689526 | -0.365610708 |
| ENSDART00000088033 | trpm3             | -1.238410284 | -1.468940768 | -0.88192323  | -0.200606191 |
| ENSDART00000088042 | myo10l3           | 0.440398704  | 0.46516816   | 0.325219038  | -0.023584336 |
| ENSDART00000088093 | sipa1l2           | -0.401627573 | -0.319202181 | 0.366701976  | 0.056822769  |
| ENSDART00000088141 | ankrd34bb         | 1.379198636  | 2.420328938  | 2.155206475  | 1.17838067   |
| ENSDART00000088146 | ensab             | -0.270112525 | -0.281607362 | -0.344659286 | -0.084313447 |
| ENSDART00000088159 | nrxn1a            | -0.55423697  | -0.307440551 | 0.007663974  | -0.036725507 |
| ENSDART00000088178 | nrxn1a            | -0.424942944 | -0.357890595 | -0.01594532  | 0.150075885  |
| ENSDART00000088179 | nrxn3a            | -0.554627027 | -0.919560714 | 0.023875656  | 0.130979956  |
| ENSDART00000088199 | zgc:162707        | -0.481388546 | -0.51007365  | -0.179950315 | -0.039369231 |
| ENSDART00000088240 | sypb              | -0.232689126 | -0.445901517 | -0.375392134 | -0.149058325 |
| ENSDART00000088249 | hcn4l             | -0.487910369 | -0.340719397 | 0.02727434   | 0.039415999  |
| ENSDART00000088270 | yjefn3            | -0.490178998 | -0.350279664 | -0.399921095 | -0.213170988 |
| ENSDART00000088290 | raph1b            | 0.812305175  | 0.733830465  | 0.671238907  | 0.330964135  |
| ENSDART00000088336 | setdb1a           | -0.249989255 | -0.274821833 | -0.108228373 | -0.04389578  |
| ENSDART00000088342 | cytip             | 0.001918005  | -0.070156162 | -0.471206178 | -0.369058853 |
| ENSDART00000088364 | kif1aa            | -0.06544832  | 0.34113245   | 0.707853532  | 0.648494399  |
| ENSDART00000088488 | opa3              | -0.282490417 | -0.240544978 | -0.173330249 | -0.094645025 |
| ENSDART00000088513 | gnl1              | 0.102638572  | 0.086645512  | -0.243843993 | -0.223952657 |
| ENSDART00000088569 | nyx               | -0.258999398 | -0.197132955 | -0.26271962  | -0.211182996 |
| ENSDART00000088603 | UNC13A            | -0.361581411 | -0.491389738 | -0.199237568 | 0.353821     |
| ENSDART00000088639 | wscd2             | -0.261498814 | -0.268790529 | -0.287619442 | -0.123420729 |
| ENSDART00000088643 | col15a1b          | -0.287399924 | -0.285830353 | -0.360508672 | -0.35081124  |
| ENSDART00000088653 | prss12            | -0.641371677 | 0.068962263  | 0.215098805  | 0.069158882  |
| ENSDART00000088687 | rxfp3.2b          | -0.990302103 | -0.900399551 | -0.191860941 | 0.37665355   |
| ENSDART00000088690 | lman2             | -0.00791489  | -0.046317548 | -0.243638306 | -0.186515184 |
| ENSDART00000088818 | fhod3b            | -0.341939339 | -0.263444238 | -0.179945034 | 0.005787251  |
| ENSDART00000088833 | si:ch73-233f7.1   | -1.214678988 | -0.552820604 | -0.229157577 | 0.532052231  |
| ENSDART00000088881 | git2a             | -0.368814104 | -0.568589271 | -0.278482365 | -0.109167728 |
| ENSDART00000088908 | srgap1a           | -0.173831935 | -0.499543132 | -0.183148374 | 0.021193005  |
| ENSDART00000088973 | syt12a            | 0.735131572  | 0.479031428  | -0.049007315 | -0.597552798 |
| ENSDART00000089012 | kif1ab            | -0.037675888 | 0.080069758  | 0.360995087  | 0.379282318  |
| ENSDART00000089015 | zbtb7a            | -0.478666207 | -0.203919761 | -0.738823143 | -0.713706626 |
| ENSDART00000089033 | lingo3a           | -0.421566075 | -0.428623374 | -0.267183911 | -0.077777224 |
| ENSDART00000089042 | kcnh4b            | -0.293363138 | -0.305961812 | -0.46205676  | -0.207459851 |
| ENSDART00000089076 | dot1l             | 0.094529933  | 0.165735937  | 0.448240264  | 0.463978672  |
| ENSDART00000089079 | mpnd              | 0.049906779  | 0.784892334  | 0.951903848  | 0.691834891  |
| ENSDART00000089126 | trhde.2           | -0.409075032 | -0.405058445 | -0.383617798 | -0.218104015 |
| ENSDART00000089133 | rufy2             | -0.198896291 | 0.087437671  | 0.267347782  | 0.283743397  |
| ENSDART00000089141 | fsd1              | 0.140911421  | 0.537063785  | 0.66216846   | 0.489473142  |

|                    |                 |              |              |              |              |
|--------------------|-----------------|--------------|--------------|--------------|--------------|
| ENSDART00000089158 | hmha1a          | 1.15366088   | 0.773436896  | 0.705540127  | -0.035689576 |
| ENSDART00000089161 | CCDC181         | -0.238708752 | -0.276570098 | -0.364394143 | -0.212879757 |
| ENSDART00000089246 | elmod1          | -0.367956253 | -0.511095234 | 0.063835683  | 0.117723407  |
| ENSDART00000089325 | mief1           | -0.272432924 | -0.240984001 | -0.06454421  | 0.031387691  |
| ENSDART00000089339 | dph7            | -0.317220664 | -0.267955931 | -0.402220665 | -0.245139947 |
| ENSDART00000089342 | cfap126         | -0.196227391 | -0.233968621 | -0.449699376 | -0.526724945 |
| ENSDART00000089408 | shdb            | -0.379456562 | -0.060183647 | 0.137084622  | 0.164920585  |
| ENSDART00000089442 | klhl5           | -0.428861339 | -0.43123859  | -0.099854083 | -0.052484669 |
| ENSDART00000089445 | agap1           | 0.111728293  | 0.12652166   | 0.321279752  | 0.223152778  |
| ENSDART00000089488 | sytl5           | -0.2422586   | -0.383469303 | 0.0006109    | 0.143303123  |
| ENSDART00000089526 | otc             | -0.228950714 | -0.50691522  | -0.941930968 | -0.587900491 |
| ENSDART00000089540 | sacm1la         | -0.121729942 | -0.218997931 | -0.253159012 | -0.069593401 |
| ENSDART00000089549 | fam65a          | 0.138661993  | 0.299682143  | 0.16216271   | 0.248418418  |
| ENSDART00000089574 | tub             | -0.338880988 | -0.401453479 | -0.101730157 | -0.038037712 |
| ENSDART00000089577 | cacnb4b         | -0.344473142 | 0.166216688  | 0.479684005  | 0.375262058  |
| ENSDART00000089699 | prrt1           | -0.603201784 | -0.702306626 | -0.280611263 | -0.047540659 |
| ENSDART00000089748 | rorb            | -0.330969943 | -0.539847879 | -0.425468683 | -0.138099942 |
| ENSDART00000089867 | ppp2r2cb        | -0.452836704 | -0.44451904  | -0.189867818 | -0.082146078 |
| ENSDART00000089923 | znf652          | -0.30560984  | -0.322535846 | -0.127141181 | -0.092457617 |
| ENSDART00000089961 | sik2a           | -0.349078539 | -0.249421195 | -0.402456418 | 0.05469833   |
| ENSDART00000089967 | cacna1bb        | -0.202836628 | -0.60611593  | -0.329318476 | -0.282649478 |
| ENSDART00000089968 | rasl10a         | -0.525764509 | -0.884552715 | -0.504672449 | -0.419223822 |
| ENSDART00000089992 | hmg7            | -0.150988875 | -0.15001014  | -0.251989002 | -0.139708395 |
| ENSDART00000089999 | b4galt3         | -0.174643035 | -0.177020263 | -0.279641129 | -0.298606277 |
| ENSDART00000090010 | phex            | -0.386748819 | -0.231869791 | -0.214849122 | -0.613717457 |
| ENSDART00000090019 | zeb2b           | -0.694941899 | -0.428168304 | -0.296660745 | 0.024845807  |
| ENSDART00000090079 | synm            | -0.113622285 | -0.399027729 | -0.70355851  | -0.251171145 |
| ENSDART00000090174 | dock9b          | 0.356010204  | 0.810416379  | 0.943578275  | 0.58912554   |
| ENSDART00000090191 | flcn            | 0.595641364  | 0.372738928  | 0.082710169  | 0.079174241  |
| ENSDART00000090221 | cdc42ep5        | 0.276662145  | 0.611781241  | 0.632201471  | -0.020036411 |
| ENSDART00000090235 | nfixb           | -0.570962215 | -0.312719979 | -0.289246101 | -0.209164384 |
| ENSDART00000090252 | atp2b3a         | -0.293678426 | -0.382019678 | -0.276234519 | -0.034568861 |
| ENSDART00000090266 | gpd2            | 0.305577979  | 0.440771229  | 0.397599751  | 0.146739419  |
| ENSDART00000090292 | ctnnd2b         | -0.150466015 | -0.062584536 | 0.302491723  | 0.338163791  |
| ENSDART00000090306 | xpr1a           | -0.158299732 | -0.301120383 | 0.179396195  | 0.424625304  |
| ENSDART00000090335 | hipk2           | -0.356266924 | -0.261702878 | -0.185362868 | -0.057591831 |
| ENSDART00000090397 | kiaa1549la      | -0.446832614 | -0.575803117 | -0.232865535 | 0.10265337   |
| ENSDART00000090406 | dock11          | 0.704689621  | 0.535408523  | 0.615472635  | 0.363574103  |
| ENSDART00000090483 | cplx3a          | -0.167017721 | -0.181539522 | -0.397723314 | -0.182035461 |
| ENSDART00000090484 | tecpr1a         | -0.079583722 | -0.244227266 | -0.30265493  | -0.135390116 |
| ENSDART00000090521 | ankle2          | 0.59590492   | 0.614380049  | 0.713135872  | 0.291410446  |
| ENSDART00000090528 | rhoca           | 0.570199757  | 0.738551724  | 0.41277501   | -0.074138712 |
| ENSDART00000090534 | ulk1a           | 0.04466428   | 0.367530579  | 0.126656159  | 0.034855767  |
| ENSDART00000090548 | ASTE1           | 0.186068328  | 0.308540808  | 0.373512724  | 0.303370928  |
| ENSDART00000090580 | si:dkey-215k6.1 | -0.353341621 | -0.406611115 | -0.330167398 | -0.116132596 |
| ENSDART00000090596 | fgf12b          | -0.346267349 | -0.034488788 | 0.704892235  | 0.660670447  |
| ENSDART00000090611 | sh3gl2a         | -0.3620314   | -0.426828792 | -0.627861098 | -0.256916064 |
| ENSDART00000090669 | pleca           | -0.254130273 | -0.426440212 | -0.236918819 | -0.12154508  |
| ENSDART00000090689 | brat1           | 0.263072231  | 0.449900152  | 0.263104838  | 0.157050832  |
| ENSDART00000090709 | coq7            | -0.258539203 | -0.273311663 | -0.220704286 | -0.134757577 |
| ENSDART00000090711 | ltc4s           | 0.402288552  | 0.209272555  | 0.13658761   | 0.029040107  |

|                    |                 |              |              |              |              |
|--------------------|-----------------|--------------|--------------|--------------|--------------|
| ENSDART00000090748 | pcdh1g9         | 0.151679401  | 0.129768355  | 0.681696549  | 0.559518569  |
| ENSDART00000090757 | kat2b           | -0.251752686 | -0.26045996  | -0.262277009 | -0.210249532 |
| ENSDART00000090771 | cyth1a          | 1.102348748  | 1.012723243  | 0.839881021  | 0.442796833  |
| ENSDART00000090844 | zgc:153018      | -0.414733046 | -0.080390611 | -0.214556251 | -0.032786964 |
| ENSDART00000090864 | lmod3           | 0.210035398  | 1.148748445  | 1.650370875  | 1.365208896  |
| ENSDART00000090874 | kcnh7           | 0.089634054  | 0.066677874  | 0.800119794  | 0.739010611  |
| ENSDART00000090883 | gpnmb           | 1.78024327   | 1.792109343  | 1.484400673  | -0.264951498 |
| ENSDART00000091004 | pcdh1a          | -0.630879138 | -0.627674521 | -0.227167517 | 0.17418403   |
| ENSDART00000091017 | pkn1b           | 0.119108789  | 0.041947386  | 0.390816496  | 0.137505167  |
| ENSDART00000091021 | col10a1a        | 0.454586287  | 3.186498396  | 3.689025905  | 2.153861861  |
| ENSDART00000091124 | aifm3           | -0.238811768 | -0.279253276 | -0.598306352 | -0.861256088 |
| ENSDART00000091140 | snx21           | 0.278697916  | 0.637246869  | 0.128859029  | 0.534229621  |
| ENSDART00000091151 | nell2b          | -0.408104365 | -0.533629775 | -0.525750199 | -0.236120482 |
| ENSDART00000091156 | tacc1           | -0.166984032 | -0.162668339 | -0.396514006 | -0.330157066 |
| ENSDART00000091158 | irg1l           | 1.781534333  | 2.6026377    | 1.369996198  | -0.413577442 |
| ENSDART00000091183 | erfl3           | -0.064022984 | -0.222171088 | -0.380622737 | -0.084018803 |
| ENSDART00000091205 | sdk1b           | -0.11409829  | -0.274173881 | -0.261923413 | -0.147107702 |
| ENSDART00000091241 | si:ch73-22o12.1 | -0.053659471 | 0.086463787  | 0.414689493  | 0.463272551  |
| ENSDART00000091252 | spata13         | 0.108055641  | -0.023595371 | -0.309799561 | -0.91906317  |
| ENSDART00000091271 | prkg2l          | -0.404320096 | -0.412762377 | -0.544649422 | -0.030408858 |
| ENSDART00000091331 | prodha          | -0.295055194 | -0.294720047 | -0.215860993 | -0.495616796 |
| ENSDART00000091351 | gk5             | 0.51312557   | 0.289440127  | 0.273716274  | -0.08764101  |
| ENSDART00000091409 | smarcad1a       | 0.370815487  | 0.374702329  | 0.447117461  | 0.290143851  |
| ENSDART00000091416 | cntn3a.1        | -0.478191534 | -0.24621663  | -0.434975173 | -0.073764559 |
| ENSDART00000091452 | TULP2           | -0.183522253 | -0.233522919 | -0.588056807 | -0.14814607  |
| ENSDART00000091472 | kcnv2b          | -0.549604515 | -0.416623158 | -0.289225353 | -0.099467789 |
| ENSDART00000091489 | ppp1r9bb        | -0.563706295 | -0.346664158 | -0.080794638 | 0.037246954  |
| ENSDART00000091508 | FAM83G          | 0.624622597  | 0.848983587  | 0.795841019  | 0.137374674  |
| ENSDART00000091532 | ndnf            | -0.379105533 | -0.357674977 | -0.332342823 | -0.25490154  |
| ENSDART00000091584 | zgc:158785      | -0.030208367 | -0.597188759 | -0.577152486 | -0.343586348 |
| ENSDART00000091599 | sbfl1           | -0.602535014 | -0.60076227  | 0.11831949   | 0.138965635  |
| ENSDART00000091612 | dab2ipa         | -0.32378487  | -0.312766229 | -0.160534626 | -0.215968275 |
| ENSDART00000091615 | iffo1a          | -0.255558776 | -0.319129649 | -0.402938235 | -0.1114809   |
| ENSDART00000091620 | atp8a1          | -0.02813322  | -0.262306637 | -0.342910163 | -0.163047911 |
| ENSDART00000091644 | abi1b           | 0.181595456  | 0.359192672  | 0.565695572  | 0.32038751   |
| ENSDART00000091662 | noc2l           | 0.778877814  | 0.364993344  | 0.393512667  | -0.105586454 |
| ENSDART00000091664 | apc2            | -0.58155429  | -0.22615315  | 0.136652181  | 0.006999355  |
| ENSDART00000091683 | alkbh5          | -0.400075016 | -0.448742364 | -0.161106699 | -0.178285375 |
| ENSDART00000091707 | dbpa            | -0.158262702 | -0.327851995 | -0.357551076 | -0.129469939 |
| ENSDART00000091726 | fam78ba         | -0.542782218 | -0.34207093  | 0.322203074  | 0.384590985  |
| ENSDART00000091727 | ntrk3a          | -0.313031117 | -0.882724333 | -0.168396888 | 0.114845125  |
| ENSDART00000091729 | mlc1            | -0.413445193 | -0.441446959 | -0.597560289 | -0.400243567 |
| ENSDART00000091780 | rc3h2           | -0.185144786 | -0.339077629 | -0.231755111 | -0.132461257 |
| ENSDART00000091818 | tulp4b          | -0.531343855 | -0.277019809 | 0.128892269  | 0.551121944  |
| ENSDART00000091899 | ccm2l           | 0.082170149  | -0.344528731 | -0.637200318 | -0.089681617 |
| ENSDART00000091901 | psmd14          | 0.227724961  | 0.262600592  | 0.258422041  | 0.051950672  |
| ENSDART00000091923 | slc4a10a        | 0.0431458    | -0.481021076 | -0.208884142 | 0.00832231   |
| ENSDART00000091932 | gusb            | -0.012758115 | -0.102829729 | -0.25264355  | -0.30752198  |
| ENSDART00000091955 | nrxn2b          | -0.363238969 | -0.38605701  | -0.167716958 | 0.046918181  |
| ENSDART00000092013 | tmtc1           | -0.379958165 | -0.299353758 | -0.293525457 | -0.123093715 |
| ENSDART00000092050 | stab1           | 0.830009942  | 0.662655195  | 0.610953846  | 0.245694157  |



|                    |                   |              |              |              |              |
|--------------------|-------------------|--------------|--------------|--------------|--------------|
| ENSDART00000092051 | CABZ01081780.1    | -0.497076796 | -0.683547714 | -0.447049069 | -0.155316145 |
| ENSDART00000092114 | ERBB4 (1 of many) | -0.124937285 | -0.553537291 | -0.521885412 | -0.338309306 |
| ENSDART00000092164 | prmt2             | 0.865577917  | 0.607769301  | 0.137454327  | 0.149744108  |
| ENSDART00000092182 | ppm1la            | -0.411282562 | -0.137536548 | 0.156346356  | 0.193635075  |
| ENSDART00000092183 | lrrc3b            | -0.469734111 | -0.850621377 | -0.496353665 | -0.22903801  |
| ENSDART00000092239 | lix1l             | -0.01751945  | 0.310063812  | 0.327664672  | 0.131969727  |
| ENSDART00000092250 | btbd11a           | -0.250819977 | -0.42148278  | -0.144893414 | 0.093892491  |
| ENSDART00000092257 | PLD5              | -0.97635635  | -0.828911686 | 0.040708181  | 0.36058098   |
| ENSDART00000092270 | r3hdm4            | 0.109330042  | 0.341009284  | 0.430965659  | 0.322117566  |
| ENSDART00000092290 | pcdh9             | -0.617638559 | -1.059395061 | -0.632995564 | 0.015160294  |
| ENSDART00000092356 | neto1             | -0.404606374 | -0.302098716 | -0.383296194 | -0.272667962 |
| ENSDART00000092357 | sgsm2             | -0.379055867 | -0.375730796 | -0.097265456 | -0.053118339 |
| ENSDART00000092381 | pcloa             | -0.033919449 | -0.560249847 | -0.672386944 | -0.219295292 |
| ENSDART00000092389 | nup210            | 0.743287563  | 0.315006844  | 0.505674911  | 0.088834448  |
| ENSDART00000092406 | apba2a            | 0.032423751  | 0.148342908  | 0.468800105  | 0.354794985  |
| ENSDART00000092416 | rabl2             | -0.237808365 | -0.250658742 | -0.360133928 | -0.144079351 |
| ENSDART00000092435 | mgat4a            | 0.252074722  | 0.11851857   | 0.178053587  | 0.019110648  |
| ENSDART00000092493 | ptprt             | -0.175495642 | -0.444255461 | -0.308001112 | -0.058909837 |
| ENSDART00000092524 | rasa3             | -0.348887401 | -0.411266738 | -0.465367898 | -0.079002088 |
| ENSDART00000092646 | lrrc73            | -0.475821333 | -0.175234523 | 0.140632325  | 0.202367883  |
| ENSDART00000092647 | cers1             | -0.35221666  | -0.292832737 | -0.390981877 | -0.135220693 |
| ENSDART00000092665 | sreb1             | -0.417658309 | -0.274360919 | 0.114636817  | 0.022214824  |
| ENSDART00000092690 | sreb2             | -0.007030288 | 0.441941306  | 0.773565631  | 0.436893785  |
| ENSDART00000092691 | pea15             | -0.578361557 | -0.742039167 | -0.342285902 | -0.180997926 |
| ENSDART00000092884 | lrrc58b           | 0.353547699  | 0.596933578  | 0.36096561   | 0.06120599   |
| ENSDART00000092948 | pe1i1b            | 0.088983174  | 0.130189996  | 0.342697853  | 0.254903056  |
| ENSDART00000093000 | PLEKHB1           | -0.366311468 | -0.143931789 | -0.403311135 | -0.393296015 |
| ENSDART00000093003 | syt7a             | -0.241216791 | -0.606859779 | -0.288317918 | -0.007740028 |
| ENSDART00000093005 | DGKI              | -0.31222183  | -0.268945726 | 0.173367169  | 0.253167333  |
| ENSDART00000093093 | coro2bb           | -0.315281988 | -0.251087256 | -0.471013192 | -0.151819548 |
| ENSDART00000093149 | ddx21             | 0.146331643  | 0.244276574  | 0.410170406  | 0.14971067   |
| ENSDART00000093155 | hpse              | 0.712086441  | 0.364284216  | 0.211412521  | -0.486650265 |
| ENSDART00000093163 | galnt11           | -0.148415291 | -0.19498093  | -0.27912109  | -0.157806623 |
| ENSDART00000093166 | nrxn1b            | 0.047890691  | -0.072856775 | -0.26075298  | -0.08007638  |
| ENSDART00000093193 | CABZ01090021.1    | 0.615976841  | 0.876382917  | 0.705233449  | 0.369811976  |
| ENSDART00000093199 | tead3b            | 1.081516431  | 0.86043279   | 0.478204597  | -0.215799128 |
| ENSDART00000093236 | TULP3             | -0.257622072 | -0.196815312 | -0.318097587 | -0.153320475 |
| ENSDART00000093279 | spi1b             | 0.891535687  | 0.563855895  | 0.100587929  | -0.531177734 |
| ENSDART00000093304 | nrm               | 0.448051883  | 0.19826204   | 0.059665608  | 0.061320945  |
| ENSDART00000093310 | celf5a            | -0.268154664 | -0.455004312 | 0.014815598  | 0.070405312  |
| ENSDART00000093331 | rreb1a            | -0.024901133 | -0.155149005 | -0.517234878 | -0.050769944 |
| ENSDART00000097176 | CABZ01090749.1    | 1.277443607  | 2.06888261   | 1.727457254  | 0.676889483  |
| ENSDART00000097194 | serinc5           | 0.184853776  | 0.289193819  | 0.374387724  | 0.244648582  |
| ENSDART00000097198 | sc:d217           | 2.007573379  | 2.429847079  | 2.207258628  | 1.807569646  |
| ENSDART00000097248 | aldh2.2           | 0.244379894  | -0.20748537  | -0.365189715 | -0.463727898 |
| ENSDART00000097249 | aldh2.2           | -1.049924711 | -1.051244298 | -1.854940324 | -3.57887137  |
| ENSDART00000097330 | dnm1b             | -0.51283412  | -0.480365631 | 0.101619237  | 0.531582232  |
| ENSDART00000097338 | napaa             | -0.21867082  | -0.198889828 | -0.441263528 | -0.268359175 |
| ENSDART00000097359 | dnajc25           | 0.258588311  | 0.413120409  | 0.370076595  | 0.197964188  |
| ENSDART00000097460 | hmgcra            | -0.174557714 | 0.058201434  | 0.38988663   | 0.431312576  |
| ENSDART00000097466 | fam169aa          | -0.25560307  | -0.389662586 | -0.539552997 | -0.303655    |

|                    |                    |              |              |              |              |
|--------------------|--------------------|--------------|--------------|--------------|--------------|
| ENSDART00000097670 | ggcx               | -0.008080389 | -0.071755289 | -0.320769539 | -0.236029667 |
| ENSDART00000097685 | LINGO3 (1 of many) | -0.608919806 | -0.847171007 | -0.317394062 | -0.126526617 |
| ENSDART00000097695 | cntnap3            | -0.160493697 | -0.529313782 | -0.088115665 | 0.248028839  |
| ENSDART00000097731 | valopa             | -0.109885721 | -0.121152137 | -0.343824948 | -0.490387529 |
| ENSDART00000097738 | panx1b             | 0.147981258  | 0.33056409   | 0.233249696  | 0.121977096  |
| ENSDART00000097770 | gc3                | -0.462816548 | -0.433977737 | -0.284956472 | -0.124147363 |
| ENSDART00000097792 | tnikb              | 0.209649579  | 0.123927361  | 0.351444411  | 0.3418539    |
| ENSDART00000097822 | atp1b2b            | -0.302706184 | -0.327970639 | -0.363261939 | -0.05554983  |
| ENSDART00000097934 | cdh4               | -0.709680135 | -0.297434282 | -0.207521755 | 0.118311374  |
| ENSDART00000097935 | si:dkey-226m8.10   | -0.692305988 | -0.817395111 | -0.44855289  | 0.050175879  |
| ENSDART00000097939 | zcchc2             | -0.095224914 | -0.152148503 | 0.35105086   | 0.119260586  |
| ENSDART00000098038 | dscamb             | -0.314235441 | -0.377418781 | -0.108405688 | -0.031209686 |
| ENSDART00000098045 | gas1b              | -0.225161666 | -0.17230943  | -0.331649886 | -0.52065088  |
| ENSDART00000098057 | ftr19              | 0.135898929  | 0.299355243  | 0.876453981  | -0.013001669 |
| ENSDART00000098058 | ftr22              | 0.119426338  | -0.017860927 | 0.367700006  | -0.042033613 |
| ENSDART00000098072 | myhz1.1            | -1.045546706 | 2.305130821  | 3.388084443  | 2.053099835  |
| ENSDART00000098082 | GJD2 (1 of many)   | -0.795483498 | -0.746707283 | 0.031300804  | 0.456345915  |
| ENSDART00000098173 | vapal              | -0.239328654 | -0.269836839 | -0.058452226 | -0.037670486 |
| ENSDART00000098209 | sirt1              | 0.078955516  | 0.10137907   | 0.304759128  | 0.182124247  |
| ENSDART00000098263 | kctd9a             | -0.029411295 | -0.237424393 | -0.359070767 | -0.190010537 |
| ENSDART00000098284 | ftr14              | 0.428599203  | 0.304151818  | 1.741077228  | -0.09285898  |
| ENSDART00000098285 | atf5a              | 0.558593719  | 0.754458044  | 0.445954377  | 0.160619888  |
| ENSDART00000098311 | KCNJ4              | -0.486217707 | -0.434414335 | -0.027097558 | 0.056787682  |
| ENSDART00000098361 | nmba               | -1.096273595 | -1.192632984 | -0.904325972 | -1.052265102 |
| ENSDART00000098424 | trib2              | -0.755876906 | -0.434835466 | -0.414057266 | -0.366344874 |
| ENSDART00000098545 | tmem150aa          | 0.458575321  | 0.166363456  | 0.137813682  | -0.033806431 |
| ENSDART00000098567 | CRAT (1 of many)   | -0.211452678 | -0.154808037 | -0.361957852 | -0.341818431 |
| ENSDART00000098571 | CD53               | 0.954510613  | 0.498572956  | 0.147686328  | -0.376083033 |
| ENSDART00000098575 | trim110            | -0.538539785 | -0.074004136 | -0.613819609 | -0.257802554 |
| ENSDART00000098590 | cyb561a3a          | 0.500971443  | 0.776880119  | 0.690384128  | 0.607288952  |
| ENSDART00000098616 | rwdd               | 0.47601582   | 0.122947158  | 0.180975352  | 0.051928757  |
| ENSDART00000098627 | pros1              | -0.136816155 | -0.05658809  | -0.154307635 | -0.425593287 |
| ENSDART00000098639 | cntn5              | -0.259764888 | -0.493723855 | -0.530432667 | -0.172558087 |
| ENSDART00000098643 | tomm5              | 0.01929525   | -0.165199909 | -0.247037767 | -0.265103531 |
| ENSDART00000098648 | gc2                | -0.195652835 | -0.378422178 | -0.402398473 | -0.153861921 |
| ENSDART00000098667 | camk2b1            | -0.575252799 | -0.701444666 | -0.414382214 | 0.077165391  |
| ENSDART00000098668 | abcc8b             | -0.217525237 | -0.529877646 | -0.409188595 | -0.288785069 |
| ENSDART00000098673 | ptx3a              | -0.211528365 | -0.387085724 | -0.417540192 | -0.397382448 |
| ENSDART00000098727 | svopa              | -0.499297278 | -0.394465259 | 0.04106692   | 0.031976449  |
| ENSDART00000098750 | pdlim5b            | 0.340621907  | 0.643165703  | 0.410131138  | 0.075261902  |
| ENSDART00000098840 | ralgps1            | -0.525377749 | -0.528705894 | -0.140236147 | 0.156796103  |
| ENSDART00000098859 | neurod6a           | -0.523659161 | -0.308368621 | 0.583701544  | 0.979244768  |
| ENSDART00000098970 | lin28a             | 3.476899763  | 1.864207832  | 0.92280153   | 0.893269961  |
| ENSDART00000098982 | h3f3b.1            | -0.123835393 | -0.18991532  | -0.279701511 | -0.152040805 |
| ENSDART00000099003 | plscr3b            | 0.864146968  | 0.903022775  | 0.644348755  | -0.059087289 |
| ENSDART00000099019 | tmem91             | -0.661722152 | -0.699132453 | -0.1920109   | -0.057277853 |
| ENSDART00000099049 |                    | -0.472159773 | -0.420532241 | -0.250637325 | -0.02437969  |
| ENSDART00000099056 | gpx4a              | -0.526913186 | -0.311025548 | -0.820323342 | -0.895800055 |
| ENSDART00000099089 | ggcx               | -0.059935848 | -0.149142859 | -0.333945915 | -0.254577798 |
| ENSDART00000099102 | sept5a             | 0.488119217  | 0.804836681  | 0.729175054  | 0.142689277  |
| ENSDART00000099138 | ncf2               | 0.590402106  | 0.352177279  | 0.071326562  | -0.071022128 |

|                    |                   |              |              |              |              |
|--------------------|-------------------|--------------|--------------|--------------|--------------|
| ENSDART00000099180 | elovl8a           | -0.351208319 | -0.254455279 | -0.702580214 | -0.196165774 |
| ENSDART00000099192 | htr5ab            | -0.290360215 | -0.577686019 | -0.280786496 | -0.015762839 |
| ENSDART00000099202 | igsf11            | -0.183727476 | -0.31314564  | -0.202768681 | -0.036422441 |
| ENSDART00000099208 | asph              | -0.288641006 | -0.271409423 | -0.460024196 | -0.387402543 |
| ENSDART00000099235 | rnf44             | -0.234703995 | -0.37643632  | -0.256248531 | 0.012942846  |
| ENSDART00000099244 | CDHR2             | -0.127835174 | -0.277679177 | -0.519160965 | -0.069385603 |
| ENSDART00000099248 | rabggtb           | 0.075526469  | 0.438084725  | 0.330428907  | 0.205346366  |
| ENSDART00000099283 | dalrd3            | -0.272196688 | -0.367831508 | -0.108158836 | 0.07067938   |
| ENSDART00000099325 | si:dkey-27p18.5   | -0.821017867 | -0.681399645 | -0.140207831 | 0.113491694  |
| ENSDART00000099389 | dnlz              | 0.363796601  | 0.422259676  | 0.108203262  | 0.027839921  |
| ENSDART00000099392 | irgq2             | -0.080759981 | -0.21229475  | -0.382096269 | -0.042741954 |
| ENSDART00000099476 | fam174b           | -0.249603276 | -0.126773683 | -0.376574062 | -0.35637543  |
| ENSDART00000099501 | masp1             | 0.656652704  | -0.018219479 | -0.317919643 | -0.733675787 |
| ENSDART00000099528 | spry4             | -1.005335524 | -0.789062042 | -0.760146662 | -1.480463024 |
| ENSDART00000099532 | vmhc              | -0.018141777 | 3.134710049  | 3.519069106  | 1.786644694  |
| ENSDART00000099566 | si:ch211-244o22.2 | 0.576141582  | 0.625409237  | 0.697152634  | 0.270183175  |
| ENSDART00000099568 | gpr137bb          | 0.063339268  | 0.018950684  | 0.393403815  | 0.411006     |
| ENSDART00000099607 | slc6a17           | -0.493487825 | -0.358976735 | -0.156955324 | 0.010739948  |
| ENSDART00000099690 | fam129ab          | 1.024572276  | 1.489725431  | 1.470862577  | 0.737761428  |
| ENSDART00000099764 | zgc:153031        | 0.216426658  | 0.538240257  | 0.500334626  | 0.476962119  |
| ENSDART00000099769 | ccdc22            | 0.325453994  | 0.346355629  | 0.367424682  | 0.130188245  |
| ENSDART00000099839 | map2k2b           | 4.411409189  | 4.089988152  | 4.160217635  | 3.732217772  |
| ENSDART00000099849 | arntl2            | 0.982355145  | 1.78511579   | 1.609893892  | 1.255639962  |
| ENSDART00000099869 | slc17a7b          | -0.359089552 | -0.531552161 | -0.360552754 | 0.022409885  |
| ENSDART00000099872 | slc17a6b          | -0.645728405 | -0.242319052 | 0.108083805  | 0.273480994  |
| ENSDART00000099891 | atp5ib            | -0.202173954 | -0.194749139 | -0.288932188 | -0.060278853 |
| ENSDART00000099934 | kcnc1a            | -0.987934197 | -1.510396524 | -0.387995788 | 0.170469595  |
| ENSDART00000099947 | samsn1a           | 0.989297054  | 0.26224771   | 0.078735734  | -0.489522484 |
| ENSDART00000099977 | mex3c             | 0.161233198  | 0.169039948  | 0.509657606  | 0.094152947  |
| ENSDART00000099978 | pdlim4            | 0.618309518  | 0.542997573  | 0.115667653  | -0.045450127 |
| ENSDART00000099994 | hspa8             | 0.258700063  | 0.242999424  | 0.401354403  | 0.332565903  |
| ENSDART00000100000 | gabra1            | -0.401815194 | -0.497271272 | -0.174154846 | 0.00256896   |
| ENSDART00000100022 | H2AFX (1 of many) | -0.512580891 | -0.39296931  | -0.220510282 | -0.111022185 |
| ENSDART00000100074 | pbx3a             | -0.314908702 | -0.751877287 | -0.359257757 | -0.077459645 |
| ENSDART00000100103 | acss2l            | -0.342716857 | -0.308956489 | -0.115247207 | 0.030743328  |
| ENSDART00000100110 | pak6b             | -0.707774149 | -0.488636508 | 0.157100943  | -0.07651745  |
| ENSDART00000100117 | znf143b           | -4.095841085 | -0.108331644 | -1.7298033   | -2.907687665 |
| ENSDART00000100131 | si:ch211-242e8.1  | 0.043404066  | -0.450710823 | -0.466087638 | 0.073034701  |
| ENSDART00000100145 | lgals9l1          | 1.730493466  | 0.73620688   | 0.17444521   | -0.331961456 |
| ENSDART00000100156 | agpat4            | 1.221504112  | 1.6039826    | 1.49974957   | 0.799345848  |
| ENSDART00000100181 | sall3b            | -0.170454734 | -0.209016072 | -0.285639823 | -0.232809645 |
| ENSDART00000100194 | msi2b             | -0.174290948 | -0.286012891 | -0.448717518 | -0.171818835 |
| ENSDART00000100223 | zgc:91860         | -0.412727201 | -0.311203152 | -0.280203316 | -0.243367869 |
| ENSDART00000100234 | col2a1a           | -0.262380123 | -0.070947069 | -0.203936285 | -0.943179815 |
| ENSDART00000100241 | haao              | -0.290824489 | -0.384992406 | -0.679902583 | -0.875375738 |
| ENSDART00000100286 | fgfr4             | -0.349487842 | -0.279142199 | -0.557520873 | -0.83628708  |
| ENSDART00000100287 | grk7a             | -0.29429259  | -0.34179807  | -0.766271921 | -0.26689268  |
| ENSDART00000100290 | napbb             | -0.403034353 | -0.312472409 | -0.341096083 | -0.127811116 |
| ENSDART00000100310 | dbn1              | 0.014767176  | 0.221674025  | 0.550020524  | 0.324902581  |
| ENSDART00000100320 | dnmt3aa           | -0.203167185 | -0.31036097  | -0.115665251 | -0.0614106   |
| ENSDART00000100322 | kcnh5b            | -0.532935362 | -0.444322241 | -0.174846578 | 0.219995697  |

|                    |                  |              |              |              |              |
|--------------------|------------------|--------------|--------------|--------------|--------------|
| ENSDART00000100327 | nptx1l           | -0.348659958 | -0.433920996 | -0.393251042 | -0.286427391 |
| ENSDART00000100332 | fgf12b           | -0.220479512 | 0.029676005  | 0.518232207  | 0.657400596  |
| ENSDART00000100386 | mstnb            | -0.232479836 | -0.19741782  | -0.546065599 | -0.487217319 |
| ENSDART00000100401 | aars             | 0.036948074  | 0.225050642  | 0.3787132    | 0.301138312  |
| ENSDART00000100415 | map3k7cl         | 1.690116609  | 2.517738065  | 2.168584787  | 1.392466275  |
| ENSDART00000100438 | rab38b           | 0.552254991  | 0.331427199  | 0.26198981   | -0.020729573 |
| ENSDART00000100444 | fam19a5a         | -0.63242802  | -0.536601669 | -0.265992198 | 0.12320759   |
| ENSDART00000100453 | cerk             | -0.133196976 | -0.125062952 | -0.291644205 | -0.1718331   |
| ENSDART00000100458 | si:dkey-73n10.1  | 1.648347098  | 0.766263068  | 0.204715566  | -0.361349683 |
| ENSDART00000100473 | PLIN3            | 1.275027857  | 0.887739595  | 0.535269477  | -0.111777778 |
| ENSDART00000100596 | pcdh1a6          | -0.483816366 | -0.257584823 | -0.06041051  | 0.00168094   |
| ENSDART00000100605 | ttc32            | -0.362267617 | -0.196641209 | -0.477779827 | -0.443477008 |
| ENSDART00000100619 | zgc:158803       | 0.343521186  | 0.388812734  | 0.518620429  | 0.45576524   |
| ENSDART00000100622 | slc15a2          | 1.330001469  | 0.871350782  | 0.119367987  | -0.187130808 |
| ENSDART00000100639 | chrn4a           | -0.541979173 | -0.464947812 | -0.239039654 | -0.216630506 |
| ENSDART00000100658 | esrra            | -0.571475474 | -0.395296451 | 0.169003635  | 0.212368184  |
| ENSDART00000100667 | skia             | -0.180939747 | -0.108825609 | -0.328725059 | -0.076853639 |
| ENSDART00000100681 | ncam2            | -0.42007768  | -0.748629002 | -0.327699832 | -0.08364547  |
| ENSDART00000100743 | cttnbp2          | -0.40355339  | -0.391763552 | 0.009167842  | 0.081098     |
| ENSDART00000100762 | inpp4ab          | -0.155677368 | -0.41981961  | -0.539565797 | -0.358079101 |
| ENSDART00000100798 | trip6            | -0.01587524  | -0.010041711 | 0.309937262  | 0.254192292  |
| ENSDART00000100813 | rps24            | 0.369574152  | 0.327820695  | 0.143165091  | -0.049601165 |
| ENSDART00000100869 | ppp3r1b          | -0.102347685 | -0.214447853 | -0.31663745  | -0.211814655 |
| ENSDART00000100877 | zgc:153142       | -0.183846915 | -0.253996232 | -0.437661908 | -0.081274008 |
| ENSDART00000100885 | nrn1la           | -0.520024314 | -0.30927413  | -0.690569972 | -0.461401545 |
| ENSDART00000100898 | tnfsf12          | 0.387181383  | 0.213965186  | 0.122654268  | 0.108692776  |
| ENSDART00000101014 | cx32.2           | 1.233652332  | 0.399790197  | -0.050586016 | -0.568712262 |
| ENSDART00000101037 | nhp2             | 0.465910387  | 0.391566586  | 0.240162003  | -0.008355829 |
| ENSDART00000101038 | tmie             | 0.304653896  | 1.158765103  | 1.299122704  | 1.103412502  |
| ENSDART00000101044 | hsbp1a           | 0.110662102  | 0.30138061   | 0.346862926  | 0.268898796  |
| ENSDART00000101070 | dachd            | -0.296270747 | -0.351582482 | -0.130791564 | -0.009393292 |
| ENSDART00000101097 | acp6             | 0.210112925  | 0.333975464  | 0.275264967  | 0.086639765  |
| ENSDART00000101124 | rnaseka          | 1.077486687  | 0.59165486   | 0.038549521  | -0.354475184 |
| ENSDART00000101134 | khdrbs2          | -0.661640499 | -0.469301828 | -0.265343985 | -0.029039929 |
| ENSDART00000101142 | chsy3            | 0.236575675  | 0.054760791  | -0.253204551 | -0.378519013 |
| ENSDART00000101143 | mhc1zea          | 0.57323499   | 0.526487775  | 0.424884066  | 0.07882824   |
| ENSDART00000101204 | alcamb           | 1.334306533  | 2.490758317  | 2.513428399  | 1.826617796  |
| ENSDART00000101208 | abhd11           | -0.157962098 | -0.321289806 | -0.312791151 | -0.149912405 |
| ENSDART00000101219 | mettl27          | 0.439044633  | 0.662527528  | 0.547984428  | 0.178832583  |
| ENSDART00000101231 | syt7b            | -0.85705254  | -2.266705376 | -0.529986528 | 0.010282974  |
| ENSDART00000101265 | pik3c3           | 0.317460591  | 0.079259824  | 0.186108571  | 0.079398024  |
| ENSDART00000101282 | bcr              | 0.172989029  | 0.500540591  | 0.708792261  | 0.385177654  |
| ENSDART00000101292 | si:dkey-238c7.16 | 0.35472996   | 0.602144814  | 0.450575535  | -0.163119012 |
| ENSDART00000101319 | zgc:162396       | 0.344606585  | 0.405244483  | 0.227818995  | 0.060602938  |
| ENSDART00000101394 |                  | -0.473756662 | -0.114672377 | -0.629243212 | -2.05184474  |
| ENSDART00000101477 | emp1             | -0.241905322 | -0.037268798 | 0.203715295  | 0.377786296  |
| ENSDART00000101513 | ppp6r2b          | -0.18278033  | -0.275899098 | -0.242929069 | -0.103103109 |
| ENSDART00000101530 |                  | -0.360327211 | -0.388582556 | -0.376333338 | -0.16940017  |
| ENSDART00000101537 | mex3b            | -0.20648165  | 0.480244705  | 0.713185315  | 0.514833911  |
| ENSDART00000101576 | tmem230b         | 0.001436175  | -0.176978383 | -0.445323711 | -0.253116022 |
| ENSDART00000101577 | lrrfip1a         | 0.656945169  | 0.402220137  | -0.125928686 | -0.548022342 |

|                    |                   |              |              |              |              |
|--------------------|-------------------|--------------|--------------|--------------|--------------|
| ENSDART00000101603 | kidins220b        | -0.01985848  | -0.087358266 | 0.173253678  | 0.374974923  |
| ENSDART00000101627 | IGLON5            | -0.423175903 | -0.742308046 | -0.313681293 | 0.102626627  |
| ENSDART00000101631 | satb1b            | -0.360112936 | -0.384116906 | 0.134197196  | 0.481946288  |
| ENSDART00000101653 | CU639469.1        | -0.529716959 | -0.505372118 | -0.050085906 | 0.195515782  |
| ENSDART00000101658 | ppp1r1b           | -0.639757199 | -0.267805539 | -0.098160681 | -0.228099263 |
| ENSDART00000101698 | rpz3              | 0.288382306  | 0.347423497  | 0.479161923  | 0.327971533  |
| ENSDART00000101707 | dhx40             | 1.733776583  | 1.072360854  | 0.976040329  | 1.006521884  |
| ENSDART00000101789 | flot2b            | 0.047673595  | 0.464453756  | 0.590584487  | 0.461504068  |
| ENSDART00000101943 | rragca            | 0.302260739  | 0.264945177  | 0.40523597   | 0.261316897  |
| ENSDART00000101948 | GJA9 (1 of many)  | -0.638779519 | -0.432316335 | -0.423080448 | -0.46097286  |
| ENSDART00000101974 | erh               | 0.03890153   | -0.044950443 | -0.279975387 | -0.23272597  |
| ENSDART00000101982 | irg1              | 0.318182673  | 0.173060394  | -0.011525449 | -0.063563032 |
| ENSDART00000101985 | zgc:162944        | 0.341402057  | 0.426793325  | 0.183161821  | -0.332319729 |
| ENSDART00000102011 | G3BP2 (1 of many) | 0.183053703  | 0.292940696  | 0.414353657  | 0.391197687  |
| ENSDART00000102062 | timp2b            | 0.538603085  | 0.084002119  | -0.039686845 | -0.313946909 |
| ENSDART00000102075 | rxrba             | -5.032133145 | -2.347844506 | -3.410287183 | -0.630106553 |
| ENSDART00000102111 | tpt1              | 0.26125953   | 0.357793849  | 0.090393072  | -0.094022362 |
| ENSDART00000102125 | schip1            | -0.065634739 | -0.008431238 | -0.356995513 | -0.237294266 |
| ENSDART00000102148 | ddx3b             | -0.056845376 | -0.031755759 | 0.246518412  | 0.169198996  |
| ENSDART00000102212 | tdp2a             | 1.019634105  | 0.831370615  | 2.830207945  | 0.310574015  |
| ENSDART00000102214 | ndufv3            | -0.094484605 | -0.143659913 | -0.265916135 | -0.00411612  |
| ENSDART00000102260 | si:dkey-222f8.3   | 0.869989363  | 1.191058069  | 0.864781519  | 0.175715859  |
| ENSDART00000102279 | lingo2b           | -0.319370755 | 0.274609796  | 0.545692974  | 0.078594547  |
| ENSDART00000102305 | cspg5a            | -0.238742988 | 0.181941504  | 0.751580581  | 0.677972326  |
| ENSDART00000102368 | grin1a            | -0.57807298  | -0.694484674 | -0.374619925 | 0.025284051  |
| ENSDART00000102384 | sesn2             | 0.221656214  | 0.707312613  | 0.831938385  | 0.650662976  |
| ENSDART00000102411 | dctn1b            | 0.519457248  | 0.529061234  | 0.697567556  | 0.548863629  |
| ENSDART00000102419 | igf2bp2a          | 0.598022036  | 0.736011973  | 0.87621145   | 0.419702221  |
| ENSDART00000102431 | CU571081.1        | 0.38462754   | 0.22357069   | 0.170924196  | -0.045496543 |
| ENSDART00000102434 | ehhadh            | 0.70922182   | 0.453174195  | 0.063745289  | -0.562849237 |
| ENSDART00000102445 | clasp1a           | -0.444419251 | -0.511465397 | -0.218813787 | -0.372606163 |
| ENSDART00000102455 | gucy1a3           | -0.52073984  | -0.506169014 | -0.27571082  | 0.101070807  |
| ENSDART00000102459 | rbp2a             | 3.492314469  | 2.902874566  | 1.90821276   | 1.340524369  |
| ENSDART00000102461 | rgs8              | -0.536939066 | -0.575929959 | -0.463779418 | -0.057720257 |
| ENSDART00000102520 | palm1a            | 0.447081887  | 0.96607967   | 1.214937327  | 0.924772733  |
| ENSDART00000102539 | st8sia5           | 0.153973405  | 0.592846857  | 1.061043515  | 0.777183018  |
| ENSDART00000102559 | zgc:122979        | -0.659472503 | -0.379774871 | -0.282725672 | -0.191125017 |
| ENSDART00000102562 | ankrd10b          | -0.585231519 | -0.124121182 | 0.139197554  | 0.179030577  |
| ENSDART00000102567 | si:ch211-1o7.3    | 0.865836952  | 0.255817573  | 0.19284358   | -0.410198985 |
| ENSDART00000102665 | aste1a            | 0.478587949  | 0.328068557  | 2.324198666  | 0.218780766  |
| ENSDART00000102672 | nck2a             | 0.205356684  | 0.423877669  | 0.371996615  | 0.147611944  |
| ENSDART00000102681 | pnp5a             | 0.202802193  | 0.499095293  | 0.029150263  | -0.463436134 |
| ENSDART00000102712 | tgm2a             | 0.064390317  | 0.421175856  | 0.197637738  | 0.730671181  |
| ENSDART00000102715 | tuba8l3           | 1.032352614  | 1.505768874  | 1.918452626  | 1.697934809  |
| ENSDART00000102767 | fbxo9             | -0.10612083  | -0.188227567 | -0.252741487 | -0.179227033 |
| ENSDART00000102782 | gria2a            | -0.472482927 | -0.595061919 | -0.203521695 | 0.050111807  |
| ENSDART00000102788 | epha7             | -0.240787156 | -0.359871475 | -0.404301639 | -0.038479801 |
| ENSDART00000102790 | glrba             | -0.477875363 | -0.33299196  | -0.36632817  | -0.172063586 |
| ENSDART00000102791 | klhl31            | 1.919909064  | 3.64974722   | 3.354681727  | 2.995697572  |
| ENSDART00000102843 | src               | 0.333102086  | 0.263030754  | 0.362117443  | 0.2047457    |
| ENSDART00000102846 | si:dkey-23a23.2   | 0.194667046  | 0.692432605  | 0.589344711  | 0.460081053  |

|                    |            |              |              |              |              |
|--------------------|------------|--------------|--------------|--------------|--------------|
| ENSDART00000102868 | etnk2      | -0.119773861 | 0.158574082  | 0.41890552   | 0.249052751  |
| ENSDART00000102881 | fam43b     | -0.413239873 | -0.283572592 | -0.358392622 | -0.273570929 |
| ENSDART00000102898 | zgc:158258 | -0.205000336 | -0.263168834 | -0.54350319  | -0.257007642 |
| ENSDART00000102903 | dmd        | -0.080183076 | -0.276170831 | -0.483186786 | -0.073725636 |
| ENSDART00000102913 | cyp2v1     | 0.603838095  | 0.398439801  | -0.002186897 | -0.384510352 |
| ENSDART00000102952 | suz12a     | 0.614499433  | 0.610664915  | 0.72051821   | 0.430761521  |
| ENSDART00000102969 | spock3     | -0.0552616   | -0.214726057 | -0.592493725 | -0.285702337 |
| ENSDART00000102981 | col8a1a    | 1.700212586  | 0.444548046  | 0.772515926  | 0.395334934  |
| ENSDART00000103016 | zgc:173552 | 1.605722523  | 1.309975449  | 1.476680982  | 1.096088035  |
| ENSDART00000103043 | nsfa       | -0.472055845 | -0.418381067 | -0.313792962 | -0.037512478 |
| ENSDART00000103070 | cdk17      | 0.018864851  | -0.23502559  | -0.366641807 | -0.137520544 |
| ENSDART00000103076 | arl8bb     | 0.705280948  | 0.466975375  | 0.584557674  | 0.096505859  |
| ENSDART00000103151 | dlgap3     | -0.304185948 | -0.430889474 | -0.103996234 | 0.188728565  |
| ENSDART00000103267 | fam212ab   | -0.276107898 | -0.473876533 | -0.614056911 | -0.421775209 |
| ENSDART00000103293 | ndufa5     | -0.136898371 | -0.38263765  | -0.527827076 | -0.351287298 |
| ENSDART00000103352 | vps18      | 0.165861852  | 0.202619769  | 0.265495404  | 0.159870348  |
| ENSDART00000103365 | ociad1     | -0.01475249  | -0.099734574 | -0.308153486 | -0.083780451 |
| ENSDART00000103368 | rpl22      | 0.33350855   | 0.471741899  | 0.142215466  | -0.053336675 |
| ENSDART00000103385 | slc25a22   | -0.5158616   | -0.319809073 | -0.784039688 | -0.881615638 |
| ENSDART00000103405 | gch1       | -0.102362632 | -0.124839141 | -0.313487955 | 0.056848423  |
| ENSDART00000103407 | tmem245    | -0.353429601 | -0.331655767 | -0.089201446 | 0.066435984  |
| ENSDART00000103448 | tbx18      | 1.78643571   | 2.579858492  | 2.64743129   | 1.939376924  |
| ENSDART00000103450 | lactbl1b   | -0.310148031 | -0.346227281 | -0.611014657 | -0.245438949 |
| ENSDART00000103463 | dnajc2     | 0.193851448  | 0.30912042   | 0.441518195  | 0.223806707  |
| ENSDART00000103467 | zgc:77650  | 0.216349316  | 0.315934081  | 0.173077104  | -0.055613825 |
| ENSDART00000103471 | khdrbs1b   | -0.296913345 | -0.271356827 | -0.067247312 | 0.118087564  |
| ENSDART00000103474 | tspan13b   | -0.348967086 | -0.119531637 | 0.084177739  | 0.198302304  |
| ENSDART00000103487 | zgc:195001 | -0.335765581 | -0.344851478 | -0.707965666 | -0.31393888  |
| ENSDART00000103491 | rbp7b      | 2.051254968  | 1.285649693  | 0.558375641  | -0.074104197 |
| ENSDART00000103526 | bicc1b     | 0.362058268  | 0.640014631  | 0.968410254  | 0.365236005  |
| ENSDART00000103532 | kcnh5a     | -0.481841968 | -0.667651405 | -0.403869416 | -0.116032422 |
| ENSDART00000103549 | skib       | -0.170611371 | -0.408422527 | -0.193614247 | -0.134954723 |
| ENSDART00000103586 | hdac9b     | -0.63802499  | -0.480501706 | -0.6152094   | -0.590506452 |
| ENSDART00000103588 | mxs        | 0.174383297  | -0.012993595 | 1.447594397  | 0.019311963  |
| ENSDART00000103602 | lgals2a    | 1.886236295  | 1.628346862  | 1.325259297  | 0.487532368  |
| ENSDART00000103622 | irf7       | -0.049332142 | -0.2878598   | 1.533925917  | -0.275107455 |
| ENSDART00000103626 | mief2      | -0.089955279 | -0.188542146 | -0.285241779 | -0.158709862 |
| ENSDART00000103628 | btbd6a     | -0.278201553 | -0.439382236 | -0.547351526 | -0.157769223 |
| ENSDART00000103639 | arf3a      | 0.291954045  | 0.68170241   | 0.689772164  | 0.341898272  |
| ENSDART00000103640 | hey1       | -0.385659584 | -0.747117397 | -0.392306381 | -0.416692063 |
| ENSDART00000103646 | kcng2      | -0.538883844 | -0.646084515 | -0.39646557  | 0.008271529  |
| ENSDART00000103660 | clcn7      | 0.412276024  | 0.162279088  | -0.074638152 | -0.273644307 |
| ENSDART00000103704 | nap1l4a    | 0.303924114  | 0.290352176  | 0.138900988  | 0.027879829  |
| ENSDART00000103750 | fam131bb   | -0.555314971 | -0.519589863 | -0.143114917 | 0.156539518  |
| ENSDART00000103753 | fn1a       | 2.705855593  | 3.095500526  | 2.8206804    | 2.414837328  |
| ENSDART00000103754 | fn1b       | 2.49600075   | 3.130597747  | 1.885882871  | -0.148711913 |
| ENSDART00000103755 | fn1b       | 4.126396153  | 4.640072685  | 4.590004259  | 2.904538972  |
| ENSDART00000103785 | ggact.3    | -1.209900002 | -0.367470534 | -1.050388105 | -0.531293993 |
| ENSDART00000103795 | ggact.1    | 0.007439004  | -0.050660849 | -0.406911538 | -0.573615848 |
| ENSDART00000103815 | stmn2a     | 0.140137036  | 1.176009379  | 1.538144395  | 1.355356024  |
| ENSDART00000103831 | ano10b     | 0.06580331   | 0.43549934   | 0.640553067  | 0.460128123  |

|                    |                 |              |              |              |              |
|--------------------|-----------------|--------------|--------------|--------------|--------------|
| ENSDART00000103878 | vhl             | -0.19558438  | -0.426476861 | -0.33011461  | -0.126927905 |
| ENSDART00000103894 | cacng8b         | -0.589374624 | -0.680390231 | -0.379441318 | -0.105621743 |
| ENSDART00000103911 | CABZ01077217.1  | 0.385992878  | 0.554652123  | 0.464993777  | 0.2375762    |
| ENSDART00000103922 | atat1           | 0.145026536  | 0.665460259  | 0.937418253  | 0.683690675  |
| ENSDART00000103940 | mgat1b          | -0.294073166 | -0.13896492  | -0.278393093 | -0.224242354 |
| ENSDART00000103957 | exoc3l1         | 0.634582138  | 1.052789014  | 1.334761372  | 0.478611156  |
| ENSDART00000103969 | magi1b          | -0.261202469 | -0.221356443 | 0.045512769  | 0.18273538   |
| ENSDART00000103980 | crip2           | -0.517107368 | -0.364195263 | -0.546778441 | -0.267901424 |
| ENSDART00000103982 | nfe2l1a         | 0.652859432  | 0.675562602  | 0.38648833   | -0.18398816  |
| ENSDART00000103992 | ttl13           | -0.156492299 | -0.149773154 | -0.299786209 | -0.201934967 |
| ENSDART00000104008 | dtncp1b         | -0.424284075 | -0.457257716 | -0.424822836 | -0.199214695 |
| ENSDART00000104009 | slc30a1b        | 0.469731317  | 0.847749615  | 0.68298124   | 0.247669117  |
| ENSDART00000104027 | rims3           | -0.345163808 | -0.70584123  | -0.314103014 | -0.01029762  |
| ENSDART00000104043 | dkk3b           | 0.124905707  | -0.440538945 | -0.566305744 | -1.06504734  |
| ENSDART00000104058 | ncalda          | 0.174416215  | 0.325917683  | 0.093263441  | -0.133323566 |
| ENSDART00000104135 | gabrs5          | -0.398056951 | -0.510180941 | 0.262181183  | 0.751061332  |
| ENSDART00000104140 | dyrk4           | 0.302696779  | -0.345665012 | -0.79115152  | 0.018427723  |
| ENSDART00000104188 | igsf21b         | -0.476667576 | -0.274511883 | -0.073843861 | 0.013583331  |
| ENSDART00000104234 | gid2b           | -0.226334837 | -0.451484904 | -0.506629051 | -0.204050045 |
| ENSDART00000104257 | lpin1           | -0.263973453 | -0.162876624 | -0.357103753 | -0.3626544   |
| ENSDART00000104279 | znf516          | -0.151066862 | -0.30868422  | -0.587761132 | -0.246031248 |
| ENSDART00000104289 | rab3ab          | -0.744433679 | -0.710299004 | -0.400971594 | -0.021261155 |
| ENSDART00000104293 | pex5la          | -0.678333589 | -0.710207201 | -0.577955484 | -0.480904778 |
| ENSDART00000104298 | ndufb5          | -0.141095269 | -0.212773777 | -0.353488244 | -0.122828248 |
| ENSDART00000104299 | cnp             | 0.814960421  | 1.713687269  | 2.20652149   | 1.77606709   |
| ENSDART00000104307 | eml1            | 0.215532654  | -0.343903678 | -0.604837308 | -0.271121591 |
| ENSDART00000104317 | klf7b           | 0.389436838  | 1.156291561  | 1.140404424  | 0.652703479  |
| ENSDART00000104322 | uchl3           | 0.256651569  | 0.374538377  | 0.322263704  | 0.147277389  |
| ENSDART00000104327 | vsx1            | -0.248525466 | -0.619641572 | -0.034766195 | -0.028538746 |
| ENSDART00000104336 | tnnc2           | 0.703924131  | 2.455705453  | 2.232729877  | 1.561721699  |
| ENSDART00000104338 | pitpnl          | 0.001600172  | 0.291216057  | 0.176136036  | 0.011592783  |
| ENSDART00000104353 | atp2b1b         | -0.132002912 | -0.283527357 | -0.37922998  | -0.020226682 |
| ENSDART00000104361 | si:dkey-56d12.4 | 0.671595911  | 0.775149092  | 0.509958528  | 0.270735073  |
| ENSDART00000104364 | rps15           | 0.338617661  | 0.309197703  | 0.255669723  | -0.012990535 |
| ENSDART00000104423 | rbbp9           | 0.243640055  | 0.525148359  | 0.333645697  | 0.149282905  |
| ENSDART00000104475 | tmsb4x          | 0.344214142  | 0.313013147  | 0.275125575  | 0.128255357  |
| ENSDART00000104478 | fxr1            | 0.018053797  | 0.098113697  | 0.377704225  | 0.105513892  |
| ENSDART00000104481 | slc17a7a        | -0.380361502 | -0.377656856 | -0.259723773 | -0.186490981 |
| ENSDART00000104487 | cox4i2          | 0.027176247  | -0.218042175 | -0.688187338 | -0.440124172 |
| ENSDART00000104496 | dusp6           | 0.185513151  | -0.01084107  | 0.164485744  | 0.322445555  |
| ENSDART00000104519 | stat3           | 0.6458865    | 0.459098575  | 0.438501049  | 0.201812376  |
| ENSDART00000104520 | cnbbp           | -0.203757271 | -0.252097684 | -0.248932139 | -0.261165322 |
| ENSDART00000104523 | arntl1b         | -0.158144123 | 0.59291526   | 1.113237486  | 0.52944604   |
| ENSDART00000104525 | kmt2a           | 0.050001667  | 0.172870774  | 0.277996699  | 0.044684436  |
| ENSDART00000104536 | chsy1           | 0.021777196  | -0.175630111 | -0.644756219 | -0.079001152 |
| ENSDART00000104545 | avpr2ab         | -0.127228111 | -0.325246207 | -0.456539735 | -1.288721053 |
| ENSDART00000104576 | psmd13          | 0.182320821  | 0.32294371   | 0.367344771  | 0.118433419  |
| ENSDART00000104592 | pm20d1.2        | -0.022497234 | -0.114097556 | -0.391118153 | -0.365853437 |
| ENSDART00000104612 | hmx3a           | -0.260599707 | -0.468562174 | -0.112652566 | -0.078307838 |
| ENSDART00000104616 | lepr            | 0.762949533  | 0.720319043  | 0.625239528  | 0.526452567  |
| ENSDART00000104637 | si:ch211-81a5.8 | 0.707959832  | 0.064083353  | -0.292232881 | -0.006669302 |

|                    |                    |              |              |              |              |
|--------------------|--------------------|--------------|--------------|--------------|--------------|
| ENSDART00000104657 | mrps21             | -0.148781558 | -0.231390216 | -0.424136936 | -0.351598574 |
| ENSDART00000104673 | camk1gb            | -0.378218392 | -0.417447419 | 0.009394779  | -0.088307876 |
| ENSDART00000104674 | camk1db            | -0.318172003 | -0.339895825 | -0.49572727  | -0.229789777 |
| ENSDART00000104687 | pfn2               | 0.330558178  | 0.38737784   | 0.240819292  | -0.058450663 |
| ENSDART00000104708 | abhd12             | -0.134054463 | -0.304895231 | -0.501902497 | -0.262631127 |
| ENSDART00000104712 | hmg20a             | 0.003064442  | 0.120221197  | 0.366113134  | 0.275609671  |
| ENSDART00000104720 | si:ch1073-385f13.3 | 0.258133799  | 0.237616235  | 1.745458762  | -0.119672944 |
| ENSDART00000104722 | cdk5r2a            | -0.371112934 | -0.317321269 | -0.137896092 | -0.229143186 |
| ENSDART00000104728 | ssuh2.2            | 0.252481495  | 0.103488209  | 1.66757315   | -0.204612589 |
| ENSDART00000104730 | ifit14             | 0.457651023  | 0.403391968  | 2.518119653  | 0.537556431  |
| ENSDART00000104750 | mllt11             | -0.266364682 | 0.400357279  | 0.342752209  | 0.193353613  |
| ENSDART00000104751 | mxi1               | -0.384587031 | -0.210909301 | 0.22179917   | 0.104111801  |
| ENSDART00000104791 | zgc:153722         | 0.356828804  | 0.479757966  | 0.536710875  | 0.133740974  |
| ENSDART00000104828 | gtpbp2b            | -0.421398738 | -0.385176207 | -0.273058228 | -0.083654585 |
| ENSDART00000104835 | hps5               | 0.972059444  | 0.583168765  | 0.57443346   | -0.161192354 |
| ENSDART00000104845 | tapbp.1            | 3.172722647  | 3.246630579  | 3.542395564  | 2.955685304  |
| ENSDART00000104866 | ldhbb              | -0.207883318 | -0.435615938 | -0.519651289 | -0.183614515 |
| ENSDART00000104895 | rgs7a              | -0.76773786  | -0.54211529  | -0.053731925 | 0.298916153  |
| ENSDART00000104933 | eepd1              | -0.181346781 | -0.362247495 | -0.01782264  | 0.011720383  |
| ENSDART00000104950 | atp1a3a            | -0.469887861 | -0.514207298 | -0.064097938 | 0.181102676  |
| ENSDART00000104999 | ccdc85ca           | -0.136040811 | -0.297438948 | -0.211938794 | -0.169428565 |
| ENSDART00000105120 | tmem170b           | -0.08312029  | 0.138452609  | 0.437118287  | 0.263377377  |
| ENSDART00000105174 | stm                | 3.414215545  | 0.041843024  | -0.026881567 | -0.531574221 |
| ENSDART00000105179 | zgc:158254         | -0.229665852 | -0.301892648 | -0.223905123 | -0.049497491 |
| ENSDART00000105215 | emilin1b           | 1.074845253  | 1.078203948  | 0.684747395  | -0.035555204 |
| ENSDART00000105323 | zgc:162255         | -0.250927131 | -0.470845634 | -0.44137647  | -0.557741796 |
| ENSDART00000105399 | cbarpb             | 0.427437854  | 0.525694666  | 0.646908744  | 0.015511077  |
| ENSDART00000105404 | cirbpb             | 0.178847577  | 0.103859165  | 0.267594995  | 0.007629823  |
| ENSDART00000105405 | cirbpb             | 0.001082658  | 0.185977938  | 0.46521688   | -0.018730312 |
| ENSDART00000105477 | lrrtm2             | -0.540265042 | -0.543880814 | -0.470126158 | -0.070951006 |
| ENSDART00000105484 | si:ch211-216b21.2  | -0.960990997 | -0.619204359 | -0.135410073 | 0.236742995  |
| ENSDART00000105485 | si:dkey-78l4.14    | -0.103336903 | -0.24562657  | -0.381336593 | -0.194197896 |
| ENSDART00000105503 | rab3gap2           | 2.422276289  | 3.562211475  | 1.182834682  | 2.012188356  |
| ENSDART00000105545 | arl3               | -0.028403306 | -0.158533169 | -0.38830015  | -0.193573844 |
| ENSDART00000105561 | si:dkey-42p8.3     | -0.126414242 | -0.359710173 | -0.388006213 | -0.105772793 |
| ENSDART00000105588 | pcdh1b             | -0.246217756 | -0.446101289 | -0.039720059 | 0.09005245   |
| ENSDART00000105597 | si:ch211-129c21.1  | 3.291282195  | 4.994402871  | 3.669154828  | 0.685912998  |
| ENSDART00000105602 | elovl6             | -0.283618771 | -0.171237628 | -0.388002017 | -0.174233768 |
| ENSDART00000105608 | prkcea             | -0.17407648  | -0.282581987 | -0.238186172 | -0.104981942 |
| ENSDART00000105659 | mhc1zja            | 0.668521736  | 0.771454181  | 0.462558446  | 0.066622239  |
| ENSDART00000105667 | si:dkey-121a11.3   | -0.369671493 | -0.58967553  | -0.842073302 | -0.52980672  |
| ENSDART00000105681 | cdc14ab            | -0.104501589 | -0.239167071 | -0.39502699  | -0.259112662 |
| ENSDART00000105694 | adprm              | 0.302167589  | 0.521514455  | 0.908630272  | 0.271324554  |
| ENSDART00000105743 | ntng1a             | -0.262343031 | -0.343435025 | -0.06227485  | 0.248931143  |
| ENSDART00000105749 | nrros              | 0.925801893  | 0.55337814   | 0.265308462  | -0.351361566 |
| ENSDART00000105753 | olfm3a             | -0.365975807 | -0.465135675 | -0.139223772 | 0.043379292  |
| ENSDART00000105767 | fh1a               | 0.562168934  | 1.496722819  | 1.339494009  | 0.93265064   |
| ENSDART00000105774 | ek1                | -0.422572147 | -0.621215995 | -0.219935537 | -0.023014864 |
| ENSDART00000105813 | krt222             | -0.522679169 | -0.470823148 | -0.650543043 | -0.842913393 |
| ENSDART00000105818 | guk1a              | 0.053300944  | 0.162526517  | 0.245626369  | 0.043825221  |
| ENSDART00000105848 | si:dkey-42i9.7     | 0.176745483  | 0.033035183  | 1.603344014  | -0.243326761 |



|                    |                     |              |              |              |              |
|--------------------|---------------------|--------------|--------------|--------------|--------------|
| ENSDART00000105854 | josd1               | -0.238139004 | 0.044983845  | 0.263174427  | 0.210087455  |
| ENSDART00000105866 | si:ch73-213k20.5    | -0.515754761 | -0.874847543 | -0.892891327 | -0.392973916 |
| ENSDART00000105873 | cry4                | -0.404336974 | 0.122755184  | 0.671823255  | 0.515326773  |
| ENSDART00000105878 | fbli1               | 1.656130522  | 1.752691305  | 1.013125802  | 0.616877976  |
| ENSDART00000105896 | atp2a1l             | -1.028985284 | 2.5381413    | 3.515981153  | 2.247616466  |
| ENSDART00000105898 | TSTD1               | 0.614724746  | 0.98570488   | 0.724640457  | 0.337367855  |
| ENSDART00000105903 | lsm5                | 0.135971292  | -0.078983757 | -0.333257253 | -0.331997667 |
| ENSDART00000105932 | si:dkeyp-110e4.11   | -0.775118699 | -0.662012678 | -0.111191342 | 0.348802036  |
| ENSDART00000105942 | si:dkey-253d23.3    | 0.99314399   | 1.287434296  | 0.804068321  | 0.742353386  |
| ENSDART00000105967 | cacna2d1a           | -0.039509635 | -0.246396203 | -0.304011671 | -0.176720638 |
| ENSDART00000105974 | pvalb9              | -0.398960737 | -0.428084025 | -0.618672138 | -0.278532192 |
| ENSDART00000105988 | si:ch211-156p11.1   | 0.766312966  | 0.897687307  | 0.740122106  | 0.441957966  |
| ENSDART00000106048 | ctnnd1              | 0.632970644  | 0.745690204  | 0.779606908  | 0.274224061  |
| ENSDART00000106081 | BX511034.2          | 0.124750693  | 0.347355362  | 0.433795514  | 0.117013159  |
| ENSDART00000106096 | drd1a               | -0.279465728 | -0.508847304 | -0.2349577   | -0.295766526 |
| ENSDART00000106120 | ywhag2              | 0.097311782  | 0.334968358  | 0.584303472  | 0.612363287  |
| ENSDART00000106141 | tma7                | 0.110821999  | -0.104393908 | -0.337001227 | -0.221432499 |
| ENSDART00000106152 | top2a               | 1.478970046  | 0.796399019  | 1.005046229  | 0.716311641  |
| ENSDART00000106166 | rx1                 | -1.001905061 | -0.358282402 | 0.191592029  | -0.031411117 |
| ENSDART00000106172 | rac1a               | 0.326396929  | 0.503439113  | 0.328932342  | 0.053159748  |
| ENSDART00000106186 | prex2               | -0.375401587 | -0.276106515 | -0.274390577 | -0.295066887 |
| ENSDART00000106198 | zgc:66433           | 0.123524201  | -0.419463467 | -0.600279473 | -0.27606853  |
| ENSDART00000106229 | zgc:113886          | -1.108782489 | -3.592108749 | -0.501312332 | -0.527928714 |
| ENSDART00000106260 | ankha               | 0.083956215  | -0.292178887 | -0.396040739 | -0.042168676 |
| ENSDART00000106566 | CABZ01030107.1      | 2.449267078  | 1.581540517  | 1.3239843    | 0.803203173  |
| ENSDART00000106619 | nrn1a               | -1.225032386 | -1.272422646 | -0.361032349 | 0.032061464  |
| ENSDART00000106680 | rai1                | -0.196842736 | -0.463425257 | -0.402954237 | -0.12043583  |
| ENSDART00000106690 | pcdh2g7             | 0.533636914  | 0.291763532  | 0.532651571  | 0.481339584  |
| ENSDART00000106704 | pcdh2ab1            | -0.111727697 | 0.203588847  | 0.448801307  | 0.505664817  |
| ENSDART00000108471 | ipo7                | 0.142918554  | 0.150506384  | 0.285667017  | 0.157707046  |
| ENSDART00000108493 | gareml              | 2.608537205  | 3.376838547  | 3.284344596  | 2.814340641  |
| ENSDART00000108496 | clec11a             | -1.064574084 | -0.301046329 | -0.192981843 | -0.515534742 |
| ENSDART00000108507 | CSMD3               | -0.201722796 | -0.640032982 | -0.257154173 | 0.075603806  |
| ENSDART00000108535 | gabrb1              | -1.10767094  | -1.249599593 | -0.238929019 | 0.417524871  |
| ENSDART00000108574 | gramd1bb            | -0.232214076 | -0.405839915 | -0.354417408 | -0.144413075 |
| ENSDART00000108581 | si:dkey-17m8.1      | 0.789679514  | 0.574820222  | 0.300394764  | -0.045841382 |
| ENSDART00000108596 | zgc:162150          | 0.993292495  | 1.420859127  | 1.257973066  | 0.026357222  |
| ENSDART00000108629 | lrch1               | -0.183622444 | -0.188824595 | -0.180380725 | -0.322184411 |
| ENSDART00000108655 | RHOBTB2 (1 of many) | -0.407905552 | -0.427681874 | -0.180479384 | -0.131684888 |
| ENSDART00000108729 | adamtsl2            | -0.842317462 | -0.70962753  | 0.040474933  | 0.841307736  |
| ENSDART00000108736 | adam12              | -0.319460786 | -0.316431452 | 0.445307645  | 0.87790832   |
| ENSDART00000108796 | stox2b              | 0.143615187  | 0.758742406  | 1.120462456  | 0.794663921  |
| ENSDART00000108804 | brinp1              | -0.191216427 | -0.292751478 | -0.180680558 | 0.046514423  |
| ENSDART00000108808 | frem2a              | -0.381822233 | -0.539670066 | 0.662155423  | 0.974116851  |
| ENSDART00000108814 | nrip2               | -0.213998541 | -0.302896779 | -0.276048404 | -0.173620142 |
| ENSDART00000108818 | arhgap32a           | -0.576365369 | -0.434660146 | -0.258610983 | 0.095307278  |
| ENSDART00000108831 | espnla              | 0.888146475  | 0.74973908   | 0.792131149  | 0.719500985  |
| ENSDART00000108916 | SIPA1               | -0.25031723  | -0.283192607 | 0.116871701  | 0.232178471  |
| ENSDART00000108928 | pnpla8              | -0.24833123  | -0.178721384 | -0.052341018 | -0.031698962 |
| ENSDART00000108943 | shroom2a            | 0.03299057   | -0.127271939 | -0.499446332 | -0.229050052 |
| ENSDART00000108959 | RNF208              | -0.615021133 | -0.757500788 | -0.372077015 | -0.309696014 |

|                    |                   |              |              |              |              |
|--------------------|-------------------|--------------|--------------|--------------|--------------|
| ENSDART00000108963 | CABZ01102109.1    | 0.394501993  | 0.771748701  | 0.296144389  | 0.075524582  |
| ENSDART00000108989 | adamts14          | -0.185318243 | -0.40325002  | -0.417840329 | -0.182643804 |
| ENSDART00000108990 | pex5lb            | -0.323313621 | -0.539021494 | -0.34249137  | -0.198103063 |
| ENSDART00000108995 | tex2              | 0.515345319  | 0.756490823  | 0.434164856  | 0.106684566  |
| ENSDART00000109014 | GJC1              | -0.38880893  | -0.552238053 | -0.31502822  | -0.300328618 |
| ENSDART00000109017 | usp31             | -0.203091269 | -0.25315355  | -0.034862909 | 0.058179546  |
| ENSDART00000109023 | fmnl3             | -0.186687955 | -0.312847961 | -0.533074314 | -0.280720309 |
| ENSDART00000109029 | map6a             | -0.330392405 | -0.354970167 | -0.034172445 | 0.05340091   |
| ENSDART00000109031 | gpr26             | -0.593199232 | -0.45461936  | -0.805315901 | -0.585023693 |
| ENSDART00000109037 | cdk5r2b           | -0.48847507  | -0.44246865  | -0.592226601 | -0.418268347 |
| ENSDART00000109040 | gpr158a           | -0.331785981 | -0.632662732 | -0.236983197 | 0.105308258  |
| ENSDART00000109044 | gm8a              | -0.470031444 | -0.746629562 | -0.459544685 | -0.031467357 |
| ENSDART00000109062 | nckap5l           | -0.29308537  | -0.083948409 | 0.248864543  | 0.105880197  |
| ENSDART00000109065 | ccng1             | 0.498527324  | 0.814436551  | 0.266438219  | -0.054038693 |
| ENSDART00000109070 | gigyf1b           | -0.072846918 | -0.184795854 | -0.274652224 | -0.080632892 |
| ENSDART00000109091 | mettl1            | 1.65076712   | 2.831574782  | 2.963448936  | 2.721211005  |
| ENSDART00000109099 | ttn.2             | -4.072510837 | 1.236801213  | 2.302382204  | 1.171450021  |
| ENSDART00000109124 | rspo2             | 0.077521406  | 0.271943255  | -0.228972258 | -0.854369599 |
| ENSDART00000109138 | hbegfa            | 0.956645779  | 1.991576979  | 1.27153829   | 0.330229075  |
| ENSDART00000109147 | brsk2b            | -0.075048445 | -0.279504807 | -0.192446814 | 0.052331491  |
| ENSDART00000109171 | rce1a             | -0.218282831 | -0.358569107 | -0.271597779 | -0.119151709 |
| ENSDART00000109224 | CCKBR (1 of many) | -0.56783642  | -0.51463677  | -0.498556224 | -0.286398879 |
| ENSDART00000109235 | bicd2             | 0.048329883  | -0.336297195 | -0.602745642 | -0.296802706 |
| ENSDART00000109243 | sema4bb           | -0.591195487 | -0.421350422 | -0.25044186  | -0.118505649 |
| ENSDART00000109249 | cenpo             | 3.029141821  | 1.947037559  | 2.256164745  | 0.98054484   |
| ENSDART00000109252 | nudt5             | 0.602324776  | 0.61383313   | 0.580277921  | 0.203918347  |
| ENSDART00000109257 | RASGRF1           | -0.570969407 | -0.754386918 | -0.426488142 | -0.098297531 |
| ENSDART00000109259 | smarcc1a          | 0.060519576  | 0.104503692  | 0.246223049  | 0.143325093  |
| ENSDART00000109288 | myo16             | 0.115485168  | 0.089369719  | 0.360073499  | 0.534996054  |
| ENSDART00000109308 | si:ch73-60h1.1    | -0.222101504 | -0.315217201 | -0.340339223 | -0.206722759 |
| ENSDART00000109314 | arhgap10          | -0.214061464 | -0.171864796 | -0.398074347 | -0.037252057 |
| ENSDART00000109319 | arf1              | 0.284053831  | 0.377774948  | 0.307132687  | 0.034662092  |
| ENSDART00000109356 | klf7a             | -0.7063233   | -0.659659661 | -0.044315321 | 0.157900055  |
| ENSDART00000109415 | blzf1             | -4.190621432 | -2.580757916 | 0.161069597  | -0.394790047 |
| ENSDART00000109416 | smc2              | 1.321753383  | 1.108242465  | 0.857262832  | 0.308883411  |
| ENSDART00000109420 | kcnip1b           | -0.712749849 | -0.701262469 | -0.816924162 | -0.561177799 |
| ENSDART00000109425 | nkf3              | 3.023582344  | 2.734865433  | 2.70294964   | 2.317338999  |
| ENSDART00000109432 | cercam            | 0.726258015  | 0.540687546  | 0.072936326  | -0.232601995 |
| ENSDART00000109440 | adamts9           | -0.162680626 | -0.21784206  | -0.326391297 | -0.145144869 |
| ENSDART00000109452 | sbfl              | -0.62469158  | -0.583723087 | 0.106179087  | 0.127879066  |
| ENSDART00000109464 | g0s2              | 2.993222235  | 1.499538045  | 0.588261277  | 0.527162957  |
| ENSDART00000109485 | gal3st3           | -0.139388785 | -0.282505485 | -0.388230748 | -0.163229068 |
| ENSDART00000109486 | gprc5ba           | -0.628238673 | -0.569388482 | -0.508289237 | -0.226450363 |
| ENSDART00000109497 | tbxas1            | 0.141369479  | -0.217979555 | -0.576549291 | -0.268338462 |
| ENSDART00000109507 | RAP1GDS1          | -0.399835735 | -0.351308804 | 0.076766568  | 0.119897865  |
| ENSDART00000109511 | si:ch211-186j3.6  | -0.164289524 | -0.357536961 | -0.081167433 | 0.02827477   |
| ENSDART00000109528 | adgre5b.3         | 0.525818313  | 0.538353042  | 0.246499359  | -0.175742704 |
| ENSDART00000109535 | gmpr              | 0.181071124  | 0.257853381  | 0.376587367  | 0.112990813  |
| ENSDART00000109537 | snphb             | -0.466057723 | -0.636087511 | -0.318006337 | -0.040021342 |
| ENSDART00000109546 | unc5b             | -0.076752071 | -0.101810869 | -0.423560106 | -0.292578205 |
| ENSDART00000109552 | baz2ba            | 0.627489244  | 0.525669422  | 0.712410774  | 0.393101067  |

|                    |                    |              |              |              |              |
|--------------------|--------------------|--------------|--------------|--------------|--------------|
| ENSDART00000109567 | nhsa               | -0.05015222  | -0.331046598 | -0.348641258 | -0.190382203 |
| ENSDART00000109568 | pip4k2ab           | -0.31785183  | -0.37156543  | -0.209120418 | 0.064881056  |
| ENSDART00000109570 |                    | -0.315520739 | -0.355339215 | -1.137398742 | -0.355379016 |
| ENSDART00000109573 | akap6              | 0.927127599  | 1.241947706  | 1.04133516   | 0.789730231  |
| ENSDART00000109581 | abtb1              | -0.353930406 | -0.557673054 | -0.197302182 | -0.044180273 |
| ENSDART00000109604 | palmdb             | -0.228743892 | -0.477529612 | -0.779896236 | -0.307691368 |
| ENSDART00000109615 | tmem255a           | 0.198392818  | 0.721353886  | 0.92551731   | 0.71998369   |
| ENSDART00000109698 | nacc1b             | -0.541808458 | -0.507646097 | -0.425509734 | -0.201090141 |
| ENSDART00000109714 | usp53b             | -0.259276756 | -0.08547014  | -0.255057866 | -0.127997302 |
| ENSDART00000109732 | amigo1             | -0.336374535 | -0.536025942 | -0.442802906 | -0.174075192 |
| ENSDART00000109750 | rap2aa             | 0.293487605  | 0.482823125  | 0.662590656  | 0.396980886  |
| ENSDART00000109752 | serpinh1a          | 0.578805227  | 0.380412306  | 0.080680913  | -0.569755212 |
| ENSDART00000109759 | tmx2a              | 2.647169883  | 3.21425121   | 2.659532867  | 1.569734674  |
| ENSDART00000109807 | EMILIN3            | 0.322021142  | 0.194240185  | 0.000409902  | -0.0946206   |
| ENSDART00000109822 | hps1               | 0.431913269  | 0.483030578  | 0.349219151  | -0.038818149 |
| ENSDART00000109831 | BX088653.1         | 0.96716269   | 0.47589947   | 0.338658984  | -0.013815104 |
| ENSDART00000109833 | zmat3              | -0.462380241 | -0.737159777 | -0.151865097 | 0.090633241  |
| ENSDART00000109853 | zmp:0000000801     | -0.4485216   | -0.462342097 | -0.503236916 | -0.960013508 |
| ENSDART00000109872 | cln6a              | 0.07921086   | -0.018544414 | -0.27320282  | -0.083540486 |
| ENSDART00000109876 | sun1               | -0.255190881 | -0.339472925 | -0.466317308 | -0.169389668 |
| ENSDART00000109973 | tp53bp1            | 0.061139928  | 0.539512942  | 0.657824217  | 0.222950524  |
| ENSDART00000109990 | abhd15a            | -0.466192052 | -0.318128979 | -0.316342009 | -0.301397533 |
| ENSDART00000110004 | frmpd3             | -0.530320903 | -0.511652794 | -0.387982186 | 0.071931622  |
| ENSDART00000110005 | cdhr1a             | -0.099288941 | -0.157780229 | -0.305559135 | -0.101115232 |
| ENSDART00000110016 | ube2ql1            | -0.274241146 | -0.513839036 | -0.485900432 | -0.131799131 |
| ENSDART00000110033 | abhd8b             | -0.069420963 | -0.144372686 | -0.35601389  | -0.098305508 |
| ENSDART00000110040 | sox11a             | 1.573346229  | 1.723237215  | 1.23195588   | 0.781584101  |
| ENSDART00000110041 | lrrc38a            | -0.167375954 | -0.314913504 | -0.608219505 | -0.293673506 |
| ENSDART00000110061 | spock2             | -0.746309396 | -0.624301954 | -0.158480844 | 0.116789254  |
| ENSDART00000110064 | plaua              | 1.293433748  | 1.730730518  | 1.0162544    | 0.507140212  |
| ENSDART00000110069 | CABZ01075131.1     | -0.117445692 | -0.062527677 | 0.307574487  | 0.429328576  |
| ENSDART00000110076 | gas1a              | -0.414278752 | -0.328067296 | -0.317423655 | -0.582681301 |
| ENSDART00000110080 | aatka              | -0.15444172  | -0.531359629 | -0.399426039 | -0.066680489 |
| ENSDART00000110092 | mdga1              | -0.307586742 | -0.496736277 | -0.237358341 | -0.048338544 |
| ENSDART00000110100 | hint3              | 0.280351117  | 0.473623985  | 0.484346588  | 0.216760955  |
| ENSDART00000110126 | cacng3b            | -0.394325343 | -0.354117689 | -0.012321564 | 0.185829622  |
| ENSDART00000110136 | cntnap5b           | -0.584561492 | -0.553235513 | -0.330365654 | 0.070638148  |
| ENSDART00000110204 | pikfyve            | 0.281293639  | 0.125670374  | 0.334758542  | 0.135267095  |
| ENSDART00000110224 | mon1bb             | -0.275995109 | -0.242724773 | -0.120595351 | -0.023350049 |
| ENSDART00000110241 | cnksr2a            | -0.309766586 | -0.445156957 | -0.12266438  | -0.140501824 |
| ENSDART00000110270 | pwp2h              | 0.562435944  | 0.598132459  | 0.373677258  | 0.062993981  |
| ENSDART00000110278 | rassf9             | -0.213149801 | -0.230795795 | -0.114749715 | -0.801660509 |
| ENSDART00000110279 | si:dkey-183c6.8    | -0.455316373 | -0.174866477 | 0.555526708  | 0.790514442  |
| ENSDART00000110331 | PTGFRN (1 of many) | -0.468065048 | -0.642664771 | -0.293257997 | -0.171150885 |
| ENSDART00000110370 | nrcama             | 0.101341326  | 0.125318979  | 0.288644016  | 0.298095665  |
| ENSDART00000110377 | zgc:194398         | -0.335442291 | -0.298995581 | -0.514027337 | -0.216616028 |
| ENSDART00000110383 | map7a              | -0.540958501 | -0.669475763 | -0.490700501 | -0.102714716 |
| ENSDART00000110409 | frmd5              | -0.554751162 | -0.59840736  | -0.384150671 | 0.071106799  |
| ENSDART00000110411 | cerkl              | -0.014858902 | -0.169171069 | -0.284528511 | -0.188701157 |
| ENSDART00000110416 | eif2b5             | 0.075177684  | 0.238615258  | 0.255578096  | 0.114861074  |
| ENSDART00000110424 | si:ch211-153b23.4  | 0.636187514  | 1.795807227  | 1.178477605  | -0.329338933 |

|                    |                   |              |              |              |              |
|--------------------|-------------------|--------------|--------------|--------------|--------------|
| ENSDART00000110431 | si:ch73-280o22.2  | -0.128270202 | -0.267395445 | -0.366965125 | -0.13375727  |
| ENSDART00000110432 | kazna             | -0.433352738 | -0.292283864 | -0.217890679 | -0.318143053 |
| ENSDART00000110447 | slitrk3b          | -0.707318961 | -0.905108657 | -0.279729387 | -0.217159944 |
| ENSDART00000110458 | fam117ab          | 0.691322185  | 0.501468791  | 0.171633838  | -0.275806067 |
| ENSDART00000110478 | zgc:174906        | 0.44828184   | 1.063594358  | 0.857934554  | 0.434989632  |
| ENSDART00000110497 | tmem63a           | 0.205919412  | 0.504153398  | 0.414725435  | 0.171827856  |
| ENSDART00000110503 | adam11            | -0.835498408 | -0.874358127 | 0.055154913  | 0.615136144  |
| ENSDART00000110512 | ybx1              | 0.187678935  | 0.306636132  | 0.543417204  | 0.157462635  |
| ENSDART00000110522 | tulp1a            | -0.068953976 | -0.228376734 | -0.263123945 | -0.07738281  |
| ENSDART00000110529 | bub1bb            | 1.321570387  | 1.337769105  | 1.007493385  | 0.59867765   |
| ENSDART00000110544 | znf219            | -0.234403747 | -0.210413301 | -0.211690001 | -0.32688667  |
| ENSDART00000110547 | ANKRD34A          | -0.459666228 | -0.579840169 | -0.409587984 | -0.250229823 |
| ENSDART00000110571 | fam150a           | -0.089437558 | -0.463371816 | -0.643350488 | -0.328581938 |
| ENSDART00000110588 | cdh26.1           | 1.937401648  | 2.777818936  | 3.097440102  | 2.219591598  |
| ENSDART00000110590 | VSTM2B            | -0.57346103  | -0.627600936 | -0.34222959  | -0.040178972 |
| ENSDART00000110595 | si:dkey-188g12.1  | -0.689058181 | -0.354561593 | -0.987489008 | -0.761086303 |
| ENSDART00000110606 | abhd16a           | 0.034068276  | -0.290276411 | -0.385494504 | -0.249441823 |
| ENSDART00000110622 | si:ch211-222l21.1 | 0.830701135  | 0.950120833  | 0.646058632  | 0.069324807  |
| ENSDART00000110627 | EPB41L1           | 0.536765101  | 1.012243023  | 0.739789984  | 0.259906496  |
| ENSDART00000110633 | cdon              | -0.443468077 | -0.07594048  | -0.652877368 | -0.650457598 |
| ENSDART00000110679 | lrfn5b            | -0.958299909 | -0.447121499 | 0.131848444  | 0.317540452  |
| ENSDART00000110691 | wnt6b             | 2.452564896  | 1.637817496  | 0.779324842  | 0.681102996  |
| ENSDART00000110696 | mxb               | -0.714840475 | -2.62990329  | 3.629462021  | -0.04990443  |
| ENSDART00000110734 | FAM163A           | -0.371556039 | -0.423320211 | -0.272260914 | 0.021575603  |
| ENSDART00000110751 | tiam1a            | -0.473694473 | -0.373415926 | 0.157725394  | 0.265421677  |
| ENSDART00000110777 | eef1db            | 0.19406492   | 0.18930318   | 0.407362874  | -0.014164442 |
| ENSDART00000110789 | esyt2b            | -0.389945342 | -0.213760019 | -0.33183342  | -0.035634516 |
| ENSDART00000110804 | hspb15            | 0.646957051  | 1.106828293  | 1.50955981   | 0.885055615  |
| ENSDART00000110814 | fam83b            | -0.195583845 | -0.26819738  | -0.2682294   | -0.101487813 |
| ENSDART00000110821 | ttc19             | -0.356526006 | -0.209564592 | -0.274076967 | -0.065932254 |
| ENSDART00000110824 | wdr17             | -0.247986884 | -0.387190174 | -0.468364816 | -0.181828903 |
| ENSDART00000110835 | myo18aa           | -0.29501199  | -0.246090679 | -0.193185897 | -0.027559028 |
| ENSDART00000110842 | rps2              | 0.387589328  | 0.42480999   | 0.452974598  | 0.136625115  |
| ENSDART00000110848 | HBZ (1 of many)   | 0.826283934  | 0.913969919  | 1.466570031  | 0.062329776  |
| ENSDART00000110854 | elk1              | -0.317422178 | -0.365267467 | -0.144808984 | -0.160403171 |
| ENSDART00000110866 | cln5              | 0.673394988  | 0.327334357  | 0.152385216  | -0.174612372 |
| ENSDART00000110879 | magi2b            | -0.318025437 | -0.557603079 | -0.245924365 | -0.15150652  |
| ENSDART00000110883 | akap12b           | 0.700660963  | 1.064613646  | 0.897645503  | 0.160893575  |
| ENSDART00000110884 | zmiz1a            | -0.245374026 | -0.039847801 | 0.243895684  | 0.299607928  |
| ENSDART00000110923 | cnksr2b           | -0.347259219 | -0.644524762 | -0.33094872  | 0.06260613   |
| ENSDART00000110935 | si:ch1073-59l16.1 | 1.356882908  | 0.676384004  | 0.249167454  | 0.069788375  |
| ENSDART00000110964 | bag6              | 0.132774646  | 0.150367292  | 0.354477336  | 0.199439987  |
| ENSDART00000110974 | zdhhc12b          | -0.321463982 | -0.336778233 | -0.359206693 | -0.209775575 |
| ENSDART00000110976 | col19a1           | -0.113310455 | -0.554338462 | -0.336015886 | -0.135833904 |
| ENSDART00000110994 | sqlea             | 0.510664466  | 1.875874264  | 2.415595993  | 1.866281513  |
| ENSDART00000111002 | si:ch211-74f19.2  | 0.463826256  | 0.294740419  | -0.053551592 | -0.452436201 |
| ENSDART00000111021 | si:dkeyp-14d3.1   | -0.147889699 | -0.589075251 | -0.655456899 | -0.257575305 |
| ENSDART00000111025 | boc               | -0.443385595 | -0.283925154 | -0.350248278 | -0.500405723 |
| ENSDART00000111055 | kcna4             | -0.237309303 | -0.448087799 | -0.436530246 | -0.275701844 |
| ENSDART00000111058 | mpx               | 0.612551173  | 0.415979564  | 0.081520104  | -3.505775593 |
| ENSDART00000111080 | adgrb3            | -0.692483265 | -0.604853517 | -0.34586076  | -0.181234915 |

|                    |                    |              |              |              |              |
|--------------------|--------------------|--------------|--------------|--------------|--------------|
| ENSDART00000111088 | depdc5             | 0.225009609  | 0.230516632  | 0.305363773  | 0.172290661  |
| ENSDART00000111108 | CABZ01071972.1     | -0.309847536 | -0.540379608 | -0.256707009 | -0.057294184 |
| ENSDART00000111111 | nlgn4b             | -0.558022607 | -0.771924705 | -0.300759795 | -0.167214796 |
| ENSDART00000111131 | elfn1b             | -1.012125284 | -0.755320746 | -0.301892543 | 0.27076153   |
| ENSDART00000111140 | rpl29              | 0.336664553  | 0.356246951  | 0.105865493  | -0.061220703 |
| ENSDART00000111146 | si:ch211-26b3.4    | -0.414256231 | -0.420417531 | -0.178854692 | 0.040407002  |
| ENSDART00000111156 | pdp1               | -0.641430349 | -0.338633085 | -0.014499951 | 0.034332362  |
| ENSDART00000111165 | best2              | -0.15773889  | -0.249582303 | -0.643700083 | -1.151697377 |
| ENSDART00000111189 | gar1               | 0.542751892  | 0.313383695  | 0.267097115  | 0.089542944  |
| ENSDART00000111203 | tagln3a            | -0.530904757 | -0.489741378 | -0.221881281 | -0.037658487 |
| ENSDART00000111213 | ubash3bb           | -0.454832578 | -0.295198237 | 0.117674424  | 0.358244958  |
| ENSDART00000111234 | gdpd5a             | -0.267734676 | -0.323349922 | -0.30731905  | -0.184332435 |
| ENSDART00000111246 | cadm3              | -0.068241621 | -0.322804819 | -0.138950978 | -0.087560594 |
| ENSDART00000111261 | cdh24b             | -0.501530291 | -0.712397312 | -0.362295258 | -0.168930493 |
| ENSDART00000111271 | CABZ01080074.2     | 0.091182245  | -0.411344825 | -0.551440399 | -0.297376381 |
| ENSDART00000111278 | sorcs2             | -0.061568527 | 0.240045859  | 0.726875042  | 0.744539967  |
| ENSDART00000111301 | luzp2              | -0.629816567 | -0.548346899 | 0.040106065  | 0.088332731  |
| ENSDART00000111303 | rfx7               | 0.075232989  | 0.085195342  | 0.459783838  | 0.727409902  |
| ENSDART00000111308 | bbs9               | -0.095835492 | -0.30952763  | -0.39815573  | -0.067617558 |
| ENSDART00000111321 | zgc:152830         | 0.702895787  | 0.346388089  | 0.27465484   | 0.003141495  |
| ENSDART00000111323 | AMIGO3 (1 of many) | -0.274114526 | -0.487248865 | -0.174614423 | -0.21591611  |
| ENSDART00000111324 | zgc:193807         | 2.638791453  | 3.489955154  | 3.039693941  | 3.396234279  |
| ENSDART00000111343 | lmf2a              | -0.264313993 | -0.256081583 | -0.425329386 | -0.228346273 |
| ENSDART00000111374 | ndufs7             | -0.171726296 | -0.309298972 | -0.568241927 | -0.290550046 |
| ENSDART00000111400 | kel                | 0.291873396  | 0.332474665  | 0.393429393  | 0.121747313  |
| ENSDART00000111435 | hdac5              | -0.290855518 | -0.361511948 | -0.278953131 | -0.082259238 |
| ENSDART00000111438 | mgea5              | -0.307275123 | -0.024811963 | 0.160874404  | 0.159343333  |
| ENSDART00000111444 | ppip5k1a           | -0.365205244 | -0.30690644  | -0.053146194 | 0.037826946  |
| ENSDART00000111453 | myo19              | -0.517639897 | -0.807225171 | -0.660718539 | -0.325322766 |
| ENSDART00000111454 | UBA6               | -0.095626975 | 0.120665542  | 0.496662318  | 0.328619297  |
| ENSDART00000111456 | rbm10              | -0.2435311   | -0.244375112 | -0.319750026 | -0.111931812 |
| ENSDART00000111475 | pcdh7a             | 0.109274008  | 0.268985487  | 0.465377244  | 0.354118271  |
| ENSDART00000111480 | bcorl1             | 0.013917394  | 0.173170994  | 0.344992278  | 0.232054818  |
| ENSDART00000111506 | lrrc75ba           | -0.649545281 | -0.408918781 | -0.064365089 | 0.060080923  |
| ENSDART00000111509 | CABZ01072096.1     | -0.19271783  | -0.37213696  | -0.269302922 | -0.183488656 |
| ENSDART00000111531 | epdl1              | 1.357192284  | 1.365774088  | 0.753975689  | 0.235060778  |
| ENSDART00000111535 | elfn1a             | -0.273088167 | -0.336173663 | -0.097567542 | 0.139029668  |
| ENSDART00000111536 | rmdn2              | -0.153020266 | -0.402861584 | -0.346146607 | -0.222410217 |
| ENSDART00000111539 | efcc1              | -0.101491995 | 0.211154978  | -0.621378561 | -0.272291709 |
| ENSDART00000111555 | fbxo10             | -0.524035405 | 0.01323878   | -0.15955536  | 0.008552029  |
| ENSDART00000111561 | zmp:0000000735     | 0.220285812  | 0.110420777  | 1.549961519  | 0.06406158   |
| ENSDART00000111571 | rap1gap2b          | -0.543266541 | -0.656699315 | -0.515603594 | -0.222139298 |
| ENSDART00000111625 | ninl               | -0.236310585 | -0.326810382 | -0.437556672 | -0.154099243 |
| ENSDART00000111636 | DTX4 (1 of many)   | -1.011696111 | -1.148570348 | -0.809918586 | -0.692193186 |
| ENSDART00000111639 | rereb              | -0.168137061 | -0.390988508 | -0.080335114 | 0.086629083  |
| ENSDART00000111641 | morn4              | 0.104472779  | 0.38320597   | 0.615725038  | 0.556227667  |
| ENSDART00000111642 | brinp3a.1          | -0.710663483 | -0.69660402  | -0.30207639  | -0.147819903 |
| ENSDART00000111656 | gpr78a             | -0.727925057 | -0.963113505 | -0.708360358 | -0.204121228 |
| ENSDART00000111666 | npdc1a             | -0.090316422 | -0.266587539 | -0.30135563  | -0.100212297 |
| ENSDART00000111671 | mri1               | 1.003264298  | 0.870246845  | 1.443034807  | 1.04475049   |
| ENSDART00000111680 | iqsec2b            | -0.255745447 | -0.305278608 | -0.149665745 | -0.145530664 |

|                    |                      |              |              |              |              |
|--------------------|----------------------|--------------|--------------|--------------|--------------|
| ENSDART00000111688 | zgc:109934           | 0.61674072   | 0.212807687  | -0.164219088 | -0.482167701 |
| ENSDART00000111706 | si:dkey-108k21.14    | 0.724790653  | 1.05338345   | 1.058888091  | 0.439899526  |
| ENSDART00000111707 | cacnb1               | 1.693120335  | 2.349827744  | 2.415610432  | 1.652036859  |
| ENSDART00000111717 | fscn2b               | -0.120313044 | -0.274854028 | -0.483029563 | -0.127989104 |
| ENSDART00000111724 | hist1h4l             | 0.596018889  | 0.814003935  | 0.407366731  | 0.206389719  |
| ENSDART00000111748 | pcdhb                | 0.251557806  | 0.39162054   | 0.85552916   | 0.748922663  |
| ENSDART00000111753 | vmp1                 | 3.174699109  | 3.199538621  | 2.234258919  | 1.662616904  |
| ENSDART00000111758 | si:ch211-165d12.4    | 0.498072983  | 0.272355872  | -0.037512583 | -0.064496932 |
| ENSDART00000111759 | zmp:0000000794       | -0.428447438 | -0.466968786 | -0.39807432  | -0.23111401  |
| ENSDART00000111767 | si:ch211-39k3.2      | -0.094085509 | -0.095643794 | -0.600534706 | -0.396103136 |
| ENSDART00000111799 | HEPACAM (1 of many)  | -0.300776869 | -0.301240305 | -0.377807505 | -0.329578876 |
| ENSDART00000111806 | cenpe                | 1.006157891  | 0.692740621  | 0.695639634  | 0.175054418  |
| ENSDART00000111823 | GRIK3                | -0.298812703 | -0.633195231 | -0.313411843 | -0.167732562 |
| ENSDART00000111841 | BX248501.1           | -0.587056195 | -1.220156186 | -0.870300177 | -0.776464497 |
| ENSDART00000111842 | sall1a               | -0.3702182   | -0.245271728 | -0.043742586 | 0.007554245  |
| ENSDART00000111880 | PDE2A                | -0.027201032 | -0.255047431 | -0.265146028 | -0.145249945 |
| ENSDART00000111905 | BX649498.1           | -0.175767299 | -0.206924623 | -0.494153858 | -0.425985895 |
| ENSDART00000111923 | ajuba                | 0.639088613  | 1.058968297  | 0.866425943  | 0.103913512  |
| ENSDART00000111948 | sez6l2               | -0.5142749   | -0.140866125 | 0.323444655  | 0.419947542  |
| ENSDART00000111966 | arhgef10lb           | 0.250651161  | 0.391053857  | 0.470093443  | 0.290981355  |
| ENSDART00000111982 | sgce                 | -0.25805142  | -0.148921708 | -0.040980656 | -0.017549451 |
| ENSDART00000111993 | si:dkey-19b23.15     | -0.211537347 | -0.357802737 | -0.511679441 | -0.364770311 |
| ENSDART00000112003 | adgrb1a              | -0.32135813  | -0.631154823 | -0.317944877 | 0.097147786  |
| ENSDART00000112028 | si:ch211-180f4.1     | 2.108953042  | 1.952679055  | 1.909638244  | 1.352861352  |
| ENSDART00000112032 | ARHGAP22 (1 of many) | 0.396989069  | 0.894459004  | 1.264783984  | 1.011214691  |
| ENSDART00000112075 |                      | 0.743523521  | 0.909798042  | 1.147105824  | 0.978802209  |
| ENSDART00000112079 | tlcd2                | 0.75377096   | 1.111252223  | 1.10627033   | 0.372244628  |
| ENSDART00000112106 | fam155a              | -0.397020883 | -0.419375873 | -0.258307362 | -0.051593808 |
| ENSDART00000112116 | ctss2.1              | 1.048314865  | 0.112315631  | 0.133571721  | -0.538227279 |
| ENSDART00000112127 | dnase2b              | 0.959684518  | 0.954914684  | 0.226944152  | -0.0439051   |
| ENSDART00000112152 | gas7a                | -0.397395182 | -0.5126218   | -0.479089603 | -0.475145138 |
| ENSDART00000112155 | rrm2                 | 1.131329801  | 1.215867796  | 0.761186289  | 0.339828406  |
| ENSDART00000112156 | si:ch211-253b8.5     | -0.087783514 | -0.192500909 | -0.49330541  | -0.306875488 |
| ENSDART00000112166 | fam60al              | -0.06751471  | 0.448215095  | 0.685621255  | 0.373624581  |
| ENSDART00000112170 | unm_hu7912           | -0.404814593 | -0.573062573 | -0.192411138 | 0.071188401  |
| ENSDART00000112183 | cep170b              | 0.178654359  | -0.17509023  | -0.407988469 | -0.254556637 |
| ENSDART00000112201 | mat2aa               | 0.26207582   | 0.205858664  | 0.104925379  | 0.050770536  |
| ENSDART00000112211 | si:ch211-264f5.2     | 0.548989898  | 0.369154347  | -0.087668194 | -1.075571179 |
| ENSDART00000112227 | BRINP3 (1 of many)   | -0.375889079 | -0.310381341 | -0.391723747 | -0.183098379 |
| ENSDART00000112243 | crlf1a               | 1.589627089  | 0.916105309  | 0.558277873  | -0.020827681 |
| ENSDART00000112270 | tanc2a               | -0.071755517 | -0.057687988 | 0.274000197  | 0.309857736  |
| ENSDART00000112287 | gas2l1               | -0.30204098  | -0.119087794 | 0.361891535  | 0.246536224  |
| ENSDART00000112296 | si:ch211-152n14.4    | -3.416151322 | -1.061691573 | -0.948841593 | -2.14718796  |
| ENSDART00000112299 | gpr37a               | -0.365323083 | -0.2884934   | -0.319868677 | -0.150652035 |
| ENSDART00000112301 | trhde.1              | -0.264986832 | -0.332160295 | -0.182975887 | -0.056935825 |
| ENSDART00000112312 | lrch2                | 0.101952948  | 0.206054969  | 0.497048672  | 0.404162087  |
| ENSDART00000112313 | wdr43                | 2.967338106  | 2.621161906  | 3.405726008  | 2.58425126   |
| ENSDART00000112330 | rassf7a              | -0.0890413   | -0.097498745 | -0.456633564 | -0.220562537 |
| ENSDART00000112333 | cnnm2b               | -0.413171039 | -0.296279679 | -0.539640998 | -0.529524127 |
| ENSDART00000112370 | ano11                | -1.080551268 | -1.39069517  | -0.608655336 | 0.046438031  |
| ENSDART00000112407 |                      | -0.278472028 | -0.07282662  | 0.029836447  | -0.030627475 |

|                    |                    |              |              |              |              |
|--------------------|--------------------|--------------|--------------|--------------|--------------|
| ENSDART00000112414 | rapgef5a           | -0.533059964 | -0.605979704 | -0.027243653 | 0.007460247  |
| ENSDART00000112438 | si:ch73-335m24.5   | -0.12977304  | -0.024649938 | 0.356284768  | 0.481799029  |
| ENSDART00000112441 | tlr7               | -0.49393668  | -0.654080017 | -0.57399465  | -0.158959649 |
| ENSDART00000112445 | tns2a              | 0.230856175  | 0.361046363  | 0.629539855  | -0.041949691 |
| ENSDART00000112460 | dolk               | 0.234400054  | 0.274257795  | 0.504999751  | 0.504335897  |
| ENSDART00000112470 | ccdc88b            | 0.86030789   | 0.601824136  | 0.501988839  | -0.28013627  |
| ENSDART00000112484 | nlgm2b             | -0.707313853 | -0.645741453 | -0.193542068 | 0.120518294  |
| ENSDART00000112493 | syt6a              | -0.290141292 | -0.351590983 | -0.39435722  | -0.242348488 |
| ENSDART00000112495 | zgc:110340         | 0.095667849  | -0.009447766 | 0.241257465  | 0.332404774  |
| ENSDART00000112529 | znf319a            | -0.271600655 | -0.228932764 | -0.01869534  | 0.01981331   |
| ENSDART00000112546 | pkn3               | -0.415654116 | -0.225897422 | -0.124759806 | -0.079978695 |
| ENSDART00000112550 | mapk9              | 0.429625805  | 0.878911558  | 0.999507915  | 0.700660398  |
| ENSDART00000112555 | spc25              | 0.851542956  | 0.93394939   | 0.260782437  | -0.118635043 |
| ENSDART00000112567 | ppfia4             | -0.303784132 | -0.279792224 | 0.037275964  | 0.113653516  |
| ENSDART00000112579 | scg2b              | -0.360046965 | -0.210825369 | -0.351760362 | -0.440018453 |
| ENSDART00000112589 | efna2b             | -0.324619544 | 0.075961218  | 0.539972471  | 0.527283417  |
| ENSDART00000112598 | otud4              | 0.000834797  | 0.118841749  | 0.673957038  | 0.019221004  |
| ENSDART00000112646 | CNNM1              | -0.428104026 | -0.544400388 | -0.592385966 | -0.267977747 |
| ENSDART00000112653 | wdfy4              | 0.841684139  | 0.566530892  | 0.08064366   | -0.41519717  |
| ENSDART00000112655 | nfasca             | -0.501256457 | -0.441261682 | -0.289256026 | -0.116172993 |
| ENSDART00000112659 | ipp                | 0.043576539  | 0.16998945   | 0.371873925  | 0.242338779  |
| ENSDART00000112671 | bicd1a             | -0.391567366 | -0.28876668  | -0.040397452 | 0.195532163  |
| ENSDART00000112694 | fam171a2b          | -0.001835186 | 0.12088862   | 0.541529951  | 0.657778888  |
| ENSDART00000112698 | RNF14 (1 of many)  | 0.142790619  | 0.542852416  | 0.218671557  | 0.088301354  |
| ENSDART00000112711 | kcnab1b            | -0.291029319 | -0.341790858 | -0.379711216 | -0.329063836 |
| ENSDART00000112728 | tmem175            | -0.092618029 | 0.36107371   | 0.426939782  | 0.221686367  |
| ENSDART00000112735 | fam19a1a           | -0.689638571 | -0.889095001 | -0.657230812 | -0.483951597 |
| ENSDART00000112743 | nmbb               | -0.255890888 | -1.177861162 | -0.767211345 | -0.814299265 |
| ENSDART00000112768 | ubald1a            | -0.163342676 | -0.260286427 | -0.366999537 | -0.147535942 |
| ENSDART00000112789 | AKAP13 (1 of many) | 0.092610458  | -0.131036675 | -0.325814147 | -0.202546922 |
| ENSDART00000112845 | zgc:195173         | -0.156651959 | -0.182049019 | -0.580426063 | -0.462296521 |
| ENSDART00000112856 | TNC (1 of many)    | -0.33689758  | -0.285587425 | -0.51132075  | -1.127367477 |
| ENSDART00000112883 | fmnl2b             | -0.095811604 | 0.162122972  | 0.557976718  | 0.595265469  |
| ENSDART00000112895 | FNDC10             | -0.46103084  | -0.039905964 | 0.379016706  | 0.57822448   |
| ENSDART00000112900 | si:ch211-150i13.1  | -0.166104961 | -0.246781433 | -0.279012086 | -0.114516059 |
| ENSDART00000112909 | tex2l              | -0.590392514 | -0.678584931 | -0.756484503 | -0.42899031  |
| ENSDART00000112926 | adora1b            | 0.387978003  | 0.609753862  | 0.576471225  | 0.261995134  |
| ENSDART00000112956 | slc9a6b            | -0.347273739 | -0.284992324 | -0.155606241 | -0.015875628 |
| ENSDART00000112959 | ankrd1a            | 2.226071129  | 3.68265785   | 3.832168007  | 2.790435602  |
| ENSDART00000112967 | rilp               | -0.073950343 | -0.174960248 | -0.511756745 | -0.145692497 |
| ENSDART00000112987 | stk32a             | -0.326877709 | -0.547605605 | -0.241724362 | 0.046529539  |
| ENSDART00000113004 | CABZ01068356.1     | -0.41749624  | -0.503262627 | -0.597219984 | -0.132734415 |
| ENSDART00000113058 | gpsm2              | -0.158548143 | -0.583640034 | -0.403831438 | -0.106682634 |
| ENSDART00000113077 | FERMT3 (1 of many) | 0.719070873  | 0.278758571  | 0.151005206  | -0.238328508 |
| ENSDART00000113081 | gpr158b            | -0.777838913 | -0.859733549 | -0.109236002 | 0.425659764  |
| ENSDART00000113087 | hmx1               | -0.389387565 | 0.021377927  | 0.234018679  | 0.270888749  |
| ENSDART00000113089 | slc4a11            | -0.230777933 | -0.44932083  | -0.596234565 | -0.271629672 |
| ENSDART00000113092 | abhd10b            | 0.399222781  | 0.423215001  | 0.172340204  | 0.123654926  |
| ENSDART00000113093 | gba                | 0.473554928  | 0.246228233  | -0.028007284 | -0.118288896 |
| ENSDART00000113097 | hsd17b7            | -0.488876774 | 0.314769091  | 0.517151777  | 0.148788215  |
| ENSDART00000113098 | hbaa1              | 0.802810656  | 0.919517173  | 1.438314563  | 0.102144076  |

|                    |                    |              |              |              |              |
|--------------------|--------------------|--------------|--------------|--------------|--------------|
| ENSDART00000113101 | smarcad1b          | 0.481835623  | 0.651517984  | 0.685097173  | 0.491069329  |
| ENSDART00000113112 | wscd1b             | 0.189205134  | 0.487630626  | 0.094129579  | 0.021242458  |
| ENSDART00000113135 | msl1a              | -0.136399644 | -0.187672093 | -0.188075662 | -0.302625769 |
| ENSDART00000113142 | phldb1b            | 0.143763621  | 0.070606141  | 0.367437708  | 0.295748576  |
| ENSDART00000113162 | pi4kaa             | -0.145989753 | -0.358429295 | -0.235575632 | -0.007193852 |
| ENSDART00000113166 | si:ch1073-159d7.7  | 2.749837608  | 3.675596621  | 2.897443721  | 1.850742921  |
| ENSDART00000113171 | nlgn1              | -0.287475058 | -0.532070389 | -0.095767589 | 0.228264127  |
| ENSDART00000113193 | cbln2a             | -0.405462517 | -0.494893494 | -0.545170143 | -0.282281473 |
| ENSDART00000113196 | si:ch211-157b11.14 | -0.299973945 | -0.39773998  | -0.291303207 | -0.069868393 |
| ENSDART00000113197 | prok1              | -0.431580361 | -0.477066939 | -0.390033973 | -0.689815046 |
| ENSDART00000113241 | tmem163a           | 0.329551441  | 0.273820345  | 0.385569684  | 0.333416277  |
| ENSDART00000113246 | si:ch211-102c2.4   | 0.606357076  | 0.357270403  | 0.232028808  | -0.115778826 |
| ENSDART00000113248 | b3galt1b           | -0.287109392 | -0.341327689 | -0.370081074 | -0.245129506 |
| ENSDART00000113259 | TARBP1             | 0.600840202  | 0.638996908  | 0.05884907   | -0.019773553 |
| ENSDART00000113280 | FRMD5 (1 of many)  | -0.439670364 | -0.372637017 | -0.247112316 | -0.218940122 |
| ENSDART00000113301 | si:dkeyp-41f9.3    | -0.138197975 | -0.385879672 | -0.585370915 | -0.421818221 |
| ENSDART00000113311 | col9a1a            | 0.34651107   | 0.351090918  | -0.438999012 | -0.868499411 |
| ENSDART00000113332 | nav2a              | 0.038264794  | -0.31474256  | -0.162187636 | 0.073256894  |
| ENSDART00000113342 | tox3               | -0.349601618 | -0.245853476 | -0.159173384 | -0.016959002 |
| ENSDART00000113347 |                    | -0.143628386 | 0.120543612  | 0.968351441  | 1.05709332   |
| ENSDART00000113351 | ncapd2             | 0.642337818  | 0.531864694  | 0.423422126  | 0.276399068  |
| ENSDART00000113356 | crtc1a             | -0.294987163 | -0.303249696 | -0.252865857 | -0.15461469  |
| ENSDART00000113358 | wdtdc1             | -0.236133684 | -0.265438127 | -0.168580048 | -0.081863191 |
| ENSDART00000113362 | ip6k1              | -0.059673843 | -0.326658711 | -0.456047384 | -0.047258149 |
| ENSDART00000113376 | fam13b             | -0.247096949 | -0.341873515 | -0.575011995 | -0.179280023 |
| ENSDART00000113384 | lyrm4              | -0.082514668 | -0.167513155 | -0.434528553 | -0.231621665 |
| ENSDART00000113405 | inpp5d             | 0.955185108  | 0.470897855  | 0.050793817  | -0.341647614 |
| ENSDART00000113414 | kirrel3a           | -0.106976766 | -0.45848865  | -0.133882402 | 0.030163053  |
| ENSDART00000113418 | igsf3              | 0.097020516  | 0.19405944   | 0.607620623  | 0.491282072  |
| ENSDART00000113441 | mylk5              | 0.7890096    | 0.412195956  | -0.130414718 | -0.622741882 |
| ENSDART00000113448 | WDR31              | -0.320489538 | -0.191593939 | -0.444041238 | -0.334593236 |
| ENSDART00000113449 | LEPROT             | 0.490278812  | 0.508314674  | 0.201181129  | 0.107244197  |
| ENSDART00000113454 | chgb               | -0.341137392 | -0.331982228 | -0.294276744 | -0.206705528 |
| ENSDART00000113486 | mxra5a             | 0.309757309  | 0.386526989  | 0.398748931  | 0.219293393  |
| ENSDART00000113493 | tmem14ca           | -0.005514111 | -0.126364666 | -0.303791848 | -0.180226659 |
| ENSDART00000113494 | MB21D2 (1 of many) | -0.150231845 | 0.017615171  | 0.437179993  | 0.383202322  |
| ENSDART00000113502 | si:dkey-84j12.1    | -0.363232597 | -0.10430598  | 0.492332906  | 0.665079551  |
| ENSDART00000113511 | lzt1               | -1.206756297 | -0.713910989 | -0.061680884 | 0.474255612  |
| ENSDART00000113524 | fam20ca            | -0.141135887 | -0.526654581 | -0.212681972 | 0.069156499  |
| ENSDART00000113532 | CABZ01053588.1     | 0.66169386   | 1.399901635  | 1.305166578  | 0.721799042  |
| ENSDART00000113550 | si:dkey-16p21.7    | -0.102214974 | 0.203772916  | 0.542107134  | 0.32053481   |
| ENSDART00000113551 | trim2b             | -0.50417548  | -0.207383112 | -0.112448816 | 0.043074002  |
| ENSDART00000113574 | anln               | 1.428520356  | 0.903846206  | 0.598652735  | 0.284032371  |
| ENSDART00000113589 | gpx4b              | 0.633021831  | -0.10742897  | -0.312510701 | -0.292370818 |
| ENSDART00000113643 | fbxo25             | 0.400029831  | 0.002394742  | -0.303777301 | 0.069383699  |
| ENSDART00000113649 | imp1a              | -0.10562067  | -0.311339049 | -0.59002435  | -0.135488682 |
| ENSDART00000113655 | tmem26a            | 0.744638282  | 1.01684072   | 1.017300963  | 0.48692919   |
| ENSDART00000113661 | kif16bb            | -0.079672799 | -0.046364361 | -0.755779075 | -0.266178188 |
| ENSDART00000113673 | scpp5              | 1.321767426  | 0.530715467  | 0.931995129  | 0.748355856  |
| ENSDART00000113699 | hgfb               | 1.149006949  | 1.556415854  | 1.569424226  | 0.45979101   |
| ENSDART00000113732 | orc6               | 1.104098282  | 1.496929933  | 0.974585154  | 0.388395497  |



|                    |                   |              |              |              |              |
|--------------------|-------------------|--------------|--------------|--------------|--------------|
| ENSDART00000113734 | chrdl2            | -0.47545279  | -0.359333121 | -0.57438139  | -0.417914769 |
| ENSDART00000113752 | si:dkey-6i22.5    | 1.012202134  | 1.421252013  | 0.919204178  | 0.319242336  |
| ENSDART00000113773 | cdc42bpab         | -0.428966416 | -0.296406465 | 0.003528598  | 0.157857062  |
| ENSDART00000113789 | zgc:198419        | 1.388791656  | 0.463187117  | 0.161859067  | -0.160692863 |
| ENSDART00000113796 | cacnb3b           | -1.378695476 | -1.717513295 | -0.09050578  | 0.468842834  |
| ENSDART00000113799 | si:ch211-132b12.7 | 0.091573373  | -0.269264305 | -0.847675231 | -0.371595689 |
| ENSDART00000113805 | nfatc2b           | -0.301956989 | -0.356397992 | -0.30237662  | -0.2051156   |
| ENSDART00000113829 | cdca7b            | 1.046232255  | 1.184963787  | 0.646928123  | 0.587090661  |
| ENSDART00000113842 | dpep2             | -0.005800421 | 0.049668681  | -0.202900206 | -0.709132578 |
| ENSDART00000113847 | chpfa             | -0.17880495  | -0.243387936 | -0.273328364 | -0.205137329 |
| ENSDART00000113853 | prokr1a           | -0.220461946 | -0.109814734 | -0.599222392 | -0.17974305  |
| ENSDART00000113859 | crispld1a         | 0.006653123  | -0.124334074 | -0.47278833  | -1.109435686 |
| ENSDART00000113864 | faxca             | -0.531664025 | -0.191322961 | -0.005943785 | 0.107092327  |
| ENSDART00000113890 | rabep2            | -0.293276158 | -0.227772629 | -0.308410671 | -0.161791109 |
| ENSDART00000113912 | ntm               | -0.178976918 | -0.363265579 | -0.513893339 | -0.211182567 |
| ENSDART00000113924 | lrrc7             | -0.537461037 | -0.585108204 | -0.303180727 | -0.024642369 |
| ENSDART00000113936 | SAMD8             | 0.425621262  | 0.457128542  | 0.374121986  | 0.140204511  |
| ENSDART00000113954 | si:ch211-113e8.11 | -0.149005557 | -0.166754978 | -0.25646894  | -0.094366468 |
| ENSDART00000113985 | mctp1a            | -0.392181593 | -0.510456941 | -0.185251742 | 0.106694132  |
| ENSDART00000114000 | zgc:101663        | 0.831482698  | 0.254442158  | 0.060051833  | 0.091105397  |
| ENSDART00000114010 | slitrk3a          | -0.361859007 | -0.532282315 | -0.225491041 | 0.106517685  |
| ENSDART00000114023 | hspb9             | 2.157513115  | 1.55136025   | 0.742718373  | 1.461470885  |
| ENSDART00000114024 | fam107b           | 0.899175294  | 1.079533729  | 0.969523488  | 0.434748246  |
| ENSDART00000114026 | lingo2a           | -0.52437969  | -3.569137229 | -2.642152541 | -0.423360666 |
| ENSDART00000114069 | cnnm4b            | -0.449604106 | -0.276862048 | -0.121356457 | -0.173176154 |
| ENSDART00000114078 | si:dkey-193c22.2  | 0.250019316  | -0.054913753 | -0.32754917  | -0.367609802 |
| ENSDART00000114081 | sms               | -0.273814009 | -0.150000435 | 0.170943482  | 0.265559933  |
| ENSDART00000114083 | mcf2la            | -0.277595318 | -0.392280599 | -0.224516886 | 0.025969597  |
| ENSDART00000114098 | dkk2              | -0.775548216 | -0.461837556 | -0.163285316 | -0.107943795 |
| ENSDART00000114099 | BX545917.1        | -0.259517692 | -0.573524763 | -0.511746601 | -0.397812833 |
| ENSDART00000114117 | necab1            | -0.468499392 | -0.405674747 | -0.46743135  | -0.222378141 |
| ENSDART00000114118 | CU639468.1        | -0.073130118 | -0.36036163  | -0.387238652 | -0.163804242 |
| ENSDART00000114134 | wrb               | -0.123951898 | -0.095408141 | -0.313002762 | -0.1622087   |
| ENSDART00000114162 | ftro2             | -0.105106717 | -0.079876083 | -0.28693813  | -0.123365826 |
| ENSDART00000114168 | itga6a            | 1.998266436  | 2.016280588  | 1.463165074  | 0.79739173   |
| ENSDART00000114169 | bnip1a            | -0.010894413 | -0.404734866 | -0.484887345 | -0.670176287 |
| ENSDART00000114172 | pde6d             | -0.201449776 | -0.351770435 | -0.511138243 | -0.216254622 |
| ENSDART00000114182 | fyco1b            | 0.10137681   | -0.156409007 | -0.465781329 | -0.01243848  |
| ENSDART00000114226 | grm6b             | -0.535654703 | -0.571067618 | -0.480335418 | -0.370568762 |
| ENSDART00000114263 | zgc:194242        | -0.119842829 | -0.109342365 | -0.31411889  | -0.410626816 |
| ENSDART00000114267 | map6b             | -0.567896811 | -0.403955591 | 0.492985119  | 0.85461741   |
| ENSDART00000114272 | nop2              | 0.471489342  | 0.531037709  | 0.420888693  | 0.177047326  |
| ENSDART00000114282 | rpsa              | 0.494276409  | 0.531800028  | 0.113194341  | -0.004402994 |
| ENSDART00000114293 | areg              | -0.232855169 | -0.639973524 | -1.102041863 | -0.924035384 |
| ENSDART00000114301 | si:ch211-152p11.4 | -0.510547269 | -0.515838482 | -0.89019375  | -0.843865894 |
| ENSDART00000114319 | si:ch211-76l23.7  | -0.274578898 | -0.196596974 | -0.473622321 | -1.111584541 |
| ENSDART00000114322 | rusc1             | -0.055969033 | -0.296840251 | -0.124744669 | -0.048299568 |
| ENSDART00000114336 | FAM189B           | -0.002256766 | 0.039346929  | 0.240983806  | 0.310705552  |
| ENSDART00000114383 | mesdc1            | 0.277986788  | 0.306020697  | 0.430972974  | 0.195133048  |
| ENSDART00000114410 | wdr62             | 0.584622073  | 0.50588924   | 0.329377091  | 0.089655627  |
| ENSDART00000114432 | ntng2a            | -0.38146173  | -0.278136767 | -0.282818481 | 0.289761799  |

|                    |                   |              |              |              |              |
|--------------------|-------------------|--------------|--------------|--------------|--------------|
| ENSDART00000114442 | fndc5b            | -0.498984664 | -0.658119927 | -0.45669978  | -0.18817484  |
| ENSDART00000114448 | CHST8             | -0.44164787  | -0.464005415 | 0.047368929  | 0.426791372  |
| ENSDART00000114497 | si:dkey-204l11.1  | 0.312589581  | 0.828199841  | 0.99726607   | 0.068811015  |
| ENSDART00000114533 | mn1a              | -0.109536494 | -0.207833595 | -0.685216226 | -0.20481073  |
| ENSDART00000114611 | sipa11            | -0.211106005 | -0.264425665 | -0.102896881 | -0.110763007 |
| ENSDART00000114659 | maml3             | -0.010023722 | -0.260659863 | -0.229491996 | 0.012935978  |
| ENSDART00000114660 | opn8b             | -0.615308217 | -0.695080703 | -0.641485332 | -0.112308149 |
| ENSDART00000114663 | b4galt2           | -0.500896606 | -0.53488094  | -0.237386402 | -0.192514996 |
| ENSDART00000114676 | gstm.2            | 0.102339801  | -0.045272058 | -0.466318631 | -0.673317054 |
| ENSDART00000114677 | si:ch73-62l21.1   | -0.323827666 | -0.531978643 | -0.239685061 | 0.043755156  |
| ENSDART00000114678 | nanos1            | -0.186501948 | -0.191589001 | -0.393479142 | -1.039695471 |
| ENSDART00000114705 | gprc5bb           | -0.132340316 | -0.338695197 | -0.459834622 | -0.091865364 |
| ENSDART00000114711 | sorcs1            | -0.736062495 | -0.837966489 | -0.594713883 | -0.208228471 |
| ENSDART00000114719 | frmpd1a           | -0.29565145  | -0.338039747 | -0.498795038 | -0.059125706 |
| ENSDART00000114723 | rapgef1           | -0.431713581 | -0.430345279 | -0.085299154 | -0.113952199 |
| ENSDART00000114746 | lrrc58a           | -0.133537399 | 0.014548786  | -0.622798481 | -0.259773873 |
| ENSDART00000114748 | vip               | -0.375915262 | -0.449108971 | -0.514462327 | -0.417228927 |
| ENSDART00000114750 | gabrb2            | -0.56997023  | -0.610789713 | -0.475013901 | -0.067415538 |
| ENSDART00000114774 | ptpn5             | -0.403695841 | -0.145979825 | 0.358989634  | 0.339107007  |
| ENSDART00000114800 | INAVA (1 of many) | 0.074314999  | 0.343046405  | 0.508626667  | 0.501928464  |
| ENSDART00000114888 | picalmb           | -0.141762949 | -0.21097576  | -0.321137175 | -0.075858488 |
| ENSDART00000114909 | cuedc1a           | -0.291201492 | -0.290842243 | -0.025622448 | 0.12561667   |
| ENSDART00000114919 | si:dkey-85k7.12   | 0.382806755  | -0.226494664 | 2.101494432  | -0.132340955 |
| ENSDART00000114954 | rapgef5b          | -0.637101425 | -0.566396383 | -0.284127257 | 0.00714868   |
| ENSDART00000114959 | cdh24a            | -0.51153845  | -0.93145045  | -0.229616461 | 0.228723625  |
| ENSDART00000114964 | zgc:165573        | 0.691787708  | 0.943542464  | 0.634593348  | -0.039695615 |
| ENSDART00000114975 | slc5a7a           | -0.574231808 | -0.735930483 | -0.690375373 | -0.752661657 |
| ENSDART00000115023 | PARG              | 0.013352577  | 0.067569536  | 0.312910159  | 0.18617429   |
| ENSDART00000115027 | tmem151bb         | -0.856524713 | -0.708298022 | 0.291447963  | 0.495918048  |
| ENSDART00000115030 | dip2a             | -0.094281248 | 0.006396805  | 0.484131414  | 0.408709873  |
| ENSDART00000115049 | mych              | 2.666296724  | 2.42380403   | 1.76502541   | 0.819436082  |
| ENSDART00000115058 | pbxip1a           | -0.476509078 | -0.442420659 | -0.523364891 | -0.310557938 |
| ENSDART00000115088 | birc5a            | 0.588066272  | 0.489725837  | 0.133434985  | 0.421614791  |
| ENSDART00000115089 | zgc:171482        | -0.437080228 | -0.507022457 | -0.285662093 | 0.021798354  |
| ENSDART00000115118 | tns1a             | -0.409165389 | -0.800200161 | -0.457588882 | -0.074958883 |
| ENSDART00000115128 | usp2b             | -0.251717928 | -0.321635103 | -0.314073339 | -0.302633188 |
| ENSDART00000115130 | apbb1             | -0.260426658 | -0.249126495 | -0.138007572 | -0.113696464 |
| ENSDART00000115138 | rapgef4           | -0.335306767 | -0.551146979 | -0.593390846 | -0.144257686 |
| ENSDART00000115141 | cacnb3b           | -1.10918155  | -1.536403603 | -0.203181521 | 0.418821499  |
| ENSDART00000115157 | tuba4l            | 0.217024219  | 0.564563401  | 0.525644709  | 0.157922416  |
| ENSDART00000115161 | reps2             | -0.084468471 | -0.327140094 | -0.166340372 | -0.127803804 |
| ENSDART00000115221 | adat2             | 0.066031062  | -1.495132242 | -2.125701316 | -0.144340549 |
| ENSDART00000115224 | pvr1a             | -0.001527    | -0.239159739 | -0.512986688 | -0.121351808 |
| ENSDART00000115244 | MEX3A             | 1.222333965  | 1.709642669  | 1.900449694  | 1.354844663  |
| ENSDART00000115255 | mcf2l2            | 0.795464349  | 0.848343644  | 0.628078884  | 0.002922432  |
| ENSDART00000115260 | si:ch211-113g11.6 | -0.558167113 | -1.193520332 | -0.037233796 | 0.533309069  |
| ENSDART00000115278 | cx47.1            | -0.445735222 | -0.554690047 | -0.399294096 | -0.241214414 |
| ENSDART00000115330 | ppp1r14c          | -0.176056212 | -0.351217013 | -0.000962023 | -0.249969624 |
| ENSDART00000115343 | atp8b4            | -0.126263785 | -0.363733117 | -0.385610912 | -0.00148052  |
| ENSDART00000115354 | si:dkey-188i13.10 | 0.511265672  | 0.230301163  | 1.128651443  | -0.074861923 |
| ENSDART00000115356 | rabif             | -0.104235333 | -0.157538528 | -0.394672329 | -0.327606577 |

|                    |                   |              |              |              |              |
|--------------------|-------------------|--------------|--------------|--------------|--------------|
| ENSDART00000115365 | rassf10a          | -0.525931221 | -0.509933384 | -0.256813636 | -0.202027084 |
| ENSDART00000115370 | mettl22           | -0.250044414 | -0.320129908 | -0.572576042 | -0.437533988 |
| ENSDART00000115398 | arid5a            | 0.65326128   | 0.28174461   | 0.163458034  | -0.140420456 |
| ENSDART00000115403 | NAV1 (1 of many)  | 0.648363377  | 0.712988904  | 0.734499876  | 0.497918559  |
| ENSDART00000115417 | si:ch211-19719.2  | 0.463829162  | 0.238718738  | 0.779021857  | 0.564789152  |
| ENSDART00000115550 | RNase_MRP         | -0.088007656 | -0.32868786  | -0.789978682 | -0.744862923 |
| ENSDART00000115759 |                   | 2.750406791  | 2.822768519  | 2.52417923   | 3.741762635  |
| ENSDART00000115901 | SNORA71           | 0.179219354  | 0.724792108  | 0.150624912  | 0.373922197  |
| ENSDART00000115914 | SNORA71           | 0.179219354  | 0.724792108  | 0.150624912  | 0.373922197  |
| ENSDART00000116021 |                   | -0.209375753 | 0.199058885  | -0.850598268 | -0.180561216 |
| ENSDART00000116415 |                   | -0.367308157 | -0.297245306 | -0.576085374 | -0.866023911 |
| ENSDART00000117636 | dre-mir-21-1      | 1.553092638  | 1.563315667  | 0.906878174  | 0.77260601   |
| ENSDART00000117680 | dre-mir-21-2      | 3.366495632  | 3.222859121  | 2.199417673  | 1.472943682  |
| ENSDART00000118106 | SNORA57           | 0.429083089  | 0.942452098  | 0.631445196  | 0.725057114  |
| ENSDART00000118384 | SNORA16           | 0.565934898  | 0.9072012    | 0.499756229  | 0.494901316  |
| ENSDART00000118961 | 5S_rRNA           | -0.375589637 | -0.40645143  | -0.614838385 | -0.339165991 |
| ENSDART00000119160 | SCARNA6           | 0.120700111  | -0.063996796 | -0.81140797  | -1.067895541 |
| ENSDART00000119311 | SNORA53           | -0.615548348 | -0.821029313 | -0.724467957 | -1.224866543 |
| ENSDART00000121226 | FO704882.1        | -0.227266262 | -0.409349874 | -0.661498137 | -0.983304677 |
| ENSDART00000121457 | lbh               | -0.556077202 | -0.419617758 | -0.340252817 | -0.354555634 |
| ENSDART00000121460 | prdm8b            | -0.383342673 | -0.361617984 | -0.117709411 | 0.067402978  |
| ENSDART00000121476 | asns              | 0.135112284  | 0.218356853  | 0.383559102  | 0.26633883   |
| ENSDART00000121489 | mybl2b            | 0.480424926  | 0.360866643  | 0.136903159  | 0.039795348  |
| ENSDART00000121496 | gpr153            | -0.22286471  | -0.331603234 | -0.24476212  | -0.082544732 |
| ENSDART00000121503 | cplx3b            | -0.427974445 | -0.393867199 | -0.470572672 | -0.340193244 |
| ENSDART00000121531 | mat2aa            | 0.194654747  | 0.17321442   | 0.334936873  | 0.070313151  |
| ENSDART00000121545 | brms1             | -0.198338884 | -0.120854433 | -0.325603911 | -0.103470514 |
| ENSDART00000121598 | phf10             | -0.237213765 | -0.309795055 | -0.326418269 | -0.213703564 |
| ENSDART00000121647 | PRMT8 (1 of many) | 0.693543627  | 0.209410281  | 0.412670468  | 0.652513913  |
| ENSDART00000121675 | angptl1a          | -0.785726694 | -0.739578659 | -0.711456    | -1.277545302 |
| ENSDART00000121684 | nat8l             | -0.712971152 | -0.758652511 | -0.423007329 | -0.36098028  |
| ENSDART00000121708 | pcsk1nl           | -0.536353064 | -0.421583117 | -0.086670577 | -0.06684806  |
| ENSDART00000121714 | gnptab            | 0.326534887  | 0.246690992  | 0.1944971    | 0.101206309  |
| ENSDART00000121716 | FAM107A           | -0.353665396 | -0.22740498  | -0.416694229 | -0.314761483 |
| ENSDART00000121722 | si:dkey-274m17.3  | -0.27733184  | -0.305292621 | -0.626644892 | -0.318061843 |
| ENSDART00000121731 |                   | -0.190786213 | -0.244913354 | -0.339998812 | -0.082783766 |
| ENSDART00000121756 | sybu              | -0.180478431 | -0.141687617 | -0.791670055 | -0.226701204 |
| ENSDART00000121817 | fbln7             | 0.143978228  | 0.156275351  | -0.420940219 | -1.064416584 |
| ENSDART00000121822 |                   | 0.766367421  | 1.508595661  | 1.280597751  | 1.015709274  |
| ENSDART00000121823 | syng3b            | -0.148548395 | -0.252198032 | -0.105567779 | 0.074385745  |
| ENSDART00000121826 | bean1             | -0.425046714 | -0.600778843 | -0.413029577 | -0.180932047 |
| ENSDART00000121837 | efs               | 0.29165502   | 0.378275961  | 0.750399498  | 0.505660243  |
| ENSDART00000121861 | prph              | 1.238160677  | 2.697856064  | 2.616616233  | 2.213149799  |
| ENSDART00000121864 | slc27a6           | -0.486568844 | -0.183000547 | -0.356047466 | -0.257017832 |
| ENSDART00000121866 | desi1b            | 0.626366318  | 0.579237123  | 0.318409588  | -0.099655493 |
| ENSDART00000121867 | eif3c             | 0.151751793  | 0.171944002  | 0.307946358  | 0.118389215  |
| ENSDART00000121872 | mast3b            | -0.277342703 | -0.556828614 | -0.261994844 | -0.168334337 |
| ENSDART00000121874 | nfasca            | -0.536181619 | -0.366142839 | -0.19557692  | -0.058427118 |
| ENSDART00000121886 | hdr               | 3.187835864  | 3.220765325  | 3.322516101  | 2.611876044  |
| ENSDART00000121913 | kctd12b           | -0.424186634 | -0.205906213 | -0.149727383 | -0.132895958 |
| ENSDART00000121952 | h2afy2            | -0.217094069 | -0.401231455 | -0.429907398 | -0.128476741 |

|                    |                   |              |              |              |              |
|--------------------|-------------------|--------------|--------------|--------------|--------------|
| ENSDART00000121981 | smarce1           | 0.060968412  | 0.140256121  | 0.341840216  | 0.044607056  |
| ENSDART00000121984 | ssbp3b            | -0.092095029 | 0.005321722  | 0.831022729  | 0.629434393  |
| ENSDART00000121989 | cald1b            | -0.204161416 | -0.080240225 | -0.306263705 | -1.232197212 |
| ENSDART00000121998 | grwd1             | 0.591308312  | 0.087252775  | -0.045976929 | -0.167650618 |
| ENSDART00000122015 | fam169ab          | -0.221722765 | -0.165161236 | -0.4562862   | -0.136486601 |
| ENSDART00000122037 | rbfox1            | -0.419101241 | -0.392215043 | 0.102043249  | 0.360818016  |
| ENSDART00000122041 | nrcama            | -0.49531831  | -0.707479994 | -0.094699246 | 0.009754423  |
| ENSDART00000122059 | scoca             | -0.009226259 | -0.04540809  | -0.349436614 | -0.115738429 |
| ENSDART00000122074 | slc1a7b           | -0.35845108  | -0.359766371 | -0.277402725 | -0.101652869 |
| ENSDART00000122081 | sybu              | -0.707212841 | -0.524661917 | -0.600466578 | -0.221891711 |
| ENSDART00000122099 | dynll2a           | -0.463212519 | -0.169502826 | -0.013591394 | 0.001709702  |
| ENSDART00000122101 | tbx2b             | -0.056468629 | 0.017248499  | 0.19422425   | 0.382938949  |
| ENSDART00000122102 | wee1              | 1.082199278  | 1.291191801  | 0.972164457  | 0.241130696  |
| ENSDART00000122115 | si:ch211-153j24.3 | -1.030489347 | -0.968888956 | -1.068398619 | -1.338359032 |
| ENSDART00000122133 | mkrn2os.1         | 0.117189294  | 0.106487037  | 0.442579902  | 0.198380082  |
| ENSDART00000122159 | si:dkey-118k5.3   | 0.43932377   | 0.244452571  | 0.265050848  | -0.163246789 |
| ENSDART00000122170 | smc5              | 0.002327719  | -0.01045929  | 0.55091638   | 0.063311494  |
| ENSDART00000122238 | tyr               | 1.0676401    | 0.617097515  | 0.165901971  | -0.685666733 |
| ENSDART00000122288 | ctsla             | 0.76727009   | 0.372627978  | 0.369896487  | -0.200637952 |
| ENSDART00000122305 | Metazoa_SRP       | 1.452964427  | 1.874874084  | 1.874716847  | 1.224958179  |
| ENSDART00000122307 | gcsha             | -0.027923504 | -0.123933497 | -0.256124703 | -0.163875624 |
| ENSDART00000122321 | slc33a1           | 0.868257035  | 0.839034235  | 0.725290511  | 0.201428784  |
| ENSDART00000122348 | gad1b             | -0.426563629 | -0.260162283 | -0.435212228 | -0.267475156 |
| ENSDART00000122359 | si:dkey-164f24.2  | -0.316246733 | -0.171154186 | -0.508268616 | -0.361228089 |
| ENSDART00000122389 | elmod1            | -0.62893484  | -0.673357812 | -0.159560027 | 0.32261476   |
| ENSDART00000122407 | cdk1              | 1.677931921  | 1.534655447  | 0.824563588  | 0.384011667  |
| ENSDART00000122429 | klf15             | -0.341190152 | -0.616050077 | -0.578895446 | -0.337948098 |
| ENSDART00000122433 | trim33l           | 0.38510745   | 0.766516023  | 0.671400212  | 0.185347257  |
| ENSDART00000122439 | si:dkey-238d18.4  | 0.670270269  | 0.479235347  | 0.13889457   | -0.356907703 |
| ENSDART00000122454 | citb              | -0.619522503 | -1.363556906 | -0.83905374  | -0.294671991 |
| ENSDART00000122519 | st8sia6           | -0.258839848 | -0.191246071 | -0.329756561 | -0.383108642 |
| ENSDART00000122564 | trmt10a           | 0.324659997  | 0.317173694  | 0.413928399  | 0.18195893   |
| ENSDART00000122566 | mxs               | -0.032262098 | -0.382486532 | 3.249286652  | -1.622639363 |
| ENSDART00000122574 | ppp1r3aa          | -0.153287429 | -0.684598529 | 0.022675976  | 0.569399664  |
| ENSDART00000122601 | pgam1b            | -0.261329131 | -0.223010936 | -0.252995896 | -0.069406148 |
| ENSDART00000122605 | atxn7l1           | -0.290852975 | -0.415130691 | -0.145082777 | -0.005809908 |
| ENSDART00000122617 | si:ch211-24o10.6  | -0.23677423  | -0.709531228 | 3.09570127   | -0.222670409 |
| ENSDART00000122628 | junba             | 0.280813702  | 0.583374691  | 0.41181471   | 0.073998168  |
| ENSDART00000122632 | si:ch211-173d10.4 | -0.251574462 | -0.294229692 | -0.256969485 | -0.062618481 |
| ENSDART00000122654 | rnd1a             | -0.834540827 | -0.662552714 | -0.915729348 | -0.640521788 |
| ENSDART00000122665 | mta3              | -0.481842523 | -0.542700403 | 0.031188286  | 0.042011127  |
| ENSDART00000122681 | CR848841.1        | 0.726082565  | 1.593466942  | 1.807590182  | 1.450515621  |
| ENSDART00000122682 | cabp1b            | -0.294760944 | -0.547217913 | -0.530251845 | -0.289128709 |
| ENSDART00000122692 | CABZ01112317.1    | 0.655801165  | 0.399271741  | 0.354973485  | -0.117162708 |
| ENSDART00000122696 | hnrnpub           | 0.216889898  | 0.1794005    | 0.293328342  | 0.140752076  |
| ENSDART00000122700 | tenm3             | 0.157516404  | 0.267363723  | 0.981020214  | 1.113087141  |
| ENSDART00000122716 | PDE1C             | -0.224024171 | -0.483764938 | -0.500061121 | -0.40054702  |
| ENSDART00000122742 | rorcb             | -0.773981248 | 0.298893511  | 0.803866913  | 0.643975269  |
| ENSDART00000122747 | tmem30aa          | -0.229416393 | -0.299526834 | -0.201671762 | -0.059032826 |
| ENSDART00000122768 | CU984579.1        | 0.668419525  | 0.524624014  | 0.112892825  | -0.531459653 |
| ENSDART00000122796 | rgl3a             | -0.364392925 | -0.529093083 | -0.585369163 | -0.370045273 |

|                    |                    |              |              |              |              |
|--------------------|--------------------|--------------|--------------|--------------|--------------|
| ENSDART00000122803 | usp9               | 0.139967851  | 0.094990222  | 0.369664537  | 0.232490119  |
| ENSDART00000122829 | pik3r1             | -0.369164024 | -0.336790822 | -0.454949598 | -0.226248156 |
| ENSDART00000122863 | ptgs1              | -0.31160045  | -0.175184364 | -0.407394512 | -0.554967944 |
| ENSDART00000122889 | myhz1.3            | 0.065159767  | 3.686062072  | 4.139837605  | 2.765333679  |
| ENSDART00000122891 | tmem97             | 0.209697033  | 0.237651064  | 0.43725776   | 0.414256644  |
| ENSDART00000122898 | phf21b             | 0.630758244  | -0.049111481 | 0.173874589  | 0.290793166  |
| ENSDART00000122905 | rac3b              | -0.501948401 | -0.363291367 | -0.120049924 | 0.166932504  |
| ENSDART00000122924 | CABZ01089151.1     | 0.66835416   | 0.574150269  | 1.297855118  | 0.40982894   |
| ENSDART00000122929 | bbs4               | -0.14534671  | -0.308002271 | -0.496501405 | -0.252523436 |
| ENSDART00000122930 | scg3               | -0.159257317 | -0.25593578  | -0.408715103 | -0.119340458 |
| ENSDART00000122945 | noc2l              | 0.680401135  | 0.443128484  | 0.389864365  | 0.196289408  |
| ENSDART00000122953 | gnl3               | 0.534095037  | 0.261409226  | 0.267291075  | 0.063642911  |
| ENSDART00000122966 | hapln1a            | -5.328261829 | -0.041096146 | -1.913311737 | -3.425165696 |
| ENSDART00000123002 | nme4               | 3.640965481  | 3.577167408  | 3.045307609  | 2.652336979  |
| ENSDART00000123040 | pfkpb              | -0.26169445  | -0.241526904 | -0.415842652 | -0.206785479 |
| ENSDART00000123063 | fgf18a             | 0.196370642  | 0.632761225  | 0.668396752  | 0.413800422  |
| ENSDART00000123081 | zgc:173552         | 0.884992881  | 1.080371934  | 1.302685665  | 0.777637365  |
| ENSDART00000123096 | marcksa            | 1.85087225   | 2.605359702  | 2.620602183  | 2.013819083  |
| ENSDART00000123117 | ggh                | 0.485870455  | 0.424307993  | 0.067357919  | -0.14640404  |
| ENSDART00000123136 | FP236812.4         | 0.346817394  | 0.374427758  | 0.928731714  | 0.426600457  |
| ENSDART00000123152 | cpeb4a             | -0.291020391 | -0.445618867 | -0.40169983  | -0.306227449 |
| ENSDART00000123203 | vbp1               | 0.24089733   | 0.440645383  | 0.41864886   | 0.239214051  |
| ENSDART00000123254 | dpp9               | 0.199548032  | 0.283576523  | 0.332661933  | 0.196698648  |
| ENSDART00000123263 | phf20a             | 3.204242437  | 4.684552705  | 5.028378766  | 3.758919167  |
| ENSDART00000123278 | pikfyve            | 0.216525391  | 0.503566219  | -0.050873981 | 0.098099496  |
| ENSDART00000123282 | si:dkey-7i4.1      | -0.131885839 | -0.288104676 | -0.328002164 | -0.299371464 |
| ENSDART00000123338 | kif3a              | 0.128582487  | 0.488909245  | 0.490973182  | 0.361344362  |
| ENSDART00000123350 | sptlc2a            | 0.577620333  | 0.063030792  | -0.107114764 | -0.718762785 |
| ENSDART00000123359 | nlg1               | -0.188766802 | -0.577714477 | -0.350080443 | 0.032932651  |
| ENSDART00000123360 | susd5              | -0.191753051 | -0.73208098  | -0.853142314 | -0.526763596 |
| ENSDART00000123364 | vegfa              | 0.24629132   | 0.079711009  | -0.059768872 | -0.046839233 |
| ENSDART00000123380 | KCNIP4             | -0.549899676 | -0.507571644 | -0.455586059 | -0.106289449 |
| ENSDART00000123381 | si:ch211-117k10.3  | -0.057115592 | -0.184208007 | -0.285329447 | -0.136081942 |
| ENSDART00000123392 | rab11bb            | -0.044482336 | 0.125801068  | 0.511028514  | 0.477170112  |
| ENSDART00000123407 | pdzd7b             | -0.257572727 | -0.396050586 | -0.283495799 | -0.108489618 |
| ENSDART00000123409 | si:ch1073-296d18.1 | 0.174260872  | 0.155958113  | 0.452524339  | -0.02334577  |
| ENSDART00000123450 | KCNB2 (1 of many)  | -0.271043423 | -0.632402343 | -0.828557597 | -0.168958818 |
| ENSDART00000123473 | Metazoa_SRP        | 0.899034068  | 1.683872421  | 0.662894374  | -0.48789514  |
| ENSDART00000123479 |                    | -0.276038029 | -0.380729607 | -0.780200096 | -0.278407445 |
| ENSDART00000123505 | rab11fip4a         | -0.154164113 | -0.404988879 | -0.479622862 | -0.179766383 |
| ENSDART00000123506 | si:dkeyp-115e12.6  | 0.611372618  | 1.198993764  | 1.526686816  | 0.680010003  |
| ENSDART00000123518 | tuba1b             | 0.343846477  | 0.74266829   | 1.086564506  | 0.883480954  |
| ENSDART00000123519 | ube2e1             | 0.178513765  | 0.355426845  | 0.339753979  | 0.0793807    |
| ENSDART00000123534 | cacna1g            | -0.255311686 | -0.53660486  | -0.469326401 | -0.279013734 |
| ENSDART00000123544 | tex2               | 0.532623113  | 0.735572961  | 0.212010938  | -0.135781649 |
| ENSDART00000123559 | znf521             | 1.710422257  | 2.255410725  | 1.850379402  | 0.814044199  |
| ENSDART00000123568 | pmela              | 0.634272858  | 0.294790377  | -0.243906899 | -1.030971827 |
| ENSDART00000123590 | si:ch211-91p5.3    | 0.174508046  | -0.021173312 | 0.906803099  | -0.35666968  |
| ENSDART00000123607 | cyfip2             | 0.234079405  | 0.294840867  | 0.917405124  | 0.783474958  |
| ENSDART00000123634 | CABZ01076616.1     | -0.026473104 | -0.096132504 | -0.342132107 | -0.122009843 |
| ENSDART00000123648 | pcdh1a3            | -0.182322903 | 0.28663259   | 1.138716215  | 1.048655391  |

|                    |                      |              |              |              |              |
|--------------------|----------------------|--------------|--------------|--------------|--------------|
| ENSDART00000123713 | gria1b               | -0.296227004 | -0.446226017 | -0.161357303 | 0.142828716  |
| ENSDART00000123797 | pcp4b                | -0.598256523 | -0.489822031 | -0.568163011 | -0.081816834 |
| ENSDART00000123820 | tmem135              | -0.104475369 | -0.143585965 | -0.370543783 | -0.122253976 |
| ENSDART00000123834 | exoc7                | 0.170713952  | 0.17934497   | 0.358341658  | 0.328688768  |
| ENSDART00000123839 | arrb1                | -0.44263739  | -0.489445552 | -0.281663489 | 0.083496974  |
| ENSDART00000123844 | si:dkey-77f5.3       | -4.277427291 | -0.495308507 | -0.670171681 | -0.698447042 |
| ENSDART00000123851 | fut8b                | -0.379186004 | -0.673089848 | -0.195485297 | 0.141395943  |
| ENSDART00000123868 | dthd1                | -0.700427011 | -0.013611963 | -0.073941373 | -0.012612052 |
| ENSDART00000123878 | ppiaa                | 0.40248836   | 0.711363911  | 0.687992513  | 0.279031014  |
| ENSDART00000123887 | MAPK8IP1 (1 of many) | -0.420573616 | -0.373470966 | -0.247368538 | -0.089797668 |
| ENSDART00000123917 | tmem47               | -0.036122446 | 0.257386953  | 0.324417161  | 0.235522978  |
| ENSDART00000123950 | PRIMA1               | -0.578840887 | -0.634067967 | -0.550475282 | -0.159964437 |
| ENSDART00000123966 | chrng                | 1.138454485  | 1.750205793  | 1.604781052  | 0.687837172  |
| ENSDART00000123970 | mntb                 | -0.115861458 | -0.101461538 | -0.360694649 | -0.01567692  |
| ENSDART00000123972 | smarca5              | 0.189313952  | 0.223635359  | 0.34449924   | 0.204975788  |
| ENSDART00000123999 | SLC27A2 (1 of many)  | -1.114337124 | -0.48467376  | -0.495436914 | -0.504796953 |
| ENSDART00000124040 | insm1a               | 0.50962443   | 1.551047216  | 1.738068624  | 1.104992333  |
| ENSDART00000124075 | mtss1lb              | -0.362597648 | -0.323844879 | 0.066492818  | 0.131710049  |
| ENSDART00000124085 | usp18                | 0.058285571  | 0.001224867  | 0.967078356  | -0.263223461 |
| ENSDART00000124112 | pou4f2               | -1.368026557 | -1.308261738 | 0.344262724  | 0.908586045  |
| ENSDART00000124140 | zgc:101566           | -0.242404826 | -0.290163127 | -0.636219456 | -0.416307006 |
| ENSDART00000124176 | gfpt1                | 0.432149516  | 0.480766327  | 0.474022237  | 0.242457652  |
| ENSDART00000124179 | hist1h4l             | 0.531035238  | 0.617056656  | 0.928084772  | 0.625350282  |
| ENSDART00000124217 | map1sb               | -0.319538816 | -0.066329928 | 0.070606275  | 0.217460247  |
| ENSDART00000124220 | nptxrb               | -0.324541852 | -0.000122151 | 0.687818829  | 0.894343302  |
| ENSDART00000124242 | lamp2                | 0.063109036  | 0.101381463  | -0.092849158 | -0.275072982 |
| ENSDART00000124244 | rtn3                 | -0.261781297 | -0.269593684 | -0.376187628 | -0.121031259 |
| ENSDART00000124290 | MFN1                 | -0.108610875 | -0.185612855 | -0.471855683 | -0.083062873 |
| ENSDART00000124298 | klhl29               | -0.069964723 | -0.409007114 | -0.117673983 | 0.023652831  |
| ENSDART00000124300 | rhoab                | 0.400265647  | 0.097339191  | -0.031332977 | -0.120716407 |
| ENSDART00000124306 |                      | 0.869134686  | 1.333529821  | 1.120901364  | 0.868931063  |
| ENSDART00000124327 | havcr2               | 0.988496388  | 0.35234238   | 0.213092908  | 0.061810802  |
| ENSDART00000124329 | cbx8a                | -0.13552578  | -0.23364206  | -0.31740894  | -0.19855692  |
| ENSDART00000124331 | si:ch1073-174d20.1   | -0.948877018 | -0.570444361 | 0.133772468  | 0.53293925   |
| ENSDART00000124333 | adcy5                | -0.349730091 | -0.163331233 | -0.158561989 | -0.605303683 |
| ENSDART00000124335 | smim4                | -0.115055175 | -0.371982424 | -0.338416379 | -0.248500803 |
| ENSDART00000124346 | fn1a                 | 1.458758212  | 2.264590948  | 2.662817487  | 2.142590168  |
| ENSDART00000124367 | si:cabz01074946.1    | 1.457343255  | 1.182560392  | 0.713827232  | 0.020183118  |
| ENSDART00000124439 | cpn1                 | 0.590321112  | 0.454790314  | -0.048032667 | -0.505920429 |
| ENSDART00000124440 | CABZ01029822.1       | 0.125194338  | 0.049659662  | 0.670452016  | 0.712162088  |
| ENSDART00000124455 | fbxl15               | -0.435034118 | -0.27455581  | -0.042060966 | 0.121857574  |
| ENSDART00000124480 | adgrl1a              | -0.174945207 | -0.479872966 | -0.185768365 | 0.06038548   |
| ENSDART00000124485 | pcdh2ab8             | 0.093884444  | 0.182265582  | 0.466276394  | 0.290720698  |
| ENSDART00000124499 | hpvt1                | 0.192517236  | 0.178234353  | 0.277835111  | 0.149971609  |
| ENSDART00000124534 | mbnl2                | -0.407254222 | 0.078580914  | -0.044925118 | 0.120266311  |
| ENSDART00000124562 | zgc:152977           | -0.424781995 | -0.464146326 | -0.707134675 | -0.367623104 |
| ENSDART00000124563 |                      | 3.317882457  | 3.087315331  | 3.467692067  | 2.846513731  |
| ENSDART00000124582 | napbb                | -0.403034353 | -0.312472409 | -0.341096083 | -0.127811116 |
| ENSDART00000124653 | dhrrs4               | 0.898977368  | 0.567421347  | 0.389421075  | 0.098869507  |
| ENSDART00000124660 | ascc3                | 0.285037378  | 0.269547515  | 0.334772964  | 0.241795126  |
| ENSDART00000124662 | rtn4a                | -0.503868889 | -0.627866078 | -0.609450822 | -0.190620657 |

|                    |                  |              |              |              |              |
|--------------------|------------------|--------------|--------------|--------------|--------------|
| ENSDART00000124663 | npc2             | 1.578129482  | 0.684715762  | 0.389649636  | 0.031719264  |
| ENSDART00000124676 | sv2ba            | -0.120324523 | -0.401787287 | -0.561843381 | -0.191682717 |
| ENSDART00000124708 | gabra6b          | -0.347504052 | -0.445856563 | -0.426704654 | -0.236544239 |
| ENSDART00000124710 | dlg5a            | -0.356924394 | -0.265850728 | -0.130233283 | 0.096340819  |
| ENSDART00000124716 | si:dkeyp-121d4.3 | 0.246129368  | 0.104493361  | 0.091668358  | 0.120636876  |
| ENSDART00000124748 | b2ml             | -0.109461573 | -0.036064969 | -0.083861942 | -0.342769695 |
| ENSDART00000124751 | kcnip3b          | -1.29606503  | -1.383048631 | -0.490749215 | -0.039127508 |
| ENSDART00000124762 | hsp70.1          | -0.061931986 | -0.652822267 | -0.746588848 | -0.837604985 |
| ENSDART00000124773 | ppid             | 0.236087087  | 0.322094513  | 0.445941037  | 0.285911702  |
| ENSDART00000124800 | fam212aa         | -0.670414346 | -0.372526126 | -0.229531445 | -0.379904435 |
| ENSDART00000124809 | acsbg2           | 0.494562304  | 1.915512609  | 1.979085784  | 0.982887956  |
| ENSDART00000124827 | lgi2a            | -0.389885576 | -0.462014195 | -0.106597692 | 0.145509175  |
| ENSDART00000124833 | pdcd11           | 0.337926893  | 0.21951318   | 0.267537583  | 0.067942864  |
| ENSDART00000124843 | mtss1la          | -0.820086229 | 0.028014444  | 0.433717014  | 0.003181165  |
| ENSDART00000124868 | lpl              | 0.342987533  | -0.032282276 | -0.168396519 | -1.276175937 |
| ENSDART00000124876 | VSTM2B           | -0.453041699 | -0.513162057 | -0.416504873 | -0.137923272 |
| ENSDART00000124925 | si:ch211-235e9.8 | -0.615429137 | -1.514463249 | -0.238786067 | 0.039474733  |
| ENSDART00000124945 | ubap1lb          | 0.21207026   | -0.004652141 | -0.773302877 | -0.344881822 |
| ENSDART00000124963 | pkig             | 0.251389387  | 0.584439023  | 0.334726577  | 0.10933368   |
| ENSDART00000124968 | rpn2             | 0.26137974   | 0.104649464  | 0.042914045  | -0.061671941 |
| ENSDART00000124991 | lmcd1            | 2.103120162  | 2.716646733  | 2.223480288  | 1.685964001  |
| ENSDART00000124998 | rtn2a            | 0.520408534  | 1.345034307  | 1.147677305  | 0.715797789  |
| ENSDART00000125019 | dhcr24           | -0.273134055 | -0.003097208 | 0.45273437   | 0.079225052  |
| ENSDART00000125039 | six6b            | -0.391804698 | -0.26201342  | -0.503562642 | -0.356304334 |
| ENSDART00000125045 | dscama           | -0.36310557  | -0.486996676 | -0.080151729 | 0.074065642  |
| ENSDART00000125058 | nipsnap3a        | 0.560274837  | 0.34716726   | 0.187463486  | 0.300128027  |
| ENSDART00000125074 | kcnab2b          | -0.745923366 | -1.091983107 | -0.420367552 | 0.000775062  |
| ENSDART00000125097 | si:dkey-126g1.7  | 0.825737488  | 0.388125468  | -0.092297047 | -0.324389582 |
| ENSDART00000125116 | tnfaip8l3        | -0.29259694  | -0.291950956 | -0.382018775 | -0.337072666 |
| ENSDART00000125174 | nr1i2            | -0.056601149 | -0.085618729 | -0.264588441 | -0.326132843 |
| ENSDART00000125178 | eif5a            | 0.322397945  | 0.394023524  | 0.161340886  | -0.011483865 |
| ENSDART00000125203 | hopx             | 0.434700645  | 0.383648473  | 0.145485294  | -0.121364202 |
| ENSDART00000125281 | ngfra            | -0.140591626 | 0.234351775  | 0.618758909  | 0.552257695  |
| ENSDART00000125284 | nlgn2a           | -0.210046545 | -0.366872132 | 0.090424981  | 0.163948503  |
| ENSDART00000125299 | plk2a            | -0.143584568 | -0.170521478 | -0.297471862 | -0.183865098 |
| ENSDART00000125302 | fbn2b            | 0.974537401  | 0.789475875  | 1.035854452  | 0.178462064  |
| ENSDART00000125344 | skilb            | -0.241964121 | -0.627384358 | -0.493621211 | -0.368838752 |
| ENSDART00000125348 | id2b             | -0.501394328 | 0.114793842  | 0.840457629  | 0.257023029  |
| ENSDART00000125349 | bada             | 0.528966306  | 1.266997252  | 1.043776037  | 0.694034948  |
| ENSDART00000125371 | mknk1            | 0.126961076  | 0.659607681  | 0.524109906  | -0.03336174  |
| ENSDART00000125381 | gig2o            | 0.334408908  | 0.020553966  | 0.877629524  | -0.325957124 |
| ENSDART00000125397 | kri1             | -0.318299605 | -0.278223015 | -0.439932558 | -0.332258967 |
| ENSDART00000125430 | pprc1            | 1.538620876  | 1.109491459  | 0.874206496  | 0.220876028  |
| ENSDART00000125432 | esrrd            | -0.825323711 | -0.251243419 | -0.11920169  | -0.154136212 |
| ENSDART00000125440 | hist1h4l         | 0.76925705   | 0.664322574  | 0.48261672   | 0.298833148  |
| ENSDART00000125450 | gpc1a            | -0.40101998  | -0.317779496 | 0.568583174  | 0.472068591  |
| ENSDART00000125466 | alpi.2           | -0.05537717  | -0.356245119 | -0.658920603 | -0.289506352 |
| ENSDART00000125468 | apodb            | 0.705398759  | 0.818661135  | 1.046059167  | 0.463604749  |
| ENSDART00000125472 | dnmt3bb.3        | 2.081331813  | 1.555687378  | 1.386584326  | 1.824843519  |
| ENSDART00000125531 | plppr5a          | -0.485992962 | -0.468686144 | -0.487868254 | -0.311270154 |
| ENSDART00000125536 | appb             | -0.473539223 | -0.363304525 | 0.075744005  | 0.226987466  |

|                    |                 |              |              |              |              |
|--------------------|-----------------|--------------|--------------|--------------|--------------|
| ENSDART00000125561 | atp6ap2         | -0.203601896 | -0.343976801 | -0.371684174 | -0.265876436 |
| ENSDART00000125563 | homer3b         | -0.366344126 | -0.72350131  | -0.2232749   | 0.112901448  |
| ENSDART00000125590 | adam22          | -0.13203003  | 0.438612977  | 0.776065364  | 0.829224171  |
| ENSDART00000125594 | zgc:194312      | 0.282121707  | 0.314684279  | 0.206211766  | 0.077189618  |
| ENSDART00000125617 | smoc1           | -0.728822769 | -0.318137722 | -0.435938883 | -0.283225846 |
| ENSDART00000125619 | thop1           | -0.701072314 | 0.174567303  | -0.277028493 | 0.035731797  |
| ENSDART00000125638 | tbx5b           | -0.961612456 | -0.494056529 | -0.317150736 | -0.11065371  |
| ENSDART00000125674 | pcdh2ab9        | 0.154453003  | 0.05176964   | 0.233264506  | 0.354320756  |
| ENSDART00000125691 | sntb1           | -0.296403963 | -0.433378655 | -0.538134366 | -0.484556917 |
| ENSDART00000125733 | chst1           | -1.779723555 | -0.640531075 | -0.420086911 | -0.327548455 |
| ENSDART00000125753 | rpl22           | 0.364344172  | 0.362576681  | 0.16140506   | -0.121749389 |
| ENSDART00000125759 | si:dkey-22o12.2 | -0.433356276 | -0.386370833 | -0.195481295 | -0.118191078 |
| ENSDART00000125766 | camkvb          | -0.518737667 | -0.560273381 | -0.364168693 | -0.104855004 |
| ENSDART00000125767 | metap2a         | -0.473789427 | -0.340839673 | -0.148249289 | -0.006647252 |
| ENSDART00000125824 | tmem198a        | -0.201432593 | -0.312524143 | -0.133551129 | -0.103080035 |
| ENSDART00000125835 | si:dkey-16p6.1  | 0.273905491  | 0.038923635  | 0.125549673  | 0.126712455  |
| ENSDART00000125864 | camkk1b         | -0.169636507 | -0.512096721 | -0.591294824 | -0.14296099  |
| ENSDART00000125900 | hs3st3b1b       | -0.2288214   | -0.294028167 | -0.23141286  | 0.023426889  |
| ENSDART00000125923 | cxcl14          | -0.090480689 | -0.043715373 | -0.409912244 | -0.49269465  |
| ENSDART00000125925 | tead1a          | 0.393334189  | 0.562637179  | 0.380089957  | 0.085328359  |
| ENSDART00000125971 | gpc1b           | 0.246742539  | 0.417837609  | 0.415208578  | 0.061504531  |
| ENSDART00000125979 | tshz3a          | -0.321412605 | -0.323547538 | -0.394821529 | -0.291421679 |
| ENSDART00000126005 | efna5a          | -0.170916    | 0.110640262  | 0.306287547  | 0.169125563  |
| ENSDART00000126022 | rarab           | -0.000236754 | 0.039022735  | 0.1518943    | 0.316882235  |
| ENSDART00000126029 | dhx58           | 0.173247162  | -0.097510604 | 2.186112068  | 0.050096401  |
| ENSDART00000126038 | tcp1            | 0.327351769  | 0.30721299   | 0.45795341   | 0.229539742  |
| ENSDART00000126041 | ano10a          | 0.295415156  | 0.394412522  | 0.244334431  | 0.10037004   |
| ENSDART00000126044 | FO904898.3      | 0.246202383  | 0.067501502  | -0.306505539 | -0.628858511 |
| ENSDART00000126076 |                 | -0.016912473 | -0.350302068 | -0.401962349 | -0.001679825 |
| ENSDART00000126084 | ctdSpl3         | -0.310396194 | -0.278185547 | -0.408791973 | -0.234117517 |
| ENSDART00000126092 | irs4a           | -0.078713301 | -0.053650022 | 0.329231719  | 0.37127028   |
| ENSDART00000126148 | zmp:0000000912  | 0.164571908  | 0.167838799  | 1.993878391  | 0.463546785  |
| ENSDART00000126172 | fn1b            | 1.985622531  | 1.85759146   | 1.646183965  | 1.167188621  |
| ENSDART00000126196 | gucy2f          | -0.393875584 | -0.283587572 | -0.315272826 | -0.060630266 |
| ENSDART00000126198 | lrrfip1a        | 0.470310797  | 0.07807124   | -0.268319723 | -0.389271494 |
| ENSDART00000126205 | st6gal1         | -0.371204022 | -0.447413159 | -0.30616801  | 0.05897999   |
| ENSDART00000126229 | rps7            | 0.396514179  | 0.373862291  | 0.136780142  | -0.080022773 |
| ENSDART00000126253 | fam124b         | -0.802465606 | 0.105938283  | 0.208441414  | 0.082147827  |
| ENSDART00000126259 | zgc:110434      | 0.950260296  | 1.108697637  | 1.201811754  | 0.695021733  |
| ENSDART00000126260 | anxa6           | 0.678382414  | 0.731151807  | 0.839317026  | 0.481712468  |
| ENSDART00000126282 | nr1d1           | -0.1014969   | -0.191656676 | -0.494430716 | -0.13667305  |
| ENSDART00000126299 | gdi1            | -0.113565456 | 0.226089497  | 0.711067572  | 0.636383115  |
| ENSDART00000126300 | shisa8b         | -0.373408846 | -0.464508355 | -0.412634146 | -0.258826308 |
| ENSDART00000126301 | prkab1b         | 0.061924737  | -0.091377696 | -0.203476199 | -0.507302968 |
| ENSDART00000126314 | pcdh8           | -0.25826413  | -0.454008614 | -0.231067015 | -0.062706758 |
| ENSDART00000126397 | tspan4a         | -0.347274376 | -0.217924211 | -0.29861217  | -0.115670743 |
| ENSDART00000126414 | eml1            | 0.475872706  | 0.625227433  | 0.675164018  | 0.217118522  |
| ENSDART00000126417 | bri3            | 0.500014173  | 0.414528928  | 0.11265957   | -0.17961569  |
| ENSDART00000126444 | mmp13a          | 0.046684026  | 3.040517608  | 1.846123489  | -1.625378496 |
| ENSDART00000126460 | il34            | 0.203388167  | 0.052375422  | -0.136564829 | -0.587275531 |
| ENSDART00000126470 | zgc:85777       | 0.313383122  | 0.223125376  | -0.098199946 | -0.16516057  |



|                    |                     |              |              |              |              |
|--------------------|---------------------|--------------|--------------|--------------|--------------|
| ENSDART00000126474 | si:ch211-265o23.1   | 1.117262816  | 1.407297939  | 1.180818753  | 0.875131455  |
| ENSDART00000126542 | ppp1r14ba           | 0.329398236  | 1.23193061   | 1.655895613  | 1.416335991  |
| ENSDART00000126559 | rap1gap2a           | -0.313212246 | -0.347504992 | -0.446138134 | -0.231468434 |
| ENSDART00000126565 | si:ch211-150g13.3   | -0.477986184 | -0.41948879  | 0.219835784  | 0.507153945  |
| ENSDART00000126578 | si:ch211-200e2.1    | -0.112922065 | -0.175836986 | -0.289153296 | -0.021149659 |
| ENSDART00000126588 | rac3a               | -0.258496234 | 0.207987177  | 0.575325222  | 0.581016326  |
| ENSDART00000126621 | pfdn1               | 0.222765458  | 0.317529573  | 0.180735937  | 0.092770718  |
| ENSDART00000126634 | si:dkey-237m9.2     | 2.393787497  | 2.476689815  | 2.575358161  | 0.828914545  |
| ENSDART00000126640 | RHOBTB3             | -0.934122492 | -0.733675156 | -0.213973967 | -0.180952113 |
| ENSDART00000126661 | rhobtb1             | -0.165202139 | -0.331565823 | -0.522361525 | -0.299461153 |
| ENSDART00000126681 | tardbpl             | 0.019310972  | 0.344433444  | 0.212149787  | 0.045304759  |
| ENSDART00000126705 | eif3ea              | 0.116700572  | 0.376861812  | 0.239268123  | 0.089153507  |
| ENSDART00000126739 | tspan5a             | -0.28156215  | -0.24229244  | -0.35515584  | -0.059588327 |
| ENSDART00000126744 | nrg3b               | -0.484773132 | -0.477903604 | -0.212248622 | 0.011007147  |
| ENSDART00000126766 | erbb4b              | -0.378985194 | -0.566156911 | -0.016423806 | 0.214915468  |
| ENSDART00000126768 | cc2d2a              | 0.207920961  | 0.256447903  | 0.267293619  | 0.323639423  |
| ENSDART00000126780 | rnaset2             | 0.561676509  | 0.243610345  | -0.050562112 | -0.093659569 |
| ENSDART00000126826 | tmem59              | 0.0843517    | -0.210535259 | -0.365503975 | -0.184419203 |
| ENSDART00000126842 | flj11011l           | -0.120546184 | -0.161649138 | -0.295902143 | -0.182318736 |
| ENSDART00000126845 | ldb1a               | -0.250500011 | -0.460439315 | -0.246081535 | -0.230460175 |
| ENSDART00000126866 | ccser2b             | 0.139738782  | 0.390945754  | 0.269322283  | 0.164198289  |
| ENSDART00000126870 | ndufa4l2b           | -0.364506533 | -0.363911454 | -0.576856062 | -0.429052776 |
| ENSDART00000126873 | myhz2               | -2.902978535 | 4.975016398  | 5.62978424   | 4.2721239    |
| ENSDART00000126891 | sept2               | 0.631165801  | 0.418693285  | 0.081387841  | -0.156566045 |
| ENSDART00000126897 | lamtor5             | 0.078015812  | -0.030543248 | -0.309612502 | -0.278777082 |
| ENSDART00000126916 | mob2b               | 0.26836075   | -0.004670217 | -0.398977994 | -0.072830738 |
| ENSDART00000126928 | si:dkey-73n8.3      | -0.354837143 | 0.244926012  | -3.843926683 | -0.176933271 |
| ENSDART00000126945 | adgrb3              | -0.310129925 | -0.752937386 | -0.198981749 | -0.020103794 |
| ENSDART00000126963 | ucp3                | -1.126828953 | 2.695519216  | 3.149953006  | 2.002864913  |
| ENSDART00000126966 | esrrga              | -0.248566713 | -0.265310961 | -0.321308408 | -0.070523791 |
| ENSDART00000126978 | acadl               | 0.315070362  | 0.266918423  | -0.034640916 | -0.111553388 |
| ENSDART00000126979 | ubxn1               | 0.239657791  | 0.430777506  | 0.361799544  | 0.043577807  |
| ENSDART00000126991 | ascl1b              | 0.538037435  | 0.289776062  | 1.627554047  | -0.154081652 |
| ENSDART00000127009 |                     | 0.669374866  | 0.368365497  | 0.110306036  | -0.47074427  |
| ENSDART00000127015 | srrm4               | -0.1898883   | -0.282207317 | -0.262672915 | -0.106216594 |
| ENSDART00000127047 | tusc5a              | -1.04192916  | -0.556828029 | 0.377559818  | 0.604205052  |
| ENSDART00000127050 | nrxn3b              | -0.323579219 | -0.438342846 | -0.422724255 | 0.054279865  |
| ENSDART00000127062 | egr3                | -1.907539966 | -1.048685041 | -1.405658043 | -1.087307214 |
| ENSDART00000127073 | lrrc75bb            | -0.380397254 | -0.264539972 | -0.318155891 | -0.090026751 |
| ENSDART00000127093 | CR749162.1          | -1.06520168  | -0.24719149  | -0.825954556 | -0.565925266 |
| ENSDART00000127099 | nr2e3               | 0.281603482  | 0.002911001  | -0.560613973 | -0.033774044 |
| ENSDART00000127131 | mtmr10              | 0.05904867   | -0.240178    | -0.607174209 | -0.120957306 |
| ENSDART00000127136 | slco5a1b            | -0.145489914 | -0.411558687 | 0.007460079  | -0.021875568 |
| ENSDART00000127144 | cacna2d2a           | -0.206435603 | -0.394190367 | -0.167540436 | 0.000520565  |
| ENSDART00000127157 | hlfa                | -0.089881453 | -0.212609643 | -0.346930267 | -0.147102401 |
| ENSDART00000127162 | si:dkey-165a24.9    | -0.154532095 | -0.18408156  | -0.261561109 | -0.381673579 |
| ENSDART00000127167 | fam217b             | -0.253255723 | -0.39768374  | -0.389011868 | -0.208058743 |
| ENSDART00000127173 | clu                 | 0.051800584  | 0.063760613  | -0.14536086  | -0.386244567 |
| ENSDART00000127214 | tmtc4               | -0.125359905 | 0.4024138    | 0.47318852   | 0.32908352   |
| ENSDART00000127216 | fam161a             | -0.082566753 | -0.243407902 | -0.44855597  | -0.155296925 |
| ENSDART00000127219 | FAM155A (1 of many) | -0.247003441 | -0.575960705 | -0.390291652 | -0.269667553 |

|                    |                      |              |              |              |              |
|--------------------|----------------------|--------------|--------------|--------------|--------------|
| ENSDART00000127236 | syt13                | -0.555582206 | -0.558950845 | -0.738809627 | -0.549910893 |
| ENSDART00000127239 | si:ch211-237i5.4     | -0.435620687 | -0.33667742  | 0.058425883  | -0.022982403 |
| ENSDART00000127274 | sema7a               | -0.198678021 | -0.353988759 | -0.478218296 | -0.427230313 |
| ENSDART00000127277 | pum3                 | 0.522067564  | 0.375606403  | 0.43721492   | 0.160017235  |
| ENSDART00000127286 | si:ch73-140j24.4     | -0.467040467 | -0.569237917 | -0.172853738 | 0.202142114  |
| ENSDART00000127318 | frmpd1b              | -0.135556639 | -0.245654095 | -0.299228813 | -0.069164239 |
| ENSDART00000127331 | cdc37l1              | -0.115815783 | -0.102908381 | -0.388723888 | -0.245749713 |
| ENSDART00000127350 | enpp1                | 1.121109181  | 0.817391101  | 0.578924138  | 0.065420517  |
| ENSDART00000127353 | nr1d2b               | -0.29103008  | -0.243688493 | -0.346507775 | -0.100908835 |
| ENSDART00000127355 | CR855274.1           | -1.80396628  | -1.678561981 | -0.998732969 | -1.157402562 |
| ENSDART00000127396 | ppm1lb               | -0.618109529 | -0.371965944 | 0.29932303   | 0.461142505  |
| ENSDART00000127397 | utp15                | 0.476513751  | 0.260847638  | 0.257137466  | 0.080743511  |
| ENSDART00000127398 | CR753886.1           | -0.159141993 | -0.332294072 | -0.331878243 | -0.244595408 |
| ENSDART00000127420 | MDP1                 | 1.927039626  | 2.737884833  | 2.522148059  | 1.176014094  |
| ENSDART00000127426 | ERBB4 (1 of many)    | -0.100134914 | -0.701677799 | -0.360350675 | -0.397963746 |
| ENSDART00000127428 | pe1i3                | -0.233448958 | -0.50115077  | -0.383840384 | -0.13792159  |
| ENSDART00000127467 | pygmb                | -0.413201582 | -0.432147367 | -0.560055907 | -0.134010249 |
| ENSDART00000127496 | lox1                 | 0.412088952  | 0.133411325  | -0.193765804 | -0.987510306 |
| ENSDART00000127502 | cdk15                | -0.227663486 | -0.408317592 | -0.318577534 | 0.048062851  |
| ENSDART00000127504 | trabd2a              | -0.34035671  | -0.379312956 | -0.491238318 | -0.073447564 |
| ENSDART00000127506 | si:ch73-380n15.2     | -0.654968439 | -0.466259045 | -0.336236181 | -0.320196074 |
| ENSDART00000127508 | thns12               | 0.534241071  | 0.753527133  | 0.557550473  | 0.458352807  |
| ENSDART00000127513 | znf385d              | -0.506377127 | -0.828614957 | -0.387596815 | -0.346943547 |
| ENSDART00000127536 | cbx7b                | -0.401352835 | -0.168978702 | -0.391659396 | -0.597817617 |
| ENSDART00000127568 | ankha                | -0.068226585 | -0.359480026 | -0.686453521 | -0.222767571 |
| ENSDART00000127581 | trim23               | -0.305887304 | -0.304885837 | -0.114854094 | -0.109504112 |
| ENSDART00000127654 | tagapb               | -0.160683989 | -0.122717735 | -0.284237949 | -0.235548963 |
| ENSDART00000127656 | cln6b                | -0.363769389 | -0.208045101 | -0.481848131 | -0.19203643  |
| ENSDART00000127673 | si:ch73-362m14.2     | -0.314971012 | -0.45829899  | -0.590197547 | -0.155316982 |
| ENSDART00000127693 | vps4b                | 0.2667443    | 0.328628912  | 0.300618305  | 0.02818525   |
| ENSDART00000127695 | rpl5b                | 0.469645013  | 0.524119827  | 0.418266352  | 0.096930554  |
| ENSDART00000127699 | si:ch73-335l21.4     | 1.682684641  | 2.104012275  | 1.803809975  | 0.730936452  |
| ENSDART00000127717 | FO704622.1           | 0.358399682  | 0.167598174  | 1.49594356   | -0.017716595 |
| ENSDART00000127719 | kdm6ba               | 0.187905295  | -0.040637976 | 0.338835017  | 0.306420124  |
| ENSDART00000127753 | adam15               | 0.405103987  | 0.059018909  | -0.196195339 | -0.053874543 |
| ENSDART00000127769 | plekhg7              | -0.272021337 | -0.179975164 | -0.292604049 | -0.294852391 |
| ENSDART00000127795 | tsku                 | 0.321336842  | 0.111241615  | -0.27306537  | -0.619712406 |
| ENSDART00000127834 | zeb2a                | -0.12592194  | -0.244794968 | -0.205587566 | -0.079770723 |
| ENSDART00000127854 | ccni                 | 3.365173646  | 3.708027214  | 3.915718651  | 4.117994882  |
| ENSDART00000127859 | trim63b              | 0.3316873    | 0.607011237  | 0.873528277  | 0.725631694  |
| ENSDART00000127936 | prdm2a               | -0.397627804 | -0.350024919 | -0.182979057 | 0.028300134  |
| ENSDART00000127971 | TMEM184B (1 of many) | 0.084681099  | 0.512647767  | 0.678333061  | 0.362195553  |
| ENSDART00000127974 | lrrk1                | 0.237699588  | 0.043061851  | 0.529534709  | 0.581549893  |
| ENSDART00000127977 | CABZ01016547.1       | 2.8163175    | 2.999575494  | 2.826245437  | 2.227407522  |
| ENSDART00000127981 | rgs9b                | -0.268928405 | -0.181867875 | -0.388691411 | -0.111378496 |
| ENSDART00000127982 | suox                 | 0.48894768   | 0.565232546  | 0.460591806  | 0.13079859   |
| ENSDART00000128011 | tnfsf10i3            | -0.207145482 | -0.351713028 | -0.904110327 | -0.837055548 |
| ENSDART00000128014 | dnah2                | -0.407226928 | -0.498892771 | -0.604204962 | -0.453086208 |
| ENSDART00000128024 | wdsub1               | -2.995723015 | 0.554879586  | 0.200121371  | 0.371936521  |
| ENSDART00000128049 | hunk                 | 0.851411376  | 0.241049411  | 0.130293149  | 0.977016396  |
| ENSDART00000128050 | UTP14C               | 0.741190051  | 0.667056074  | 0.681031837  | 0.432356782  |

|                    |                   |              |              |              |              |
|--------------------|-------------------|--------------|--------------|--------------|--------------|
| ENSDART00000128053 | tmem121b          | -0.393762063 | -0.457536323 | -0.455856107 | -0.077381852 |
| ENSDART00000128127 | slc38a3b          | -0.302545777 | -0.299963192 | -0.361680425 | -0.612800784 |
| ENSDART00000128149 | fam32a            | -0.07314666  | -0.18816053  | -0.368263865 | -0.361807904 |
| ENSDART00000128174 | foxp1b            | 0.060807795  | 0.283454627  | 0.694455914  | 0.748409918  |
| ENSDART00000128187 | mbnl2             | -0.194930621 | -0.139118187 | -0.302093023 | -0.22924185  |
| ENSDART00000128193 | rnf152            | 0.402113699  | 0.480129081  | 0.225745135  | 0.017035201  |
| ENSDART00000128198 | scn12aa           | -0.298887564 | -0.309751416 | -0.23551982  | -0.15404656  |
| ENSDART00000128223 | CHCHD5            | -0.405489857 | -0.5400056   | -0.416697607 | -0.210022955 |
| ENSDART00000128224 | FO904873.1        | -0.267293261 | -0.580808884 | -0.319669262 | -0.131136583 |
| ENSDART00000128226 | slc6a11b          | -0.388946235 | -0.51506191  | -0.246391039 | 0.364300065  |
| ENSDART00000128246 | polr1c            | 0.52692078   | 0.422008081  | 0.272814737  | 0.11358433   |
| ENSDART00000128247 | lsm3              | -0.046938555 | -0.089126233 | -0.195168175 | -0.315381754 |
| ENSDART00000128271 | si:dkey-114c15.7  | -0.608254547 | -0.511435956 | -0.075108717 | 0.021034155  |
| ENSDART00000128281 | cntn1a            | 0.147578203  | 0.564199709  | 0.636356286  | 0.425015924  |
| ENSDART00000128284 | nudt9             | 0.256265084  | 0.958235099  | 0.875663921  | 0.386996856  |
| ENSDART00000128302 | stk35             | -0.274652044 | -0.340334252 | -0.095489621 | 0.00314331   |
| ENSDART00000128346 | si:ch211-108c6.2  | 1.285191812  | 1.464423055  | 1.491945601  | 0.337219819  |
| ENSDART00000128350 | rad51d            | 0.854501715  | 0.522915635  | 0.508614026  | 0.238331303  |
| ENSDART00000128457 | ephb1             | 0.374973875  | 0.620484905  | 1.032855939  | 0.805207117  |
| ENSDART00000128488 | e2f8              | 3.852661131  | -0.929008264 | 3.252279997  | 2.01178299   |
| ENSDART00000128497 | nat14             | -0.333855923 | -0.175587715 | -0.007501498 | 0.001822083  |
| ENSDART00000128535 | dmbx1a            | -3.533682655 | -2.208339716 | -0.232250672 | -0.456601031 |
| ENSDART00000128550 | palb2             | 0.912196863  | 1.171643148  | 0.786370898  | 0.077481484  |
| ENSDART00000128613 | rps15a            | 0.315521947  | 0.355667698  | 0.260468714  | -0.049823228 |
| ENSDART00000128624 | sgk494a           | 0.606573335  | 0.92915728   | 0.662849036  | 0.240608511  |
| ENSDART00000128659 | pcdh2ab10         | 0.122813964  | 0.17598472   | 0.479887931  | 0.226887021  |
| ENSDART00000128673 | CABZ01078944.1    | 0.788095742  | 0.425650182  | 0.277053304  | -0.16966963  |
| ENSDART00000128681 | DYRK3             | 0.346870394  | 0.024160089  | 0.051669126  | 0.414421342  |
| ENSDART00000128690 | agap3             | -0.218144691 | -0.339443752 | 0.012538674  | 0.008782978  |
| ENSDART00000128696 | CABZ01035108.1    | -0.30766878  | -0.382099096 | -0.769557831 | -0.298631085 |
| ENSDART00000128698 | rnf34b            | -0.122706526 | -0.390373676 | -0.658840165 | -0.257572429 |
| ENSDART00000128705 | ndrg3a            | -0.684036937 | -0.148509308 | 0.416765356  | 0.500717941  |
| ENSDART00000128715 | kif3cb            | 0.538226215  | 1.727920879  | 1.708926367  | 1.162753729  |
| ENSDART00000128721 | rcvrn3            | -0.045382046 | -0.143627209 | -0.579607896 | -0.393091134 |
| ENSDART00000128722 | RGS9BP            | -0.328845343 | -0.481472863 | -0.560905879 | -0.19840165  |
| ENSDART00000128742 | CABZ01118678.1    | 0.234931395  | 0.748418816  | 0.975879993  | 0.726138214  |
| ENSDART00000128743 | tmem214           | 0.301583498  | 0.153317199  | 0.10691428   | 0.053655055  |
| ENSDART00000128760 | pacs2             | -0.00152054  | 0.063293894  | 0.531537781  | 0.626023304  |
| ENSDART00000128762 | dedd1             | -0.117364287 | -0.167908679 | -0.255046257 | -0.080222107 |
| ENSDART00000128763 | si:ch211-204c21.1 | 2.511635154  | 2.527602305  | 2.787303506  | 2.348876075  |
| ENSDART00000128784 | vmhcl             | 0.489881537  | 1.799102022  | 2.075276497  | 1.004457616  |
| ENSDART00000128786 | pyya              | 0.897714064  | 0.120108152  | -0.15783225  | -0.181132487 |
| ENSDART00000128794 | gpm6ab            | -0.753205656 | -0.206704843 | 0.388986514  | 0.547688547  |
| ENSDART00000128807 | gpr22a            | -0.50401992  | -0.32421881  | -0.337086094 | -0.059033497 |
| ENSDART00000128839 | fez1              | -0.463224643 | -0.323499809 | -0.160691051 | 0.039189596  |
| ENSDART00000128859 | prlra             | -0.153277376 | -0.232075961 | -0.477332275 | -0.11182176  |
| ENSDART00000128894 | dchs1b            | 0.298598944  | 0.508598812  | 0.623831745  | 0.178131833  |
| ENSDART00000128917 | rps4x             | 0.379768803  | 0.358465257  | 0.299276991  | 0.035010431  |
| ENSDART00000128931 | igf2bp2a          | 1.122085018  | 1.168437537  | 1.475101165  | 0.642256664  |
| ENSDART00000128959 | zgc:113223        | -1.993126278 | -0.750526857 | -1.059101824 | -0.610323514 |
| ENSDART00000128965 | bcar1             | 0.218283788  | 0.254312241  | 0.324642744  | 0.284302999  |

|                    |                    |              |              |              |              |
|--------------------|--------------------|--------------|--------------|--------------|--------------|
| ENSDART00000128969 | slit1a             | -1.459038277 | -0.917332072 | -0.293864838 | 0.107599131  |
| ENSDART00000128971 | gm2a               | 0.278528878  | 0.08350244   | -0.093671452 | -0.160146628 |
| ENSDART00000128975 | slc25a32a          | 0.048183005  | -0.130483176 | -0.493409396 | -0.216291506 |
| ENSDART00000128978 | CR391998.1         | 1.262775633  | 1.767194773  | 1.40829971   | 2.265912659  |
| ENSDART00000128981 |                    | -2.281844224 | 0.709538363  | 0.831386018  | 0.078800359  |
| ENSDART00000129032 | CR847543.1         | 0.382490935  | 0.466481864  | 0.639639363  | 0.274235342  |
| ENSDART00000129033 | si:ch211-232b12.5  | 0.004752407  | 0.255447225  | 0.704679929  | 0.201922932  |
| ENSDART00000129035 | prdx5              | -0.081081909 | -0.174815089 | -0.303582143 | -0.169217832 |
| ENSDART00000129055 | nrg2b              | -0.525587506 | -0.415280837 | -0.153878493 | 0.206094594  |
| ENSDART00000129058 | rheb               | -0.430188972 | -0.312082399 | -0.301953935 | -0.04976624  |
| ENSDART00000129062 | ikbke              | 0.350594041  | 0.34624224   | 0.094974339  | -0.516125523 |
| ENSDART00000129151 | strbp              | -0.586891224 | -0.661538944 | -0.132603114 | 0.173676112  |
| ENSDART00000129155 | vmp1               | 3.054036254  | 2.972129495  | 2.202758828  | 1.232955319  |
| ENSDART00000129156 | adcyl7             | -0.081832737 | -0.232314587 | -0.506962474 | -0.282923342 |
| ENSDART00000129167 | mapre1b            | -0.039417049 | 0.272931214  | 0.675389418  | 0.445435787  |
| ENSDART00000129189 | slc25a38b          | -0.383549453 | -0.49018808  | -0.499376221 | -0.30515595  |
| ENSDART00000129202 | DDX17              | -0.231356945 | -0.275266303 | -0.31249155  | -0.24318473  |
| ENSDART00000129210 | cry1ba             | -0.306284135 | 0.315253029  | 0.635836839  | 0.449599168  |
| ENSDART00000129214 | COX7A2 (1 of many) | -0.085157083 | -0.364093354 | -0.62455009  | -0.475756885 |
| ENSDART00000129248 | clstn1             | -0.435055335 | -0.404808779 | -0.072836605 | 0.145009995  |
| ENSDART00000129254 | zgc:173552         | 0.679613651  | 0.919867905  | 0.987455267  | 0.613846632  |
| ENSDART00000129268 | fads2              | -0.454418186 | 0.562318002  | 0.686613427  | 0.310070087  |
| ENSDART00000129273 | rps6ka1            | -0.302406528 | -0.323918919 | -0.248745254 | -0.049749754 |
| ENSDART00000129308 | ACVR1C             | -0.083617591 | -0.230914728 | -0.630759756 | -0.255735924 |
| ENSDART00000129362 | eef1a112           | 2.651521704  | 2.343527866  | 2.861864827  | 2.05813724   |
| ENSDART00000129365 | kcnb2              | -0.416222923 | -0.447467239 | -0.257551256 | -0.183749417 |
| ENSDART00000129380 | ppp5c              | 0.718884884  | 0.082309464  | 0.464958134  | 0.512508903  |
| ENSDART00000129407 | plin2              | 0.385951592  | 0.445429516  | 0.411868628  | -0.015563455 |
| ENSDART00000129423 | slc37a1            | 0.300742512  | 0.561138843  | 0.611837666  | 0.153755959  |
| ENSDART00000129427 | vkorc1             | -0.08593935  | -0.003065091 | -0.36339301  | -0.313479955 |
| ENSDART00000129458 | fasn               | -0.115300867 | 0.324414338  | 0.375920468  | 0.257409388  |
| ENSDART00000129459 | spata5l1           | 0.084981287  | 0.159429104  | 0.443203325  | 0.272680023  |
| ENSDART00000129471 | gucylb3            | -0.32002288  | -0.161099136 | -0.090567082 | 0.034491801  |
| ENSDART00000129474 | ogmb               | -0.463469684 | -0.477885606 | -0.227590281 | -0.024188229 |
| ENSDART00000129490 | gb:bc139872        | -0.183429225 | -0.314918476 | -0.330428185 | -0.307368048 |
| ENSDART00000129498 | mef2d              | -0.188451231 | -0.381445449 | -0.263610552 | -0.197973462 |
| ENSDART00000129501 | tmem235            | -0.584898252 | -0.649073781 | -0.768355336 | -0.056926947 |
| ENSDART00000129511 | robo2              | -0.431501059 | -0.512946091 | -0.075617078 | 0.250070953  |
| ENSDART00000129521 | cpsf6              | -0.125055538 | -0.280935092 | -0.125914075 | -0.005682478 |
| ENSDART00000129530 | rps27a             | 0.327713738  | 0.311901912  | 0.216145511  | -0.053626939 |
| ENSDART00000129559 | btbd3b             | -0.741839183 | -0.720572279 | -0.364214548 | 0.15940566   |
| ENSDART00000129569 | gle1               | 2.578232986  | 2.574994626  | 4.293223748  | 4.445278491  |
| ENSDART00000129593 | znf217             | 0.260126556  | 0.54491492   | 0.40143457   | 0.121556273  |
| ENSDART00000129597 | sorbs3             | 0.016863628  | 0.072993125  | -0.314882072 | -0.546339357 |
| ENSDART00000129617 | atp6ap1b           | 0.602272356  | 0.200096368  | -0.075510461 | -0.466117163 |
| ENSDART00000129643 | aplnr1b            | -0.038448881 | 0.28030901   | 0.821411842  | 0.34582741   |
| ENSDART00000129668 | fam57bb            | -0.325481107 | -0.111394328 | 0.301848072  | 0.107888881  |
| ENSDART00000129674 | slc44a2            | 0.253178883  | 0.658899779  | 0.831363022  | 0.428394942  |
| ENSDART00000129679 | abcd4              | -0.064830814 | -0.217311868 | -0.258015712 | -0.43583137  |
| ENSDART00000129704 | abhd17aa           | -0.089448965 | -0.057797962 | 0.474531723  | 0.44635249   |
| ENSDART00000129710 | crtac1a            | -0.277382094 | 0.025987329  | -0.337990061 | -0.608225673 |

|                    |                     |              |              |              |              |
|--------------------|---------------------|--------------|--------------|--------------|--------------|
| ENSDART00000129744 | grin1a              | -0.756444509 | -0.702815529 | -0.204482345 | 0.004357228  |
| ENSDART00000129749 | psmb7               | 0.370284184  | 0.518350984  | 0.484691258  | 0.174219127  |
| ENSDART00000129751 | si:ch211-105f12.2   | -0.375204291 | -0.254543259 | -0.612224773 | -0.289815804 |
| ENSDART00000129772 | gck                 | 2.162290839  | 3.39609934   | 3.505078852  | 1.699355805  |
| ENSDART00000129777 | lrp11               | -0.275801225 | -0.119366993 | -0.12158768  | 0.035259399  |
| ENSDART00000129819 | si:ch211-151p13.8   | -0.747854488 | -0.665734365 | -0.328239319 | -0.007548317 |
| ENSDART00000129834 | nat16               | -0.654571013 | -0.560511117 | -0.238004357 | -0.212203603 |
| ENSDART00000129866 | pcsk2               | -0.608807617 | -0.601188495 | -0.114458443 | 0.092104737  |
| ENSDART00000129895 | palm1b              | 0.197850318  | 0.594118975  | 0.532496272  | 0.226704229  |
| ENSDART00000129898 | ctsf                | -3.184979516 | -6.647256647 | -2.226327525 | 0.123813808  |
| ENSDART00000129903 | mfsd10              | 0.819604016  | 0.72451413   | 0.409438046  | 0.004032617  |
| ENSDART00000129910 | tmem240a            | -0.628384792 | -0.334786051 | 0.214415995  | 0.163191044  |
| ENSDART00000129916 | tmem69              | -0.236861508 | -0.141159535 | -0.401818194 | -0.186294868 |
| ENSDART00000129919 | TIFA                | 0.580552682  | 0.759337474  | 0.369383589  | -0.101109572 |
| ENSDART00000129924 | hmgb3a              | -0.441161001 | -0.289637174 | 0.049371785  | 0.069315625  |
| ENSDART00000129963 | rbp1                | 1.30707657   | 0.844804596  | -0.023243783 | -0.809227723 |
| ENSDART00000129975 | scamp4              | 0.678060482  | 0.570045099  | 0.569688168  | 0.357822663  |
| ENSDART00000130007 | GABRA2 (1 of many)  | -0.583670012 | -0.533882123 | -0.170964807 | 0.218833255  |
| ENSDART00000130093 | c10h21orf59         | -0.163395921 | -0.484168269 | -0.87971069  | -0.649928123 |
| ENSDART00000130103 | kctd16a             | -0.864638484 | -0.862435538 | 0.056246994  | 0.316558654  |
| ENSDART00000130105 | psma3               | 0.177380698  | 0.356390892  | 0.223933012  | 0.001457342  |
| ENSDART00000130125 | gnao1a              | -0.213616659 | -0.159180808 | 0.167107834  | 0.384555308  |
| ENSDART00000130131 | sult6b1             | 0.679202914  | 0.436031956  | 0.32900324   | -0.176606639 |
| ENSDART00000130142 | ube2w               | 0.018587872  | -0.041621436 | -0.37919808  | -0.07627037  |
| ENSDART00000130171 | ncl                 | -0.573496849 | -3.495808243 | 0.185293047  | 0.359494588  |
| ENSDART00000130215 | TMEM179 (1 of many) | -0.219747105 | -0.315705451 | -0.194562459 | -0.061125473 |
| ENSDART00000130264 | rpz                 | -0.422979934 | -0.28718615  | -0.432905099 | -0.242626605 |
| ENSDART00000130273 | traf3ip2b           | 0.459447337  | 1.01424616   | 0.933831804  | 0.205410709  |
| ENSDART00000130277 | rpl9                | 0.669628298  | 0.786807801  | 0.580702605  | 0.163431583  |
| ENSDART00000130297 | atg16l2             | 0.527142084  | 0.480414213  | 0.279348799  | 0.207971893  |
| ENSDART00000130310 | epb41l3a            | -0.373985055 | -0.254132145 | 0.194766582  | 0.26124696   |
| ENSDART00000130317 | arhgap20            | -0.299393415 | -0.261693015 | -0.196202201 | -0.493979065 |
| ENSDART00000130343 | parp12a             | 0.340672377  | 0.108363497  | 1.07497332   | -0.29758817  |
| ENSDART00000130353 | fdps                | 0.408185548  | 0.643895342  | 0.766681528  | 0.202680939  |
| ENSDART00000130366 | si:dkey-21c1.4      | -0.116466944 | -0.239339578 | -0.392905857 | -0.311667635 |
| ENSDART00000130375 | rap1gap             | -0.163733322 | -0.471249398 | -0.158019615 | -0.014828203 |
| ENSDART00000130388 | gfra3               | -0.144665825 | -0.360556971 | -0.224595855 | -0.144682167 |
| ENSDART00000130393 | tlr7                | -0.687566787 | -0.954352742 | -0.823581986 | -0.270839916 |
| ENSDART00000130397 | akt2                | 0.652260614  | -3.897305009 | -1.351826378 | -1.626684296 |
| ENSDART00000130413 | smc4                | 1.589552868  | 1.367681745  | 1.270952692  | 0.499256923  |
| ENSDART00000130453 | ahcyl2              | -0.228112194 | -0.250899226 | -0.220486764 | -0.265846948 |
| ENSDART00000130472 | pkhd1l1             | 0.896390148  | 0.750907757  | 1.185805195  | 0.60737198   |
| ENSDART00000130494 | moxd1               | 0.536918295  | 0.137560293  | -0.344113602 | -0.82692019  |
| ENSDART00000130537 | spag1a              | -0.063362594 | -0.300759627 | -0.420912866 | -0.152669564 |
| ENSDART00000130546 | maptb               | 0.390340472  | 1.128769701  | 1.393133544  | 1.028418073  |
| ENSDART00000130554 | isg15               | 0.469884875  | 0.09681696   | 3.101380991  | 0.025074196  |
| ENSDART00000130569 | st8sia5             | -0.025137728 | 0.545403948  | 0.761405173  | 0.616910757  |
| ENSDART00000130573 | atp6ap1a            | -0.419066331 | -0.227150493 | -0.139216735 | 0.064701891  |
| ENSDART00000130594 | afap1               | 0.283339001  | 0.479700622  | 0.53264953   | 0.107820725  |
| ENSDART00000130601 | CABZ01020840.1      | 1.211268037  | 0.754343565  | 0.351699193  | -0.297623866 |
| ENSDART00000130604 | ssuh2.4             | 0.995807077  | 0.517001744  | 0.13232339   | -0.007643053 |

|                    |                   |              |              |              |              |
|--------------------|-------------------|--------------|--------------|--------------|--------------|
| ENSDART00000130623 | dus4l             | 0.445376751  | 0.468587727  | 0.304661728  | 0.017366201  |
| ENSDART00000130626 | rars              | 0.486608727  | 0.578942242  | 0.46060205   | 0.253410521  |
| ENSDART00000130632 | hif1a2            | 0.724834586  | 1.00924352   | 1.339085575  | 0.665259415  |
| ENSDART00000130648 | scarb2c           | 0.530119641  | 0.364624401  | 0.255215167  | -0.022903408 |
| ENSDART00000130655 | csnk1a1           | -0.038868211 | -0.151998306 | -0.302247752 | -0.150662513 |
| ENSDART00000130675 | pi4k2a            | 0.32642219   | 0.46314623   | 0.446740681  | 0.229275132  |
| ENSDART00000130692 | cry1aa            | -0.303120324 | -0.112884884 | -0.294756028 | -0.171760667 |
| ENSDART00000130697 | runx1             | 0.52419199   | 0.991442797  | 1.34044624   | 0.449640925  |
| ENSDART00000130712 | pcdh2aa15         | -0.110623458 | -0.061292827 | 0.28564543   | 0.306014091  |
| ENSDART00000130722 | cacnb2b           | -0.144539412 | -0.25934202  | -0.052732887 | 0.085080318  |
| ENSDART00000130741 | fam20cb           | -0.286292768 | -0.244788679 | -0.108258226 | -0.149995213 |
| ENSDART00000130780 | clstn1            | -0.461252674 | -0.35014     | -0.010361021 | 0.286350898  |
| ENSDART00000130781 | eif4a2            | -0.090677214 | -0.087646154 | -0.280941023 | -0.172536563 |
| ENSDART00000130815 | e2f3              | 0.222958128  | 0.350714695  | 0.469146338  | 0.300980509  |
| ENSDART00000130818 | ptprz1b           | -0.275892935 | -0.352115142 | -0.541325565 | -0.202924453 |
| ENSDART00000130820 | hbegfb            | 1.26577708   | 2.42087461   | 1.934889729  | 0.952474054  |
| ENSDART00000130828 | cnrip1a           | -0.043463049 | 0.089234147  | 0.284898375  | 0.266071808  |
| ENSDART00000130880 | si:ch73-269m14.2  | -0.24405591  | -0.090252599 | -0.043271301 | -0.190219309 |
| ENSDART00000130881 | gabrr2a           | -0.366410023 | -0.492281459 | -0.409834    | -0.272101123 |
| ENSDART00000130891 | camk4             | -0.554565795 | -0.502410128 | -0.607057653 | -0.157488548 |
| ENSDART00000130911 | cmklr1            | 1.293061027  | 1.016453103  | 0.21085461   | 0.074156746  |
| ENSDART00000130977 | mtcl1             | -0.152016911 | -0.472594538 | -0.24239267  | -0.004366794 |
| ENSDART00000131010 | zgc:114175        | -0.532140281 | -0.400405891 | 0.129904669  | 0.109706695  |
| ENSDART00000131014 | sept7a            | 0.353546424  | 0.539836173  | 0.262138094  | 0.154511745  |
| ENSDART00000131019 | acadvl            | 0.465985818  | 0.491501242  | 0.281421395  | 0.167335906  |
| ENSDART00000131027 | TMEM216           | -0.171407049 | -0.12306379  | -0.494331831 | -0.331123076 |
| ENSDART00000131030 | gorasp1a          | -0.03820825  | -0.156177406 | -0.398312611 | -0.044697109 |
| ENSDART00000131041 | doc2b             | -0.197976996 | -0.14606408  | -0.273923734 | -0.068935148 |
| ENSDART00000131072 | rpz2              | 0.192971155  | 0.376625546  | 0.204804322  | 0.050600303  |
| ENSDART00000131075 | dusp23b           | -0.349967426 | -0.590231643 | 0.026826234  | -0.132825162 |
| ENSDART00000131101 | alpl              | -0.065559311 | -0.084665618 | -0.114820296 | -0.355758107 |
| ENSDART00000131110 | pigx              | -0.041181166 | -0.247067458 | -0.407100449 | -0.233879595 |
| ENSDART00000131126 | bcl6a             | -0.096649799 | -0.044696983 | 0.295011601  | 0.436349263  |
| ENSDART00000131134 | si:ch211-206a7.2  | -0.226522125 | -0.472315068 | -0.371394997 | -0.101330709 |
| ENSDART00000131137 | arhgef16          | 0.581874028  | 0.364359378  | 0.072001305  | -0.274180473 |
| ENSDART00000131143 | sept5b            | -0.480326507 | -0.332562488 | 0.283118689  | 0.526750102  |
| ENSDART00000131161 | sema3c            | -0.186853445 | 0.134603767  | 0.50487559   | 0.558561927  |
| ENSDART00000131177 | adcy1b            | -0.090441849 | -0.360182616 | -0.355106619 | 0.00963355   |
| ENSDART00000131204 | asap1b            | -0.546891821 | -0.455253903 | -0.26913051  | -0.092257648 |
| ENSDART00000131206 | march1            | -0.087431315 | -0.336892252 | -0.48450384  | -0.18585378  |
| ENSDART00000131217 | ippk              | 0.31853123   | 0.426685761  | 0.198265799  | 0.012388457  |
| ENSDART00000131241 | CD53              | 1.613639378  | 1.480348694  | 1.150180939  | 0.900907437  |
| ENSDART00000131286 | erlin2            | -0.000462383 | -0.183644452 | -0.434826094 | -0.105981059 |
| ENSDART00000131288 | adap2             | 0.075508361  | 0.577403234  | 0.52972951   | 0.102379235  |
| ENSDART00000131319 | ctps1a            | 0.387589066  | 0.225454863  | 0.161786406  | -0.016402726 |
| ENSDART00000131323 | si:dkey-193c22.1  | -0.375872197 | -0.187390024 | -0.399004983 | -0.194977152 |
| ENSDART00000131339 | capns1a           | 0.087047749  | 0.358949459  | 0.212677567  | 0.044194443  |
| ENSDART00000131349 | mob2b             | 0.337219743  | -0.092777728 | -0.774689204 | -0.397735432 |
| ENSDART00000131354 | si:ch211-235f12.2 | -0.417898946 | 0.007918255  | -0.299865948 | -0.220993476 |
| ENSDART00000131355 | cntn3a.1          | -0.54935923  | -0.424970108 | -0.640814852 | -0.044155876 |
| ENSDART00000131361 | kcnip3b           | -0.353450144 | -1.035812483 | -0.692091767 | -0.071599751 |

|                    |                    |              |              |              |              |
|--------------------|--------------------|--------------|--------------|--------------|--------------|
| ENSDART00000131400 | CR792453.3         | 2.47650448   | 0.829837833  | -0.069994818 | -0.405416724 |
| ENSDART00000131431 | sulf2a             | 0.379800676  | 0.895838573  | 1.99747824   | 2.182238849  |
| ENSDART00000131443 | dpm2               | -0.116130222 | -0.034113196 | -0.2501536   | -0.189683686 |
| ENSDART00000131477 | si:dkeyp-72g9.4    | -1.377600786 | -1.267958825 | -0.607564413 | -0.337098864 |
| ENSDART00000131478 | kcnab1a            | -0.495628945 | -0.276495434 | -0.300290472 | -0.132892856 |
| ENSDART00000131506 | cdh6               | -0.336043184 | -0.313603925 | -0.315311457 | -0.136816058 |
| ENSDART00000131508 | col9a1b            | -0.262030114 | 0.179891299  | -0.305486246 | -1.812812408 |
| ENSDART00000131517 | si:ch211-232m10.6  | -0.306074293 | -0.295884968 | -0.441790198 | -0.281067097 |
| ENSDART00000131557 | mvdb               | 0.053284375  | 1.694163577  | 1.512604373  | 0.78016058   |
| ENSDART00000131558 | zgc:103438         | 0.587891191  | 0.925990315  | 0.240143957  | -0.080675365 |
| ENSDART00000131579 | ptprdb             | -0.516674931 | -0.642051878 | 0.273217974  | 0.528486925  |
| ENSDART00000131582 | cbx3b              | -0.219219    | -0.174464705 | -0.354832647 | -0.341719477 |
| ENSDART00000131610 | serbp1a            | 0.184686975  | 0.28885198   | 0.237091318  | 0.011396501  |
| ENSDART00000131616 | atp5f1             | -0.440716151 | -0.423675229 | -0.427802237 | -0.218465008 |
| ENSDART00000131627 | kcnn3              | -0.085165392 | -0.23467025  | -0.387311243 | -0.108636046 |
| ENSDART00000131632 | ptk6a              | -0.239390363 | 0.61942439   | 1.358814463  | 0.292212059  |
| ENSDART00000131649 | sulf2b             | -0.232056185 | -0.450328943 | -0.252313155 | 0.036414893  |
| ENSDART00000131661 | rps9               | 0.491211514  | 0.443239408  | 0.342502062  | -0.078353052 |
| ENSDART00000131694 | selenbp1           | 0.440307718  | 0.23934875   | 0.219921774  | -0.162883702 |
| ENSDART00000131714 | mbnl2              | -0.406601788 | -0.032543807 | -0.091713267 | 0.092369986  |
| ENSDART00000131721 | fam65b             | -0.06007994  | 0.061772028  | 0.37892142   | 0.335909594  |
| ENSDART00000131724 | pld3               | 0.801498613  | 0.654598157  | 0.377873753  | 0.229417497  |
| ENSDART00000131731 | mef2ca             | 0.234535922  | -0.250149626 | -0.381098175 | -0.047609857 |
| ENSDART00000131736 | kcnq2a             | -0.749729315 | -0.34933354  | 0.575885203  | 0.723193716  |
| ENSDART00000131768 | abi1a              | 0.352423076  | 0.342648792  | 0.429769283  | 0.194498692  |
| ENSDART00000131802 | si:dkey-204f11.64  | 0.501807484  | 0.364460777  | 0.066146426  | -0.103454568 |
| ENSDART00000131846 | osbp11             | 0.131220058  | 0.159712436  | 0.340514183  | 0.184103052  |
| ENSDART00000131848 | BX004774.2         | 0.065629354  | -0.435237015 | -1.040450944 | -0.818745042 |
| ENSDART00000131860 | rpl10              | 0.591996417  | 0.137912232  | 0.041524333  | -0.247459563 |
| ENSDART00000131861 | tmsb2              | 0.228394728  | 0.766531981  | 0.776266217  | 0.553413207  |
| ENSDART00000131866 | trhra              | -0.77311942  | -0.482590954 | -0.518111078 | -0.348001173 |
| ENSDART00000131880 | ftr34              | 0.638978186  | 0.318226461  | 1.201576119  | 0.041863892  |
| ENSDART00000131922 | ucp3               | 0.966573752  | 1.664449524  | 1.416927563  | 1.012896527  |
| ENSDART00000131940 | si:dkey-30c15.10   | 1.656397572  | 1.745533662  | 1.503033451  | 0.676482739  |
| ENSDART00000131944 | tagln3b            | 0.184610888  | 0.818287372  | 1.023242059  | 0.555937355  |
| ENSDART00000131954 | irf2a              | -0.009751778 | -0.124292592 | -0.35526394  | -0.165453436 |
| ENSDART00000131956 | si:dkey-33c12.14   | 2.548697019  | 3.072973071  | 2.718694487  | 2.992696235  |
| ENSDART00000131966 | AL929520.1         | 1.864305398  | 1.102319083  | 0.530092783  | 0.456970098  |
| ENSDART00000131973 | lrmp               | -0.070199137 | -0.469517154 | -1.098854311 | -0.136597848 |
| ENSDART00000131976 | adipor1a           | -0.018834429 | -0.17416639  | -0.271837866 | -0.17995065  |
| ENSDART00000131983 | myhz1.2            | -0.851007348 | 2.593036141  | 3.254881434  | 2.63776379   |
| ENSDART00000131994 | mthfd1l            | 2.796349329  | 3.017388421  | 3.058988321  | 0.924891143  |
| ENSDART00000132027 | spock2             | -0.61060119  | -0.435727551 | -0.163124474 | 0.204372495  |
| ENSDART00000132119 | max                | 0.339991432  | 0.197083488  | 0.14057043   | 0.318686745  |
| ENSDART00000132123 | thsd7ba            | -0.490674171 | -0.551076996 | -0.028899921 | -0.007032812 |
| ENSDART00000132146 | hsd17b7            | 2.880332402  | 3.535090877  | 2.510243514  | 2.078786507  |
| ENSDART00000132156 | cirbpb             | 0.302166347  | 0.411233461  | 0.214244406  | 0.367929369  |
| ENSDART00000132158 | ptpn18             | 0.848975716  | 0.700592324  | 0.349323957  | -0.024370763 |
| ENSDART00000132170 | dlg1               | -0.324614076 | 0.23335851   | 0.829812481  | 1.031575976  |
| ENSDART00000132171 | CALHM1 (1 of many) | -0.125733999 | -0.221900772 | -0.83821175  | -0.699866376 |
| ENSDART00000132175 | nadl1.1            | 0.709405923  | 0.881560036  | 1.238414697  | 1.046443747  |

|                    |                    |              |              |              |              |
|--------------------|--------------------|--------------|--------------|--------------|--------------|
| ENSDART00000132189 | mogs               | 0.278316469  | 0.095835936  | 0.119934101  | 0.001358604  |
| ENSDART00000132206 | si:dkey-242g16.2   | 0.572333551  | 0.964289734  | 1.608250495  | 0.992663233  |
| ENSDART00000132216 | paox1              | 0.706860126  | 0.311306251  | -0.007602467 | -0.279227462 |
| ENSDART00000132235 | klhl24b            | 0.278493921  | 0.515923362  | 0.500638596  | 0.185998384  |
| ENSDART00000132278 | rnf144ab           | -0.480742338 | -0.392838261 | -0.157627213 | -0.112649454 |
| ENSDART00000132294 | fut8a              | -0.131220853 | -0.116575506 | 0.125377151  | 0.342318079  |
| ENSDART00000132296 | klhl17             | -0.721040801 | -0.498955013 | 0.192513289  | 0.489858233  |
| ENSDART00000132297 | adam9              | 0.312303854  | 0.492550355  | 0.565368245  | 0.224580764  |
| ENSDART00000132342 | kiaa1549lb         | -0.130776123 | -0.485143208 | -0.118054479 | 0.086040071  |
| ENSDART00000132365 | b3gnt5a            | 0.764122726  | 0.855145882  | 0.650888001  | 0.125992099  |
| ENSDART00000132366 | emp1               | -1.811345528 | -0.544421651 | -0.327114312 | 0.270404939  |
| ENSDART00000132367 | si:ch211-235f12.2  | 0.051407266  | -0.037706651 | -0.368292836 | -0.27129379  |
| ENSDART00000132384 | si:dkey-222b8.4    | -0.294618002 | -0.481620656 | -0.505454645 | -0.268964873 |
| ENSDART00000132386 | si:dkey-21e2.15    | 2.037905679  | 4.749110822  | 3.364621679  | 1.867440085  |
| ENSDART00000132387 | pvalb6             | -0.612280143 | -0.883743713 | -0.424014361 | -0.028285642 |
| ENSDART00000132390 | ankrd33ba          | -0.590428215 | -0.156095959 | 0.097976154  | 0.018978411  |
| ENSDART00000132411 | si:ch1073-184j22.2 | -0.765110378 | -1.0433591   | -0.590491476 | -0.153408732 |
| ENSDART00000132426 | stmn4              | 0.67103814   | 1.650930846  | 1.637640616  | 1.211182541  |
| ENSDART00000132437 | mknk2a             | 1.021696261  | 1.216138852  | 0.746540318  | 1.080690265  |
| ENSDART00000132471 | csmd2              | -0.459001483 | -0.911607393 | -0.371722747 | 0.062349627  |
| ENSDART00000132491 | wdr83os            | -0.018771998 | -0.11821754  | -0.249438444 | -0.184919889 |
| ENSDART00000132522 | syt13              | -0.475976654 | -0.458152818 | -0.514134367 | -0.475986362 |
| ENSDART00000132542 | bdh2               | 0.716106023  | 0.289356437  | -0.133918448 | -0.268013639 |
| ENSDART00000132543 | klhdc8b            | -0.423366405 | -0.574887213 | -0.139148992 | -0.034877401 |
| ENSDART00000132545 | slc25a24           | -0.397809038 | -0.303980258 | -0.481236788 | -0.168683615 |
| ENSDART00000132582 | map4l              | -0.700979622 | -0.493129551 | -0.385069171 | -0.268022699 |
| ENSDART00000132583 | nrxn2a             | -0.296541609 | -0.578930697 | -0.085512446 | 0.138469202  |
| ENSDART00000132591 | si:ch211-191i18.4  | 0.099974449  | -0.068457558 | -0.479286849 | -0.192940747 |
| ENSDART00000132605 | shc2               | 0.131499648  | 0.254257685  | 0.501707163  | 0.375914832  |
| ENSDART00000132637 | rab34a             | 0.251888735  | 0.316357959  | 0.030371007  | -1.217256649 |
| ENSDART00000132658 | si:ch211-194p6.12  | 0.494361641  | 0.293067303  | 0.277540839  | 0.243465173  |
| ENSDART00000132659 | INAVA (1 of many)  | -0.598820951 | -0.566244118 | -0.753512572 | -0.519207877 |
| ENSDART00000132660 | polr3gla           | 0.823813849  | 0.325249077  | 0.007723106  | -0.29164484  |
| ENSDART00000132663 | si:ch211-163b2.4   | 0.347936584  | 0.995221531  | 0.769857122  | 0.372703166  |
| ENSDART00000132664 | hmbsa              | 1.719683433  | 3.421951592  | 1.469413717  | 1.652766494  |
| ENSDART00000132667 | si:ch211-213a13.2  | 1.006426879  | 1.056394216  | 0.902670878  | 0.63305431   |
| ENSDART00000132685 | kcnn1b             | -1.625205585 | -1.495755896 | -0.13719571  | 0.28532188   |
| ENSDART00000132691 | adgrb3             | -0.413275118 | -0.450913383 | -0.19602447  | 0.067293319  |
| ENSDART00000132696 | nckap1             | 0.516973126  | 0.759090684  | 0.845846182  | 0.627500278  |
| ENSDART00000132710 | pimr127            | -0.279310009 | -0.946546987 | -0.201892971 | -0.041573331 |
| ENSDART00000132732 | tmem86b            | 0.107129941  | 0.17748496   | 0.221749507  | 0.409811812  |
| ENSDART00000132740 | ppp3cca            | -0.073909682 | -0.313026697 | -0.310470542 | -0.074974696 |
| ENSDART00000132742 | apoc1              | 0.900470905  | 0.457797087  | -0.066389631 | 0.150028097  |
| ENSDART00000132744 | ppcdc              | 0.019198695  | -0.177358944 | -0.471740583 | -0.31681582  |
| ENSDART00000132761 | arhgdig            | -3.192123378 | 0.713824666  | 1.228568907  | 0.922752193  |
| ENSDART00000132767 | pxdc1a             | -0.518773739 | -0.198850875 | -0.436310873 | -0.094674576 |
| ENSDART00000132781 | si:dkey-78l4.1     | 3.429067431  | 4.682405989  | 3.946041907  | 2.798505508  |
| ENSDART00000132788 | uap1               | 1.271261725  | 1.549537095  | 1.061485612  | 0.525207108  |
| ENSDART00000132827 | slc29a4            | -0.39428721  | -0.406514798 | -0.162001645 | -0.399843403 |
| ENSDART00000132829 | inadl              | -0.343759067 | -0.387749769 | -0.321781319 | -0.246918999 |
| ENSDART00000132830 | stoml3b            | 2.594772138  | 1.896323147  | 1.645470476  | 1.013599137  |



|                    |                    |              |              |              |              |
|--------------------|--------------------|--------------|--------------|--------------|--------------|
| ENSDART00000132838 | ank1a              | -1.15020902  | -1.58246422  | -0.789622662 | -0.12782961  |
| ENSDART00000132884 | cxxc5a             | -0.136575965 | 0.119118699  | 0.415415664  | 0.166435977  |
| ENSDART00000132911 | vwc2l              | -0.573360674 | -0.839884971 | -0.564408735 | 0.020047377  |
| ENSDART00000132915 | serpine3           | -0.093377161 | -0.220423221 | -0.800809367 | -1.077921671 |
| ENSDART00000132930 | pcbp3              | -0.89548835  | -0.955377646 | -0.326630607 | 0.075971616  |
| ENSDART00000132941 | si:ch1073-287p18.1 | -0.223138733 | -0.188273    | -0.453602691 | -0.273864822 |
| ENSDART00000132953 | gsto2              | 2.493368999  | 2.571702083  | 1.494039414  | 1.444027796  |
| ENSDART00000132981 | si:dkey-126g1.9    | 0.817837135  | 2.40599851   | 2.663801596  | 3.155063025  |
| ENSDART00000132982 | leng9              | 3.031473639  | 2.780356944  | 2.241298703  | 1.634482288  |
| ENSDART00000132995 | ak3                | 0.087221034  | 0.050666468  | -0.189471235 | -0.418943401 |
| ENSDART00000133028 | mus81              | -0.28108498  | -0.562830421 | -0.307741383 | -0.072240912 |
| ENSDART00000133030 | psmd1              | 3.699340083  | 3.88833786   | 2.358920441  | 3.148062929  |
| ENSDART00000133035 | syt5a              | -0.188232763 | -0.271065673 | -0.434073976 | -0.186984299 |
| ENSDART00000133036 | elavl3             | 0.009017018  | 0.132987196  | 0.394658714  | 0.30975228   |
| ENSDART00000133039 | tac3a              | -0.2410584   | -0.489343566 | -0.63037654  | -0.413025711 |
| ENSDART00000133042 | lrriq1             | 1.127502736  | 0.596946573  | 0.146972775  | 0.204949423  |
| ENSDART00000133059 | cited4a            | -0.002602779 | 0.055649701  | -0.293136781 | -0.030683128 |
| ENSDART00000133079 | c3a.5              | 1.938352782  | 2.924341422  | 2.291243352  | 0.500346416  |
| ENSDART00000133092 | st6galnac5a        | -0.798487612 | -0.408716424 | -0.156113795 | 0.220161008  |
| ENSDART00000133099 | zgc:123105         | -0.457591599 | -0.29947281  | -0.397070368 | -0.177964487 |
| ENSDART00000133109 | rps28              | 0.456862734  | 0.459372965  | 0.307002895  | 0.056264372  |
| ENSDART00000133114 | bend5              | -0.067900889 | -0.281239203 | 0.001023992  | -0.054776456 |
| ENSDART00000133121 | bub1               | 1.470451257  | 1.232808742  | 1.262010591  | 0.843166609  |
| ENSDART00000133131 | uba1               | 0.147030579  | 0.239356262  | 0.529136799  | 0.293288779  |
| ENSDART00000133134 | efemp2b            | -0.009444426 | 0.019713651  | -0.293460329 | -0.603842237 |
| ENSDART00000133143 | gpd1b              | -0.326643231 | -0.124586783 | -0.280591098 | -0.372586222 |
| ENSDART00000133167 | si:dkey-98f17.5    | 0.605842267  | 0.54718235   | 0.319480313  | 0.041690788  |
| ENSDART00000133172 | palm1a             | -0.485644015 | -0.226508351 | 0.746051517  | 0.735100737  |
| ENSDART00000133176 | si:dkey-171o17.8   | -0.335115287 | -0.40576097  | -0.392381982 | -0.176105305 |
| ENSDART00000133183 | parp8              | 0.666223987  | 0.351288157  | 0.707539986  | 0.438871753  |
| ENSDART00000133186 | ntng1a             | -0.121155505 | -0.544453536 | -0.029519061 | 0.307964269  |
| ENSDART00000133194 | tbc1d1             | 2.782559818  | 3.186152585  | 2.750502559  | 1.318506947  |
| ENSDART00000133220 | CR788254.2         | -0.013907422 | -0.231082485 | -0.739605077 | -0.487191429 |
| ENSDART00000133223 | COQ10A             | -0.381890626 | -0.12435669  | 0.152677483  | 0.108453147  |
| ENSDART00000133242 | syne2b             | 0.14436825   | -0.456480635 | -0.844135801 | -0.206154738 |
| ENSDART00000133267 | grip2b             | -0.249633664 | -0.394997267 | -0.432273427 | -0.409837225 |
| ENSDART00000133302 | pkfb4a             | 0.027105161  | -0.087436901 | -0.335656317 | -0.089798414 |
| ENSDART00000133304 | npm1a              | 1.159038348  | 0.761096985  | 0.663684243  | 0.261874194  |
| ENSDART00000133325 | nell2b             | -0.450880659 | -0.507896343 | -0.516937003 | -0.181021434 |
| ENSDART00000133330 | fam214b            | -0.307417712 | -0.32820559  | -0.047756819 | 0.003374146  |
| ENSDART00000133348 | si:ch211-240g9.1   | -0.327991939 | -0.379613386 | -0.287166398 | -0.033274341 |
| ENSDART00000133354 | irx4b              | -1.675681332 | -1.90655223  | 0.291488221  | 1.156903659  |
| ENSDART00000133375 | si:dkey-30c15.17   | 0.981163755  | 0.773615181  | 0.451221931  | -0.42308326  |
| ENSDART00000133384 | nr2f1a             | -0.318698493 | -0.194424161 | -0.079355488 | -0.084390635 |
| ENSDART00000133385 | lrp1ba             | -0.614935587 | -0.929322267 | -0.360685611 | 0.193952764  |
| ENSDART00000133404 | rps24              | 0.584478639  | 0.636503255  | 0.16891132   | -0.309462265 |
| ENSDART00000133419 | CR847953.1         | 0.226198142  | -0.018883626 | 0.274295718  | 0.480234099  |
| ENSDART00000133440 | prdm2a             | -0.400160361 | -0.315344703 | -0.135326537 | 0.100769097  |
| ENSDART00000133449 | FO818659.1         | -0.258028224 | -0.214758594 | -0.076374423 | 0.03227851   |
| ENSDART00000133466 | CR847503.1         | -0.023677254 | 0.459363169  | 0.719903439  | 0.430626169  |
| ENSDART00000133473 | CU207343.1         | 0.284146912  | 1.104685019  | 1.557001573  | 0.994606199  |

|                    |                   |              |              |              |              |
|--------------------|-------------------|--------------|--------------|--------------|--------------|
| ENSDART00000133485 | BX004774.1        | 0.155994197  | -0.204649087 | -0.333501142 | -0.428721476 |
| ENSDART00000133487 | fosb              | -0.882572207 | -1.273781011 | -0.772506712 | -0.914864674 |
| ENSDART00000133496 | CU467110.1        | -0.265746647 | -0.189978673 | -0.362219245 | -0.151144337 |
| ENSDART00000133497 | si:dkey-250k15.4  | 0.495799772  | 1.080770342  | 1.149092422  | 0.612727116  |
| ENSDART00000133504 | dab2ipb           | -0.309610082 | -0.535236809 | -0.062134515 | 0.075905091  |
| ENSDART00000133512 | fosl1b            | 2.958627889  | 2.652355797  | 1.322528527  | 0.313643003  |
| ENSDART00000133517 | si:dkey-228b2.5   | 0.6930874    | 0.410660128  | 0.386710557  | 0.222079502  |
| ENSDART00000133550 | fkbp1             | 0.247078783  | 0.644847847  | 0.380481334  | 0.08075265   |
| ENSDART00000133583 | si:ch211-117m20.4 | -0.073043862 | -0.13648785  | -0.437013406 | -0.146443055 |
| ENSDART00000133587 | wsb2              | -0.218297067 | -0.234838526 | -0.321740633 | -0.105339309 |
| ENSDART00000133613 | AL954694.1        | -0.189304139 | -0.336191594 | -0.52116431  | -0.341767633 |
| ENSDART00000133628 | ankib1a           | 0.478883806  | 0.425404685  | 0.598914996  | 0.306729273  |
| ENSDART00000133644 | magi2a            | -0.426844627 | -0.586214992 | -0.344780913 | 0.065236587  |
| ENSDART00000133659 | ncapg             | 0.759144886  | 0.927669912  | 0.449671959  | 0.278225274  |
| ENSDART00000133661 | tasp1             | -0.129454637 | -0.177592146 | -0.299309238 | -0.129141605 |
| ENSDART00000133699 | drd4b             | -0.558425031 | 0.210961997  | -0.355610364 | -0.126077055 |
| ENSDART00000133701 | slc6a1a           | -0.417718543 | -0.444992936 | -0.335539494 | -0.221449117 |
| ENSDART00000133707 | st3gal3a          | -0.191118701 | -0.289597986 | -0.435587316 | -0.218434667 |
| ENSDART00000133708 | arhgef4           | 0.196005293  | 0.61534617   | 0.621912538  | 0.36146972   |
| ENSDART00000133718 | ddx5              | 0.680973492  | 0.739800314  | 0.555100275  | 0.545762532  |
| ENSDART00000133721 | si:ch211-156j22.4 | 0.531762631  | 0.492062657  | 0.618453608  | 0.322450987  |
| ENSDART00000133735 | cacng7b           | -0.52911361  | -0.351880161 | -0.311790544 | -0.261905914 |
| ENSDART00000133743 | camkk1a           | -0.520213698 | -0.784879077 | -0.322164805 | -0.513359014 |
| ENSDART00000133775 | pdlim3b           | 2.202802348  | 2.787120555  | 2.295385553  | 1.784176005  |
| ENSDART00000133786 | si:ch211-196l7.4  | -0.265117484 | -0.278594168 | -0.287454952 | -0.249634822 |
| ENSDART00000133802 | inpp5jb           | -0.26851081  | -0.522364408 | -0.244805361 | -0.012462884 |
| ENSDART00000133823 | arvcfb            | 0.059276527  | -0.645309269 | -0.357027269 | -0.368113028 |
| ENSDART00000133851 | nyap2b            | -0.344969094 | 0.36816036   | 0.857787268  | 0.825724613  |
| ENSDART00000133867 | arfip2a           | -0.237325336 | -0.320204428 | -0.424850477 | -0.153128941 |
| ENSDART00000133869 | kcnk1a            | -0.389144165 | -0.38978007  | -0.667699511 | -0.286776021 |
| ENSDART00000133891 | FP015789.1        | -0.349747936 | -0.468679484 | -0.676764109 | -0.710268862 |
| ENSDART00000133902 | clstn1            | -0.274744137 | -0.313184588 | -0.391319406 | -0.194558837 |
| ENSDART00000133917 | lrrtm1            | -0.267345102 | -0.23914052  | -0.165843211 | -0.135383045 |
| ENSDART00000133922 | atp2b3a           | -0.330787062 | -0.407621044 | -0.300317219 | -0.080866095 |
| ENSDART00000133934 | rps9              | 0.75844303   | 0.709617891  | 0.420926612  | 0.393006212  |
| ENSDART00000133946 | si:dkey-147f3.8   | 1.477973714  | 1.681506394  | 1.170700784  | -0.068341199 |
| ENSDART00000133954 | mhc1uka           | 4.819339023  | 5.453978456  | 5.536236268  | 3.849327613  |
| ENSDART00000133956 | phactr3a          | -0.466148377 | -0.040906797 | 0.400008422  | 0.572153181  |
| ENSDART00000133968 | camkmt            | 0.353110068  | 0.455754701  | 0.544139309  | 0.380701512  |
| ENSDART00000133981 | bco2a             | -0.093189558 | -0.108753759 | -0.2707511   | -0.08847471  |
| ENSDART00000133985 | kcnd1             | -1.187342293 | -1.392518344 | -0.747443213 | -0.002522665 |
| ENSDART00000134035 | cntnap5b          | -1.01200416  | -1.154440105 | -0.403471674 | 0.139198923  |
| ENSDART00000134044 | vdac3             | -0.155270833 | 0.146773494  | 0.378912201  | 0.402649801  |
| ENSDART00000134047 | cyp2p10           | -0.641341489 | -0.436063229 | -0.777629241 | -0.630838584 |
| ENSDART00000134052 | si:dkey-17e16.8   | 0.112444287  | 0.152961651  | 0.336755528  | 0.189687147  |
| ENSDART00000134053 | usp2a             | -0.375529791 | -0.273036858 | -0.320691469 | -0.159380591 |
| ENSDART00000134054 | si:dkey-13i19.8   | 0.097967988  | -0.010643615 | -0.259041425 | -0.27695026  |
| ENSDART00000134064 | mxd1              | -0.125104323 | -0.265030232 | -0.047451672 | 0.092856449  |
| ENSDART00000134083 | arhgap21b         | -0.613534268 | -0.758748481 | -1.557344733 | -0.550383994 |
| ENSDART00000134087 | col14a1a          | -0.156423731 | -0.247987955 | -0.214368462 | -0.368307818 |
| ENSDART00000134094 | zgc:162193        | 0.951212203  | 1.108680472  | 1.240038838  | 0.640044887  |

|                    |                   |              |              |              |              |
|--------------------|-------------------|--------------|--------------|--------------|--------------|
| ENSDART00000134128 | imp1a             | -0.245363296 | -0.207318324 | -0.487433197 | -0.127440305 |
| ENSDART00000134146 | mtss1             | 0.331132861  | 0.244842152  | 0.229292017  | -0.102446838 |
| ENSDART00000134186 | cplx4b            | -0.392479495 | -0.543085477 | -0.51593407  | -0.267696813 |
| ENSDART00000134189 | npm1a             | 1.523433306  | 1.012610127  | 1.305980875  | 0.439289484  |
| ENSDART00000134190 | sort1b            | -0.233086943 | -0.116629656 | -0.586941063 | -0.191255985 |
| ENSDART00000134202 | ccka              | -0.373763887 | -0.443030746 | -0.635815918 | -0.444990754 |
| ENSDART00000134206 | hspsb8            | 0.868767381  | 0.59923642   | 0.380053431  | 0.101288698  |
| ENSDART00000134241 | olm1a             | -1.215716601 | -1.195013518 | 0.048027409  | 0.32030838   |
| ENSDART00000134242 | zfand5a           | 0.011715993  | -0.114565058 | -0.599260538 | -0.310476512 |
| ENSDART00000134257 | znf1027           | 2.316081338  | 1.234819597  | 2.431130405  | 1.907826667  |
| ENSDART00000134261 | dnm1b             | -0.433650537 | -0.451510325 | 0.138870574  | 0.465815695  |
| ENSDART00000134269 | fkbp1aa           | 0.162085973  | 0.545601006  | 0.44355879   | 0.374542557  |
| ENSDART00000134307 | dclk1a            | -1.448196855 | -0.41548572  | -0.010990365 | -0.586401585 |
| ENSDART00000134393 | arhgef9a          | -0.866173468 | -1.122671917 | -0.27973916  | -0.154746662 |
| ENSDART00000134399 | slkb              | -0.338857379 | -0.632619838 | -0.770465733 | -0.089077643 |
| ENSDART00000134404 | si:ch211-158d24.4 | 0.479480538  | 0.856462378  | 0.502566478  | -0.11398241  |
| ENSDART00000134431 | pcbp3             | -0.497499314 | -0.525712825 | -0.323624866 | -0.140513929 |
| ENSDART00000134455 | zgc:100906        | -0.319125396 | 0.101796228  | 0.299790493  | 0.225508495  |
| ENSDART00000134470 | fhdc1             | 0.136576688  | 0.100413162  | -0.280286506 | -0.662790087 |
| ENSDART00000134472 | taok3b            | -0.264981976 | -0.491201835 | -0.021652579 | 0.079259902  |
| ENSDART00000134475 | gdap1             | -0.459369959 | -0.408869462 | -0.283212336 | -0.008346648 |
| ENSDART00000134489 | htr2cl1           | -0.503209957 | -0.409297224 | -0.43743207  | -0.200430987 |
| ENSDART00000134506 | si:dkey-196j8.2   | -0.894031142 | -1.351407426 | -0.577940716 | -0.262796642 |
| ENSDART00000134514 | smarca4a          | 0.020398578  | 0.110031025  | 0.339984244  | 0.255390677  |
| ENSDART00000134518 | cpa6              | -0.382405278 | -0.418058887 | -0.443147645 | -0.210306107 |
| ENSDART00000134542 | csde1             | 0.186004618  | 0.310572638  | 0.257821474  | 0.010065768  |
| ENSDART00000134560 | slc45a1           | -0.495253985 | -0.301829281 | 0.42188175   | 0.485995526  |
| ENSDART00000134564 | srsf5b            | -0.27445076  | -0.31745813  | -0.113899297 | -0.080138136 |
| ENSDART00000134571 | rpl13a            | 0.370507733  | 0.272503899  | 0.102928018  | -0.095604932 |
| ENSDART00000134602 | gria2b            | -0.15956996  | -0.75241939  | -0.264702392 | 0.253919663  |
| ENSDART00000134608 | phyhplb           | -0.442372787 | -0.312061243 | -0.158725579 | -0.176785812 |
| ENSDART00000134635 | si:dkey-9i23.15   | 0.362598675  | 0.484654675  | 0.418405681  | -0.053498182 |
| ENSDART00000134649 | CNGA1 (1 of many) | -0.31835112  | -0.262022337 | -0.573519962 | -0.315754252 |
| ENSDART00000134658 | slc44a1a          | 0.707497042  | 0.591443803  | 0.629657706  | 0.651062281  |
| ENSDART00000134661 | gstcd             | -0.989748846 | -0.61234101  | -0.452964111 | -0.446444607 |
| ENSDART00000134697 | pik3ip1           | -0.252912627 | -0.195771257 | -0.573002676 | -0.212029641 |
| ENSDART00000134715 | elmod1            | -1.115600356 | -1.115324879 | -0.105456948 | 0.485174818  |
| ENSDART00000134717 | tspan18a          | 0.042661269  | 0.285439514  | 0.614193732  | 0.731823089  |
| ENSDART00000134722 | bcl2l13           | -0.594192147 | -0.544774096 | -0.184876076 | -0.124896832 |
| ENSDART00000134727 | TNNC2 (1 of many) | -0.059692967 | 2.582271594  | 3.518368083  | 2.376076569  |
| ENSDART00000134729 | BX936308.1        | -0.246065702 | 0.716060471  | 1.529870623  | 1.562652796  |
| ENSDART00000134763 | zgc:112056        | 0.091717396  | -0.08997535  | -0.362094913 | -0.168303392 |
| ENSDART00000134773 | zfand5a           | -0.170709233 | -0.221425066 | -0.980962271 | -0.517481995 |
| ENSDART00000134787 | elavl4            | 1.446773831  | 1.526430349  | 1.657041106  | 1.070021064  |
| ENSDART00000134801 | ccdc92            | 0.127931369  | 0.677319918  | 0.797788944  | 0.697201329  |
| ENSDART00000134813 | rx1               | -1.006947632 | -0.71282108  | -0.035273805 | -0.106549447 |
| ENSDART00000134816 | slc2a3a           | -0.406786727 | -0.444029943 | -0.052958142 | 0.129218418  |
| ENSDART00000134819 | slc5a6a           | 0.44313334   | -0.037657655 | -0.159985236 | -0.577627715 |
| ENSDART00000134832 | rbpms2b           | -1.576691045 | -2.099790887 | -0.701820765 | 0.187979586  |
| ENSDART00000134843 | sst6              | 1.638903894  | 2.735989277  | 2.458183626  | 2.301951228  |
| ENSDART00000134855 | efr3bb            | -0.263384976 | -0.381748192 | -0.1453091   | 0.002074194  |

|                    |                    |              |              |              |              |
|--------------------|--------------------|--------------|--------------|--------------|--------------|
| ENSDART00000134864 | gigyf1b            | -0.032906085 | -0.141419247 | -0.36943011  | -0.170431533 |
| ENSDART00000134868 | zgc:113314         | 1.966628384  | 1.545280953  | 2.058380505  | 1.451511877  |
| ENSDART00000134870 | si:ch1073-170o4.1  | 0.916491768  | 1.072144968  | 0.377684395  | 0.341437061  |
| ENSDART00000134890 | dusp11             | 0.272279441  | 0.221032047  | 0.049148172  | 0.030930206  |
| ENSDART00000134922 | kctd7              | -0.261930929 | -0.25302271  | -0.255500491 | -0.12435787  |
| ENSDART00000134924 | actb2              | 0.443688406  | 0.512853066  | 0.501918371  | 0.442049165  |
| ENSDART00000134934 | pag1               | -0.161885621 | -0.157851391 | -0.203479947 | -0.293661261 |
| ENSDART00000134941 | prc1b              | 1.557351387  | 1.026365943  | 0.57100162   | 0.47167284   |
| ENSDART00000134969 | rnd2               | -0.341329865 | -0.337414256 | -0.483308665 | -0.257319117 |
| ENSDART00000134973 | pcnxl2             | -0.772294262 | -0.54715302  | -0.00593982  | 0.313205165  |
| ENSDART00000135029 | BX927398.3         | 0.541935951  | 0.347132897  | 0.430074452  | 0.28825753   |
| ENSDART00000135032 | si:dkey-57a22.11   | 1.01281435   | 1.486077838  | 0.644934957  | 0.560278535  |
| ENSDART00000135052 | slc8a4a            | -0.449869312 | -0.676457859 | -0.284767037 | 0.064060964  |
| ENSDART00000135076 | scrn3              | 0.148271997  | -2.654959907 | 1.093269557  | 0.033366542  |
| ENSDART00000135093 | ola1               | 0.415909116  | 0.691871408  | 0.432580712  | -0.033470782 |
| ENSDART00000135118 | efr3ba             | -0.168363836 | -0.303586815 | -0.356914459 | -0.264543553 |
| ENSDART00000135125 | serp2              | 4.40213E-05  | 0.384051284  | 0.40863701   | 0.667539121  |
| ENSDART00000135133 | FRMD5 (1 of many)  | -0.238198919 | -0.442975354 | -0.623723948 | -0.410224766 |
| ENSDART00000135147 | si:ch211-218d20.15 | -0.111515958 | 0.398515484  | 0.749278715  | 0.887643411  |
| ENSDART00000135164 | pdcd6ip            | 0.194711079  | 0.272768586  | 0.208605784  | 0.054641806  |
| ENSDART00000135184 | pafah1b3           | 0.785314803  | 0.490699437  | 0.476757912  | 0.524529338  |
| ENSDART00000135206 | ppp6r2b            | -0.281142732 | -0.364406934 | -0.331381396 | -0.106942863 |
| ENSDART00000135230 | chd7               | 0.169349437  | 0.346809261  | 0.458651128  | 0.318074781  |
| ENSDART00000135238 | dok2               | 1.480525707  | 0.841647962  | 0.697333529  | 0.138703296  |
| ENSDART00000135248 | anxa13l            | 2.875521493  | 3.590436866  | 3.752911284  | 3.4448321    |
| ENSDART00000135256 | ubtd2              | 0.043462174  | 0.213810574  | 0.405778219  | 0.255726061  |
| ENSDART00000135284 | vsnl1a             | -0.802778535 | -0.782046001 | -0.520311896 | -0.04073792  |
| ENSDART00000135285 | clk2a              | 0.251961136  | 0.113407524  | 0.334958884  | 0.51104172   |
| ENSDART00000135337 | zgc:64189          | 0.108656283  | -0.42063095  | -0.437081395 | -0.295412247 |
| ENSDART00000135356 | nabp1a             | 0.371235634  | 0.392313666  | 0.26759026   | 0.229305948  |
| ENSDART00000135357 | si:ch211-220f16.2  | 3.87916704   | 3.441079612  | 2.990059648  | 3.744387905  |
| ENSDART00000135374 | ptpn21             | -0.060719081 | -0.163907746 | -0.321158981 | -0.096688483 |
| ENSDART00000135381 | six4a              | 2.521510715  | 2.3671408    | 2.587075649  | 1.691172374  |
| ENSDART00000135399 | phf11              | -0.105908519 | 0.331215825  | 2.01559672   | 0.351931859  |
| ENSDART00000135403 | nuak2              | -0.203159013 | -0.012266437 | -0.34684763  | -0.520334493 |
| ENSDART00000135415 | dysf               | 3.146286589  | 3.204629318  | 3.124686608  | 3.126558821  |
| ENSDART00000135431 | rabgap1l           | 1.914692926  | 2.028305841  | 2.310641205  | 1.631726628  |
| ENSDART00000135436 | jtb                | -0.083914092 | -0.13827795  | -0.410566521 | -0.208466854 |
| ENSDART00000135472 | zgc:86764          | 1.170468948  | 0.97326651   | 0.792803713  | 0.492808604  |
| ENSDART00000135475 | cadm2a             | -0.589549243 | -0.825400299 | -0.33568035  | 0.065563209  |
| ENSDART00000135479 | fstl5              | -0.187703631 | -0.312045142 | -0.413295205 | -0.11029682  |
| ENSDART00000135481 | si:ch211-67n3.9    | -0.264301646 | -0.482759797 | -0.356089399 | -0.148916978 |
| ENSDART00000135510 | syne2b             | -0.011968335 | -0.47360345  | -0.918119469 | -0.289310189 |
| ENSDART00000135513 | rgs6               | -0.368608418 | -0.140264684 | -0.010741291 | 0.084818744  |
| ENSDART00000135517 | cenpf              | 1.006357007  | 0.930294184  | 0.598168756  | 0.318387864  |
| ENSDART00000135556 | lonrf1             | -0.330548829 | 0.12250287   | -0.445965292 | -0.332349033 |
| ENSDART00000135569 | gale               | 0.396996119  | 0.386168327  | 0.425741481  | 0.058303999  |
| ENSDART00000135583 | mlpha              | 2.247424425  | 4.049714869  | 4.15888721   | 1.709523081  |
| ENSDART00000135587 | cd9a               | -0.312163633 | -0.264335113 | 0.189621918  | 0.343999271  |
| ENSDART00000135595 | mhc1zaa            | 0.19156418   | 1.036766333  | 0.760670357  | 0.331702215  |
| ENSDART00000135599 | lypla2             | -0.359594871 | -0.446096937 | -0.182980597 | -0.086611879 |

|                    |                  |              |              |              |              |
|--------------------|------------------|--------------|--------------|--------------|--------------|
| ENSDART00000135602 | si:ch73-290k24.6 | -0.456455854 | -0.524968049 | -0.128888416 | -0.002715321 |
| ENSDART00000135606 | TMEM269          | -0.06366918  | -0.165749005 | -0.266297774 | -0.18037018  |
| ENSDART00000135608 | gabrp            | -2.860562828 | -1.443836066 | -0.572564003 | -0.537301716 |
| ENSDART00000135624 | FAM163A          | -0.714036121 | -0.427639458 | -0.142310427 | 0.163241634  |
| ENSDART00000135631 | myl6             | 0.462877699  | 0.806124657  | 0.938068157  | 0.529055927  |
| ENSDART00000135661 | slc20a1a         | 1.716116201  | 1.644628019  | 1.747440585  | 0.991048186  |
| ENSDART00000135690 | lactbl1a         | -0.207283355 | -0.397072585 | -0.513557165 | -0.348206521 |
| ENSDART00000135692 | UNC13A           | -0.209420413 | -0.513653337 | -0.217224189 | 0.093101705  |
| ENSDART00000135702 | rgs11            | -0.576481143 | -0.793334647 | -0.383725367 | 0.048951277  |
| ENSDART00000135715 | fam184a          | -0.344643213 | -0.481218539 | -0.282456424 | 0.057932244  |
| ENSDART00000135719 | si:ch211-171h4.6 | 1.187005549  | 0.373648016  | 0.271137881  | -0.125827965 |
| ENSDART00000135730 | lrmp             | -0.028204227 | -0.338623204 | -0.590263694 | -0.109841967 |
| ENSDART00000135738 | zgc:194990       | 0.067005172  | -0.387370648 | -0.731552205 | -0.192679748 |
| ENSDART00000135756 | kirrel3a         | -0.197416496 | -0.816919597 | -0.348887933 | -0.004164348 |
| ENSDART00000135764 | si:dkey-70p6.1   | -0.54777588  | -0.724047584 | 0.062614493  | 0.292769909  |
| ENSDART00000135768 | lrp1ba           | -0.685782746 | -0.945707299 | -0.285013804 | 0.195853428  |
| ENSDART00000135781 | plcg1            | 0.270370473  | 0.251405726  | 0.297242892  | 0.117629016  |
| ENSDART00000135794 | sepn1            | 0.371752242  | 0.285638022  | 0.016731978  | -0.094169263 |
| ENSDART00000135811 | atp2b3a          | -0.361290503 | -0.436904447 | -0.166639435 | 0.060424957  |
| ENSDART00000135821 | mfsd6b           | 0.610408738  | 1.551908888  | 1.729395905  | 1.289342978  |
| ENSDART00000135860 | rnf41l           | -0.353446179 | -0.473576771 | -0.616364395 | -0.289592085 |
| ENSDART00000135888 | rrp9             | 0.649352382  | 0.396806051  | 0.419459571  | 0.067410678  |
| ENSDART00000135897 | tmeff2a          | -0.507501095 | -0.570530323 | -0.389897465 | -0.071849112 |
| ENSDART00000135919 | amd1             | -0.131714213 | -0.276160556 | -0.537901531 | -0.163925689 |
| ENSDART00000135965 | plch1            | -0.574356968 | -0.567600235 | -0.421755163 | -0.154028312 |
| ENSDART00000135973 | nfyal            | 0.202128253  | 0.401502491  | 0.256237772  | 0.346886156  |
| ENSDART00000135989 | cep170aa         | 0.062401976  | 0.336049788  | 0.4713762    | 0.353973795  |
| ENSDART00000136028 | CR753844.1       | 0.308802389  | 0.230251216  | 0.146560512  | 0.144442899  |
| ENSDART00000136049 | syt10            | -0.382437751 | -0.322146795 | -0.465356993 | -0.383104059 |
| ENSDART00000136084 | mfhas1           | -0.229093837 | -0.123648609 | -0.428888075 | -0.346098599 |
| ENSDART00000136091 | c1ql2            | -0.439731401 | -0.550972938 | -0.293500773 | -0.243598849 |
| ENSDART00000136103 | ubap2a           | 0.173955465  | 0.276885256  | 0.421817829  | 0.278699527  |
| ENSDART00000136123 | kdm6bb           | -0.32427763  | -0.244056677 | -0.170049978 | -0.028150527 |
| ENSDART00000136128 | FP016056.1       | -0.005351848 | -0.270043208 | -0.447280202 | -0.270195958 |
| ENSDART00000136141 | kcnq3            | -0.157652998 | 0.519381195  | 1.385651499  | 1.123132968  |
| ENSDART00000136152 | calua            | 0.347598327  | 0.562237059  | 0.505429013  | 0.302262295  |
| ENSDART00000136154 | gpr158a          | -0.522434846 | -0.680761714 | -0.064607745 | -0.081447185 |
| ENSDART00000136161 | faxcb            | -0.355434657 | -0.26288196  | 0.155305377  | 0.179364353  |
| ENSDART00000136182 | si:ch211-222n4.2 | 2.334818577  | 2.498262776  | 2.056155354  | 0.938824321  |
| ENSDART00000136187 | bloc1s4          | 0.27836522   | 0.479128543  | 0.397988078  | 0.159673351  |
| ENSDART00000136190 | si:ch211-133l5.7 | 0.046455816  | -0.284643729 | -0.455348095 | -0.512893839 |
| ENSDART00000136200 | cbln2b           | -0.48916567  | -0.352468034 | -0.442788192 | -0.14816736  |
| ENSDART00000136208 | ncam1b           | -0.292790209 | -0.308372802 | -0.421218735 | -0.19466435  |
| ENSDART00000136213 | bzw2             | 0.202381787  | -0.263816931 | -0.545867534 | -0.324585711 |
| ENSDART00000136233 | TENM3            | -0.571502608 | -0.593065001 | 0.242250375  | 0.436842415  |
| ENSDART00000136239 | kcnv2a           | -0.144268598 | -0.378520976 | -0.127025179 | 0.043873086  |
| ENSDART00000136255 | otofa            | -0.67545742  | -0.815938232 | -0.602392654 | -0.103624276 |
| ENSDART00000136267 | slc35f3b         | -0.474511888 | -0.87524613  | 0.142496146  | 0.506913479  |
| ENSDART00000136269 | rimbp2           | -0.196271668 | -0.410552217 | -0.160743106 | 0.064316711  |
| ENSDART00000136296 | CR847543.2       | 0.7189738    | 0.800339311  | 1.432214548  | 0.183639146  |
| ENSDART00000136314 | cthl             | 0.026768092  | 0.498239754  | -0.095502024 | -0.417996724 |

|                    |                   |              |              |              |              |
|--------------------|-------------------|--------------|--------------|--------------|--------------|
| ENSDART00000136377 | si:dkey-239h2.3   | -0.060598158 | -0.178560319 | -0.404445305 | -0.188298872 |
| ENSDART00000136378 | mb                | 0.060967695  | -0.006783267 | -0.887462271 | -1.204052153 |
| ENSDART00000136382 | gadd45ba          | 1.037707985  | 1.186135766  | 0.645465362  | 0.508629     |
| ENSDART00000136383 | cd99              | 0.67248236   | 1.035021667  | 0.666974643  | -0.164650894 |
| ENSDART00000136386 | si:ch211-210c8.7  | 0.436864275  | 0.595310791  | 0.386350533  | 0.024375719  |
| ENSDART00000136390 | hcn2b             | -0.288020893 | -0.351077892 | -0.312560003 | -0.049583355 |
| ENSDART00000136418 | sf3a1             | 0.245658224  | 0.479306215  | 0.291480298  | 0.207121133  |
| ENSDART00000136439 | bcl7a             | 0.000990732  | 0.374886928  | 0.452965996  | 0.230358497  |
| ENSDART00000136447 | si:dkey-161j23.7  | -0.523562694 | -0.013224352 | -0.081189145 | 0.161013961  |
| ENSDART00000136472 | trim3b            | -0.264051102 | -0.238034524 | -0.31432798  | -0.179272082 |
| ENSDART00000136488 | zmat4a            | -0.690962776 | -0.637104526 | -0.28999313  | -0.088561559 |
| ENSDART00000136492 | si:ch211-158d24.4 | 0.620322497  | 0.916930916  | 0.610223614  | 0.170743477  |
| ENSDART00000136497 | CR318624.1        | -0.290569983 | -0.906819744 | -0.441990313 | 0.029701559  |
| ENSDART00000136523 | CU467861.1        | 1.460403168  | 1.124457561  | 1.294733731  | 1.217332143  |
| ENSDART00000136538 | cish              | -0.292880454 | -0.45612089  | -0.971812918 | -1.16494411  |
| ENSDART00000136543 | tnni4b.1          | 1.504503498  | 0.982879899  | 0.857598266  | -0.145526765 |
| ENSDART00000136547 | rpl10a            | 0.572905103  | 0.588248568  | 0.30592141   | 0.14058962   |
| ENSDART00000136559 | ano8a             | -0.477178876 | -0.572871399 | -0.340924619 | -0.093243478 |
| ENSDART00000136578 | syn1              | -0.141221338 | -0.191909782 | 0.363564902  | 0.481540125  |
| ENSDART00000136592 | ckbb              | -0.985379774 | -1.268435214 | -0.989267529 | -0.749991465 |
| ENSDART00000136647 | ext1c             | -0.283149695 | -0.275883116 | -0.465218527 | -0.113484828 |
| ENSDART00000136649 | si:dkey-92i17.2   | 0.27365425   | 1.100188551  | 1.105138404  | 0.404606112  |
| ENSDART00000136653 | ccdc106b          | 0.176566138  | -0.096095881 | -1.050174868 | -0.31850308  |
| ENSDART00000136654 | grapb             | -0.34841027  | -0.721289328 | -0.501261917 | -0.353877694 |
| ENSDART00000136655 | ndufa3            | -0.198867993 | -0.196758365 | -0.355261116 | -0.136756127 |
| ENSDART00000136692 | ccnl1a            | 0.306138381  | 0.080789654  | -0.032909692 | 0.080389121  |
| ENSDART00000136695 | yrk               | 1.103276689  | 0.393392175  | 0.380351314  | -0.354474005 |
| ENSDART00000136700 | hunk              | 1.085007384  | 0.795931304  | 0.468549793  | 1.046395882  |
| ENSDART00000136707 | mical1            | -0.443299702 | -0.458390885 | 0.146469401  | 0.374257303  |
| ENSDART00000136708 | rbpms2b           | -1.024689498 | -0.80090545  | -0.103078191 | 0.159293341  |
| ENSDART00000136722 | cdkn1a            | 1.083504495  | 0.97819224   | 0.258587523  | 0.060123909  |
| ENSDART00000136726 | magi3b            | -0.381646177 | -0.461208385 | -0.226303301 | -0.080158554 |
| ENSDART00000136729 | ebf1b             | -2.79991744  | -3.068779235 | -0.720206417 | 0.313112936  |
| ENSDART00000136733 | glra1             | -0.259893278 | -0.432961012 | -0.409765299 | -0.248913141 |
| ENSDART00000136744 | foxq2             | -0.278235678 | -0.492834499 | -0.366505779 | -0.190958275 |
| ENSDART00000136754 | cdh13             | -0.587587145 | -0.627840519 | -0.172128457 | 0.142910694  |
| ENSDART00000136759 | prdm13            | -0.225066145 | -0.413438688 | -0.129520305 | 0.036146962  |
| ENSDART00000136761 | prkx              | 0.698491961  | 1.03323314   | 0.943847516  | 0.577218336  |
| ENSDART00000136770 | si:dkey-246e1.3   | -0.264481758 | -0.308595158 | -0.554881445 | -0.406535962 |
| ENSDART00000136771 | dnajc5ga          | -0.246041931 | -0.267357646 | -0.352933326 | -0.221144382 |
| ENSDART00000136779 | entpd5b           | 0.819562392  | 0.580844217  | 0.174817773  | -0.04896424  |
| ENSDART00000136782 | si:dkey-24c2.7    | 4.902793471  | 4.654641885  | 4.451812012  | 3.610899339  |
| ENSDART00000136789 | tjp2a             | -0.247782376 | -0.511487885 | -0.433268095 | -0.195886379 |
| ENSDART00000136797 | btbd10a           | -0.201172343 | -0.244946837 | 0.724827561  | 0.837222426  |
| ENSDART00000136805 | rbm10             | -4.539752918 | -3.15582054  | -1.19980751  | -2.046490722 |
| ENSDART00000136830 | stmn4l            | 1.323269884  | 1.682347243  | 1.639725976  | 1.096832109  |
| ENSDART00000136835 | gpr84             | 0.70622544   | 0.183343809  | -0.153052934 | -0.427967202 |
| ENSDART00000136836 | rab11fip3         | -0.285287519 | -0.130906101 | 0.115401989  | 0.056439488  |
| ENSDART00000136853 | fam163b           | -0.426911899 | -0.715978676 | -0.456698496 | -0.087825906 |
| ENSDART00000136865 | cfp               | 0.329536618  | 0.225136408  | -0.193120136 | -0.891420593 |
| ENSDART00000136873 | clasp2            | 0.301439566  | 0.245236713  | 0.309865242  | 0.356365378  |

|                    |                   |              |              |              |              |
|--------------------|-------------------|--------------|--------------|--------------|--------------|
| ENSDART00000136910 | armac1l           | 0.626427947  | 0.775572599  | 0.634581641  | 0.292392529  |
| ENSDART00000136914 | tpd52l2a          | -0.012405325 | -0.254912754 | -0.378255822 | -0.151435535 |
| ENSDART00000136943 | si:dkey-21e2.13   | 2.273396315  | 3.247336732  | 1.860650754  | 0.467276759  |
| ENSDART00000136977 | wdr11             | -0.244389043 | -0.296442513 | -0.19757682  | -0.033240657 |
| ENSDART00000137019 | cmklr1            | 1.293423342  | 0.826870113  | 0.435422926  | 0.179038361  |
| ENSDART00000137021 | cabp4             | -0.36160439  | -0.600623701 | -0.526609212 | -0.179412794 |
| ENSDART00000137026 | fam208ab          | -0.664193623 | -0.40965157  | -0.455043185 | -0.262800574 |
| ENSDART00000137036 | ppiaa             | 0.323927062  | 0.685997539  | 0.775560135  | 0.372712842  |
| ENSDART00000137037 | iqsec3b           | -0.405090433 | -0.576572578 | -0.30180595  | 0.030413937  |
| ENSDART00000137038 | asic2             | -0.373156822 | -0.72567768  | -0.446804249 | -0.152680828 |
| ENSDART00000137047 | scoca             | -0.178388629 | -0.216665672 | -0.49140437  | -0.218641566 |
| ENSDART00000137061 | klc1a             | -0.086604178 | 0.023703263  | 0.276488629  | 0.211488076  |
| ENSDART00000137083 | impq2a            | -0.438459919 | -0.214037195 | -0.28206161  | -0.025553958 |
| ENSDART00000137098 | impdh1a           | -0.236861779 | -0.534821929 | -0.182618892 | 0.088190256  |
| ENSDART00000137110 | sepw1             | 0.165066135  | 0.642417047  | 0.502149684  | 0.242826446  |
| ENSDART00000137131 | dnah7             | -0.559601026 | -0.233046623 | -0.366131677 | -0.080127176 |
| ENSDART00000137135 | mei4              | -0.382006481 | -0.256759987 | -1.043399236 | -0.457749266 |
| ENSDART00000137185 | cnga3b            | -0.145832564 | -0.301563517 | -1.136000666 | -0.708190865 |
| ENSDART00000137203 | ponzr6            | 2.803770034  | 2.268583293  | 2.342420518  | 1.869529587  |
| ENSDART00000137212 | dip2ca            | 0.131800934  | -0.026475424 | 0.308770191  | 0.394512532  |
| ENSDART00000137214 | gpm6bb            | -0.410929898 | -0.351705205 | -0.352631557 | -0.244368267 |
| ENSDART00000137228 | si:rp71-80o10.4   | -0.005305454 | 1.094390245  | 1.175846782  | 0.577915575  |
| ENSDART00000137236 | hpcal1            | -0.065446201 | -0.487196869 | -0.639863396 | -0.431847778 |
| ENSDART00000137262 | vdac3             | -0.257205324 | -0.141410703 | -0.061503392 | 0.052713477  |
| ENSDART00000137287 | pebp1             | -0.410574808 | -0.266170824 | -0.343257245 | -0.128567003 |
| ENSDART00000137291 | METTL18           | -0.209734106 | 0.269511362  | -2.440335414 | -0.139098945 |
| ENSDART00000137292 | tmem106bb         | -0.265825137 | -0.29210537  | -0.411370487 | -0.25270276  |
| ENSDART00000137293 | dia1b             | -0.377972932 | -0.365130624 | -0.231479469 | -0.228625621 |
| ENSDART00000137308 | plxnb1a           | 0.257511262  | 0.267128747  | 0.167145068  | 0.075399376  |
| ENSDART00000137309 | gemin5            | 0.29381973   | 0.279160353  | 0.398962684  | 0.210137956  |
| ENSDART00000137315 | rdh12             | -0.392438907 | -0.330126959 | 0.208728813  | 0.139463991  |
| ENSDART00000137325 | mvp               | 1.415505945  | 1.485945809  | 1.461661333  | 0.448751577  |
| ENSDART00000137332 | si:ch211-132g1.3  | -2.704437973 | -0.017410436 | -0.395377626 | -0.276512676 |
| ENSDART00000137353 | klhl17            | -0.368352542 | -0.314849207 | -0.039056928 | 0.155772163  |
| ENSDART00000137355 | tet3              | -0.245273707 | -0.407219331 | -0.050664281 | -0.06569376  |
| ENSDART00000137364 | si:dkey-33c12.3   | 0.174067673  | -0.534549963 | -0.496919129 | 0.189169246  |
| ENSDART00000137371 | atp8b3            | -0.113445648 | -0.348083251 | -0.436781891 | -0.110584084 |
| ENSDART00000137373 | si:ch211-266i6.3  | 1.973293451  | 1.253222026  | 0.772689981  | 0.242956342  |
| ENSDART00000137381 | khdrbs1b          | -0.12744256  | -0.621948205 | -0.491970892 | 0.090347508  |
| ENSDART00000137391 | celsr3            | 0.73044715   | 0.817745044  | 0.845582062  | 0.571451225  |
| ENSDART00000137418 | BX004774.2        | -0.041779011 | -0.239619277 | -0.711634051 | -0.543815741 |
| ENSDART00000137424 | c1qtnf4           | -0.387372103 | -0.312978581 | -0.242907328 | -0.243606392 |
| ENSDART00000137426 | gcgb              | -0.226806487 | -0.599969225 | -0.659481129 | -0.843993634 |
| ENSDART00000137443 | ANK1 (1 of many)  | -0.657062014 | -0.810024547 | -0.456200062 | -0.254232075 |
| ENSDART00000137471 | MFAP4 (1 of many) | 1.677720699  | 2.807166131  | 2.128226179  | 1.146528193  |
| ENSDART00000137485 | tpd52l1           | 0.045987753  | -0.292323377 | -0.626535278 | -0.266196407 |
| ENSDART00000137486 | klhl21            | 0.151379043  | 0.263264305  | 0.384374563  | 0.339611926  |
| ENSDART00000137505 | vamp1             | -0.431791589 | -0.393372103 | -0.433651273 | -0.142134375 |
| ENSDART00000137561 | ucp3              | 2.475646127  | 3.272328187  | 3.19387131   | 0.905806223  |
| ENSDART00000137572 | mpc1              | -0.077665143 | -0.162227554 | -0.29007527  | -0.035755645 |
| ENSDART00000137620 | si:ch73-46j18.5   | -0.071928647 | 0.074859157  | 0.409828499  | 0.45946174   |

|                    |                    |              |              |              |              |
|--------------------|--------------------|--------------|--------------|--------------|--------------|
| ENSDART00000137624 | eef2a.2            | 2.619194541  | 2.67605773   | 3.551783602  | 3.00375243   |
| ENSDART00000137628 | mthfd1l            | 3.69201835   | 0.840641874  | 3.245529647  | 1.343967089  |
| ENSDART00000137633 | si:ch211-194e15.5  | -0.00297372  | -0.215384681 | -0.930894546 | -0.593142383 |
| ENSDART00000137638 | si:ch73-25f10.6    | -0.304397619 | -0.080258192 | -0.006488078 | 0.003923632  |
| ENSDART00000137648 | si:dkeyp-123h10.2  | -0.55097741  | -0.596976893 | -0.447594093 | -0.275058949 |
| ENSDART00000137659 | cmpk2              | 0.149738862  | -0.572975919 | 2.540871599  | -0.412773402 |
| ENSDART00000137679 | sash1a             | 0.328343986  | -0.118753926 | -0.077897758 | -0.030798    |
| ENSDART00000137680 | BX663503.1         | -0.232606929 | -0.407355209 | -0.255389687 | -0.079162056 |
| ENSDART00000137728 | st6gal1            | -0.677667407 | -0.699420985 | -0.736040173 | -0.083670402 |
| ENSDART00000137756 | hecw2a             | -0.728856656 | -1.003560302 | -0.22088311  | 0.383324077  |
| ENSDART00000137757 | irf9               | 0.327252488  | 0.410367721  | 0.769408328  | 0.032820811  |
| ENSDART00000137782 | yif1a              | 0.379643142  | 0.667454267  | 0.241343175  | 0.280143891  |
| ENSDART00000137795 | ssrp1a             | 0.416335187  | 0.470997147  | 0.449691903  | 0.161896374  |
| ENSDART00000137799 | trim66             | -0.46849178  | -0.260779632 | 0.306613928  | 0.711500351  |
| ENSDART00000137817 | rap1gap2a          | -0.351211604 | -0.330279371 | -0.569882036 | -0.258477103 |
| ENSDART00000137848 | palmda             | -0.364561265 | -0.248835039 | -0.231952958 | -0.127331926 |
| ENSDART00000137851 | tfr1b              | 0.020013224  | -0.000851268 | 0.44833745   | 0.43610072   |
| ENSDART00000137858 | alpk2              | 0.667374473  | 0.189664169  | 0.047615444  | -0.048884335 |
| ENSDART00000137889 | ank1b              | -0.447220804 | -0.737203628 | 0.205089912  | 0.418795119  |
| ENSDART00000137896 | fibpb              | -0.042394017 | -0.144008268 | -0.458312875 | -0.18906893  |
| ENSDART00000137899 | tmem9              | -0.365732748 | -0.460492017 | -0.592427521 | -0.282793654 |
| ENSDART00000137900 | grin2ab            | -0.452993272 | -0.616161489 | 0.576592075  | 1.050321835  |
| ENSDART00000137903 | BX640512.2         | -0.158278671 | -0.01949183  | 1.915495669  | -0.120027797 |
| ENSDART00000137918 | bbc3               | 0.101268325  | 0.767629492  | 0.853650102  | 0.865966102  |
| ENSDART00000137920 | si:ch211-169p10.1  | -0.466773792 | -0.281022003 | 0.027119426  | -0.105594514 |
| ENSDART00000137967 | diras1b            | -0.821870921 | -0.072822932 | 0.659174512  | 0.085565822  |
| ENSDART00000137973 | grna               | 1.322360375  | 0.965948715  | 0.567189356  | -0.062803655 |
| ENSDART00000137984 | SBNO2 (1 of many)  | 0.66540874   | 0.705510404  | 0.683617676  | -0.079102756 |
| ENSDART00000138026 | gabra5             | -0.35782795  | -0.794620157 | 0.43219928   | 0.956240287  |
| ENSDART00000138045 | whsc1l1            | -0.152220762 | 0.158744769  | 0.494234043  | 0.50708853   |
| ENSDART00000138048 | pbx3b              | -0.599655595 | -0.602159282 | -0.228775798 | -0.019503135 |
| ENSDART00000138070 | mb                 | -0.127824671 | -0.447974107 | -0.919218534 | -1.274065689 |
| ENSDART00000138081 | bcl6ab             | 0.948060654  | 0.690527167  | 0.988530239  | 1.012261919  |
| ENSDART00000138094 | eef1b2             | 0.3943229    | 0.586163757  | 0.433468435  | 0.083803882  |
| ENSDART00000138116 | surf6              | 0.641305655  | 0.652953357  | 0.565146387  | 0.291720746  |
| ENSDART00000138120 | pbdc1              | 0.312703559  | 0.29678566   | 0.127166498  | 0.014012212  |
| ENSDART00000138139 | zgc:153157         | -0.590921601 | -0.369202687 | -0.339560998 | -0.377004198 |
| ENSDART00000138140 | SLC4A5 (1 of many) | -0.322967614 | -0.430634585 | -0.36463151  | -0.15311364  |
| ENSDART00000138143 | si:ch211-233m11.1  | 0.782546411  | 0.773895723  | 0.974137465  | 0.285762089  |
| ENSDART00000138174 | slc16a12b          | -0.100392011 | 0.567507799  | 1.765497005  | 0.866245296  |
| ENSDART00000138185 | gad1b              | -0.304744145 | -0.418178899 | -0.358818296 | -0.231950915 |
| ENSDART00000138192 | tnnt3b             | -0.439749688 | 3.945748378  | 4.736531723  | 2.568867245  |
| ENSDART00000138210 | ubac1              | -0.339032913 | -0.702323176 | -0.152684805 | 0.046765242  |
| ENSDART00000138216 | CR855311.1         | 1.84161592   | 1.501667665  | 0.707831526  | -0.102637826 |
| ENSDART00000138223 | si:ch211-71m22.1   | 0.850777626  | 0.641874022  | 1.554600154  | -0.004827675 |
| ENSDART00000138232 | arl13a             | -0.123428499 | -0.297389057 | -0.827109894 | -0.393133456 |
| ENSDART00000138240 | tpt1               | 2.855871394  | 2.728090369  | 3.227118826  | 0.916859453  |
| ENSDART00000138246 | EMB                | -0.957103253 | -1.089886746 | -0.283796575 | 0.121320475  |
| ENSDART00000138270 | copz2              | -0.133761169 | -0.127273242 | -0.35316272  | -0.169760508 |
| ENSDART00000138289 | prex1              | -0.517788451 | -0.174645698 | -0.909102985 | -0.603337454 |
| ENSDART00000138294 | rab41              | -0.246606124 | -0.179576466 | 0.274617961  | 0.438688085  |



|                    |                   |              |              |              |              |
|--------------------|-------------------|--------------|--------------|--------------|--------------|
| ENSDART00000138303 | si:dkey-23c22.9   | 0.616317614  | 0.5640973    | 0.527774625  | 0.331889659  |
| ENSDART00000138308 | gpr186            | -1.473279373 | -0.953004046 | -1.169373422 | -1.314238919 |
| ENSDART00000138312 | zbtb18            | -0.233659879 | -0.456610703 | -0.155318743 | 0.01760237   |
| ENSDART00000138321 | parp12b           | 0.255975647  | 0.107710029  | 0.742615255  | 0.386793554  |
| ENSDART00000138328 | xpo6              | 0.06358993   | 0.090933498  | 0.285770037  | 0.126601033  |
| ENSDART00000138334 | ppp2r2ab          | -0.498478384 | -0.353284175 | -0.096797126 | -0.036101553 |
| ENSDART00000138350 | rps12             | 0.592717981  | 0.744811164  | 0.572850481  | 0.279364485  |
| ENSDART00000138351 | cth               | 1.012814265  | 1.438428325  | 1.066275824  | 0.495805428  |
| ENSDART00000138404 | si:ch211-199g17.2 | 1.114605772  | 0.829720741  | 1.042136455  | 0.129449804  |
| ENSDART00000138412 | acbd5a            | 0.434518843  | 0.610473848  | 0.985396736  | 0.824271669  |
| ENSDART00000138415 | rnf207b           | 0.16648554   | 0.461805711  | 0.480213875  | 0.411411872  |
| ENSDART00000138432 | cul2              | 0.103145244  | 0.093005828  | 0.308783998  | 0.205589181  |
| ENSDART00000138475 | sorbs2a           | -0.319831096 | -0.27540368  | -0.20838001  | -0.137765232 |
| ENSDART00000138477 | BX571945.1        | -0.597559877 | -0.845904193 | -0.62766334  | -0.501592231 |
| ENSDART00000138527 | rab20             | 0.632157851  | 0.410164386  | 0.278506263  | 0.009483031  |
| ENSDART00000138540 | ttyh1             | -0.563796304 | -0.437755604 | -0.092270149 | 0.165178407  |
| ENSDART00000138541 | rprip1            | -0.096214383 | -0.271667846 | -0.617065899 | -0.286110235 |
| ENSDART00000138606 | las1l             | 0.170918093  | 0.302723725  | 0.361920168  | 0.174466647  |
| ENSDART00000138621 | zgc:153867        | 3.188427096  | 3.682050782  | 3.111570491  | 2.809604178  |
| ENSDART00000138633 | cd99              | 1.201301736  | 1.818711588  | 1.295470825  | 0.581149232  |
| ENSDART00000138658 | si:ch211-117m20.4 | -0.301116828 | -0.255854166 | -0.65213458  | -0.329202684 |
| ENSDART00000138661 | tspan11           | -0.312645804 | -0.301551652 | -0.855364566 | -0.684847545 |
| ENSDART00000138687 | ppp1r9a           | -0.410087357 | -0.337226328 | -0.257566135 | -0.006942521 |
| ENSDART00000138695 | ank1b             | -0.498943842 | -0.553539638 | -0.03799849  | 0.33423854   |
| ENSDART00000138703 | trpc7a            | -0.333459575 | -0.723289936 | -0.168085186 | -0.375723791 |
| ENSDART00000138714 | sult5a1           | 2.445310663  | 3.836816007  | 1.972331729  | 2.072167418  |
| ENSDART00000138719 | cyp3c4            | -2.572466969 | -4.228419984 | 0.354827699  | -0.36271005  |
| ENSDART00000138733 | cdh12a            | -0.402719414 | -0.467471363 | -0.247597318 | -0.111519505 |
| ENSDART00000138747 | urb2              | 0.51682098   | 0.426109616  | 0.379169845  | 0.148916896  |
| ENSDART00000138755 | dclk1a            | -0.464513032 | -0.326162873 | -0.241704881 | -0.01162875  |
| ENSDART00000138759 | clta              | -0.330987711 | -0.247185854 | 1.110067577  | 0.98649153   |
| ENSDART00000138769 | cdh24b            | -0.290981343 | -0.436100905 | -0.352222227 | -0.098902248 |
| ENSDART00000138793 | si:ch211-203k16.3 | -0.114803625 | -0.341143223 | -0.894722004 | -0.064858026 |
| ENSDART00000138820 | lrtm2a            | -0.205456304 | -0.473378158 | -0.285055681 | -0.252340958 |
| ENSDART00000138821 | nfil3             | 1.376309909  | 2.121391468  | 1.99718084   | 1.39511595   |
| ENSDART00000138822 | SSBP4 (1 of many) | -0.268549166 | -0.417362634 | -0.271649078 | -0.060566364 |
| ENSDART00000138834 | mab21l3           | -0.591171056 | -0.506133859 | -0.165242719 | -0.104286764 |
| ENSDART00000138845 | BX571724.1        | -0.626541209 | -0.809565722 | -0.893218772 | -2.725413714 |
| ENSDART00000138850 | cacna2d2b         | -0.226630579 | -0.433395437 | -0.06209639  | 0.11961013   |
| ENSDART00000138866 | pbxip1a           | -0.45481847  | -0.358362517 | -0.587330976 | -0.331438505 |
| ENSDART00000138878 | ndufaf5           | -0.068766975 | -0.169285384 | -0.3114844   | -0.186576816 |
| ENSDART00000138890 | kcnd2             | -0.399063976 | -0.347742148 | -0.33423415  | -0.044907554 |
| ENSDART00000138895 | igsf9ba           | -0.084504285 | -0.116086258 | 0.293952477  | 0.264801901  |
| ENSDART00000138915 | cirbpb            | 0.297824374  | 0.314736859  | 0.24846932   | 0.269446209  |
| ENSDART00000138922 | elovl8a           | -0.299886352 | -0.255106336 | -0.59316691  | -0.339691401 |
| ENSDART00000138954 | plekha1b          | -0.288171631 | -0.266395551 | 0.185168153  | 0.476938782  |
| ENSDART00000138963 | rcan1a            | 0.723709877  | 0.557125789  | 0.817932454  | 0.892580049  |
| ENSDART00000138995 | vps9d1            | 0.170379692  | -2.63011314  | -0.343991992 | -0.469718482 |
| ENSDART00000138996 | si:ch211-214p13.9 | 1.396990228  | 1.323446174  | 0.865221946  | -0.306555509 |
| ENSDART00000139002 | dus2              | 0.373595906  | 0.357863942  | 0.47349873   | 0.230284081  |
| ENSDART00000139033 | lrp1bb            | -0.300129828 | -0.380241873 | -0.239929923 | -0.108887683 |

|                    |                   |              |              |              |              |
|--------------------|-------------------|--------------|--------------|--------------|--------------|
| ENSDART00000139035 | si:ch211-215c18.3 | -1.205532305 | -0.512285433 | 0.437440349  | 0.984798646  |
| ENSDART00000139038 | CU467861.1        | 1.207959792  | 0.605422627  | 0.760051253  | 0.598045855  |
| ENSDART00000139042 | si:ch211-132b12.7 | 0.072730857  | -0.322841214 | -0.765244522 | -0.309126323 |
| ENSDART00000139048 | gl5b              | -0.011350798 | -0.181323189 | -0.40931902  | -0.142239159 |
| ENSDART00000139069 | decr1             | 0.368869625  | 0.410230162  | -0.003538468 | -0.070408167 |
| ENSDART00000139087 | lgnn              | 0.782730519  | 0.338051823  | 0.153128345  | -0.09953272  |
| ENSDART00000139102 | dbpb              | 0.113164671  | -0.364559303 | -0.423196921 | -0.137052116 |
| ENSDART00000139124 | ckba              | 1.776728636  | 1.213212461  | 1.201789834  | 0.178980804  |
| ENSDART00000139132 | steap3            | 0.144648286  | 0.301641021  | 0.828461526  | -0.036698505 |
| ENSDART00000139151 | si:ch211-193k19.1 | 1.470035909  | 0.356445905  | 0.995091982  | 1.049578611  |
| ENSDART00000139174 | fam46c            | -0.16066992  | -0.125475027 | -0.118453643 | -0.616919987 |
| ENSDART00000139176 | eif2s3            | 0.381558608  | 0.49753559   | 0.407153714  | 0.243011405  |
| ENSDART00000139178 | slc25a14          | -0.405048408 | -0.151867564 | -0.020130795 | 0.082212943  |
| ENSDART00000139191 | trpc1             | -0.495478264 | -0.440776327 | -0.289497882 | -0.094213915 |
| ENSDART00000139196 | kif1ab            | -0.338072705 | -0.653527626 | -0.314444638 | -0.193117382 |
| ENSDART00000139237 | ret               | -0.448934402 | -0.273383642 | -0.43725639  | -0.287562193 |
| ENSDART00000139241 | rnf38             | 0.363207367  | 0.385948281  | 0.537494883  | 0.39766179   |
| ENSDART00000139259 | zfand5b           | 0.677389122  | 0.588881516  | 0.462655957  | 0.625250498  |
| ENSDART00000139265 | si:ch211-12e13.12 | -0.4797238   | -0.27645528  | 0.604278273  | 0.83384752   |
| ENSDART00000139279 | rbpms2b           | -0.774960547 | -0.830410704 | 0.12323811   | 0.508122144  |
| ENSDART00000139299 | zgc:162928        | 0.559235647  | 0.580335587  | 1.258831581  | 1.081287075  |
| ENSDART00000139310 | bcat2             | -0.180902608 | -0.445596686 | -0.579108461 | -0.343900677 |
| ENSDART00000139324 | si:dkeyp-41f9.3   | -0.154282935 | -0.395797654 | -0.452635792 | -0.310260961 |
| ENSDART00000139329 | cry-dash          | -0.104880347 | 0.380813844  | -0.32837694  | -0.194368371 |
| ENSDART00000139339 | mrpl34            | -0.322878188 | -0.414873817 | -0.404846888 | -0.143871621 |
| ENSDART00000139368 | atp1b1a           | 1.877087153  | 1.808227818  | 1.283859651  | 0.966677715  |
| ENSDART00000139387 | atp1b1b           | -0.121937317 | 0.340318468  | 0.40085255   | 0.510906972  |
| ENSDART00000139392 | rras              | 2.928045636  | 3.065800127  | 2.84735064   | 1.624630606  |
| ENSDART00000139412 | SMIM18            | 0.730335352  | 0.956017708  | 0.99931328   | 0.671209714  |
| ENSDART00000139448 | GALNTL6           | -0.494238764 | -0.383984121 | -0.129586789 | 0.079582323  |
| ENSDART00000139449 | si:dkey-147f3.4   | 1.865073313  | 2.098559635  | 1.808022762  | 0.571602171  |
| ENSDART00000139452 | pde4d             | 0.066848851  | -0.561165148 | -0.294908352 | 0.123175575  |
| ENSDART00000139454 | pde4cb            | 0.616688899  | 0.67005432   | 0.986689732  | 0.473877974  |
| ENSDART00000139461 | spock3            | -0.122253969 | -0.220033244 | -0.389207603 | -0.090203867 |
| ENSDART00000139464 | CU467861.1        | 0.786254771  | 0.561892643  | 0.40560384   | 0.357004849  |
| ENSDART00000139475 | samd10b           | -0.569533963 | -0.524261904 | -0.125238267 | -0.046566236 |
| ENSDART00000139477 | trim110           | -0.21821102  | -0.289321848 | -0.373728133 | -0.159590708 |
| ENSDART00000139479 | slc12a9           | 0.435405363  | 0.483188456  | 0.53485188   | 0.300178427  |
| ENSDART00000139493 | olfm1b            | -0.400757951 | -0.50188464  | -0.148663949 | 0.07973127   |
| ENSDART00000139514 | ano11             | -1.063704055 | -1.17363318  | -0.628817004 | -0.055546726 |
| ENSDART00000139517 | bbs4              | -0.163398089 | -0.230989705 | -0.424869507 | -0.049448344 |
| ENSDART00000139560 | ppp3r1a           | -0.205912354 | -0.312380575 | -0.194151002 | 0.010760735  |
| ENSDART00000139565 | L3MBTL4           | -0.137141942 | -0.164863308 | -0.259223674 | -0.097063711 |
| ENSDART00000139568 | nsmfa             | -0.224590353 | -0.433156538 | -0.157442583 | -0.141070436 |
| ENSDART00000139569 | zgc:92658         | -0.993075003 | -0.842810673 | -0.747118722 | -0.361693255 |
| ENSDART00000139596 | adarb2            | -0.297400744 | -0.411863485 | -0.163774062 | -0.140762569 |
| ENSDART00000139608 | upf3a             | -0.436308546 | -0.475063889 | -0.33694709  | -0.215591369 |
| ENSDART00000139623 | si:dkey-85k15.6   | 1.245336652  | 2.138651628  | 1.967890086  | 1.386101724  |
| ENSDART00000139633 | pip4k2ab          | -0.336773688 | -0.358059228 | -0.306910553 | -0.048531465 |
| ENSDART00000139644 | lin7b             | -0.266884847 | 0.193113139  | -0.021741296 | 0.002335697  |
| ENSDART00000139659 | si:dkey-222f2.7   | 1.108120911  | 0.818052369  | 0.396214124  | -0.100365974 |

|                    |                   |              |              |              |              |
|--------------------|-------------------|--------------|--------------|--------------|--------------|
| ENSDART00000139668 | sept8a            | 1.681949125  | 2.926818092  | 4.206471175  | 2.971436039  |
| ENSDART00000139677 | si:ch211-274p24.4 | -0.523882432 | -0.343944487 | -0.011557753 | 0.069892959  |
| ENSDART00000139682 | eps8l3b           | 1.489223017  | 0.930088019  | 0.068279636  | -0.057094698 |
| ENSDART00000139684 | lypla2            | -0.275250904 | -0.278688664 | -0.279438301 | -0.171299302 |
| ENSDART00000139701 | zfand5a           | -0.357581428 | -0.278083252 | -0.905903537 | -0.782247372 |
| ENSDART00000139702 | casp3a            | 0.559260909  | 1.157211853  | 1.445414898  | 1.128298777  |
| ENSDART00000139715 | dpm3              | -0.11194386  | -0.125527265 | -0.41579896  | -0.188378465 |
| ENSDART00000139722 | dmtn              | 1.105433633  | 1.577455563  | 1.872515003  | 1.217364091  |
| ENSDART00000139727 | si:dkey-14o18.2   | -0.196190231 | -0.516815682 | -0.462096519 | -0.093362239 |
| ENSDART00000139763 | stat5a            | 3.442434617  | 3.964844196  | 3.417693165  | 3.322184683  |
| ENSDART00000139793 | BX324164.1        | -0.743832764 | -0.340035488 | -0.551790628 | -0.137670464 |
| ENSDART00000139795 | syt2a             | -0.704240682 | -0.905957314 | -0.438675098 | 0.054000022  |
| ENSDART00000139796 | BX276103.2        | 0.569427954  | 0.391382554  | 0.350830467  | 0.475593369  |
| ENSDART00000139834 | mybpha            | -0.819804571 | 2.682359397  | 3.592112028  | 2.697092568  |
| ENSDART00000139839 | rbmx              | 0.438924108  | 0.178102249  | 0.089667681  | 0.22023097   |
| ENSDART00000139841 | gabrb1            | -0.439523493 | -0.431067027 | -0.18481289  | 0.263500104  |
| ENSDART00000139863 | dcblid2           | 0.210663919  | 0.284613411  | 0.515685864  | 0.299926066  |
| ENSDART00000139872 | oip5-as1          | -0.165940131 | -0.248925583 | -0.345111453 | -0.229952519 |
| ENSDART00000139892 | elfn2a            | 0.520234542  | 0.439147218  | 0.642970325  | 0.553931258  |
| ENSDART00000139893 | kcnma1a           | -0.580697526 | -0.766998113 | -0.101431021 | -0.110885596 |
| ENSDART00000139900 | diaph3            | 0.052388836  | -0.258521684 | -0.529199016 | -0.186043701 |
| ENSDART00000139917 | myha              | 0.315818594  | 4.091377824  | 5.948901319  | 4.44901869   |
| ENSDART00000139937 | frmpd1a           | -0.391315372 | -0.461157908 | -0.442405648 | -0.041073617 |
| ENSDART00000139947 | rapgef1a          | 0.201307435  | 0.3482683    | 0.17911742   | 0.096155984  |
| ENSDART00000139954 | BX005364.1        | -0.374788931 | -0.616534875 | -0.121001872 | 0.068005074  |
| ENSDART00000139964 | rps27.2           | 1.536999183  | 2.160860082  | 1.306857449  | 1.796586172  |
| ENSDART00000139994 | bbx               | -0.232049516 | -0.386470684 | -0.08432371  | -0.161403736 |
| ENSDART00000140026 | smarcd3a          | -0.62517615  | -0.573651045 | 0.020278487  | 0.08791531   |
| ENSDART00000140028 | lrrc4.1           | -0.491138395 | -0.422849217 | -0.374271959 | -0.216352385 |
| ENSDART00000140032 | si:dkeyp-69c1.9   | 1.662700986  | 3.288206015  | 1.780235269  | 1.584891446  |
| ENSDART00000140058 | zgc:153867        | -0.784474297 | -0.55629273  | 0.467767396  | 0.765384352  |
| ENSDART00000140086 | SUN2              | 0.64389802   | 0.258658486  | -0.305248612 | -0.209793481 |
| ENSDART00000140089 | cngb1a            | -0.120444883 | -0.269286081 | -0.242009625 | -0.11168715  |
| ENSDART00000140133 | ldhbb             | -1.001178594 | -1.13585969  | -1.022737795 | -0.597954004 |
| ENSDART00000140136 | soga3b            | -0.191550416 | -0.105037683 | 0.304311303  | 0.351545117  |
| ENSDART00000140145 | ajap1             | -0.237572949 | -0.464416488 | -0.62912768  | -0.262821389 |
| ENSDART00000140153 | mri1              | 1.105039291  | 1.085223643  | 1.409079861  | 0.961058569  |
| ENSDART00000140161 | necab2            | -0.820451686 | -0.597146212 | 0.232199679  | 0.59216621   |
| ENSDART00000140201 | cct8              | -0.644125552 | -3.075796442 | 0.532907513  | 0.591603801  |
| ENSDART00000140213 | npas1             | -0.414273238 | -0.495063512 | -0.247065017 | -0.227188437 |
| ENSDART00000140220 | si:ch211-168k14.2 | -0.180662482 | -0.408562234 | -0.217555172 | -0.18329178  |
| ENSDART00000140226 | CYTH2             | 0.074864847  | 0.258157093  | 0.345085089  | 0.148251292  |
| ENSDART00000140230 | zgc:123068        | 0.653257046  | 0.043755773  | 2.027002482  | 0.024521261  |
| ENSDART00000140253 | arhgef10lb        | 0.447026855  | 0.470705895  | 0.502550702  | 0.280062014  |
| ENSDART00000140255 | si:dkey-12h9.6    | 0.01002873   | 0.192183301  | 0.434559619  | 0.43853246   |
| ENSDART00000140284 | zbtb16a           | 2.407975491  | 2.022869932  | 2.341949009  | 2.679474288  |
| ENSDART00000140301 | TTC9              | 0.099722728  | 0.582192427  | 0.813799221  | 0.513650171  |
| ENSDART00000140302 | naca              | 0.278198217  | -2.435431446 | -4.196452356 | -2.112057753 |
| ENSDART00000140365 | slc12a5b          | -0.506920714 | -0.535232712 | -0.246533716 | 0.015331251  |
| ENSDART00000140375 | zfyve27           | -0.214217108 | -0.191210439 | -0.353015645 | -0.21311838  |
| ENSDART00000140422 | slmapb            | -0.858203956 | -0.622061933 | -0.375625924 | 0.17086689   |

|                    |                   |              |              |              |              |
|--------------------|-------------------|--------------|--------------|--------------|--------------|
| ENSDART00000140430 | ssx2ipb           | -4.013140014 | 0.070172399  | -2.728976212 | -1.746786541 |
| ENSDART00000140436 | map2              | -0.405015536 | -0.195771527 | -0.230781013 | 0.041022881  |
| ENSDART00000140448 | c1ql4a            | -0.329031661 | -0.450164426 | -0.498485743 | -0.359733933 |
| ENSDART00000140469 | deptor            | -0.370280506 | -0.334232129 | -0.271445752 | -0.25182283  |
| ENSDART00000140476 | atp6v0a2a         | -0.389741082 | 0.011917076  | 0.174652763  | 0.265809184  |
| ENSDART00000140481 | nfu1              | -0.046571941 | -0.14924591  | -0.367699445 | -0.24132739  |
| ENSDART00000140490 | MFP4 (1 of many)  | 1.29105804   | 2.228445007  | 1.795046858  | 1.318796638  |
| ENSDART00000140523 | mrc1b             | 0.693910087  | 0.60918831   | 0.270261416  | -0.09789336  |
| ENSDART00000140537 | dhrs11a           | 0.251388963  | 0.647205288  | 0.714640117  | 0.4437028    |
| ENSDART00000140540 | si:ch211-241e1.3  | 0.461435917  | 0.712590644  | 1.616566418  | 0.894218174  |
| ENSDART00000140553 | frmpd1a           | -0.279082186 | -0.31970424  | -0.46726564  | -0.019879501 |
| ENSDART00000140575 | map4l             | -0.647123698 | -0.438384786 | -0.184748643 | -0.024632978 |
| ENSDART00000140586 | col1a1a           | 0.136049595  | 0.737681947  | 1.130025782  | 0.5982928    |
| ENSDART00000140615 | cry1ba            | -0.093526328 | 0.597915555  | 0.380272469  | 0.502019284  |
| ENSDART00000140632 | bcl2l13           | -0.49849375  | -0.354616708 | -0.335413941 | -0.223271321 |
| ENSDART00000140645 | si:ch211-69e5.1   | 0.001617087  | -0.376948151 | -0.916309926 | -0.180025883 |
| ENSDART00000140650 | ankrd6b           | -0.31619699  | -0.471630097 | -0.512160686 | -0.029088129 |
| ENSDART00000140667 | spna2             | 0.558956985  | 0.663728247  | 0.276626138  | 0.347556663  |
| ENSDART00000140694 | eif4a1a           | 0.811760097  | 0.762478852  | 0.622630963  | 0.570594418  |
| ENSDART00000140695 | cdca7a            | 1.06377599   | 0.897895687  | 0.374788915  | 0.044135144  |
| ENSDART00000140711 | tbc1d5            | 0.254578098  | 0.244282662  | 0.119026019  | -0.013937387 |
| ENSDART00000140718 | sdhc              | -0.135426633 | -0.207907336 | -0.390001522 | -0.128998947 |
| ENSDART00000140736 | si:dkey-42i9.6    | 0.573524661  | 0.712949488  | 0.985257189  | 0.193370375  |
| ENSDART00000140739 | lrrc4bb           | -0.565179268 | -0.464872302 | -0.152447222 | -0.079782637 |
| ENSDART00000140764 | si:ch211-262h13.3 | 0.50717215   | 0.501857896  | 0.472590221  | 0.360293055  |
| ENSDART00000140776 | CR391940.1        | 0.57109507   | 0.234979352  | 0.004616304  | -0.046528801 |
| ENSDART00000140779 | fundc1            | -1.365145935 | -0.380101108 | -0.950161557 | -1.079798871 |
| ENSDART00000140782 | proza             | -0.315906897 | -0.22277663  | -0.304920909 | -0.22580936  |
| ENSDART00000140786 | qtrtd1            | 0.520156295  | 0.318813771  | 0.348267514  | 0.13612068   |
| ENSDART00000140788 | gbp1              | 3.129821614  | 2.838243862  | 2.757243294  | 2.490411238  |
| ENSDART00000140819 | rgmd              | -0.726396179 | -0.581866824 | -0.277540481 | -0.271416627 |
| ENSDART00000140827 | bcl11ab           | -0.293093875 | -0.330078462 | 0.796150714  | 1.216507448  |
| ENSDART00000140828 | CU179758.1        | -0.432947507 | -0.14249918  | -0.435392677 | -0.381420161 |
| ENSDART00000140852 | rgcc              | 1.458728484  | 1.527927815  | 1.077034908  | 0.967514776  |
| ENSDART00000140874 | seph              | 0.619876107  | 0.651122471  | 0.195858296  | -0.082542729 |
| ENSDART00000140875 | zgc:123010        | 0.555608218  | 0.491589354  | 0.22352835   | -0.077508349 |
| ENSDART00000140897 | larp6             | 0.136488111  | 0.20186899   | 0.305132975  | 0.028670036  |
| ENSDART00000140908 | gse1              | 0.266945251  | 0.781532641  | 1.123032019  | 0.70398488   |
| ENSDART00000140920 | prom1b            | 0.88825196   | 0.404698565  | 0.393910982  | 0.372363663  |
| ENSDART00000140940 | cluhb             | -1.005907144 | -1.058846619 | 1.005581701  | -0.029667711 |
| ENSDART00000140970 | si:ch73-52p7.1    | 1.046367332  | 0.798731839  | 0.265928239  | -0.108652338 |
| ENSDART00000140995 | mfsd2b            | -0.430905256 | -0.255202968 | -0.49728314  | -0.134050367 |
| ENSDART00000141030 | pde4ca            | -0.308097694 | -0.281644648 | -0.391359015 | -0.416436171 |
| ENSDART00000141031 | BX004774.2        | -0.096197487 | -0.455215086 | -0.947274727 | -0.721728098 |
| ENSDART00000141062 | man2b1            | 2.731854161  | 3.054858723  | 3.461869821  | 2.8427063    |
| ENSDART00000141068 | sox11b            | 1.611838536  | 2.177304965  | 2.010624009  | 1.194765222  |
| ENSDART00000141086 | robo2             | -0.237929535 | -0.432116468 | -0.02855362  | 0.131332743  |
| ENSDART00000141087 | crema             | 0.064696008  | -0.100227063 | -0.477732232 | -0.233875873 |
| ENSDART00000141103 | gfra4a            | -0.446789167 | -0.472299982 | -0.170582645 | 0.04427624   |
| ENSDART00000141107 | cd99              | 2.277092862  | 3.207492883  | 2.696592348  | 2.108764519  |
| ENSDART00000141110 | rpl10a            | 0.638320568  | 0.343299632  | 0.070055535  | 0.288835787  |

|                    |                   |              |              |              |              |
|--------------------|-------------------|--------------|--------------|--------------|--------------|
| ENSDART00000141132 | ppp6r2b           | -0.175401955 | -0.328399574 | -0.337567841 | -0.076173198 |
| ENSDART00000141142 | mvp               | 1.187603651  | 1.369710798  | 0.919014152  | 0.045597494  |
| ENSDART00000141157 | ablim3            | -0.090063728 | -0.09247473  | -0.384522771 | 0.048083962  |
| ENSDART00000141173 | elavl4            | 2.4638469    | 2.569363943  | 2.090923257  | 1.273250901  |
| ENSDART00000141177 | slc24a4a          | -0.524899894 | -0.691002096 | -0.394086808 | -0.038902918 |
| ENSDART00000141188 | st3gal3b          | 0.577420785  | 0.203550656  | -0.28232291  | -0.213031688 |
| ENSDART00000141193 | clu               | -0.012066925 | 0.064405046  | -0.155611703 | -0.357238215 |
| ENSDART00000141194 | mpp4a             | -0.333593633 | -0.165171491 | -0.10082691  | 0.099007973  |
| ENSDART00000141224 | rpl4              | 0.608116905  | 0.375484686  | 0.195287178  | 0.211394215  |
| ENSDART00000141227 | anxa13l           | -1.29005108  | 2.955855077  | 2.234819741  | 2.935945321  |
| ENSDART00000141231 | si:dkey-18a10.3   | -0.291486428 | -0.180620296 | -0.412941733 | -0.186503605 |
| ENSDART00000141237 | si:dkeyp-113d7.10 | -0.138953924 | 0.055420663  | 0.3781204    | 0.217616879  |
| ENSDART00000141238 | sdk1b             | -0.289169472 | -0.436527814 | -0.423787237 | -0.252263885 |
| ENSDART00000141263 | ENKD1             | -0.178779434 | -0.320320795 | -0.370791775 | -0.057231507 |
| ENSDART00000141265 | znf106b           | 0.649691237  | 0.737898777  | 0.38852404   | 0.011375685  |
| ENSDART00000141278 | si:ch211-14c7.2   | 0.247729936  | 0.220022891  | 0.550240269  | 0.375370237  |
| ENSDART00000141328 | pip5kl1           | 0.719167688  | 0.681103792  | 0.759572826  | 0.613914474  |
| ENSDART00000141338 | enc1              | 0.132252305  | 0.206249243  | 0.415692262  | 0.451357063  |
| ENSDART00000141340 | si:dkey-183n20.15 | -0.434296772 | -0.549401302 | -1.33032419  | -0.748989345 |
| ENSDART00000141345 | si:ch211-133l5.7  | 0.067098833  | -0.266407921 | -0.458017208 | -0.557765253 |
| ENSDART00000141367 | si:ch211-238n5.4  | -0.027130317 | 0.13157615   | 0.368504617  | 0.417326096  |
| ENSDART00000141373 | si:rp71-36a1.1    | 0.482287147  | 0.869957532  | 0.833507441  | 0.171228281  |
| ENSDART00000141382 | rab34b            | 1.020539104  | 1.398669915  | 1.148932644  | 0.356641036  |
| ENSDART00000141385 | si:dkey-27p18.3   | 0.644114707  | 0.569712036  | 1.095314507  | 0.257528776  |
| ENSDART00000141387 | mtus2a            | -0.19505707  | -0.297253066 | -0.281123654 | -0.028898398 |
| ENSDART00000141397 | ube2e1            | 0.445794988  | 0.509089566  | 0.636760169  | 0.02502865   |
| ENSDART00000141401 | arhgap12b         | -0.092120969 | -0.196587501 | -0.494285673 | -0.272796913 |
| ENSDART00000141421 | flna              | 2.437429319  | 2.513695725  | 2.398098837  | 2.160679529  |
| ENSDART00000141437 | sdc2              | 0.001568967  | 0.007072686  | -0.196613876 | -0.36025161  |
| ENSDART00000141444 | abcg4a            | -0.060112999 | 0.269266665  | 0.721083006  | 0.688157505  |
| ENSDART00000141446 | coro1cb           | -0.332235831 | 0.115994662  | 0.453423489  | 0.231540088  |
| ENSDART00000141487 | pvr13b            | -0.333456043 | -0.273917158 | -0.488003853 | -0.734425178 |
| ENSDART00000141493 | ANO2 (1 of many)  | 0.056182997  | -0.29662332  | -0.7863422   | -0.307277237 |
| ENSDART00000141553 | pfkfb1            | -0.184104594 | -0.132769648 | -0.647913533 | -0.249279861 |
| ENSDART00000141569 | tpt1              | 0.218299383  | 0.390841103  | 0.22789951   | -0.0744535   |
| ENSDART00000141578 | shmt1             | 2.367581981  | 4.511004025  | 4.354684857  | -7.25195E-16 |
| ENSDART00000141579 | fbxo10            | 0.546896982  | 0.414684656  | 0.492652565  | 0.452194062  |
| ENSDART00000141596 | gpat3             | 0.765600139  | 0.644414234  | 0.654748666  | 0.141764441  |
| ENSDART00000141597 | lrrfip1b          | -0.336053735 | 0.307524713  | 0.270509711  | 0.2738567    |
| ENSDART00000141606 | commd8            | 0.496320125  | 0.646713153  | 0.422272129  | 0.302789387  |
| ENSDART00000141625 | si:ch211-156p11.1 | 0.900660828  | 1.143855847  | 0.822477469  | 0.791150698  |
| ENSDART00000141626 | gtf2h5            | 0.582335915  | 0.792355335  | 0.589249078  | 0.547281799  |
| ENSDART00000141629 | nrxn2a            | 0.086318651  | -0.075949898 | 0.321968103  | 0.300507297  |
| ENSDART00000141634 | grid2             | -0.260805209 | -0.581973695 | -0.28493372  | -0.055775802 |
| ENSDART00000141657 | anxa4             | 0.870599992  | 0.703638401  | 0.563849009  | -0.254549515 |
| ENSDART00000141671 | socs2             | -0.321775893 | -0.091083829 | -1.001751456 | -1.186845404 |
| ENSDART00000141676 | rpl12             | 0.410901536  | 0.227715625  | 0.271640237  | 0.155083239  |
| ENSDART00000141691 | opn7d             | -0.282482677 | -0.654185182 | -0.202456799 | -0.407261262 |
| ENSDART00000141697 | mthfd1a           | 0.286969677  | 0.500882111  | 0.266896386  | -0.002369285 |
| ENSDART00000141714 | nupr1             | 1.321058122  | 1.103287011  | 0.703763985  | 0.083130869  |
| ENSDART00000141716 | inpp4b            | -0.094098482 | -0.269093973 | -0.37484544  | 0.075565559  |

|                    |                   |              |              |              |              |
|--------------------|-------------------|--------------|--------------|--------------|--------------|
| ENSDART00000141734 | hivep2a           | -0.218148846 | -0.337091836 | -0.481607769 | -0.327040294 |
| ENSDART00000141750 | tnnt3b            | -1.89549374  | 3.616832877  | 4.325157956  | 3.265344737  |
| ENSDART00000141752 | asphd1            | -0.390703626 | -0.359372328 | -0.291984856 | 0.011586147  |
| ENSDART00000141779 | fn dc5a           | -1.597130885 | -1.939288998 | -0.836516829 | 0.004414498  |
| ENSDART00000141791 | si:ch211-284e13.6 | -0.25009242  | -0.144926208 | 0.53594874   | 0.219211266  |
| ENSDART00000141831 | WDR31             | -0.216001124 | -0.160387595 | -0.391138756 | -0.241605138 |
| ENSDART00000141835 | tspan18b          | -0.306678314 | -0.201727051 | 0.109445214  | 0.302434848  |
| ENSDART00000141837 | esd               | 0.782720008  | 0.801148933  | 0.794217077  | 0.347191174  |
| ENSDART00000141841 | psmb7             | 2.547438262  | 1.548911002  | 3.335199455  | 2.703257309  |
| ENSDART00000141868 | si:dkey-184a18.5  | 0.011848086  | 0.007989242  | -0.315131621 | -0.067508448 |
| ENSDART00000141876 | ftr30             | 0.380222613  | 0.277973219  | 1.408194744  | 0.300573986  |
| ENSDART00000141877 | kcnk10a           | 1.57307368   | 1.979146889  | 1.661354893  | 0.924431526  |
| ENSDART00000141917 | ank1a             | -1.167872922 | -1.059135645 | -0.600851313 | -0.041118915 |
| ENSDART00000141920 | si:ch211-224l10.4 | -1.330425532 | -0.617989075 | -0.986788428 | -0.796603249 |
| ENSDART00000141941 | zfpm2a            | 3.791965294  | 3.402723828  | 3.788725401  | 3.249505128  |
| ENSDART00000141955 | mcf2b             | -0.173106859 | -0.26422462  | -0.398065805 | 0.016363494  |
| ENSDART00000141958 | cdh24a            | -0.328998631 | -0.596758779 | -0.216164592 | 0.127161048  |
| ENSDART00000141974 | acsl3b            | -0.154671373 | 0.25230778   | 0.484219802  | 0.119435773  |
| ENSDART00000141977 | herc3             | -0.166490009 | -0.257660784 | -0.135253579 | -0.013930049 |
| ENSDART00000141981 | loxhd1a           | 0.329259022  | 0.257582221  | 0.952686722  | 1.148017375  |
| ENSDART00000142010 | ncam1b            | -0.299560612 | -0.317330716 | -0.349579067 | -0.156694047 |
| ENSDART00000142013 | penka             | -0.474299096 | -0.531588241 | -0.656476493 | -0.472875583 |
| ENSDART00000142026 | si:dkey-167i21.2  | -0.765729811 | -0.21936881  | -0.933028715 | -0.2803887   |
| ENSDART00000142061 | si:dkey-32e23.4   | -0.369490073 | -0.293305321 | 0.04108125   | 0.132687244  |
| ENSDART00000142087 | foxp2             | -0.522019738 | -0.4194261   | 0.065656049  | 0.27497631   |
| ENSDART00000142088 | si:ch211-218c6.8  | 1.058750612  | 0.593589729  | 0.534639469  | 0.071525268  |
| ENSDART00000142104 | cep162            | 0.409390298  | 0.286359079  | 0.288581786  | 0.16808044   |
| ENSDART00000142112 | vma21             | -0.082665202 | -0.082534524 | -0.180302218 | -0.34518071  |
| ENSDART00000142122 | cplx2l            | -1.429903189 | -0.89072761  | 0.133226492  | 0.114783163  |
| ENSDART00000142129 | tacr2             | -0.694450519 | -0.993924228 | -0.826737427 | -0.21380073  |
| ENSDART00000142140 | ppfia2            | -0.37587085  | -0.48411577  | 0.218087957  | 0.20796301   |
| ENSDART00000142141 | grin2aa           | -0.499492643 | -0.789969038 | -0.312539264 | 0.08079802   |
| ENSDART00000142146 | dmtn              | 0.637268571  | 0.800533621  | 0.832554824  | 0.713529971  |
| ENSDART00000142155 | myh14             | 0.116679043  | 0.189831513  | 0.30854982   | 0.263648695  |
| ENSDART00000142157 | arl15a            | -0.037401347 | -0.185890543 | -0.49114445  | -0.348659966 |
| ENSDART00000142158 | hars              | 0.313357085  | 0.416680865  | 0.429639073  | 0.153346223  |
| ENSDART00000142164 | ccl38.1           | 0.183884553  | 0.311556871  | -0.574993202 | -1.074418737 |
| ENSDART00000142171 | syt6a             | -0.424476082 | -0.649670345 | -0.435293945 | -0.206511692 |
| ENSDART00000142196 | fam167ab          | -0.920556961 | -0.832834787 | -1.167437341 | -1.267796279 |
| ENSDART00000142223 | hivep3b           | -0.312228644 | -0.441058379 | -0.334712198 | -0.18438466  |
| ENSDART00000142239 | CR450716.1        | -0.604404157 | -0.186424277 | -0.082867047 | -0.199369979 |
| ENSDART00000142336 | hipk3b            | -0.202639972 | -0.175487886 | -0.276049793 | -0.081101671 |
| ENSDART00000142356 | smyd2a            | 2.425657932  | 2.779397529  | 2.178998127  | 1.672270997  |
| ENSDART00000142377 | MEGF9 (1 of many) | -0.489828408 | -0.163053003 | 0.463102805  | 0.22210349   |
| ENSDART00000142389 | cracr2ab          | 1.038814867  | 1.254276576  | 0.507748466  | -0.396339594 |
| ENSDART00000142397 | samd12            | -0.674160268 | -0.821942052 | -0.657095298 | -0.360701575 |
| ENSDART00000142413 | BX897741.1        | -0.396693848 | -0.590528792 | -0.411359985 | -0.422415067 |
| ENSDART00000142422 | tgm2l             | 1.901086414  | 0.665689502  | 0.275506536  | 0.14002471   |
| ENSDART00000142428 | josd2             | 0.235661569  | 0.659033561  | 0.722639048  | 0.359420457  |
| ENSDART00000142450 | zgc:153219        | 0.356379183  | 0.700229042  | 0.242962571  | 0.037010709  |
| ENSDART00000142454 | si:dkey-121a11.3  | -0.218109071 | -0.329830559 | -0.334040533 | -0.225452629 |

|                    |                   |              |              |              |              |
|--------------------|-------------------|--------------|--------------|--------------|--------------|
| ENSDART00000142462 | tshz3a            | -1.120926636 | -3.365499709 | -0.84112851  | -0.654584115 |
| ENSDART00000142467 | si:ch211-199g17.2 | 2.796012298  | 2.177853709  | 2.464842477  | 1.654064057  |
| ENSDART00000142489 | slco5a1b          | -0.38890353  | -0.329924623 | -0.120653024 | -0.00920305  |
| ENSDART00000142492 | eno1b             | -0.238975644 | -0.29896654  | -0.354383484 | -0.060042567 |
| ENSDART00000142524 | chrnb2a           | -0.869143617 | -0.99350722  | -0.040693199 | 0.426386933  |
| ENSDART00000142529 | si:dkey-286j15.1  | 0.703675816  | 0.544043539  | 0.896839213  | 0.54754086   |
| ENSDART00000142543 | si:dkey-206f10.1  | -0.205833854 | -0.070068511 | -0.826534181 | -0.287245824 |
| ENSDART00000142546 | cdc42l2           | 0.502232145  | 0.904679926  | 0.447404351  | 0.132174294  |
| ENSDART00000142560 | pdxkb             | 0.184442367  | 0.163391714  | 0.33929775   | 0.221566535  |
| ENSDART00000142569 | specc11b          | 0.378697075  | 0.547073638  | 0.617855803  | 0.275260653  |
| ENSDART00000142572 | sparc             | -0.204187388 | -0.23572234  | -0.326346891 | -0.277892827 |
| ENSDART00000142584 | alx1              | 1.361674144  | 1.279023188  | 1.723053191  | -0.115335088 |
| ENSDART00000142605 | sorbs2b           | -0.090898219 | -0.353328393 | -0.576838002 | -0.278787769 |
| ENSDART00000142634 | FP067425.1        | 1.971749592  | 2.170812908  | 1.958026148  | 1.009935297  |
| ENSDART00000142648 | gramd1a           | -0.23770878  | -0.291013375 | -0.237165881 | -0.156534014 |
| ENSDART00000142653 | grm1a             | -0.469462455 | -0.467735907 | -0.088400916 | 0.178280203  |
| ENSDART00000142654 | BX324123.2        | -0.377689742 | -0.458973085 | -0.444383379 | -0.275709525 |
| ENSDART00000142661 | osbpl2a           | -0.307460163 | -0.305018775 | -0.245046053 | -0.17275397  |
| ENSDART00000142665 | kctd15a           | -0.244770563 | -0.321970355 | -0.179500858 | -0.083583768 |
| ENSDART00000142678 | slc10a1           | -0.780280747 | -0.374232851 | -0.51558614  | -0.22594401  |
| ENSDART00000142687 | cnn2              | 0.635956839  | -0.518048624 | 0.612837411  | -3.662416494 |
| ENSDART00000142691 | trim35-10         | 1.464216907  | 1.327065997  | 0.977518865  | 0.007627538  |
| ENSDART00000142692 | eef1b2            | 0.349947783  | 0.50162657   | 0.39446346   | 0.093426844  |
| ENSDART00000142726 | creg2             | -0.073456763 | -0.046645374 | -0.204358474 | -0.271881041 |
| ENSDART00000142731 | rce1b             | -0.103631801 | -0.326325127 | -0.391135117 | -0.061782364 |
| ENSDART00000142735 | si:ch211-13f8.1   | -0.324319655 | -0.241821619 | -0.588481479 | -0.554389586 |
| ENSDART00000142748 | UNC13A            | -0.222825276 | -0.520698317 | -0.335972829 | 0.134560543  |
| ENSDART00000142772 | eif4a1a           | 0.755438851  | 0.594665203  | 0.351260825  | 0.661749697  |
| ENSDART00000142778 | BX569784.1        | -0.298918438 | -0.277434239 | -0.189295135 | -0.216741666 |
| ENSDART00000142806 | stxbp5a           | -0.250986358 | -0.382479123 | -0.333968332 | -0.143471828 |
| ENSDART00000142810 | gabrac3           | -0.405359169 | -0.863749916 | -0.692169745 | -0.647424845 |
| ENSDART00000142815 | fdps              | 0.434008031  | 0.982096797  | 0.955228312  | 0.608495312  |
| ENSDART00000142837 | enpp5             | -0.408425134 | -0.376571863 | -0.363824939 | -0.214479077 |
| ENSDART00000142851 | itih6             | -0.217828278 | -0.246312318 | -4.361209214 | -4.055941297 |
| ENSDART00000142873 | BX901918.1        | 0.845880305  | 0.530715844  | 1.008998061  | 0.591786557  |
| ENSDART00000142880 | BX294379.1        | 0.237830465  | 0.561801634  | 0.415821035  | 0.460224197  |
| ENSDART00000142884 | gnpt2a            | -0.004065507 | -0.183032589 | -0.673226204 | -0.483998962 |
| ENSDART00000142919 | ssh1b             | 0.196097873  | 0.173857746  | 0.465900153  | 0.503515831  |
| ENSDART00000142920 | zgc:162150        | 1.709110448  | 2.426589338  | 1.780018708  | 1.501264432  |
| ENSDART00000142922 | slc17a5           | 0.2420628    | 0.323011659  | 0.210848621  | 0.174231112  |
| ENSDART00000142975 | si:ch1073-70f20.1 | -0.443514404 | -0.337920446 | -0.430300513 | -0.297428401 |
| ENSDART00000142976 | kcnip3a           | -0.515340349 | -0.554488278 | -0.50826115  | -0.165828333 |
| ENSDART00000143000 | rnf220b           | -0.004804151 | -0.254916502 | -0.367501204 | -0.153255414 |
| ENSDART00000143048 | lmo7b             | -0.147694355 | -0.241574624 | -0.520231272 | -0.160787429 |
| ENSDART00000143056 | zyx               | 0.416244119  | 0.475600395  | 0.593066786  | 0.15882784   |
| ENSDART00000143066 | ube2e1            | 0.330371306  | 0.357877825  | 0.149635317  | 0.181174607  |
| ENSDART00000143083 | CT573139.1        | -0.081020454 | -0.307026797 | -0.341094511 | -0.086434359 |
| ENSDART00000143120 | si:dkey-147f3.4   | 1.419591527  | 3.82528139   | 2.470866243  | 3.546981594  |
| ENSDART00000143152 | cpne5a            | -0.664046359 | -0.825602355 | -0.316663455 | 0.050239809  |
| ENSDART00000143165 | tsc22d1           | -0.098364585 | -0.21923408  | -0.39849137  | 0.017570634  |
| ENSDART00000143199 | wasf3a            | -0.216537889 | -0.280788628 | -0.398676762 | -0.269991874 |

|                    |                   |              |              |              |              |
|--------------------|-------------------|--------------|--------------|--------------|--------------|
| ENSDART00000143200 | kcnma1a           | -0.226894558 | -0.334282966 | -0.480968248 | -0.397036214 |
| ENSDART00000143203 | parp2             | 0.638789429  | 0.581199479  | 0.559257592  | 0.245299499  |
| ENSDART00000143208 | etnk1             | 0.29866149   | 0.19770258   | 0.103751026  | 0.382131244  |
| ENSDART00000143245 | nptnb             | -0.0813348   | -0.106325128 | -0.477835951 | -0.112902967 |
| ENSDART00000143286 | lnx1              | -0.74422542  | -0.772813048 | -0.069056217 | 0.13158415   |
| ENSDART00000143291 | RPL41             | 0.451636798  | 0.464258672  | 0.193261311  | 0.034762109  |
| ENSDART00000143376 | rab3b             | -0.460716785 | -0.436622412 | 0.05069835   | 0.173014647  |
| ENSDART00000143382 | il1rapl2          | -0.355933029 | -0.71045348  | -0.38678508  | -0.068375826 |
| ENSDART00000143410 | EMB               | -1.826210099 | -1.592080235 | -0.486327336 | 0.178400158  |
| ENSDART00000143413 | si:ch211-170d8.2  | 2.110280665  | 1.653225126  | 1.38414074   | 0.820720018  |
| ENSDART00000143434 | ubash3ba          | -0.070569577 | 0.008399701  | 0.263717646  | 0.11493286   |
| ENSDART00000143457 | cndp2             | 0.393197537  | 0.458029638  | 0.473219597  | 0.244423454  |
| ENSDART00000143503 | usp21             | -0.183997919 | -0.332937745 | -0.642449016 | -0.356635014 |
| ENSDART00000143519 | impdh1a           | -0.362024165 | -0.511295198 | -0.258726495 | -0.069176235 |
| ENSDART00000143554 | ampd2b            | -0.328956412 | -0.382404642 | -0.421715131 | -0.209511328 |
| ENSDART00000143562 | gbp2              | 0.680404258  | 0.927169543  | 1.353668195  | 0.527828388  |
| ENSDART00000143573 | ncor1             | 0.450093687  | 0.292142618  | 0.666194454  | 0.343803309  |
| ENSDART00000143582 | si:ch211-236p22.1 | -0.593497691 | -1.183006832 | -0.39659144  | -0.180756629 |
| ENSDART00000143587 | ern2              | 0.504450294  | 0.214096186  | 0.104332211  | 0.050090305  |
| ENSDART00000143618 | birc7             | 0.867487648  | 0.469428911  | 0.548081783  | 0.007263478  |
| ENSDART00000143625 | map7d2b           | 0.025364857  | -1.606530561 | -4.429840485 | -0.88152256  |
| ENSDART00000143662 | ankrd33aa         | -0.118189532 | -0.449119978 | -0.599045615 | 0.004982045  |
| ENSDART00000143697 | si:dkeyp-69e1.8   | 0.277815064  | 0.526114648  | 0.670410394  | 0.498924627  |
| ENSDART00000143703 | flrt3             | -0.315208699 | -0.338016477 | -0.216002726 | -0.160149445 |
| ENSDART00000143723 | idi1              | 0.080932725  | 0.304370095  | 0.372374682  | 0.127047939  |
| ENSDART00000143741 | fkbp5             | 1.764298053  | 1.865156046  | 1.631976013  | 1.871443577  |
| ENSDART00000143743 | si:ch211-14a17.10 | 0.56355315   | 0.97468243   | 0.596767311  | 0.343957389  |
| ENSDART00000143761 | cadm4             | -0.396807548 | -0.426573725 | -0.041424036 | -0.105152637 |
| ENSDART00000143766 | tbc1d4            | 0.551251852  | 0.35059591   | 0.424872318  | 0.224396247  |
| ENSDART00000143784 | doc2d             | -0.282456786 | -0.449882775 | -0.341326778 | 0.036564808  |
| ENSDART00000143787 | tnr               | -0.299938525 | -0.646994379 | -0.19048806  | -0.113023917 |
| ENSDART00000143793 | C3 (1 of many)    | 3.237329668  | 4.023510735  | 3.503827488  | 2.024562274  |
| ENSDART00000143819 | VASH1             | 0.033504925  | 0.324442057  | 0.595830734  | 0.534870749  |
| ENSDART00000143829 | nxn1              | -0.184554354 | -0.325799787 | -0.486032926 | -0.185522737 |
| ENSDART00000143840 | gstk1             | 0.057517576  | -0.140839441 | -0.201267582 | -0.834065155 |
| ENSDART00000143846 | si:ch211-198c19.3 | 0.524345776  | 0.185185856  | -0.297806816 | -0.062260629 |
| ENSDART00000143860 | si:ch211-154e10.1 | -0.109941804 | -0.36125539  | -0.451271764 | -0.06288628  |
| ENSDART00000143867 | syngap1b          | -0.339959547 | -0.514759454 | -0.488418852 | -0.182310837 |
| ENSDART00000143874 | akna              | -0.124615674 | -0.323808831 | -0.482322372 | -0.23639171  |
| ENSDART00000143875 | BX323074.2        | 0.32505808   | -0.029313176 | -0.099305279 | -0.178101813 |
| ENSDART00000143878 | arhgef9a          | -0.465269949 | -0.707003765 | -0.492066921 | -0.306386806 |
| ENSDART00000143887 | taar12g           | 2.133495532  | 1.949189055  | 1.339108526  | 1.854618081  |
| ENSDART00000143909 | tbc1d9            | -0.237612035 | -0.281483225 | -0.04707848  | 0.049665559  |
| ENSDART00000143911 | si:dkey-105e17.1  | -0.529795865 | -0.492017338 | -0.300236892 | -0.145540976 |
| ENSDART00000143919 | gabbr1b           | -0.121288245 | -0.415278076 | -0.279488234 | -0.175446101 |
| ENSDART00000143928 | rwdd1             | 0.331616231  | 0.265135658  | 0.236169655  | 0.064492205  |
| ENSDART00000143938 | sema3ga           | 0.034230149  | -0.448431565 | 0.102011548  | 0.447499442  |
| ENSDART00000143963 | pcloa             | -0.078913048 | -0.544095469 | -0.414092766 | -0.012445983 |
| ENSDART00000143969 | BX247868.1        | -1.179119979 | -1.430780681 | -0.233116942 | 0.342359274  |
| ENSDART00000143999 | tnnt3b            | 0.546685869  | 4.375596584  | 5.084902064  | 3.992962258  |
| ENSDART00000144046 | rapgef4           | -0.382423404 | -0.346599548 | -0.357063132 | -0.146328348 |



|                    |                  |              |              |              |              |
|--------------------|------------------|--------------|--------------|--------------|--------------|
| ENSDART00000144048 | cecr1b           | 1.174703015  | 1.015529557  | 0.446419815  | -0.23634795  |
| ENSDART00000144050 |                  | -0.572877113 | -0.701246998 | -0.196460214 | -0.040487474 |
| ENSDART00000144053 | si:dkey-21e2.10  | 0.342164757  | 1.862494203  | 1.068542572  | -0.153388265 |
| ENSDART00000144067 | cabp5a           | -0.477283062 | -0.255392436 | -0.467866686 | -0.403996112 |
| ENSDART00000144068 | zgc:101851       | 0.417625916  | 0.309307199  | 0.017931645  | -0.07898028  |
| ENSDART00000144139 | elavl4           | 1.756586356  | 1.578077782  | 0.938796608  | 0.66956976   |
| ENSDART00000144175 | ccdc136b         | -0.408583735 | -0.440451575 | -0.345784282 | -0.125541648 |
| ENSDART00000144186 | pou6f2           | -0.474463335 | -0.465571046 | 0.092941552  | 0.436081081  |
| ENSDART00000144215 | pcnxl2           | -0.697249288 | -0.448197444 | 0.040412938  | 0.382373048  |
| ENSDART00000144216 | gal3st1b         | -0.491885196 | -0.717325904 | -0.58217274  | -0.190076988 |
| ENSDART00000144237 | gig2p            | 0.374493634  | 0.174814468  | 1.411754829  | -0.127638364 |
| ENSDART00000144238 | cry1bb           | -2.336873942 | 0.347073563  | -0.04859154  | -0.311120285 |
| ENSDART00000144246 | tbxas1           | -0.011108915 | 0.001179893  | -0.320953776 | -0.371393575 |
| ENSDART00000144255 | magixb           | -0.339150091 | -0.441125122 | -0.366876369 | -0.172380242 |
| ENSDART00000144261 | fryl             | -0.221060382 | -0.265751165 | -0.423351874 | -0.131445521 |
| ENSDART00000144285 | si:ch211-196g2.4 | -0.287314781 | -0.275198401 | -0.33300774  | -0.198378078 |
| ENSDART00000144297 | ubac2            | -0.266999312 | -0.798888734 | -0.707434326 | -0.564642121 |
| ENSDART00000144303 | AK6              | 0.166979081  | -0.045967241 | -0.30997345  | -0.290616599 |
| ENSDART00000144308 | si:dkey-11o15.5  | 1.026391135  | 2.84679961   | 3.809819934  | 2.718686222  |
| ENSDART00000144335 | cyp27c1          | 1.539730469  | 0.927858614  | 0.30747539   | -0.356140532 |
| ENSDART00000144342 | ppp1r14ba        | 0.017178827  | 0.781919568  | 1.244415225  | 1.189050173  |
| ENSDART00000144346 | cdkn1bb          | 0.579581082  | 0.718938042  | 0.058805886  | -0.088669944 |
| ENSDART00000144351 | malt1            | -0.740504685 | -0.746576787 | -0.600575844 | -0.384172626 |
| ENSDART00000144353 | calcrla          | -0.265245102 | -0.29868229  | -0.249979568 | -0.195320595 |
| ENSDART00000144361 | ank1b            | -0.731673078 | -0.825040806 | 0.086374477  | 0.310723345  |
| ENSDART00000144448 | pcbp3            | -0.386917442 | -0.448839957 | -0.257435258 | -0.084182982 |
| ENSDART00000144469 | adora2b          | -0.015759069 | -0.127966141 | -0.39792302  | -0.033165164 |
| ENSDART00000144500 | si:ch211-235f1.3 | 2.218077738  | 0.39200338   | 2.195588647  | 1.510701941  |
| ENSDART00000144503 | ran              | -0.075551405 | 0.448221073  | 0.249018928  | 0.118064827  |
| ENSDART00000144516 | lonrf1l          | 0.003516441  | 0.629397595  | -0.101368349 | 0.117101343  |
| ENSDART00000144544 | col1a2           | 0.443294043  | 1.698639717  | 2.716305218  | 1.282115721  |
| ENSDART00000144545 | rc3h1a           | 0.1127689    | 0.086123881  | 0.323320533  | 0.192355814  |
| ENSDART00000144555 | si:dkey-84o3.3   | 0.84569976   | 1.063530072  | 1.082186309  | 0.816110648  |
| ENSDART00000144592 | sik2a            | -0.05071398  | -0.135507163 | -0.424760133 | 0.101311014  |
| ENSDART00000144600 | bin1a            | -0.647409952 | -0.602565457 | -0.5226216   | -0.498459302 |
| ENSDART00000144608 | plcl1            | -0.399605613 | -0.241387332 | -0.124693789 | 0.02448912   |
| ENSDART00000144647 | bcat1            | -0.053055163 | -0.144301718 | -0.580079153 | -0.061442763 |
| ENSDART00000144681 | anxa13l          | 0.688342481  | 1.628944564  | 2.065542903  | 1.40538163   |
| ENSDART00000144702 | clint1a          | 0.287820278  | 0.14751069   | 0.132691317  | -0.0310018   |
| ENSDART00000144711 | tmem154          | 0.48356725   | 0.317274745  | 0.352966647  | 0.032904309  |
| ENSDART00000144714 | HTRA2            | 0.502271196  | 0.745024882  | 0.567017564  | 0.566812931  |
| ENSDART00000144737 | srsf3b           | 0.361810279  | 0.317106803  | 0.304841622  | 0.541582711  |
| ENSDART00000144750 | tnni2b.1         | 0.190106792  | 2.993607369  | 3.517771751  | 2.049682842  |
| ENSDART00000144766 | nars             | 0.166803353  | 0.38562143   | 0.598983821  | 0.308867409  |
| ENSDART00000144767 | gabra1           | -0.494710008 | -0.525246082 | -0.558533509 | -0.303902197 |
| ENSDART00000144770 | cast             | 1.895732545  | 2.316221594  | 1.433447785  | 1.629878019  |
| ENSDART00000144802 | dfnb31b          | -0.206535765 | -0.346317212 | -0.484783097 | -0.018383317 |
| ENSDART00000144804 | mxra7            | -0.254910086 | -0.321688262 | -0.500299705 | -0.323281006 |
| ENSDART00000144813 | march8           | -0.52367029  | -0.417394306 | -0.174509938 | -0.172830735 |
| ENSDART00000144814 | si:dkey-31f5.8   | 0.429768416  | 1.027387879  | 0.82502917   | 0.369456203  |
| ENSDART00000144817 | cfl1             | 0.341949415  | 0.252829572  | 0.49073898   | 0.258667203  |

|                    |                   |              |              |              |              |
|--------------------|-------------------|--------------|--------------|--------------|--------------|
| ENSDART00000144841 | si:dkey-242g16.2  | 0.827348141  | 1.743182823  | 1.970186443  | 1.411913803  |
| ENSDART00000144842 | dctn2             | -0.498329292 | -3.353631529 | 0.161761115  | 0.105336326  |
| ENSDART00000144862 | ptpmt1            | 3.64529742   | 2.311630713  | 2.226765633  | 3.455463537  |
| ENSDART00000144886 | dicp1.1           | 1.748045166  | 0.589930553  | 0.172712572  | 0.178536852  |
| ENSDART00000144890 | bokb              | -0.312629523 | -0.278040732 | -0.730243904 | -0.348692502 |
| ENSDART00000144891 | gpnmb             | 2.526942309  | 2.443053131  | 2.053909603  | -0.779431544 |
| ENSDART00000144894 | bcl11ba           | -0.656989822 | -0.679320488 | 0.181338486  | 0.623847694  |
| ENSDART00000144925 | snx27a            | -0.201299797 | -0.367903189 | -0.251100705 | -0.13350684  |
| ENSDART00000144946 | adcyap1b          | 2.385755846  | 2.421463563  | 2.507590258  | 1.873754889  |
| ENSDART00000144966 | nt5c2l1           | 0.621464058  | 1.214449784  | 1.836289861  | 0.635815132  |
| ENSDART00000144970 | meis2b            | -0.299148131 | 0.020280124  | 0.107132127  | 0.297996513  |
| ENSDART00000144986 | otud5a            | 0.068487051  | 0.299156316  | 0.307343363  | 0.221359831  |
| ENSDART00000144993 | tbc1d14           | 0.120746825  | 0.349052884  | 0.289914122  | 0.097064778  |
| ENSDART00000144995 | MFSD3             | -0.419691404 | -0.388696945 | -0.281399212 | -0.247251894 |
| ENSDART00000145018 | gprc5bb           | -0.280944825 | -0.565589689 | -0.320436299 | -0.038626462 |
| ENSDART00000145019 | akr1a1b           | 0.370317087  | 0.266617428  | 0.13791003   | -0.009346531 |
| ENSDART00000145022 | CU459186.8        | 2.820516441  | 4.510118733  | 2.721368195  | 2.385722915  |
| ENSDART00000145035 | saga              | -0.094875139 | -0.251791894 | -0.561974573 | -0.363496236 |
| ENSDART00000145055 | pnr2              | -0.148748622 | -0.240065036 | -0.476375745 | -0.443408468 |
| ENSDART00000145065 |                   | 4.897906418  | 2.757476262  | 4.60015098   | 5.019792283  |
| ENSDART00000145095 | celsr3            | 0.648145926  | 0.648607509  | 0.829081729  | 0.619308918  |
| ENSDART00000145096 | fam219ab          | -0.366547695 | -0.337752539 | -0.191344563 | -0.015845187 |
| ENSDART00000145103 | cntfr             | 0.307964555  | 0.391102809  | 0.626651223  | 0.264745691  |
| ENSDART00000145107 | agfg1b            | -0.053414539 | 0.037458177  | 0.272453618  | 0.201504327  |
| ENSDART00000145108 | MFF (1 of many)   | -0.387524941 | -0.341112286 | -0.251149344 | -0.013627184 |
| ENSDART00000145111 | parp4             | 1.113854381  | 0.990369473  | 0.690636927  | 0.186507426  |
| ENSDART00000145114 | ptprsa            | -0.133739633 | -0.353332073 | -0.057919239 | 0.041724305  |
| ENSDART00000145124 | dact3a            | 0.112856383  | 0.770301052  | 1.625107526  | 0.355230326  |
| ENSDART00000145170 | smox              | 0.719497557  | 0.099508547  | -0.032495938 | 0.130866421  |
| ENSDART00000145184 | srrd              | -3.467209407 | 0.181528862  | -0.326150144 | -0.189288253 |
| ENSDART00000145198 | steap4            | 0.551058744  | 0.178525002  | -0.419104103 | -0.970957834 |
| ENSDART00000145210 | ankle2            | 0.203906028  | 0.433259544  | 0.357710257  | 0.326696668  |
| ENSDART00000145215 | grin2ca           | -0.197290629 | -0.356995819 | -0.467710351 | -0.053225483 |
| ENSDART00000145220 | arvcfa            | -0.706915106 | -0.825791875 | -0.448746575 | -0.046016635 |
| ENSDART00000145226 | si:ch211-233h19.2 | -0.372287835 | -0.175787817 | -0.260726103 | -0.131614613 |
| ENSDART00000145230 | eef1db            | 0.569560585  | 0.627404265  | 1.018116547  | 0.789247315  |
| ENSDART00000145258 | glb               | -0.010345949 | -0.147193332 | -0.750348982 | -0.227873062 |
| ENSDART00000145269 | ostm1             | 0.549197851  | 0.4592474    | 0.036533403  | -0.163457465 |
| ENSDART00000145275 | si:dkey-147f3.8   | 1.443349889  | 1.631277345  | 1.233548809  | -0.107779207 |
| ENSDART00000145282 | sepp1a            | -0.462981641 | -0.396376841 | -0.662591735 | -0.92136404  |
| ENSDART00000145294 | FEZ2 (1 of many)  | 0.025283475  | -0.037737708 | -0.286085795 | -0.169439894 |
| ENSDART00000145309 | exoc3             | 2.170059758  | 1.622886137  | 1.185093243  | 1.97278521   |
| ENSDART00000145330 | apoc1             | 1.228570608  | 0.722853476  | 0.218571174  | 0.363892889  |
| ENSDART00000145331 | zgc:92066         | 3.539715592  | 2.15686966   | 1.135379743  | 1.013519624  |
| ENSDART00000145342 | cbln1             | -0.285689309 | -0.291683977 | -0.350650667 | -0.126158592 |
| ENSDART00000145349 | bcat1             | -0.398195711 | -0.070627262 | -0.574724119 | -0.164567732 |
| ENSDART00000145364 | sybu              | -0.525383816 | -0.345930455 | -0.451355227 | -0.158271762 |
| ENSDART00000145377 | rpl38             | 0.331388676  | 0.460944412  | 0.086514771  | -0.0487643   |
| ENSDART00000145379 | fblim1            | 0.305913455  | 0.545649791  | 0.383397127  | 0.135782412  |
| ENSDART00000145387 | shank2            | -0.271198688 | -0.514736215 | -0.289482704 | -0.011228429 |
| ENSDART00000145413 | si:ch211-253p2.2  | -0.612329709 | -0.583952587 | -0.545467055 | -0.273784221 |

|                    |                    |              |              |              |              |
|--------------------|--------------------|--------------|--------------|--------------|--------------|
| ENSDART00000145428 | si:ch211-51e12.7   | -0.292178538 | -0.197575677 | -0.034168177 | 0.070057863  |
| ENSDART00000145434 | gpr52              | -0.413465096 | -0.575440094 | -0.276023467 | -0.017738845 |
| ENSDART00000145436 | atp2a2a            | -0.880456774 | -0.552067998 | -0.067905189 | -0.332284195 |
| ENSDART00000145449 | rpl10              | 0.64701527   | 0.814914535  | 0.479616309  | 0.351438297  |
| ENSDART00000145486 | si:ch211-243a20.3  | 1.596806687  | 1.581489321  | 1.736665736  | -0.106318155 |
| ENSDART00000145489 | ano11              | -1.065264341 | -1.355279668 | -0.34443399  | 0.075205433  |
| ENSDART00000145494 | kcnq3              | -0.150620266 | 0.575528836  | 1.458464727  | 1.126016522  |
| ENSDART00000145545 | dclk1a             | -0.21717792  | -0.314020567 | -0.407893866 | -0.042242501 |
| ENSDART00000145558 | si:ch211-237l4.6   | -0.183280044 | -0.231325216 | -0.614649778 | -0.510830341 |
| ENSDART00000145562 | robo4              | 1.739515239  | 1.001047952  | 0.857159879  | -0.094789579 |
| ENSDART00000145605 | camk2d1            | 0.045519482  | 0.325117172  | 0.151136219  | 0.629830606  |
| ENSDART00000145615 | cacna1i            | -0.38207214  | -0.804209146 | -0.404812647 | -0.085276411 |
| ENSDART00000145616 | adarb1b            | -0.549552658 | -0.593167659 | -0.056719481 | 0.082749855  |
| ENSDART00000145668 | si:ch211-236p5.2   | -0.579324415 | -0.253977811 | -0.665119908 | -0.600847942 |
| ENSDART00000145673 | si:ch211-126i22.5  | 0.167835794  | 0.336202454  | 0.573573931  | 0.33326684   |
| ENSDART00000145681 | atp6v1h            | 0.62737841   | 0.200274483  | 0.109012982  | -0.483227692 |
| ENSDART00000145691 | PTP4A3 (1 of many) | 0.061273139  | -0.037655485 | -0.389148491 | -0.598282045 |
| ENSDART00000145705 | ablim1a            | -0.310864127 | 0.043751002  | 0.292255753  | 0.332622511  |
| ENSDART00000145728 | sdhc               | -0.035025769 | -0.113602993 | -0.325388824 | -0.192371035 |
| ENSDART00000145743 | si:dkey-222h21.3   | 2.082143417  | 2.044714298  | 1.752169227  | 1.309410865  |
| ENSDART00000145762 | dnaaf1             | -0.407466904 | -0.372899622 | -0.590562671 | -0.565268948 |
| ENSDART00000145775 | mpp4a              | -0.462462268 | -0.206618846 | -0.102159961 | 0.056169031  |
| ENSDART00000145777 | adgrb3             | -0.131394962 | -0.455026919 | -0.13584478  | 0.067074927  |
| ENSDART00000145778 | eif4g1a            | 0.287822409  | 0.058653961  | 0.329719916  | 0.260115281  |
| ENSDART00000145782 | ccl34a.3           | 1.066630706  | 1.262530626  | 1.391273396  | 1.026476376  |
| ENSDART00000145789 | fbxo41             | -0.304859    | -0.365689262 | -0.001299255 | 0.043794304  |
| ENSDART00000145809 | prkag3a            | -4.153185554 | -1.353616268 | -0.923701192 | -0.043754788 |
| ENSDART00000145834 | si:ch211-233a24.2  | -0.054480296 | -0.065552868 | -0.373189    | -0.049333125 |
| ENSDART00000145835 | tmx3               | -0.913440216 | 0.029499449  | 0.308787653  | 0.34181057   |
| ENSDART00000145852 | arpc5b             | 3.848588728  | 2.885756027  | 4.201851599  | 3.883565062  |
| ENSDART00000145859 | slc25a23b          | -0.271106084 | -0.480607261 | -0.132697812 | 0.164389769  |
| ENSDART00000145862 | gramd1ba           | -0.165891466 | -0.265579133 | -0.22242289  | -0.116668883 |
| ENSDART00000145875 | ANKRD34C           | -0.466770544 | -0.643453831 | -0.660279878 | 0.01171991   |
| ENSDART00000145886 | osbp13b            | 0.13475307   | 0.290875362  | 0.450588606  | 0.199350453  |
| ENSDART00000145894 | zgc:195245         | -0.325743953 | -0.471221888 | -0.661613866 | -0.246097731 |
| ENSDART00000145907 | gc3                | -0.385628346 | -0.300281403 | -0.1220973   | 0.029888955  |
| ENSDART00000145916 | lingo4a            | -0.858684072 | -0.829176543 | -0.734684966 | -0.796722528 |
| ENSDART00000145929 | slc24a2            | -0.262244646 | -0.388750168 | -0.249062022 | 0.013032324  |
| ENSDART00000145933 | si:rp71-68n21.9    | 0.834432396  | 0.464946482  | 0.375058394  | -0.112544064 |
| ENSDART00000145956 | ptpn23a            | 0.252886396  | 0.192353563  | 0.35477406   | 0.187678789  |
| ENSDART00000145959 | sik2a              | -0.340525942 | -0.474784074 | -0.456194757 | 0.011390214  |
| ENSDART00000145970 | si:dkey-83k24.5    | 0.413467032  | 0.037399564  | -0.039197609 | -0.146263052 |
| ENSDART00000145979 | col19a1            | -0.158274269 | -0.337487778 | -0.291137211 | -0.179712512 |
| ENSDART00000145981 | mmachc             | -0.180799553 | -0.336507302 | -0.603391198 | -0.368222803 |
| ENSDART00000145983 | cdkn1a             | 1.243824395  | 0.764194636  | 0.498342294  | 0.064303597  |
| ENSDART00000145997 | uap1               | 1.529889024  | 1.202439925  | 1.069222792  | 0.723659511  |
| ENSDART00000145999 | prx                | 1.586883428  | 3.204392125  | 2.633047079  | 1.399238803  |
| ENSDART00000146005 | gtpbp1             | 0.461505187  | 0.53679144   | 0.551879705  | 0.330029037  |
| ENSDART00000146007 | usf2               | -0.027075797 | -0.165338495 | -0.358464486 | -0.103064043 |
| ENSDART00000146008 | camkvl             | -0.251523364 | -0.299024254 | -0.462517021 | -0.14005057  |
| ENSDART00000146055 | ptchd4             | -0.534340079 | -0.556417786 | 0.177414073  | 0.199962898  |

|                    |                   |              |              |              |              |
|--------------------|-------------------|--------------|--------------|--------------|--------------|
| ENSDART00000146070 | arvcfb            | -0.070894502 | -0.208057535 | -0.298756488 | -0.110396791 |
| ENSDART00000146101 | mcoln1a           | 0.490011182  | 0.372261102  | 0.240356077  | 0.080050098  |
| ENSDART00000146106 | nfil3-5           | 0.032256315  | 1.067374086  | 1.300867348  | 1.052274713  |
| ENSDART00000146107 | ywhae1            | -0.007595908 | 0.375656099  | 0.665999115  | 0.632685234  |
| ENSDART00000146113 | arhgef9b          | -0.6095368   | -0.587211831 | -0.441711189 | -0.048741645 |
| ENSDART00000146114 | si:ch211-139g16.8 | 1.21401658   | 0.728240858  | 0.247635929  | -0.180282803 |
| ENSDART00000146120 | luzp2             | -0.491780393 | -0.439244253 | 0.071649151  | 0.105029542  |
| ENSDART00000146132 | si:ch211-254n4.3  | -0.407187074 | -0.522964952 | -0.215771966 | 0.042955183  |
| ENSDART00000146180 | csrn2             | 0.237147162  | 0.374829692  | 0.697707124  | 0.402573932  |
| ENSDART00000146210 | si:ch211-214p13.9 | 1.80985471   | 2.473449699  | 1.675655513  | -0.45037085  |
| ENSDART00000146222 | BX548073.2        | 0.396874686  | 0.19924291   | 0.197044037  | 0.232842702  |
| ENSDART00000146227 | slc24a3           | -0.627503774 | -0.581196675 | -0.447342274 | -0.279205796 |
| ENSDART00000146247 | zc2hc1a           | 0.181680565  | 0.536623189  | 0.750568991  | 0.668481158  |
| ENSDART00000146284 | kcnh3             | -0.880077839 | -1.089282019 | -0.771605014 | -0.433474862 |
| ENSDART00000146315 | stx5al            | -0.219102203 | -0.145337646 | -0.303930137 | -0.044513676 |
| ENSDART00000146321 | fibcd1            | -0.340172452 | -0.594838596 | -0.369380512 | -0.071609744 |
| ENSDART00000146327 | sgk1              | -0.407553517 | -0.497547741 | -0.442772363 | -0.391494952 |
| ENSDART00000146348 | shisa7a           | -0.257432452 | -0.343813852 | -0.064533631 | 0.047373088  |
| ENSDART00000146371 | olfm1b            | -0.300182439 | -0.072903502 | 0.253479105  | 0.553473031  |
| ENSDART00000146373 | nasp              | 3.16018099   | 3.265920313  | 2.837245417  | 1.580807285  |
| ENSDART00000146380 | map6d1            | -0.622612519 | -0.482084178 | -0.312516702 | -0.212427733 |
| ENSDART00000146394 | macf1a            | 0.292220827  | 0.266325023  | 0.282692477  | 0.251543817  |
| ENSDART00000146400 | st8sia5           | 0.352731191  | 0.917371468  | 1.067350167  | 0.852063315  |
| ENSDART00000146411 | sst6              | 0.736642137  | 1.700467827  | 1.549366173  | 1.261691667  |
| ENSDART00000146422 | samd12            | -0.651610173 | -1.082672704 | -0.694390946 | -0.535477884 |
| ENSDART00000146424 | bin1a             | -0.478145779 | -0.444599263 | -0.2729609   | -0.137965745 |
| ENSDART00000146434 | zgc:153115        | 0.499570303  | 0.817313835  | 0.902072926  | 0.441195032  |
| ENSDART00000146455 | si:dkey-245p14.7  | 1.534786293  | 2.054169347  | 1.459641722  | 1.163785428  |
| ENSDART00000146463 | samd11            | -0.429238253 | 0.041148803  | 0.036400645  | 0.142792336  |
| ENSDART00000146472 | kcng4a            | -0.174962319 | -0.077658154 | -0.410630934 | -0.442662471 |
| ENSDART00000146508 | ldlr4d4b          | -0.645866164 | -0.626215777 | -0.091198282 | -0.040482632 |
| ENSDART00000146517 | dpysl2b           | 0.345677828  | 1.022911519  | 1.287775094  | 0.946528154  |
| ENSDART00000146525 | chtopb            | 3.459860751  | 4.15390826   | 1.273403713  | 1.821621278  |
| ENSDART00000146530 | epha6             | -0.320688922 | -0.528894361 | -0.185025461 | 0.089827402  |
| ENSDART00000146553 | pfkpb             | -0.397983333 | -0.578737682 | -0.358519605 | -0.195354249 |
| ENSDART00000146563 | magixa            | 0.075133988  | 0.355594726  | 0.57567448   | 0.363486006  |
| ENSDART00000146564 | si:ch211-198c19.3 | 1.407263699  | 0.462763747  | -0.033079511 | -0.600140762 |
| ENSDART00000146567 | cenpk             | 2.135920979  | 1.866039444  | 1.584297235  | 1.144121982  |
| ENSDART00000146611 | cxcr3.3           | 0.415816929  | 0.611232638  | 0.663522207  | -0.008061564 |
| ENSDART00000146632 | rassf2a           | 0.029735353  | -0.579515238 | -0.449210112 | -0.253532753 |
| ENSDART00000146641 | adgrb2            | -0.339356043 | -0.358957699 | -0.00479776  | 0.052341655  |
| ENSDART00000146648 | cd99              | 0.568325087  | 1.118199036  | 0.745908705  | -0.085222667 |
| ENSDART00000146671 | lgals3a           | 0.211860458  | 0.266423347  | 0.163466771  | 0.057807983  |
| ENSDART00000146704 | pax6b             | -0.61310857  | -0.673866221 | -0.260691596 | -0.192950711 |
| ENSDART00000146708 | adar              | -0.042581428 | -0.004444765 | 0.40535861   | 0.024953366  |
| ENSDART00000146712 | ccdc85a           | -0.396306457 | -0.805958759 | -0.536293039 | -0.356615708 |
| ENSDART00000146715 | st6galnac3        | -0.320119064 | -0.207968819 | 0.143950361  | 0.08219826   |
| ENSDART00000146742 | ewsr1b            | 0.415208463  | 0.221707988  | 0.300205339  | 0.348462361  |
| ENSDART00000146744 | nfkbiab           | 0.787570548  | 0.783257317  | 0.468593447  | 0.633863732  |
| ENSDART00000146767 | fosl1a            | 0.841007094  | 1.285901651  | 0.733422298  | 0.173089455  |
| ENSDART00000146775 | kank3             | 2.938783957  | 2.713493484  | 2.4846528    | 0.885288567  |

|                    |                   |              |              |              |              |
|--------------------|-------------------|--------------|--------------|--------------|--------------|
| ENSDART00000146776 | tspan2b           | 0.412627689  | 1.44398444   | 1.603529521  | 0.88938646   |
| ENSDART00000146785 | tmem163b          | -0.68540579  | -0.770110571 | -0.115396875 | 0.356833449  |
| ENSDART00000146808 | si:ch73-184c24.1  | 1.14465672   | 1.950542793  | 2.864785673  | 1.868117236  |
| ENSDART00000146872 | emid1             | 0.014325328  | 0.393704295  | 0.644359098  | 0.692252594  |
| ENSDART00000146873 | tmem183a          | 2.267285842  | 2.498042527  | 2.600977396  | 2.807645399  |
| ENSDART00000146892 | abcg2d            | 0.141142908  | -0.029073312 | -0.499348256 | -1.743973024 |
| ENSDART00000146914 | mpp6a             | -0.247758591 | -0.21742389  | -0.181144549 | -0.11922972  |
| ENSDART00000146930 | pdk3a             | -0.237508559 | -0.287205966 | -0.210198002 | -0.212117205 |
| ENSDART00000146956 | fibpb             | 0.004335049  | -0.126807206 | -0.29094593  | -0.318585256 |
| ENSDART00000146962 | STX3 (1 of many)  | -0.081644241 | -0.246049482 | -0.328837917 | -0.149895857 |
| ENSDART00000146991 | si:ch211-127d4.3  | -0.09259617  | -0.379853865 | -0.53001099  | -0.593912213 |
| ENSDART00000147001 | si:dkeyp-72h1.1   | -0.667988087 | -0.713655804 | -0.172938308 | 0.232582151  |
| ENSDART00000147004 | oxsr1b            | -0.068072204 | -0.071587779 | -0.30197654  | -0.095099951 |
| ENSDART00000147009 | si:dkey-251i10.2  | 2.257544115  | 2.36261429   | 1.933731915  | 0.997576718  |
| ENSDART00000147019 | si:ch211-235o23.1 | 0.394717538  | 0.700152429  | 0.448882118  | 0.273599764  |
| ENSDART00000147068 | olfml2ba          | -0.192176717 | 0.036009408  | -0.274084705 | -0.587185898 |
| ENSDART00000147105 | tdh               | -0.645059373 | -0.498416454 | -0.202501341 | -0.068176647 |
| ENSDART00000147110 | tubb6             | 1.236908798  | 0.772404142  | 0.732906531  | -0.307326846 |
| ENSDART00000147137 | si:dkey-161j23.6  | -1.245759967 | -0.352718506 | 0.050703213  | 0.033267232  |
| ENSDART00000147175 | si:dkeyp-69c1.7   | -0.274009215 | -0.118199859 | 0.157998072  | 0.359473526  |
| ENSDART00000147188 | trpm3             | -0.625119804 | -0.737554924 | -0.108574358 | 0.285413653  |
| ENSDART00000147201 | slc5a7a           | -0.334790717 | -0.440092664 | -0.539424926 | -0.607892581 |
| ENSDART00000147217 | atrn1a            | -0.191475884 | -0.379227232 | -0.255587915 | -0.309192132 |
| ENSDART00000147218 | efna3a            | -0.679676128 | -0.850928012 | -0.177104508 | -0.025688419 |
| ENSDART00000147246 | MPP4 (1 of many)  | -0.296462508 | -0.373112158 | -0.170989023 | -0.099561343 |
| ENSDART00000147264 | fam213b           | 0.418860252  | 0.552271711  | 0.440362956  | 0.212029386  |
| ENSDART00000147265 | rpl8              | 1.326651746  | 0.800643986  | 0.962132043  | 0.631592879  |
| ENSDART00000147275 | plat              | 0.870075522  | 0.84761039   | 0.802236758  | 0.134643658  |
| ENSDART00000147285 | tomm70a           | -0.111704054 | -0.295896007 | -0.277787909 | -0.179585993 |
| ENSDART00000147308 | amigo1            | -0.366406631 | -0.580638611 | -0.462226604 | -0.20619589  |
| ENSDART00000147318 | zgc:123105        | -0.365732482 | -0.633059491 | -0.048801121 | 0.05490191   |
| ENSDART00000147341 | tubb4b            | 0.566193096  | 0.992023395  | -0.136369873 | 0.130190834  |
| ENSDART00000147343 | dnase2            | 0.744692712  | 0.455061161  | 0.199303414  | -0.152365099 |
| ENSDART00000147368 | osbp2             | -0.137018463 | -0.22987814  | -0.404444797 | -0.125629393 |
| ENSDART00000147377 | si:ch211-218c6.8  | 0.580687503  | 0.496233306  | 0.169999239  | -0.049284637 |
| ENSDART00000147394 | rcvrna            | -0.601511252 | -0.165338563 | -0.351313293 | -0.435988789 |
| ENSDART00000147422 | arhgap23b         | -0.106264079 | -0.33507693  | -0.670558797 | -0.201207875 |
| ENSDART00000147439 | atp6v0b           | -0.143289001 | -0.224190834 | -0.266752197 | -0.126455259 |
| ENSDART00000147461 | pih1d1            | 2.042300587  | 3.359045894  | 1.936071133  | 3.025420547  |
| ENSDART00000147464 | ryr3              | -0.823352364 | -0.716491782 | 0.05941278   | 0.608108075  |
| ENSDART00000147473 | pcsk1             | -0.408472737 | -0.345735504 | -0.351470668 | -0.372482226 |
| ENSDART00000147474 | stmn2b            | 0.410261377  | 1.543598694  | 2.044768785  | 1.667647819  |
| ENSDART00000147481 | phf11             | 2.519105146  | 2.056646778  | 4.198159431  | 2.169035406  |
| ENSDART00000147483 | ephb6             | -0.346946617 | -0.195722816 | 0.204471928  | 0.396713027  |
| ENSDART00000147496 | wsb1              | 0.50240599   | 0.657726247  | 0.306985059  | 0.144649209  |
| ENSDART00000147502 | grhprb            | 0.278026338  | -0.217638113 | -0.512645749 | -0.092734666 |
| ENSDART00000147504 | bzw2              | 0.031120244  | -0.513458671 | -0.643056049 | -0.325765553 |
| ENSDART00000147516 | si:ch73-343l4.8   | 0.629933021  | 0.124466643  | -0.147547456 | -2.286690979 |
| ENSDART00000147518 | fam89b            | 0.288965136  | 0.576511697  | 0.598868415  | 0.448283091  |
| ENSDART00000147527 | si:dkey-9i23.14   | 2.675666068  | 2.038792867  | 2.055161538  | 1.544748993  |
| ENSDART00000147581 | celf5b            | -0.452125975 | -0.583204528 | -0.153939994 | -0.143297487 |

|                    |                   |              |              |              |              |
|--------------------|-------------------|--------------|--------------|--------------|--------------|
| ENSDART00000147582 | agmo              | -0.172065266 | -0.060434285 | -0.409289881 | -0.408628944 |
| ENSDART00000147609 | shc1              | -0.131375988 | 0.113051171  | 0.56388659   | 0.681815315  |
| ENSDART00000147617 | bcl2l1            | 0.692333613  | 0.690280735  | 0.392732217  | 0.224132994  |
| ENSDART00000147625 | pik3r3b           | -0.257748291 | 0.021181096  | 0.371087748  | 0.412468691  |
| ENSDART00000147635 | gpd1c             | 0.454472166  | 0.231690448  | 0.167995006  | -0.010446218 |
| ENSDART00000147658 | bhlhe22           | -0.302235414 | -0.31899187  | -0.305987775 | -0.102192149 |
| ENSDART00000147682 | atp1a1a.2         | 1.135451283  | 0.290531702  | 0.256841542  | -0.140895848 |
| ENSDART00000147683 | inpp4b            | -0.101056224 | -0.522680445 | -0.598179821 | -0.221205188 |
| ENSDART00000147686 | si:dkey-222p3.1   | -0.111715584 | -0.482884964 | -0.578818209 | -0.433340731 |
| ENSDART00000147694 | tm4sf4            | -0.310160873 | 0.021226995  | -0.077203568 | -0.031986481 |
| ENSDART00000147699 | mical3b           | 0.112525626  | 0.108456465  | 0.226887131  | 0.765699718  |
| ENSDART00000147729 | rps24             | 0.371025561  | 0.416364277  | 0.295416172  | 0.004577514  |
| ENSDART00000147731 | BX927329.1        | 0.853591712  | 1.100390597  | 0.929772221  | 0.285035676  |
| ENSDART00000147742 | fgfr1a            | -0.118664773 | -0.073758578 | -0.167833486 | -0.603740653 |
| ENSDART00000147779 | sh3glb2b          | -0.245646809 | -0.296043128 | -0.126401752 | -0.042735049 |
| ENSDART00000147787 | znf512            | 1.743634906  | 1.038845919  | 2.753652323  | 1.346161863  |
| ENSDART00000147789 | slco2a1           | -0.167945299 | -0.15402624  | -0.306762825 | -0.440433916 |
| ENSDART00000147793 | gcdha             | -0.253694486 | -0.123690535 | -0.220775945 | -0.080919569 |
| ENSDART00000147794 | nt5c2l1           | 2.1295515    | 2.541950381  | 3.263642166  | 1.818207515  |
| ENSDART00000147799 | ndrg3b            | -0.751369578 | -0.184479497 | 0.170135881  | -0.060187322 |
| ENSDART00000147820 | carkd             | -0.239894355 | -0.307342094 | -0.0807657   | -0.048288884 |
| ENSDART00000147821 | spsb4a            | 0.371275002  | 0.33311003   | 0.599280348  | 0.314031744  |
| ENSDART00000147826 | jade3             | 0.261388203  | 0.282176502  | 0.335957333  | 0.193451186  |
| ENSDART00000147831 | ACAP2 (1 of many) | -0.265239588 | -0.086744823 | 0.171263201  | 0.342225898  |
| ENSDART00000147849 | klf6a             | 1.130982604  | 1.870693821  | 1.403514717  | 0.445060502  |
| ENSDART00000147851 | eef1b2            | 0.252066551  | 0.849118612  | 0.755935234  | 0.422914839  |
| ENSDART00000147854 | mfap5             | -0.362752481 | -0.424642186 | -0.795916329 | -0.74190928  |
| ENSDART00000147868 | vwc2              | -0.776498099 | -0.767193994 | -0.55435848  | -0.286994867 |
| ENSDART00000147884 | syne2b            | 0.046598878  | -0.495566729 | -1.074400394 | -0.335549303 |
| ENSDART00000147889 | kat5a             | 0.445126528  | 0.474310239  | 0.435051995  | 0.434365446  |
| ENSDART00000147902 | megf11            | -0.496471177 | -0.600303312 | -0.359789074 | -0.208412389 |
| ENSDART00000147903 | lrit1a            | -0.179060864 | -0.15522738  | -0.479781004 | -0.346169989 |
| ENSDART00000147905 | fam213aa          | -0.253972183 | -0.158419429 | -0.284170369 | -0.196877631 |
| ENSDART00000147938 | heg1              | -1.97027775  | -0.730181455 | -5.193199021 | -2.593528186 |
| ENSDART00000147963 | bco2a             | -0.106052135 | -0.070354665 | -0.433217487 | -0.165630718 |
| ENSDART00000147968 | rbpms2b           | -0.96188315  | -0.47610893  | 0.419978504  | 0.426103029  |
| ENSDART00000147991 | g3bp1             | 3.532775357  | 2.102820417  | 2.620663227  | 2.000522751  |
| ENSDART00000147998 | plxna2            | -0.136413264 | -0.347150332 | -0.077394761 | 0.05783618   |
| ENSDART00000148011 | cby1              | 0.256002046  | 0.39067073   | 0.214338805  | 0.125714094  |
| ENSDART00000148038 | lrfn4b            | -0.35705614  | -0.30916456  | 0.014604429  | 0.153474614  |
| ENSDART00000148039 | snx19a            | -0.086070054 | -0.238060141 | -0.431834798 | -0.166151211 |
| ENSDART00000148055 | si:ch211-67e16.11 | -0.532227459 | -0.535880084 | -0.161015502 | 0.246252593  |
| ENSDART00000148066 | znf395b           | -0.110739145 | -0.366906743 | -0.460042969 | -0.183105049 |
| ENSDART00000148073 | shisa7b           | -0.212233425 | -0.392255987 | -0.298336106 | -0.168085028 |
| ENSDART00000148076 | fbxw7             | -0.313125013 | -0.183670552 | -0.007156474 | -0.059168192 |
| ENSDART00000148080 | rnf19b            | 0.061412453  | -0.676245271 | -0.33437989  | -0.030752067 |
| ENSDART00000148106 | mef2aa            | -0.081330082 | -0.55524128  | -0.609035118 | -0.185252531 |
| ENSDART00000148107 | SRCIN1            | -0.358492187 | -0.594267639 | -0.130298738 | 0.102935385  |
| ENSDART00000148120 | ephb2a            | -0.204590684 | -0.196760275 | 0.359222548  | 0.385663441  |
| ENSDART00000148125 | fam21c            | 0.420817307  | 0.137516364  | 0.034339244  | -0.014273742 |
| ENSDART00000148138 | lrrc8aa           | 0.370743632  | 0.558987897  | 0.552524282  | 0.096775057  |

|                    |                   |              |              |              |              |
|--------------------|-------------------|--------------|--------------|--------------|--------------|
| ENSDART00000148154 | stx2a             | 0.73746977   | 1.316523952  | 0.880682553  | 0.300142462  |
| ENSDART00000148163 | frmd4bb           | 0.943172358  | 1.400649402  | 1.507648518  | 0.548522517  |
| ENSDART00000148175 | si:ch1073-440b2.1 | -0.235967394 | -0.243649374 | -0.449710659 | -0.316169237 |
| ENSDART00000148181 | inpp4aa           | -0.260407808 | -0.050773424 | 0.267315477  | 0.333876837  |
| ENSDART00000148199 | stxbp1a           | -0.541285454 | -0.573795052 | -0.292066803 | -0.020658402 |
| ENSDART00000148213 | yipf6             | -0.115338541 | -0.114709124 | -0.248877885 | -0.220567506 |
| ENSDART00000148236 | tmem179b          | 0.928914935  | 1.103132699  | 0.9233627    | 0.146290121  |
| ENSDART00000148246 | pole4             | -0.080211224 | -0.333184545 | -0.567162517 | -0.350297708 |
| ENSDART00000148249 | plppr4b           | -0.24256353  | -0.068311603 | 1.098973668  | 1.360337893  |
| ENSDART00000148278 | klf11a            | -0.030586225 | 0.176099641  | 0.85687578   | 0.762070868  |
| ENSDART00000148280 | prr18             | 0.103510486  | 0.905956065  | 1.016662607  | 0.752186459  |
| ENSDART00000148296 | tnni1d            | 0.552273501  | 5.279876604  | 5.419924358  | 3.332159231  |
| ENSDART00000148304 | myo1f             | 0.706981048  | 0.452539664  | 0.150931707  | -0.296211435 |
| ENSDART00000148306 | map2              | -0.504312708 | -0.348446647 | -0.171538441 | 0.068561288  |
| ENSDART00000148327 | adamtsl7          | 2.218956465  | 1.395778664  | 0.846103004  | 0.026559812  |
| ENSDART00000148353 | usf2              | -0.107987138 | -0.265954127 | -0.405201274 | -0.200197809 |
| ENSDART00000148388 | smox              | 1.14663E-15  | 4.65884204   | 4.212605499  | 2.256263175  |
| ENSDART00000148398 | MRAS (1 of many)  | 1.275583164  | 1.112018386  | 0.557077896  | 0.217843634  |
| ENSDART00000148405 | si:ch211-113g11.6 | -0.63339569  | -0.861477951 | -0.083811842 | 0.259008105  |
| ENSDART00000148422 | BX649485.3        | 1.236550789  | 0.98767472   | 0.358686087  | -0.350942213 |
| ENSDART00000148432 | ptp4a3            | 0.27125556   | 0.468426427  | 0.608500351  | -0.013500628 |
| ENSDART00000148447 | hnrnpaba          | 0.222094219  | 0.226002223  | 0.267110054  | 0.234088848  |
| ENSDART00000148456 | abcb4             | -0.551564057 | -0.079040965 | -0.313501093 | -1.124934266 |
| ENSDART00000148459 | cbx1b             | -2.930250472 | -0.688512699 | 0.434984356  | 0.566379272  |
| ENSDART00000148465 | slc1a1            | -0.751249091 | -0.22594806  | 0.456533505  | 0.753777978  |
| ENSDART00000148475 | cspg5a            | 0.090085539  | 0.726711302  | 1.793409667  | 1.632985142  |
| ENSDART00000148531 | arhgef25b         | -0.052778378 | -0.311697766 | -0.416645212 | -0.115394554 |
| ENSDART00000148536 | GK3P              | -0.308304163 | -0.269790809 | -0.586409039 | -0.39358576  |
| ENSDART00000148537 | rora              | -0.160828233 | -0.221872095 | -0.45696721  | -0.083100906 |
| ENSDART00000148540 | fech              | 0.007306354  | 0.381217581  | -0.12547162  | -0.024425403 |
| ENSDART00000148564 | si:ch211-236p22.1 | -0.699364761 | -0.998683731 | -0.566423622 | -0.06995253  |
| ENSDART00000148570 | atp2b1b           | -0.232205009 | -0.177768331 | -0.430678176 | 0.039634464  |
| ENSDART00000148576 | pygmb             | -0.380093922 | -0.425025096 | -0.447938233 | -0.092571282 |
| ENSDART00000148580 | BX005108.2        | -0.474486107 | -0.575204555 | -0.246024325 | -0.012613897 |
| ENSDART00000148582 | smpd1             | 0.404585024  | 0.130204031  | 0.022544887  | -0.113079466 |
| ENSDART00000148590 | coro2ba           | -0.3608902   | -0.079968694 | -0.141782791 | 0.048751465  |
| ENSDART00000148601 | insig1            | -0.03765091  | 0.839125818  | 0.622258944  | 0.165134159  |
| ENSDART00000148639 | ubxn2a            | -0.292754646 | -0.267419804 | -0.368360861 | -0.228619688 |
| ENSDART00000148643 | phkb              | -0.170217144 | -0.13328883  | -0.2898938   | -0.026363851 |
| ENSDART00000148648 | rps25             | 0.412929704  | 0.39629643   | 0.197445263  | 0.016589956  |
| ENSDART00000148653 | tmem145           | -0.454635973 | -0.21216688  | -0.078241248 | 0.035128268  |
| ENSDART00000148659 | clip2             | 0.500760868  | 0.904821279  | 1.156870185  | 0.693646301  |
| ENSDART00000148661 | stat2             | 0.11967996   | -0.016653911 | 1.354000143  | 0.023510931  |
| ENSDART00000148662 | kcnc3a            | -0.800710128 | -1.106624714 | -0.368118634 | 0.013489304  |
| ENSDART00000148737 | btk               | 1.027482823  | 0.714086499  | 0.58431037   | 0.237640489  |
| ENSDART00000148741 | met               | 0.874910977  | 0.435904294  | -0.125027531 | -0.62235308  |
| ENSDART00000148764 | ednrbb            | 1.564011968  | 2.847115487  | 1.8915508    | 0.999631285  |
| ENSDART00000148766 | dpf2              | 1.058462293  | 0.640887505  | 0.623810049  | 0.633616815  |
| ENSDART00000148786 | exoc5             | 0.05617118   | 0.166256406  | 0.294936832  | 0.214091952  |
| ENSDART00000148789 | wfs1b             | 0.104249443  | 0.302506651  | 0.278674006  | 0.047812088  |
| ENSDART00000148794 | jupb              | -0.404857846 | -0.638395215 | -0.40436567  | -0.262479222 |

|                    |                    |              |              |              |              |
|--------------------|--------------------|--------------|--------------|--------------|--------------|
| ENSDART00000148795 | dpf2               | 0.12341877   | -0.325727004 | -0.660147455 | -0.013247322 |
| ENSDART00000148802 | nexn               | -0.381565638 | -0.122933428 | -0.397541694 | -0.196186804 |
| ENSDART00000148822 | adgrg1             | 0.746405238  | 1.031170771  | 0.764826924  | 0.143644812  |
| ENSDART00000148831 | fgf11b             | -0.269342716 | -0.341549392 | -0.474527478 | -0.280873475 |
| ENSDART00000148834 | si:ch1073-155h21.2 | -0.200452217 | -0.231957247 | -0.32585922  | -0.162282019 |
| ENSDART00000148845 | BX649485.4         | 2.24411597   | 1.39694109   | 1.224587369  | -0.358910932 |
| ENSDART00000148894 | serpinb14          | 0.554435408  | 1.134239409  | 1.417283925  | 0.684075923  |
| ENSDART00000148900 | kcnc2              | -0.819802341 | -0.972756522 | -0.275729768 | 0.337871594  |
| ENSDART00000148927 | tgfb2              | 0.452467242  | 0.589301589  | 0.923363405  | 0.590115295  |
| ENSDART00000148930 | lingo4b            | -0.229730557 | -0.308881186 | -0.199125951 | -0.339156928 |
| ENSDART00000148958 | fam150a            | -0.081185595 | -0.392189222 | -0.650641125 | -0.329645149 |
| ENSDART00000148963 | BX649485.1         | 1.148936794  | 0.907522814  | 0.409280883  | -0.023295659 |
| ENSDART00000148971 | ctbp2a             | -0.618298464 | -0.594645977 | -0.414478241 | -0.261581238 |
| ENSDART00000148975 | CU657977.1         | 0.934819878  | 0.853574256  | 0.944102682  | 0.804503627  |
| ENSDART00000148982 | bin1b              | 0.009431427  | -0.214307092 | -0.49686004  | -0.050411548 |
| ENSDART00000148984 | rpl31              | 0.518485066  | 0.61867131   | 0.274282849  | 0.246502602  |
| ENSDART00000148993 | hdac6              | 0.150136767  | 0.327518494  | 0.405976253  | 0.20477563   |
| ENSDART00000148997 | nos1apa            | -0.375839925 | -0.17136424  | -0.288037974 | -0.136490158 |
| ENSDART00000149019 | itpr1a             | 0.453945089  | 0.40663332   | 0.191730219  | 0.048560775  |
| ENSDART00000149024 | btbd7              | -0.242016986 | -0.307624283 | -0.194506419 | -0.161017473 |
| ENSDART00000149029 | sagb               | -0.046274749 | -0.449576755 | -0.950069775 | -0.043925247 |
| ENSDART00000149032 | oat                | -0.368235431 | -0.40939103  | -0.17630927  | -0.009811502 |
| ENSDART00000149041 | reep1              | -0.249037096 | 0.218537351  | 0.449912583  | 0.370752516  |
| ENSDART00000149043 | CR855300.1         | 0.458598352  | 0.519077258  | 0.374073731  | 0.109291075  |
| ENSDART00000149074 | sall1b             | 1.974229239  | 2.883794957  | 2.506155499  | 1.735121972  |
| ENSDART00000149079 | sagb               | -0.468101765 | -0.230897218 | -0.419750319 | -0.182809331 |
| ENSDART00000149089 | anxa11b            | 0.040867541  | 0.398676842  | 0.148460283  | -0.067955816 |
| ENSDART00000149115 | zgc:158659         | 1.901261478  | 2.561373529  | 3.048076346  | 2.366410956  |
| ENSDART00000149121 | clcf1              | 1.771744054  | 1.594454703  | 1.360720614  | 0.466339861  |
| ENSDART00000149151 | sptbn2             | -0.256411956 | -0.316484744 | -0.145496042 | 0.017178704  |
| ENSDART00000149158 | dmxl2              | -0.239475556 | -0.38571718  | -0.12120231  | 0.150747303  |
| ENSDART00000149169 | ssr2               | 0.474946343  | 0.309006192  | 0.206925318  | -0.029893306 |
| ENSDART00000149171 | srp9               | -0.011162136 | -0.135869324 | -0.296581397 | -0.280358452 |
| ENSDART00000149175 | pou4f3             | -1.520089487 | -1.231379123 | 0.357488642  | 0.743891028  |
| ENSDART00000149198 | epas1a             | 0.235051634  | 0.343796351  | 0.502704685  | -0.080436042 |
| ENSDART00000149200 | anxa11b            | 1.743372734  | 3.631513258  | 2.108721032  | 3.508584927  |
| ENSDART00000149204 | si:dkey-85n7.7     | 2.603000794  | 2.822199237  | 2.219318015  | 0.958882963  |
| ENSDART00000149218 | elk3               | 0.538927451  | 0.404579774  | 0.375543991  | 0.048753146  |
| ENSDART00000149222 | pglyrp2            | -0.019258678 | -0.204426336 | -0.652532049 | -2.674820692 |
| ENSDART00000149237 | xirp2a             | 0.190889632  | 0.253883647  | 0.37076536   | 0.19112506   |
| ENSDART00000149260 | nt5c3a             | 0.06053373   | -0.254595189 | -0.368052769 | -0.218176136 |
| ENSDART00000149267 | kel                | 0.933657877  | 1.291347217  | 1.534062377  | 0.13083457   |
| ENSDART00000149276 | lzts3b             | -0.642406039 | -0.470964243 | -0.143114993 | -0.054979203 |
| ENSDART00000149283 | zgc:112001         | -0.707617666 | -0.492468931 | 0.006563399  | 0.231921747  |
| ENSDART00000149297 | slc20a2            | -0.247675699 | -0.319353289 | -0.309560982 | -0.222732695 |
| ENSDART00000149299 | cers2b             | 0.489876545  | 0.297388144  | 0.375525704  | 0.021430111  |
| ENSDART00000149311 | gpr63              | -0.396864855 | -0.311816928 | -0.030936535 | 0.061966221  |
| ENSDART00000149316 | rasa1a             | -0.4434975   | -0.604862985 | 0.040513048  | 0.244834334  |
| ENSDART00000149320 | arl8a              | 0.200543842  | 0.321313695  | 0.387648659  | 0.1981557    |
| ENSDART00000149335 | kcna1a             | -0.92291358  | -0.966385056 | -0.49989391  | -0.001249229 |
| ENSDART00000149339 | si:ch211-175f12.2  | -0.297380973 | -0.332932663 | -0.389357991 | -0.204952824 |



|                    |                      |              |              |              |              |
|--------------------|----------------------|--------------|--------------|--------------|--------------|
| ENSDART00000149350 | fkbp4                | -0.198226552 | -0.122860425 | -0.266664215 | -0.086727437 |
| ENSDART00000149351 | scd                  | -0.095125933 | 1.291914984  | 1.511394876  | 0.539585936  |
| ENSDART00000149352 | si:ch211-163l21.11   | -0.266781177 | -0.351609906 | -0.560319486 | -0.211979525 |
| ENSDART00000149367 | si:ch73-290k24.5     | -0.213839599 | -0.466705261 | -0.018322662 | 0.130528894  |
| ENSDART00000149411 | atxn1b               | -0.356760798 | -0.298446699 | -0.334747495 | -0.251003673 |
| ENSDART00000149425 | SLC25A22 (1 of many) | -0.428786809 | -0.626535356 | -0.125118952 | 0.12464047   |
| ENSDART00000149429 | boka                 | -0.220682727 | -0.305502243 | -0.692638969 | -0.393597854 |
| ENSDART00000149431 | sema4aa              | 1.058121853  | 0.676658919  | 0.239884836  | -0.1730827   |
| ENSDART00000149443 | pcdh19               | -0.547618951 | -0.594468642 | -0.345755383 | 0.11053464   |
| ENSDART00000149468 | rps10                | 2.202930165  | 1.872426465  | 0.292067044  | 0.38759709   |
| ENSDART00000149478 | galns                | 1.09483472   | 0.726913129  | 0.227424057  | 0.052897193  |
| ENSDART00000149486 | def6b                | 4.188632994  | 4.544630212  | 4.117698226  | 0.985190768  |
| ENSDART00000149510 | f13a1b               | 0.823651803  | 0.467086429  | 0.602200924  | 0.078453199  |
| ENSDART00000149512 | CU467655.1           | -0.320227651 | -0.180971804 | -0.440965145 | -0.207148298 |
| ENSDART00000149518 | SLC25A22 (1 of many) | -1.000880918 | -1.544420441 | -0.824653844 | -0.438490591 |
| ENSDART00000149546 | myo15aa              | -0.410128868 | -0.287434444 | -0.355050844 | -0.094306045 |
| ENSDART00000149552 | FP325120.1           | -0.456523138 | -0.25356238  | -0.125718739 | 0.024031302  |
| ENSDART00000149553 | hmgcra               | -0.282814218 | -0.006298507 | 0.4014174    | 0.446278745  |
| ENSDART00000149564 | CU467655.1           | -0.291119215 | -0.167904608 | -0.380163625 | -0.141898613 |
| ENSDART00000149569 | CR848047.1           | -0.094108393 | -0.299800905 | -0.352835774 | -0.193405328 |
| ENSDART00000149574 | ca14                 | -0.121794187 | -0.18625006  | -0.561537732 | -0.325393218 |
| ENSDART00000149584 | gng12a               | 0.603189677  | 0.302272198  | -0.104854769 | -0.377654322 |
| ENSDART00000149594 | ank3b                | -0.174131144 | -0.266770414 | 0.69684285   | 0.78513869   |
| ENSDART00000149600 | tpp1                 | 0.822885392  | 0.356076016  | 0.047488091  | -0.289304028 |
| ENSDART00000149608 | nexn                 | -0.437154987 | -0.289194529 | -0.346094746 | -0.307861675 |
| ENSDART00000149618 | mid1                 | -0.406831126 | -0.160364287 | 0.131354752  | 0.136351442  |
| ENSDART00000149634 | atp6ap2              | -0.108949021 | -0.143807338 | -0.457436101 | -0.199272375 |
| ENSDART00000149652 | AL928685.4           | -0.221690272 | -0.265792933 | -0.407449839 | -0.293257945 |
| ENSDART00000149655 | adam8b               | 1.224022341  | 1.219775985  | 1.033392521  | 0.588329024  |
| ENSDART00000149659 | ezh1                 | 0.045526141  | 0.005041587  | -0.251417621 | -0.327846848 |
| ENSDART00000149666 | dock3                | -0.065088232 | -0.425598201 | -0.009057049 | 0.161364952  |
| ENSDART00000149684 | si:dkeyp-52c3.2      | 2.125770421  | 2.315774699  | 2.351460593  | 2.938761267  |
| ENSDART00000149685 | gnao1a               | -0.290173142 | -0.321971232 | 0.118032615  | 0.301423091  |
| ENSDART00000149689 | mob1bb               | -0.2705299   | -0.18213785  | -0.463988827 | -0.361129298 |
| ENSDART00000149711 | slc4a2b              | 0.638486491  | 0.276788243  | -0.283420926 | -0.322786037 |
| ENSDART00000149730 | stox2a               | 0.026475093  | 0.234017219  | 0.506304198  | 0.292160739  |
| ENSDART00000149740 | si:ch211-149b19.2    | -0.851560484 | -0.688459713 | 0.123433485  | 0.442881876  |
| ENSDART00000149760 | triobpa              | 0.630702727  | 0.141628128  | 0.231366625  | 0.068551496  |
| ENSDART00000149768 | kif21a               | -0.021643242 | 0.361851849  | 0.686688714  | 0.546979573  |
| ENSDART00000149777 | setx                 | 0.020956021  | 0.009824369  | 0.394668282  | 0.077312111  |
| ENSDART00000149784 | scn3b                | 0.168579716  | 0.346498596  | 0.172197933  | 0.640507294  |
| ENSDART00000149786 | dhrsx                | 4.71086866   | 4.438400236  | 3.335716316  | 3.374642973  |
| ENSDART00000149787 | col4a3bpa            | 0.193295875  | 0.430904088  | 0.63143914   | 0.354005578  |
| ENSDART00000149816 | hspp1                | -0.566005876 | -0.156876752 | -0.219080206 | -0.313669761 |
| ENSDART00000149821 | ecsit                | 4.865284679  | 4.410737197  | 4.242321149  | 4.574026911  |
| ENSDART00000149833 | cnga3a               | -0.072993636 | -0.371949035 | -0.58833358  | 0.07281763   |
| ENSDART00000149859 | gldn                 | -0.670802099 | -0.540937826 | -0.034323087 | -0.157128438 |
| ENSDART00000149871 | cx40.8               | 0.501427104  | 0.583813885  | 0.280966778  | -0.058317019 |
| ENSDART00000149878 | otud4                | 0.242358714  | 0.196542793  | 0.87579795   | 0.138730183  |
| ENSDART00000149882 | si:ch211-117c9.1     | 1.22256875   | 0.270055012  | 0.422501128  | 0.414018825  |
| ENSDART00000149910 | abl1                 | 0.087815124  | 0.252042838  | 0.385819934  | 0.051793038  |

|                    |                    |              |              |              |              |
|--------------------|--------------------|--------------|--------------|--------------|--------------|
| ENSDART00000149913 | b4galt1            | 0.757613392  | 0.563165908  | 0.39069258   | 0.030742735  |
| ENSDART00000149914 | aatka              | -0.270082025 | -0.541170375 | -0.440872523 | -0.175726567 |
| ENSDART00000149935 | nt5c3a             | 0.05115392   | -0.273408486 | -0.497911915 | -0.317644766 |
| ENSDART00000149947 | bcl2b              | -0.663523207 | -0.706570637 | -0.112082166 | -0.007869569 |
| ENSDART00000149951 | BX666064.1         | 1.493495344  | 0.978793976  | 0.565382246  | -0.392061768 |
| ENSDART00000149956 | apc                | 0.195183663  | 0.26527048   | 0.385323133  | 0.453680151  |
| ENSDART00000149960 | fasn               | 2.288734609  | 2.375010827  | 1.541557565  | 1.919894603  |
| ENSDART00000149966 | b3gat3             | -0.190835062 | -0.286049968 | -0.133094624 | -0.134465202 |
| ENSDART00000149978 | fabp7a             | 0.33770709   | 0.764013846  | 0.558825405  | 0.488886506  |
| ENSDART00000149992 | si:dkey-231j24.3   | -0.792591394 | -0.543368341 | 0.065178142  | 0.204406436  |
| ENSDART00000149993 | pygmb              | -0.443639651 | -0.459929444 | -0.472379886 | -0.083989126 |
| ENSDART00000150013 | cd276              | 1.481977913  | 1.919249755  | 1.718653495  | 0.833090259  |
| ENSDART00000150023 | slc16a1a           | -2.911491812 | 0.586509109  | -0.148102592 | -0.093926934 |
| ENSDART00000150028 | onecutl            | -0.126745973 | -0.253663984 | -0.285061154 | -0.103777564 |
| ENSDART00000150033 | bin1b              | 0.041335049  | -0.185764451 | -0.523044089 | -0.09192537  |
| ENSDART00000150036 | adam23a            | -0.62166293  | -0.515362417 | 0.016147076  | 0.303932596  |
| ENSDART00000150043 | dhrsx              | -0.370311342 | -3.592572721 | -0.142322612 | -0.462525038 |
| ENSDART00000150045 | adamts18           | -0.187059316 | -0.292648437 | -0.628764119 | 0.030985495  |
| ENSDART00000150050 | hnrnpaba           | 0.395350897  | 0.441973379  | 0.591388417  | 0.200313414  |
| ENSDART00000150064 | cdc14b             | -0.488634498 | -0.055933719 | -0.080964497 | 0.027342931  |
| ENSDART00000150068 | sox6               | -0.111707858 | -0.047191704 | 0.355284385  | 0.700337568  |
| ENSDART00000150072 | si:dkey-85n7.8     | 0.988462904  | 1.496111016  | 1.983172292  | 0.611120113  |
| ENSDART00000150088 | BX649485.2         | 1.751466958  | 1.112873174  | 0.6867673    | -0.722119651 |
| ENSDART00000150116 | alk                | -0.197441993 | -0.291262237 | -0.113299878 | -0.034468735 |
| ENSDART00000150128 | foxp1b             | 0.347545443  | 0.556370195  | 1.342974258  | 1.269825931  |
| ENSDART00000150146 | smarcd3b           | -0.318612181 | -0.278781268 | 0.723080439  | 0.640333876  |
| ENSDART00000150148 | slc7a6             | 0.22923155   | 0.720543979  | 1.05061766   | 1.171565717  |
| ENSDART00000150149 | tdp1               | 0.245251359  | 0.536780821  | 0.276916415  | 0.174119987  |
| ENSDART00000150184 | gpatch4            | 0.624444079  | 0.471783034  | 0.550844363  | 0.152733798  |
| ENSDART00000150190 | ggctb              | -0.381240597 | -0.099058914 | -0.562063682 | -1.136274784 |
| ENSDART00000150201 | MRAS (1 of many)   | 1.00558208   | 0.977546999  | 0.676765678  | 0.026394977  |
| ENSDART00000150228 | chata              | -0.431975216 | -0.532525907 | -0.558690348 | -0.371717362 |
| ENSDART00000150353 | mdh1aa             | -0.527537579 | -0.6816935   | -0.262947    | -0.041325795 |
| ENSDART00000150362 | si:ch211-197k17.3  | -0.145582952 | 0.205377076  | 0.711396584  | 0.681320306  |
| ENSDART00000150376 | ldb1a              | -0.16522649  | -0.276396303 | -0.2812216   | -0.239874431 |
| ENSDART00000150386 | si:ch73-6k14.2     | -0.397499259 | -0.321996107 | -1.565555621 | -1.132350175 |
| ENSDART00000150389 | tmem168a           | 0.525344796  | 0.286469995  | 0.221730459  | 0.080011152  |
| ENSDART00000150391 | si:ch211-214j24.14 | 2.502222784  | 2.698584631  | 2.367333489  | 0.935046128  |
| ENSDART00000150400 | tbc1d2b            | -4.044163911 | -1.453975239 | -0.803224358 | -1.31483616  |
| ENSDART00000150430 | pane1              | 0.044208151  | -3.417207412 | -0.655487552 | -0.439296687 |
| ENSDART00000150484 | BX465862.4         | 1.071580051  | 0.886976814  | 0.477743025  | 0.134467836  |
| ENSDART00000150553 | fam19a5a           | -0.538194047 | -0.928835726 | -0.2762266   | 0.015308786  |
| ENSDART00000150580 | BX649307.1         | 0.257402348  | 0.657324095  | 0.496054556  | 0.285668011  |
| ENSDART00000150651 | BX465862.4         | 0.896323656  | 0.956165673  | 0.709439713  | 0.378868912  |
| ENSDART00000150692 |                    | 0.448027135  | 0.604850915  | 0.68748119   | 0.482541087  |
| ENSDART00000150751 | CR293532.1         | 1.967646607  | 1.446997774  | 2.118831868  | 1.197447208  |
| ENSDART00000150789 | USMG5              | -0.285153636 | -0.258859464 | -0.457141251 | -0.093210696 |
| ENSDART00000150839 | fam57bb            | -0.627521697 | -0.387137362 | 0.25664183   | 0.060693872  |
| ENSDART00000150863 | nrp2a              | 0.543372402  | 0.197731133  | 0.582446066  | 0.760458596  |
| ENSDART00000150919 | si:ch211-191i18.2  | 1.045780222  | 1.362401557  | 0.586788909  | 0.260330898  |
| ENSDART00000150927 | ubl7b              | 0.617142901  | 0.651681168  | 0.305601173  | 0.171994365  |

|                    |                    |              |              |              |              |
|--------------------|--------------------|--------------|--------------|--------------|--------------|
| ENSDART00000150932 | lpcat1             | 1.824153615  | 2.726791026  | 2.775021546  | 2.58536861   |
| ENSDART00000150934 | alg6               | 0.502789869  | 0.534691837  | 0.441461289  | 0.13055149   |
| ENSDART00000150940 | si:ch211-193k19.2  | 1.599024227  | 0.310661889  | 0.753508784  | 0.054490277  |
| ENSDART00000150949 | nfyc               | -0.535274529 | -0.301463031 | -0.212807295 | 0.074596031  |
| ENSDART00000150955 | bmpr2a             | -0.667543016 | -0.436786519 | -0.136898455 | 0.053141678  |
| ENSDART00000150958 | lrrc4ba            | -0.155064877 | -0.413501981 | -0.171991106 | -0.022578699 |
| ENSDART00000150961 | wdr91              | 4.358324282  | 4.633846856  | 4.480446443  | 4.649897846  |
| ENSDART00000150975 | smad7              | -0.404377575 | -0.517444405 | -0.473359841 | -0.49979754  |
| ENSDART00000151013 | ensaa              | -0.338295629 | -0.414678183 | -0.638369138 | -0.341312384 |
| ENSDART00000151022 | si:ch211-191i18.4  | -0.318627462 | -0.467051418 | -0.723047751 | -0.473341501 |
| ENSDART00000151044 | baz2ba             | 2.371956879  | 3.808025242  | 3.802702579  | 3.968575995  |
| ENSDART00000151084 | uqcrb              | -0.019553677 | -0.080328791 | -0.732409977 | -0.191112562 |
| ENSDART00000151099 | cacng5a            | -0.404305845 | -0.269968357 | -0.142737848 | 0.07277718   |
| ENSDART00000151127 | thraa              | -0.798583389 | -0.802364861 | -0.351487338 | -0.589241182 |
| ENSDART00000151143 | rbfox1             | -0.676737106 | -0.648326228 | 0.275380809  | 0.524086709  |
| ENSDART00000151158 | ncaldb             | 0.047289673  | -1.437087464 | -0.332259167 | 0.054087527  |
| ENSDART00000151189 | sept12             | -0.01197373  | -0.348568497 | -0.258432997 | -0.257716236 |
| ENSDART00000151195 | march7             | -0.18277274  | 0.240052097  | 0.74148711   | 0.799803253  |
| ENSDART00000151200 | mmp17a             | -0.370431866 | -1.068890772 | -0.706081815 | -0.179291377 |
| ENSDART00000151203 | rgs9a              | -0.190499153 | -0.256482975 | -0.462262315 | -0.086082277 |
| ENSDART00000151205 | aldh1l1            | 0.651327821  | 0.835468293  | 0.448149629  | 0.158439741  |
| ENSDART00000151229 | kcnj5              | -0.403592435 | -0.680204447 | -0.664541848 | -0.399506515 |
| ENSDART00000151235 | rcvrn3             | -0.033671108 | -0.144752489 | -0.498884135 | -0.315369716 |
| ENSDART00000151237 | oxnad1             | 0.332718432  | 0.237746325  | 0.070395116  | 0.076154746  |
| ENSDART00000151246 | gnb3b              | -0.446677088 | -0.413500571 | -0.183093758 | -0.072200588 |
| ENSDART00000151247 | scn1lab            | 0.293159534  | 0.684635422  | 0.628869811  | 0.299982725  |
| ENSDART00000151252 | myo10l1            | -0.09485067  | -0.323915115 | 0.494165668  | 0.855040148  |
| ENSDART00000151282 | si:ch73-248e21.5   | 0.830287534  | 0.642657587  | 0.149520253  | -0.453672012 |
| ENSDART00000151299 | scn8ab             | -0.339946061 | -0.372438378 | 0.28752079   | 0.526264643  |
| ENSDART00000151305 | slc16a6b           | -0.420275567 | -0.158970487 | -0.073625291 | -0.053092638 |
| ENSDART00000151311 | GPR161 (1 of many) | 0.101386436  | 0.588870162  | 0.204324291  | -0.302118942 |
| ENSDART00000151322 | KRT18 (1 of many)  | 3.074943635  | 2.466392918  | 2.650579676  | 1.467715456  |
| ENSDART00000151342 | arhgap42a          | 0.69255684   | 0.716882566  | 0.356486042  | 0.299890281  |
| ENSDART00000151358 | rgl3a              | -0.536133566 | -0.674550597 | -0.735844208 | -0.535493428 |
| ENSDART00000151383 | eif1b              | 0.629753576  | 0.386164956  | 0.580421795  | 0.441741802  |
| ENSDART00000151386 | CU659670.1         | -0.061309281 | -0.197320939 | -0.510180812 | -0.129307388 |
| ENSDART00000151390 | si:ch211-195b13.1  | 0.447846827  | 0.275025282  | 0.031728831  | 0.543393224  |
| ENSDART00000151393 | zak                | 0.559981256  | 0.606971645  | 0.291742344  | 0.078029866  |
| ENSDART00000151399 | pak7               | -0.095169867 | -0.142909818 | -0.239638425 | 0.065715442  |
| ENSDART00000151404 | abat               | -0.288767469 | -0.303619722 | -0.197451372 | -0.147078748 |
| ENSDART00000151419 | tgfa               | -0.147139604 | -0.1316737   | -0.368157435 | -0.244071655 |
| ENSDART00000151423 | c1ql3b             | -0.428342943 | -0.592751887 | -0.458841393 | -0.097254864 |
| ENSDART00000151448 | vamp4              | 0.36274105   | 0.703182259  | 0.708668654  | 0.04883985   |
| ENSDART00000151467 | slc44a2            | 1.227786397  | 2.405127088  | 2.406151956  | 1.882399418  |
| ENSDART00000151489 | LRRC2              | -0.220896871 | -0.332799828 | -0.436191804 | -0.38527929  |
| ENSDART00000151514 | wipi1              | -0.487231741 | -0.283410935 | -0.040753743 | -0.07881031  |
| ENSDART00000151547 | pnpla7a            | 0.300123054  | 0.241347051  | 0.10241403   | -0.203931018 |
| ENSDART00000151550 | usp8               | 0.146844734  | 0.224801555  | 0.32026745   | 0.237867483  |
| ENSDART00000151567 | sgk494b            | -0.371209064 | -0.282108451 | -0.446431854 | -0.117181288 |
| ENSDART00000151571 | ahdc1              | -0.753523402 | -0.774930454 | -0.265860844 | -0.025283973 |
| ENSDART00000151586 | ftf56              | 2.21645788   | 0.879044173  | 3.24618964   | 0.72203566   |

|                    |                    |              |              |              |              |
|--------------------|--------------------|--------------|--------------|--------------|--------------|
| ENSDART00000151611 | BX537277.4         | -0.440906854 | -0.477467469 | -0.367060961 | -0.356985579 |
| ENSDART00000151613 | lhfp12a            | 2.211015019  | 2.8976425    | 2.404140419  | 1.864383361  |
| ENSDART00000151627 | si:ch73-362m14.2   | -1.029772234 | -1.504293907 | -1.467613461 | -0.562650292 |
| ENSDART00000151634 | tnrc6c1            | -0.074330004 | -0.222991449 | -0.321878312 | -0.006293329 |
| ENSDART00000151648 | ntng2b             | -0.44606387  | -0.406664301 | -0.175135105 | 0.111487092  |
| ENSDART00000151661 | wipf1b             | 0.584481191  | 0.31541115   | 0.189596046  | -0.173471027 |
| ENSDART00000151670 | fbxl16             | -0.100117774 | -0.155204519 | -0.627708744 | -0.129502503 |
| ENSDART00000151672 | si:ch211-276a17.5  | -0.716987346 | -0.427751363 | -0.201345778 | -0.037618143 |
| ENSDART00000151674 | pcdh9              | -0.204552278 | -0.440082629 | -0.022873178 | 0.221939437  |
| ENSDART00000151679 | si:ch73-233k15.2   | 0.305634484  | 0.260016753  | 1.072404438  | -0.272816623 |
| ENSDART00000151685 | lhfp14a            | -0.450299252 | -0.419390296 | -0.093062661 | 0.17106537   |
| ENSDART00000151698 | syt3               | -0.446756628 | -0.536044497 | -0.128625894 | 0.106551311  |
| ENSDART00000151717 | march7             | 0.010098896  | 0.251138543  | 0.521642437  | 0.401235935  |
| ENSDART00000151718 | tns1a              | -0.41721923  | -0.880763022 | -0.123281901 | 0.108356531  |
| ENSDART00000151739 | pax10              | -0.427677153 | -0.286784205 | -0.176549765 | -0.047893912 |
| ENSDART00000151743 | tmem237b           | 0.052429896  | -0.216668621 | -0.455661391 | -0.118191943 |
| ENSDART00000151785 | k1c4               | 0.265672724  | 0.701188452  | 0.757625768  | 0.469102543  |
| ENSDART00000151805 | vamp4              | 0.722926228  | 0.32988105   | 0.08556674   | 0.068052265  |
| ENSDART00000151808 | rcvrn3             | -0.028816037 | -0.156203513 | -0.580402071 | -0.415774036 |
| ENSDART00000151822 | tuba8l4            | 0.798817947  | 0.734886282  | 0.324378588  | 0.272246902  |
| ENSDART00000151842 | lrrn3a             | -0.579197629 | -0.548770022 | -0.143313453 | 0.249550285  |
| ENSDART00000151853 | btbd10a            | -0.220795221 | -0.048228521 | 0.169228662  | 0.338815973  |
| ENSDART00000151874 | gtf2h5             | -0.186830286 | -0.721090531 | -0.840818906 | -0.885273426 |
| ENSDART00000151878 | rab3gap2           | 0.026444427  | 0.181039642  | 0.242597677  | 0.247371128  |
| ENSDART00000151881 | rp1l1b             | -0.468794546 | -0.617233135 | -0.603918539 | -0.270450371 |
| ENSDART00000151892 | BX248324.2         | 1.389473856  | 2.137590244  | 1.979774015  | 1.113747327  |
| ENSDART00000151899 | ldlrb              | -0.013482381 | 0.739364147  | 1.30137615   | 0.56832803   |
| ENSDART00000151904 | foxn3              | -0.402174688 | -0.533042351 | -0.141780798 | 0.022724604  |
| ENSDART00000151915 | ptchd1             | -0.713611001 | -0.66822522  | 0.042208909  | 0.328774722  |
| ENSDART00000151920 | si:ch211-140m22.7  | -0.371308279 | -0.473110833 | -0.103450206 | 0.052557108  |
| ENSDART00000151921 | dnmt3ab            | -0.131014471 | -0.104325638 | 0.10563751   | 0.340310238  |
| ENSDART00000151970 | si:ch211-248l17.3  | -0.372087768 | -0.337523565 | 0.171433041  | 0.720267147  |
| ENSDART00000151999 | ttc27              | 0.537657382  | 0.63628465   | 0.751878141  | 0.471568333  |
| ENSDART00000152000 | hectd1             | 2.43305833   | 3.547853034  | -1.454489893 | -0.017509384 |
| ENSDART00000152005 | ppp1r13ba          | -0.032736325 | -0.117362615 | -0.454836475 | -0.009028338 |
| ENSDART00000152006 | si:ch211-236p5.3   | -1.010175109 | -0.375171908 | -0.903663548 | -0.553145976 |
| ENSDART00000152011 | DOCK4 (1 of many)  | -0.107148853 | -0.150156526 | 0.321338768  | 0.540658105  |
| ENSDART00000152019 | si:ch211-234p6.5   | -0.203738294 | -0.079554548 | -0.244044589 | -0.027716123 |
| ENSDART00000152068 | AL590149.1         | -0.322191556 | -0.083241136 | -0.42500156  | -0.283301232 |
| ENSDART00000152069 | chst2b             | -0.329630849 | -0.401663244 | -0.360860216 | -0.363893389 |
| ENSDART00000152122 | si:ch211-176g6.2   | 1.234754318  | 1.008584835  | 0.458934208  | -0.407921233 |
| ENSDART00000152128 | MAZ (1 of many)    | -0.18246323  | -0.447481895 | -0.170629979 | -0.120255425 |
| ENSDART00000152145 | si:ch211-207i1.2   | -1.105453902 | -1.700204988 | -2.013950338 | -1.361589232 |
| ENSDART00000152152 | si:ch73-24k9.2     | 1.048518423  | 0.665615029  | 1.113264445  | -0.254081843 |
| ENSDART00000152172 | BX248418.1         | -0.267252802 | -0.476860817 | -0.659952516 | -0.030823789 |
| ENSDART00000152181 | mapta              | -0.246945515 | 0.298203412  | 0.945051693  | 0.777575562  |
| ENSDART00000152195 | si:ch211-113a14.18 | 0.940862394  | 0.989824089  | 1.044244017  | 0.604507986  |
| ENSDART00000152240 | si:ch1073-174d20.2 | 0.11047675   | 0.254355415  | 0.357239942  | 0.147146143  |
| ENSDART00000152253 | kcnj13             | -0.175334575 | -0.22735068  | -0.506366898 | -0.552648836 |
| ENSDART00000152269 | syncrip            | 0.263965684  | 0.255402715  | 0.319958135  | 0.269096167  |
| ENSDART00000152275 | BX908780.3         | -0.123347867 | -0.42152381  | -0.357247701 | -0.183442147 |

|                    |                    |              |              |              |              |
|--------------------|--------------------|--------------|--------------|--------------|--------------|
| ENSDART00000152277 | si:ch73-168d20.1   | 0.909762162  | 0.836471756  | 1.203009656  | 0.352187699  |
| ENSDART00000152284 | si:ch73-301j1.1    | -0.68804704  | -0.624114046 | 1.993753311  | -0.48476616  |
| ENSDART00000152295 | FAM83G             | 1.150380037  | 1.206829236  | 1.079415548  | 0.591155843  |
| ENSDART00000152299 | si:dkey-25o16.4    | 1.175283487  | 1.143366275  | 0.842863117  | 0.368204805  |
| ENSDART00000152318 | si:ch211-286b5.2   | 1.976393579  | 3.213645724  | 2.557166791  | 1.560923939  |
| ENSDART00000152371 | usp2a              | -0.286860533 | -0.506577502 | -0.337595735 | 0.001938619  |
| ENSDART00000152376 | CLSTN2 (1 of many) | -0.314646809 | -0.323760148 | -0.422303692 | -0.021838531 |
| ENSDART00000152378 | tgif1              | 0.194631245  | 0.419803811  | 0.14379228   | -0.205607529 |
| ENSDART00000152388 | CR354435.3         | 1.276581803  | 1.114721557  | 1.265047914  | 0.436655827  |
| ENSDART00000152400 | dbf4b              | 0.645863235  | 0.809166025  | 0.868170031  | 0.806915507  |
| ENSDART00000152409 | mpp3b              | -0.399859226 | -0.270912664 | -0.49906829  | -0.114613724 |
| ENSDART00000152428 | arhgap32a          | -0.870901224 | -0.197122132 | -0.387452332 | -0.355800105 |
| ENSDART00000152429 | si:ch211-22i13.2   | -0.050442481 | -0.183983476 | -0.310965899 | -0.270852228 |
| ENSDART00000152431 | grid1b             | -0.386738283 | -0.602313736 | -0.348261702 | 0.022251996  |
| ENSDART00000152432 | lratb.2            | 0.819163408  | 1.604350772  | -0.35089707  | -0.825333131 |
| ENSDART00000152478 | stambpl1           | 0.081881747  | 0.120249323  | 0.496702134  | 0.282826765  |
| ENSDART00000152479 | si:dkey-58j15.11   | 0.30322392   | 0.88586109   | 0.224237301  | -0.316952944 |
| ENSDART00000152489 | irf3               | -0.152502705 | 0.050924712  | 1.421424509  | -0.375867622 |
| ENSDART00000152510 | ccser2b            | 0.726161978  | 0.836833026  | 1.118702985  | 0.610749876  |
| ENSDART00000152513 | arfip2a            | -0.209731462 | -0.427433763 | -0.319460479 | -0.125960154 |
| ENSDART00000152520 | sh3bgr             | -0.276595165 | -0.180114366 | -0.559026228 | -0.573707548 |
| ENSDART00000152531 | chrna10a           | -0.39848157  | -0.348304481 | -0.425468269 | -0.274269467 |
| ENSDART00000152535 | CR846082.2         | -0.517845666 | -0.356698278 | -0.420655711 | -0.212748903 |
| ENSDART00000152556 | FAM13C             | -0.458278075 | -0.375744323 | -0.341944162 | -0.232139437 |
| ENSDART00000152562 | eif3f              | 0.257721359  | 0.386526337  | 0.235538886  | 0.038968621  |
| ENSDART00000152567 | frmpd2             | -0.319245931 | -0.373961894 | -0.203551264 | -0.037181194 |
| ENSDART00000152580 | nlgn4a             | -0.383612645 | -0.391621152 | -0.368243921 | -0.24740854  |
| ENSDART00000152603 | egln2              | -0.344914112 | -0.184325703 | -0.029073268 | 0.070142585  |
| ENSDART00000152636 | clocka             | 0.008631834  | 0.196030905  | 0.593132542  | 0.426491394  |
| ENSDART00000152641 | dnm3a              | 1.808565272  | 2.497351665  | 2.011092537  | 0.57584064   |
| ENSDART00000152666 | slc25a23a          | -0.288940584 | -0.374696227 | 0.31705403   | 0.139123262  |
| ENSDART00000152672 | zgc:152977         | -0.296261868 | -0.305183243 | -0.595435728 | -0.424752212 |
| ENSDART00000152678 | ifit10             | 0.50194473   | 0.092674262  | 4.442632616  | 1.169305685  |
| ENSDART00000152680 | pyyb               | 2.62463081   | 4.023644413  | 3.815932945  | 2.663962921  |
| ENSDART00000152689 | oplah              | -0.018001137 | -0.164313071 | -0.461321001 | -0.221934453 |
| ENSDART00000152699 | si:ch211-286b5.9   | 1.056007406  | 0.325301277  | 0.188178466  | -0.341462888 |
| ENSDART00000152703 | BX901920.1         | -0.098796288 | 0.57736287   | 0.482412674  | 0.325371495  |
| ENSDART00000152720 | MARK4 (1 of many)  | -0.106851349 | -0.112526868 | -0.273643684 | -0.009380005 |
| ENSDART00000152766 | CR354435.4         | 0.814174745  | 0.989990518  | 0.663039704  | 0.339445782  |
| ENSDART00000152768 | si:ch211-207i1.2   | -0.201357893 | -0.51029626  | -0.665018804 | -0.121583536 |
| ENSDART00000152780 | tex2l              | -0.378255597 | -0.430378354 | -0.394491857 | -0.23990429  |
| ENSDART00000152788 | mki67              | 1.022403776  | 0.934711217  | 0.634468641  | 0.246495311  |
| ENSDART00000152789 | etaa1              | 1.060104568  | 1.006586924  | 0.636303316  | 0.452429723  |
| ENSDART00000152844 | cdc42ep1a          | -0.176432004 | -0.234011448 | -0.309447838 | -0.303047875 |
| ENSDART00000152855 | prdx1              | 2.014399342  | 2.912277881  | 2.532639813  | 2.043057891  |
| ENSDART00000152858 | rcan2              | -0.344037465 | -0.451039286 | -0.208970338 | -0.321499331 |
| ENSDART00000152879 | ablim2             | -0.320970088 | -0.240571783 | -0.134413966 | 0.04563774   |
| ENSDART00000152892 | slc16a8            | 2.182950408  | 0.789162193  | -0.768133939 | -1.779969995 |
| ENSDART00000152907 | si:ch1073-184j22.2 | 0.289101439  | 0.219661264  | 0.052983655  | 0.072807111  |
| ENSDART00000152924 | stxbp4             | 0.009805274  | -0.210366163 | 0.385226099  | 0.296155125  |
| ENSDART00000152936 | gabr3              | -0.611503657 | -0.756211778 | -0.185809647 | 0.356886347  |

|                    |                    |              |              |              |              |
|--------------------|--------------------|--------------|--------------|--------------|--------------|
| ENSDART00000152942 | jcada              | -0.053928395 | -0.076278472 | -0.332447962 | -0.296311136 |
| ENSDART00000152954 | rrm2               | 3.254915605  | 2.753529904  | 1.974728566  | 1.135298044  |
| ENSDART00000152965 | si:dkeyp-104f11.9  | -0.448853405 | -0.428655614 | -0.583739797 | -0.149977842 |
| ENSDART00000152968 | si:dkey-21c1.1     | 0.134479312  | -0.180316529 | -0.580606373 | -0.202289334 |
| ENSDART00000152973 | RNF157             | -0.237155894 | -0.35583425  | -0.110722293 | 0.097030733  |
| ENSDART00000153013 | eef1db             | 0.150654853  | 0.305331563  | 0.633860114  | 0.458033815  |
| ENSDART00000153022 | AL935194.1         | -0.839883385 | -0.952071296 | -0.323659944 | -0.119202215 |
| ENSDART00000153086 | kctd17             | -0.109500243 | -0.169719356 | -0.312398256 | -0.16098927  |
| ENSDART00000153087 | bmf2               | 0.285623957  | 0.323465948  | 0.348774195  | 0.627801645  |
| ENSDART00000153124 | CU570682.1         | -0.274154453 | -0.462025745 | -0.49154679  | -0.26836126  |
| ENSDART00000153134 | mark3b             | -0.033481129 | -0.166637764 | 0.542361776  | 0.482050901  |
| ENSDART00000153146 | rbfox3a            | -0.546449898 | -0.43963695  | 0.174623158  | 0.484406984  |
| ENSDART00000153167 | hlfb               | -0.470839666 | -0.326611575 | -0.235752692 | -0.264047019 |
| ENSDART00000153177 | mkl2a              | -0.042089487 | -0.340254508 | -0.226976022 | -0.084520833 |
| ENSDART00000153187 | thrab              | -0.362356661 | -0.551240408 | -0.403932333 | -0.192068079 |
| ENSDART00000153190 | vash2              | -0.078136066 | -0.226923996 | -0.395295378 | -0.160874636 |
| ENSDART00000153194 | si:dkey-38p12.3    | 0.25264745   | 0.485169484  | 0.572803819  | 0.07332987   |
| ENSDART00000153199 | afap1              | 0.840574953  | 1.106233667  | 1.438882155  | 1.005659187  |
| ENSDART00000153200 | si:ch211-194k22.8  | 0.210290351  | 0.451170205  | 0.37501933   | 0.225583201  |
| ENSDART00000153212 | adgra1a            | 0.27394507   | 0.382231602  | 0.735064793  | 0.705504548  |
| ENSDART00000153217 | eef1db             | 0.666551397  | 1.483640099  | 2.024242417  | 1.323561336  |
| ENSDART00000153225 | GUCY2C (1 of many) | 3.255008425  | 3.866902647  | 2.201523204  | 2.781639432  |
| ENSDART00000153227 | nfe2l1b            | 0.688085235  | 1.301360444  | 1.138008541  | 0.729999096  |
| ENSDART00000153245 | stxbp4             | -0.144159334 | -0.445073444 | 0.187773192  | 0.216239919  |
| ENSDART00000153247 | si:ch211-120g10.1  | -0.520249419 | -0.414424265 | -0.454570577 | -0.107523144 |
| ENSDART00000153248 | chad1b             | 1.217222776  | 0.847984599  | 0.639882396  | -0.038384888 |
| ENSDART00000153256 | cacna1g            | -0.53708851  | -0.717133052 | -0.415346006 | -0.243050395 |
| ENSDART00000153284 | tbkbp1             | -0.504212532 | -0.489626186 | -0.240468452 | 0.072471561  |
| ENSDART00000153289 | nos1apb            | -0.207119032 | 0.371227589  | 0.722590517  | 0.685079944  |
| ENSDART00000153296 | nsfb               | 0.330739865  | 0.349896221  | -0.030123095 | -0.208569864 |
| ENSDART00000153306 | hcar1-4            | 0.883818254  | 1.413387657  | 1.160612678  | 0.305432292  |
| ENSDART00000153307 | si:ch73-344o19.1   | 0.586530995  | 0.605191095  | 0.75799445   | 0.479323327  |
| ENSDART00000153308 | dcun1d4            | -0.403892315 | -0.460237446 | -0.667559321 | -0.876458812 |
| ENSDART00000153311 | syndig1l           | -0.402504141 | -0.415168554 | -0.17721556  | 0.113761296  |
| ENSDART00000153317 | abracl             | 3.781753376  | 3.851435778  | 3.391861813  | 0.497752701  |
| ENSDART00000153334 | serinc1            | 0.574524524  | 0.605164909  | 0.10821359   | 0.438731193  |
| ENSDART00000153339 | adam17b            | -0.104549731 | -0.262233446 | -0.335652873 | -0.112647107 |
| ENSDART00000153355 | grin2cb            | -0.524459194 | -0.47344108  | -0.357891852 | 0.017542632  |
| ENSDART00000153375 | CU571074.1         | -0.192846631 | -0.331910339 | -0.069344033 | 0.142583214  |
| ENSDART00000153377 | eef1db             | 0.533867077  | 0.950085432  | 1.385417409  | 1.0336151    |
| ENSDART00000153390 | gpam               | -0.267998677 | -0.071527709 | 0.102371515  | 0.045213236  |
| ENSDART00000153391 | otofa              | -0.790883428 | -1.357026899 | -0.581227909 | -0.190433713 |
| ENSDART00000153442 | rxfp2a             | -0.191591927 | -0.398184153 | -0.707111514 | -0.312025768 |
| ENSDART00000153445 | exoc7              | 3.557809232  | 3.85646058   | 3.295092173  | 3.102150432  |
| ENSDART00000153452 | hsp90ab1           | 0.284157203  | 0.639252574  | 0.548907136  | 0.495783326  |
| ENSDART00000153491 | si:dkey-238d18.5   | 0.983293911  | 0.529719125  | 0.777356871  | -0.049086963 |
| ENSDART00000153510 | si:ch73-160l8.2    | 0.056068509  | 0.128148598  | 1.161251796  | 0.352706117  |
| ENSDART00000153514 | si:ch211-121j5.4   | -0.438676742 | -0.189457468 | -0.187818697 | -0.117536785 |
| ENSDART00000153562 | ppfia3             | -0.022654827 | 0.232304266  | 0.485406891  | 0.444415736  |
| ENSDART00000153570 | AL808129.1         | -0.250097653 | -0.308065347 | -0.243803188 | 0.04714878   |
| ENSDART00000153591 | si:dkey-56f14.7    | -0.35474859  | -0.1685547   | -0.219665386 | -0.050831688 |

|                    |                   |              |              |              |              |
|--------------------|-------------------|--------------|--------------|--------------|--------------|
| ENSDART00000153619 | thsd7ab           | -0.196544647 | -0.395072863 | -0.388102838 | -0.013196959 |
| ENSDART00000153654 | piezo2a.2         | 0.718362747  | 0.545453706  | 0.495090248  | 0.182038228  |
| ENSDART00000153657 | trim3a            | 0.068235605  | 0.356875561  | 0.585605002  | 0.467600874  |
| ENSDART00000153666 | AL732567.1        | 0.845331402  | 1.050170733  | 0.86587331   | 0.828206988  |
| ENSDART00000153673 | kcnb1             | -0.632196562 | -0.836186932 | -0.481100002 | -0.109364665 |
| ENSDART00000153700 | BX088707.1        | 0.029406694  | 0.3559423    | 0.787563577  | 0.447534651  |
| ENSDART00000153704 | anks1ab           | -0.440221806 | -0.75898091  | -0.133742531 | 0.137005152  |
| ENSDART00000153730 | CU856222.1        | -0.553584022 | -0.481855955 | -0.007954528 | 0.343506731  |
| ENSDART00000153731 | si:dkey-79d12.5   | 1.619937595  | 1.685958359  | 0.880018827  | 0.052586274  |
| ENSDART00000153743 | rp1l1a            | -0.216164399 | -0.344666036 | -0.324542341 | -0.024409204 |
| ENSDART00000153751 | rnf146            | 2.626965217  | 2.377858038  | 3.541283251  | 3.121825847  |
| ENSDART00000153773 | cipca             | -0.044231438 | -0.31334692  | -0.44667945  | -0.17971329  |
| ENSDART00000153824 | napba             | -0.634929885 | -0.324273151 | -0.096308603 | 0.10005339   |
| ENSDART00000153828 | atp2b3b           | -0.474522045 | -0.66566516  | -0.285016921 | 0.075707306  |
| ENSDART00000153834 | sypl1             | 0.749942367  | 0.493446597  | 0.028135514  | -0.603815485 |
| ENSDART00000153841 | lmcd1             | 1.804357101  | 2.873087613  | 2.523453656  | 2.002290777  |
| ENSDART00000153847 | si:dkey-7i4.24    | 4.195698891  | 4.052966176  | 3.712547417  | 1.148430087  |
| ENSDART00000153897 | ndnfl             | -0.781136652 | -1.071097643 | -0.053351937 | 0.577095222  |
| ENSDART00000153904 | si:dkey-108k21.7  | -0.206298886 | -0.326824637 | -0.265415499 | -0.00099298  |
| ENSDART00000153925 | fut9a             | -0.379466906 | -0.312742341 | -0.333889875 | -0.027131911 |
| ENSDART00000153937 | prkd1             | -0.431650217 | -0.382419593 | -0.495097396 | -0.310742086 |
| ENSDART00000153944 | grm8a             | -0.44814853  | -0.63071211  | -0.403185415 | 0.043396209  |
| ENSDART00000153950 | si:dkey-106n21.1  | 1.634202521  | 0.388901976  | 0.409369194  | 0.514423363  |
| ENSDART00000153951 | myo18ab           | 0.15536019   | 0.13591756   | 0.249484283  | 0.108775298  |
| ENSDART00000153959 | pdcl              | -0.115849049 | -0.178115822 | -0.269080801 | -0.124407546 |
| ENSDART00000153968 | apba2a            | -0.094717367 | 0.193224107  | 0.542818077  | 0.184287162  |
| ENSDART00000153990 | CR848791.2        | 3.062868799  | 2.217074852  | 2.048805323  | 1.916392428  |
| ENSDART00000153992 | AL844141.1        | 0.512134791  | 0.207788846  | -0.514504406 | -0.130928693 |
| ENSDART00000154039 | cntnap2a          | -0.318660467 | -0.524836596 | -0.23230439  | 0.054653452  |
| ENSDART00000154045 | glg1a             | 0.211468857  | 0.293330382  | 0.40088818   | 0.351496464  |
| ENSDART00000154066 | isg20             | 0.340483696  | 0.28200181   | 0.116846361  | -0.121466791 |
| ENSDART00000154077 | arhgap29a         | -0.13604217  | -0.133932896 | -0.339961978 | -0.305768852 |
| ENSDART00000154085 | gipr              | -0.077819916 | -0.236822644 | -0.445528895 | -0.377678023 |
| ENSDART00000154109 | tp53inp2          | 0.254956915  | 0.876540848  | 0.694070175  | 0.684041374  |
| ENSDART00000154132 | nptx2a            | -0.534082272 | -0.549346998 | -0.399917367 | -0.21269489  |
| ENSDART00000154141 | BX649398.2        | 0.278828233  | 0.21540553   | -0.861481785 | -0.785329833 |
| ENSDART00000154148 | camk1a            | -0.513931344 | -0.665527159 | -0.499415187 | -0.020106333 |
| ENSDART00000154187 | fat3a             | -0.16861177  | -0.487078475 | -0.285722941 | -0.100061338 |
| ENSDART00000154212 | BX323824.1        | 0.386508588  | 0.636151192  | 0.398585293  | 0.423381311  |
| ENSDART00000154217 | tapbpl            | -0.790387635 | -1.110046917 | -0.234167162 | 0.243016032  |
| ENSDART00000154228 | sgip1a            | -0.210460002 | -0.370824353 | -0.364544583 | -0.177769156 |
| ENSDART00000154238 | AL928908.3        | -0.284715118 | -0.465774511 | -0.246230328 | -0.209644064 |
| ENSDART00000154253 | VAMP1 (1 of many) | -0.590038106 | -0.991557836 | -0.153916319 | 0.292977881  |
| ENSDART00000154256 | gabbr1a           | -0.701390177 | -1.072254559 | -0.049084095 | 0.380533583  |
| ENSDART00000154282 | CT737162.2        | 2.40869789   | 3.049681827  | 2.839672212  | 2.555397461  |
| ENSDART00000154295 | RPS17 (1 of many) | 0.397556507  | 0.446477566  | 0.193480989  | 0.136840294  |
| ENSDART00000154307 | hsp90aa1.2        | -0.273233427 | -0.388821318 | -0.732231951 | -0.738083556 |
| ENSDART00000154314 | prph              | 1.502464936  | 3.204214666  | 3.264208069  | 2.453842104  |
| ENSDART00000154316 | birc6-as2         | -0.437572334 | -0.469057905 | -0.275420253 | -0.034926922 |
| ENSDART00000154321 | BX908750.1        | 0.337703917  | 0.710327992  | 0.54373662   | 0.188876538  |
| ENSDART00000154324 | CR848791.3        | 3.13610848   | 2.257927159  | 1.961382093  | 1.531269093  |

|                    |                       |              |              |              |              |
|--------------------|-----------------------|--------------|--------------|--------------|--------------|
| ENSDART00000154329 | plppr3b               | -0.697577837 | -0.505300644 | -0.575363423 | -0.078498654 |
| ENSDART00000154333 | camkva                | -0.731914874 | -0.620456244 | -0.460647205 | -0.026116956 |
| ENSDART00000154359 | ppil1                 | 0.446724137  | 0.384000004  | 0.201188176  | -0.044104474 |
| ENSDART00000154363 | chst7                 | -0.08877204  | -0.106063572 | -0.492144158 | -0.182223467 |
| ENSDART00000154375 | CR812464.1            | -0.471069407 | -0.288977412 | -0.485957331 | -0.299311124 |
| ENSDART00000154377 | HIST1H2BM (1 of many) | 0.871205458  | 1.144896653  | 0.89956001   | 0.544514919  |
| ENSDART00000154385 | nhs1a                 | -0.136848286 | -0.0387183   | -0.42116689  | -0.266423729 |
| ENSDART00000154393 | helz2                 | -0.348999688 | -0.710690348 | 2.383802665  | -0.188541475 |
| ENSDART00000154400 | tmem121a              | -0.218470186 | -0.361690646 | -0.304266051 | -0.077189842 |
| ENSDART00000154405 | rac1b                 | 0.253264939  | 0.144566871  | 0.063714363  | 0.127687084  |
| ENSDART00000154418 | relb                  | -0.043359819 | 0.083083005  | 0.26390054   | -0.071618881 |
| ENSDART00000154429 | gnai2b                | -0.171950228 | -0.218087414 | 0.308490155  | 0.376283024  |
| ENSDART00000154434 | frmd4ba               | 0.373950657  | 0.549595304  | 0.324851185  | -0.019839546 |
| ENSDART00000154437 | dyrk1ab               | -0.405599591 | -0.293606249 | -0.153631672 | -0.200586701 |
| ENSDART00000154438 | ltb4r                 | 0.406290343  | 0.081638761  | 0.101793584  | -0.225121243 |
| ENSDART00000154460 | FP243382.1            | 2.715231463  | 2.420271029  | 2.173535574  | 1.735635064  |
| ENSDART00000154495 | si:ch73-195i19.3      | 0.285619034  | 0.153921873  | 0.078118908  | 0.066673852  |
| ENSDART00000154501 | cntnap1               | -0.715173489 | -0.84270145  | -0.359147123 | 0.122603648  |
| ENSDART00000154503 | syncrpl               | 0.163572635  | 0.201195284  | 0.244411469  | 0.118655043  |
| ENSDART00000154519 | nrxn3a                | -0.161675514 | -0.445079711 | -0.329497924 | -0.050382407 |
| ENSDART00000154539 | slc17a7b              | -0.194590302 | -0.417792811 | -0.270877884 | 0.095165091  |
| ENSDART00000154543 | prelid3a              | 0.578261204  | 0.829307037  | 0.712329147  | 0.291766611  |
| ENSDART00000154573 | prob1                 | 1.935993422  | 2.091368151  | 1.752154811  | 1.442205958  |
| ENSDART00000154627 | eogt                  | -0.136366673 | -0.382886458 | -0.560103122 | -0.203176718 |
| ENSDART00000154628 | fam101b               | 0.450957894  | 0.982590486  | 0.845377619  | -0.490650185 |
| ENSDART00000154633 | chst15                | -0.234696766 | -0.27064598  | -0.214752082 | -0.155581795 |
| ENSDART00000154638 | kif26ab               | 2.382609513  | 1.668373417  | 1.704066313  | 1.906262158  |
| ENSDART00000154652 | irgq1                 | 0.050480218  | 0.069496236  | 1.163101864  | 0.075649547  |
| ENSDART00000154667 | SORCS3                | -0.864119649 | -0.84034251  | -0.370097899 | 0.056888282  |
| ENSDART00000154679 | ypel2b                | -0.575722509 | -0.671947843 | -0.397167717 | -0.03983803  |
| ENSDART00000154682 | CR847531.1            | -0.541034447 | -0.676553431 | -0.554824044 | -0.149530967 |
| ENSDART00000154719 | hip1                  | 0.155954348  | 0.357624902  | 0.536540352  | 0.421858349  |
| ENSDART00000154726 | MYADM (1 of many)     | 1.393641215  | 1.121324137  | 1.000193747  | 0.38217935   |
| ENSDART00000154730 | tsc22d1               | 0.125146937  | 0.071380598  | 0.346511952  | 0.250641998  |
| ENSDART00000154732 | ptprt                 | -0.128635692 | -0.441586772 | -0.224155866 | -0.045463061 |
| ENSDART00000154748 | sv2bb                 | -0.593359268 | -0.537099772 | -0.285465428 | 0.087161334  |
| ENSDART00000154754 | grik1b                | -0.541985174 | -0.220416154 | -0.114773141 | -0.128231092 |
| ENSDART00000154760 | CU302436.3            | -0.931829111 | -0.859047685 | -0.631190961 | -0.184130931 |
| ENSDART00000154778 | map1ab                | -0.607759134 | -0.711103734 | -0.339973576 | -0.303457691 |
| ENSDART00000154783 | BX511311.5            | -0.420893047 | -0.406058694 | -0.342057398 | -0.24848029  |
| ENSDART00000154801 | itgae.2               | 0.922252153  | 0.655667188  | 0.379341087  | -0.144710616 |
| ENSDART00000154809 | CU467861.1            | 0.653813027  | 0.40784225   | 0.192026805  | 0.151191997  |
| ENSDART00000154811 | shank1                | -0.390024258 | -0.720748027 | -0.113172669 | 0.256359072  |
| ENSDART00000154846 | CR381618.1            | 0.115176903  | 0.900181702  | 1.102625706  | 0.253393379  |
| ENSDART00000154851 | zgc:153405            | 0.317950752  | 1.076463864  | 0.674378682  | 0.394781222  |
| ENSDART00000154860 | CU682780.1            | -0.134139035 | -0.255412373 | -0.351732915 | -0.064350576 |
| ENSDART00000154869 | cacna1ha              | -0.561980799 | -0.554587419 | -0.200655166 | 0.115415453  |
| ENSDART00000154880 | arhgef33              | 0.636994605  | 0.687196577  | 0.646579762  | 0.300121216  |
| ENSDART00000154885 | si:ch211-167j9.4      | 1.022951831  | 0.721088624  | 0.864353518  | 0.647190994  |
| ENSDART00000154897 | srsf10a               | -0.118782385 | -0.22214156  | -0.484269556 | -0.079154163 |
| ENSDART00000154916 | p4htm                 | -0.322717782 | -0.242652877 | -0.246255125 | -0.141036056 |



|                    |                   |              |              |              |              |
|--------------------|-------------------|--------------|--------------|--------------|--------------|
| ENSDART00000154917 | ciartb            | -0.07665894  | -0.17887759  | -0.516654864 | -0.219843882 |
| ENSDART00000154933 | si:dkey-13p1.4    | -2.565488296 | -3.472379023 | -0.405040918 | 0.505631615  |
| ENSDART00000154945 | si:dkey-7j14.6    | 0.563979024  | 0.172625977  | 0.010511104  | -0.696238166 |
| ENSDART00000154961 | btbd10b           | -0.035347687 | 0.05017631   | 0.315377826  | 0.177817418  |
| ENSDART00000154978 | si:ch211-284f22.3 | 0.111486547  | 0.17394927   | 0.442535968  | 0.352663532  |
| ENSDART00000154985 | ddx3b             | -0.099315614 | -0.086363684 | 0.465639279  | 0.388612698  |
| ENSDART00000154991 | b4galnt1b         | -0.249570746 | -0.126095261 | 0.190575038  | 0.316262718  |
| ENSDART00000155033 | srpk2             | -0.213188431 | 0.160547857  | 0.269227711  | 0.471530406  |
| ENSDART00000155038 | si:dkeyp-100a5.4  | -0.19105809  | -0.704501455 | -0.315530312 | -0.360932845 |
| ENSDART00000155051 | mych              | 1.81452306   | 1.847457308  | 1.423042212  | 0.692601562  |
| ENSDART00000155057 | capns1b           | 0.743122931  | 1.233401578  | 0.848245138  | 0.67484109   |
| ENSDART00000155066 | atf5b             | 0.303223783  | 0.449779577  | 0.245269838  | -0.118029433 |
| ENSDART00000155078 | CU466278.1        | -0.496260032 | -0.275828398 | -0.937323619 | -0.494833793 |
| ENSDART00000155088 | ankrd33ab         | -0.091123111 | -0.280595773 | -2.122583018 | -0.908625438 |
| ENSDART00000155094 | si:ch211-286c4.6  | 0.931010056  | 1.14507062   | 1.165043802  | 1.805632584  |
| ENSDART00000155108 | si:ch211-153l6.6  | -0.396073461 | -0.324628235 | -0.330118035 | -0.333690214 |
| ENSDART00000155116 | im:7152348        | -0.17038115  | -0.180140684 | -0.567414199 | -0.647722466 |
| ENSDART00000155128 | meis3             | 1.719560674  | 1.869294835  | 2.789896441  | 2.118152659  |
| ENSDART00000155178 | man1b1b           | -0.197923135 | -0.298790741 | -0.488552512 | -0.408314648 |
| ENSDART00000155184 | lcorl             | -0.199231763 | -0.444480785 | -0.032192793 | -0.024389475 |
| ENSDART00000155188 | ccnjl             | 0.284030133  | 0.391162848  | 0.492680219  | 0.242842213  |
| ENSDART00000155190 | maptb             | 1.096239137  | 1.804532446  | 2.232737802  | 1.717568221  |
| ENSDART00000155203 | ttbk1b            | -0.886183357 | -0.409260354 | 0.093887166  | 0.234308172  |
| ENSDART00000155212 | msi2b             | -0.193481816 | -0.280091063 | -0.40298969  | -0.141186615 |
| ENSDART00000155227 | si:dkey-248g15.2  | -0.512231666 | -0.490597761 | -0.50523481  | -0.410257249 |
| ENSDART00000155229 | rxfp3.3b          | -0.899836922 | -0.961252446 | -0.631060044 | -0.38629797  |
| ENSDART00000155243 | BX571762.2        | -0.58394173  | -0.66558831  | -0.494788274 | -0.139509269 |
| ENSDART00000155256 | VWA5A (1 of many) | 0.207030506  | 0.487713239  | 0.641785484  | 0.122484219  |
| ENSDART00000155262 | nek1              | -0.289218155 | -0.162294169 | 0.032473831  | 0.21974529   |
| ENSDART00000155267 | si:ch211-149e23.4 | 0.305598533  | 0.378888393  | 0.64366915   | 0.422691793  |
| ENSDART00000155268 | pik3cb            | 0.672881324  | 0.55380807   | 0.246761254  | 0.040522215  |
| ENSDART00000155273 | FP102016.1        | 0.672121642  | 0.238521805  | 0.194526989  | 0.041260629  |
| ENSDART00000155280 | GDPGP1            | 0.576074599  | 0.656458452  | 0.674683139  | 0.299654628  |
| ENSDART00000155306 | CR925728.1        | 1.81197689   | 3.280738703  | 3.024711765  | 2.003163607  |
| ENSDART00000155313 | hspa4l            | -0.318813042 | -0.280574999 | -0.269018374 | 0.033454147  |
| ENSDART00000155320 | atxn7l1           | -0.301256075 | -0.435278991 | -0.214418032 | -0.09758885  |
| ENSDART00000155324 | pdpk1a            | -0.082713691 | -0.135052421 | -0.317218269 | -0.180842854 |
| ENSDART00000155327 | ip6k2b            | 0.635904907  | 0.734729077  | 0.476402387  | 0.497162385  |
| ENSDART00000155344 | VWA5A (1 of many) | 0.009320645  | 0.148549206  | 0.649252702  | 0.190646512  |
| ENSDART00000155346 | tbc1d24           | -0.444989153 | -0.328605075 | -0.340554332 | -0.035933185 |
| ENSDART00000155368 | si:ch73-95l15.3   | 1.516126674  | 2.634881995  | 2.849448463  | 2.215584039  |
| ENSDART00000155397 | soat2             | -0.618559497 | -0.31486995  | -0.194806138 | -0.125519338 |
| ENSDART00000155427 | reep6             | 0.890805905  | 0.284631883  | 0.369468446  | 0.541597773  |
| ENSDART00000155440 | eif3ba            | 0.265595321  | 0.439061322  | 0.461693724  | 0.229141991  |
| ENSDART00000155445 | si:dkey-7j14.6    | 4.555762034  | 3.357060696  | 4.122496376  | 1.366436667  |
| ENSDART00000155456 | gria4a            | -0.214950555 | -0.367205609 | -0.037830298 | 0.237179158  |
| ENSDART00000155458 | ubap1la           | -0.102679722 | -0.709773263 | -0.512828077 | -0.333708251 |
| ENSDART00000155464 | ftr73             | 0.436406361  | 0.364310996  | 2.049125852  | 0.40110848   |
| ENSDART00000155472 | nudt8             | -0.430833003 | -0.309991274 | -0.295400218 | -0.125942696 |
| ENSDART00000155480 | ptprnb            | -0.501074747 | -0.734898939 | -0.55867421  | -0.198202123 |
| ENSDART00000155494 | CR384099.1        | -0.702495416 | -0.755760921 | -0.229440848 | 0.245420937  |

|                    |                   |              |              |              |              |
|--------------------|-------------------|--------------|--------------|--------------|--------------|
| ENSDART00000155496 | gal3st2           | -0.347287801 | -0.358994611 | -0.502209455 | 0.011977936  |
| ENSDART00000155499 | CU571319.1        | 0.914674175  | 1.459254054  | 0.740447631  | 0.310619615  |
| ENSDART00000155502 | sez6b             | -0.382545228 | -0.653854879 | -0.149982953 | 0.168281376  |
| ENSDART00000155519 | si:ch211-139d20.3 | 0.778333948  | 0.572606648  | 0.403486279  | 0.486914049  |
| ENSDART00000155525 | si:rp71-45k5.4    | 0.233215264  | 0.362150294  | 0.25819678   | 0.006995576  |
| ENSDART00000155537 | VWA5A (1 of many) | 1.206080865  | 0.987004598  | 1.27402251   | 0.722325665  |
| ENSDART00000155539 | CR786577.1        | -0.296712547 | -0.710798753 | -0.341045728 | 0.032686751  |
| ENSDART00000155553 | CR931780.1        | 1.845884645  | 1.39773807   | 0.761518659  | 0.588325484  |
| ENSDART00000155554 | frs3              | -0.288569277 | -0.348098053 | 0.092392931  | 0.139305366  |
| ENSDART00000155563 | abca5             | -0.240041791 | -0.35443471  | -0.098648169 | 0.068480985  |
| ENSDART00000155580 | ccdc32            | -0.137851793 | -0.182759184 | -0.331717766 | -0.143672128 |
| ENSDART00000155592 | pcdh17            | -0.283490769 | -0.422406754 | -0.268768577 | 0.186259856  |
| ENSDART00000155595 | zgc:174263        | -0.246339018 | -0.142647436 | -0.250696029 | -0.144411513 |
| ENSDART00000155610 | tdg.2             | 0.198987795  | 0.279928785  | 0.39077816   | 0.364649362  |
| ENSDART00000155658 | rapgef1           | -0.418362292 | -0.397338899 | 0.000660896  | -0.001869225 |
| ENSDART00000155666 | znf576.1          | -0.372721752 | -0.23410815  | -0.134923201 | -0.013577883 |
| ENSDART00000155683 | CU855758.2        | -0.197771803 | -0.264936874 | -0.616643588 | -0.19367265  |
| ENSDART00000155723 | si:ch211-24o10.6  | -0.255651916 | 0.580162906  | 3.993132482  | 0.654326546  |
| ENSDART00000155751 | nuak1b            | 0.785416985  | 1.722603254  | 1.683891996  | 1.302083807  |
| ENSDART00000155755 | CU469362.1        | 0.467928162  | 0.778645014  | 0.342312822  | -0.038725012 |
| ENSDART00000155757 | si:dkey-16p21.8   | -0.383053569 | -0.315569666 | -0.222717784 | 0.028079211  |
| ENSDART00000155764 | slc25a18          | -0.081957182 | -0.293577862 | -0.279616954 | -0.236786045 |
| ENSDART00000155786 | adgr1a            | -0.190147203 | -0.479741899 | -0.292479007 | 0.056973675  |
| ENSDART00000155808 | SRMS              | -0.518504687 | -0.21831974  | 0.182924623  | 0.347888554  |
| ENSDART00000155817 | spsb3b            | 0.397854128  | -0.261249457 | 0.795238945  | 1.076488289  |
| ENSDART00000155821 | kcnt2             | -1.064051569 | -1.353278896 | -1.209879321 | -0.444718597 |
| ENSDART00000155838 | luzp1             | -0.38633981  | -0.211709262 | -0.146984907 | -0.314685818 |
| ENSDART00000155839 | CR759918.1        | -0.263859971 | -0.262088445 | -0.379170984 | -0.118091172 |
| ENSDART00000155840 | nyap2a            | -0.526663005 | -0.654892136 | 0.27374848   | 0.170536216  |
| ENSDART00000155843 | cntnap2a          | -0.263075507 | -0.343897302 | 0.676718804  | 0.99202798   |
| ENSDART00000155844 | nr1d4b            | 0.850133899  | 0.016728696  | -0.171313869 | 0.165802614  |
| ENSDART00000155848 | CU929046.2        | -0.462340311 | -0.419607593 | -0.082173547 | -0.018364502 |
| ENSDART00000155853 | gprc5ba           | -0.568480744 | -0.680176078 | -0.476445621 | -0.089942946 |
| ENSDART00000155859 | larp4ab           | -0.193577441 | -0.330790279 | -0.534105504 | -0.201385609 |
| ENSDART00000155864 | CU929070.1        | 1.274116455  | 1.096698631  | 0.870265354  | 0.298589514  |
| ENSDART00000155865 | tmtops2a          | -0.317973372 | -0.37404155  | -0.204729003 | -0.178609254 |
| ENSDART00000155866 | zbtb16b           | -0.434457287 | -0.595844526 | 0.044569606  | 0.015262284  |
| ENSDART00000155902 | frya              | -0.208619052 | -0.429125005 | -0.269458135 | -0.004719121 |
| ENSDART00000155935 | clstn3            | -0.324952015 | -0.256429293 | 0.203826088  | 0.321978764  |
| ENSDART00000155947 |                   | -0.00158363  | 0.212586024  | 0.278540905  | 0.169021899  |
| ENSDART00000155949 | grm8b             | -0.426657348 | -0.505637682 | -0.163630603 | 0.069819734  |
| ENSDART00000155956 | ssx2ipa           | -0.036908945 | -0.252732501 | -0.388773092 | -0.156731785 |
| ENSDART00000155973 | si:ch211-282b22.1 | 0.150167669  | -0.093228424 | -0.31353999  | -0.332567216 |
| ENSDART00000155992 | tjp1b             | -0.305505503 | -0.430213518 | -0.153805225 | 0.023043416  |
| ENSDART00000156002 | tmem206           | 0.793441462  | 0.286165316  | 0.167291274  | -0.130249565 |
| ENSDART00000156008 | adcy1b            | -0.126277791 | -0.148680925 | -0.963041725 | -0.495906031 |
| ENSDART00000156012 | si:dkey-35i13.1   | -1.182557557 | -0.949918392 | -0.338171836 | -0.056213778 |
| ENSDART00000156019 | phlpp1            | -0.378155747 | -0.257656641 | -0.150573304 | -0.126584813 |
| ENSDART00000156034 | VWA5A (1 of many) | 1.04711946   | 1.090403168  | 1.260861512  | 0.694741705  |
| ENSDART00000156038 | epn2              | 0.165862475  | 0.434471463  | 0.333526121  | 0.113707323  |
| ENSDART00000156051 | dhx32b            | -0.034036848 | -0.386771049 | -0.600165189 | -0.131769991 |

|                    |                   |              |              |              |              |
|--------------------|-------------------|--------------|--------------|--------------|--------------|
| ENSDART00000156062 | calml4b           | -0.12658352  | -0.200610116 | -0.571249563 | -0.361192591 |
| ENSDART00000156167 | si:ch73-182a11.2  | 0.438099394  | 0.613388756  | 0.677790276  | 0.474745988  |
| ENSDART00000156169 | ube2o             | -0.089939623 | -0.17956897  | -0.346977584 | -0.218736801 |
| ENSDART00000156179 | sema7a            | -0.273960356 | -0.559537035 | -0.479585038 | -0.478067901 |
| ENSDART00000156211 | adcyp1r1b         | -0.120918148 | -0.186017    | -0.540439336 | -0.277725276 |
| ENSDART00000156224 | dhx33             | 0.472474316  | 0.556602191  | 0.639276654  | 0.492917502  |
| ENSDART00000156247 | CU468915.1        | -0.147323171 | -0.162953088 | -0.662599642 | -0.420048082 |
| ENSDART00000156251 | ehbp1             | 0.342339175  | 0.353753636  | 0.38894242   | 0.04618254   |
| ENSDART00000156255 | ago1              | 0.402935641  | 0.576022371  | 0.656640241  | 0.478601065  |
| ENSDART00000156256 | angpt4            | -0.447666401 | -0.531623063 | -0.584960614 | -0.899124282 |
| ENSDART00000156257 | wnk1a             | -0.012583832 | 0.164942132  | 0.328941429  | 0.287930853  |
| ENSDART00000156258 | pfkpb             | -0.354296164 | -0.444812712 | -0.357490287 | -0.175370256 |
| ENSDART00000156280 | si:ch211-195b15.7 | -0.343611395 | -0.333351498 | -0.20091334  | -0.160599804 |
| ENSDART00000156295 | myhb              | -2.03199835  | 4.211906798  | 4.339398917  | 2.940685436  |
| ENSDART00000156306 | ptgir             | 0.787352004  | 0.130407388  | 0.033259328  | -0.478389399 |
| ENSDART00000156340 | si:ch211-167b20.8 | -0.291865267 | -0.289158159 | -0.304691219 | -0.111151074 |
| ENSDART00000156341 | fam117ba          | -0.500099563 | -0.265235629 | 0.202099115  | 0.368226992  |
| ENSDART00000156351 | zfat              | -0.386268069 | -0.362611932 | -0.387180541 | -0.301395116 |
| ENSDART00000156365 | BX248121.1        | -0.069755444 | -0.2828198   | -0.35442143  | -0.173325265 |
| ENSDART00000156375 | kcnq2b            | -0.284091354 | -0.197722227 | 0.27148365   | 0.512045099  |
| ENSDART00000156380 | CR848757.1        | -0.431298815 | -0.377014166 | 0.404962464  | 0.865655337  |
| ENSDART00000156393 | AL772314.1        | -0.272422966 | -0.157258449 | 0.218420805  | 0.368190657  |
| ENSDART00000156403 | gfpt1             | 0.402370916  | 0.732684838  | 0.696897001  | 0.375214811  |
| ENSDART00000156411 | fam98a            | 0.369288002  | 0.399859986  | 0.477248543  | 0.233728964  |
| ENSDART00000156415 | dock9b            | 0.187525252  | 0.556466903  | 0.665071238  | 0.341730571  |
| ENSDART00000156418 | itpk1b            | -0.567310725 | -0.6808899   | -0.20043499  | -0.215676742 |
| ENSDART00000156428 | heph1a            | 0.427057323  | 0.215282086  | 0.277986668  | -0.033310258 |
| ENSDART00000156437 | BX248501.1        | -0.044614101 | -0.492506227 | -0.236687215 | -0.012438349 |
| ENSDART00000156438 | tmem138           | -0.131418974 | -0.291816206 | -0.603920899 | -0.471900931 |
| ENSDART00000156447 | ap2a1             | -0.168026562 | -0.400633541 | -0.149036642 | -0.01932092  |
| ENSDART00000156450 | wnk4b             | 0.377998578  | 0.587708612  | 1.132797895  | 0.554283794  |
| ENSDART00000156473 | CR627483.1        | -0.446874417 | -0.944979531 | -0.551426346 | -0.288797786 |
| ENSDART00000156492 | tiam2a            | -0.024981814 | -0.236489206 | -0.397107093 | -0.120407246 |
| ENSDART00000156499 | prkcdb            | 0.617876805  | 0.366145269  | 0.057590279  | -0.230105501 |
| ENSDART00000156509 | fam150bb          | -0.200699582 | -0.03489316  | -0.310837396 | -0.503245808 |
| ENSDART00000156516 | tmem74b           | -0.490393884 | -0.38109679  | -0.101020414 | 0.194211555  |
| ENSDART00000156517 | GSE1              | -0.323310165 | -0.383945273 | -0.036135566 | -0.046797605 |
| ENSDART00000156527 | crhr1             | -0.121975919 | -0.246139891 | -0.376184792 | -0.120567191 |
| ENSDART00000156535 | vav3b             | -0.155549402 | 0.298871549  | 0.871724785  | 0.959064908  |
| ENSDART00000156546 | plcxd1            | 0.33889602   | 0.161133476  | 0.572020307  | 0.368311625  |
| ENSDART00000156568 | CR387996.1        | -0.565799723 | -0.534585499 | -0.855400153 | -0.72349809  |
| ENSDART00000156570 | slc6a17           | -0.448593137 | -0.394227085 | -0.032159276 | 0.074756396  |
| ENSDART00000156574 | si:ch211-270g19.5 | -0.160521866 | -0.305818991 | -0.352315858 | -0.223463705 |
| ENSDART00000156575 | dicp3.3           | 1.874714519  | 0.882148407  | 0.706359774  | -0.079481712 |
| ENSDART00000156577 | si:ch211-130m23.5 | -0.007378589 | 0.400588111  | 0.725075783  | 0.606240178  |
| ENSDART00000156580 | hspa12a           | -0.664613601 | -0.584311718 | 0.126225265  | 0.380065995  |
| ENSDART00000156584 | msi2b             | -0.183156983 | -0.402159154 | -0.705145609 | -0.389308076 |
| ENSDART00000156607 | CT737162.1        | 0.778225783  | 0.597499699  | 0.53495134   | 0.647915122  |
| ENSDART00000156608 | ap2a1             | -0.16265507  | -0.313644183 | -0.332880329 | -0.023511806 |
| ENSDART00000156613 | CR848683.1        | -0.419259508 | -0.300093589 | -0.534359803 | -0.243066507 |
| ENSDART00000156615 | amigo3            | -0.174881747 | -0.348495554 | -0.328942663 | 0.002458748  |

|                    |                       |              |              |              |              |
|--------------------|-----------------------|--------------|--------------|--------------|--------------|
| ENSDART00000156668 | BX569793.1            | -0.298302127 | -0.566890135 | -0.349641739 | -0.271668844 |
| ENSDART00000156690 | ftr88                 | 0.478641753  | 0.356185618  | 1.950902073  | 0.248066147  |
| ENSDART00000156705 | si:dkeyp-72g9.4       | -0.743143803 | -0.697928004 | -0.454613917 | -0.077239927 |
| ENSDART00000156741 | BX663503.2            | -0.41351136  | -0.477289266 | -0.358517546 | -0.050787842 |
| ENSDART00000156757 | CU633486.1            | -0.302968456 | -0.206059    | -0.531920994 | -0.165463059 |
| ENSDART00000156760 | grik4                 | -0.347451056 | -0.634709172 | -0.373537369 | -0.211041818 |
| ENSDART00000156765 | soga3a                | 0.515035881  | 0.806381678  | 1.137120698  | 0.812578505  |
| ENSDART00000156774 | dph6                  | 0.485952337  | 0.860504803  | 0.608054536  | 0.313680056  |
| ENSDART00000156792 | kif1aa                | -0.016449727 | 0.304055121  | 0.524314954  | 0.462526752  |
| ENSDART00000156795 | zcchc8                | 0.52372258   | 0.428501893  | 0.558201403  | 0.582679631  |
| ENSDART00000156806 | rps6kl1               | 0.03495508   | 0.325476415  | 0.37135553   | 0.249571068  |
| ENSDART00000156820 | si:dkey-7j14.5        | -0.971869146 | -0.757334904 | 0.08249331   | 0.800607437  |
| ENSDART00000156822 | cdip1                 | -0.168452851 | -0.279910749 | -0.292336463 | -0.062208262 |
| ENSDART00000156831 | si:dkeyp-47f9.4       | -0.215799622 | -0.290204625 | -0.428110244 | -0.249285093 |
| ENSDART00000156832 | kif13ba               | 0.259733256  | 0.195728022  | 0.255457371  | 0.044129384  |
| ENSDART00000156853 | si:ch211-284e13.14    | 0.249769449  | 0.06508988   | 0.403860054  | 0.279589235  |
| ENSDART00000156864 | CR376745.2            | -0.465037351 | -0.777375633 | -0.748299595 | -0.606506499 |
| ENSDART00000156877 | prss56                | -1.154037343 | -0.806544973 | -0.688753663 | -0.465249106 |
| ENSDART00000156885 | EML5                  | -0.115526296 | -0.315705485 | -0.106202597 | 0.094534493  |
| ENSDART00000156913 | BX927184.1            | 1.282107066  | 1.77927465   | 1.802027966  | 1.376990986  |
| ENSDART00000156918 | si:dkey-16p21.8       | -0.278111877 | -0.271868386 | -0.501824009 | -0.172182623 |
| ENSDART00000156923 | plekhd1               | -0.640317774 | -0.396125765 | -0.428766409 | -0.43244988  |
| ENSDART00000156928 | nrxn3a                | 0.020925857  | -0.341808434 | -0.239366202 | 0.052782357  |
| ENSDART00000156935 | pbx4                  | 0.960146191  | 0.964981474  | 3.716226941  | 3.606625876  |
| ENSDART00000156965 | osbp15                | -0.452639629 | -0.228065482 | 0.296781507  | 0.346469129  |
| ENSDART00000156967 | itcha                 | -0.048958922 | -0.233534262 | -0.334119802 | -0.057332431 |
| ENSDART00000156970 | si:ch73-265h17.5      | 1.250341969  | 1.481314496  | 1.76830523   | 0.8438116    |
| ENSDART00000156972 | slc12a7a              | 0.533547881  | 0.750475895  | 0.543271513  | 0.05077876   |
| ENSDART00000156982 | si:ch211-195b15.8     | -0.203622983 | -0.158924419 | -0.050797883 | 0.351311882  |
| ENSDART00000156995 | sorl1                 | -0.129978292 | -0.268802979 | -0.097227509 | 0.102143372  |
| ENSDART00000157018 | stmn3                 | -1.008205118 | -1.406964646 | -0.116902659 | 0.621837811  |
| ENSDART00000157043 | rtn4r                 | -0.358605066 | -0.3593825   | -0.41712234  | -0.136427457 |
| ENSDART00000157045 | CU861453.1            | -0.184297698 | -0.238197074 | -0.240198755 | -0.095792528 |
| ENSDART00000157050 | thoc5                 | -3.378273157 | -0.016679798 | 0.227931101  | 0.074505779  |
| ENSDART00000157058 | si:dkey-276j7.1       | -0.114061291 | 0.35744712   | 0.794710779  | 0.605587625  |
| ENSDART00000157066 | ppp1r16b              | -0.047627869 | -0.115324195 | -0.408403631 | -0.014573035 |
| ENSDART00000157067 | BX510324.1            | -0.110028536 | -3.040813753 | -0.681076994 | -0.348601244 |
| ENSDART00000157116 | cyp8b3                | -4.272126467 | -1.470280769 | 0.08019487   | -1.373424813 |
| ENSDART00000157122 | elmsan1b              | 0.072375655  | 0.138875939  | -0.375191445 | -0.292342976 |
| ENSDART00000157124 | CT033825.1            | -0.560424235 | -0.809708864 | -0.680777647 | -0.144372819 |
| ENSDART00000157125 | vsnl1b                | -0.832964446 | -0.803942924 | -0.29707501  | 0.109485311  |
| ENSDART00000157127 | lmcd1                 | 1.160892936  | 2.271204052  | 2.063825472  | 1.282095985  |
| ENSDART00000157129 | slc12a5a              | -0.482400538 | -0.74419089  | -0.401518291 | -0.07447909  |
| ENSDART00000157137 | HIST1H2BM (1 of many) | 0.980872833  | 1.453339934  | 1.015669985  | 0.930663607  |
| ENSDART00000157139 | tmbim1a               | 0.963253296  | 1.499596205  | 1.306783479  | 0.549513539  |
| ENSDART00000157171 | si:ch211-168d23.3     | -0.276296251 | -0.552181073 | -0.115547916 | -0.061680907 |
| ENSDART00000157190 | ostn                  | 0.371505716  | 0.628806712  | 0.229636498  | 0.167623814  |
| ENSDART00000157195 | ncam2                 | -0.590792178 | -0.719154845 | -0.40764277  | 0.002619526  |
| ENSDART00000157199 | mkl2b                 | 0.238133435  | 0.28120222   | 0.324920076  | 0.149313819  |
| ENSDART00000157237 | si:dkey-56f14.7       | -0.377561364 | -0.203140811 | -0.202521092 | -0.065412084 |
| ENSDART00000157258 | BX004991.1            | -0.288834986 | -0.59132286  | -0.471054454 | -0.432666578 |

|                    |                     |              |              |              |              |
|--------------------|---------------------|--------------|--------------|--------------|--------------|
| ENSDART00000157264 | RAP1GAP (1 of many) | -0.397821605 | -0.344805586 | -0.195900343 | -0.114570879 |
| ENSDART00000157265 | trim13              | -0.831738752 | -0.32341984  | -0.102064486 | -0.071474505 |
| ENSDART00000157302 | si:dkey-7j14.5      | -0.795010515 | -0.583416344 | 0.327377123  | 0.951280694  |
| ENSDART00000157330 | necab3              | -0.311593638 | -0.396628677 | -0.274835563 | -0.023399638 |
| ENSDART00000157338 | gstz1               | -0.391223456 | -0.14748942  | -0.590184545 | -0.319150237 |
| ENSDART00000157350 | CT573344.1          | 0.592860846  | 1.013860007  | 1.275401288  | 0.850112465  |
| ENSDART00000157378 | hdac5               | -0.360172826 | -0.414916304 | -0.488703112 | -0.152605137 |
| ENSDART00000157407 | nacad               | -0.349281215 | 0.532726398  | 0.824860187  | 0.457523633  |
| ENSDART00000157414 | plxna4              | -0.256858488 | -0.391015088 | -0.285048615 | -0.106219383 |
| ENSDART00000157415 | acvr2ab             | -0.152487638 | -0.319222405 | -0.146638904 | -0.027512421 |
| ENSDART00000157416 | si:dkey-23n7.10     | 0.164308792  | 0.543803953  | 1.528490128  | 1.278412625  |
| ENSDART00000157428 | pik3r3b             | -0.522784766 | -0.44851499  | -0.152608244 | 0.028231585  |
| ENSDART00000157437 | park2               | -0.135617767 | -0.306295495 | -0.445890787 | -0.195890902 |
| ENSDART00000157441 | filip1l             | 1.025025125  | 2.361056221  | 1.959563135  | 1.214723721  |
| ENSDART00000157449 | clstn2              | -0.339354151 | -0.60478304  | 0.06475081   | 0.303731917  |
| ENSDART00000157454 | ncam1a              | -0.363879899 | -0.114400367 | 0.050687773  | 0.064981174  |
| ENSDART00000157464 | adkb                | 0.004906369  | 0.081747651  | 0.332869381  | 0.17633498   |
| ENSDART00000157475 | coro7               | 0.174942149  | 0.053392758  | 0.483358888  | 0.70362148   |
| ENSDART00000157479 | nr4a1               | -1.499367308 | -4.285014891 | -2.179617587 | -2.01791928  |
| ENSDART00000157487 | tfec                | 0.534318298  | 0.423012313  | 0.205933849  | -0.313187686 |
| ENSDART00000157515 | FO704641.1          | -0.135830256 | -0.41280018  | -0.451790561 | -0.015210245 |
| ENSDART00000157518 | hspa12a             | -0.767789618 | -0.701014156 | 0.093464144  | 0.364648116  |
| ENSDART00000157535 | unc13c              | -0.230182256 | -0.566319347 | -0.291866986 | -0.102048139 |
| ENSDART00000157538 | npm3                | 0.706470742  | 0.616423608  | 0.411598819  | -0.103962898 |
| ENSDART00000157546 |                     | -4.297830881 | -2.011048515 | -0.106888147 | -0.169461052 |
| ENSDART00000157559 | si:dkey-183n20.15   | 2.324560868  | 2.818869593  | 3.029863009  | 3.039600704  |
| ENSDART00000157563 | noctb               | -0.197344301 | -0.486083216 | -0.268092319 | 0.128030661  |
| ENSDART00000157570 | asmt                | -0.467907647 | -0.512776687 | -0.801096178 | -0.257600065 |
| ENSDART00000157581 | dctn2               | 0.246810516  | 0.408963324  | 0.394068831  | 0.222953154  |
| ENSDART00000157591 | CT583642.1          | 0.946563077  | 0.733732925  | 0.580155557  | -0.143517637 |
| ENSDART00000157597 | Metazoa_SRP         | 3.784983496  | 4.068975573  | 4.489534416  | 3.689887905  |
| ENSDART00000157604 | si:dkey-19c16.12    | 0.518457933  | 0.406892634  | 0.690003002  | 0.445775315  |
| ENSDART00000157625 | mapkapk3            | 0.008165693  | -0.129188005 | -0.419061818 | -0.281468347 |
| ENSDART00000157636 | Metazoa_SRP         | 2.626880551  | 2.386640401  | 1.529298522  | 0.72995056   |
| ENSDART00000157643 | si:dkey-88e18.8     | 0.426205845  | 0.069942358  | 0.168991341  | 0.195596151  |
| ENSDART00000157659 | camta1b             | -0.574265168 | -0.690891494 | -0.316064045 | -0.339000781 |
| ENSDART00000157661 | pdlim5a             | -0.256112858 | -0.374018749 | -0.32171501  | -0.127659508 |
| ENSDART00000157663 | reln                | -0.012850615 | -0.065342924 | 0.75286937   | 0.74278543   |
| ENSDART00000157678 | nop53               | 0.221649254  | 0.357738319  | 0.319808875  | 0.087032288  |
| ENSDART00000157682 | kat2a               | 0.094563424  | 0.264392397  | 0.483214757  | 0.33498107   |
| ENSDART00000157697 | sec22bb             | -0.209339329 | -0.24617122  | -0.297558263 | -0.212223069 |
| ENSDART00000157711 | ap2m1b              | -0.212778909 | -0.504780227 | -0.48236783  | -0.089136332 |
| ENSDART00000157726 | fam20a              | 0.506263561  | 0.217850689  | -0.118035628 | -0.139373167 |
| ENSDART00000157728 | gdap1l1             | -0.078507744 | 0.185505427  | 0.335339207  | 0.32984222   |
| ENSDART00000157735 | cdc42ep4a           | 0.06354285   | 0.460607642  | 0.576300047  | 0.396817817  |
| ENSDART00000157755 | cds1                | -0.167833858 | -0.281185983 | -0.514312915 | -0.176231692 |
| ENSDART00000157769 | pcdh1gc5            | -0.403524411 | -0.226721593 | 0.040583925  | 0.029815654  |
| ENSDART00000157771 | sumo2b              | 0.072691072  | 0.240484774  | 0.205807834  | 0.084424554  |
| ENSDART00000157775 | CR381700.1          | 0.888966397  | 0.292933465  | 0.058270274  | 0.51311949   |
| ENSDART00000157788 | CABZ01031894.1      | -0.75935498  | -0.746140313 | -0.275189537 | -0.221209558 |
| ENSDART00000157815 | elmo1               | -0.27246831  | -0.132899842 | -0.049572106 | 0.087486375  |

|                    |                    |              |              |              |              |
|--------------------|--------------------|--------------|--------------|--------------|--------------|
| ENSDART00000157817 | lrrfip1b           | -0.412751624 | 0.086992217  | 0.168101768  | 0.241775802  |
| ENSDART00000157820 | mfsd6a             | 0.403998194  | 0.775291086  | 0.690391907  | -0.020489453 |
| ENSDART00000157824 | slc6a15            | 0.370043272  | 0.932121448  | 1.025205824  | 0.470213629  |
| ENSDART00000157826 | mpp1               | 0.283246867  | 0.228442011  | 0.159131554  | 0.043281733  |
| ENSDART00000157852 | crtac1b            | -0.401370563 | -0.59197436  | -0.358347223 | -0.176621049 |
| ENSDART00000157855 | ebf3a              | -0.765871102 | -0.436598509 | 0.580406091  | 0.942511549  |
| ENSDART00000157871 | mgst3a             | 0.496607086  | 0.574379254  | 0.622130807  | 0.504216816  |
| ENSDART00000157873 | hacd1              | 0.841608261  | 0.46729923   | 0.326975211  | 0.16703571   |
| ENSDART00000157877 | CABZ01092282.1     | -0.281901821 | -0.460522749 | 0.165109465  | 0.263636132  |
| ENSDART00000157890 | tcf7l1b            | -4.555123239 | -4.673271453 | -1.829433189 | -0.732249154 |
| ENSDART00000157894 | apaf1              | 0.69901776   | 0.613857472  | 0.804406673  | 0.575412751  |
| ENSDART00000157899 | dad1               | 0.443099375  | 0.390242441  | 0.192203328  | -0.014224626 |
| ENSDART00000157900 | chmp1b             | 0.92760321   | 0.512046614  | 0.591242771  | 0.272231533  |
| ENSDART00000157907 | rpl34              | 0.216382556  | 0.50724745   | 0.251806906  | 0.167915072  |
| ENSDART00000157919 | med24              | 0.290079054  | 0.266724064  | 0.247847379  | 0.11623123   |
| ENSDART00000157920 | BX664622.3         | 0.309964523  | 0.2387983    | 0.211520656  | 0.43648414   |
| ENSDART00000157937 | supt3h             | 0.425159053  | 0.217206475  | 0.313741902  | -0.075091294 |
| ENSDART00000157943 | TENM2              | -0.301363214 | -0.846881931 | -0.344978545 | 0.012452     |
| ENSDART00000157944 | CR848788.1         | 0.572199002  | 0.285271614  | 0.143233659  | 0.192859067  |
| ENSDART00000157958 | nav3               | 0.289857115  | 0.341415382  | 0.725222646  | 0.845169813  |
| ENSDART00000157976 | hif1a2             | 0.549135047  | 0.585055165  | 1.624530088  | 0.686809008  |
| ENSDART00000157979 | plppr5b            | -0.141986763 | -0.474240998 | -0.437275413 | -0.217953336 |
| ENSDART00000157998 | cngb3.1            | 0.075294731  | -0.249736043 | -0.588641013 | -0.198039383 |
| ENSDART00000158016 | flnca              | 5.435651542  | 4.853809922  | 4.737861308  | 3.940836376  |
| ENSDART00000158017 | GUCA1A (1 of many) | -1.245659292 | -0.578230856 | -1.064205686 | -1.242533296 |
| ENSDART00000158021 |                    | -0.273860764 | -0.2373593   | -0.233720455 | -0.186840477 |
| ENSDART00000158036 | cript              | -0.080102736 | -0.07683769  | -0.280131139 | -0.196435314 |
| ENSDART00000158042 | mdga2a             | -0.261819905 | -0.306879785 | -0.151540127 | 0.022043669  |
| ENSDART00000158052 | rnf130             | -0.205769239 | 0.102328211  | 0.30768262   | 0.182366646  |
| ENSDART00000158055 | kcnh6a             | -0.288242124 | -0.323669014 | -0.559331748 | -0.259833446 |
| ENSDART00000158072 | gpc2               | 0.147140386  | 0.761040446  | 1.023252339  | 0.612693915  |
| ENSDART00000158077 | arr3b              | -0.13602706  | -0.148118881 | -0.527427286 | -0.215489656 |
| ENSDART00000158098 | gpr132b            | -0.335128962 | -0.097182083 | 0.890467313  | 0.848088338  |
| ENSDART00000158123 | magi1b             | -0.699965885 | -0.960349882 | -0.3166938   | 0.663491004  |
| ENSDART00000158147 | calr3b             | 0.659493637  | 0.343153236  | 0.419640601  | 0.12486596   |
| ENSDART00000158154 | dlg2               | -0.258379843 | -0.32848175  | -0.404306744 | -0.064632311 |
| ENSDART00000158169 | cacna2d2a          | -0.273970943 | -0.601526504 | -0.288906256 | -0.138856816 |
| ENSDART00000158183 |                    | -0.077181373 | -0.541229915 | -0.5215371   | -0.066571696 |
| ENSDART00000158202 | CABZ01078449.1     | -0.388078647 | -0.185889564 | -2.923902226 | 0.109460724  |
| ENSDART00000158204 | ntrk3a             | -0.448230073 | -0.669954401 | -0.450935682 | -0.114414424 |
| ENSDART00000158212 | zgc:92161          | 0.66498591   | 0.968065208  | 0.600651955  | -0.278084019 |
| ENSDART00000158213 | akap12b            | -1.00724688  | -1.146388756 | -0.599808188 | 0.009805796  |
| ENSDART00000158245 | si:ch73-1a9.3      | -0.234948586 | -0.211979293 | -0.351222857 | -0.141776696 |
| ENSDART00000158259 | lrtm1              | -0.264679565 | -0.523836662 | -0.478235847 | -0.361630227 |
| ENSDART00000158260 | c1galt1a           | 0.184684125  | 0.138397385  | -0.286164045 | -0.509177074 |
| ENSDART00000158272 | dclk1b             | 0.134331666  | 0.528656936  | 0.571389243  | 0.299537528  |
| ENSDART00000158289 | taok1b             | -0.136932712 | -0.168799291 | -0.390684145 | -0.122927658 |
| ENSDART00000158290 | rpl24              | 0.677207663  | 0.41367136   | 0.306049933  | 0.275882655  |
| ENSDART00000158294 | ppp2r2cb           | -0.427479199 | -0.698226267 | -0.466339082 | -0.260646218 |
| ENSDART00000158301 | CR749168.4         | -0.284512048 | -0.514337485 | -0.519239658 | -0.283197555 |
| ENSDART00000158310 | sat2b              | -0.409697091 | -0.182271077 | -0.610869777 | -0.543847015 |

|                    |                   |              |              |              |              |
|--------------------|-------------------|--------------|--------------|--------------|--------------|
| ENSDART00000158311 | klhl7             | 0.128707755  | 0.106332897  | 0.351073118  | 0.278667069  |
| ENSDART00000158338 | CNNM1             | -0.362878072 | -0.490740729 | -0.646651234 | -0.29213891  |
| ENSDART00000158344 | apbb2b            | -0.312721901 | -0.306004033 | 0.116860588  | 0.307202209  |
| ENSDART00000158348 | zmiz1b            | 0.167782576  | 0.103403196  | 0.408056208  | 0.722421278  |
| ENSDART00000158354 | adarb2            | -0.457769313 | -0.257870403 | -0.020766954 | -0.013045223 |
| ENSDART00000158355 | bsk146            | -0.973617487 | -0.7163723   | -0.116416923 | 0.102394026  |
| ENSDART00000158358 | stk40             | -0.305579471 | -0.394234001 | -0.179882029 | -0.355392322 |
| ENSDART00000158364 | si:dkey-112e17.1  | -0.140789793 | -0.187774176 | -0.188421319 | -0.472049113 |
| ENSDART00000158373 | epc1b             | 0.106120055  | 0.059882061  | 0.624967071  | 0.299679159  |
| ENSDART00000158380 | si:dkey-35m8.1    | -0.462314219 | -0.595244504 | 0.018350172  | 0.199682571  |
| ENSDART00000158395 | dclk2a            | -0.152411223 | -0.291700953 | -0.710292221 | -0.218291454 |
| ENSDART00000158429 | tmem42b           | -0.433937172 | -0.428108528 | -0.048957595 | 0.127616146  |
| ENSDART00000158436 | lypla1            | 0.03667991   | -0.201169357 | -0.480610097 | -0.044568257 |
| ENSDART00000158439 | ece2b             | -0.235035459 | -0.256980434 | -0.233206993 | -0.167380402 |
| ENSDART00000158440 | arhgap12b         | -0.039244537 | -0.138433678 | -0.355110347 | -0.091493676 |
| ENSDART00000158466 | creb3l2           | 0.073267533  | 0.091531466  | -0.07087733  | -0.32121815  |
| ENSDART00000158489 | zgc:77058         | -0.495737975 | -0.228595493 | 0.141443601  | 0.440592752  |
| ENSDART00000158500 | atp8b2            | -0.533001796 | -0.553651375 | -0.17260282  | 0.179842571  |
| ENSDART00000158515 |                   | -0.601694587 | -0.246037227 | -0.439227399 | -0.290329932 |
| ENSDART00000158532 | gnb2              | -0.185937539 | 0.268112673  | 0.644184639  | 0.701859814  |
| ENSDART00000158533 | nup50             | 0.24455835   | 0.550142856  | 0.78129311   | 0.523300254  |
| ENSDART00000158540 | PRKCA (1 of many) | -0.338994629 | -0.305121271 | -0.237610526 | -0.160203254 |
| ENSDART00000158555 | camsap2a          | -0.296024961 | -0.235576155 | 0.04836376   | 0.162312505  |
| ENSDART00000158563 | wu:fj29h11        | 0.059907274  | -0.166860874 | 1.78519307   | 0.017403627  |
| ENSDART00000158564 | CU681842.1        | -0.1327123   | -0.276414972 | -0.289623815 | -0.090007903 |
| ENSDART00000158581 | spna2             | 0.480311119  | 0.377153274  | 0.267336877  | -0.085977531 |
| ENSDART00000158587 | casd1             | -0.21622109  | -0.133405356 | -0.572868553 | -0.255662771 |
| ENSDART00000158598 | si:ch211-232b12.5 | -0.304573383 | 0.212713124  | 0.452361247  | 0.038090441  |
| ENSDART00000158618 | cpne4b            | -1.041271467 | -0.75854166  | 0.438341768  | 1.045239509  |
| ENSDART00000158646 | dpp6a             | -0.408023938 | -0.433201282 | -0.219888215 | -0.008677852 |
| ENSDART00000158671 | sult4a1           | -0.462609111 | -0.368663113 | -0.083169387 | 0.19862288   |
| ENSDART00000158686 | si:dkey-14k9.2    | -0.49897987  | -0.263068549 | 0.75542148   | 1.074830065  |
| ENSDART00000158692 | CABZ01112401.1    | 0.113542035  | -0.344191992 | -0.461207823 | -0.256682679 |
| ENSDART00000158696 | mhc1zda           | -0.851268531 | -0.246667696 | -0.324999925 | -0.385360573 |
| ENSDART00000158721 |                   | 1.164230248  | 1.13549021   | 1.093110731  | 1.576844966  |
| ENSDART00000158723 | sncb              | -0.257429657 | -0.430720868 | -0.069889176 | 0.08182323   |
| ENSDART00000158733 | si:dkey-33i11.1   | 1.813729642  | 1.289849367  | 0.876112899  | 0.279282769  |
| ENSDART00000158734 | CABZ01088933.1    | -0.385251814 | -0.457284358 | 0.104668245  | 0.198079674  |
| ENSDART00000158739 | Metazoa_SRP       | 1.431390172  | 1.797550169  | 1.401344471  | 0.830250287  |
| ENSDART00000158743 | zgc:113348        | 0.011068258  | 0.221603341  | 0.278365427  | 0.216955383  |
| ENSDART00000158744 | BX927336.3        | 4.021248005  | 3.307131569  | 3.405842268  | 3.528289574  |
| ENSDART00000158766 | CR848025.1        | -0.596230295 | -0.433122151 | -0.989806185 | -0.729213035 |
| ENSDART00000158777 | cirbpa            | 0.225987764  | 0.314210398  | 0.241597292  | 0.01082888   |
| ENSDART00000158780 | mapk8ip1a         | 0.350641915  | 0.585959364  | 0.286490226  | -0.139620155 |
| ENSDART00000158808 | cnn3a             | 0.586268263  | 0.320248819  | -0.106889335 | -0.483977637 |
| ENSDART00000158810 | fkbp3             | -0.588686525 | -0.386876086 | -0.522309858 | -0.719247198 |
| ENSDART00000158817 | letm1             | -0.280849194 | -0.370052113 | -0.172062949 | -0.075482878 |
| ENSDART00000158820 | golga7bb          | -0.441549718 | -0.650879189 | -0.491036037 | -0.164497612 |
| ENSDART00000158825 | actc1b            | 0.015935591  | 2.858633574  | 3.729694641  | 2.583924646  |
| ENSDART00000158826 | CABZ01058650.1    | 0.277651195  | 0.407733859  | 0.060586967  | -0.150969128 |
| ENSDART00000158837 | dync1h1           | 0.179298196  | 0.363338197  | 0.829945857  | 0.598133568  |

|                    |                   |              |              |              |              |
|--------------------|-------------------|--------------|--------------|--------------|--------------|
| ENSDART00000158854 | tpd52l1           | -0.063123021 | -0.257733521 | -0.65813611  | -0.260747428 |
| ENSDART00000158917 | abhd10a           | -0.199951388 | -0.281143798 | -0.472212357 | -0.246558895 |
| ENSDART00000158919 | lpar1             | -0.789836287 | -0.638879508 | -0.710773837 | -0.465534721 |
| ENSDART00000158936 | grin1a            | -0.976292061 | -1.003442352 | -0.317903979 | 0.15163936   |
| ENSDART00000158962 | dpf2              | 0.023344289  | -0.160855631 | -0.651177712 | -0.029134577 |
| ENSDART00000158977 | si:ch73-266f23.1  | 0.491629493  | 0.41114477   | 0.471295394  | 0.297543095  |
| ENSDART00000159004 | si:ch73-233f7.8   | 0.057778797  | 0.28613349   | 0.517419704  | 0.568556694  |
| ENSDART00000159016 | psmd1             | 0.220320535  | 0.390334714  | 0.382386975  | 0.213567973  |
| ENSDART00000159024 | btr29             | 2.93548853   | 3.916483422  | 3.440636421  | 1.361130093  |
| ENSDART00000159034 | rsu1              | 0.959727483  | 0.959427671  | 0.950095712  | 0.424675541  |
| ENSDART00000159061 | si:ch211-185a18.2 | -0.270017947 | -0.418794122 | -0.535787315 | -0.21407671  |
| ENSDART00000159062 | paqr7a            | -0.415028281 | -0.250472931 | -0.476345463 | -0.551526055 |
| ENSDART00000159087 | drd2b             | -0.654775306 | -0.766659414 | -0.766987138 | -0.309487495 |
| ENSDART00000159103 | nkd3              | 3.293495606  | 1.842810424  | 2.875712797  | 0.7112483    |
| ENSDART00000159104 | atp1b2a           | -0.488650552 | -0.417675156 | -0.129746035 | 0.084213141  |
| ENSDART00000159112 | si:ch211-285j22.3 | -0.41628689  | -0.545704947 | -0.599123468 | -0.263727805 |
| ENSDART00000159123 | btbd17b           | -0.172708316 | -0.362184438 | -0.675325658 | -0.245697841 |
| ENSDART00000159142 | si:dkey-56m15.2   | 0.312405009  | 0.342224899  | 0.497281083  | 0.253644828  |
| ENSDART00000159160 | impdh1b           | 0.016028158  | -0.054860403 | 0.596376969  | 0.34908306   |
| ENSDART00000159163 | c2cd2l            | -0.400916824 | -0.28913261  | -0.285175907 | -0.160469096 |
| ENSDART00000159165 | b3galt2           | -0.421223634 | -0.395995108 | -0.436113716 | -0.390524412 |
| ENSDART00000159177 | si:dkey-61n16.5   | -0.004555446 | 0.268605493  | -0.72825811  | -0.687838681 |
| ENSDART00000159178 | hspa8             | -1.810725395 | -0.905134344 | -6.819365873 | -1.947204217 |
| ENSDART00000159184 | erc2              | 0.268311207  | -0.09915171  | 0.379637611  | 0.748745363  |
| ENSDART00000159246 | ctsa              | 0.554249571  | 0.498653237  | 0.219459997  | 0.055975716  |
| ENSDART00000159249 | oxr1a             | -0.748854688 | -0.518408458 | -0.301236362 | -0.153948362 |
| ENSDART00000159252 | abca3b            | 0.181429492  | 0.428459166  | 0.640212151  | 0.464148107  |
| ENSDART00000159256 | kif5c             | 0.534952361  | 0.603334839  | 0.411520272  | 0.273079865  |
| ENSDART00000159259 | capn1b            | 0.6323058    | 1.402210713  | 1.384902028  | 1.097440242  |
| ENSDART00000159274 | sf3b3             | 0.246778314  | 0.098942964  | 0.083691016  | -0.027346389 |
| ENSDART00000159291 | podxl2            | -0.45367951  | -0.207714244 | 0.333702352  | 0.497299671  |
| ENSDART00000159296 | si:ch73-138e16.4  | -0.371496737 | -0.627266426 | -0.52708555  | -0.509641971 |
| ENSDART00000159300 | mcm7              | 0.714704002  | 0.831682391  | 0.874291792  | 0.339164006  |
| ENSDART00000159312 | pim1              | 0.541604371  | 0.710042231  | 0.310719343  | -0.194529837 |
| ENSDART00000159316 | mvda              | 0.177821409  | 1.524901044  | 1.830059782  | 0.927790622  |
| ENSDART00000159328 | FO704782.1        | 0.142074859  | 0.061082305  | 0.804157236  | 0.053378695  |
| ENSDART00000159330 | pcyox1            | 0.406833689  | 0.21789945   | 0.044242143  | -0.158070725 |
| ENSDART00000159340 | ctnnd1            | 0.771872624  | 0.982959313  | 0.944642837  | 0.226155974  |
| ENSDART00000159368 | myo19             | -0.061571264 | -0.562765185 | -0.263758975 | -0.061266965 |
| ENSDART00000159372 | eif3ha            | 0.499618724  | 0.599836819  | 0.638052337  | 0.263915251  |
| ENSDART00000159390 | FO704846.1        | -0.36021367  | -0.403087033 | 0.444915596  | 0.998151126  |
| ENSDART00000159409 | unc45a            | 0.063679601  | 0.06008134   | 0.330631234  | 0.129605203  |
| ENSDART00000159433 | BX571691.1        | 2.919338685  | 1.742268402  | 2.797274384  | 2.742997875  |
| ENSDART00000159434 | tmem254           | 0.529951039  | 0.26685766   | 0.074245289  | -0.042910999 |
| ENSDART00000159435 | pcdh2g28          | 0.000816386  | 0.116171     | 0.335030381  | 0.350715644  |
| ENSDART00000159438 | zgc:162730        | 0.775020432  | 0.781916155  | 0.788293058  | 0.232021834  |
| ENSDART00000159450 | ctnnd1            | 0.19135693   | 0.714895836  | -0.026058241 | 0.026164146  |
| ENSDART00000159454 | CABZ01044277.1    | 0.109016927  | 0.066686129  | 0.335359626  | 0.279394938  |
| ENSDART00000159466 | FUT9 (1 of many)  | -0.32488192  | -0.508163292 | -0.746293394 | -0.756603469 |
| ENSDART00000159486 | anapc11           | -0.082411238 | -0.111278818 | -0.383958603 | -0.347049397 |
| ENSDART00000159491 | ddx46             | 0.204487031  | 0.180157737  | 0.416223492  | 0.263114106  |



|                    |                    |              |              |              |              |
|--------------------|--------------------|--------------|--------------|--------------|--------------|
| ENSDART00000159493 | baiap2a            | -0.408759075 | -0.584635172 | -0.205977447 | -0.074404323 |
| ENSDART00000159519 | SIKE1              | -0.137869817 | -0.17784406  | -0.297014412 | -0.12625892  |
| ENSDART00000159520 | dusp1              | 1.00607749   | 1.105172193  | 0.739133795  | 1.131411014  |
| ENSDART00000159523 | BX248501.1         | -0.802081931 | -1.281225474 | -1.178391388 | -0.841643515 |
| ENSDART00000159534 | leng9              | 0.34368633   | 0.401471128  | 0.132926162  | 0.109702136  |
| ENSDART00000159543 | si:ch211-284e13.6  | -2.69508904  | -0.200744398 | -0.117258809 | -0.389858773 |
| ENSDART00000159581 | CT583723.1         | -0.203564175 | -0.159816156 | -0.458224986 | -0.16588667  |
| ENSDART00000159588 | rnf24              | -0.199572807 | -0.336306858 | -0.290748993 | -0.299485771 |
| ENSDART00000159589 | rtn4rl1b           | -0.618605611 | -0.334861623 | -0.03219779  | 0.419833076  |
| ENSDART00000159601 | serpini1           | -0.44709139  | -0.357709199 | -0.198408132 | 0.076823185  |
| ENSDART00000159604 | mbd3b              | -0.404570692 | -0.312781624 | -0.318828454 | -0.248466452 |
| ENSDART00000159608 | fstl5              | -0.296329015 | -0.522282128 | -0.291629941 | -0.144161607 |
| ENSDART00000159614 | r3hdm1             | -0.174685122 | -0.341121434 | 0.099641284  | 0.042466817  |
| ENSDART00000159620 |                    | 0.106577262  | 0.152035698  | 0.604289635  | 0.634717201  |
| ENSDART00000159627 | scn4ba             | -1.651719386 | -1.747876787 | -0.730948262 | -0.207716251 |
| ENSDART00000159629 | mcm2               | 0.995796878  | 0.693727511  | 0.639304212  | 0.157223466  |
| ENSDART00000159634 | b3glcta            | -0.092602693 | -0.194400961 | -0.44155461  | -0.530900199 |
| ENSDART00000159642 | DPP10              | -0.369468467 | -0.43082527  | -0.361060788 | -0.270120898 |
| ENSDART00000159652 | sox4b              | 0.767109202  | 1.080655119  | 1.389017231  | 0.976257694  |
| ENSDART00000159654 | CR847844.2         | 0.025394661  | -0.340096605 | -0.548288987 | -0.346027376 |
| ENSDART00000159670 | abtb1              | -0.10462458  | -0.155472174 | -0.372376774 | -0.233981977 |
| ENSDART00000159673 | dync1i2b           | 0.025252757  | 0.176262587  | 0.413723725  | 0.300516643  |
| ENSDART00000159690 | gpr75              | -0.483974147 | -0.377125661 | 0.037666989  | 0.123067934  |
| ENSDART00000159693 | NYAP1              | -0.548984567 | -0.516611795 | -0.021366781 | 0.000605996  |
| ENSDART00000159697 | si:rp71-5o12.3     | 0.531788358  | 0.397969004  | 0.570994446  | 0.299640856  |
| ENSDART00000159716 | si:ch73-236c18.6   | 0.962463693  | 0.259951761  | 0.066014607  | 0.162933451  |
| ENSDART00000159725 | mtm1               | -0.155968464 | -0.279489824 | -0.277642503 | -0.186816665 |
| ENSDART00000159727 | pcdh11             | -0.294947297 | -0.365638864 | -0.089140913 | 0.17419873   |
| ENSDART00000159732 | si:dkey-203a12.8   | 3.015691266  | 3.637172924  | 3.104587293  | 1.713663998  |
| ENSDART00000159733 | CABZ01063757.1     | 0.129910694  | -0.203491407 | -0.855433405 | -0.227320323 |
| ENSDART00000159745 | PCP4L1 (1 of many) | -0.632453626 | -0.700162017 | -0.354659005 | -0.133179733 |
| ENSDART00000159747 | rab11fip4b         | -0.416792935 | -0.701212044 | -0.335764895 | -0.067364991 |
| ENSDART00000159752 | sort1a             | -0.095510148 | -0.060577332 | -0.362899297 | -0.357946523 |
| ENSDART00000159769 | pam                | -0.468861179 | -0.403502349 | -0.282541701 | -0.241769832 |
| ENSDART00000159782 | agtpbp1            | -0.044706055 | 0.173624177  | 0.473061984  | 0.407831162  |
| ENSDART00000159805 | CABZ01085924.1     | -0.392684277 | -0.456709342 | 0.004929566  | 0.18758642   |
| ENSDART00000159845 | epb41a             | -0.285946023 | -0.193154687 | -0.17771991  | -0.091337383 |
| ENSDART00000159853 | FQ311890.1         | -0.276177481 | -0.432407927 | -0.032078728 | 0.27665545   |
| ENSDART00000159859 | tmem132e           | -0.259691326 | -0.228995571 | -0.113717547 | -0.037626683 |
| ENSDART00000159871 | ptk2aa             | 0.224270244  | 0.259268875  | 0.303476245  | 0.275768955  |
| ENSDART00000159899 | mapk10             | -0.350531159 | -0.285511604 | -0.104624207 | 0.054397304  |
| ENSDART00000159908 | camk1db            | -0.548571048 | -0.478436516 | -0.873630088 | -0.641909911 |
| ENSDART00000159916 | tns1a              | -0.270694335 | -0.694531751 | -0.372872148 | -0.014128978 |
| ENSDART00000159928 | si:dkey-274m17.3   | -0.105974275 | -0.260400887 | -0.454854053 | -0.384734441 |
| ENSDART00000159942 | kcnc3b             | -0.794025304 | -1.361623092 | -0.389946342 | 0.009706478  |
| ENSDART00000159949 | wdr1               | 0.362540326  | 0.308247591  | 0.564916756  | 0.170183845  |
| ENSDART00000159950 | si:ch1073-450f2.1  | -0.285454261 | -0.252056938 | -0.418320337 | -0.16839092  |
| ENSDART00000159952 | sema5bb            | 0.4270075    | 0.43121825   | 0.280410439  | 0.178648412  |
| ENSDART00000159956 | ndufa4l2a          | 0.563891792  | 0.528048098  | 0.326797956  | 0.131990505  |
| ENSDART00000159958 | hcn1               | -0.047230014 | -0.465327973 | -0.263546106 | -0.045423137 |
| ENSDART00000159965 | si:ch211-255i3.4   | 0.121150704  | 0.407179882  | 0.241107117  | 0.125992518  |

|                    |                    |              |              |              |              |
|--------------------|--------------------|--------------|--------------|--------------|--------------|
| ENSDART00000159987 | si:dkey-65b13.13   | -0.209652039 | -0.259703439 | -0.637719895 | -0.234430743 |
| ENSDART00000159989 | cpne7              | -0.2792921   | -0.302878059 | -0.342117017 | -0.194332814 |
| ENSDART00000159997 | cacna1ab           | -0.118996824 | -0.488974274 | -0.025554874 | 0.331301032  |
| ENSDART00000160000 | spd1l              | 1.145158953  | 1.158182543  | 1.166185329  | 0.390123322  |
| ENSDART00000160006 | Metazoa_SRP        | 1.639017988  | 2.129447988  | 1.830106321  | 0.946987666  |
| ENSDART00000160017 | CABZ01058261.1     | 0.903038959  | 0.866986019  | 0.595792077  | 0.158138964  |
| ENSDART00000160018 | DUSP26             | -0.660306321 | -0.709450564 | -0.129656337 | 0.007184288  |
| ENSDART00000160048 |                    | 1.164230248  | 1.13549021   | 1.093110731  | 1.576844966  |
| ENSDART00000160055 | CABZ01048399.1     | 2.04373243   | 1.562490919  | 0.966755902  | 1.237958862  |
| ENSDART00000160073 | sntg2              | -0.084902345 | -0.387083384 | -0.20960703  | -0.013813106 |
| ENSDART00000160107 | CU639413.1         | 0.54252914   | 0.409259037  | 1.419043143  | 0.130740048  |
| ENSDART00000160115 | per1a              | 0.041503641  | -0.272737679 | -0.476359218 | -0.15653808  |
| ENSDART00000160116 | racgap1            | 0.647984241  | 0.386764067  | 0.354192772  | 0.100327502  |
| ENSDART00000160134 | hibadha            | -0.191259291 | -0.221221329 | -0.647202373 | -0.244609156 |
| ENSDART00000160138 | sobpa              | -0.321225255 | -0.895188795 | -0.069068022 | 0.312612038  |
| ENSDART00000160154 | si:dkey-238i5.2    | -0.200329967 | 0.657530632  | 1.151706484  | 1.107326351  |
| ENSDART00000160155 | PDCL3              | 1.150151141  | 1.512943629  | 1.437587964  | 2.391657524  |
| ENSDART00000160175 | SYNDIG1            | -0.028604943 | -0.23293463  | -0.464850771 | -0.153309965 |
| ENSDART00000160177 | kcnb2              | 4.745895577  | 4.144383899  | 5.457366505  | 5.666212289  |
| ENSDART00000160189 | hip1rb             | -0.298878525 | -0.25639736  | 0.130568312  | 0.08288489   |
| ENSDART00000160201 | tnfrsf11b          | 2.52634883   | 1.22900254   | 0.873090756  | -0.039240801 |
| ENSDART00000160206 | rap2b              | 0.536023906  | 0.628551975  | 0.691733134  | 0.267820563  |
| ENSDART00000160209 | si:ch211-204a13.2  | -0.408114948 | -0.445711734 | -0.270878027 | 0.146816503  |
| ENSDART00000160220 | kif5aa             | -0.17024292  | 0.126849007  | 0.479028265  | 0.345007215  |
| ENSDART00000160236 | fras1              | -0.444181856 | -0.638830186 | -0.533612869 | -0.242512624 |
| ENSDART00000160242 | TYMP               | -0.668893964 | -0.374517624 | -0.757876583 | -0.434642219 |
| ENSDART00000160245 | si:ch73-236c18.7   | 2.124440879  | 1.318007353  | 1.287829039  | 0.437471879  |
| ENSDART00000160284 | pclob              | -0.164621492 | -0.643566861 | -0.569524507 | -0.247739035 |
| ENSDART00000160288 | FP236812.6         | 0.238382616  | 0.543365019  | 0.866982901  | 0.48841948   |
| ENSDART00000160297 | vcana              | 1.601498468  | 0.665214133  | 0.454293537  | 0.486706931  |
| ENSDART00000160305 | si:zfos-943e10.1   | -0.732433247 | -0.018482138 | -0.2347001   | -0.520119378 |
| ENSDART00000160308 | pde3a              | -0.225066293 | -0.312371173 | 0.037986462  | 0.082811204  |
| ENSDART00000160324 | CABZ01102047.1     | -0.357465059 | -0.236339235 | 0.433910345  | 0.432628055  |
| ENSDART00000160328 | zgc:109949         | -0.362552375 | -0.659300829 | -0.471802707 | -0.430381288 |
| ENSDART00000160331 | atp6v0e1           | 0.536560194  | 0.109862681  | -0.220128717 | -0.336777163 |
| ENSDART00000160337 | si:ch73-299h12.8   | -0.912707831 | -0.414120081 | -0.53567861  | -0.405510308 |
| ENSDART00000160350 | IQSEC1 (1 of many) | -0.73025949  | -0.724161984 | -0.227945297 | -0.158150827 |
| ENSDART00000160362 | EGFLAM             | -0.160131743 | -0.324587558 | -0.48719254  | -0.200185739 |
| ENSDART00000160400 | gchfr              | -0.373470826 | -0.390793782 | -0.620398999 | -0.352985133 |
| ENSDART00000160401 | tmem63ba           | -0.025633015 | 0.10439182   | 0.273009198  | 0.198949087  |
| ENSDART00000160409 | arf6a              | 0.10280988   | -0.030227439 | 0.312347712  | -0.095328656 |
| ENSDART00000160424 | ftf36              | -0.057998525 | -0.261050684 | 0.030750272  | -0.246695716 |
| ENSDART00000160425 | LAMP1              | -0.291224845 | -0.711008477 | -0.768820578 | -0.726430297 |
| ENSDART00000160431 | dhrrs13l1          | -0.306310555 | -0.206975564 | -0.316329966 | -0.293060295 |
| ENSDART00000160439 | CABZ01037298.1     | -0.12483018  | -0.201319697 | -0.520978425 | -0.240731645 |
| ENSDART00000160444 | si:dkey-95j14.1    | -0.172108125 | 0.025439256  | 0.48271623   | 0.286285124  |
| ENSDART00000160450 | CU571069.1         | -0.391785076 | -0.855515025 | -0.904047805 | -0.612021184 |
| ENSDART00000160464 | pcdh1gb2           | -0.570850707 | -0.31567681  | -0.173184848 | -0.165810233 |
| ENSDART00000160465 | opn6a              | -0.331059122 | -0.451170972 | -0.507697352 | -0.105376089 |
| ENSDART00000160466 | ndrg4              | -0.797536516 | -0.447807808 | -0.265830716 | -0.169347229 |
| ENSDART00000160468 | ubl3a              | -0.157200321 | -0.291255908 | -0.684230474 | -0.436379037 |

|                    |                   |              |              |              |              |
|--------------------|-------------------|--------------|--------------|--------------|--------------|
| ENSDART00000160469 | si:ch211-271b14.1 | -0.816113506 | -0.956386746 | -0.419124903 | -0.031051269 |
| ENSDART00000160492 | alad              | 0.30171604   | 0.443307609  | 0.248348623  | 0.158762163  |
| ENSDART00000160495 | si:dkey-184p18.2  | 0.380936601  | -0.937356475 | -0.364392869 | -0.267264411 |
| ENSDART00000160503 | slc15a4           | 0.534058917  | 0.262741482  | 0.05558204   | -0.165911292 |
| ENSDART00000160509 | trip10a           | 5.462743185  | 3.19366481   | 2.422825884  | 1.530105247  |
| ENSDART00000160527 | prokr1a           | 0.020123926  | -0.217659905 | -0.314012019 | -0.217346505 |
| ENSDART00000160536 | gnsb              | 1.380175579  | 0.91424754   | 0.488823056  | 0.00723105   |
| ENSDART00000160538 | arhgap21a         | -0.416942655 | -0.374699279 | -1.045101409 | -0.721453587 |
| ENSDART00000160542 | cabp2a            | -0.310654407 | -0.386778791 | -0.172317372 | -0.340396034 |
| ENSDART00000160555 | sema6e            | -0.284106568 | -0.324928323 | -0.250029521 | -0.168860793 |
| ENSDART00000160562 | impg2b            | 0.024461351  | -0.26080833  | -0.706384589 | -0.340668028 |
| ENSDART00000160564 | cyyr1             | -0.193986492 | -0.219795811 | -0.518063496 | -0.536169671 |
| ENSDART00000160566 | PPEF2             | 0.06510909   | 0.104690545  | -0.262166795 | 0.034536141  |
| ENSDART00000160571 | mxe               | 0.057431509  | -0.237146132 | 2.037062599  | -0.095948656 |
| ENSDART00000160575 | CU459186.1        | 0.73831154   | 1.064084865  | 0.743119809  | 0.540430362  |
| ENSDART00000160582 | creb5a            | 2.028867303  | 1.691967909  | 1.27021295   | 0.836790625  |
| ENSDART00000160588 | si:dkeyp-86d6.2   | -0.052465168 | -0.307686486 | -0.441266657 | -0.083441391 |
| ENSDART00000160600 | cecr5             | -0.047380691 | 0.036242917  | 0.854821049  | 0.34511846   |
| ENSDART00000160604 | ftsj3             | 0.856590556  | 0.695492085  | 0.825371198  | 0.428239045  |
| ENSDART00000160606 | mat2aa            | 0.169445123  | 0.256103943  | 0.254062393  | 0.177493443  |
| ENSDART00000160612 | bin3              | 0.276069755  | 0.185522197  | -0.128294303 | -0.167255765 |
| ENSDART00000160614 | tmem106ba         | -0.216998722 | -0.275060394 | -0.388680799 | -0.295077411 |
| ENSDART00000160652 | iqsec3a           | -0.564945044 | -0.609250827 | -0.334399494 | -0.124185292 |
| ENSDART00000160662 | CABZ01056578.1    | -0.678580777 | -0.38089804  | -0.298190661 | -0.130306976 |
| ENSDART00000160663 | tnk2b             | 0.180874765  | 0.228576581  | 0.365115453  | 0.173216656  |
| ENSDART00000160672 | MYH7 (1 of many)  | 0.452458943  | 2.61830504   | 2.948579403  | 1.474866684  |
| ENSDART00000160700 | dnm1l             | -0.370704077 | -0.348232697 | -0.495814147 | -0.141373029 |
| ENSDART00000160707 | smx5              | -0.006041688 | -0.141079427 | -0.427667941 | -0.488718653 |
| ENSDART00000160712 | dusp1             | 0.749410253  | 0.773951106  | 0.584904324  | 1.278120339  |
| ENSDART00000160715 | pik3r3a           | -0.538136397 | -0.043164195 | -0.249012844 | -0.109162985 |
| ENSDART00000160738 | arhgap11a         | 2.137805097  | 2.112857321  | 2.062351639  | 2.227173194  |
| ENSDART00000160742 | clmn              | -0.341601235 | -0.332225059 | -0.489517534 | -0.288919784 |
| ENSDART00000160753 | GANAB (1 of many) | 0.004666803  | -0.095016348 | -0.32432452  | -0.161685037 |
| ENSDART00000160763 | Metazoa_SRP       | 1.465611255  | 3.00506243   | 2.307455794  | 0.729030238  |
| ENSDART00000160766 | pim1              | 0.465870139  | 0.649909313  | 0.413306503  | 0.082988542  |
| ENSDART00000160767 | zgc:153845        | -0.366926311 | -0.362052716 | -0.223963795 | -0.098406698 |
| ENSDART00000160783 | rorcb             | -0.657257878 | 0.184912673  | 0.679992874  | 0.484278813  |
| ENSDART00000160789 | SDK2 (1 of many)  | -0.531586731 | -0.76443238  | -0.126364502 | 0.194536592  |
| ENSDART00000160809 | agap1             | -0.12094537  | -0.11171461  | 0.245949776  | 0.322867446  |
| ENSDART00000160811 | b3gat1a           | -0.509506437 | -0.522178413 | -0.230803048 | 0.152925891  |
| ENSDART00000160829 | mhc1zda           | -0.410179214 | -0.276613879 | -0.418038837 | -0.322538004 |
| ENSDART00000160840 | prkar1b           | -0.31036091  | -0.161481279 | -0.113380497 | -0.010356954 |
| ENSDART00000160841 | si:ch211-248g20.5 | -0.153486145 | -0.342330243 | -0.525669956 | -0.178412263 |
| ENSDART00000160847 | hgh1              | 0.505719048  | 0.435629442  | 0.388567431  | 0.068708352  |
| ENSDART00000160850 | inpp5e            | -0.436095235 | -0.00283574  | 0.156525888  | 0.020455167  |
| ENSDART00000160866 | cry2              | -0.114688269 | -0.279009524 | -0.604836383 | -0.332518261 |
| ENSDART00000160881 | pcdh1g30          | -0.53895262  | -0.083348601 | 0.159825551  | 0.241016465  |
| ENSDART00000160885 | stbd1             | -0.425801769 | -0.465748469 | -0.195945725 | 0.034690374  |
| ENSDART00000160901 | FMNL1 (1 of many) | 1.814810207  | 1.982271858  | 2.471309982  | 2.117776194  |
| ENSDART00000160902 | naga              | 0.641123507  | 0.233762511  | 0.291444137  | -0.017668678 |
| ENSDART00000160927 | cers1             | -0.519571193 | -0.339170129 | -0.296459142 | -0.066758323 |

|                    |                   |              |              |              |              |
|--------------------|-------------------|--------------|--------------|--------------|--------------|
| ENSDART00000160933 | si:ch211-153l6.6  | -0.192271617 | -0.190332633 | -0.289802511 | -0.209468422 |
| ENSDART00000160950 | dyrk1b            | -0.419283008 | -0.231908493 | 0.058730046  | 0.190507005  |
| ENSDART00000160955 | slc38a3b          | -0.475545538 | -0.367921084 | -0.471714594 | -0.850494481 |
| ENSDART00000160956 | oaz1b             | -0.133855172 | -0.165932835 | -0.380106363 | -0.375655267 |
| ENSDART00000160979 | jpt1b             | 0.682460724  | 1.366219793  | 1.515562314  | 0.876953288  |
| ENSDART00000161002 | kbtbd11           | -0.286857265 | -0.122332373 | -0.245379055 | -0.228313034 |
| ENSDART00000161003 | cpne9             | -1.056006542 | -1.193405404 | -0.117014879 | 0.290018934  |
| ENSDART00000161007 | ets2              | -0.669649632 | -0.198034695 | -0.011258584 | -0.233709301 |
| ENSDART00000161008 | filip1a           | 1.277613198  | 1.48763933   | 0.952639764  | 1.12798471   |
| ENSDART00000161017 | EIF3S6IP          | 0.313830903  | 0.293421495  | 0.276651786  | 0.120270233  |
| ENSDART00000161040 | U1                | 0.811168663  | 0.450901632  | 0.418592021  | 0.580227266  |
| ENSDART00000161048 | psmf1             | -0.002898908 | -0.064926331 | 0.496331974  | -0.135580746 |
| ENSDART00000161056 | zgc:63587         | 0.468520933  | 0.333532949  | 0.066863333  | -0.028483781 |
| ENSDART00000161059 | tusc2a            | 0.068801861  | -0.121312821 | -0.423616648 | -0.242714442 |
| ENSDART00000161063 | heatr1            | 0.383217268  | 0.256645773  | 0.173900631  | 0.113179939  |
| ENSDART00000161081 | satb1a            | -0.172286726 | 0.059256047  | 0.306569639  | 0.367466245  |
| ENSDART00000161087 | efna3b            | -0.321733474 | -0.009174863 | 0.104028903  | 0.249289152  |
| ENSDART00000161100 | FAT3 (1 of many)  | -0.16621971  | -0.375379053 | -0.163291758 | -0.002633554 |
| ENSDART00000161101 | lyrm5a            | -0.096487275 | -0.208413777 | -0.302906059 | -0.144622611 |
| ENSDART00000161107 | pcdh1g9           | 0.063645152  | 0.386867409  | 0.439855094  | 0.563716536  |
| ENSDART00000161115 | CR382281.1        | -1.148281272 | -0.70950654  | -0.315399276 | 0.210191426  |
| ENSDART00000161117 |                   | 0.194355392  | 0.331000906  | 0.496659366  | 0.20108058   |
| ENSDART00000161121 | oxct1a            | -0.18384202  | -0.521566935 | -0.230939432 | -0.260776637 |
| ENSDART00000161137 | scn1bb            | -0.455645009 | -0.546610376 | 0.183837534  | 0.407926687  |
| ENSDART00000161153 | GAN               | -0.076211127 | 0.283155249  | 0.536837618  | 0.420868128  |
| ENSDART00000161156 | kcnj9             | -0.647175508 | -0.597438502 | -0.398278727 | -0.23455974  |
| ENSDART00000161168 | si:ch211-232d10.1 | -0.094530829 | -0.188391079 | -0.421762057 | -0.370881661 |
| ENSDART00000161184 | si:dkey-238f9.1   | -0.217284848 | -0.396117732 | -0.370650729 | 0.049289618  |
| ENSDART00000161216 | dync1i2a          | 1.005522301  | 0.520541958  | 0.468549497  | -0.022454144 |
| ENSDART00000161230 | arhgef12b         | 0.167990134  | 0.325221884  | 0.334885818  | 0.114051067  |
| ENSDART00000161240 | zgc:92161         | 0.584076871  | 0.663364233  | 0.486030672  | 0.10810748   |
| ENSDART00000161244 | CR293509.1        | 0.407469749  | 1.465267423  | 1.274347742  | 0.975210426  |
| ENSDART00000161250 | grin1b            | -0.242810387 | -0.349766254 | -0.246157691 | 0.067747546  |
| ENSDART00000161261 | Imbrd2a           | -0.185598793 | -0.153033552 | -0.360733538 | -0.113007589 |
| ENSDART00000161264 | ntrk3b            | -0.768053413 | -0.724776652 | -0.30616772  | 0.183034577  |
| ENSDART00000161266 | CU928046.1        | -0.122276569 | -0.195535625 | -0.336584046 | -0.188368371 |
| ENSDART00000161272 | dclk1a            | -0.780154894 | -0.444639927 | -0.375433616 | -0.486681237 |
| ENSDART00000161297 | lrrn3b            | -0.369968613 | -0.470809526 | -0.36045804  | -0.046069156 |
| ENSDART00000161322 | slc29a1a          | 0.535023852  | 0.636573744  | 0.365586045  | -0.115892928 |
| ENSDART00000161330 | col27a1a          | 0.210670367  | 0.547410859  | 0.646435326  | 0.255665234  |
| ENSDART00000161347 | CT583728.4        | 1.170122423  | 1.14685482   | 1.328877257  | 0.769737347  |
| ENSDART00000161377 | cdk2ap2           | 0.241317874  | 0.341753789  | 0.416424679  | 0.144968334  |
| ENSDART00000161389 | CR388042.1        | 0.279433291  | 0.140072251  | 0.112517442  | 0.232646376  |
| ENSDART00000161397 | atg13             | -0.137451879 | -0.18705676  | -0.405447689 | -0.269252338 |
| ENSDART00000161407 | tnika             | -0.172678134 | 0.105967748  | 0.465016741  | 0.501980476  |
| ENSDART00000161414 | meis2a            | -0.352024462 | -0.259692709 | -0.258698057 | -0.07620107  |
| ENSDART00000161421 | zgc:194627        | 1.998498644  | 1.298544665  | 0.773438314  | 0.249109157  |
| ENSDART00000161436 | pcdh7b            | -0.687665671 | -0.773740554 | -0.245502692 | 0.12030382   |
| ENSDART00000161440 | limch1b           | -0.008873535 | -0.193340096 | -0.430561872 | -0.157445684 |
| ENSDART00000161445 | fkrp              | -0.298106015 | -0.219330579 | -0.124679519 | -0.039794435 |
| ENSDART00000161456 | zgc:153924        | -0.044959851 | 0.322360252  | 0.292539556  | -0.042756925 |

|                    |                    |              |              |              |              |
|--------------------|--------------------|--------------|--------------|--------------|--------------|
| ENSDART00000161460 | pmt                | 2.538801298  | 3.7270331    | 2.780124527  | 1.870914111  |
| ENSDART00000161505 | mgrn1a             | -0.282029057 | -0.374993034 | -0.219589284 | -0.246471373 |
| ENSDART00000161507 | zgc:153426         | -1.880708803 | -0.117657621 | 0.865737326  | 1.072245785  |
| ENSDART00000161514 | CABZ01079986.1     | -0.184749182 | 1.474076268  | 0.73277167   | -0.443845367 |
| ENSDART00000161525 | zgc:171704         | 0.267822787  | -0.368878081 | -1.0813007   | -1.211102226 |
| ENSDART00000161532 | zfyve9b            | -0.607365928 | -0.871459147 | -0.090833114 | 0.138377783  |
| ENSDART00000161533 | gfra1b             | -0.396684985 | -0.507239408 | -0.32341327  | -0.285757426 |
| ENSDART00000161561 | ANK1 (1 of many)   | -0.90876402  | -0.980007711 | -0.299110873 | -0.111310605 |
| ENSDART00000161566 | b4galt6            | 0.155163411  | 0.348743299  | 0.367166825  | 0.307075635  |
| ENSDART00000161567 | KCNT1 (1 of many)  | -0.564631347 | -0.618941642 | -0.212804629 | 0.112863315  |
| ENSDART00000161582 | ubfd1              | 0.213892452  | 0.378867256  | 0.328612523  | 0.082100895  |
| ENSDART00000161586 | flot2a             | 0.149914225  | 0.375737842  | 0.414499477  | 0.21470497   |
| ENSDART00000161597 | si:ch211-262i1.3   | 0.726810222  | 0.918966234  | 1.284521547  | 0.120004192  |
| ENSDART00000161613 | SLC7A1 (1 of many) | 0.777752401  | 1.137604367  | 0.924750387  | 0.450737498  |
| ENSDART00000161646 | sema6bb            | -0.22063759  | -0.362707192 | -0.160882628 | 0.032299092  |
| ENSDART00000161647 | fnbp1b             | 0.397270086  | 0.395681626  | 0.254962279  | -0.147831954 |
| ENSDART00000161650 | atp2a2b            | 0.018261356  | 0.090439762  | 0.265163492  | 0.020190481  |
| ENSDART00000161652 | si:dkeyp-72e1.9    | -0.109528412 | -0.231594686 | -0.432617543 | -0.203491956 |
| ENSDART00000161662 | ttbk1a             | -0.363444816 | 0.177390115  | 0.591497043  | 0.421229884  |
| ENSDART00000161673 | CR450729.3         | -0.466290317 | -0.130444226 | -0.527062063 | -0.184859299 |
| ENSDART00000161693 | cetn2              | -0.42442122  | 0.157217987  | 0.592113306  | 0.77779027   |
| ENSDART00000161698 | spock1             | -0.400537237 | -0.522818259 | -0.36383883  | -0.3494177   |
| ENSDART00000161700 | st3gal2            | -0.330022994 | -0.187434223 | 0.066957229  | 0.392836726  |
| ENSDART00000161704 | CNDP1              | -0.617638491 | -0.321066179 | -0.670749127 | -2.338544776 |
| ENSDART00000161708 | si:ch73-29I19.1    | -0.183985257 | -0.352166832 | -0.310452263 | -0.095145467 |
| ENSDART00000161725 | map7d1a            | -0.696007823 | -0.432281688 | 0.042931769  | 0.13512701   |
| ENSDART00000161735 | flrt1a             | -0.150942569 | -0.355176624 | -0.261636355 | -0.097731299 |
| ENSDART00000161755 | CU681842.1         | -0.157328162 | -0.245310878 | -0.348302227 | -0.161138988 |
| ENSDART00000161770 | cpne9              | -0.832265602 | -0.611063661 | -0.201518154 | 0.170760147  |
| ENSDART00000161773 | KCNJ11 (1 of many) | -0.422252277 | -0.360338989 | -0.607728772 | -0.332578335 |
| ENSDART00000161798 | si:ch211-188f17.1  | -0.190236489 | -0.379885925 | -0.177844783 | -0.0015826   |
| ENSDART00000161807 | gnl2               | 0.286549103  | 0.322764935  | 0.293655806  | 0.087475664  |
| ENSDART00000161818 | prr33              | 0.089254338  | 1.155971891  | 0.95184285   | 0.668590241  |
| ENSDART00000161823 | ubl3a              | -0.089124518 | -0.239047703 | -0.471864878 | -0.290785384 |
| ENSDART00000161828 | si:rp71-1h20.9     | -1.646379844 | -1.190834107 | -1.032421214 | -1.471047696 |
| ENSDART00000161840 | CT574575.1         | -0.29915223  | -0.372107241 | -0.764083264 | -0.340151107 |
| ENSDART00000161854 | pls3               | 0.235895362  | 0.649174918  | 0.495504879  | 0.31420242   |
| ENSDART00000161869 | dysf               | 1.077492273  | 1.30463907   | 1.440346007  | 1.017975966  |
| ENSDART00000161882 | bzw2               | 0.083435949  | -0.31200966  | -0.5490146   | -0.324311149 |
| ENSDART00000161892 | vdra               | -0.26830787  | -0.422747599 | -0.12129137  | -0.077310915 |
| ENSDART00000161906 | vwa11              | 1.529478256  | 0.755786632  | 0.896680083  | 0.546980022  |
| ENSDART00000161908 | nsun2              | 4.199768382  | 2.926785137  | 4.095496425  | 2.988717061  |
| ENSDART00000161925 | rundc3aa           | -0.101671945 | 0.461428265  | 0.452450402  | 0.467812596  |
| ENSDART00000161930 | strn4              | -0.158687938 | -0.097490818 | 0.286103327  | 0.194201646  |
| ENSDART00000161932 | npr3               | 0.255355781  | 0.183557252  | -0.357151542 | -1.063769364 |
| ENSDART00000161938 | si:dkeyp-9d4.3     | -0.230392301 | -0.461066854 | -0.432261332 | -0.276495229 |
| ENSDART00000161967 | ctsc               | 1.279775059  | 0.583635254  | 0.329059668  | -0.157215155 |
| ENSDART00000161978 | BX649556.1         | 0.438096957  | 0.234757098  | 0.251734491  | 0.204407619  |
| ENSDART00000161982 | SCARNA6            | 0.10205479   | -0.170611192 | -0.840119974 | -1.131956342 |
| ENSDART00000161992 | PAQR9              | -0.193753966 | -0.524789375 | -0.118624882 | 0.042415903  |
| ENSDART00000162002 | grm1b              | -0.568603213 | -0.750999293 | -0.21404532  | -0.094504234 |

|                    |                   |              |              |              |              |
|--------------------|-------------------|--------------|--------------|--------------|--------------|
| ENSDART00000162007 | Metazoa_SRP       | 0.903949119  | 2.303055473  | 1.702580761  | 0.513671528  |
| ENSDART00000162010 | zgc:92140         | -0.256831407 | -0.245054913 | -0.345912399 | -0.346929099 |
| ENSDART00000162018 | CABZ01002768.2    | 0.265184254  | 0.128771486  | 0.086197325  | 0.254354536  |
| ENSDART00000162023 | plppr2a           | 0.019417247  | -0.576626688 | 0.082766084  | 0.317388761  |
| ENSDART00000162026 | ninl              | -0.053184172 | -0.137296281 | -0.336798097 | -0.200288689 |
| ENSDART00000162046 | sez6a             | -0.383252568 | -0.442703172 | -0.383098336 | -0.145401001 |
| ENSDART00000162055 | mark1             | -0.053725407 | 0.099849875  | 0.364172927  | 0.499618468  |
| ENSDART00000162063 | ppifb             | -0.192515925 | -0.861096392 | -0.286677305 | -0.512048401 |
| ENSDART00000162070 | tmem9             | -0.208225931 | -0.361514875 | -0.511868133 | -0.393713678 |
| ENSDART00000162097 | CABZ01044157.1    | 1.031550352  | 0.670727071  | 0.212982548  | -0.249292553 |
| ENSDART00000162119 | ewsr1a            | -3.071838226 | 0.182908872  | -0.16348899  | 0.256173861  |
| ENSDART00000162133 | tenm4             | -0.287462387 | -0.412164757 | -0.184969779 | 0.049525758  |
| ENSDART00000162139 | si:ch211-244c8.4  | -0.176471944 | 0.210261822  | 0.365856922  | 0.312900704  |
| ENSDART00000162145 | FQ377629.1        | -0.12898611  | -0.128745299 | 0.191405016  | 0.357155255  |
| ENSDART00000162200 | STX3 (1 of many)  | -0.155323726 | -0.36938348  | -0.41294698  | -0.132327196 |
| ENSDART00000162218 | col10a1b          | 0.45003474   | 2.713575183  | 3.448261467  | 1.87125716   |
| ENSDART00000162222 | SHC3              | -0.255397657 | -0.359792108 | -0.178043549 | -0.323533675 |
| ENSDART00000162228 | grip2a            | -0.209580983 | -0.468643062 | -0.36247099  | -0.147880595 |
| ENSDART00000162277 | grip1             | -0.456620328 | -0.2169797   | 0.146006741  | 0.157130316  |
| ENSDART00000162278 | CABZ01053748.1    | -0.203505904 | -0.497916501 | -0.162237791 | 0.002359168  |
| ENSDART00000162282 | dicp3.1           | 0.839763954  | 0.379787637  | 0.004488715  | -0.034973807 |
| ENSDART00000162290 | GARNL3            | 0.087177538  | 0.188445106  | 0.266999217  | 0.231469459  |
| ENSDART00000162294 | utrnl             | -0.256734894 | -0.284908669 | -0.969336134 | -0.369539596 |
| ENSDART00000162296 | cfp               | 0.329536618  | 0.225136408  | -0.193120136 | -0.891420593 |
| ENSDART00000162302 | bnip3             | -0.278521269 | -0.244198471 | -0.204837653 | -0.079960627 |
| ENSDART00000162324 | kalrnb            | -0.363230198 | -0.20882241  | 0.367737091  | 0.490925401  |
| ENSDART00000162331 | si:dkey-22o22.2   | -0.434953721 | -0.633123757 | -0.287732073 | -0.108064019 |
| ENSDART00000162359 | sorbs1            | -0.104497249 | -0.20837462  | -0.418151878 | -0.317718588 |
| ENSDART00000162377 | FP085414.1        | 0.809712454  | 1.275862162  | 1.389373351  | 0.791945088  |
| ENSDART00000162381 | dkk3a             | -0.551126502 | -0.361561955 | -0.324385943 | 0.074151181  |
| ENSDART00000162387 | zbtb38            | -0.362042869 | -0.285747988 | -0.199364681 | -0.27814593  |
| ENSDART00000162399 | tacc3             | 1.052644038  | 0.862999188  | 0.469743238  | -0.177095944 |
| ENSDART00000162403 | napgb             | -0.42647327  | -0.557407706 | -0.383093342 | -0.343712014 |
| ENSDART00000162421 | si:ch73-233f7.7   | 0.22834555   | 0.078820055  | 0.428518248  | 0.477794315  |
| ENSDART00000162459 | scarb2a           | 0.204566318  | 0.711810949  | 0.821282796  | 0.534817262  |
| ENSDART00000162472 | VWA5A (1 of many) | 0.543940251  | 0.262980075  | 0.410699646  | -0.136546959 |
| ENSDART00000162474 | irx1a             | -1.132797992 | -0.349993381 | 0.581252213  | 0.55366573   |
| ENSDART00000162482 | zgc:152863        | 0.539805357  | 0.660295595  | 0.432850415  | 0.095615261  |
| ENSDART00000162485 | pax6a             | -0.383059238 | -0.321515523 | -0.107334897 | 0.077147684  |
| ENSDART00000162493 | kif5ab            | -0.358862317 | -0.407894033 | -0.585721315 | -0.34361757  |
| ENSDART00000162501 | abca4a            | -0.194244085 | -0.198091298 | -0.350966144 | -0.228681741 |
| ENSDART00000162520 | SHC3              | -0.325188551 | -0.499304719 | 0.001359259  | -0.194280026 |
| ENSDART00000162527 | si:ch211-160f23.7 | -0.331311011 | -0.409364601 | -0.344819459 | -0.114250304 |
| ENSDART00000162529 | zgc:172139        | 0.398363371  | 0.414482162  | 0.745277151  | 0.505205904  |
| ENSDART00000162539 | VWA5A (1 of many) | 1.505543925  | 2.134948516  | 2.442684472  | 2.675816303  |
| ENSDART00000162540 | Metazoa_SRP       | 1.640394936  | 1.730362994  | 1.214251464  | 0.854214156  |
| ENSDART00000162541 | thbs4a            | 1.94439423   | 3.279546426  | 3.089397424  | 2.286354886  |
| ENSDART00000162555 | dpyda.1           | 0.585872258  | 0.381337517  | 0.027895003  | -0.679828257 |
| ENSDART00000162564 | CT027980.1        | -0.351165538 | -0.178285414 | -0.533647461 | -0.500417084 |
| ENSDART00000162566 | h2afvb            | 0.462673668  | 0.293160887  | 0.459514152  | 0.229847552  |
| ENSDART00000162587 | chd5              | -0.534129477 | -1.024077887 | -0.70517204  | -0.958580386 |

|                    |                    |              |              |              |              |
|--------------------|--------------------|--------------|--------------|--------------|--------------|
| ENSDART00000162595 | camk2g1            | -0.045798893 | -0.36296086  | -0.180481912 | 0.032536235  |
| ENSDART00000162601 | scn2b              | -0.529498392 | -0.64570335  | -0.359290818 | 0.039638437  |
| ENSDART00000162607 | CR361561.2         | 0.410555114  | 0.246904987  | 0.207590099  | 0.517188645  |
| ENSDART00000162617 | ppp2cb             | 0.050413288  | 0.287682373  | 0.42325509   | 0.191699941  |
| ENSDART00000162622 | FP103009.1         | -0.352224047 | -0.048475545 | 0.149997583  | 0.073530546  |
| ENSDART00000162637 | CABZ01054392.2     | -0.811315315 | 0.030869752  | -0.070916412 | -0.071296331 |
| ENSDART00000162664 | 5S_rRNA            | -0.438943374 | -1.186726175 | -0.920371372 | -0.548334869 |
| ENSDART00000162668 | cremb              | 4.310209888  | 4.052771     | 3.333577791  | 2.240090056  |
| ENSDART00000162669 | slc4a5             | -0.13383932  | -0.22542524  | -0.430682825 | -0.287279235 |
| ENSDART00000162670 | slc8a1b            | -0.269852688 | -0.529256481 | -0.096682296 | 0.048355338  |
| ENSDART00000162675 | trim2b             | -0.409757052 | -0.631223683 | -0.07653124  | 0.093922127  |
| ENSDART00000162683 | trappc9            | -0.370182614 | -0.24071592  | -0.273499446 | -0.133452933 |
| ENSDART00000162696 | cacnb4b            | -0.474781259 | -0.004559691 | 0.081636688  | 0.060425945  |
| ENSDART00000162710 | fgf13b             | 0.123584158  | 0.587591002  | 0.690906211  | 0.488537905  |
| ENSDART00000162711 | cnksr2b            | -0.20949159  | -0.28214605  | -0.418907028 | -0.082150791 |
| ENSDART00000162714 | pcdh10b            | -0.340908137 | -0.430434424 | -0.069086695 | 0.178421467  |
| ENSDART00000162722 | zgc:153867         | 0.467799327  | 0.468299246  | 0.579069745  | 0.022677056  |
| ENSDART00000162732 |                    | -0.497798966 | -0.517625334 | -0.441909965 | -0.132483146 |
| ENSDART00000162761 | CU984600.2         | 0.225517614  | -0.442281881 | 2.62985535   | 0.023562363  |
| ENSDART00000162799 | crb3a              | 0.362169262  | 0.040586113  | -0.086039525 | -0.014272311 |
| ENSDART00000162804 | KCNT1 (1 of many)  | -0.406408577 | -0.48233323  | -0.378259831 | 0.110845983  |
| ENSDART00000162827 | si:dkey-92j12.5    | -0.013228451 | -0.265522895 | -0.385437174 | -0.080127062 |
| ENSDART00000162838 | agnr               | 0.183430669  | 0.084636207  | 0.451853257  | 0.572854924  |
| ENSDART00000162850 | irx3a              | -0.694816328 | -0.301932125 | 0.187764734  | 0.208405543  |
| ENSDART00000162855 | pcdh1g13           | 0.288424517  | 0.288939089  | 0.455966507  | 0.614698967  |
| ENSDART00000162857 | nr4a3              | -1.482016444 | -1.152680943 | -0.606031454 | -1.193862677 |
| ENSDART00000162858 | lmbd1              | -0.243655467 | -0.23291492  | -0.332336473 | -0.114530821 |
| ENSDART00000162868 | PCMTD2 (1 of many) | -0.184710465 | -0.224010966 | -0.277853434 | -0.160151685 |
| ENSDART00000162875 | rogdi              | -0.224891588 | -0.27706391  | -0.36191309  | -0.159630193 |
| ENSDART00000162886 | il1rapl1b          | -0.535131005 | -0.60836138  | -0.536159373 | -0.086785386 |
| ENSDART00000162897 | Metazoa_SRP        | 1.178659737  | 1.5924133    | 1.384383775  | 1.197556527  |
| ENSDART00000162915 | dclk2b             | 0.022821815  | 0.633802822  | 1.144009661  | 0.962163073  |
| ENSDART00000162916 | si:ch211-177d9.1   | -0.561077771 | -0.777629972 | -0.458457407 | -0.043076344 |
| ENSDART00000162924 | SCARNA2            | -0.051299469 | -0.033570311 | -0.355924265 | -0.225455165 |
| ENSDART00000162940 | mob2b              | 0.020755037  | -0.2829937   | -0.541864256 | -0.204837959 |
| ENSDART00000162958 | si:ch211-260e23.9  | 0.345171245  | 0.431307401  | 0.079575678  | 0.236719343  |
| ENSDART00000162970 | znf1001            | 2.835681681  | 3.195296273  | 3.608291375  | 4.001715823  |
| ENSDART00000162984 | cacnb2a            | -0.567328475 | -0.858575333 | 0.120461387  | 0.550245867  |
| ENSDART00000163006 | magi1b             | -0.558734199 | -0.633598853 | 0.045195354  | 0.572492467  |
| ENSDART00000163018 | bet1l              | 0.723011674  | 0.444641169  | 0.411413339  | 0.530095318  |
| ENSDART00000163023 | sypb               | -0.076679322 | -0.067070783 | -0.475180992 | -0.188875227 |
| ENSDART00000163025 | slc37a1            | 0.146947624  | 0.663221495  | 0.752146696  | 0.093340063  |
| ENSDART00000163026 | igf2bp3            | 1.596757122  | 2.364080903  | 3.304264113  | 3.343316319  |
| ENSDART00000163032 | Metazoa_SRP        | 1.221075219  | 2.596056056  | 2.04902232   | 1.755997125  |
| ENSDART00000163039 | fgfr1b             | -0.263701101 | -0.339844216 | -0.261709078 | -0.264179912 |
| ENSDART00000163042 | si:dkey-16p6.2     | 0.770521119  | 0.592959463  | 0.681550899  | 0.554585181  |
| ENSDART00000163057 | FP101882.1         | -0.031169748 | -0.097998763 | -0.346688618 | -0.474056029 |
| ENSDART00000163075 | zgc:173552         | 0.365012264  | 0.677919016  | 1.138040868  | 0.74357363   |
| ENSDART00000163077 | pcdh1g22           | -0.379602696 | -0.085601773 | 0.347287318  | 0.30809701   |
| ENSDART00000163089 | BX649411.2         | 0.422281392  | 0.001934371  | -0.524390062 | -0.335409314 |
| ENSDART00000163093 | lrp12              | -0.07747456  | -0.233717712 | -0.371900586 | -0.129203418 |

|                    |                    |              |              |              |              |
|--------------------|--------------------|--------------|--------------|--------------|--------------|
| ENSDART00000163096 | gpr22b             | -1.106969479 | -1.366483735 | -0.599957035 | 0.051341663  |
| ENSDART00000163106 | cntnap5l           | -0.230959418 | -0.661142608 | -0.469168415 | -0.076363144 |
| ENSDART00000163132 | rab11fip5a         | -0.667316443 | -0.571914956 | -0.021672662 | 0.188839381  |
| ENSDART00000163137 | elovl1a            | 1.359201374  | 2.32562135   | 1.99000125   | 0.940099891  |
| ENSDART00000163149 | slco1e1            | 0.176388599  | 0.147707318  | -0.389938785 | -1.215116068 |
| ENSDART00000163174 | si:ch73-42p12.2    | 0.635401366  | 0.972834844  | 0.669544171  | 0.150769788  |
| ENSDART00000163182 | tpm2               | -0.110471418 | -0.35380494  | -0.587423123 | -0.759315105 |
| ENSDART00000163216 | prune2             | -0.414992243 | -0.329741076 | -0.094156508 | 0.003976732  |
| ENSDART00000163238 | stom               | -0.421228902 | -0.189947439 | -0.023059486 | -0.114725703 |
| ENSDART00000163243 | dpysl4             | 0.526851432  | 0.969802663  | 1.139409914  | 0.808513895  |
| ENSDART00000163250 | mef2cb             | 0.361224616  | -0.300957895 | -0.57227951  | -0.080214844 |
| ENSDART00000163305 | fyxd6l             | -0.209100518 | -0.188713869 | -0.620315584 | -0.44198331  |
| ENSDART00000163310 | exosc4             | -1.250232551 | -1.071141483 | -0.30340673  | -0.290327378 |
| ENSDART00000163327 | rpl36              | 0.36660589   | 0.401460063  | 0.099733249  | -0.024083137 |
| ENSDART00000163337 | wu:fj30f06         | 0.562927267  | 0.339612631  | 0.922878619  | 0.481097928  |
| ENSDART00000163352 | impg2b             | -0.050961847 | -0.309849144 | -0.745225088 | -0.302394708 |
| ENSDART00000163353 | lrp2a              | -0.727729459 | -1.488145344 | -2.965914229 | -0.433516037 |
| ENSDART00000163355 | gria2a             | -0.37007276  | -0.57694131  | -0.293854127 | 0.240567837  |
| ENSDART00000163367 | TFR2               | 0.892525381  | 1.842645951  | 2.060867557  | 1.063290775  |
| ENSDART00000163370 | si:rp71-36a1.2     | 0.777729217  | 1.232972386  | 1.065047677  | 0.579071639  |
| ENSDART00000163380 | si:dkey-22o22.2    | -0.500713087 | -0.482673389 | -0.426086075 | -0.212897339 |
| ENSDART00000163391 | si:ch211-149k12.3  | 0.507081525  | 0.32718269   | 0.316220639  | 0.200966933  |
| ENSDART00000163394 | dgke               | -0.154264184 | -0.257555682 | -0.346312178 | -0.3002364   |
| ENSDART00000163398 | pla2g15            | 0.617752366  | 0.443695085  | 0.159097428  | 0.08811481   |
| ENSDART00000163407 | slc20a1a           | 0.970510209  | 0.576996952  | 0.406775549  | -0.419444699 |
| ENSDART00000163441 | limk1a             | 1.134897491  | 0.940120128  | 1.036684953  | 0.715200814  |
| ENSDART00000163445 | zgc:109982         | 0.178949347  | -0.334063834 | -0.837985378 | -0.307869575 |
| ENSDART00000163463 |                    | 0.439033688  | 0.673311945  | 0.275086265  | 0.11827711   |
| ENSDART00000163491 | reep6              | -1.146193953 | -0.500723418 | -0.964434532 | -0.007386228 |
| ENSDART00000163516 | BX927374.1         | -0.474896067 | -0.084073015 | -0.358098021 | -0.301541481 |
| ENSDART00000163519 | CABZ01050166.1     | -0.484053035 | -0.532447227 | -0.143157501 | 0.191505756  |
| ENSDART00000163521 | si:ch1073-83n3.2   | -0.135028227 | -0.352956778 | -0.389044273 | -0.105210001 |
| ENSDART00000163523 | sez6l              | -0.314616095 | -0.257996779 | -0.399166894 | -0.159678617 |
| ENSDART00000163526 | mansc1             | 0.060022776  | 0.316271416  | 0.600176682  | 0.64715281   |
| ENSDART00000163529 | FAM126B            | -0.519426512 | -0.370293712 | 0.022402011  | 0.032038169  |
| ENSDART00000163531 | CU929294.1         | -0.283562448 | -0.225727022 | -0.174388489 | -0.430860144 |
| ENSDART00000163539 | scrt1a             | -0.576475687 | -0.187048661 | 0.063865515  | 0.398969662  |
| ENSDART00000163565 | plcl2              | -0.007453137 | -0.119106713 | -0.251934099 | -0.322673112 |
| ENSDART00000163568 | kcnc1a             | -0.672590813 | -0.97944076  | -0.78875743  | -0.1747006   |
| ENSDART00000163577 | fnbp1b             | 0.973038753  | 0.902992088  | 0.678793665  | 0.275094435  |
| ENSDART00000163582 | desi1b             | 0.334416001  | 0.338516182  | 0.11270838   | -0.034533924 |
| ENSDART00000163585 | csf1ra             | 0.499534778  | 0.258389647  | 0.175653195  | -0.286108065 |
| ENSDART00000163597 | CABZ01029366.1     | -0.380235128 | -0.253799187 | -0.219703335 | -0.156720283 |
| ENSDART00000163609 | mrps16             | -0.312251198 | -0.078513731 | -0.202471055 | -0.117952357 |
| ENSDART00000163612 | gabrb4             | -0.445185281 | -0.610684009 | -0.211332691 | 0.127493005  |
| ENSDART00000163616 | homer1b            | -0.487597805 | -0.239525084 | -0.239441952 | -0.083482271 |
| ENSDART00000163622 | kirrel3l           | -0.615947415 | -0.493751402 | -0.207879997 | 0.127527609  |
| ENSDART00000163635 | erbb4b             | -0.423431984 | -0.772483288 | -0.24962409  | 0.07826798   |
| ENSDART00000163656 | CAMK2N1            | -0.350066285 | -0.376343666 | -0.297112769 | 0.007693675  |
| ENSDART00000163668 | si:ch1073-392o20.2 | 0.543875349  | 0.345011244  | 0.082952674  | -0.090250505 |
| ENSDART00000163669 | cplx2              | -0.402497387 | -0.424820216 | -0.158797592 | 0.046498934  |



|                    |                   |              |              |              |              |
|--------------------|-------------------|--------------|--------------|--------------|--------------|
| ENSDART00000163677 |                   | -0.639905731 | -0.179601491 | 0.106036319  | 0.34272584   |
| ENSDART00000163680 | hmgcs1            | 0.250779539  | 0.717953967  | 2.106714123  | 1.525845318  |
| ENSDART00000163724 | SLA (1 of many)   | 1.207342807  | 0.416124608  | 0.383103847  | 0.193096581  |
| ENSDART00000163728 | dlg1l             | -0.038220111 | -0.173015233 | -0.306246457 | -0.06107777  |
| ENSDART00000163741 | pwwp2b            | 0.088274726  | 0.335331052  | 0.428666425  | 0.318380002  |
| ENSDART00000163753 | kcnc2             | -0.67860628  | -0.849972581 | -0.373023023 | -0.287955655 |
| ENSDART00000163791 | acss2l            | -0.694063426 | -0.500876422 | -0.115488475 | -0.045115535 |
| ENSDART00000163793 | slitrk6           | -0.404346501 | -0.384982132 | -0.24261489  | -0.144542921 |
| ENSDART00000163794 | wt1b              | 0.454982734  | 0.330694147  | 0.317167947  | 0.300420298  |
| ENSDART00000163822 | glula             | 0.714593131  | 0.414537751  | 0.09156337   | 0.359301323  |
| ENSDART00000163867 | gnb1b             | -0.511340157 | -0.236747213 | 0.117718298  | 0.111335872  |
| ENSDART00000163870 | si:dkey-51d8.3    | 0.628993426  | 0.565032034  | 0.497692882  | 0.102165836  |
| ENSDART00000163882 | si:zfos-932h1.2   | 0.498808647  | 0.465594286  | 0.502820055  | 0.062918681  |
| ENSDART00000163892 | ldha              | -0.444310122 | -0.296598203 | -0.299673411 | -0.138453042 |
| ENSDART00000163897 | lgi1b             | -0.358188713 | -0.274223364 | -0.009680681 | 0.361584537  |
| ENSDART00000163903 | kcna2b            | -1.041609083 | -1.150732339 | -0.278604653 | 0.240702332  |
| ENSDART00000163908 | rnasekb           | -0.236636314 | -0.265732137 | -0.418465587 | -0.246757364 |
| ENSDART00000163909 | sepw1             | 1.561335076  | 4.635912393  | 4.23829642   | 2.739511684  |
| ENSDART00000163930 | znfx1             | 0.194042843  | 0.097168789  | 1.523223234  | 0.201252376  |
| ENSDART00000163935 | med30             | -0.198525489 | -0.227576976 | -0.505162548 | -0.348410732 |
| ENSDART00000163951 | plppr1            | -0.393500272 | -0.316896098 | -0.148613826 | 0.078198855  |
| ENSDART00000163952 | zgc:110045        | -0.36736834  | -0.55642828  | -0.201308362 | -0.286026212 |
| ENSDART00000163965 | brdt              | -0.081678017 | -0.160102967 | -0.300823041 | -0.066034281 |
| ENSDART00000163976 | CABZ01069287.1    | 0.247964945  | -0.272161916 | -0.664208233 | -0.362164102 |
| ENSDART00000163998 | rps6ka3a          | 0.01131102   | -0.11493059  | -0.372925255 | -0.200625555 |
| ENSDART00000164015 | zgc:66483         | -0.233929761 | -0.339147918 | -0.342271085 | -0.145997916 |
| ENSDART00000164016 | kif16ba           | 0.136253596  | 0.020087235  | 0.515201001  | 0.413972136  |
| ENSDART00000164038 | SAMD14            | -0.096477793 | 0.217514922  | 0.565397199  | 0.769428937  |
| ENSDART00000164044 | CR339041.2        | 1.41667761   | 2.386461772  | 3.081137029  | 2.622909743  |
| ENSDART00000164055 | cap2              | 0.292123593  | 0.450008213  | 0.705800498  | 0.580755871  |
| ENSDART00000164067 | coq4              | -0.217054082 | -0.203935963 | -0.344175456 | -0.073829043 |
| ENSDART00000164086 | slc25a42          | -0.002109364 | -0.020496378 | -0.265228332 | -0.112125599 |
| ENSDART00000164095 | scpp8             | 1.980889265  | 1.287952222  | 0.276966611  | -1.560257402 |
| ENSDART00000164097 | DRAP1 (1 of many) | -0.372264093 | -0.35663103  | -0.955802153 | -1.03240984  |
| ENSDART00000164102 | cirbpa            | 0.225987764  | 0.314210398  | 0.241597292  | 0.01082888   |
| ENSDART00000164107 | mex3b             | 2.977404608  | 3.048404514  | 3.190626187  | 2.69620274   |
| ENSDART00000164112 | si:dkey-191g9.7   | -0.2514272   | -0.278147864 | -0.225636717 | -0.211416033 |
| ENSDART00000164113 | cpeb1a            | 1.336706075  | 1.190402311  | 1.006023313  | 0.300918459  |
| ENSDART00000164114 | grb2a             | -0.50918281  | -0.254702947 | 0.293231191  | 0.639895729  |
| ENSDART00000164121 | mboat2b           | -0.365653488 | -0.229675996 | -0.118902893 | -0.108744854 |
| ENSDART00000164129 | asic4b            | -0.92148029  | -1.144921239 | -0.577321683 | -0.304835302 |
| ENSDART00000164139 | nhsb              | -0.370661862 | -0.378323584 | -0.044398497 | -0.049874132 |
| ENSDART00000164141 | dmd               | -0.285273333 | -3.746442585 | -0.310755288 | -0.137191678 |
| ENSDART00000164149 | si:ch211-272n13.3 | -0.267513209 | -0.389121708 | -0.597494594 | -0.154083189 |
| ENSDART00000164160 | acss1             | 0.721950379  | 0.415946373  | -0.236554542 | -0.337079704 |
| ENSDART00000164161 | osbp1a            | 0.351337908  | 0.311134875  | -0.016374257 | -0.257205353 |
| ENSDART00000164163 | si:dkey-202l22.3  | -0.676171429 | -1.127391316 | 0.216542828  | 0.638796234  |
| ENSDART00000164175 | si:dkey-19c16.12  | 0.421774029  | 0.293774627  | 0.297672563  | 0.254989754  |
| ENSDART00000164178 | prrt2             | -0.547052118 | -0.283537507 | 0.297793332  | 0.499767197  |
| ENSDART00000164190 | ksr2              | -0.449890716 | -0.587945856 | -0.131638865 | 0.158651331  |
| ENSDART00000164198 | si:dkey-102m7.3   | 0.949739085  | 1.411170301  | 0.641678924  | 0.378323778  |

|                    |                    |              |              |              |              |
|--------------------|--------------------|--------------|--------------|--------------|--------------|
| ENSDART00000164204 | ubac2              | 3.978074982  | 4.357970342  | 4.255380594  | 4.157698498  |
| ENSDART00000164207 | impdh2             | 0.582365155  | 0.675083436  | 1.006708284  | 0.417204588  |
| ENSDART00000164210 | Sl                 | 1.002064064  | 1.522108486  | 0.992417222  | 0.446482404  |
| ENSDART00000164218 | AKAP13 (1 of many) | 0.310415201  | 0.00930034   | -0.071769787 | 0.052155489  |
| ENSDART00000164282 | si:zfos-1011f11.1  | 1.204368625  | 1.598509532  | 2.613199623  | 1.667018794  |
| ENSDART00000164298 | RNF122             | 0.037145597  | 0.153249015  | 0.432199178  | 0.405886045  |
| ENSDART00000164305 | dicp1.1            | 0.970381914  | 0.35730766   | 0.127672979  | 0.007978514  |
| ENSDART00000164311 | mfsd2aa            | 0.188250738  | 0.92622451   | 1.277563791  | 0.357720797  |
| ENSDART00000164326 | si:ch73-119p20.1   | -0.36329758  | -0.388299747 | 0.050179382  | 0.305653209  |
| ENSDART00000164328 | mical3b            | 0.181716224  | -0.808395946 | -0.697708655 | -4.388355255 |
| ENSDART00000164353 | lsg1               | 0.428728295  | -3.620309582 | -3.671353201 | -0.354626047 |
| ENSDART00000164359 | rpl24              | 0.373088629  | 0.328659722  | 0.253068013  | 0.037812576  |
| ENSDART00000164361 | gcgra              | -0.404304946 | -0.520606663 | -0.179928762 | -0.009148827 |
| ENSDART00000164390 | chmp1a             | 0.019722961  | 0.342209851  | 0.202368709  | 0.087357775  |
| ENSDART00000164392 | lrrc20             | 0.934799406  | 1.852088866  | 1.534338919  | 1.07983234   |
| ENSDART00000164440 | si:ch211-195b11.3  | 0.887240489  | 0.373309939  | 0.100891486  | -0.191092546 |
| ENSDART00000164454 | plbd1              | 0.523653463  | 0.489772378  | 0.050282092  | -0.147404491 |
| ENSDART00000164456 | fr50               | 0.637566129  | 0.360052404  | 0.566672785  | 0.193605767  |
| ENSDART00000164471 | CABZ01084230.2     | 0.442580477  | 0.587031258  | 0.401618345  | 0.289449509  |
| ENSDART00000164473 | MAP7               | -0.064645672 | -0.140135551 | -0.331730838 | -0.206670905 |
| ENSDART00000164484 | dtnba              | 0.785988532  | 0.671033087  | 0.445356623  | 0.140878127  |
| ENSDART00000164506 | dlg1l              | -0.401430092 | -0.615035177 | -0.528577315 | -0.282785588 |
| ENSDART00000164543 | kalrna             | 0.833553496  | 1.079150473  | 0.963779963  | 0.661385395  |
| ENSDART00000164563 | elmo1              | -0.350954029 | -0.242629157 | -0.047540163 | 0.212201861  |
| ENSDART00000164566 | akt3a              | 0.045255643  | -0.432188612 | -0.498284714 | -0.321504061 |
| ENSDART00000164581 | galr2b             | -0.842297369 | -0.875318855 | -0.561173438 | -0.495794792 |
| ENSDART00000164585 | mvda               | -0.034972011 | 1.767545823  | 1.673143467  | 0.929274175  |
| ENSDART00000164597 | si:ch73-127m5.1    | -0.712165198 | -0.239448184 | 0.59846121   | 0.690834997  |
| ENSDART00000164609 | si:ch211-126j24.1  | -0.283466546 | -0.277532239 | -0.146779223 | -0.04114819  |
| ENSDART00000164612 | MYH7 (1 of many)   | 0.128311883  | 3.589180748  | 4.208970977  | 3.051349831  |
| ENSDART00000164621 | ndrg4              | -0.368994826 | -0.243279912 | -0.209623349 | -0.144971204 |
| ENSDART00000164623 | ptn                | -0.285740219 | -0.301123559 | -0.395585979 | -0.169574914 |
| ENSDART00000164647 | slc12a2            | -0.231168401 | 0.356367716  | 0.84043135   | 0.654792579  |
| ENSDART00000164650 | pdk3b              | -0.133813888 | -0.219494437 | -0.474289524 | -0.225858079 |
| ENSDART00000164653 | chl1b              | 0.395134275  | 0.182602935  | 0.205655131  | 0.15670367   |
| ENSDART00000164658 | si:ch211-225h24.2  | 0.868137568  | 0.716622061  | 0.306228611  | -0.52736976  |
| ENSDART00000164663 | aclya              | -0.268277102 | 0.066826112  | 0.215179278  | 0.06328981   |
| ENSDART00000164670 | frem2b             | -0.279819948 | -0.158818402 | -0.300273376 | -0.936234223 |
| ENSDART00000164692 | dctn4              | -0.108443255 | 0.034030376  | 0.494831818  | 0.293587926  |
| ENSDART00000164693 | CT583672.1         | -0.40975231  | -0.465896033 | -0.295925202 | -0.161007007 |
| ENSDART00000164695 | ar13l1             | -0.208201897 | -0.292220291 | -0.610724074 | -0.376046469 |
| ENSDART00000164700 | sptbn1             | -0.093232375 | 0.007130054  | 0.336225009  | 0.189868537  |
| ENSDART00000164711 | NFATC2 (1 of many) | 0.774520656  | 0.760515741  | 0.734404519  | 0.027133082  |
| ENSDART00000164712 | cobll1b            | -0.06356256  | -0.113578182 | -0.259720894 | -0.442027325 |
| ENSDART00000164726 | si:dkey-200c24.1   | -0.33778778  | -0.588766562 | -0.504539854 | -0.492073189 |
| ENSDART00000164729 | SBSPO              | -0.213183167 | -0.151008123 | -0.380923154 | -0.573582751 |
| ENSDART00000164733 | sept15             | -0.353566412 | -0.328984592 | -0.353599969 | -0.269459941 |
| ENSDART00000164759 | cntn4              | -0.356168225 | -0.879631419 | -0.511604399 | -0.608850913 |
| ENSDART00000164771 | ppfibp1a           | 0.181979482  | 0.06403475   | 0.045243081  | -0.766863631 |
| ENSDART00000164773 | CABZ01072036.1     | -0.106672866 | -0.494009284 | -0.613761036 | -0.476277849 |
| ENSDART00000164791 | fkbp3              | -0.300438451 | -0.231059822 | -0.287267966 | -0.464270989 |

|                    |                      |              |              |              |              |
|--------------------|----------------------|--------------|--------------|--------------|--------------|
| ENSDART00000164792 | cfap74               | -0.15899724  | -0.307564837 | -0.482816939 | -0.375147114 |
| ENSDART00000164805 | camk2b2              | -1.031859946 | -0.873779607 | -0.527330652 | -0.617230087 |
| ENSDART00000164809 | si:ch73-233f7.5      | 0.260792098  | 0.492638431  | 0.828767158  | 0.768289306  |
| ENSDART00000164810 | ano2                 | 0.191725223  | -0.262322186 | -0.177000117 | -0.045593369 |
| ENSDART00000164816 | cnr1                 | 0.971414159  | 0.97686046   | 0.907214473  | -0.258209562 |
| ENSDART00000164844 | rictora              | -0.308713132 | -0.348726405 | -0.242009414 | -0.189747444 |
| ENSDART00000164853 | cnp                  | 1.119904973  | 1.074260191  | 2.53120974   | 1.692544703  |
| ENSDART00000164855 | crebl2               | -0.127345071 | -0.2122205   | -0.432997567 | -0.264872881 |
| ENSDART00000164879 | slc8a2b              | -0.298961891 | -0.426517442 | -0.175774312 | 0.049460205  |
| ENSDART00000164890 | pxdc1a               | -0.553855303 | -0.268569574 | -0.515208528 | -0.163588555 |
| ENSDART00000164891 | trim25               | 1.17805401   | 1.473587562  | 2.17710407   | 1.406205223  |
| ENSDART00000164902 | ca9                  | 0.158296773  | 0.100302393  | -0.407653731 | -0.624825129 |
| ENSDART00000164904 | nrp1a                | 0.238338546  | 0.288203349  | 0.415887875  | 0.403021552  |
| ENSDART00000164928 | mab2111              | -0.236289538 | -0.264159199 | -0.014378888 | 0.140356353  |
| ENSDART00000164979 | ARHGAP44 (1 of many) | -0.298736282 | -0.611440452 | -0.190082373 | -0.04950856  |
| ENSDART00000164982 | cdh4                 | -0.415355609 | -0.489911794 | 0.041403227  | 0.334639192  |
| ENSDART00000164983 | anapc15              | -0.036185378 | -0.198619926 | -0.408385072 | -0.233599439 |
| ENSDART00000164988 | bod111               | 0.085003082  | 0.094605568  | 0.323418829  | 0.18061312   |
| ENSDART00000164989 | si:ch211-121j5.4     | -2.541662275 | -0.597024815 | -0.157115726 | -0.615748868 |
| ENSDART00000165000 | zgc:136767           | 1.074177299  | 1.362099519  | 1.806009349  | 1.052151095  |
| ENSDART00000165002 | aqp11                | -0.052004039 | -0.030290396 | -0.282964979 | -0.265886582 |
| ENSDART00000165004 | gria3b               | -0.410652366 | -0.638891942 | -0.274205904 | 0.132979921  |
| ENSDART00000165006 | hpca                 | -0.709011759 | -0.754814005 | -0.136865422 | -0.15729929  |
| ENSDART00000165018 | cdc42se2             | -0.053295614 | -0.137825766 | -0.478383249 | -0.349419762 |
| ENSDART00000165021 | ndrg2                | -0.572041099 | -0.272188031 | 0.107233459  | 0.07090542   |
| ENSDART00000165030 | si:dkeyp-9d4.3       | -0.136094032 | -0.353586884 | -0.269174482 | -0.139574898 |
| ENSDART00000165031 | nr2f6b               | 0.621146984  | 0.406827879  | 0.54917158   | 0.373267529  |
| ENSDART00000165049 | imp2b                | -0.010489295 | -0.310856751 | -0.727501593 | -0.334825186 |
| ENSDART00000165058 | rims2a               | -0.759006031 | -0.607036719 | -0.257997898 | -0.111766909 |
| ENSDART00000165065 | uqcr10               | -0.222678585 | -0.318669731 | -0.412855116 | -0.201529958 |
| ENSDART00000165066 | eif2ak2              | 0.145136508  | 0.290335878  | 1.008511718  | 0.199274727  |
| ENSDART00000165082 | ppp1r1b              | -0.592550768 | -0.433249399 | 0.132918309  | 0.038849346  |
| ENSDART00000165097 | unm_sa1614           | -0.093711156 | -0.459181727 | -0.424406225 | -0.126303047 |
| ENSDART00000165108 | jph3                 | -0.254573235 | -0.426555215 | 0.040987467  | 0.08534723   |
| ENSDART00000165115 | adcy3a               | -0.345722559 | -0.440118918 | -0.380340005 | -0.11083624  |
| ENSDART00000165120 | purab                | -0.246648902 | -0.188751457 | -0.157104845 | -0.035763175 |
| ENSDART00000165124 | si:ch73-213k20.5     | -0.366310901 | -0.428402723 | -0.397554725 | -0.148030091 |
| ENSDART00000165141 | elavl4               | 1.008784658  | 0.753903544  | 1.037731482  | 0.21557706   |
| ENSDART00000165147 | MFSD3                | -0.380785464 | -0.635551022 | -0.165628582 | -0.053496107 |
| ENSDART00000165156 | sept15               | -0.316165192 | -0.356420975 | -0.295749689 | -0.213768729 |
| ENSDART00000165158 | iqsec3a              | -0.287263936 | -0.339420666 | -0.160997893 | 0.073213089  |
| ENSDART00000165159 | dscaml1              | -0.229621803 | -0.384977161 | -0.055090744 | 0.170582623  |
| ENSDART00000165186 | si:dkey-33i11.9      | 1.335261857  | 1.027980768  | 0.465372707  | 0.114592431  |
| ENSDART00000165195 | CU633762.1           | -0.318810448 | -0.187254152 | -0.150226726 | -0.009770113 |
| ENSDART00000165199 | mapre2               | 0.262487966  | 1.260089875  | 1.425017722  | 0.706527865  |
| ENSDART00000165201 | pacsin3              | -0.207834592 | -0.16294471  | -0.3385586   | -0.115392716 |
| ENSDART00000165207 | fam160a1b            | -0.089233769 | -0.189976289 | -0.269606776 | -0.116139265 |
| ENSDART00000165213 | caskb                | -0.0150989   | 0.201636443  | 0.432584514  | 0.386918381  |
| ENSDART00000165216 | dph5                 | 0.422816122  | 0.515360344  | 0.448987609  | 0.161864292  |
| ENSDART00000165223 | pbx1b                | -0.243991197 | -0.377373898 | -0.18693501  | 0.141565589  |
| ENSDART00000165225 | prkar1ab             | -0.220219796 | -0.315739009 | -0.190831632 | -0.05456146  |

|                    |                   |              |              |              |              |
|--------------------|-------------------|--------------|--------------|--------------|--------------|
| ENSDART00000165228 | kif5aa            | -0.119845449 | 0.354985416  | 0.468393446  | 0.466605496  |
| ENSDART00000165230 | map4k4            | -0.058109942 | 0.098582575  | 0.424133469  | 0.341075529  |
| ENSDART00000165290 | cyb5a             | 0.19405994   | 0.064877953  | -0.350823438 | -0.576368917 |
| ENSDART00000165292 | nsmfb             | -0.267190978 | -0.447188182 | -0.263868703 | -0.115307671 |
| ENSDART00000165308 | me2               | -0.16075229  | -0.327815721 | -0.451710296 | -0.323851706 |
| ENSDART00000165309 | pmt               | 1.560743592  | 2.051643174  | 1.965781873  | 1.006007351  |
| ENSDART00000165318 | thsd7bb           | -0.173014975 | 0.179455909  | 1.051340912  | 1.022924373  |
| ENSDART00000165326 | adgrl2a           | -0.346797592 | -1.122813298 | -2.2772027   | -0.600399475 |
| ENSDART00000165333 | si:ch211-207l14.1 | -0.144575592 | -0.337549275 | -0.714109722 | -0.444634079 |
| ENSDART00000165342 | si:ch211-93f2.1   | -0.158550393 | 0.117683559  | -0.256320731 | -0.510696237 |
| ENSDART00000165370 | nxph2b            | -0.350612818 | -0.344729721 | -0.406615862 | -0.05363573  |
| ENSDART00000165400 | slc1a2b           | -0.437547383 | -0.373563248 | -0.176045295 | -0.026222695 |
| ENSDART00000165411 |                   | -0.599585032 | -0.699498667 | -0.398460986 | -0.09881633  |
| ENSDART00000165420 | si:dkey-161j23.5  | -0.418752064 | -0.09080604  | 0.112517016  | 0.202865451  |
| ENSDART00000165423 | abcc8b            | -0.169557865 | -0.54863705  | -0.322687745 | -0.280461618 |
| ENSDART00000165425 | aak1a             | -0.009756971 | -0.269537246 | -0.43668389  | -0.03607957  |
| ENSDART00000165427 | myt1b             | 0.19969921   | 0.396205375  | 0.347986667  | 0.198976782  |
| ENSDART00000165433 | rgs2              | 0.779425284  | 0.385417705  | 0.555491331  | -0.186899017 |
| ENSDART00000165437 | si:dkey-26m3.3    | 0.220558358  | 0.221546162  | 0.282286139  | 0.194663631  |
| ENSDART00000165443 | zgc:153615        | -0.585165411 | -0.400257189 | -0.265863973 | -0.020005469 |
| ENSDART00000165448 | rims2b            | -0.321612136 | -0.490793078 | -0.295423658 | 0.030315799  |
| ENSDART00000165453 | epb41l3a          | -0.480811799 | 0.184033911  | 0.640683351  | 0.633983333  |
| ENSDART00000165454 | CU915762.1        | 0.350263787  | 0.108189136  | -0.057165889 | 0.160983657  |
| ENSDART00000165472 | snx2              | 0.34033168   | -0.040635813 | 0.394688984  | 0.105073801  |
| ENSDART00000165479 | has3              | 0.356722134  | 0.209377149  | 0.150402808  | 0.132473433  |
| ENSDART00000165484 | jpt1a             | 0.363755224  | 1.1796439    | 1.211655345  | 0.942198247  |
| ENSDART00000165486 | rps18             | 0.252319024  | 0.42379942   | 0.281645226  | -0.028370317 |
| ENSDART00000165491 | BX294383.1        | 0.352047768  | 0.065820831  | 0.027639622  | 0.019046581  |
| ENSDART00000165499 | rps17             | 0.504096498  | 0.637791027  | 0.385574489  | 0.024446186  |
| ENSDART00000165541 | map7d1b           | 0.274410575  | 0.322558005  | 0.501220001  | 0.438496507  |
| ENSDART00000165542 | si:dkeyp-72e1.9   | 0.115590472  | -0.201422352 | -0.774050016 | -0.351374892 |
| ENSDART00000165547 | CABZ01045062.1    | -0.214219167 | -0.28679968  | -0.112596272 | 0.066374108  |
| ENSDART00000165548 | ap2m1a            | -0.100883554 | -0.260493779 | -0.290981943 | -0.160008883 |
| ENSDART00000165557 | BX088524.3        | -0.275785171 | -0.331787981 | -0.469187171 | -0.127928431 |
| ENSDART00000165570 | rgs3a             | -0.252183908 | -0.25277418  | -0.390798302 | -0.347427277 |
| ENSDART00000165572 | zgc:162193        | 0.654407013  | 0.606984165  | 0.583589232  | 0.369009896  |
| ENSDART00000165594 | CT030188.1        | 0.949647945  | 1.541943795  | 1.047931527  | 0.898450066  |
| ENSDART00000165609 | barhl2            | -0.31272019  | -0.374018735 | 0.126371762  | 0.224852149  |
| ENSDART00000165628 | il4r.1            | 2.521820035  | 2.797213431  | 2.312532052  | 1.674117298  |
| ENSDART00000165638 | pax10             | -0.459647113 | -0.417992165 | -0.200180992 | -0.120970793 |
| ENSDART00000165654 | atp1b2a           | -0.572829136 | -0.493634763 | -0.065881564 | 0.075479325  |
| ENSDART00000165656 | mxtd3             | 0.030444632  | 0.928898979  | 1.014066924  | 0.787179484  |
| ENSDART00000165659 | epb41l3a          | -0.249067696 | -0.637410719 | -0.072556493 | -0.093775549 |
| ENSDART00000165680 | ntn4              | 0.240096357  | 0.070794746  | -0.41629651  | -0.558332982 |
| ENSDART00000165698 | pbx1a             | -0.205212048 | -0.330154536 | 0.047550564  | 0.321002436  |
| ENSDART00000165710 | gbbp1l1           | -0.164201122 | -0.182753901 | -0.290062625 | -0.125147623 |
| ENSDART00000165715 | BX284638.1        | 0.544886732  | 0.81514457   | 1.035521411  | 0.49952411   |
| ENSDART00000165735 | mdm4              | 0.677008086  | 0.457427602  | 0.365768719  | 0.56900659   |
| ENSDART00000165743 | gabrg2            | -0.320626657 | -0.470320689 | -0.258833602 | 0.01857369   |
| ENSDART00000165744 | kif1b             | -0.018685925 | -0.126032816 | 0.340319561  | 0.347744455  |
| ENSDART00000165757 | pax6b             | -1.030621281 | -0.736504391 | -0.510180699 | -0.112500923 |

|                    |                   |              |              |              |              |
|--------------------|-------------------|--------------|--------------|--------------|--------------|
| ENSDART00000165774 | pax6a             | -0.382942423 | -0.218376905 | 0.094924321  | 0.282463268  |
| ENSDART00000165775 | nlrc3             | 2.263794952  | 2.415644973  | 1.694313933  | 0.888951658  |
| ENSDART00000165785 | pcdh10a           | -0.2607204   | -0.385620436 | -0.040787194 | 0.144409091  |
| ENSDART00000165824 | setdb1b           | 0.086359323  | 0.217956862  | 0.320141564  | 0.188338727  |
| ENSDART00000165835 | ddx54             | 0.300757648  | 0.157122409  | 0.421066488  | 0.21493331   |
| ENSDART00000165864 | acox3             | -0.089913641 | -0.178492527 | -0.263049665 | -0.100985253 |
| ENSDART00000165875 | csnk1g1           | 0.004513388  | 0.131360351  | 0.256793811  | 0.293233915  |
| ENSDART00000165877 | purg              | -0.159238984 | -0.087175961 | 1.048436006  | 0.831059287  |
| ENSDART00000165883 | opn9              | -0.186957867 | -0.12243997  | -0.333236797 | -0.10321317  |
| ENSDART00000165887 | flvcr1            | -0.333518999 | -0.053749594 | 0.204875088  | 0.015969559  |
| ENSDART00000165898 | gbe1b             | -0.311269447 | -0.395300505 | -0.303280984 | -0.17462698  |
| ENSDART00000165903 | slmapa            | -5.974312545 | -3.688098031 | -4.583524263 | -0.943141088 |
| ENSDART00000165912 | si:ch73-380n15.2  | -0.521676191 | -0.515528635 | -0.335328887 | -0.345110245 |
| ENSDART00000165920 | nucb1             | 0.353439048  | 0.296422234  | 0.314532166  | -0.093049018 |
| ENSDART00000165932 | sik1              | 1.156253383  | 0.676084919  | 0.687880039  | 1.28219737   |
| ENSDART00000165938 | CU466240.1        | 0.428025361  | 0.165679287  | 0.139754855  | 0.298251046  |
| ENSDART00000165943 | fam102aa          | 0.068136883  | 0.160885629  | -0.464613828 | -0.136577362 |
| ENSDART00000165949 | fahd2a            | 0.346683888  | 0.20577135   | -0.135781443 | -0.151237654 |
| ENSDART00000165955 | zhx3              | -0.011624436 | -0.109014479 | 0.013312322  | 0.351264725  |
| ENSDART00000165973 | npnt              | -0.201530974 | -0.119421961 | -0.271951683 | -0.242671185 |
| ENSDART00000165974 | agla              | -0.253110547 | -0.164938699 | -0.089751197 | 0.189815825  |
| ENSDART00000165979 | sncgb             | -0.522103986 | -0.516181722 | -0.379782599 | -0.140861461 |
| ENSDART00000165987 | DST               | 0.207553536  | 0.19383587   | 0.337156934  | 0.233508941  |
| ENSDART00000165991 | lect1             | -3.06408831  | -0.430314435 | 0.807667083  | 0.659541685  |
| ENSDART00000165993 | f3a               | 1.175718098  | 1.946056838  | 1.259834727  | 0.15077318   |
| ENSDART00000166025 | irs2a             | -0.31567938  | -0.330763757 | -0.333387068 | -0.269837586 |
| ENSDART00000166027 | trpc1             | -0.303725684 | -0.42864481  | -0.334157939 | -0.231516525 |
| ENSDART00000166028 | mcf2la            | -0.298550829 | -0.194248433 | -0.224063256 | -0.02772208  |
| ENSDART00000166040 | sh3bp5b           | 0.359354612  | 1.105816025  | 1.101214783  | 0.69319763   |
| ENSDART00000166042 | vipr2             | -0.341756427 | -0.277003119 | -0.379732317 | -0.038627099 |
| ENSDART00000166058 | cmah              | 1.523029746  | 4.3199312    | 4.414697946  | 2.901009315  |
| ENSDART00000166086 | CABZ01055522.1    | -0.167914645 | -0.1533494   | -0.033990591 | 0.313482965  |
| ENSDART00000166101 | tlr22             | 0.744049575  | 0.528297207  | 0.210656038  | -0.353063092 |
| ENSDART00000166105 | frem1a            | -0.140882698 | -0.093532592 | -0.525495905 | -1.018483252 |
| ENSDART00000166110 | itga4             | 0.891623018  | 0.709388891  | 0.523610434  | -0.253853847 |
| ENSDART00000166114 | sema3ab           | -0.726704016 | -0.305486009 | -0.172433457 | -0.053903823 |
| ENSDART00000166120 | si:ch211-212d10.1 | 1.398436882  | 1.472487792  | 1.228480368  | 0.254562361  |
| ENSDART00000166135 | zbtb47b           | -0.402709337 | -0.409852132 | -0.474957603 | -0.394147628 |
| ENSDART00000166148 | gabra1            | -0.578656795 | -0.788703398 | -0.59715214  | -0.072809071 |
| ENSDART00000166152 | DAB2 (1 of many)  | 0.967097608  | 0.419929333  | 0.22593558   | -0.403858057 |
| ENSDART00000166174 | PARP12            | 0.236086028  | 0.041618587  | 1.350827793  | 0.15615804   |
| ENSDART00000166175 | zgc:171534        | 0.978558952  | 0.553291836  | 0.353063819  | -0.014246545 |
| ENSDART00000166177 | impq2b            | 0.006257085  | -0.447154942 | -0.735592553 | -0.255871486 |
| ENSDART00000166192 | pik3r5            | 0.977110656  | 0.482953861  | 0.341342874  | -0.116377345 |
| ENSDART00000166209 | wu:fb44b02        | 0.715207055  | 0.457109376  | 0.301906263  | -0.147536436 |
| ENSDART00000166213 | lcorl             | -0.114650844 | -0.153895276 | -0.40050268  | -0.037010303 |
| ENSDART00000166224 | smyhc2            | 1.194842223  | 5.367086788  | 6.852910143  | 4.718916943  |
| ENSDART00000166241 | inpp5b            | -0.146961161 | -0.217731387 | -0.46875304  | -0.117265313 |
| ENSDART00000166242 |                   | 0.20194611   | 0.241162188  | 0.512911525  | 0.246398136  |
| ENSDART00000166246 | ssuh2rs1          | 0.375757195  | 0.261052668  | 0.200946491  | -0.016238014 |
| ENSDART00000166254 | gpn2              | 0.085397213  | 0.349689217  | 0.008215986  | -0.050534057 |

|                    |                     |              |              |              |              |
|--------------------|---------------------|--------------|--------------|--------------|--------------|
| ENSDART00000166259 | wars                | 0.30804143   | 0.479087994  | 0.526413933  | 0.245904587  |
| ENSDART00000166268 | YTHDC2              | 0.015267861  | -0.127181664 | 0.395706164  | 0.317645369  |
| ENSDART00000166274 | phlda1              | -0.962333929 | -0.775569749 | 0.008452009  | 0.660576028  |
| ENSDART00000166308 | cib2                | -0.434731659 | -0.335262372 | -0.470437684 | -0.240772493 |
| ENSDART00000166313 | thrb                | -0.193382381 | -0.415286369 | -0.400030228 | -0.136855946 |
| ENSDART00000166317 | mtus1b              | -0.441732874 | -0.537161422 | 0.305687832  | 0.223661346  |
| ENSDART00000166324 | ctnnd1              | 0.460487451  | 0.641759187  | 1.004918197  | 0.346719852  |
| ENSDART00000166341 | AL954715.1          | 0.715525501  | 0.583886882  | 0.488572453  | 0.64332223   |
| ENSDART00000166351 | nkrf                | -0.332043429 | -0.213944917 | -0.117297764 | -0.03436019  |
| ENSDART00000166372 | si:ch211-222 21.1   | 0.890920299  | 0.959321743  | 0.886208086  | 0.413211736  |
| ENSDART00000166374 | si:dkey-31f5.11     | -0.246069029 | -0.257528931 | -0.445065012 | -0.224168767 |
| ENSDART00000166387 | prickle2a           | -0.236957906 | -0.307926948 | -0.968400315 | -0.433283323 |
| ENSDART00000166388 | il6st               | 0.326944598  | 0.248050944  | 0.233084281  | -0.066517896 |
| ENSDART00000166395 | fcer1gl             | 0.672549379  | 0.370716598  | -0.127334281 | -0.409142814 |
| ENSDART00000166432 | slc2a8              | 0.33290564   | 0.367124099  | 0.471066456  | 0.250147846  |
| ENSDART00000166435 | si:ch73-28h20.1     | -0.187153724 | -0.333881358 | -0.353210004 | -0.031764093 |
| ENSDART00000166449 | pik3r3a             | -0.698577911 | -0.3007013   | -0.248394691 | -0.547713549 |
| ENSDART00000166463 | cnot6b              | -0.099106983 | -0.163429858 | -0.300924183 | -0.105283807 |
| ENSDART00000166470 | CU855947.1          | -0.432778868 | -0.336734093 | -0.219445916 | -0.079633712 |
| ENSDART00000166496 | cat                 | 0.249947463  | 0.551180864  | 0.073389354  | -0.18327225  |
| ENSDART00000166502 | satb2               | -0.540440017 | -0.158642442 | 1.216799418  | 1.496340928  |
| ENSDART00000166504 | sod3b               | 1.107778201  | 3.874418447  | 1.285382343  | 3.248105088  |
| ENSDART00000166508 | fdft1               | -0.467410589 | -0.45021858  | 0.057865823  | -0.125768039 |
| ENSDART00000166515 | si:dkeyp-57d7.4     | -0.099733783 | -0.492859873 | -1.003446185 | -0.404973513 |
| ENSDART00000166518 | ptprfb              | 0.067979508  | -0.359782965 | 0.005118486  | 0.040886074  |
| ENSDART00000166527 | ftr87               | -0.180960216 | -0.104077306 | -0.471569991 | -0.343688512 |
| ENSDART00000166531 | pcdh15b             | -0.215971807 | -0.468745045 | -0.336826359 | 0.084344716  |
| ENSDART00000166533 | zgc:123181          | -0.682536387 | -0.078871471 | 0.212564109  | 0.407498801  |
| ENSDART00000166540 | kcnip3b             | -0.988549414 | -0.704807394 | -0.278733631 | 0.119291619  |
| ENSDART00000166560 | hpd1                | 0.319918962  | 0.542121436  | 0.616518616  | 0.488982996  |
| ENSDART00000166561 | ttc38               | 0.445202505  | 0.288306634  | -0.06639877  | -0.156646921 |
| ENSDART00000166566 | dgkh                | -1.438871843 | -1.330275705 | -0.819153793 | -0.068934495 |
| ENSDART00000166575 | ppp3ca              | -0.493387865 | -0.574192875 | 0.281204144  | 0.517021392  |
| ENSDART00000166580 | pak1                | 0.254456198  | 0.505135694  | 0.67991388   | 0.523148639  |
| ENSDART00000166587 | rhbd13              | 1.011972997  | 0.720471419  | 0.019687653  | -0.322773745 |
| ENSDART00000166591 | utp20               | 0.378085419  | 0.246513796  | 0.276819854  | 0.15697444   |
| ENSDART00000166607 | RAPGEF4 (1 of many) | -0.233842979 | 0.163001528  | 0.421327636  | 0.212581301  |
| ENSDART00000166615 | dnm2b               | 0.605203252  | 0.413218412  | 0.436607775  | -0.016254619 |
| ENSDART00000166618 | slc43a3a            | 0.880026964  | 0.262110574  | 0.534125771  | 0.347202731  |
| ENSDART00000166622 | si:dkey-77g12.1     | 1.256692313  | 2.663525112  | 1.501030031  | -0.081810387 |
| ENSDART00000166632 | si:zfos-741a10.3    | 1.2129476    | 0.572994738  | 0.242126634  | 0.029899239  |
| ENSDART00000166634 | rnf213b             | 0.322643691  | -0.072602668 | 2.242716781  | -0.029575481 |
| ENSDART00000166645 | HTR7 (1 of many)    | -0.91335189  | -0.965307725 | -0.027473732 | 0.473063601  |
| ENSDART00000166648 |                     | 0.095481351  | -0.09266769  | 0.456407618  | 0.379239728  |
| ENSDART00000166650 | bsg                 | -0.333252581 | -0.445374368 | -0.502358398 | -0.336861466 |
| ENSDART00000166659 | lrrn2               | -0.321629641 | -0.404637061 | -0.652990901 | -0.235544369 |
| ENSDART00000166664 | MIDN (1 of many)    | 0.609413165  | 0.740169365  | 0.964140975  | 0.212765964  |
| ENSDART00000166681 | frs1l               | -0.4975582   | -0.505651734 | -0.29386319  | -0.136005256 |
| ENSDART00000166690 | gadd45ga            | 1.824520476  | 2.195526461  | 0.938941318  | 1.401631316  |
| ENSDART00000166693 |                     | 0.184413566  | -0.110459993 | 1.581805418  | 0.290855458  |
| ENSDART00000166698 | lrsam1              | 0.035853538  | 0.184404018  | 0.265787714  | 0.064864391  |

|                    |                    |              |              |              |              |
|--------------------|--------------------|--------------|--------------|--------------|--------------|
| ENSDART00000166714 | imp2b              | -0.072742859 | -0.391473223 | -0.740015258 | -0.360324281 |
| ENSDART00000166724 | myom1b             | 0.206144619  | 0.433459222  | 0.498383662  | 0.501410774  |
| ENSDART00000166725 | si:dkey-27j5.9     | 1.657914875  | 0.40212862   | 0.542892045  | 0.141569929  |
| ENSDART00000166730 | slitrk4            | -0.433556166 | -0.537605748 | -0.487948345 | -0.301835783 |
| ENSDART00000166739 | si:zfos-2326c3.2   | 0.356689661  | 0.198077273  | 0.030512595  | -0.103105863 |
| ENSDART00000166755 | tril               | 1.481556618  | 0.917097925  | 0.535942919  | 0.363878102  |
| ENSDART00000166756 | mfsd11             | 0.314593735  | 0.230184492  | 0.795700169  | 0.565917277  |
| ENSDART00000166829 |                    | -0.799969413 | -0.359199835 | -0.712167572 | -2.039500454 |
| ENSDART00000166843 | tom1               | -0.282793851 | -0.146845245 | -0.347923357 | -0.109554429 |
| ENSDART00000166889 | nptna              | -0.194507678 | -0.523176341 | -0.288117341 | 0.166715743  |
| ENSDART00000166894 | si:dkey-16p6.1     | -3.041565726 | -0.566863861 | -1.581438015 | -0.461000528 |
| ENSDART00000166904 | AL840638.1         | -0.172150655 | -0.246843461 | -0.35641848  | -0.195598477 |
| ENSDART00000166957 | purba              | -0.28509761  | -0.466147452 | -0.146018067 | -0.191067595 |
| ENSDART00000166981 | snx8b              | -0.518943385 | -0.495275193 | -0.13677988  | -0.169307474 |
| ENSDART00000166992 | rab6a              | 0.863374482  | 0.610837796  | 0.548836905  | 0.594870039  |
| ENSDART00000167001 | cited4b            | -0.183655613 | -0.263694381 | -0.243829292 | -0.142076267 |
| ENSDART00000167025 | si:dkey-203a12.7   | 1.830928705  | 3.142170624  | 2.521496169  | 0.613627975  |
| ENSDART00000167032 | tp53rk             | 0.299937927  | 0.221076682  | 0.117069539  | 0.10102477   |
| ENSDART00000167035 | mibp2              | 0.52185156   | 0.897496666  | 1.068299106  | 0.608631566  |
| ENSDART00000167040 | pop1               | 0.818813588  | 0.594298576  | 0.588084483  | 0.531688582  |
| ENSDART00000167052 | etv1               | -0.327639473 | -0.469002174 | -0.32895701  | -0.22464313  |
| ENSDART00000167062 | SNORD49            | 0.825973685  | 1.057295844  | 0.696610061  | 0.75374548   |
| ENSDART00000167068 | kifap3b            | 0.204750718  | 0.408132617  | 0.569098043  | 0.272936415  |
| ENSDART00000167074 | irf2               | 0.133065149  | 0.222164622  | 0.608761767  | -0.104617341 |
| ENSDART00000167099 | CU459186.5         | 0.808307931  | 1.173553726  | 0.835552808  | 0.510196285  |
| ENSDART00000167117 | si:ch1073-469d17.2 | -0.226355895 | -0.436402154 | -0.568359696 | -0.320345187 |
| ENSDART00000167128 | pargl              | 0.159346244  | 0.133314978  | 0.619065571  | -0.065913899 |
| ENSDART00000167132 | isg20l2            | 0.391451776  | 0.35980411   | 0.120415307  | 0.040629954  |
| ENSDART00000167143 | glyr1              | -0.150233074 | -0.208555766 | -0.274679248 | -0.191034867 |
| ENSDART00000167145 | ap1ar              | 0.285895558  | 0.368048827  | 0.350688731  | 0.119518374  |
| ENSDART00000167154 | trim9              | -0.216985401 | -0.363840661 | -0.237534447 | -0.020888972 |
| ENSDART00000167164 | MPV17L             | -0.408335699 | -0.461800821 | -0.169486828 | -0.082955483 |
| ENSDART00000167177 | ccnf               | 1.106246818  | 1.046935028  | 0.737028811  | 0.1071592    |
| ENSDART00000167179 | asf1ba             | -0.325814646 | -0.52479315  | -0.773177729 | -0.605632897 |
| ENSDART00000167197 | spata18            | -0.430548228 | -0.388964562 | -0.077452756 | -0.001886549 |
| ENSDART00000167219 | pcdh1g26           | -0.056136761 | 0.084950376  | 0.428942573  | 0.447913813  |
| ENSDART00000167226 | pycr1b             | 0.1083633    | 0.252664475  | 0.730734657  | 0.419591074  |
| ENSDART00000167279 | klhl6              | 0.921934193  | 0.563560813  | 0.364277897  | 0.100202901  |
| ENSDART00000167306 | ldb2b              | -0.838228207 | -0.415457403 | -0.325734782 | 0.110687477  |
| ENSDART00000167322 | si:ch73-233f7.3    | -0.088252023 | 0.25632847   | 0.562157447  | 0.392412002  |
| ENSDART00000167324 | ebf3a              | -0.585714789 | -0.243731213 | 0.563349846  | 0.843370215  |
| ENSDART00000167330 | CU179758.1         | -0.385159517 | -0.273959547 | -0.55992419  | -0.56237529  |
| ENSDART00000167355 | nsfa               | -0.252585329 | -0.369691062 | -0.484691854 | -0.137375398 |
| ENSDART00000167359 | dusp27             | 1.665789827  | 1.31173846   | 1.624125812  | 1.13571557   |
| ENSDART00000167388 | vps33a             | 0.155328285  | 0.245633599  | 0.343008348  | 0.290252576  |
| ENSDART00000167391 | arhgap21a          | -0.385966805 | -0.235029359 | -0.527723306 | -0.308128762 |
| ENSDART00000167423 | si:dkey-242k1.6    | -0.388268724 | -0.337313048 | -0.259026873 | -0.237349722 |
| ENSDART00000167430 | lrrc24             | -0.125265238 | -0.400040145 | -0.093389228 | 0.002539389  |
| ENSDART00000167444 |                    | -0.313613371 | 0.27829227   | 0.501895099  | 0.307445871  |
| ENSDART00000167449 | sept15             | -0.329936507 | -0.127540958 | -0.290094259 | -0.186050001 |
| ENSDART00000167451 |                    | -0.147201966 | -0.622186255 | -0.321157937 | -0.196934609 |

|                    |                    |              |              |              |              |
|--------------------|--------------------|--------------|--------------|--------------|--------------|
| ENSDART00000167461 | BX897691.1         | 1.652413387  | 2.158428192  | 1.996842668  | 1.949150718  |
| ENSDART00000167464 | GNAZ               | -0.341892906 | -0.155068478 | 0.102581405  | 0.079027974  |
| ENSDART00000167468 | prpsap1            | 0.532862733  | 0.121505744  | 0.13944499   | -0.034080691 |
| ENSDART00000167502 | CR855860.1         | -0.377799337 | -0.542912736 | -0.423594114 | -0.115674527 |
| ENSDART00000167506 | scg2a              | -0.457333464 | -0.29124415  | -0.144155502 | -0.510044484 |
| ENSDART00000167514 | abca1a             | 0.214033988  | 0.130340273  | 0.268396538  | -0.115766571 |
| ENSDART00000167523 | dixdc1b            | -0.34575392  | -0.259524065 | -0.191239322 | -0.198083451 |
| ENSDART00000167570 | actr3b             | -0.361119463 | -0.449811578 | -0.822009016 | -0.639517901 |
| ENSDART00000167584 | aldh2.1            | -0.136059736 | -0.055428642 | -0.441396328 | -0.687740935 |
| ENSDART00000167612 | rnf34a             | -0.125673437 | -0.210904428 | -0.512991238 | -0.24247481  |
| ENSDART00000167613 | hmgcs1             | -0.061825835 | 0.154559892  | 0.893983325  | 0.609306628  |
| ENSDART00000167649 | pik3r3a            | -0.582543495 | -0.143058653 | -0.251972796 | -0.459052361 |
| ENSDART00000167660 | pja2               | -0.078344887 | -0.326712885 | -0.382150009 | -0.239022195 |
| ENSDART00000167664 | atxn1a             | -0.182914727 | -0.487043114 | -0.17911118  | -0.100136551 |
| ENSDART00000167666 | dnajc21            | 0.569585132  | 0.384796247  | 0.537599141  | 0.160116436  |
| ENSDART00000167667 | FKBP15 (1 of many) | 0.292301754  | 0.132288424  | 0.122963959  | -0.01266455  |
| ENSDART00000167696 | si:ch73-233f7.4    | 0.264747026  | 0.489460093  | 0.625111029  | 0.721718733  |
| ENSDART00000167726 | RYR2               | -0.554726037 | -0.413134766 | 0.099586067  | 0.289722828  |
| ENSDART00000167748 | fbn2b              | 1.02333483   | 0.65734038   | 0.922883374  | 0.19244827   |
| ENSDART00000167786 |                    | 0.801350724  | 0.147008366  | 0.081187044  | 0.322292312  |
| ENSDART00000167818 | atp2b2             | -0.603266889 | -0.926553396 | 0.035397356  | 0.064456748  |
| ENSDART00000167823 | CU651662.1         | 0.332182102  | 0.108414441  | -0.278380094 | -0.999717307 |
| ENSDART00000167824 | timp4.3            | -0.389539203 | -0.013931581 | -0.399789503 | -0.590224284 |
| ENSDART00000167847 | eef1a1l2           | -0.649781637 | -0.501730111 | -0.557800044 | -0.257462283 |
| ENSDART00000167861 | cox4i1l            | -0.902856097 | -1.26820767  | -1.375291282 | -0.702334306 |
| ENSDART00000167869 |                    | -3.349211506 | -1.484996272 | -1.5614357   | -0.542819931 |
| ENSDART00000167873 | baiap2b            | -0.183691734 | -0.21009419  | -0.266222434 | -0.177287211 |
| ENSDART00000167879 | Metazoa_SRP        | 3.268404605  | 5.790076     | 5.563915837  | 5.137733652  |
| ENSDART00000167881 |                    | 0.345756532  | 0.215047296  | 0.187007292  | 0.450693648  |
| ENSDART00000167937 | p4hb               | 0.35105827   | 0.247669444  | -0.015299318 | -0.184059227 |
| ENSDART00000167947 | CABZ01079480.1     | 0.418778383  | 0.234022686  | 1.236946888  | 0.318728833  |
| ENSDART00000167948 | hcn1               | -0.135796002 | -0.504326543 | -0.514845616 | -0.152463147 |
| ENSDART00000167956 | tspan18a           | -0.226187052 | -0.301324705 | -0.40566671  | -0.255395447 |
| ENSDART00000167963 | nrg1               | -0.278608256 | -0.388339035 | -0.420420553 | -0.389329729 |
| ENSDART00000167971 | rps18              | 0.367747716  | 0.388045404  | 0.209564172  | -0.058761163 |
| ENSDART00000167977 | kcnh4b             | -0.815041676 | -0.830195363 | -1.200187818 | -0.588368652 |
| ENSDART00000167986 | hadhb              | 0.310832473  | 0.238522601  | 0.004510639  | -0.025410475 |
| ENSDART00000167995 | napba              | -0.341681302 | -0.334450461 | -0.176497327 | -0.027366162 |
| ENSDART00000168002 | laptm5             | 1.090713638  | 0.609708871  | 0.327355694  | -0.215403696 |
| ENSDART00000168004 | rps18              | 0.800703549  | 0.805799198  | 0.576669388  | 0.538808303  |
| ENSDART00000168028 | si:dkey-225f23.5   | -0.209864951 | -0.328595081 | -0.21349874  | -0.05336952  |
| ENSDART00000168036 | rdh8b              | -0.188576333 | -0.341040166 | -0.496499443 | -0.09323063  |
| ENSDART00000168038 | edil3a             | -0.585018977 | -0.697545399 | -0.17495912  | 0.33520597   |
| ENSDART00000168083 | Metazoa_SRP        | 1.497191597  | 1.645034783  | 1.435853831  | 0.615781715  |
| ENSDART00000168084 | scp2b              | -0.093323025 | -0.125270421 | -0.400440129 | -0.264110493 |
| ENSDART00000168089 | cyp27a7            | -0.742372496 | -0.705345887 | -0.793489907 | -0.543448957 |
| ENSDART00000168107 | crb2b              | -0.111814011 | -0.354478217 | -0.285757255 | 0.093257061  |
| ENSDART00000168121 | lzts3a             | -0.348828928 | -0.543883063 | -0.164874094 | 0.093345065  |
| ENSDART00000168132 | si:ch1073-82l19.1  | -0.151537059 | -0.297036072 | -0.500517261 | -2.428975421 |
| ENSDART00000168155 | si:ch211-194m7.4   | 2.689408284  | 1.434584454  | 0.930290361  | -0.08573457  |
| ENSDART00000168157 | mkrn2os.2          | 0.50354684   | 0.675600001  | 1.137753613  | 0.994948824  |



|                    |                    |              |              |              |              |
|--------------------|--------------------|--------------|--------------|--------------|--------------|
| ENSDART00000168160 | pip5k1cb           | -0.047296457 | -0.437985038 | -0.478356963 | -0.284131261 |
| ENSDART00000168162 | FQ323156.1         | -0.536894775 | -1.163960845 | -0.494433057 | -0.466334383 |
| ENSDART00000168163 | hnrnpabb           | 0.035490772  | 0.022906035  | 0.318157336  | 0.096428682  |
| ENSDART00000168167 | rtcb               | 0.060457492  | 0.250042841  | 0.449158496  | 0.303788278  |
| ENSDART00000168170 | ttc39c             | -0.270510539 | -0.264194482 | -0.052910688 | -0.079707834 |
| ENSDART00000168188 | mettl1             | 0.565360225  | 0.37588106   | 0.377233069  | 0.251655436  |
| ENSDART00000168201 | golim4a            | -0.134763119 | -0.005515007 | -0.245821925 | -1.172515705 |
| ENSDART00000168218 | CABZ01111953.1     | -0.582414072 | -0.415065608 | 0.00894593   | 0.020084563  |
| ENSDART00000168228 | tmem184a           | -0.3188994   | -0.465602708 | -0.713259634 | -0.580015552 |
| ENSDART00000168241 | tubb2b             | -0.194997441 | 0.285540167  | 0.888424822  | 0.706942534  |
| ENSDART00000168246 | spryd3             | -0.145299627 | -0.212114286 | -0.257834151 | -0.152966783 |
| ENSDART00000168270 | CABZ01048053.1     | -0.515099411 | -0.533680852 | 0.225344787  | 0.362581791  |
| ENSDART00000168276 | scarb1             | -3.646800721 | -2.308559886 | 0.370802474  | 0.243200954  |
| ENSDART00000168277 | boka               | -0.236090037 | -0.162724249 | -0.56155479  | -0.509356169 |
| ENSDART00000168278 | si:ch211-276i12.4  | -0.631335043 | -0.270754342 | -0.641142033 | -0.623314164 |
| ENSDART00000168309 | trim25             | 1.908271479  | 1.980136553  | 2.767316449  | 1.926127968  |
| ENSDART00000168310 | acap3b             | -0.431660294 | -0.622927148 | -0.474200982 | -0.250587028 |
| ENSDART00000168317 | apba1a             | -0.329639415 | -0.090034986 | 0.20399901   | 0.390106315  |
| ENSDART00000168371 | mibp               | 1.064831288  | 1.384792727  | 1.720455753  | 0.84273718   |
| ENSDART00000168376 | Metazoa_SRP        | 0.77672172   | 1.175457852  | 1.304833035  | 1.047872554  |
| ENSDART00000168377 | thrap3b            | 0.204741923  | -0.103859097 | 0.348419918  | 0.136670023  |
| ENSDART00000168396 | FO904869.1         | -0.490668054 | -0.607434677 | -0.194530972 | 0.12309886   |
| ENSDART00000168419 | rsu1               | 0.608707901  | 0.588635147  | 0.668370486  | 0.283061431  |
| ENSDART00000168453 | slc43a2a           | -0.36850619  | -0.532753158 | 0.198651765  | 0.248433931  |
| ENSDART00000168472 | creb5a             | 2.212193939  | 1.443174599  | 0.809493268  | 0.247644913  |
| ENSDART00000168483 | si:dkey-16p21.7    | 0.12768447   | 0.414452748  | 0.453712173  | 0.342486315  |
| ENSDART00000168497 | eef2b              | 0.448731314  | 0.547292163  | 0.7539331    | 0.364287935  |
| ENSDART00000168518 | asic4b             | -0.92148029  | -1.144921239 | -0.577321683 | -0.304835302 |
| ENSDART00000168531 | irf2bp2b           | -0.128403316 | -0.188582728 | -0.404745176 | -0.138034767 |
| ENSDART00000168534 | NPFFR2 (1 of many) | -0.514269049 | -0.40572501  | -0.533037042 | -0.336902595 |
| ENSDART00000168542 | arf3a              | 0.034708072  | 0.783187174  | 0.81852048   | 0.521503928  |
| ENSDART00000168556 | ostf1              | 1.22625882   | 1.436442197  | 0.76765034   | 0.887655813  |
| ENSDART00000168559 | ttf2               | -3.902752419 | 0.990904721  | 1.020977359  | 0.830250106  |
| ENSDART00000168565 | txnbb              | 0.43423077   | 0.785550255  | 1.235069922  | 1.025671009  |
| ENSDART00000168568 | CU861477.1         | -0.399340079 | -0.694343635 | -0.183948068 | 0.054030168  |
| ENSDART00000168608 | rnaset2            | 1.085971834  | 0.685727013  | 0.397141355  | 0.382009137  |
| ENSDART00000168610 | si:ch211-283g2.2   | 1.147251625  | 1.274539863  | 1.168500693  | 0.162307024  |
| ENSDART00000168616 | ppa1a              | 0.095923853  | -0.258115212 | -0.556184684 | -0.293684673 |
| ENSDART00000168627 | zfyve9a            | -0.287315941 | -0.130733792 | -0.157388884 | -0.011640067 |
| ENSDART00000168631 | cacna1hb           | -0.565978595 | -0.722362792 | -0.435741841 | -0.029665329 |
| ENSDART00000168633 | CABZ01085700.1     | -0.53401794  | -0.080184443 | 0.667052745  | 0.803861054  |
| ENSDART00000168639 | cry1ab             | -0.18716056  | -0.280815639 | -0.387838008 | -0.275846695 |
| ENSDART00000168641 | CT030188.1         | 0.86349998   | 1.431982341  | 1.038679795  | -0.017052584 |
| ENSDART00000168653 | fam110b            | -0.266298706 | -0.306955651 | -0.224541228 | -0.085175606 |
| ENSDART00000168683 | lrrc8c             | 0.403272924  | 0.771214032  | 0.877257507  | 0.389191376  |
| ENSDART00000168698 | ostf1              | 0.435343641  | 0.254095599  | -0.055556308 | -0.273490651 |
| ENSDART00000168705 | si:ch73-103b11.2   | -0.165771907 | -0.231080784 | -0.260448742 | -0.241729977 |
| ENSDART00000168718 | chrn5a             | -0.32077931  | -0.748869105 | -0.317792694 | -0.07500967  |
| ENSDART00000168727 | zgc:64065          | 0.439077495  | 0.173893761  | 0.133684815  | 0.136149811  |
| ENSDART00000168729 | fam196ab           | -0.54578901  | -0.555866325 | -0.405243034 | 0.063979844  |
| ENSDART00000168749 | nlgn3a             | -0.417078437 | -0.490224096 | -0.240516544 | -0.086053557 |

|                    |                   |              |              |              |              |
|--------------------|-------------------|--------------|--------------|--------------|--------------|
| ENSDART00000168750 | smarca1           | -0.162085202 | -0.116464254 | -0.382463649 | -0.380530416 |
| ENSDART00000168754 | cacnb2a           | -0.312716955 | -0.298709564 | -0.211334034 | -0.110938146 |
| ENSDART00000168778 | stt3a             | 0.3508706    | 0.104695298  | -0.028500788 | -0.125020463 |
| ENSDART00000168799 | ggps1             | 0.829174536  | 0.521929251  | 0.538342651  | 0.450861168  |
| ENSDART00000168805 | kcnk9             | -0.553605245 | -0.952161118 | -0.308244106 | 0.289642563  |
| ENSDART00000168821 | CDH22             | -0.242258311 | -0.624670054 | -0.303879761 | -0.070304381 |
| ENSDART00000168822 | pabpc4            | 1.120879979  | 1.597763229  | 2.131974577  | 1.975353129  |
| ENSDART00000168831 | si:ch73-158p21.3  | 1.161771941  | 0.892729958  | 0.502592433  | 0.147950065  |
| ENSDART00000168840 | rpl35a            | 0.357031004  | 0.320334573  | 0.163051637  | -0.036511823 |
| ENSDART00000168849 | si:ch211-147m6.2  | 1.772352788  | 0.845008987  | -0.374275663 | -0.738910487 |
| ENSDART00000168850 | taok1b            | -0.044686095 | -0.116318692 | -0.429811181 | -0.132610503 |
| ENSDART00000168851 | rab11fip2         | 0.212709727  | 0.193153756  | 0.330809666  | 0.288597218  |
| ENSDART00000168876 | si:dkey-81h8.1    | -0.18803818  | 0.217329319  | 0.889109393  | 1.046963425  |
| ENSDART00000168885 | nrg1              | -0.78621851  | -0.719452399 | 0.167065606  | 0.289901187  |
| ENSDART00000168898 | hspa8             | 1.373917849  | 0.861861784  | 0.886683158  | 0.865443603  |
| ENSDART00000168899 | pcdh1g33          | -0.406478127 | -0.012838877 | 0.30409891   | 0.306864798  |
| ENSDART00000168902 | Metazoa_SRP       | 0.908254207  | 1.60749636   | 1.079432418  | 0.706761496  |
| ENSDART00000168910 | ablim3            | -0.457548186 | -0.818398336 | -0.469699072 | -0.283516024 |
| ENSDART00000168913 | CABZ01113883.1    | 0.283917325  | -0.023921963 | -0.385162746 | -1.507337386 |
| ENSDART00000168918 | pcdh1gc6          | 0.501599317  | 0.826475212  | 1.380988505  | 1.066751642  |
| ENSDART00000168920 | nbeab             | -0.251742312 | -0.363594185 | -0.174304201 | -0.037829821 |
| ENSDART00000168922 | Metazoa_SRP       | 1.221075219  | 2.596056056  | 2.04902232   | 1.755997125  |
| ENSDART00000168935 | mfsd8             | 0.060271678  | -0.029632781 | -0.242261851 | -0.178722202 |
| ENSDART00000168957 | cdh18a            | -0.488858345 | -0.440968125 | -0.25726489  | -0.177287767 |
| ENSDART00000168969 | htr7c             | -0.617759768 | -0.791263551 | -0.091828465 | 0.038777953  |
| ENSDART00000168996 | plrdgb            | -0.579612528 | -0.647606525 | -0.269512976 | 0.036793619  |
| ENSDART00000169006 | ak2               | 0.70404039   | 0.489848323  | 0.563968118  | 0.137147044  |
| ENSDART00000169023 | scn1lab           | 0.230826198  | 0.448869227  | 0.411715364  | 0.200031153  |
| ENSDART00000169026 | jak2a             | 0.024039251  | 0.103369971  | 0.328189294  | 0.009690028  |
| ENSDART00000169040 | si:ch211-235e9.8  | -0.436326332 | -0.357257361 | -0.23322888  | -0.084450729 |
| ENSDART00000169052 | elovl1b           | 0.945814486  | 1.07228669   | 0.819418014  | 0.365575121  |
| ENSDART00000169060 | si:ch211-212k18.5 | -0.245044911 | -0.301564521 | -0.568174767 | -0.780659219 |
| ENSDART00000169061 | CU138533.1        | 0.641184794  | 1.068185172  | 1.17226183   | 0.773255864  |
| ENSDART00000169081 | mtmr7b            | -0.302136082 | -0.184242994 | 0.142322853  | 0.09943817   |
| ENSDART00000169091 | psd2              | -0.329495857 | -0.192167097 | 0.082881422  | 0.17989231   |
| ENSDART00000169105 | pcdh1g29          | -0.285141513 | 0.143203693  | 0.405619816  | 0.452362051  |
| ENSDART00000169108 | kcnj12a           | -0.480725794 | -0.616905664 | -0.509410819 | -0.355199716 |
| ENSDART00000169116 | cpne4a            | -0.476761925 | -0.590434794 | -0.280550227 | 0.444813194  |
| ENSDART00000169119 | ndrg4             | -0.4692852   | -0.086247828 | 0.285804524  | 0.242386508  |
| ENSDART00000169127 | adgrb3            | -0.338634159 | -0.316792657 | -0.154400064 | 0.089681207  |
| ENSDART00000169129 | ndrg4             | -0.326143464 | -0.61306806  | -0.078381969 | -0.216584442 |
| ENSDART00000169130 | ftr64             | 0.270335706  | 0.025822717  | 1.271602536  | 0.119170332  |
| ENSDART00000169136 | CABZ01007222.1    | -0.363042867 | -0.477045243 | -0.379599521 | -0.116458215 |
| ENSDART00000169165 | CABZ01021450.1    | -0.130594664 | -0.107324732 | -0.381541063 | -0.095206853 |
| ENSDART00000169187 | ptpro             | 0.079888282  | 0.61716785   | 1.250280006  | 1.189522062  |
| ENSDART00000169201 | pcdh2g16          | 0.673146228  | 0.480832534  | 0.40403692   | 0.542228011  |
| ENSDART00000169202 | si:ch211-153b23.5 | 4.343063064  | 5.139014825  | 3.462179286  | 1.548865865  |
| ENSDART00000169209 | ptrh1             | 0.68284848   | 0.772674127  | 0.446966304  | 0.22472723   |
| ENSDART00000169210 | CABZ01072550.1    | -0.141044522 | -0.137807967 | -0.329360205 | -0.030428593 |
| ENSDART00000169228 | vat1l             | 0.089392965  | -0.09841303  | -0.250056266 | -0.442720544 |
| ENSDART00000169243 | znf384l           | -0.366831524 | -0.600767675 | -0.247311028 | 0.205515141  |

|                    |                     |              |              |              |              |
|--------------------|---------------------|--------------|--------------|--------------|--------------|
| ENSDART00000169248 | drd4-rs             | -0.178692855 | -0.390296441 | -0.526046415 | -0.318223636 |
| ENSDART00000169275 | sdad1               | 0.31633119   | 0.22409068   | 0.190752906  | 0.014420983  |
| ENSDART00000169309 | si:dkey-203a12.2    | 1.554830383  | 2.508546052  | 1.961959042  | 0.546471184  |
| ENSDART00000169322 | zbtb21              | -0.157953464 | -0.169354872 | -0.299279576 | -0.291807058 |
| ENSDART00000169341 | nrp1a               | 0.186448987  | 0.415165621  | 0.563193133  | 0.501195382  |
| ENSDART00000169343 | kdf1b               | -0.449286765 | -0.274976378 | -0.544184682 | -0.396728296 |
| ENSDART00000169363 | CR678435.1          | -0.089321474 | -0.319658973 | -0.354063558 | -0.259523127 |
| ENSDART00000169365 | Metazoa_SRP         | 2.055456458  | 2.688758632  | 2.943606625  | 2.098435714  |
| ENSDART00000169367 | CABZ01061884.1      | -0.298329532 | -0.377577791 | -0.54544765  | -0.245416552 |
| ENSDART00000169375 | znf1151             | 2.128272751  | 1.140055383  | 3.010647967  | 3.121008171  |
| ENSDART00000169376 | PLEKHG5 (1 of many) | -0.003560342 | -0.365335228 | -0.516938003 | -0.057649582 |
| ENSDART00000169380 | slc25a43            | -0.226077688 | 0.088930874  | -0.355915914 | -0.508574161 |
| ENSDART00000169407 | fynb                | -0.281673654 | -0.267434526 | -0.200981958 | -0.171531273 |
| ENSDART00000169447 | sorbs1              | 0.299961188  | 0.420748275  | 0.143707838  | 0.107473415  |
| ENSDART00000169452 | CR848841.2          | 1.41519844   | 0.623487161  | 0.225042545  | -0.111771198 |
| ENSDART00000169462 | fam189a1            | -0.165720729 | -0.526215514 | -0.059981823 | -0.273837885 |
| ENSDART00000169477 | tmem176l.1          | 0.297546209  | 0.073954032  | -0.516480584 | -0.864341304 |
| ENSDART00000169484 | amph                | -0.176945265 | -0.219628366 | -0.476094931 | -0.135317446 |
| ENSDART00000169511 | ppp2r2bb            | -0.347621729 | -0.40572046  | -0.501873649 | -0.158073428 |
| ENSDART00000169514 | cacna1db            | -0.154801093 | -0.201285475 | -0.375153121 | -0.07189092  |
| ENSDART00000169531 | traf2b              | -0.006517414 | -0.077905282 | -0.353292738 | -0.278704886 |
| ENSDART00000169548 | rgs7b               | -0.179117493 | -0.337814246 | -0.235695562 | -0.091038288 |
| ENSDART00000169552 | cdh13               | -0.778914955 | -0.463881372 | -0.06287293  | 0.145633136  |
| ENSDART00000169600 | abhd4               | 0.160082589  | 0.423680439  | -0.10396044  | -0.08495852  |
| ENSDART00000169609 | tefb                | -0.156114581 | -0.555141888 | -0.301378906 | -0.24132076  |
| ENSDART00000169614 | nadsyn1             | 0.473419312  | 0.288129879  | -0.022685337 | -0.020046915 |
| ENSDART00000169626 | kcnc1a              | -0.804732723 | -1.394467436 | -0.226498418 | 0.073837621  |
| ENSDART00000169633 | col4a3bpb           | 0.489929413  | 0.127889926  | -0.192097119 | -0.259910666 |
| ENSDART00000169644 | CU659306.1          | 0.286956046  | 0.461515845  | 0.629089247  | 0.128650576  |
| ENSDART00000169648 |                     | 0.47490981   | 0.626028668  | 1.036581019  | 0.748938091  |
| ENSDART00000169663 | CT573860.1          | 0.353646224  | 0.562802664  | 0.454063437  | 0.329757181  |
| ENSDART00000169667 | ptpro               | -0.163271096 | 0.493460364  | 0.820001756  | 0.696103761  |
| ENSDART00000169682 | hdac4               | -0.093013902 | -0.31519447  | 0.302479135  | 0.371645007  |
| ENSDART00000169687 | dlg1                | -0.200796553 | -0.39742906  | -0.281934456 | -0.007509175 |
| ENSDART00000169698 | zgc:158343          | -0.309656325 | -0.821697026 | -0.621795526 | -0.564704541 |
| ENSDART00000169710 | utp23               | 0.386723475  | 0.25777974   | 0.117505162  | 0.115827548  |
| ENSDART00000169717 | ca5a                | 0.91389398   | 0.899982871  | 0.348639788  | 0.672790664  |
| ENSDART00000169723 | HERC5               | -0.128535223 | -0.136551326 | 0.521223162  | -0.158454388 |
| ENSDART00000169733 | klhl23              | -0.117061422 | -0.244154323 | -0.447638501 | -0.20478162  |
| ENSDART00000169746 | ampd2a              | -0.446564291 | -0.523779729 | -0.426555345 | -0.117905151 |
| ENSDART00000169764 | syt1a               | -0.535633412 | -0.482595993 | -0.403145231 | -0.029612735 |
| ENSDART00000169768 | slc8a3              | -0.133596734 | -0.60366341  | -0.159093114 | 0.187240856  |
| ENSDART00000169789 | grap2b              | 0.941263606  | 0.635408975  | 0.416956975  | 0.146969065  |
| ENSDART00000169810 | stub1               | -0.352758303 | -0.24873956  | -0.212157701 | -0.100812458 |
| ENSDART00000169823 | pnpla3              | 0.41574021   | 0.387767111  | 0.775977498  | 0.378524498  |
| ENSDART00000169828 | rlbp1a              | -0.278789297 | -0.290042852 | -0.461967142 | -0.22894081  |
| ENSDART00000169834 | CABZ01052431.1      | 0.752252615  | 0.635370532  | 0.523133762  | 0.005708707  |
| ENSDART00000169845 | pargl               | 0.069840572  | -0.083042796 | 0.787500652  | -0.250417109 |
| ENSDART00000169852 | RPL37A              | 0.3117075    | 0.379509479  | 0.225285723  | 0.045531307  |
| ENSDART00000169853 | slmapa              | -0.949896363 | -1.088521821 | -0.936929707 | -0.657167359 |
| ENSDART00000169887 | wu:fu71h07          | 0.98545678   | 0.406691046  | 0.849706316  | 0.386892251  |

|                    |                  |              |              |              |              |
|--------------------|------------------|--------------|--------------|--------------|--------------|
| ENSDART00000169892 | srp54            | 2.340238808  | 3.996874038  | 2.498816008  | 1.178878233  |
| ENSDART00000169895 | zbtb18           | 0.009752394  | -0.192437538 | -0.328439949 | -0.081774144 |
| ENSDART00000169915 | nop58            | 0.425406041  | 0.33755518   | 0.254231429  | 0.051624158  |
| ENSDART00000169916 | dmxl2            | -0.252318602 | -0.45068029  | 0.053959432  | 0.232942265  |
| ENSDART00000169923 | ndel1b           | -0.007054921 | -0.080749821 | -0.505244725 | -0.275115017 |
| ENSDART00000169932 | ccdc142          | -0.157730988 | -0.223081294 | -0.3402281   | -0.055715693 |
| ENSDART00000169936 | sox8a            | -0.26561801  | -0.150998063 | -0.108428913 | -0.111175355 |
| ENSDART00000169940 | tmem176l.1       | 0.227275106  | 0.228370918  | -0.147494824 | -0.481831855 |
| ENSDART00000169942 | stx3a            | -0.199600759 | -0.344637551 | -0.343244623 | -0.200314073 |
| ENSDART00000169943 | CABZ01084447.1   | -0.382296742 | -0.397697491 | -0.572266726 | -0.473542202 |
| ENSDART00000169945 | si:ch73-236c18.7 | 1.628999904  | 1.036261941  | 0.5890347    | 0.798137712  |
| ENSDART00000169946 |                  | -0.124122046 | -0.322722589 | -0.278305257 | 0.008390957  |
| ENSDART00000169948 | GRM7             | -0.415342332 | -0.376852993 | -0.226859206 | -0.023200649 |
| ENSDART00000169951 | Metazoa_SRP      | 1.195279937  | 1.735123002  | 1.057793715  | 0.943058282  |
| ENSDART00000169953 | dctn1b           | -0.327369492 | -0.021477792 | 0.065821587  | 0.193833161  |
| ENSDART00000169963 | ryr1b            | -0.099451213 | -0.21486392  | 0.409324638  | 0.697954707  |
| ENSDART00000169972 | ndst1b           | -0.191299747 | -0.313711004 | -0.152975304 | -0.236354037 |
| ENSDART00000169976 | CABZ01034529.1   | 0.902549952  | 0.806876908  | 0.306228824  | 0.021333022  |
| ENSDART00000169989 | BX649355.1       | 0.986946969  | 0.719472766  | 0.338456492  | 0.762216016  |
| ENSDART00000169993 | stx12            | 0.289245416  | 0.334302649  | 0.162033659  | 0.014864416  |
| ENSDART00000169999 |                  | 0.330954109  | -0.605210778 | -0.313930686 | -0.099685871 |
| ENSDART00000170012 | mapre3b          | -0.205130823 | -0.301066074 | -0.42167523  | -0.136278286 |
| ENSDART00000170021 |                  | 2.405989626  | 2.77310135   | 2.003596445  | 2.210644738  |
| ENSDART00000170060 | mdh1b            | 3.761355509  | 3.246314783  | 3.336555843  | 1.787365183  |
| ENSDART00000170089 | epha4b           | -0.586426265 | -0.698463168 | -0.228203192 | -0.016930318 |
| ENSDART00000170095 | CR388166.2       | 0.588171845  | 0.299671021  | 0.452688856  | 0.506464888  |
| ENSDART00000170107 | ppp2r2ba         | 0.343342582  | 0.340534473  | 0.3871703    | 0.276562577  |
| ENSDART00000170116 | uap1             | 0.399345456  | 0.560025587  | 0.455223073  | 0.418274301  |
| ENSDART00000170133 | eci1             | 2.097463401  | 3.784028698  | 2.248505252  | 3.097351651  |
| ENSDART00000170165 | cep97            | -4.277597338 | -0.154895502 | -0.337498335 | -0.461056374 |
| ENSDART00000170184 | fgd1             | 0.020796397  | 0.102196495  | 0.582360556  | 0.487921156  |
| ENSDART00000170191 | FQ311879.1       | -0.155204603 | -0.24875676  | -0.288299334 | -0.086604212 |
| ENSDART00000170204 | si:zfos-364h11.2 | 0.504424795  | 0.456776646  | 0.313589859  | -0.247114093 |
| ENSDART00000170208 | limch1b          | -0.042803542 | -0.148322889 | -0.621537079 | -0.273084471 |
| ENSDART00000170222 | mibp             | 1.202449519  | 1.249757535  | 1.712700336  | 0.61416841   |
| ENSDART00000170228 | sept9b           | -0.22300654  | -0.343163525 | -0.367834845 | -0.241839556 |
| ENSDART00000170284 | creb3l3l         | 0.444489468  | 0.957040221  | 0.49606022   | 0.414651857  |
| ENSDART00000170285 | def8             | -0.050118345 | -0.13948188  | -0.345534099 | -0.220243255 |
| ENSDART00000170304 | CABZ01039096.1   | 1.863106121  | 1.329668381  | 1.247074235  | 0.639142974  |
| ENSDART00000170324 | tom1             | -0.260627206 | -0.142873643 | -0.174666961 | -0.048298907 |
| ENSDART00000170325 | map7d1b          | -0.159995641 | 0.033353383  | 0.380064991  | 0.315967697  |
| ENSDART00000170326 | gadd45ba         | 1.741159479  | 1.754335562  | 1.06756424   | 0.870946071  |
| ENSDART00000170341 | apba1a           | -0.229826313 | -0.069954525 | 0.548704484  | 0.456234995  |
| ENSDART00000170351 | nbeal1           | -0.047098407 | -0.274555108 | -0.182658383 | -0.033615077 |
| ENSDART00000170362 | CABZ01088490.1   | -0.602203241 | -0.75748097  | -0.591873288 | -0.034015136 |
| ENSDART00000170374 | si:dkey-38l22.2  | 1.50589782   | 1.851640662  | 1.322719067  | 0.692201779  |
| ENSDART00000170376 | mpp7a            | -0.022565767 | -0.302686812 | -0.467837523 | -0.093897739 |
| ENSDART00000170381 | CR855389.1       | -0.538290002 | -0.347216121 | -0.566215377 | -0.407287476 |
| ENSDART00000170383 | CABZ01089777.1   | -0.22190804  | -0.652997161 | -0.608886761 | -0.372475629 |
| ENSDART00000170385 | tgm1l1           | 0.820949739  | 0.875506718  | 1.293638142  | 0.305667169  |
| ENSDART00000170396 | apbb2b           | -0.997027217 | -0.745617105 | 0.597402109  | 1.180709512  |

|                    |                    |              |              |              |              |
|--------------------|--------------------|--------------|--------------|--------------|--------------|
| ENSDART00000170405 | CARTPT (1 of many) | 1.790273718  | 2.206490975  | 2.680185278  | 2.041251968  |
| ENSDART00000170422 | si:dkey-19b23.8    | 0.497209105  | 1.26444289   | 1.061660184  | 0.502612026  |
| ENSDART00000170423 | jakmip3            | -0.243674673 | -0.387799515 | -0.202768181 | 0.090619484  |
| ENSDART00000170433 | tert               | 0.747709966  | 0.573674682  | 0.803557653  | 0.065172489  |
| ENSDART00000170441 | CLDN23             | -0.099162778 | -0.365194678 | -0.492897369 | -0.25219875  |
| ENSDART00000170453 | slc20a1b           | -0.460714141 | -0.247481668 | -0.017046699 | -0.023964599 |
| ENSDART00000170456 | shroom3            | 0.242207867  | 0.41278364   | 0.171514229  | -0.137113926 |
| ENSDART00000170460 | nrxn3b             | -0.2276052   | -0.615850363 | -0.134586161 | -0.003465474 |
| ENSDART00000170466 | gch2               | 0.005943316  | 1.153050374  | 0.394171756  | -0.303921757 |
| ENSDART00000170470 | ghrhra             | -0.141377937 | -0.217703208 | -0.411536652 | -0.240637833 |
| ENSDART00000170510 | RIMBP2 (1 of many) | -0.653406892 | -0.568163429 | -0.174788334 | -0.007324529 |
| ENSDART00000170512 | ctnnd1             | 0.874551431  | 1.060254696  | 0.863956713  | 0.322404291  |
| ENSDART00000170518 | anxa1c             | -0.336866673 | -0.270774527 | -0.035149981 | -0.070098806 |
| ENSDART00000170526 | CABZ01021220.1     | -0.34731151  | -0.318997758 | -0.303107193 | -0.013605358 |
| ENSDART00000170546 | wdr17              | -0.20142732  | -0.213426713 | -0.433783757 | -0.087288031 |
| ENSDART00000170562 | ece2b              | -0.279383738 | -0.308974349 | -0.125983301 | -0.132241867 |
| ENSDART00000170569 | syt12              | -0.747896951 | -0.906145295 | -0.362441574 | -0.047384497 |
| ENSDART00000170571 | dmtn               | 0.084482265  | 0.234365609  | 0.453911363  | 0.30033427   |
| ENSDART00000170572 | lepa               | 4.559547685  | 4.778234325  | 4.366752593  | 2.765663683  |
| ENSDART00000170575 | nfat5b             | -0.001493923 | -0.392122738 | -0.566909919 | -0.288747412 |
| ENSDART00000170583 | march8             | -0.037993536 | -0.377054474 | -0.284528801 | -0.103767971 |
| ENSDART00000170589 | mibp               | 1.067201928  | 1.476075399  | 1.501871782  | 0.758874349  |
| ENSDART00000170601 | si:ch1073-228h2.2  | 1.512427811  | 1.187632525  | 1.253650535  | 1.028624188  |
| ENSDART00000170620 | ctxn1              | -1.120908397 | -0.319127099 | 0.144625495  | 0.239695278  |
| ENSDART00000170630 | BX511034.7         | 0.940574459  | 1.49905624   | 1.717428689  | 0.604931976  |
| ENSDART00000170631 | ebf1a              | -0.245696473 | -0.326200552 | -0.132641619 | 0.115308885  |
| ENSDART00000170632 | gngt2b             | -0.25352879  | -0.46015013  | -0.596390898 | -0.26583618  |
| ENSDART00000170671 | megf8              | 0.369502187  | 0.913401505  | 1.13324158   | 0.463058503  |
| ENSDART00000170675 | col11a1a           | -3.564960509 | -0.565137585 | -0.451612456 | -1.057274574 |
| ENSDART00000170680 | ptprdb             | -0.822263801 | -1.170454394 | 0.28663796   | 0.697055522  |
| ENSDART00000170684 | btf3               | 0.237794169  | 0.784907824  | 0.656975875  | 0.357635511  |
| ENSDART00000170695 | lrit1b             | -0.349980517 | -0.215317539 | -0.688918418 | -0.304938883 |
| ENSDART00000170700 | nacc1b             | -0.295710389 | -0.416714615 | 0.013950982  | 0.110349783  |
| ENSDART00000170709 | st8sia1            | -0.358435626 | -0.336878724 | -0.21402261  | -0.093884674 |
| ENSDART00000170752 | tox2               | -0.491067711 | -0.314026775 | -0.014696402 | 0.264527682  |
| ENSDART00000170755 | slc30a8            | 0.607491231  | 0.345740737  | -0.026161917 | -0.397029232 |
| ENSDART00000170757 | kntc1              | 0.719300782  | 0.704073311  | 0.501967558  | 0.060438055  |
| ENSDART00000170758 | tcirg1b            | 0.779415513  | 0.215400071  | 0.036968665  | -0.339490039 |
| ENSDART00000170762 | slc44a5b           | -0.083921908 | -0.392138039 | -0.663427101 | -0.045247688 |
| ENSDART00000170768 | lect1              | 3.805179034  | 4.274135568  | 2.696697623  | 2.532825072  |
| ENSDART00000170790 | thrb               | -0.205328436 | -0.495702017 | -0.443190893 | -0.211013858 |
| ENSDART00000170810 | si:dkey-10p5.7     | 1.115159817  | 1.313044185  | 0.773496009  | 0.334257673  |
| ENSDART00000170827 | ccpg1              | 0.08168444   | -0.121915293 | -0.302033768 | -0.268515452 |
| ENSDART00000170834 | znf1179            | 0.46327857   | 0.626036671  | 0.707498793  | 0.811192005  |
| ENSDART00000170839 | pcdh1g26           | -0.648364026 | -0.34360777  | 0.683964001  | 0.607743239  |
| ENSDART00000170854 | gphnb              | -0.471165414 | -0.533169869 | -0.144401896 | 0.220388206  |
| ENSDART00000170856 | smu1b              | 0.353209488  | -0.339997639 | -0.798035862 | -0.487523616 |
| ENSDART00000170865 | nme2b.1            | 0.635993303  | 0.679448572  | 0.689008761  | 0.355584206  |
| ENSDART00000170872 | tpm2               | -0.143399476 | 2.621381225  | 3.304047609  | 1.793877447  |
| ENSDART00000170874 | phldb1b            | 0.7459988    | 0.426405219  | 0.977480972  | 0.780660286  |
| ENSDART00000170875 | BX663610.1         | -0.528067918 | -0.63401091  | -0.217086155 | -0.025338796 |

|                    |                   |              |              |              |              |
|--------------------|-------------------|--------------|--------------|--------------|--------------|
| ENSDART00000170886 | dennd1b           | -0.037953425 | -0.315629797 | -0.364933587 | -0.202214668 |
| ENSDART00000170888 | pkma              | -0.382873513 | -0.359191464 | -0.202639045 | 0.04775771   |
| ENSDART00000170932 | rims2a            | -0.482409185 | -0.599060629 | -0.273352321 | -0.056203652 |
| ENSDART00000170951 | PXDN              | 0.459355707  | 0.64772414   | 0.996368549  | 0.498632459  |
| ENSDART00000170952 | pvr12l            | -0.402141005 | -0.731362921 | -0.043297784 | 0.281757642  |
| ENSDART00000170955 | fn3krp            | -0.183544623 | -0.156282547 | -0.395153052 | -0.231090781 |
| ENSDART00000170983 | lmnb2             | 0.185291183  | 0.299339057  | 0.275121803  | 0.118770566  |
| ENSDART00000170993 | afmid             | -0.391958822 | -0.311185654 | -0.48659874  | -0.071120804 |
| ENSDART00000170998 | tnrc6c2           | -0.257719977 | -0.319066529 | -0.317919253 | -0.242876098 |
| ENSDART00000171003 | CU929447.2        | 0.254824338  | 0.430023304  | 0.328306359  | 0.219409854  |
| ENSDART00000171006 | hpcal4            | -0.435402713 | -0.198074705 | -0.466665783 | -0.338540363 |
| ENSDART00000171013 | tenm4             | -0.557784731 | -0.616815207 | -0.086642376 | -0.101260046 |
| ENSDART00000171014 | ptprfa            | -0.231763582 | -0.479834972 | -0.30404021  | -0.129420632 |
| ENSDART00000171021 | rab3ip            | 0.020022814  | 0.162794734  | 0.729696081  | 0.694579303  |
| ENSDART00000171041 | tceb3             | -0.063048764 | -0.305499385 | -0.056078786 | -0.065276347 |
| ENSDART00000171058 | pald1a            | 0.52269022   | 0.19158808   | 0.108215435  | -0.186659053 |
| ENSDART00000171072 | SEC14L1           | -0.099969512 | -0.17692833  | -0.270780357 | -0.178232632 |
| ENSDART00000171073 | tox2              | -0.713271279 | -0.691854818 | -0.08505138  | -0.233730891 |
| ENSDART00000171090 | sowahd            | 0.56962557   | 0.415649109  | 0.184768671  | -0.065367372 |
| ENSDART00000171091 | zeb2b             | -0.344020449 | -0.404143226 | -0.222307379 | 0.140992606  |
| ENSDART00000171113 | mibp              | 1.815496184  | 1.851942075  | 2.237510566  | 0.882565569  |
| ENSDART00000171114 | si:dkey-18j18.3   | -5.054012109 | -5.054146995 | -1.846245188 | 0.223162792  |
| ENSDART00000171137 | pdia3             | 0.328843285  | 0.182764859  | 0.141869644  | -0.049588298 |
| ENSDART00000171169 | numbl             | -0.199436908 | -0.274498759 | 0.034564123  | 0.069477302  |
| ENSDART00000171178 | nlrc3l            | 0.061705987  | 0.093907561  | 0.374016309  | -0.032278843 |
| ENSDART00000171179 | si:ch211-241b2.5  | 1.438237825  | 1.596241839  | 1.013176313  | 0.055616895  |
| ENSDART00000171182 | FO704914.1        | -0.372200999 | -0.770608409 | -0.45129487  | -0.014659406 |
| ENSDART00000171188 | si:ch211-165d12.4 | 3.380342846  | 2.16159833   | 1.938428841  | 0.89654506   |
| ENSDART00000171202 | clrn1             | -0.342498627 | -0.174544267 | -0.411984605 | -0.164186516 |
| ENSDART00000171215 | slc6a3            | -0.667608441 | -0.754783262 | -0.446986408 | -0.343120625 |
| ENSDART00000171235 | calua             | 0.528206357  | 0.591046444  | 0.528298198  | 0.210887316  |
| ENSDART00000171237 | kcnj2b            | -0.406552715 | -0.524353506 | -0.661059283 | -0.393570981 |
| ENSDART00000171244 | ssh2b             | -0.244446722 | -0.139215381 | 0.546963377  | 0.2356201    |
| ENSDART00000171252 | man2a1            | 0.336633303  | 0.148045387  | -0.143242682 | -0.284272741 |
| ENSDART00000171270 | ckap2l            | 0.621565842  | 0.655006082  | 0.304610509  | 0.072068559  |
| ENSDART00000171288 | magi2b            | -0.2674353   | -0.525609031 | -0.078206648 | -0.00532511  |
| ENSDART00000171289 | si:ch73-158p21.2  | 0.432663487  | 0.278579945  | 0.160816438  | 0.272943666  |
| ENSDART00000171306 | stxbp1a           | -0.614795684 | -0.539858263 | -0.126841305 | 0.057169963  |
| ENSDART00000171316 | si:dkey-262j3.7   | -0.307347885 | -0.015370213 | 0.260259549  | 0.204989519  |
| ENSDART00000171320 | dcp2              | -0.072540161 | -0.060086595 | -0.320231159 | -0.153613562 |
| ENSDART00000171335 | map4k4            | 0.106316233  | 0.336083411  | 0.398966135  | 0.337674059  |
| ENSDART00000171336 | dyrk4             | 0.12887622   | -0.629074584 | -0.893898922 | 0.00387951   |
| ENSDART00000171343 | FP102192.1        | 1.130120264  | 0.697435719  | 1.760333984  | 0.139610385  |
| ENSDART00000171345 |                   | 2.015201895  | 1.694676698  | 1.017867776  | 0.711389392  |
| ENSDART00000171354 | nt5c2l1           | 0.533832785  | 0.693578932  | 1.620342483  | 0.507169588  |
| ENSDART00000171359 | asic1b            | -0.583045866 | -0.669491195 | -0.186449925 | 0.212036898  |
| ENSDART00000171380 | top1mt            | 0.983277478  | 1.316957074  | 1.074308725  | 0.32139594   |
| ENSDART00000171382 | epb41l3a          | -0.440465797 | 0.150336785  | 0.618974575  | 0.751984906  |
| ENSDART00000171393 | efr3a             | 0.028329226  | -0.20834437  | -0.54511994  | -0.110508442 |
| ENSDART00000171396 | pts               | 0.27960755   | 0.015420592  | -0.484687881 | -0.407740441 |
| ENSDART00000171417 | si:ch73-299h12.3  | -0.719381589 | -0.760232748 | -0.826233659 | -0.863901262 |

|                    |                      |              |              |              |              |
|--------------------|----------------------|--------------|--------------|--------------|--------------|
| ENSDART00000171426 | pdzph1               | -0.416069913 | -0.411889039 | -0.457121209 | -0.221062124 |
| ENSDART00000171430 | BX908401.1           | 0.558597997  | 0.282396796  | 0.308082083  | 0.228227036  |
| ENSDART00000171433 | tnni1d               | 0.40952122   | 3.032354782  | 4.009528497  | 2.823338021  |
| ENSDART00000171456 | rasgrf2b             | -0.231105558 | -0.246992498 | -0.342919918 | -0.045608772 |
| ENSDART00000171466 |                      | -1.418832616 | -2.063774189 | -0.38972739  | -0.735471862 |
| ENSDART00000171490 | PCDH8                | -0.518696681 | -0.628285802 | -0.168709969 | 0.408565003  |
| ENSDART00000171494 | ssbp2                | -0.298958691 | -0.315587827 | -0.028952479 | 0.152638316  |
| ENSDART00000171496 | CDK18                | -0.371495713 | -0.374286185 | -0.433391037 | -0.282164654 |
| ENSDART00000171497 | mfap4                | 2.949855284  | 1.228743784  | 1.366529806  | 0.589539203  |
| ENSDART00000171506 |                      | -0.792662919 | -0.4993043   | 0.08528346   | 0.180572156  |
| ENSDART00000171523 | CABZ01089030.1       | -0.303576632 | -0.51118876  | -0.528168137 | -0.25789403  |
| ENSDART00000171524 | CABZ01062422.1       | 0.017851166  | 0.325269151  | 0.385529332  | 0.004388505  |
| ENSDART00000171571 | FAM184A (1 of many)  | -0.84950254  | -1.068290057 | 0.155587747  | 0.361779982  |
| ENSDART00000171589 | hrasa                | 0.543862541  | 0.913653251  | 0.982614467  | 0.767663706  |
| ENSDART00000171594 | mef2aa               | -0.649844171 | -0.685014218 | -0.301258241 | -0.003741614 |
| ENSDART00000171624 | Metazoa_SRP          | 1.040618727  | 2.218519951  | 2.250692356  | 1.867352594  |
| ENSDART00000171634 | galnt13              | 0.214607397  | -0.183374464 | -0.358548812 | -0.056557988 |
| ENSDART00000171639 | prkacbb              | -0.216859972 | -0.333993863 | -0.380485937 | -0.232933535 |
| ENSDART00000171674 | abhd8a               | -0.482604068 | -0.462135418 | 0.077091696  | 0.23737745   |
| ENSDART00000171678 | ubb                  | 0.267730806  | 0.139565922  | 0.302768617  | 0.039108167  |
| ENSDART00000171683 | GABRG1               | -0.455034367 | -0.392373746 | -0.437520168 | -0.270886274 |
| ENSDART00000171686 | si:ch211-225h24.2    | 0.00451198   | -0.128666512 | -0.443683785 | -0.077894977 |
| ENSDART00000171687 | XPO5                 | 0.143122457  | 0.173342903  | 0.297288837  | 0.170261463  |
| ENSDART00000171691 | psmc3                | 0.15503219   | 0.267774928  | 0.185121834  | -0.000325126 |
| ENSDART00000171696 | sergef               | -0.83692277  | -0.920324583 | -0.711315475 | -0.040508735 |
| ENSDART00000171701 | osmr                 | 1.90654589   | 2.08952232   | 1.976929325  | 1.246005697  |
| ENSDART00000171704 | soul4                | -0.335441282 | -0.335430337 | -0.104813252 | -0.062286587 |
| ENSDART00000171711 | gpsm1a               | -0.376386863 | -0.294884117 | -0.277096957 | -0.079488929 |
| ENSDART00000171728 | FQ323156.1           | -0.3925045   | -0.548422409 | -0.578285827 | -0.21374206  |
| ENSDART00000171743 | sypa                 | -0.458751426 | -0.455626528 | -0.334063629 | -0.142465032 |
| ENSDART00000171749 | TMEM150A (1 of many) | -0.745537318 | -0.560172793 | -0.666392254 | -0.39318407  |
| ENSDART00000171762 | arhgef11             | -0.293734421 | -0.490220654 | -0.20280274  | 0.049910063  |
| ENSDART00000171777 | syt7b                | -0.587310767 | -0.899783938 | -0.612333236 | -0.170082745 |
| ENSDART00000171789 |                      | 1.544321358  | 1.350890859  | 1.388203792  | 0.786947546  |
| ENSDART00000171806 | ppt1                 | 0.388846083  | 0.447401215  | 0.166979487  | -0.03135359  |
| ENSDART00000171811 | grk1b                | 2.834746901  | 2.005283407  | 2.325249515  | 3.603901667  |
| ENSDART00000171815 | abcc8b               | 0.00284442   | -0.044162256 | -0.758748776 | -0.514944979 |
| ENSDART00000171823 | cdc14ab              | -0.17216976  | -0.3147465   | -0.385013143 | -0.20236803  |
| ENSDART00000171824 | si:ch211-227e10.2    | -0.663768919 | -0.251157559 | -0.496668883 | -0.404241953 |
| ENSDART00000171830 | uchl1                | 0.751081517  | 1.035376191  | 0.855000132  | 0.800147781  |
| ENSDART00000171854 | si:ch1073-303d10.1   | -0.079667744 | -0.472299802 | -0.615705243 | -0.228401157 |
| ENSDART00000171867 | fnbp1l               | 0.402488238  | 0.925028089  | 0.937640279  | 0.578874881  |
| ENSDART00000171868 | sgut1                | -0.438334002 | -0.252211506 | -0.468859348 | -0.232780566 |
| ENSDART00000171871 | cbfb                 | 0.41950513   | 0.366762581  | 0.672082991  | 0.461647583  |
| ENSDART00000171882 | CABZ01088567.1       | 0.407931     | 0.822027708  | 0.621405649  | 0.24977578   |
| ENSDART00000171891 | iqsec2a              | -0.225046822 | -0.287658971 | -0.015287221 | 0.082198509  |
| ENSDART00000171900 | oit3                 | -0.401327729 | -0.441180087 | -0.161045426 | -0.008695935 |
| ENSDART00000171913 | AL773558.1           | -0.541466018 | -0.593947031 | -0.853404048 | -0.564731615 |
| ENSDART00000171915 | FO834898.1           | -0.059070074 | -0.319253855 | -0.196715718 | -0.032975583 |
| ENSDART00000171916 | myom2a               | 1.227196118  | 3.513600791  | 3.806244226  | 2.767902474  |
| ENSDART00000171935 | brpf3a               | -0.333420883 | -0.26685281  | -0.204490748 | -0.091216638 |

|                    |                   |              |              |              |              |
|--------------------|-------------------|--------------|--------------|--------------|--------------|
| ENSDART00000171941 | si:dkeyp-53d3.5   | 2.939427931  | 3.522632269  | 3.599150168  | 3.695003344  |
| ENSDART00000171948 | zgc:172282        | -0.447105187 | -0.64749442  | -0.36124568  | -0.081452365 |
| ENSDART00000171951 | slit2             | -0.546372344 | -0.56571293  | -0.270916548 | -0.035288929 |
| ENSDART00000171965 | galnt18a          | -0.106299358 | -0.103906292 | -0.35180024  | -0.003683356 |
| ENSDART00000171975 | si:ch211-230g14.6 | -0.465912508 | -0.525802535 | -0.259029045 | -0.276627158 |
| ENSDART00000171977 | ddx52             | 0.350026309  | 0.214664704  | 0.228079892  | -0.041434316 |
| ENSDART00000171996 | myl12.1           | 0.233861142  | 0.344330245  | 0.260508491  | 0.06338781   |
| ENSDART00000172014 | actr3             | 3.712429453  | 3.456018148  | 3.177836674  | 3.174953878  |
| ENSDART00000172016 | prox1a            | -0.34053446  | -0.257376891 | -0.299242567 | -0.073418723 |
| ENSDART00000172019 | CU694219.1        | -0.358471879 | -0.088786066 | -0.423165049 | -1.570028426 |
| ENSDART00000172022 | dpysl4            | 0.270457415  | 0.912051797  | 1.185681882  | 0.874375314  |
| ENSDART00000172045 | zgc:73340         | -0.432558368 | -0.571519732 | -0.606453829 | -0.389736033 |
| ENSDART00000172069 | snrpg             | 0.452166641  | 0.481061823  | 0.338564477  | 0.058821342  |
| ENSDART00000172076 | hook1             | -0.040243255 | -0.111929437 | -0.520350092 | -0.090216969 |
| ENSDART00000172080 | ttbk2a            | 1.110423963  | 2.886130551  | 3.128605088  | 3.572451241  |
| ENSDART00000172084 | si:ch73-236j9.2   | 0.095305984  | 0.48958329   | 0.505184662  | 0.37060971   |
| ENSDART00000172095 |                   | -1.418832616 | -2.063774189 | -0.38972739  | -0.735471862 |
| ENSDART00000172102 | elof1             | 0.045486466  | -0.036149641 | -0.262027739 | -0.168895436 |
| ENSDART00000172114 | calm3a            | -0.154349916 | -0.209222212 | -0.409530683 | -0.13969668  |
| ENSDART00000172128 | sez6l             | -0.457515145 | -0.649880208 | -0.297003963 | -0.214224661 |
| ENSDART00000172135 | sh3pxd2b          | 0.68385955   | 0.832942161  | 0.517904326  | 0.090715158  |
| ENSDART00000172149 | sh3rf2            | -0.359308533 | -0.521296357 | -0.501584275 | -0.200324498 |
| ENSDART00000172166 | NDUFC1            | -0.092745693 | -0.325133407 | -0.417118078 | -0.256060161 |
| ENSDART00000172190 | ajap1             | -0.155573908 | -0.463634934 | -0.533953643 | -0.131876486 |
| ENSDART00000172201 | trpv1             | 0.412354182  | 0.082280105  | 0.061779394  | -0.254715035 |
| ENSDART00000172207 | si:ch211-9d9.1    | 1.222547885  | 0.297262625  | 0.271454205  | -2.80261928  |
| ENSDART00000172215 | si:ch211-39i2.2   | 1.017534105  | 1.848603057  | 1.465869245  | 0.571196451  |
| ENSDART00000172218 | nsmfb             | -0.786748472 | -1.480880504 | -0.428989171 | -0.523180434 |
| ENSDART00000172232 | sv2a              | -0.325501969 | -0.478402861 | -0.246153159 | 0.031695064  |
| ENSDART00000172233 | si:ch73-55i23.1   | 0.636981625  | 0.696972269  | 1.179674288  | 0.207432569  |
| ENSDART00000172241 | nsdhl             | 1.591273733  | 3.017393364  | 3.100136405  | 2.442907405  |
| ENSDART00000172251 | creb3l1           | -0.33540662  | 0.193573394  | -4.078076569 | -0.842213331 |
| ENSDART00000172267 | KCNV1             | -0.730291266 | -0.683938113 | -0.423486953 | -0.317970814 |
| ENSDART00000172274 | kifap3a           | 2.52903808   | 3.896963711  | 3.83143073   | 1.193936031  |
| ENSDART00000172279 | cavin4a           | -0.061511418 | 1.266222675  | 1.14872392   | 0.602916509  |
| ENSDART00000172285 | arf3b             | -0.358958449 | -0.189620663 | 0.143810604  | 0.126356011  |
| ENSDART00000172294 | ctps1b            | -0.150552652 | -0.426760874 | -0.523567714 | -0.150809326 |
| ENSDART00000172300 | slc38a4           | -0.096535094 | -0.136897206 | -0.74017911  | -0.38118016  |
| ENSDART00000172301 | tk1               | 1.414413476  | 0.945772512  | 1.08664013   | 0.593080412  |
| ENSDART00000172305 | lsm10             | 0.431922906  | 0.307479396  | 0.650924826  | 0.415051794  |
| ENSDART00000172307 | UBE2M             | -0.026970956 | 0.061666236  | 0.299772523  | 0.276955817  |
| ENSDART00000172309 | twsg1a            | 0.181135796  | 0.092573769  | -0.368073769 | -0.475343856 |
| ENSDART00000172310 | zbtb4             | -0.365422353 | -0.277101341 | -0.237436935 | -0.247791483 |
| ENSDART00000172327 | taok1b            | -0.323110832 | -0.519144421 | -0.19684291  | 0.126510211  |
| ENSDART00000172329 | CABZ01084963.1    | -0.076477014 | -0.479017439 | -0.153366972 | -0.215592031 |
| ENSDART00000172335 | cpne3             | 0.169360614  | 0.301780948  | 0.100312932  | -0.018165212 |
| ENSDART00000172336 | cabp2a            | -0.40143904  | -0.491969769 | -0.23184904  | -0.50001549  |
| ENSDART00000172337 | rhot1a            | -3.878236672 | -5.686158747 | -0.665991717 | -0.822715826 |
| ENSDART00000172338 | cav1              | 0.970717786  | 1.027469024  | 1.102211393  | 0.680419868  |
| ENSDART00000172357 | tmem132a          | -0.246648072 | -0.102389273 | -0.224742481 | -0.519178406 |
| ENSDART00000172367 | sgip1b            | -0.158702965 | -0.245738955 | -0.177100693 | 0.051555171  |



|                    |                   |              |              |              |              |
|--------------------|-------------------|--------------|--------------|--------------|--------------|
| ENSDART00000172372 | Metazoa_SRP       | 1.431390172  | 1.797550169  | 1.401344471  | 0.830250287  |
| ENSDART00000172373 | ompa              | -0.333379791 | -0.33389964  | -0.383107757 | -0.229559723 |
| ENSDART00000172408 | arhgap11a         | 0.695056063  | 0.093403628  | 0.066933123  | 0.263951638  |
| ENSDART00000172409 | il6st             | 2.752703405  | 3.785571298  | 4.464867139  | 2.64892811   |
| ENSDART00000172428 | FO704797.2        | 0.17851052   | -0.259187206 | -0.513103189 | -0.127941479 |
| ENSDART00000172430 | si:dkey-203a12.3  | 2.592857339  | 1.584928476  | 2.433004816  | 1.57133529   |
| ENSDART00000172433 | BX323031.2        | 0.315248431  | 0.209012025  | -0.000555571 | 0.219130901  |
| ENSDART00000172437 | dgkab             | -0.119408916 | -0.169975589 | -0.468807215 | -0.381241335 |
| ENSDART00000172441 | lima1a            | 0.350368785  | 0.588496789  | 0.46589541   | 0.178939257  |
| ENSDART00000172444 | ATG2A             | 0.113672015  | 0.132095473  | 0.291990145  | 0.186645397  |
| ENSDART00000172460 | FO904965.1        | -0.329411304 | -0.282535563 | -0.05279435  | 0.008365177  |
| ENSDART00000172465 | gnb1b             | -0.429380032 | -0.139749463 | 0.050389396  | 0.071415749  |
| ENSDART00000172496 | add3a             | -0.173242509 | -0.314301562 | -0.183893521 | -0.110146899 |
| ENSDART00000172510 | elavl4            | 1.054519465  | 1.174247457  | 1.078840874  | 0.691066079  |
| ENSDART00000172515 | bzw1b             | 0.541293913  | 0.477440982  | 0.388001444  | -0.287525957 |
| ENSDART00000172547 | insb              | -0.25337952  | -0.120760297 | 0.28326011   | 0.898589828  |
| ENSDART00000172552 | dyrk2             | -1.00865602  | -4.097564958 | -0.48472737  | -0.263450257 |
| ENSDART00000172555 | rps15a            | 0.386196694  | 0.41469411   | 0.231657808  | -0.026260131 |
| ENSDART00000172565 | Metazoa_SRP       | 1.391513514  | 1.064695711  | 1.082381989  | 0.312800391  |
| ENSDART00000172566 | ptpro             | -0.439852276 | 0.14868548   | 0.772757137  | 0.551836031  |
| ENSDART00000172624 | chn1              | -0.429491719 | -0.379515323 | -0.144891996 | -0.16828013  |
| ENSDART00000172634 | ryr3              | -1.057085419 | -1.586723574 | -0.163110923 | 0.331797887  |
| ENSDART00000172638 | gria3a            | -0.308989617 | -0.39028425  | -0.157465183 | 0.147319123  |
| ENSDART00000172645 | unc5da            | -0.375739047 | -0.576943357 | -0.183677467 | 0.03667029   |
| ENSDART00000172661 | nrgnb             | -0.441646104 | -0.659637875 | -0.590118296 | -0.403632798 |
| ENSDART00000172662 | fam96a            | -0.029501914 | -0.191990056 | -0.34693921  | -0.272376792 |
| ENSDART00000172664 | kirrel3l          | -0.579597094 | -0.334224423 | -0.00269739  | 0.256102934  |
| ENSDART00000172672 | angptl2b          | -0.321678324 | -0.001662718 | -0.330394771 | -0.841768465 |
| ENSDART00000172689 | drd4a             | -0.269065132 | -0.433761644 | -0.356034882 | -0.090259185 |
| ENSDART00000172703 | trnau1apa         | 3.525550379  | 4.03135258   | 2.121100592  | 1.557105834  |
| ENSDART00000172766 | psd3l             | -0.547513249 | -0.802641524 | -0.228472689 | 0.098980101  |
| ENSDART00000172775 | tegt              | -0.040616632 | 0.038263838  | -0.257883683 | -0.248241903 |
| ENSDART00000172811 | ubap1lb           | 0.254294803  | -0.127702895 | -0.996786994 | -0.222342304 |
| ENSDART00000172821 | PHLPP2            | -0.058117589 | -0.547864216 | -0.458033727 | -0.042436898 |
| ENSDART00000172862 | kcnj14            | -0.439592228 | -0.323667837 | -0.482461949 | -0.197270237 |
| ENSDART00000172874 | kcnj10a           | -0.114134993 | -0.28596151  | -0.331658021 | -0.188992319 |
| ENSDART00000172892 | CR769769.2        | 0.615702823  | 0.344273677  | 0.373739938  | 0.336791427  |
| ENSDART00000172893 | si:ch211-207g17.2 | 1.081136407  | 0.564546524  | -0.069203481 | -0.244746802 |
| ENSDART00000172899 | hp1bp3            | -0.268836711 | -0.197039259 | -0.254153947 | -0.074858409 |
| ENSDART00000172910 | map1aa            | -0.286879932 | 0.224710371  | 0.48760533   | 0.689542868  |
| ENSDART00000172913 | si:ch73-368j24.11 | 0.642626776  | 0.575984051  | 0.848181147  | 0.478362255  |
| ENSDART00000172939 | ptp4a1            | 0.526587293  | 0.493567323  | 0.439467476  | 0.194682023  |
| ENSDART00000172944 | FO681390.1        | -0.061230657 | -0.175829366 | -0.634551101 | -0.148743958 |
| ENSDART00000172948 | TSC22D3           | 0.014403639  | -0.423782958 | -0.297835045 | -0.190699463 |
| ENSDART00000172953 | rpl29             | 0.354363113  | 0.457581567  | 0.206775836  | 0.026974968  |
| ENSDART00000172975 | slc6a1b           | 0.350767184  | 0.274634418  | 0.412920252  | 0.546226395  |
| ENSDART00000172988 | si:zfos-80g12.1   | -1.526714169 | -3.752673892 | -1.791649817 | -0.447660424 |
| ENSDART00000173000 | zgc:113184        | 0.45806543   | 0.269621809  | 0.185268488  | 0.0480413    |
| ENSDART00000173011 | GRXCR1            | 0.401804428  | 0.903685752  | 1.561252834  | 1.150514684  |
| ENSDART00000173017 | atp2b2            | -0.485284755 | -0.507921276 | -0.213758166 | 0.050306247  |
| ENSDART00000173020 | utrn              | -0.19228303  | -0.092812836 | -0.536357201 | -0.334471005 |

|                    |                    |              |              |              |              |
|--------------------|--------------------|--------------|--------------|--------------|--------------|
| ENSDART00000173052 | map7d2b            | 0.261433378  | 1.055987677  | 1.048743858  | 0.7752628    |
| ENSDART00000173056 | arap3              | -0.20638853  | -0.271205037 | -0.427111789 | -0.285607029 |
| ENSDART00000173060 | rph3ab             | -0.917567753 | -0.595167162 | 0.673778236  | 0.835535825  |
| ENSDART00000173072 | AKAP13 (1 of many) | -0.027726032 | -0.260210303 | -0.309219665 | 0.02079698   |
| ENSDART00000173083 | FO704610.1         | -0.146610059 | -0.222029359 | -0.309017936 | -0.101957892 |
| ENSDART00000173095 | spred3             | -0.542534865 | -0.320111081 | -0.209054264 | -0.626959008 |
| ENSDART00000173098 | gemin6             | 0.181263356  | 0.385271136  | 0.184325919  | 0.274013326  |
| ENSDART00000173108 | gpc3               | -0.979170892 | -0.757011653 | 0.064815285  | 0.413031736  |
| ENSDART00000173109 | nrtm               | -0.527610722 | -0.443827628 | -0.46689713  | -0.285016979 |
| ENSDART00000173113 | si:ch211-129p13.1  | -0.464452233 | -0.696136912 | -0.478469763 | -0.206239945 |
| ENSDART00000173119 | pcdh11             | -0.634370446 | -0.732192902 | -0.531501202 | -0.25060062  |
| ENSDART00000173126 | klhl4              | -0.765151123 | -0.487744119 | -0.047554388 | -0.018081928 |
| ENSDART00000173133 | utr                | -0.11206335  | -0.324597481 | -0.223274112 | -0.197393841 |
| ENSDART00000173134 | BX571952.1         | -0.551010684 | -0.633352911 | -0.460069257 | -0.004126181 |
| ENSDART00000173143 | lrp1aa             | 0.006114382  | -0.023577911 | -0.261635578 | -0.555062861 |
| ENSDART00000173145 | rpl29              | 0.32197024   | 0.280412475  | 0.068293144  | -0.107729465 |
| ENSDART00000173149 | dgkab              | -0.056470672 | -0.094386691 | -0.40550946  | -0.281791004 |
| ENSDART00000173169 | pclob              | -0.241926883 | -0.695024268 | -0.666850982 | -0.322920156 |
| ENSDART00000173192 | pcdh1b             | -0.448371004 | -0.996454455 | -0.461950735 | 0.179661768  |
| ENSDART00000173195 | zgc:153146         | 2.291177749  | 2.913913042  | 2.827467346  | 2.606942928  |
| ENSDART00000173210 | kcnab2a            | -0.633080178 | -0.760216594 | -0.295624932 | -0.02803528  |
| ENSDART00000173222 | gpr101             | -0.442714055 | -0.312795744 | -0.164884489 | -0.01182968  |
| ENSDART00000173228 | slc6a11b           | -1.626653664 | -2.205227269 | -0.432079303 | 0.774903159  |
| ENSDART00000173237 | mid2               | -0.115282743 | -0.310001722 | -0.367171215 | -0.341782639 |
| ENSDART00000173257 | si:dkey-97l20.6    | -0.30598121  | -0.315922233 | -0.586659381 | -0.206936738 |
| ENSDART00000173267 | tmem255a           | -0.148788206 | 0.632219165  | 0.395055581  | 0.430496671  |
| ENSDART00000173301 | sfxn5b             | -0.333126218 | -0.098925577 | -0.061350927 | 0.22562903   |
| ENSDART00000173305 | si:ch1073-456m8.1  | 0.206580067  | 0.587987288  | 0.667691948  | 0.271613596  |
| ENSDART00000173346 | ptp4a1             | 0.667015175  | 0.565109215  | 0.920811931  | 0.492033169  |
| ENSDART00000173386 | cacna1da           | -0.09786225  | -0.344688682 | -0.169985603 | 0.048564501  |
| ENSDART00000173398 | pcdh19             | -0.247538527 | -0.756226364 | 0.093604274  | 0.28627895   |
| ENSDART00000173400 | FP236327.1         | -0.107319508 | -0.233503644 | -0.613884847 | -0.314094176 |
| ENSDART00000173421 | lingo2a            | -0.727375414 | -0.584905703 | -0.169839849 | 0.100856447  |
| ENSDART00000173423 | pcdh11             | -0.206659469 | -0.430916352 | -0.19368235  | 0.107223081  |
| ENSDART00000173430 | pfklb              | -0.150367408 | -0.216221217 | -0.597100494 | -0.348773684 |
| ENSDART00000173436 | si:dkey-280e21.3   | 0.740189589  | 1.373516231  | 1.387529232  | 0.976737711  |
| TRANSGENE          |                    | 3.62113341   | 4.519443337  | 2.76591932   | 1.041497447  |

Table S2. Differentially expressed transcripts (1% FDR) clustered based on temporal expression pattern.

| Ensembl ID         | zebrafish gene symbol | padj        | LFC: 2dpi-0dpi | LFC: 4dpi-0dpi | LFC: 7dpi-0dpi | LFC: 12dpi-0dpi | cluster name              |
|--------------------|-----------------------|-------------|----------------|----------------|----------------|-----------------|---------------------------|
| ENSDART00000001678 | adam8a                | 0.001434846 | 1.934717518    | 1.802449426    | 1.368408045    | -0.21633234     | growth toward the midline |
| ENSDART00000002453 | acsl4b                | 0.004676707 | 0.68259347     | 0.484852434    | 0.056581739    | -0.183902113    | growth toward the midline |
| ENSDART00000002556 | mrt04                 | 0.019563666 | 0.589078781    | 0.447556222    | 0.419365915    | 0.058126759     | growth toward the midline |
| ENSDART00000002595 | rpl21                 | 0.004824695 | 0.36985839     | 0.3662658      | 0.201825483    | -0.004056179    | growth toward the midline |
| ENSDART00000002741 | itrip1                | 0.000474192 | 0.724094373    | 0.694272578    | 0.397322653    | -0.062298334    | growth toward the midline |
| ENSDART00000002945 | NPC2 (1 of many)      | 0.001006824 | 3.182180208    | 2.136779184    | 1.408480393    | 0.09501531      | growth toward the midline |
| ENSDART00000003001 | rpl23a                | 0.003882278 | 0.412203534    | 0.396855245    | 0.244635942    | -0.052563059    | growth toward the midline |
| ENSDART00000003314 | nusap1                | 0.035951327 | 0.825744448    | 0.908244509    | 0.647266522    | 0.3629471       | growth toward the midline |
| ENSDART00000004065 | zgc:91909             | 0.00334615  | 0.594004329    | 0.47164071     | 0.350756766    | 0.105236702     | growth toward the midline |
| ENSDART00000004392 | fklbp9                | 0.004270117 | 0.758370209    | 0.583896419    | 0.427971915    | -0.289954899    | growth toward the midline |
| ENSDART00000004664 | tram1                 | 0.002818463 | 0.410276471    | 0.318086482    | 0.103470746    | -0.163408872    | growth toward the midline |
| ENSDART00000004780 | man2b1                | 0.002528575 | 0.352578138    | 0.195228445    | 0.062298599    | -0.189062834    | growth toward the midline |
| ENSDART00000006381 | psen2                 | 0.01158873  | 0.338086739    | 0.204848015    | 0.067000942    | -0.024014416    | growth toward the midline |
| ENSDART00000007642 | zgc:110239            | 2.33589E-05 | 0.831334701    | 0.383173307    | 0.0742642      | -0.168536089    | growth toward the midline |
| ENSDART00000007827 | spra                  | 0.013245259 | 0.429147243    | 0.5653912      | 0.349944557    | -0.12347627     | growth toward the midline |
| ENSDART00000008373 | fosl1a                | 0.001576361 | 0.78271954     | 0.570182098    | 0.226810387    | -0.332448721    | growth toward the midline |
| ENSDART00000008807 | rpl12                 | 0.006094081 | 0.258765274    | 0.397825613    | 0.190712058    | -0.053203791    | growth toward the midline |
| ENSDART00000009392 | esco2                 | 0.01613952  | 1.573729566    | 0.878542321    | 0.358323204    | 0.160150267     | growth toward the midline |
| ENSDART00000009241 | rpl35                 | 0.001788569 | 0.440738233    | 0.45418276     | 0.310964715    | 0.055658665     | growth toward the midline |
| ENSDART00000009343 | pyroxd2               | 0.025731308 | 0.778556587    | 0.730253969    | 0.295998209    | 0.188824159     | growth toward the midline |
| ENSDART00000010104 | crtap                 | 0.001353924 | 0.225199403    | 0.115819527    | -0.25953471    | -0.588755148    | growth toward the midline |
| ENSDART00000010246 | ugt1ab                | 0.02087678  | 1.578212697    | 1.169819697    | 0.509084599    | -0.046131609    | growth toward the midline |
| ENSDART00000010261 | pno1                  | 0.000847723 | 0.396735226    | 0.379415162    | 0.20506239     | -0.042887698    | growth toward the midline |
| ENSDART00000011570 | zgc:101716            | 0.028885428 | 0.810996291    | 0.904458728    | 0.54949556     | 0.44631829      | growth toward the midline |
| ENSDART00000011863 | hdlbpa                | 0.002972631 | 0.44689202     | 0.322223522    | 0.244841165    | -0.050194137    | growth toward the midline |
| ENSDART00000013409 | prmt3                 | 0.000336326 | 0.583250552    | 0.486757337    | 0.420985526    | -0.028812313    | growth toward the midline |
| ENSDART00000014871 | akr7a3                | 0.017769648 | 0.445881137    | 0.133128629    | 0.063605049    | 0.058812872     | growth toward the midline |
| ENSDART00000015034 | blvrb                 | 0.000281817 | 0.700108065    | 0.61517331     | 0.539502173    | -0.031641171    | growth toward the midline |
| ENSDART00000015841 | gstt1b                | 0.000149381 | 0.844147349    | 0.559916631    | 0.300223231    | -0.404935077    | growth toward the midline |
| ENSDART00000016814 | fmn12a                | 0.0006946   | 0.496433192    | 0.213976057    | -0.143298216   | -0.634969289    | growth toward the midline |
| ENSDART00000016864 | slc35f6               | 0.023157709 | 0.392001078    | 0.280281029    | 0.187768856    | 0.16995993      | growth toward the midline |
| ENSDART00000016890 | EIF6                  | 0.049349672 | 0.391815405    | 0.223439355    | 0.155230229    | 0.056706473     | growth toward the midline |
| ENSDART00000017153 | hps4                  | 0.00377485  | 0.574215829    | 0.524013089    | 0.377950963    | 0.050651634     | growth toward the midline |
| ENSDART00000017176 | dkc1                  | 0.026351976 | 0.45463167     | 0.261033913    | 0.276931433    | 0.02149911      | growth toward the midline |
| ENSDART00000018261 | akr1b1                | 0.003041627 | 1.00051996     | 0.934286328    | 0.670184322    | 0.161867768     | growth toward the midline |
| ENSDART00000018304 | mcm3                  | 0.010839093 | 0.755786584    | 0.39595981     | 0.332438259    | 0.197655199     | growth toward the midline |
| ENSDART00000018461 | vmp1                  | 0.013233841 | 0.430900752    | 0.323245721    | 0.184562524    | 0.049764543     | growth toward the midline |
| ENSDART00000018523 | ahcy                  | 0.020417188 | 0.45208938     | 0.606696476    | 0.316876579    | -0.072835379    | growth toward the midline |
| ENSDART00000018625 | napab                 | 0.000529346 | 0.495528529    | 0.395594582    | 0.072464634    | -0.31666363     | growth toward the midline |
| ENSDART00000019003 | psmd10                | 0.013692958 | 0.510870261    | 0.455922769    | 0.143258659    | 0.040691699     | growth toward the midline |
| ENSDART00000019149 | rpl7                  | 0.003098732 | 0.429749031    | 0.41708455     | 0.235093103    | -0.015027688    | growth toward the midline |
| ENSDART00000019937 | gadd45ga              | 0.013812134 | 0.98351774     | 1.304995817    | 0.165178221    | 0.462881948     | growth toward the midline |
| ENSDART00000020167 | slc16a9a              | 0.000935288 | 0.895506163    | 0.735954298    | 0.591907512    | -0.466816888    | growth toward the midline |
| ENSDART00000020252 | pdia6                 | 0.043796537 | 0.374033372    | 0.009098395    | 0.091775115    | 0.023604955     | growth toward the midline |
| ENSDART00000020311 | rpl27                 | 0.001676296 | 0.430086554    | 0.381494789    | 0.182914397    | -0.034120883    | growth toward the midline |
| ENSDART00000020541 | lipf                  | 0.000672564 | 0.528006329    | 0.723139512    | 0.390796686    | -0.03933789     | growth toward the midline |
| ENSDART00000020655 | psma5                 | 0.023717938 | 0.424960543    | 0.53028483     | 0.342202642    | 0.090736505     | growth toward the midline |
| ENSDART00000020810 | sdcbp2                | 0.003682945 | 0.429533724    | 0.242026939    | 0.181097661    | -0.126536592    | growth toward the midline |
| ENSDART00000021037 | hspca4a               | 0.022587526 | 0.42074258     | 0.381012047    | 0.243421438    | 0.132816774     | growth toward the midline |
| ENSDART00000021069 | rpl38                 | 0.001331938 | 0.561397297    | 0.414839383    | 0.25425723     | 0.049186317     | growth toward the midline |
| ENSDART00000021299 | nmd3                  | 0.014686352 | 0.353895501    | 0.176055483    | 0.10015969     | 0.031379837     | growth toward the midline |
| ENSDART00000021788 | pbk                   | 0.043154442 | 1.438031033    | 0.973567544    | 0.667760742    | 0.195406357     | growth toward the midline |
| ENSDART00000021798 | fabp11a               | 0.000424137 | 3.578286828    | 1.692122399    | 1.073895347    | -0.266988673    | growth toward the midline |
| ENSDART00000021950 | mthfd1b               | 0.002507467 | 1.089156306    | 0.599589593    | 0.18588711     | -0.096895618    | growth toward the midline |
| ENSDART00000022307 | atic                  | 4.11188E-05 | 1.012801143    | 0.518350872    | 0.289570342    | -0.11925608     | growth toward the midline |
| ENSDART00000022562 | rhogb                 | 0.013807548 | 0.97771224     | 0.454579503    | 0.287206454    | -0.277565993    | growth toward the midline |
| ENSDART00000022586 | lrrc40                | 0.005807456 | 0.466457292    | 0.391920358    | 0.288821604    | -0.015697706    | growth toward the midline |
| ENSDART00000022634 | acp2                  | 0.004900248 | 0.356430058    | 0.295051752    | 0.030540215    | -0.026401831    | growth toward the midline |
| ENSDART00000022765 | riok1                 | 0.014326582 | 0.429965951    | 0.477495547    | 0.301061387    | 0.021181676     | growth toward the midline |
| ENSDART00000023463 | uap11l                | 0.015884799 | 0.706648736    | 0.512468414    | 0.225773419    | -0.015907861    | growth toward the midline |
| ENSDART00000024194 | kif11                 | 0.007786427 | 1.409119378    | 1.269759488    | 0.810392576    | 0.401186663     | growth toward the midline |
| ENSDART00000024208 | nutf2l                | 0.001633797 | 0.951686549    | 0.855710394    | 0.537014601    | -0.220899011    | growth toward the midline |
| ENSDART00000024316 | mcm5                  | 0.041407171 | 1.292009744    | 0.913737369    | 0.774968175    | 0.275487022     | growth toward the midline |
| ENSDART00000025096 | larp1b                | 0.002618468 | 0.593217694    | 0.576647108    | 0.472990072    | 0.196836578     | growth toward the midline |
| ENSDART00000025229 | adi1                  | 0.000305093 | 0.582007509    | 0.274560712    | -0.200617197   | -0.21352575     | growth toward the midline |
| ENSDART00000025912 | si:key-32n7.4         | 0.055404088 | 0.676729111    | 0.251567535    | 0.290364244    | 0.056388056     | growth toward the midline |
| ENSDART00000026145 | AMOTL1                | 0.001213585 | 1.0586494      | 0.570711762    | 0.741896115    | 0.335943589     | growth toward the midline |
| ENSDART00000026178 | kif4                  | 0.009637478 | 0.630775369    | 0.400037801    | 0.195646982    | 0.069714171     | growth toward the midline |
| ENSDART00000026492 | flncb                 | 0.000598789 | 1.767414623    | 1.156524725    | 0.931280558    | 0.481368808     | growth toward the midline |
| ENSDART00000027393 | ckmt1                 | 0.033377037 | 0.722688207    | 0.598583347    | 0.435615456    | 0.204934783     | growth toward the midline |
| ENSDART00000029133 | snu13b                | 0.001170697 | 0.760760317    | 0.56984098     | 0.429270049    | -0.029914173    | growth toward the midline |
| ENSDART00000029380 | bnip4                 | 0.000434317 | 0.50246171     | 0.517948631    | -0.062532971   | -0.337429982    | growth toward the midline |

|                    |            |             |             |              |              |              |                           |
|--------------------|------------|-------------|-------------|--------------|--------------|--------------|---------------------------|
| ENSDART00000029387 | ppan       | 0.025186512 | 0.365110957 | 0.289310564  | 0.234072786  | 0.008675203  | growth toward the midline |
| ENSDART00000030125 | znhit3     | 0.032553766 | 0.760210037 | 0.691966223  | 0.487369205  | 0.388320697  | growth toward the midline |
| ENSDART00000030890 | hmox1a     | 0.001147964 | 2.623035746 | 1.043671484  | 1.096486903  | 0.061370069  | growth toward the midline |
| ENSDART00000031047 | cd63       | 0.001899261 | 1.025048213 | 0.521327717  | 0.067995805  | -0.605090068 | growth toward the midline |
| ENSDART00000031498 | ccna2      | 0.001588425 | 1.569664461 | 1.378683751  | 0.895010724  | 0.581055828  | growth toward the midline |
| ENSDART00000032290 | esy1a      | 0.001565956 | 0.414133861 | 0.186544426  | 0.071532791  | -0.03493067  | growth toward the midline |
| ENSDART00000032498 | tspan36    | 2.7529E-05  | 1.455763612 | 0.805559086  | 0.192569945  | -0.715366149 | growth toward the midline |
| ENSDART00000033386 | ocstamp    | 0.013948629 | 2.954317372 | 2.548446344  | 2.458244526  | 1.328553982  | growth toward the midline |
| ENSDART00000033574 | slc24a5    | 0.002170738 | 0.460212086 | 0.054768672  | -0.306746704 | -1.141417252 | growth toward the midline |
| ENSDART00000033663 | rps21      | 0.005949363 | 0.311890725 | 0.366197651  | 0.105076559  | -0.038309008 | growth toward the midline |
| ENSDART00000033761 | glb1       | 0.021559058 | 0.347409105 | 0.187375641  | 0.031649312  | 0.073918812  | growth toward the midline |
| ENSDART00000033980 | lims1      | 0.002007275 | 0.497849916 | 0.369061975  | 0.247283344  | -0.174205881 | growth toward the midline |
| ENSDART00000034248 | rab32a     | 0.001863533 | 0.364170748 | 0.270180665  | -0.161567701 | -0.659765413 | growth toward the midline |
| ENSDART00000034377 | cpa5       | 0.000100528 | 2.043914839 | 0.12107472   | 0.19928898   | 0.161423339  | growth toward the midline |
| ENSDART00000034829 | rrp12      | 0.002170738 | 0.494057186 | 0.423927766  | 0.372142811  | 0.099318986  | growth toward the midline |
| ENSDART00000034850 | dbi        | 0.002568245 | 1.011739121 | 0.830016329  | 0.708552366  | 0.209278197  | growth toward the midline |
| ENSDART00000035093 | col9a2     | 0.002649033 | 0.360349924 | 0.265960604  | -0.052354611 | -0.707154609 | growth toward the midline |
| ENSDART00000035670 | polr2eb    | 0.0033491   | 0.35113115  | 0.294169174  | 0.063963778  | -0.045691283 | growth toward the midline |
| ENSDART00000035739 | tmem134    | 0.001247858 | 0.246242014 | 0.369929781  | 0.082611565  | -0.161334554 | growth toward the midline |
| ENSDART00000035944 | clic5a     | 0.068646243 | 2.554130845 | 1.311062136  | 1.150965478  | 0.646568675  | growth toward the midline |
| ENSDART00000036729 | spi1b      | 0.004358158 | 0.910663058 | 0.717004711  | 0.095052493  | -0.117318513 | growth toward the midline |
| ENSDART00000037224 | cs14a.2    | 0.003240086 | 0.549538616 | 0.553010386  | 0.34149596   | -0.057482802 | growth toward the midline |
| ENSDART00000038202 | cndp2      | 0.001490782 | 1.63370988  | 0.725493655  | 0.197899383  | -0.10985912  | growth toward the midline |
| ENSDART00000038301 | gnpda2     | 0.008531138 | 0.314221876 | 0.240267665  | 0.128522583  | -0.033807169 | growth toward the midline |
| ENSDART00000038696 | flvcr2b    | 0.014130752 | 1.475160998 | 0.41510575   | 0.393658072  | -0.063620422 | growth toward the midline |
| ENSDART00000038888 | hsdl2      | 0.018248495 | 0.331360296 | 0.293802861  | 0.248668235  | 0.085382052  | growth toward the midline |
| ENSDART00000038990 | jak1       | 0.006256994 | 0.414591598 | 0.220201928  | 0.070657217  | -0.102548961 | growth toward the midline |
| ENSDART00000039206 | rps23      | 0.004633654 | 0.388349294 | 0.322594165  | 0.070172062  | -0.095059659 | growth toward the midline |
| ENSDART00000039312 | ipo4       | 0.002755913 | 0.472349209 | 0.340323729  | 0.32654819   | 0.07839591   | growth toward the midline |
| ENSDART00000040434 | asah1b     | 0.000524004 | 0.563509259 | 0.420868789  | -0.056225927 | -0.32971968  | growth toward the midline |
| ENSDART00000040771 | rpl34      | 0.005202212 | 0.291435523 | 0.406434571  | 0.222752448  | -0.006604457 | growth toward the midline |
| ENSDART00000040827 | ncaph2     | 0.025606413 | 0.654906877 | 0.777407912  | 0.63027477   | 0.226543553  | growth toward the midline |
| ENSDART00000040900 | baxb       | 0.005486177 | 0.66837016  | 0.786823818  | 0.515591205  | 0.094501002  | growth toward the midline |
| ENSDART00000041114 | psmb2      | 0.010442784 | 0.343581501 | 0.272779677  | 0.256301247  | -0.006269993 | growth toward the midline |
| ENSDART00000041504 | tescb      | 0.004106215 | 0.44458368  | -0.282095189 | 0.067591772  | -0.116025945 | growth toward the midline |
| ENSDART00000041992 | dhrs12     | 0.001102685 | 0.12282475  | 0.60945999   | -0.222288782 | -0.248821854 | growth toward the midline |
| ENSDART00000042250 | rap1b      | 0.003665031 | 0.339690926 | 0.041784403  | 0.019413921  | -0.132436477 | growth toward the midline |
| ENSDART00000043173 | rpl18      | 0.005040201 | 0.389153851 | 0.347510342  | 0.235541148  | 0.00423952   | growth toward the midline |
| ENSDART00000043666 | hs1bp3     | 0.003138642 | 1.060777617 | 0.463082325  | 0.168627927  | -0.515305865 | growth toward the midline |
| ENSDART00000043678 | apobec2b   | 0.024850978 | 1.815363093 | 0.931239114  | 0.794076282  | 0.812995775  | growth toward the midline |
| ENSDART00000044238 | zgc:92066  | 0.000787471 | 1.060411872 | 1.124461317  | 0.621339815  | 0.051820002  | growth toward the midline |
| ENSDART00000044264 | mmp14b     | 0.018216055 | 0.997152397 | 1.115840894  | 0.915921565  | 0.094130452  | growth toward the midline |
| ENSDART00000044314 | itgav      | 0.004681738 | 0.188708464 | -0.009103257 | -0.190172369 | -0.475418475 | growth toward the midline |
| ENSDART00000044328 | acss1      | 0.000783264 | 0.948368639 | 0.660526303  | 0.176495325  | -0.460639914 | growth toward the midline |
| ENSDART00000045933 | sh3glb1b   | 0.002439392 | 0.424660866 | 0.274153114  | 0.044458674  | -0.153303197 | growth toward the midline |
| ENSDART00000046218 | flnca      | 0.000103226 | 6.980277858 | 6.302871335  | 6.08375751   | 5.531037957  | growth toward the midline |
| ENSDART00000046253 | prkcq      | 0.008130201 | 0.856641094 | 1.199706901  | 0.196829623  | -0.396081861 | growth toward the midline |
| ENSDART00000046268 | pmelb      | 0.000596344 | 0.894230709 | 0.185058494  | -0.384535315 | -0.811085128 | growth toward the midline |
| ENSDART00000047191 | glb1l      | 0.017715642 | 1.329711044 | 0.552831622  | 0.213363411  | -0.364178392 | growth toward the midline |
| ENSDART00000047728 | melk       | 0.061287033 | 0.808255278 | 0.366287521  | 0.23278244   | 0.524042022  | growth toward the midline |
| ENSDART00000048107 | FP102018.1 | 0.000888975 | 0.402516182 | 0.222629184  | -0.14999501  | -0.581967671 | growth toward the midline |
| ENSDART00000049465 | slc19a1    | 0.0055878   | 0.32288456  | 0.126425631  | -0.165912503 | -0.040050165 | growth toward the midline |
| ENSDART00000050399 | npc2       | 0.002939613 | 0.729567353 | 0.287798394  | -0.063690935 | -0.310097689 | growth toward the midline |
| ENSDART00000050847 | GLDC       | 0.017654181 | 0.384969982 | 0.265449522  | 0.198357794  | 0.108750757  | growth toward the midline |
| ENSDART00000051392 | spns3      | 0.001042039 | 1.320734766 | 0.750958136  | 0.798555508  | -0.096372125 | growth toward the midline |
| ENSDART00000051491 | sfrp1a     | 0.001342771 | 0.324084954 | 0.211296795  | -0.122014524 | -1.0775933   | growth toward the midline |
| ENSDART00000051556 | abca1b     | 0.004394152 | 0.962705135 | 0.587027009  | 0.239926413  | -0.279230387 | growth toward the midline |
| ENSDART00000051763 | rps3a      | 0.02114031  | 0.36528781  | 0.402890251  | 0.287932185  | 0.011460462  | growth toward the midline |
| ENSDART00000051906 | ube2c      | 0.012497601 | 1.239012745 | 1.032037835  | 0.553625781  | 0.164264884  | growth toward the midline |
| ENSDART00000052082 | rpl30      | 0.00417836  | 0.377785904 | 0.342931306  | 0.098750304  | -0.086094728 | growth toward the midline |
| ENSDART00000052090 | fuca.1.2   | 0.012864775 | 0.607737239 | 0.489644017  | 0.400376939  | 0.091450373  | growth toward the midline |
| ENSDART00000052104 | fuca.1.1   | 0.006465135 | 0.706031916 | 0.625980807  | 0.554044121  | 0.174374129  | growth toward the midline |
| ENSDART00000052331 | rps20      | 0.004925327 | 0.422414342 | 0.403711723  | 0.215205833  | -0.059084102 | growth toward the midline |
| ENSDART00000052730 | rps13      | 0.00538212  | 0.392793291 | 0.407259594  | 0.231403052  | 0.009148185  | growth toward the midline |
| ENSDART00000052761 | rpl39      | 0.005353377 | 0.335691979 | 0.34926929   | 0.1141905    | -0.000371665 | growth toward the midline |
| ENSDART00000052917 | slc3a2a    | 0.001434846 | 0.509465627 | 0.333845604  | -0.024881296 | -0.285712584 | growth toward the midline |
| ENSDART00000053761 | bms1       | 0.015390643 | 0.415838377 | 0.296751152  | 0.241962107  | 0.100266391  | growth toward the midline |
| ENSDART00000053932 | cbsa       | 0.000261206 | 1.196219296 | 0.806157212  | 0.553945424  | 0.279319174  | growth toward the midline |
| ENSDART00000055287 | zgc:109934 | 0.00013154  | 0.762332695 | 0.487859158  | -0.045189446 | -0.423101752 | growth toward the midline |
| ENSDART00000055328 | nek6       | 0.003694199 | 0.491226657 | 0.428884947  | 0.11516767   | -0.052210357 | growth toward the midline |
| ENSDART00000055428 | cbx7a      | 0.000405977 | 0.780269243 | 0.615351279  | 0.524687311  | -0.270346219 | growth toward the midline |
| ENSDART00000056005 | ascl1a     | 0.032093457 | 1.787445127 | 1.283325532  | 0.749862779  | 0.792492648  | growth toward the midline |
| ENSDART00000056457 | mitfa      | 0.005353377 | 0.929754118 | 0.38849893   | 0.30836176   | -0.311729197 | growth toward the midline |
| ENSDART00000056460 | gbp1       | 0.045564466 | 3.785035011 | 3.151116027  | 3.74676295   | 2.092352698  | growth toward the midline |
| ENSDART00000056686 | mrc1b      | 0.004463264 | 0.993000172 | 0.810204425  | 0.489266441  | -0.068136928 | growth toward the midline |

|                   |                   |              |             |              |              |              |                           |
|-------------------|-------------------|--------------|-------------|--------------|--------------|--------------|---------------------------|
| ENSDART0000058324 | rpz4              | 0.00855067   | 0.754354311 | 0.61115296   | 0.469864295  | -0.17226809  | growth toward the midline |
| ENSDART0000058605 | scpep1            | 0.002139835  | 0.659557613 | 0.259300703  | 0.157418507  | -0.140654612 | growth toward the midline |
| ENSDART0000058665 | kif20bb           | 0.029064716  | 0.867797834 | 0.7305292963 | 0.371647572  | 0.126469391  | growth toward the midline |
| ENSDART0000058774 | havcr1            | 0.002175185  | 1.378230425 | 0.803624411  | 0.332422006  | 0.11017803   | growth toward the midline |
| ENSDART0000059001 | CSAR1             | 0.048093489  | 0.862718576 | 0.211750471  | 0.205995335  | 0.011542683  | growth toward the midline |
| ENSDART0000059013 | sec61b            | 0.022498542  | 0.564454151 | 0.292288284  | 0.352954607  | 0.073391744  | growth toward the midline |
| ENSDART0000059667 | wdr75             | 0.022389941  | 0.34735847  | 0.29669502   | 0.189255306  | 0.039773826  | growth toward the midline |
| ENSDART0000060363 | rpl4              | 0.004878958  | 0.373964359 | 0.396853604  | 0.212646351  | -0.016195336 | growth toward the midline |
| ENSDART0000060444 | rps29             | 0.007150368  | 0.369322836 | 0.397792199  | 0.13443893   | -0.022749507 | growth toward the midline |
| ENSDART0000060745 | uba52             | 0.01809863   | 0.32327466  | 0.351581625  | 0.155851402  | -0.01111286  | growth toward the midline |
| ENSDART0000060765 | nppb              | 0.001237101  | 4.501656565 | 4.501350371  | 1.812509246  | -0.191856821 | growth toward the midline |
| ENSDART0000060773 | taar12b           | 0.025216223  | 2.538886261 | 1.95415769   | 1.735717491  | 1.72259581   | growth toward the midline |
| ENSDART0000060865 | rasa11b           | 0.024284969  | 1.120636523 | 0.769242879  | 0.458217171  | 0.392656742  | growth toward the midline |
| ENSDART0000061736 | si:dkey-4e7.3     | 0.017999639  | 0.80946555  | 0.660586871  | 0.14634027   | 0.03058403   | growth toward the midline |
| ENSDART0000061926 | stx11b.2          | 0.006909332  | 3.447906519 | 2.671571656  | 2.785952697  | 1.680276674  | growth toward the midline |
| ENSDART0000062257 | slc39a1           | 0.003541697  | 0.740781667 | 0.522946282  | 0.350404642  | 0.245154327  | growth toward the midline |
| ENSDART0000062576 | thyn1             | 0.006623227  | 0.902996379 | 0.741810201  | 0.792519989  | 0.219218083  | growth toward the midline |
| ENSDART0000062671 | tuba8l            | 0.009931768  | 1.253108099 | 0.545680562  | 0.42270127   | -0.336104805 | growth toward the midline |
| ENSDART0000062845 | mmp9              | 0.014615758  | 2.08287012  | 1.917473556  | 1.298502519  | -0.06470518  | growth toward the midline |
| ENSDART0000062931 | abracl            | 0.011668571  | 0.878200021 | 0.73529721   | 0.710676136  | 0.289919909  | growth toward the midline |
| ENSDART0000063107 | rpl10a            | 0.003138642  | 0.388498934 | 0.402298329  | 0.17374506   | -0.059011317 | growth toward the midline |
| ENSDART0000063107 | cyp2p7            | 0.024411518  | 0.910849098 | 1.165275545  | 0.616791402  | -0.023701278 | growth toward the midline |
| ENSDART0000063251 | ctsz              | 3.54236E-05  | 1.117383701 | 0.530773826  | 0.448185866  | 0.142841944  | growth toward the midline |
| ENSDART0000063357 | ccnb1             | 0.012018385  | 1.564145903 | 1.350801576  | 0.91228963   | 0.49209964   | growth toward the midline |
| ENSDART0000063764 | si:dkey-5n18.1    | 0.015077117  | 1.420288455 | 0.932190706  | 0.716992196  | -0.355341421 | growth toward the midline |
| ENSDART0000063874 | vamp4             | 0.003602728  | 0.706049434 | 0.688342777  | 0.412447235  | 0.06985511   | growth toward the midline |
| ENSDART0000063953 | zgc:65997         | 0.015420308  | 0.11562047  | 0.484476273  | -0.11592626  | -0.024456549 | growth toward the midline |
| ENSDART0000064113 | abt1              | 0.009820514  | 0.598506286 | 0.454995795  | 0.386684419  | 0.116646594  | growth toward the midline |
| ENSDART0000064511 | il17a/f1          | 0.023872337  | 1.319538931 | 1.072672417  | 0.769667562  | 1.083526716  | growth toward the midline |
| ENSDART0000064657 | stx11a            | 0.006345193  | 1.187636483 | 0.704469765  | 0.33181163   | -0.135694961 | growth toward the midline |
| ENSDART0000064700 | fuca2             | 0.001008722  | 0.436466876 | 0.137195427  | -0.005101419 | -0.171105064 | growth toward the midline |
| ENSDART0000065057 | itgb7             | 0.000118474  | 1.200094562 | 0.885337917  | 0.497721229  | 0.006866552  | growth toward the midline |
| ENSDART0000065183 | cldn2             | 0.000739355  | 0.624880574 | 0.284479914  | -0.382379938 | -0.379228488 | growth toward the midline |
| ENSDART0000065208 | nop16             | 0.021355398  | 0.539941841 | 0.465464987  | 0.330311237  | 0.01578578   | growth toward the midline |
| ENSDART0000065337 | kif20a            | 0.001229585  | 1.518648505 | 1.334799108  | 0.992824147  | 0.572892998  | growth toward the midline |
| ENSDART0000065674 | fybb              | 0.008250091  | 0.68375018  | 0.334314613  | 0.079534024  | -0.242430054 | growth toward the midline |
| ENSDART0000065805 | tspan10           | 0.003267854  | 0.90782785  | 0.406843364  | -0.022479662 | -0.576522773 | growth toward the midline |
| ENSDART0000065817 | pou5f3            | 0.012966692  | 1.443769101 | 1.494882152  | 0.928756649  | 0.660724256  | growth toward the midline |
| ENSDART0000066411 | dlgap5            | 0.003138642  | 1.041688171 | 0.895823709  | 0.540002804  | 0.33349173   | growth toward the midline |
| ENSDART0000066778 | acad11            | 0.000741396  | 0.796145744 | 0.566674022  | 0.216041695  | -0.190350168 | growth toward the midline |
| ENSDART0000067193 | adm2a             | 0.004020103  | 0.4356689   | 0.184728608  | -0.002686414 | -1.106691874 | growth toward the midline |
| ENSDART0000067312 | si:dkey-106n21.1  | 0.003805801  | 0.584969753 | 0.102146183  | -0.031661382 | 0.069325035  | growth toward the midline |
| ENSDART0000067594 | cst14b.1          | 0.003629485  | 1.003408293 | 1.132156972  | 0.601894798  | 0.102871452  | growth toward the midline |
| ENSDART0000067599 | angptl2a          | 0.000103226  | 1.671461404 | 1.166310219  | 0.762115684  | 0.407368061  | growth toward the midline |
| ENSDART0000067678 | zgc:110339        | 0.001560042  | 0.949255799 | 0.562708107  | 0.125395868  | -0.585210787 | growth toward the midline |
| ENSDART0000073846 | si:ch211-122f10.4 | 0.006183684  | 0.620706192 | 0.26696454   | 0.219379439  | -0.011733355 | growth toward the midline |
| ENSDART0000074010 | ubald1b           | 0.002498008  | 0.486188172 | 0.523878559  | 0.246068485  | 0.014830353  | growth toward the midline |
| ENSDART0000074161 | slc4a2b           | 0.000953608  | 0.481685785 | 0.057728735  | -0.200942778 | -0.247347753 | growth toward the midline |
| ENSDART0000074384 | stx4              | 0.006812131  | 0.365157378 | 0.335603422  | 0.150714004  | -0.050227712 | growth toward the midline |
| ENSDART0000074438 | cenpi             | 0.0023769243 | 0.547415003 | 0.708397465  | 0.401862169  | 0.054393549  | growth toward the midline |
| ENSDART0000075028 | rps11             | 0.001443362  | 0.42100484  | 0.441088802  | 0.128015907  | -0.080449898 | growth toward the midline |
| ENSDART0000075262 | cad               | 0.058741505  | 0.41294438  | 0.156970425  | 0.074105835  | 0.04769287   | growth toward the midline |
| ENSDART0000075286 | slc2a15b          | 0.000993187  | 1.023992215 | 0.671159354  | 0.170031714  | -0.73573625  | growth toward the midline |
| ENSDART0000075495 | rpl23             | 0.005969755  | 0.390673252 | 0.341184618  | 0.264108815  | -0.005521244 | growth toward the midline |
| ENSDART0000076030 | fbl               | 0.017381552  | 0.33280558  | 0.192834191  | 0.116054515  | 0.005015438  | growth toward the midline |
| ENSDART0000076636 | fzd2              | 0.002013265  | 0.563199333 | 0.424474998  | 0.171148118  | -0.301884624 | growth toward the midline |
| ENSDART0000077185 | dgat1b            | 0.002147221  | 0.79138422  | 0.60487817   | 0.419420549  | -0.346047138 | growth toward the midline |
| ENSDART0000077259 | ebna1bp2          | 0.007621679  | 0.420936188 | 0.344892308  | 0.188849483  | 0.008127131  | growth toward the midline |
| ENSDART0000077386 | prss16            | 0.000185931  | 0.714972584 | 0.32483027   | 0.071612523  | -0.240875958 | growth toward the midline |
| ENSDART0000077418 | ctsba             | 0.016904127  | 1.550723066 | 1.033464808  | 0.97579905   | 0.475659932  | growth toward the midline |
| ENSDART0000077511 | ccr9a             | 0.000592988  | 1.513300322 | 1.48326526   | 0.981085195  | 0.082724583  | growth toward the midline |
| ENSDART0000077545 | slc7a7            | 5.02856E-05  | 1.304066715 | 0.45830859   | 0.136139102  | 0.056436424  | growth toward the midline |
| ENSDART0000077707 | llph              | 0.006605202  | 0.612018484 | 0.617804437  | 0.382050706  | 0.042759152  | growth toward the midline |
| ENSDART0000077715 | si:dkey-25e12.3   | 0.000947019  | 1.07190149  | 0.953044464  | 0.701373655  | 0.117439727  | growth toward the midline |
| ENSDART0000077834 | rps27.2           | 0.003329747  | 0.365621497 | 0.39961171   | 0.113670294  | -0.081169937 | growth toward the midline |
| ENSDART0000078266 | rsl1d1            | 0.000775831  | 0.351365949 | 0.392552672  | 0.175928217  | -0.070353732 | growth toward the midline |
| ENSDART0000078596 | hspd1             | 0.004163372  | 0.512169965 | 0.358816938  | 0.201006014  | 0.20720259   | growth toward the midline |
| ENSDART0000078634 | EIF5a2            | 0.011846009  | 0.493280465 | 0.485481598  | 0.418411017  | 0.051860815  | growth toward the midline |
| ENSDART0000078647 | si:ch211-201h21.5 | 0.024809879  | 1.148616031 | 0.689283012  | 0.40532037   | 0.049879214  | growth toward the midline |
| ENSDART0000078866 | ifi30             | 0.001277839  | 1.574791131 | 0.896478525  | 0.373397245  | -0.020268978 | growth toward the midline |
| ENSDART0000079222 | chaf1b            | 0.034090908  | 1.242408116 | 0.820706616  | 0.642546621  | 0.111426229  | growth toward the midline |
| ENSDART0000079310 | manba             | 0.003137832  | 0.495609624 | 0.109254813  | 0.005925635  | -0.12409296  | growth toward the midline |
| ENSDART0000079549 | tpte              | 0.002192481  | 0.809167451 | 0.638911968  | 0.260848622  | -0.250321254 | growth toward the midline |
| ENSDART0000079695 | zwilch            | 0.007014909  | 1.159509442 | 0.995361025  | 0.861360163  | 0.105564769  | growth toward the midline |
| ENSDART0000079984 | rpl22l1           | 0.0003783    | 0.678692893 | 0.584241724  | 0.331994973  | -0.011632328 | growth toward the midline |

|                    |                   |             |             |             |              |              |                           |
|--------------------|-------------------|-------------|-------------|-------------|--------------|--------------|---------------------------|
| ENSDART0000080339  | galm              | 0.000273326 | 0.868912331 | 0.484945087 | -0.111697277 | -0.429352779 | growth toward the midline |
| ENSDART0000080377  | aldoca            | 0.036855016 | 2.758856293 | 1.548001605 | 2.09362575   | 1.794239524  | growth toward the midline |
| ENSDART0000080465  | hells             | 0.018490842 | 0.812911201 | 0.936234984 | 0.557478835  | 0.182957003  | growth toward the midline |
| ENSDART0000080523  | itgae.2           | 0.00855067  | 1.067269567 | 0.812178684 | 0.361968863  | 0.003662922  | growth toward the midline |
| ENSDART0000080712  | slc43a3b          | 0.00855067  | 2.109023631 | 1.075213126 | 0.724428131  | -0.154263604 | growth toward the midline |
| ENSDART0000080864  | magt1             | 0.006145665 | 0.441285986 | 0.302582629 | 0.047526992  | -0.172355248 | growth toward the midline |
| ENSDART0000080919  | rpl36a            | 0.000996442 | 0.405736348 | 0.485454355 | 0.225930563  | -0.002722727 | growth toward the midline |
| ENSDART0000081343  | plk1              | 0.006812131 | 1.547304713 | 1.292689538 | 1.02080622   | 0.322979307  | growth toward the midline |
| ENSDART0000081568  | tcf19l            | 0.027985198 | 0.712871286 | 0.397385898 | 0.351815803  | 0.227291981  | growth toward the midline |
| ENSDART0000082011  | lim2.2            | 0.05615844  | 1.304610538 | 0.978295786 | 0.86763989   | 0.856876261  | growth toward the midline |
| ENSDART0000082050  | zgc:174904        | 0.01376164  | 1.977093547 | 1.430607855 | 1.439069833  | 0.228460651  | growth toward the midline |
| ENSDART0000082471  | mfap2             | 0.013128447 | 0.61383585  | 0.779035446 | 0.354750417  | 0.055843134  | growth toward the midline |
| ENSDART0000082517  | rab43             | 0.000993187 | 0.357940531 | 0.212689136 | -0.148032038 | -0.068856369 | growth toward the midline |
| ENSDART0000083033  | sik1              | 0.0147298   | 1.146093805 | 0.631897288 | 0.512350737  | 1.123188354  | growth toward the midline |
| ENSDART0000083126  | cidec             | 0.00067643  | 3.092638419 | 2.402632883 | 1.147285193  | -0.231828568 | growth toward the midline |
| ENSDART0000083294  | nol6              | 0.046592019 | 0.354535252 | 0.232360208 | 0.196448331  | 0.109158776  | growth toward the midline |
| ENSDART0000083810  | sdc4              | 0.000487602 | 0.356242427 | 0.466156404 | 0.190102023  | -0.370187936 | growth toward the midline |
| ENSDART0000084069  | iggap2            | 0.000512675 | 1.059547107 | 0.55852141  | 0.220571876  | -0.354231411 | growth toward the midline |
| ENSDART0000085309  | dpcd              | 0.00270716  | 0.675929667 | 0.665840567 | 0.458693669  | 0.16198721   | growth toward the midline |
| ENSDART0000085764  | PLOD3             | 0.005493417 | 0.414167142 | 0.202506542 | 0.107388816  | -0.10168282  | growth toward the midline |
| ENSDART0000087114  | alg5              | 0.020108219 | 0.317519293 | 0.464842808 | 0.220188706  | 0.059168575  | growth toward the midline |
| ENSDART0000087311  | oca2              | 0.000313682 | 0.449332393 | 0.338475194 | -0.09076694  | -0.174077968 | growth toward the midline |
| ENSDART0000088042  | myo10l3           | 0.014447102 | 0.440398704 | 0.46516816  | 0.325219038  | -0.023584336 | growth toward the midline |
| ENSDART0000088973  | sytl2a            | 0.000317136 | 0.735131572 | 0.479031428 | -0.049007315 | -0.597552798 | growth toward the midline |
| ENSDART0000089158  | rhha1a            | 0.027703711 | 1.15366088  | 0.773436896 | 0.705540127  | -0.035689576 | growth toward the midline |
| ENSDART0000090528  | hmoca             | 7.15704E-05 | 0.570199757 | 0.738551724 | 0.41277501   | -0.074138712 | growth toward the midline |
| ENSDART0000090883  | gpnmb             | 0.001083951 | 1.78024327  | 1.792109343 | 1.484400673  | -0.264951498 | growth toward the midline |
| ENSDART0000091662  | noc2l             | 0.007264334 | 0.778877814 | 0.364993344 | 0.393512667  | -0.105586454 | growth toward the midline |
| ENSDART0000092050  | stab1             | 0.023363274 | 0.830009942 | 0.662655195 | 0.610953846  | 0.245694157  | growth toward the midline |
| ENSDART0000092389  | nup210            | 0.027686308 | 0.743287563 | 0.315006844 | 0.505674911  | 0.088834448  | growth toward the midline |
| ENSDART0000093279  | spi1b             | 0.002640644 | 0.891535687 | 0.563855895 | 0.100587929  | -0.531177734 | growth toward the midline |
| ENSDART0000098545  | tmem150aa         | 0.010056242 | 0.458575321 | 0.166363456 | 0.137813682  | -0.033806431 | growth toward the midline |
| ENSDART0000098970  | lin28a            | 0.050549016 | 3.476899763 | 1.864207832 | 0.92280153   | 0.893269961  | growth toward the midline |
| ENSDART0000099138  | ncf2              | 0.012263789 | 0.590402106 | 0.352177279 | 0.071326562  | -0.071022128 | growth toward the midline |
| ENSDART0000099839  | map2k2b           | 0.04077574  | 4.411409189 | 4.089988152 | 4.160217635  | 3.732217772  | growth toward the midline |
| ENSDART0000099947  | samsn1a           | 0.007966006 | 0.989297054 | 0.26224771  | 0.078735734  | -0.489522484 | growth toward the midline |
| ENSDART0000099978  | pdlim4            | 0.008900663 | 0.618309518 | 0.542995753 | 0.115667653  | -0.045450127 | growth toward the midline |
| ENSDART0000010045  | lgals9l1          | 0.008814877 | 1.730493466 | 0.73620688  | 0.17444521   | -0.331961456 | growth toward the midline |
| ENSDART0000010045  | si:dkey-73n10.1   | 0.0021138   | 1.648347098 | 0.766263068 | 0.204715566  | -0.361349683 | growth toward the midline |
| ENSDART0000010047  | PLIN3             | 0.014485141 | 1.275027857 | 0.887739595 | 0.535269477  | -0.111777778 | growth toward the midline |
| ENSDART00000100813 | rps24             | 0.004853289 | 0.369574152 | 0.327820695 | 0.143165091  | -0.049601165 | growth toward the midline |
| ENSDART00000101037 | nhp2              | 0.003430859 | 0.465910387 | 0.391566586 | 0.240162003  | -0.008355829 | growth toward the midline |
| ENSDART00000101124 | rnaseka           | 0.001851882 | 1.077486687 | 0.59165486  | 0.038549521  | -0.354475184 | growth toward the midline |
| ENSDART00000101143 | mhc1zea           | 0.00820374  | 0.57323499  | 0.526487775 | 0.424884066  | 0.07882824   | growth toward the midline |
| ENSDART00000101319 | zgc:162396        | 0.01098705  | 0.344606585 | 0.405244483 | 0.227818995  | 0.060602938  | growth toward the midline |
| ENSDART00000102062 | timp2b            | 0.000933245 | 0.538603085 | 0.084002119 | -0.039686845 | -0.313946909 | growth toward the midline |
| ENSDART00000102434 | ehhadh            | 0.000776925 | 0.70922182  | 0.453174195 | 0.063745289  | -0.562849237 | growth toward the midline |
| ENSDART00000102459 | rbp2a             | 0.000345998 | 3.492314469 | 2.902874566 | 1.90821276   | 1.340524369  | growth toward the midline |
| ENSDART00000102981 | col8a1a           | 0.017381552 | 1.700212586 | 0.444548046 | 0.772515926  | 0.395334934  | growth toward the midline |
| ENSDART00000103076 | arl8bb            | 0.002876227 | 0.705280948 | 0.466975375 | 0.584557674  | 0.096505859  | growth toward the midline |
| ENSDART00000103368 | rpl22             | 0.006345193 | 0.33350855  | 0.471741899 | 0.142215466  | -0.053336675 | growth toward the midline |
| ENSDART00000103491 | rbp7b             | 0.000751152 | 2.051254968 | 1.285649693 | 0.558375641  | -0.074104197 | growth toward the midline |
| ENSDART00000103602 | lgals2a           | 0.013513343 | 1.886236295 | 1.628346862 | 1.325259297  | 0.487532368  | growth toward the midline |
| ENSDART00000103660 | clcn7             | 0.002459431 | 0.412276024 | 0.162279088 | -0.074638152 | -0.273644307 | growth toward the midline |
| ENSDART00000104519 | stat3             | 0.004480141 | 0.6458865   | 0.459098575 | 0.438501049  | 0.201812376  | growth toward the midline |
| ENSDART00000104687 | pfn2              | 0.00311878  | 0.330558178 | 0.38737784  | 0.240819292  | -0.058450663 | growth toward the midline |
| ENSDART00000104835 | hps5              | 0.005167494 | 0.972059444 | 0.583168765 | 0.57443346   | -0.16192354  | growth toward the midline |
| ENSDART00000105174 | stm               | 0.000739646 | 3.414215545 | 0.041843024 | -0.026881567 | -0.531574221 | growth toward the midline |
| ENSDART00000108581 | si:dkey-17m8.1    | 0.014069453 | 0.789679514 | 0.574820222 | 0.300394764  | -0.045841382 | growth toward the midline |
| ENSDART00000108995 | tex2              | 0.041898142 | 0.515345319 | 0.756490823 | 0.434164856  | 0.106684566  | growth toward the midline |
| ENSDART00000109065 | ccng1             | 0.001754036 | 0.498527324 | 0.814436551 | 0.266438219  | -0.054038693 | growth toward the midline |
| ENSDART00000109416 | smc2              | 0.00879202  | 1.321753383 | 1.108242465 | 0.857262832  | 0.308883411  | growth toward the midline |
| ENSDART00000109432 | cercam            | 0.000991767 | 0.726258015 | 0.540687546 | 0.072936326  | -0.232601995 | growth toward the midline |
| ENSDART00000109464 | g0s2              | 8.33897E-05 | 2.993222325 | 1.499538045 | 0.588261277  | 0.527162957  | growth toward the midline |
| ENSDART00000109752 | serpinh1a         | 0.000595605 | 0.578805227 | 0.380412306 | 0.080680913  | -0.569755212 | growth toward the midline |
| ENSDART00000109831 | BX088653.1        | 0.022613341 | 0.96716269  | 0.47589947  | 0.338658984  | -0.013815104 | growth toward the midline |
| ENSDART00000110270 | pwp2h             | 0.011929276 | 0.562435944 | 0.598132459 | 0.373677258  | 0.062993981  | growth toward the midline |
| ENSDART00000110529 | bub1bb            | 0.018115022 | 1.321570387 | 1.337769105 | 1.007493385  | 0.59867765   | growth toward the midline |
| ENSDART00000110866 | cln5              | 0.001248486 | 0.673394988 | 0.327334357 | 0.152385216  | -0.174612372 | growth toward the midline |
| ENSDART00000110935 | si:ch1073-59l16.1 | 0.005875165 | 1.356882908 | 0.676384004 | 0.249167454  | 0.069788375  | growth toward the midline |
| ENSDART00000111002 | si:ch211-74f19.2  | 0.000220872 | 0.463826256 | 0.294740419 | -0.053551592 | -0.452436201 | growth toward the midline |
| ENSDART00000111140 | rpl29             | 0.009681558 | 0.336664553 | 0.356246951 | 0.105865493  | -0.061220703 | growth toward the midline |
| ENSDART00000111321 | zgc:152830        | 0.001021091 | 0.702895787 | 0.346388089 | 0.27465484   | 0.003141495  | growth toward the midline |
| ENSDART00000111531 | epdl1             | 0.000962755 | 1.357192284 | 1.365774088 | 0.753975689  | 0.235060778  | growth toward the midline |
| ENSDART00000111688 | zgc:109934        | 0.000655075 | 0.61674072  | 0.212807687 | -0.164219088 | -0.482167701 | growth toward the midline |

|                    |                   |             |             |              |              |              |                           |
|--------------------|-------------------|-------------|-------------|--------------|--------------|--------------|---------------------------|
| ENSDART0000011806  | cenpe             | 0.002947105 | 1.006157891 | 0.692740621  | 0.695639634  | 0.175054418  | growth toward the midline |
| ENSDART00000112127 | dnase2b           | 0.000645779 | 0.959684518 | 0.954914684  | 0.226944152  | -0.0439051   | growth toward the midline |
| ENSDART00000112155 | rrm2              | 0.028641638 | 1.131329801 | 1.215867796  | 0.761186289  | 0.339828406  | growth toward the midline |
| ENSDART00000112243 | crif1a            | 0.00448838  | 1.589627089 | 0.916105309  | 0.558277873  | -0.020827681 | growth toward the midline |
| ENSDART00000112470 | ccdc88b           | 0.005891084 | 0.86030789  | 0.601824136  | 0.501988839  | -0.28013627  | growth toward the midline |
| ENSDART00000112653 | wdfy4             | 0.003815452 | 0.841684139 | 0.566530892  | 0.08064366   | -0.41519717  | growth toward the midline |
| ENSDART00000113093 | gba               | 0.00060684  | 0.473554928 | 0.246228233  | -0.028007284 | -0.118288896 | growth toward the midline |
| ENSDART00000113259 | TARBP1            | 0.002686125 | 0.600840202 | 0.638996908  | 0.05884907   | -0.019773553 | growth toward the midline |
| ENSDART00000113470 | inpp5d            | 0.005845428 | 0.955185108 | 0.470897855  | 0.050793817  | -0.341647614 | growth toward the midline |
| ENSDART00000113441 | mylk5             | 2.33589E-05 | 0.7890096   | 0.412195956  | -0.130414718 | -0.622741882 | growth toward the midline |
| ENSDART00000113574 | anln              | 0.001248576 | 1.428520356 | 0.903846206  | 0.598652735  | 0.284032371  | growth toward the midline |
| ENSDART00000113589 | gpx4b             | 0.002390041 | 0.633021831 | -0.10742897  | -0.312510701 | -0.292370818 | growth toward the midline |
| ENSDART00000113673 | scpp5             | 0.009220964 | 1.321767426 | 0.530715467  | 0.931995129  | 0.748355856  | growth toward the midline |
| ENSDART00000113789 | zgc:198419        | 0.012732777 | 1.388791656 | 0.463187117  | 0.161859067  | -0.160692863 | growth toward the midline |
| ENSDART00000114000 | zgc:101663        | 0.003860077 | 0.831482698 | 0.254442158  | 0.060051833  | 0.091105397  | growth toward the midline |
| ENSDART00000114023 | hspb9             | 0.063359837 | 2.157513115 | 1.55136025   | 0.742718373  | 1.461470885  | growth toward the midline |
| ENSDART00000114282 | rpsa              | 0.000461528 | 0.494276409 | 0.531800028  | 0.113194341  | -0.004402994 | growth toward the midline |
| ENSDART00000114410 | wdr62             | 0.02432669  | 0.584622073 | 0.50588924   | 0.329377091  | 0.089655627  | growth toward the midline |
| ENSDART00000114964 | zgc:165573        | 0.000117076 | 0.691787708 | 0.943542464  | 0.634593348  | -0.039695615 | growth toward the midline |
| ENSDART00000115049 | mych              | 6.48692E-06 | 2.666296724 | 2.42380403   | 1.76502541   | 0.819436082  | growth toward the midline |
| ENSDART00000115255 | mcf2l2            | 0.002771387 | 0.795464349 | 0.848343644  | 0.628078884  | 0.002922432  | growth toward the midline |
| ENSDART00000117636 | dre-mir-21-1      | 0.001938223 | 1.553092638 | 1.563315667  | 0.906878174  | 0.77260601   | growth toward the midline |
| ENSDART00000117680 | dre-mir-21-2      | 0.000180784 | 3.366495632 | 3.222859121  | 2.199417673  | 1.472943682  | growth toward the midline |
| ENSDART00000121998 | grwd1             | 0.006122188 | 0.591308312 | 0.087252775  | -0.045976929 | -0.167650618 | growth toward the midline |
| ENSDART00000122238 | tyr               | 0.000536544 | 1.0676401   | 0.617095715  | 0.165901971  | -0.685666733 | growth toward the midline |
| ENSDART00000122288 | ctsla             | 0.000770834 | 0.76727009  | 0.372627978  | 0.369896487  | -0.200637952 | growth toward the midline |
| ENSDART00000122321 | slc33a1           | 0.014050993 | 0.868257035 | 0.839034235  | 0.725290511  | 0.201428784  | growth toward the midline |
| ENSDART00000122407 | cdk1              | 0.003977971 | 1.677931921 | 1.534655447  | 0.824563588  | 0.384011667  | growth toward the midline |
| ENSDART00000122692 | CAB201112317.1    | 0.003971559 | 0.655801165 | 0.399271741  | 0.354973485  | -0.117162708 | growth toward the midline |
| ENSDART00000122768 | CU984579.1        | 0.001277839 | 0.668419525 | 0.524624014  | 0.112892825  | -0.531459653 | growth toward the midline |
| ENSDART00000122898 | phf21b            | 0.008936495 | 0.630758244 | -0.049111481 | 0.173874589  | 0.290793166  | growth toward the midline |
| ENSDART00000122945 | noc2l             | 0.001509592 | 0.680401135 | 0.443128484  | 0.389864365  | 0.196289408  | growth toward the midline |
| ENSDART00000122953 | gnl3              | 0.004847659 | 0.534095037 | 0.261409226  | 0.267291075  | 0.063642911  | growth toward the midline |
| ENSDART00000123002 | nme4              | 0.004429413 | 3.640965481 | 3.577167408  | 3.045307609  | 2.652336979  | growth toward the midline |
| ENSDART00000123117 | ggh               | 0.000844564 | 0.485870455 | 0.424307993  | 0.067357919  | -0.14640404  | growth toward the midline |
| ENSDART00000123473 | Metazoa_SRP       | 0.011135896 | 0.899034068 | 1.683872421  | 0.662894374  | -0.48789514  | growth toward the midline |
| ENSDART00000123544 | tex2              | 0.010129858 | 0.532623113 | 0.735572961  | 0.212010938  | -0.135781649 | growth toward the midline |
| ENSDART00000124367 | si:cabz01074946.1 | 0.002461121 | 1.457343255 | 1.182560392  | 0.713827232  | 0.020183118  | growth toward the midline |
| ENSDART00000124663 | npc2              | 0.000902446 | 1.578129482 | 0.684715762  | 0.389649636  | 0.031719264  | growth toward the midline |
| ENSDART00000124833 | pdccl1            | 0.01245587  | 0.337926893 | 0.21951318   | 0.267535783  | 0.067942864  | growth toward the midline |
| ENSDART00000124868 | lpl               | 0.000214183 | 0.342987533 | -0.032282276 | -0.168396519 | -1.276175937 | growth toward the midline |
| ENSDART00000125097 | si:dkey-126g1.7   | 0.00111498  | 0.825737488 | 0.388125468  | -0.092297047 | -0.324389582 | growth toward the midline |
| ENSDART00000125178 | eif5a             | 0.003534272 | 0.322397945 | 0.394023524  | 0.161340886  | -0.011483865 | growth toward the midline |
| ENSDART00000125430 | pprc1             | 8.24104E-05 | 1.538620876 | 1.109491459  | 0.874206496  | 0.220876028  | growth toward the midline |
| ENSDART00000125753 | rpl22             | 0.00115719  | 0.364344172 | 0.362576681  | 0.16140506   | -0.121749389 | growth toward the midline |
| ENSDART00000126229 | rps7              | 0.004986552 | 0.396514179 | 0.373862291  | 0.136780142  | -0.080022773 | growth toward the midline |
| ENSDART00000126417 | bri3              | 0.002005251 | 0.500014173 | 0.414528928  | 0.11265957   | -0.17961569  | growth toward the midline |
| ENSDART00000126780 | rnaset2           | 0.000371877 | 0.561676509 | 0.243610345  | -0.050562112 | -0.093659569 | growth toward the midline |
| ENSDART00000126978 | acadl             | 0.002156175 | 0.512070362 | 0.266918423  | -0.034640916 | -0.111553388 | growth toward the midline |
| ENSDART00000127277 | pum3              | 0.018496255 | 0.522076564 | 0.375606403  | 0.43721492   | 0.160017235  | growth toward the midline |
| ENSDART00000127350 | enpp1             | 0.000451785 | 1.121109181 | 0.817391101  | 0.578924138  | 0.065420517  | growth toward the midline |
| ENSDART00000127496 | lox1              | 0.000342667 | 0.412088952 | 0.133411325  | -0.193765804 | -0.987510306 | growth toward the midline |
| ENSDART00000127753 | adam15            | 0.005335064 | 0.405103987 | 0.059018909  | -0.196195339 | -0.053874543 | growth toward the midline |
| ENSDART00000127982 | suox              | 0.014022061 | 0.48894768  | 0.565232546  | 0.460591806  | 0.13079859   | growth toward the midline |
| ENSDART00000128049 | hunk              | 0.016504069 | 0.851411376 | 0.241049411  | 0.130293149  | 0.977016396  | growth toward the midline |
| ENSDART00000128246 | polr1c            | 0.013474932 | 0.52692078  | 0.422008081  | 0.272814737  | 0.11358433   | growth toward the midline |
| ENSDART00000128488 | e2f8              | 0.003382652 | 3.852661131 | -0.929008264 | 3.252279997  | 2.01178299   | growth toward the midline |
| ENSDART00000128550 | palb2             | 0.009615324 | 0.912196863 | 1.171643148  | 0.786370898  | 0.077481484  | growth toward the midline |
| ENSDART00000128613 | rps15a            | 0.004826213 | 0.315521947 | 0.355667698  | 0.260468714  | -0.049823228 | growth toward the midline |
| ENSDART00000128743 | tmem214           | 0.02086388  | 0.301583498 | 0.153317199  | 0.10691428   | 0.053655055  | growth toward the midline |
| ENSDART00000128786 | pyya              | 0.000403881 | 0.897714064 | 0.120108152  | -0.15783225  | -0.181132487 | growth toward the midline |
| ENSDART00000128917 | rps4x             | 0.011474173 | 0.379768803 | 0.358465257  | 0.299276991  | 0.035010431  | growth toward the midline |
| ENSDART00000129155 | vmp1              | 1.77791E-05 | 3.054036254 | 2.972129495  | 2.202758828  | 1.232955319  | growth toward the midline |
| ENSDART00000129380 | ppp5c             | 0.000402095 | 0.718884884 | 0.082309464  | 0.464958134  | 0.512508903  | growth toward the midline |
| ENSDART00000129617 | atp6ap1b          | 0.000657061 | 0.602272356 | 0.200096368  | -0.075510461 | -0.466117163 | growth toward the midline |
| ENSDART00000129903 | mfsd10            | 0.000409421 | 0.819604016 | 0.72451413   | 0.409438046  | 0.004032617  | growth toward the midline |
| ENSDART00000129919 | TIFA              | 0.001882493 | 0.580552682 | 0.759337474  | 0.369383589  | -0.101109572 | growth toward the midline |
| ENSDART00000129963 | rbp1              | 0.001296944 | 1.30707657  | 0.844804596  | -0.023243783 | -0.809227723 | growth toward the midline |
| ENSDART00000130131 | suit6b1           | 0.013901532 | 0.679202914 | 0.436031956  | 0.32900324   | -0.176606639 | growth toward the midline |
| ENSDART00000130297 | atg16l2           | 0.036864554 | 0.527142084 | 0.480414213  | 0.279348799  | 0.207971893  | growth toward the midline |
| ENSDART00000130494 | moxd1             | 0.001779714 | 0.536918295 | 0.137560293  | -0.344113602 | -0.82692019  | growth toward the midline |
| ENSDART00000130601 | CAB201020840.1    | 0.002663982 | 1.211268037 | 0.754343565  | 0.351699193  | -0.297623866 | growth toward the midline |
| ENSDART00000130604 | ssuh2.4           | 0.003590782 | 0.995807077 | 0.517001744  | 0.13232339   | -0.007643053 | growth toward the midline |
| ENSDART00000130648 | scarb2c           | 0.030497275 | 0.530119641 | 0.364624401  | 0.255215167  | -0.022903408 | growth toward the midline |
| ENSDART00000130911 | cmklr1            | 0.011725523 | 1.293061027 | 1.016453103  | 0.21085461   | 0.074156746  | growth toward the midline |

|                    |                   |             |             |              |              |              |                           |
|--------------------|-------------------|-------------|-------------|--------------|--------------|--------------|---------------------------|
| ENSDART00000131217 | ippk              | 0.009000055 | 0.31853123  | 0.426685761  | 0.198265799  | 0.012388457  | growth toward the midline |
| ENSDART00000131241 | CD53              | 0.022148005 | 1.613639378 | 1.480348694  | 1.150180939  | 0.900907437  | growth toward the midline |
| ENSDART00000131319 | ctps1a            | 0.008283592 | 0.387589066 | 0.225454863  | 0.161786406  | -0.016402726 | growth toward the midline |
| ENSDART00000131400 | CR792453.3        | 0.001585773 | 2.47650448  | 0.829837833  | -0.069994818 | -0.405416724 | growth toward the midline |
| ENSDART00000131558 | zgc:103438        | 0.001133915 | 0.587891191 | 0.925990315  | 0.240143957  | -0.080675365 | growth toward the midline |
| ENSDART00000131661 | rps9              | 0.01002859  | 0.491211514 | 0.443239408  | 0.342502062  | -0.078353052 | growth toward the midline |
| ENSDART00000131694 | selenbp1          | 0.000844564 | 0.440307718 | 0.23934875   | 0.219921774  | -0.162883702 | growth toward the midline |
| ENSDART00000131724 | pld3              | 0.002957541 | 0.801498613 | 0.654598157  | 0.377873753  | 0.229417497  | growth toward the midline |
| ENSDART00000131802 | si:dkey-204f11.64 | 0.010173835 | 0.501807484 | 0.364460777  | 0.066146426  | -0.103454568 | growth toward the midline |
| ENSDART00000131966 | AL929520.1        | 0.003243686 | 1.864305398 | 1.102319083  | 0.530092783  | 0.456970098  | growth toward the midline |
| ENSDART00000132216 | paox1             | 0.005824405 | 0.706860126 | 0.311306251  | -0.007602467 | -0.279227462 | growth toward the midline |
| ENSDART00000132637 | rab34a            | 0.004827977 | 0.251888735 | 0.316357959  | 0.030371007  | -1.217256649 | growth toward the midline |
| ENSDART00000132660 | polr3gla          | 0.007082106 | 0.823813849 | 0.325249077  | 0.007723106  | -0.291644484 | growth toward the midline |
| ENSDART00000132742 | apoc1             | 0.007655029 | 0.900470905 | 0.457797087  | -0.066389631 | 0.150028097  | growth toward the midline |
| ENSDART00000132830 | stoml3b           | 0.039723869 | 2.594772138 | 1.896323147  | 1.645470476  | 1.013599137  | growth toward the midline |
| ENSDART00000133109 | rps28             | 0.000937145 | 0.456862734 | 0.459372965  | 0.307002895  | 0.056264372  | growth toward the midline |
| ENSDART00000133167 | si:dkey-98f17.5   | 0.012693562 | 0.605842267 | 0.54718235   | 0.319480313  | 0.041690788  | growth toward the midline |
| ENSDART00000133304 | npm1a             | 0.000878399 | 1.159038348 | 0.761096985  | 0.663684243  | 0.261874194  | growth toward the midline |
| ENSDART00000133375 | si:dkey-30c15.17  | 0.00181079  | 0.981163755 | 0.773615181  | 0.451221931  | -0.42308326  | growth toward the midline |
| ENSDART00000133404 | rps24             | 0.000717268 | 0.584478639 | 0.636503255  | 0.16891132   | -0.309462265 | growth toward the midline |
| ENSDART00000133517 | fosl1b            | 3.29362E-06 | 2.958627889 | 2.652355797  | 1.322528527  | 0.313643003  | growth toward the midline |
| ENSDART00000133517 | si:dkey-228b2.5   | 0.032645202 | 0.6930874   | 0.410660128  | 0.386710557  | 0.222079502  | growth toward the midline |
| ENSDART00000133659 | ncapg             | 0.042253127 | 0.759144886 | 0.927669912  | 0.449671959  | 0.278225274  | growth toward the midline |
| ENSDART00000133934 | rps9              | 0.033833708 | 0.75844303  | 0.709617891  | 0.420926612  | 0.393006212  | growth toward the midline |
| ENSDART00000133946 | si:dkey-147f3.8   | 0.003898333 | 1.477973714 | 1.681506394  | 1.170700784  | -0.068341199 | growth toward the midline |
| ENSDART00000134189 | npm1a             | 0.015751923 | 1.523433306 | 1.012610127  | 1.305980875  | 0.439289484  | growth toward the midline |
| ENSDART00000134206 | hspb8             | 0.001438131 | 0.868767381 | 0.59923642   | 0.380053431  | 0.101288698  | growth toward the midline |
| ENSDART00000134404 | si:ch211-158d24.4 | 0.024003814 | 0.479480538 | 0.856462378  | 0.502566478  | -0.11398241  | growth toward the midline |
| ENSDART00000134819 | slc5a6a           | 2.95145E-05 | 0.44313334  | -0.037657655 | -0.159985236 | -0.577627715 | growth toward the midline |
| ENSDART00000134941 | prc1b             | 0.0242075   | 1.557351387 | 1.026365943  | 0.57100162   | 0.47167284   | growth toward the midline |
| ENSDART00000135032 | si:dkey-57a22.11  | 0.026714705 | 1.01281435  | 1.486077838  | 0.644934957  | 0.560278535  | growth toward the midline |
| ENSDART00000135238 | dok2              | 0.013959384 | 1.480525707 | 0.841647962  | 0.697333529  | 0.138703296  | growth toward the midline |
| ENSDART00000135472 | zgc:86764         | 0.036021217 | 1.170468948 | 0.97326651   | 0.792803713  | 0.492808604  | growth toward the midline |
| ENSDART00000135517 | cenpf             | 0.003777754 | 1.006357007 | 0.930294184  | 0.598168756  | 0.318387864  | growth toward the midline |
| ENSDART00000135719 | si:ch211-171h4.6  | 0.033435193 | 1.187005549 | 0.373648016  | 0.271137881  | -0.125827965 | growth toward the midline |
| ENSDART00000135888 | rrp9              | 0.002433479 | 0.649352382 | 0.396806051  | 0.419459571  | 0.067410678  | growth toward the midline |
| ENSDART00000136382 | gadd45ba          | 0.000960205 | 1.037707985 | 1.186135766  | 0.645465362  | 0.508629     | growth toward the midline |
| ENSDART00000136383 | cd99              | 0.001367004 | 0.67248236  | 1.035021667  | 0.666974643  | -0.164650894 | growth toward the midline |
| ENSDART00000136543 | tnni4b.1          | 0.007654107 | 1.504503498 | 0.982879899  | 0.857598266  | -0.145526765 | growth toward the midline |
| ENSDART00000136722 | cdkn1a            | 0.000598084 | 1.083504495 | 0.97819224   | 0.258587523  | 0.060123909  | growth toward the midline |
| ENSDART00000136779 | entpd5b           | 0.002650976 | 0.819562392 | 0.580844217  | 0.174817773  | -0.04896424  | growth toward the midline |
| ENSDART00000136835 | gpr84             | 0.003982134 | 0.70622544  | 1.83343809   | -0.153052934 | -0.427967202 | growth toward the midline |
| ENSDART00000136865 | cfp               | 0.000230274 | 0.329536618 | 0.225136408  | -0.193120136 | -0.891420593 | growth toward the midline |
| ENSDART00000137019 | cmklr1            | 7.26498E-05 | 1.293423342 | 0.826870113  | 0.435422926  | 0.179038361  | growth toward the midline |
| ENSDART00000137373 | si:ch211-266i6.3  | 0.000114847 | 1.973293451 | 1.253220206  | 0.772689981  | 0.242956342  | growth toward the midline |
| ENSDART00000137858 | alpk2             | 0.024455662 | 0.667374473 | 0.189664169  | 0.047615444  | -0.048884335 | growth toward the midline |
| ENSDART00000137973 | grna              | 0.005201666 | 1.322360375 | 0.965948715  | 0.567189356  | -0.062803655 | growth toward the midline |
| ENSDART00000137984 | SBNO2 (1 of many) | 0.001847086 | 0.66540874  | 0.705510404  | 0.683617676  | -0.079102756 | growth toward the midline |
| ENSDART00000138527 | rab20             | 0.009820514 | 0.632157851 | 0.410164386  | 0.278506263  | 0.009483031  | growth toward the midline |
| ENSDART00000138747 | urb2              | 0.019322869 | 0.51682098  | 0.426109616  | 0.379169845  | 0.148916896  | growth toward the midline |
| ENSDART00000138996 | si:ch211-214p13.9 | 0.003686476 | 1.396990228 | 1.323446174  | 0.865221946  | -0.306555509 | growth toward the midline |
| ENSDART00000139087 | lgmn              | 2.59942E-05 | 0.782730519 | 0.338051823  | 0.153128345  | -0.09953272  | growth toward the midline |
| ENSDART00000139124 | ckba              | 0.004373845 | 1.776728636 | 1.213212461  | 1.201789834  | 0.178980804  | growth toward the midline |
| ENSDART00000139659 | si:dkey-222f2.7   | 0.007791135 | 1.108120911 | 0.818052369  | 0.396214124  | -0.100365974 | growth toward the midline |
| ENSDART00000139839 | rblmx             | 0.034811028 | 0.438924108 | 0.178102249  | 0.089667681  | 0.22023097   | growth toward the midline |
| ENSDART00000140086 | SUN2              | 0.001030626 | 0.64389802  | 0.258658486  | -0.305248612 | -0.209793481 | growth toward the midline |
| ENSDART00000140523 | mrc1b             | 0.000638552 | 0.693910087 | 0.60918831   | 0.270261416  | -0.09789336  | growth toward the midline |
| ENSDART00000140667 | spna2             | 0.034218044 | 0.558956985 | 0.663728247  | 0.276626138  | 0.347556663  | growth toward the midline |
| ENSDART00000140776 | CR391940.1        | 0.013366808 | 0.57109507  | 0.234979352  | 0.004616304  | -0.046528801 | growth toward the midline |
| ENSDART00000140788 | gbb1              | 0.014906425 | 3.129821614 | 2.838243862  | 2.757243294  | 2.490411238  | growth toward the midline |
| ENSDART00000140874 | seph              | 0.005866285 | 0.619876107 | 0.651122471  | 0.195858296  | -0.082542729 | growth toward the midline |
| ENSDART00000140920 | prom1b            | 0.039913243 | 0.88825196  | 0.404698565  | 0.393910982  | 0.372363663  | growth toward the midline |
| ENSDART00000140970 | si:ch73-52p7.1    | 0.011521596 | 1.046367332 | 0.798731839  | 0.265928239  | -0.108652338 | growth toward the midline |
| ENSDART00000141142 | mvp               | 0.001130894 | 1.187603651 | 1.369710798  | 0.919014152  | 0.045597494  | growth toward the midline |
| ENSDART00000141188 | st3gal3b          | 0.000470359 | 0.577420785 | 0.203550656  | -0.28232291  | -0.213031688 | growth toward the midline |
| ENSDART00000141657 | anxa4             | 0.003268346 | 0.870599992 | 0.703638401  | 0.563849009  | -0.254549515 | growth toward the midline |
| ENSDART00000141676 | rpl12             | 0.0451272   | 0.410901536 | 0.227715625  | 0.271640237  | 0.155083239  | growth toward the midline |
| ENSDART00000141714 | nupr1             | 0.022150836 | 1.321058122 | 1.103287011  | 0.703763985  | 0.083130869  | growth toward the midline |
| ENSDART00000142088 | si:ch211-218c6.8  | 0.009300169 | 1.058750612 | 0.593589729  | 0.534639469  | 0.071525268  | growth toward the midline |
| ENSDART00000142104 | cep162            | 0.025259321 | 0.409390298 | 0.286359079  | 0.288581786  | 0.16808044   | growth toward the midline |
| ENSDART00000142389 | cracr2ab          | 0.002199978 | 1.038814867 | 1.254276576  | 0.507748466  | -0.396339594 | growth toward the midline |
| ENSDART00000142422 | tgm2l             | 0.026925307 | 1.901086414 | 0.665689502  | 0.275506536  | 0.14002471   | growth toward the midline |
| ENSDART00000142467 | si:ch211-199g17.2 | 0.017327178 | 2.796012298 | 2.177853709  | 2.464842477  | 1.654064057  | growth toward the midline |
| ENSDART00000143066 | ube2e1            | 0.020455943 | 0.330371306 | 0.357877825  | 0.149635317  | 0.181174607  | growth toward the midline |
| ENSDART00000143291 | RPL41             | 0.002755913 | 0.451636798 | 0.464258672  | 0.193261311  | 0.034762109  | growth toward the midline |



|                    |                    |             |             |              |              |              |                           |
|--------------------|--------------------|-------------|-------------|--------------|--------------|--------------|---------------------------|
| ENSDART00000143587 | ern2               | 0.02452124  | 0.504450294 | 0.214096186  | 0.104332211  | 0.050090305  | growth toward the midline |
| ENSDART00000143618 | birc7              | 0.03238504  | 0.867487648 | 0.469428911  | 0.548081783  | 0.007263478  | growth toward the midline |
| ENSDART00000143766 | tbc1d4             | 0.027561798 | 0.551251852 | 0.35059591   | 0.424872318  | 0.224396247  | growth toward the midline |
| ENSDART00000143846 | si:ch211-198c19.3  | 0.000489924 | 0.524345776 | 0.185185856  | -0.297806816 | -0.062260629 | growth toward the midline |
| ENSDART00000143875 | BX323074.2         | 0.003519185 | 0.32505808  | -0.029313176 | -0.099305279 | -0.178101813 | growth toward the midline |
| ENSDART00000143928 | rwdd1              | 0.018316862 | 0.331616231 | 0.265135658  | 0.236169655  | 0.064492205  | growth toward the midline |
| ENSDART00000144048 | cccr1b             | 0.000723654 | 1.174703015 | 1.015529557  | 0.446419815  | -0.23634795  | growth toward the midline |
| ENSDART00000144139 | elavl4             | 0.003742624 | 1.756586356 | 1.578077782  | 0.938796608  | 0.66956976   | growth toward the midline |
| ENSDART00000144171 | tmem154            | 0.034302368 | 0.48356725  | 0.317274745  | 0.352966647  | 0.032904309  | growth toward the midline |
| ENSDART00000144886 | dicp1.1            | 0.024485347 | 1.748045166 | 0.589930553  | 0.172712572  | 0.178536852  | growth toward the midline |
| ENSDART00000144891 | gnpmb              | 0.000996442 | 2.526942309 | 2.443053131  | 2.053909603  | -0.779431544 | growth toward the midline |
| ENSDART00000145111 | parp4              | 0.00078525  | 1.113854381 | 0.990369473  | 0.690636927  | 0.186507426  | growth toward the midline |
| ENSDART00000145198 | steap4             | 0.002341904 | 0.551058744 | 0.178255002  | -0.419104103 | -0.970957834 | growth toward the midline |
| ENSDART00000145275 | si:dkey-147f3.8    | 0.000993187 | 1.443349889 | 1.631277345  | 1.233548809  | -0.107779207 | growth toward the midline |
| ENSDART00000145330 | apoc1              | 0.011155618 | 1.228570608 | 0.722853476  | 0.218571174  | 0.363892889  | growth toward the midline |
| ENSDART00000145331 | zgc:92066          | 0.060501903 | 3.539715592 | 2.15686966   | 1.135379743  | 1.013519624  | growth toward the midline |
| ENSDART00000145377 | rpl38              | 0.001017556 | 0.331388676 | 0.460944412  | 0.086514771  | -0.0487643   | growth toward the midline |
| ENSDART00000145562 | robo4              | 0.000595605 | 1.739515239 | 1.001047952  | 0.857159879  | -0.094789579 | growth toward the midline |
| ENSDART00000145681 | atp6v1h            | 0.000322013 | 0.62737841  | 0.200274483  | 0.109012982  | -0.483227692 | growth toward the midline |
| ENSDART00000145933 | si:rp71-68n21.9    | 0.016453138 | 0.834432396 | 0.464946482  | 0.375058394  | -0.112544064 | growth toward the midline |
| ENSDART00000145983 | cdkn1a             | 0.003897339 | 1.243824395 | 0.764194636  | 0.498342294  | 0.064303597  | growth toward the midline |
| ENSDART00000146101 | mcoln1a            | 0.002433479 | 0.490011182 | 0.372261102  | 0.240356077  | 0.080050098  | growth toward the midline |
| ENSDART00000146564 | si:ch211-198c19.3  | 0.000658214 | 1.407263699 | 0.462763747  | -0.033079511 | -0.600140762 | growth toward the midline |
| ENSDART00000147265 | rpl8               | 0.005893002 | 1.326651746 | 0.800643986  | 0.962132043  | 0.631592879  | growth toward the midline |
| ENSDART00000147275 | plat               | 0.013807548 | 0.870075522 | 0.84761039   | 0.802236758  | 0.134643658  | growth toward the midline |
| ENSDART00000147341 | tubb4b             | 0.0213019   | 0.566193096 | 0.992023395  | -0.136369873 | 0.130190834  | growth toward the midline |
| ENSDART00000147343 | dnase2             | 0.000313682 | 0.744692712 | 0.455061161  | 0.199303414  | -0.152365099 | growth toward the midline |
| ENSDART00000147516 | si:ch73-34314.8    | 0.002706926 | 0.629933021 | 0.124466643  | -0.147547456 | -2.286690979 | growth toward the midline |
| ENSDART00000147527 | si:dkey-9123.14    | 0.001146813 | 2.675666068 | 2.038798627  | 2.055161538  | 1.544748993  | growth toward the midline |
| ENSDART00000147617 | bcl2l1             | 0.002976628 | 0.692333613 | 0.690280735  | 0.392732217  | 0.224132994  | growth toward the midline |
| ENSDART00000148125 | fam21c             | 0.012864775 | 0.420817307 | 0.137516364  | 0.034339244  | -0.014273742 | growth toward the midline |
| ENSDART00000148327 | adamts17           | 0.000283184 | 2.218956465 | 1.395778664  | 0.846103004  | 0.026559812  | growth toward the midline |
| ENSDART00000148398 | MRAS (1 of many)   | 0.000781831 | 1.275583164 | 1.112018386  | 0.557077896  | 0.217843634  | growth toward the midline |
| ENSDART00000148582 | smpd1              | 0.002176351 | 0.404585024 | 0.130204031  | 0.022544887  | -0.113079466 | growth toward the midline |
| ENSDART00000148648 | rps25              | 0.003347171 | 0.412929704 | 0.39629643   | 0.197445263  | 0.016589956  | growth toward the midline |
| ENSDART00000148737 | btk                | 0.046077182 | 1.027482823 | 0.714086499  | 0.58431037   | 0.237640489  | growth toward the midline |
| ENSDART00000148766 | dpf2               | 0.01541945  | 1.058462293 | 0.640887505  | 0.623810049  | 0.633616815  | growth toward the midline |
| ENSDART00000148845 | BX649485.4         | 0.007338257 | 2.24411597  | 1.39694109   | 1.224587369  | -0.358910932 | growth toward the midline |
| ENSDART00000149019 | itpr1a             | 0.025939466 | 0.453945089 | 0.40663332   | 0.191730219  | 0.048560775  | growth toward the midline |
| ENSDART00000149043 | CR855300.1         | 0.019593044 | 0.458598352 | 0.519077258  | 0.374073731  | 0.109291075  | growth toward the midline |
| ENSDART00000149169 | ssr2               | 0.000562043 | 0.474946343 | 0.309006192  | 0.206925318  | -0.029893306 | growth toward the midline |
| ENSDART00000149431 | sema4aa            | 0.000470359 | 1.058121853 | 0.676658919  | 0.239884836  | -0.1730827   | growth toward the midline |
| ENSDART00000149468 | rps10              | 0.017275314 | 2.202930165 | 1.872426465  | 0.292067044  | 0.38759709   | growth toward the midline |
| ENSDART00000149478 | galns              | 0.01015025  | 1.09483472  | 0.726913129  | 0.227424057  | 0.052897193  | growth toward the midline |
| ENSDART00000149486 | def6b              | 0.012263789 | 4.188632994 | 4.544630212  | 4.117698226  | 0.985190768  | growth toward the midline |
| ENSDART00000149600 | tpp1               | 4.91848E-05 | 0.822885392 | 0.356076016  | 0.047488091  | -0.289304028 | growth toward the midline |
| ENSDART00000149711 | slc4a2b            | 0.000605314 | 0.638486491 | 0.276788243  | -0.283420926 | -0.322786037 | growth toward the midline |
| ENSDART00000149760 | triobpa            | 0.028230031 | 0.630702727 | 0.141628128  | 0.231366625  | 0.068551496  | growth toward the midline |
| ENSDART00000149882 | si:ch211-117c9.1   | 0.076090072 | 1.22256875  | 0.270051012  | 0.422501128  | 0.414018825  | growth toward the midline |
| ENSDART00000149951 | BX666064.1         | 0.012467303 | 1.493495344 | 0.978793976  | 0.565382246  | -0.392061768 | growth toward the midline |
| ENSDART00000150088 | BX649485.2         | 0.007435419 | 1.751466958 | 1.112873174  | 0.6867673    | -0.722119651 | growth toward the midline |
| ENSDART00000150184 | gpatch4            | 0.006624621 | 0.624444079 | 0.471783034  | 0.550844363  | 0.152733798  | growth toward the midline |
| ENSDART00000150201 | MRAS (1 of many)   | 0.001127896 | 1.00558208  | 0.977546999  | 0.676765678  | 0.026394977  | growth toward the midline |
| ENSDART00000150389 | tmem168a           | 0.066196151 | 0.525344796 | 0.286469995  | 0.221730459  | 0.080011152  | growth toward the midline |
| ENSDART00000150484 | BX465862.4         | 0.000615224 | 1.071580051 | 0.886976814  | 0.477743025  | 0.134467836  | growth toward the midline |
| ENSDART00000150919 | si:ch211-1911h.8.2 | 0.004498556 | 1.045780222 | 1.362401557  | 0.586788909  | 0.260330898  | growth toward the midline |
| ENSDART00000150934 | alg6               | 0.010983086 | 0.502789869 | 0.534691837  | 0.441461289  | 0.13055149   | growth toward the midline |
| ENSDART00000150940 | si:ch211-193k19.2  | 0.024493238 | 1.599024227 | 0.310661889  | 0.753508784  | 0.054490277  | growth toward the midline |
| ENSDART00000151390 | si:ch211-195b13.1  | 0.006097198 | 0.447846827 | 0.275025282  | 0.031728831  | 0.543393224  | growth toward the midline |
| ENSDART00000151393 | zak                | 0.000392364 | 0.559981256 | 0.606971645  | 0.291742344  | 0.078029866  | growth toward the midline |
| ENSDART00000151805 | vamp4              | 0.008628374 | 0.722926228 | 0.32988105   | 0.08556674   | 0.068052265  | growth toward the midline |
| ENSDART00000152122 | si:ch211-176g6.2   | 0.006040855 | 1.234754318 | 1.008584835  | 0.458934208  | -0.407921233 | growth toward the midline |
| ENSDART00000152299 | si:dkey-25o16.4    | 0.014178743 | 1.175283487 | 1.143366275  | 0.842863117  | 0.368204805  | growth toward the midline |
| ENSDART00000152378 | tgif1              | 0.003122803 | 0.194631245 | 0.419803811  | 0.14379228   | -0.205607529 | growth toward the midline |
| ENSDART00000152432 | lratb.2            | 0.001938223 | 0.819163408 | 1.604350772  | -0.35089707  | -0.825333131 | growth toward the midline |
| ENSDART00000152699 | si:ch211-286b5.9   | 0.004853289 | 1.056007406 | 0.325301277  | 0.188178466  | -0.341462888 | growth toward the midline |
| ENSDART00000152766 | CR354435.4         | 0.039457626 | 0.814174745 | 0.989990518  | 0.663039704  | 0.339445782  | growth toward the midline |
| ENSDART00000152788 | mk167              | 0.018439771 | 1.022403776 | 0.934711217  | 0.634468641  | 0.246495311  | growth toward the midline |
| ENSDART00000152892 | slc16a8            | 0.000894529 | 2.182950408 | 0.789162193  | -0.768133939 | -1.779969995 | growth toward the midline |
| ENSDART00000153248 | chad1b             | 0.026040756 | 1.217222776 | 0.847894599  | 0.639882396  | -0.038384888 | growth toward the midline |
| ENSDART00000153654 | piezo2a.2          | 0.004108486 | 0.718362747 | 0.545453706  | 0.495090248  | 0.182038228  | growth toward the midline |
| ENSDART00000153731 | si:dkey-79d12.5    | 2.59942E-05 | 1.619937595 | 1.685958359  | 0.880018827  | 0.052586274  | growth toward the midline |
| ENSDART00000153847 | si:dkey-7i4.24     | 0.017660302 | 4.19598891  | 4.052966176  | 3.712547417  | 1.148430087  | growth toward the midline |
| ENSDART00000153950 | si:dkey-106n21.1   | 0.013634701 | 1.634202521 | 0.388901976  | 0.409369194  | 0.514423363  | growth toward the midline |
| ENSDART00000153990 | CR848791.2         | 0.022463379 | 3.062868799 | 2.217074852  | 2.048805323  | 1.916392428  | growth toward the midline |

|                    |                    |             |             |             |              |              |                           |
|--------------------|--------------------|-------------|-------------|-------------|--------------|--------------|---------------------------|
| ENSDART00000154066 | isg20              | 0.006815804 | 0.340483696 | 0.28200181  | 0.116846361  | -0.121466791 | growth toward the midline |
| ENSDART00000154295 | RPS17 (1 of many)  | 0.002786216 | 0.397556507 | 0.446477566 | 0.193480989  | 0.136840294  | growth toward the midline |
| ENSDART00000154324 | CR848791.3         | 0.00017041  | 3.13610848  | 2.257927159 | 1.961382093  | 1.531269093  | growth toward the midline |
| ENSDART00000154460 | FP243382.1         | 0.01179775  | 2.715231463 | 2.420271029 | 2.173535574  | 1.735635064  | growth toward the midline |
| ENSDART00000154638 | kif26ab            | 0.032809386 | 2.382609513 | 1.668373417 | 1.704066313  | 1.906262158  | growth toward the midline |
| ENSDART00000154726 | MYADM (1 of many)  | 0.004207729 | 1.393641215 | 1.121324137 | 1.000193747  | 0.38217935   | growth toward the midline |
| ENSDART00000154801 | itgae.2            | 0.002196508 | 0.922252153 | 0.655667188 | 0.379341087  | -0.144710616 | growth toward the midline |
| ENSDART00000154809 | CU467861.1         | 0.013110232 | 0.653813027 | 0.40784225  | 0.192026805  | 0.151191997  | growth toward the midline |
| ENSDART00000155268 | pik3cb             | 0.012263789 | 0.672881324 | 0.553808807 | 0.246761254  | 0.040522215  | growth toward the midline |
| ENSDART00000155273 | FP102016.1         | 0.003003196 | 0.672121642 | 0.238521805 | 0.194526989  | 0.041260629  | growth toward the midline |
| ENSDART00000155427 | reep6              | 0.001233735 | 0.890805905 | 0.284631883 | 0.369468446  | 0.541597773  | growth toward the midline |
| ENSDART00000155519 | si:ch211-139d20.3  | 0.030271642 | 0.778333948 | 0.572606648 | 0.403486279  | 0.486914049  | growth toward the midline |
| ENSDART00000155553 | CR931780.1         | 0.003710792 | 1.845884645 | 1.39773807  | 0.761518659  | 0.588325484  | growth toward the midline |
| ENSDART00000155755 | CU469362.1         | 0.001684124 | 0.467928162 | 0.778645014 | 0.342312822  | -0.038725012 | growth toward the midline |
| ENSDART00000155844 | nrl4db             | 0.00277366  | 0.850133899 | 0.016728696 | -0.171313869 | 0.165802614  | growth toward the midline |
| ENSDART00000155864 | CU929070.1         | 0.002360359 | 1.274116455 | 1.096698631 | 0.870265354  | 0.298589514  | growth toward the midline |
| ENSDART00000156002 | tmern206           | 0.007346626 | 0.793441462 | 0.286165316 | 0.167291274  | -0.130249565 | growth toward the midline |
| ENSDART00000156428 | heph1a             | 0.008866484 | 0.427057323 | 0.215282086 | 0.277986668  | -0.033310258 | growth toward the midline |
| ENSDART00000156499 | prkcdB             | 0.006467002 | 0.617876805 | 0.366145269 | 0.057590279  | -0.230105501 | growth toward the midline |
| ENSDART00000156575 | dicp3.3            | 0.011810205 | 1.874714519 | 0.882148407 | 0.706359774  | -0.079481712 | growth toward the midline |
| ENSDART00000157190 | ostn               | 0.030844025 | 0.371505716 | 0.628806712 | 0.229636498  | 0.167623814  | growth toward the midline |
| ENSDART00000157487 | ttec               | 0.001790465 | 0.534318298 | 0.423012313 | 0.205933849  | -0.313187686 | growth toward the midline |
| ENSDART00000157636 | Metazoa_SRP        | 4.91295E-05 | 2.626880551 | 2.386640401 | 1.529298522  | 0.72995056   | growth toward the midline |
| ENSDART00000157899 | dad1               | 0.009401721 | 0.443099375 | 0.390242441 | 0.192203328  | -0.014224626 | growth toward the midline |
| ENSDART00000158212 | zgc:92161          | 0.004952764 | 0.66498591  | 0.968065208 | 0.600651955  | -0.278084019 | growth toward the midline |
| ENSDART00000158581 | spna2              | 0.00601663  | 0.480311119 | 0.377153274 | 0.267336877  | -0.085977531 | growth toward the midline |
| ENSDART00000158733 | si:key-33i11.1     | 0.004853289 | 1.813729642 | 1.289849367 | 0.876112899  | 0.279282769  | growth toward the midline |
| ENSDART00000158808 | cnm3a              | 6.00847E-05 | 0.586268263 | 0.320248819 | -0.106889335 | -0.483977637 | growth toward the midline |
| ENSDART00000159246 | ctsa               | 0.004928313 | 0.554249571 | 0.498653237 | 0.219459997  | 0.055975716  | growth toward the midline |
| ENSDART00000159330 | pcyox1             | 0.007509621 | 0.406833689 | 0.21789945  | 0.044242143  | -0.158070725 | growth toward the midline |
| ENSDART00000159433 | BX571691.1         | 0.030614624 | 2.919338685 | 1.742268402 | 2.797274384  | 2.742997875  | growth toward the midline |
| ENSDART00000159434 | tmem254            | 0.019015879 | 0.529951039 | 0.26685766  | 0.074245289  | -0.042910999 | growth toward the midline |
| ENSDART00000159534 | leng9              | 0.002069136 | 0.34368633  | 0.401471128 | 0.132926162  | 0.109702136  | growth toward the midline |
| ENSDART00000159629 | lcm2               | 0.044268959 | 0.995796878 | 0.693727511 | 0.639304212  | 0.157223466  | growth toward the midline |
| ENSDART00000159716 | si:ch73-236c18.6   | 0.022944365 | 0.962463693 | 0.259951761 | 0.066014607  | 0.162933451  | growth toward the midline |
| ENSDART00000160000 | spdl1              | 0.016622249 | 1.145158953 | 1.158182543 | 1.166185329  | 0.390123322  | growth toward the midline |
| ENSDART00000160116 | racgap1            | 0.01613952  | 0.647984241 | 0.386764067 | 0.354192772  | 0.100327502  | growth toward the midline |
| ENSDART00000160201 | tnfrsf11b          | 4.91848E-05 | 2.52634883  | 1.22900254  | 0.873090756  | -0.039240801 | growth toward the midline |
| ENSDART00000160245 | si:ch73-236c18.7   | 0.03675533  | 2.124440879 | 1.318007353 | 1.287829039  | 0.437471879  | growth toward the midline |
| ENSDART00000160297 | vcana              | 0.04873911  | 1.601498468 | 0.665214133 | 0.454293537  | 0.486706931  | growth toward the midline |
| ENSDART00000160331 | atp6v0e1           | 0.000593122 | 0.536560194 | 0.109862681 | -0.220128717 | -0.336777163 | growth toward the midline |
| ENSDART00000160503 | slc15a4            | 0.005895019 | 0.534058917 | 0.262741482 | 0.05558204   | -0.165911292 | growth toward the midline |
| ENSDART00000160536 | gnsb               | 6.00847E-05 | 1.380175579 | 0.91424754  | 0.488823056  | 0.00723105   | growth toward the midline |
| ENSDART00000160582 | creb5a             | 4.11188E-05 | 2.028867303 | 1.691967909 | 1.27021295   | 0.836790625  | growth toward the midline |
| ENSDART00000160902 | naga               | 0.00155515  | 0.641123507 | 0.233762511 | 0.291444137  | -0.017668678 | growth toward the midline |
| ENSDART00000161040 | U1                 | 0.063982053 | 0.811168663 | 0.450901632 | 0.418592021  | 0.580227266  | growth toward the midline |
| ENSDART00000161063 | heatr1             | 0.020490278 | 0.383217268 | 0.256645773 | 0.173900631  | 0.113179939  | growth toward the midline |
| ENSDART00000161216 | dync1i2a           | 0.016102005 | 1.005522301 | 0.520541958 | 0.468549497  | -0.022454144 | growth toward the midline |
| ENSDART00000161240 | zgc:92161          | 0.014596701 | 0.64076871  | 0.663364233 | 0.486030672  | 0.10810748   | growth toward the midline |
| ENSDART00000161322 | slc29a1a           | 0.003016249 | 0.535023852 | 0.636573744 | 0.365586045  | -0.115892928 | growth toward the midline |
| ENSDART00000161421 | zgc:194627         | 0.005106608 | 1.998498644 | 1.298544665 | 0.773438314  | 0.249109157  | growth toward the midline |
| ENSDART00000161906 | vwa11              | 0.001097466 | 1.529478256 | 0.755786632 | 0.896680083  | 0.546980022  | growth toward the midline |
| ENSDART00000161967 | ctsc               | 0.000657061 | 1.279775059 | 0.583635254 | 0.329059668  | -0.157215155 | growth toward the midline |
| ENSDART00000162097 | CABZ01044157.1     | 0.011403904 | 1.031550352 | 0.670727071 | 0.212982548  | -0.249292553 | growth toward the midline |
| ENSDART00000162282 | dicp3.1            | 0.000996442 | 0.839763954 | 0.379787637 | 0.004488715  | -0.034973807 | growth toward the midline |
| ENSDART00000162296 | cfp                | 0.000230274 | 0.329536618 | 0.225136408 | -0.193120136 | -0.891420593 | growth toward the midline |
| ENSDART00000162472 | VVA5A (1 of many)  | 0.004190237 | 0.543940251 | 0.262980075 | 0.410699646  | -0.136546959 | growth toward the midline |
| ENSDART00000162482 | zgc:152863         | 0.019421916 | 0.539805357 | 0.660295595 | 0.432850415  | 0.095615261  | growth toward the midline |
| ENSDART00000162668 | cremb              | 4.56695E-06 | 4.310209888 | 4.052771    | 3.333577791  | 2.240090056  | growth toward the midline |
| ENSDART00000162799 | crb3a              | 0.012813136 | 0.362169262 | 0.040586113 | -0.086039525 | -0.014272311 | growth toward the midline |
| ENSDART00000162958 | si:ch211-260e23.9  | 0.01863352  | 0.345171245 | 0.431307401 | 0.079575678  | 0.236719343  | growth toward the midline |
| ENSDART00000163018 | bet1l              | 0.049630983 | 0.723011674 | 0.444641169 | 0.411413339  | 0.530095318  | growth toward the midline |
| ENSDART00000163391 | si:ch211-149k12.3  | 0.022976426 | 0.507081525 | 0.32718269  | 0.316220639  | 0.200966933  | growth toward the midline |
| ENSDART00000163398 | pla2g15            | 0.007621679 | 0.61752366  | 0.443695085 | 0.159097428  | 0.08811481   | growth toward the midline |
| ENSDART00000163407 | slc20a1a           | 0.005041829 | 0.97051209  | 0.576996952 | 0.406775549  | -0.419444699 | growth toward the midline |
| ENSDART00000163668 | si:ch1073-392o20.2 | 0.002227565 | 0.543875349 | 0.345011244 | 0.082952674  | -0.090250505 | growth toward the midline |
| ENSDART00000163724 | SLA (1 of many)    | 0.041839159 | 1.207342807 | 0.416124608 | 0.383103847  | 0.193096581  | growth toward the midline |
| ENSDART00000163794 | wt1b               | 0.02934736  | 0.454982734 | 0.330694147 | 0.317167947  | 0.300420298  | growth toward the midline |
| ENSDART00000164113 | cpeb1a             | 0.0004696   | 1.336706705 | 1.190402311 | 1.006023313  | 0.300918459  | growth toward the midline |
| ENSDART00000164161 | osbp1a             | 0.000360396 | 0.351337908 | 0.311134875 | -0.016374257 | -0.257205353 | growth toward the midline |
| ENSDART00000164198 | si:key-102m7.3     | 0.011741843 | 0.949739085 | 1.411170301 | 0.641678924  | 0.378323778  | growth toward the midline |
| ENSDART00000164305 | dicp1.1            | 0.001163813 | 0.970381914 | 0.35730766  | 0.127672979  | 0.007978514  | growth toward the midline |
| ENSDART00000164440 | si:ch211-195b11.3  | 0.017379805 | 0.887240489 | 0.373309939 | 0.100891486  | -0.191092546 | growth toward the midline |
| ENSDART00000164484 | dtnba              | 0.000293873 | 0.785988532 | 0.671033087 | 0.445356623  | 0.140878127  | growth toward the midline |
| ENSDART00000165186 | si:key-33i11.9     | 0.01609527  | 1.335261857 | 1.027980768 | 0.465372707  | 0.114592431  | growth toward the midline |

|                    |                   |             |             |             |              |              |                           |
|--------------------|-------------------|-------------|-------------|-------------|--------------|--------------|---------------------------|
| ENSDART00000165491 | BX294383.1        | 0.040285619 | 0.352047768 | 0.065820831 | 0.027639622  | 0.019046581  | growth toward the midline |
| ENSDART00000165499 | rps17             | 0.001024575 | 0.504096498 | 0.637791027 | 0.385574489  | 0.024446186  | growth toward the midline |
| ENSDART00000165735 | mdm4              | 0.009204947 | 0.677008086 | 0.457427602 | 0.365768719  | 0.56900659   | growth toward the midline |
| ENSDART00000165932 | sik1              | 0.023071688 | 1.156253383 | 0.676084919 | 0.687880039  | 1.28219737   | growth toward the midline |
| ENSDART00000165938 | CU466240.1        | 0.062849789 | 0.428025361 | 0.165679287 | 0.139754855  | 0.298251046  | growth toward the midline |
| ENSDART00000166152 | DAB2 (1 of many)  | 0.00878097  | 0.967097608 | 0.419929333 | 0.22593558   | -0.403858057 | growth toward the midline |
| ENSDART00000166209 | wu:fb44b02        | 0.001191783 | 0.715207055 | 0.457109376 | 0.301906263  | -0.147536436 | growth toward the midline |
| ENSDART00000166388 | il6st             | 0.008110834 | 0.326944598 | 0.248050944 | 0.233084281  | -0.066517896 | growth toward the midline |
| ENSDART00000166395 | fcer1gl           | 0.000698893 | 0.672549379 | 0.370716598 | -0.127334281 | -0.409142814 | growth toward the midline |
| ENSDART00000166496 | cat               | 0.008672693 | 0.249947463 | 0.551180864 | 0.073389354  | -0.18327225  | growth toward the midline |
| ENSDART00000166561 | ttc38             | 0.002390041 | 0.445202505 | 0.288306634 | -0.06639877  | -0.156646921 | growth toward the midline |
| ENSDART00000166591 | utp20             | 0.017280106 | 0.378085419 | 0.246513796 | 0.276819854  | 0.15697444   | growth toward the midline |
| ENSDART00000166632 | si:zfos-741a10.3  | 0.016381744 | 1.2129476   | 0.572994738 | 0.242126634  | 0.029899239  | growth toward the midline |
| ENSDART00000166690 | gadd45ga          | 0.000475692 | 1.824520476 | 2.195526461 | 0.938941318  | 1.401631316  | growth toward the midline |
| ENSDART00000166725 | si:dkey-27j5.9    | 0.024411518 | 1.657914875 | 0.40212862  | 0.542892045  | 0.141569929  | growth toward the midline |
| ENSDART00000166755 | tril              | 0.013035616 | 1.481556618 | 0.917097925 | 0.535942919  | 0.363878102  | growth toward the midline |
| ENSDART00000167279 | klhl6             | 0.010535127 | 0.921934193 | 0.563560813 | 0.364277897  | 0.100202901  | growth toward the midline |
| ENSDART00000167468 | prpsap1           | 0.0101684   | 0.532862733 | 0.121505744 | 0.13944499   | -0.034080691 | growth toward the midline |
| ENSDART00000167748 | fbn2b             | 0.005787591 | 1.02333483  | 0.65734038  | 0.922883374  | 0.19244827   | growth toward the midline |
| ENSDART00000167786 | NA                | 0.032175544 | 0.801350724 | 0.147008366 | 0.081187044  | 0.322292312  | growth toward the midline |
| ENSDART00000167937 | p4hb              | 0.000670207 | 0.35105827  | 0.247669434 | -0.015299318 | -0.184059227 | growth toward the midline |
| ENSDART00000167971 | rps18             | 0.008672693 | 0.367747716 | 0.388045404 | 0.209564172  | -0.058761163 | growth toward the midline |
| ENSDART00000167986 | hadhb             | 0.00721984  | 0.310832473 | 0.238522601 | 0.004510639  | -0.025410475 | growth toward the midline |
| ENSDART00000168002 | laptn5            | 0.00340435  | 1.090713638 | 0.609708871 | 0.327355694  | -0.215403696 | growth toward the midline |
| ENSDART00000168472 | creb5a            | 0.024581131 | 2.212193939 | 1.443174599 | 0.809493268  | 0.247644913  | growth toward the midline |
| ENSDART00000168608 | rnaset2           | 0.002456687 | 1.085971834 | 0.685727013 | 0.397141355  | 0.382009137  | growth toward the midline |
| ENSDART00000168727 | zgc:64065         | 0.021156666 | 0.439077495 | 0.173893761 | 0.133684815  | 0.136149811  | growth toward the midline |
| ENSDART00000168831 | si:ch73-158p21.3  | 0.004606351 | 1.161771941 | 0.892729958 | 0.502592433  | 0.147950065  | growth toward the midline |
| ENSDART00000168840 | rpl35a            | 0.004477335 | 0.357031004 | 0.320334573 | 0.163051637  | -0.036511823 | growth toward the midline |
| ENSDART00000169006 | ak2               | 0.034654408 | 0.70404039  | 0.489848323 | 0.563968118  | 0.137147044  | growth toward the midline |
| ENSDART00000169202 | si:ch211-153b23.5 | 0.004687334 | 4.343063064 | 5.139014825 | 3.462179286  | 1.548865865  | growth toward the midline |
| ENSDART00000169209 | ptrh1             | 0.000931909 | 0.68284848  | 0.772674127 | 0.446966304  | 0.22472723   | growth toward the midline |
| ENSDART00000169600 | abhd4             | 0.004142854 | 0.160082589 | 0.423680439 | -0.10396044  | -0.08495852  | growth toward the midline |
| ENSDART00000169633 | col4a3bpb         | 0.002735847 | 0.489929413 | 0.127889926 | -0.192097119 | -0.259910666 | growth toward the midline |
| ENSDART00000169789 | grap2b            | 0.054938882 | 0.941263606 | 0.635408975 | 0.416956975  | 0.146969065  | growth toward the midline |
| ENSDART00000169834 | CAB201052431.1    | 0.000470359 | 0.752252615 | 0.635370532 | 0.523133762  | 0.005708707  | growth toward the midline |
| ENSDART00000169976 | CAB201034529.1    | 0.002936628 | 0.902549952 | 0.806876908 | 0.306228824  | 0.021333022  | growth toward the midline |
| ENSDART00000169993 | stx12             | 0.009181211 | 0.289245416 | 0.334302649 | 0.162033659  | 0.014864416  | growth toward the midline |
| ENSDART00000170060 | mdh1b             | 0.024987601 | 3.761355509 | 3.246314783 | 3.336555843  | 1.787365183  | growth toward the midline |
| ENSDART00000170304 | CAB201039096.1    | 0.03168371  | 1.863106121 | 1.329668381 | 1.247074235  | 0.639142974  | growth toward the midline |
| ENSDART00000170326 | gadd45ba          | 0.013456921 | 1.741159479 | 1.754335562 | 1.06756424   | 0.870946071  | growth toward the midline |
| ENSDART00000170601 | si:ch1073-228h2.2 | 0.032809386 | 1.512427811 | 1.187632525 | 1.253650535  | 1.028624188  | growth toward the midline |
| ENSDART00000170755 | slc30a8           | 0.000398071 | 0.607491231 | 0.345740737 | -0.026161917 | -0.397029232 | growth toward the midline |
| ENSDART00000170758 | tcirg1b           | 0.007786985 | 0.779415513 | 0.215400071 | 0.036986865  | -0.339490039 | growth toward the midline |
| ENSDART00000170810 | si:dkey-10p5.7    | 0.01179775  | 1.115159817 | 1.313044185 | 0.773496009  | 0.334257673  | growth toward the midline |
| ENSDART00000171090 | sowahd            | 0.01612441  | 0.56962557  | 0.415649109 | 0.184768671  | -0.065367372 | growth toward the midline |
| ENSDART00000171179 | si:ch211-241b2.5  | 0.005678515 | 1.438237825 | 1.596241839 | 1.013176313  | 0.055616895  | growth toward the midline |
| ENSDART00000171270 | ckap2l            | 0.013513343 | 0.621565842 | 0.655006082 | 0.304610509  | 0.072068559  | growth toward the midline |
| ENSDART00000171345 | NA                | 0.060649685 | 2.015201895 | 1.694676698 | 1.017867776  | 0.711389392  | growth toward the midline |
| ENSDART00000171430 | BX908401.1        | 0.055863259 | 0.558597997 | 0.282396796 | 0.308082083  | 0.228227036  | growth toward the midline |
| ENSDART00000171789 | NA                | 0.00889295  | 1.544321358 | 1.350890859 | 1.388203792  | 0.786947546  | growth toward the midline |
| ENSDART00000172069 | snrpg             | 0.014753252 | 0.452166641 | 0.481061823 | 0.338564477  | 0.058821342  | growth toward the midline |
| ENSDART00000172135 | sh3pxd2b          | 0.005584581 | 0.68385955  | 0.832942161 | 0.517904326  | 0.090715158  | growth toward the midline |
| ENSDART00000172201 | trpv1             | 0.0044585   | 0.412354182 | 0.082280105 | 0.061779394  | -0.254715035 | growth toward the midline |
| ENSDART00000172207 | si:ch211-9d9.1    | 0.000466856 | 1.222547885 | 0.297262625 | 0.271454205  | -2.80261928  | growth toward the midline |
| ENSDART00000172408 | arhgap11a         | 0.030198325 | 0.695056063 | 0.093403628 | 0.066933123  | 0.263951638  | growth toward the midline |
| ENSDART00000172555 | rps15a            | 0.004379828 | 0.386196694 | 0.41469411  | 0.231657808  | -0.026260131 | growth toward the midline |
| ENSDART00000172892 | CR769769.2        | 0.02363886  | 0.615702823 | 0.344273677 | 0.373739938  | 0.336791427  | growth toward the midline |
| ENSDART00000172893 | si:ch211-207g17.2 | 0.01138794  | 1.081136407 | 0.564546524 | -0.069203481 | -0.244746802 | growth toward the midline |
| ENSDART00000172953 | rpl29             | 0.008586878 | 0.354363113 | 0.457581567 | 0.206775836  | 0.026974968  | growth toward the midline |
| ENSDART00000173145 | rpl29             | 0.006013085 | 0.32197024  | 0.280412475 | 0.068293144  | -0.107729465 | growth toward the midline |
| TRANSGENE          | NA                | 7.26665E-10 | 3.62113341  | 4.519443337 | 2.76591932   | 1.041497447  | growth toward the midline |
| ENSDART00000002186 | uck2a             | 0.001969989 | 0.69693934  | 0.733529046 | 0.658757388  | 0.439621207  | midline crossing          |
| ENSDART00000002250 | hs6st2            | 0.009748008 | 0.156001692 | 0.361544481 | 0.514379395  | 0.208727247  | midline crossing          |
| ENSDART00000002641 | kif26aa           | 0.003651057 | 0.255726279 | 0.47696992  | 0.58781469   | 0.342072456  | midline crossing          |
| ENSDART00000002932 | marcksb           | 0.000213603 | 1.016829958 | 1.677411962 | 1.758104803  | 1.229873931  | midline crossing          |
| ENSDART00000003066 | cyth1a            | 0.000219336 | 0.591135613 | 0.827117646 | 0.654961234  | 0.137500638  | midline crossing          |
| ENSDART00000003076 | usp28             | 0.011417724 | 1.676441425 | 4.659547988 | 4.384020448  | 3.839785573  | midline crossing          |
| ENSDART00000003296 | sars              | 0.039604681 | 0.182171112 | 0.390636242 | 0.505424837  | 0.283972917  | midline crossing          |
| ENSDART00000003752 | cct3              | 0.006479841 | 0.348496547 | 0.407130663 | 0.410390239  | 0.168454536  | midline crossing          |
| ENSDART00000003790 | pwp1              | 0.01633867  | 0.32756693  | 0.411455433 | 0.339342319  | 0.085530698  | midline crossing          |
| ENSDART00000003891 | jupa              | 0.020463519 | 0.359241944 | 1.297843964 | 1.552619484  | 0.724987275  | midline crossing          |
| ENSDART00000004423 | iars              | 0.002440466 | 0.363891152 | 0.394414274 | 0.599518689  | 0.155539422  | midline crossing          |
| ENSDART00000004474 | mapre1b           | 0.001177059 | 0.531914947 | 0.849936108 | 0.970422656  | 0.515027849  | midline crossing          |
| ENSDART00000005119 | eif3i             | 0.018217202 | 0.208433038 | 0.349717288 | 0.244101269  | 0.053458955  | midline crossing          |

|                    |            |             |             |             |              |              |                  |
|--------------------|------------|-------------|-------------|-------------|--------------|--------------|------------------|
| ENSDART00000005593 | casp3a     | 0.000114847 | 0.498469533 | 1.198942327 | 1.332280554  | 0.912417093  | midline crossing |
| ENSDART00000005616 | rnpep      | 0.025134747 | 0.523525834 | 0.750055071 | 0.77634383   | 0.462027268  | midline crossing |
| ENSDART00000005847 | nav3       | 6.75287E-05 | 0.773382381 | 1.009593057 | 0.901548272  | 0.783565613  | midline crossing |
| ENSDART00000005944 | rpl5a      | 0.001179374 | 0.381988038 | 0.550810639 | 0.338076702  | 0.013320357  | midline crossing |
| ENSDART00000006058 | eif2s1a    | 0.03277385  | 0.414016542 | 0.357076684 | 0.28859634   | 0.112415797  | midline crossing |
| ENSDART00000006908 | itgb3b     | 2.33589E-05 | 1.52546911  | 1.915133846 | 1.613887964  | 0.668451164  | midline crossing |
| ENSDART00000007231 | psmb1      | 0.012813136 | 0.336843399 | 0.41477024  | 0.441532829  | 0.103495117  | midline crossing |
| ENSDART00000007789 | idh1       | 0.001120005 | 0.209391072 | 0.491026617 | 0.59658334   | 0.190896441  | midline crossing |
| ENSDART00000007857 | mettl2a    | 0.019840997 | 0.337109376 | 0.448868897 | 0.378403392  | 0.127678255  | midline crossing |
| ENSDART00000009477 | cct8       | 0.008761738 | 0.2739469   | 0.4225965   | 0.299361505  | 0.113502813  | midline crossing |
| ENSDART00000009549 | rhag       | 0.050085111 | 0.97898574  | 1.27206332  | 1.678759018  | 0.617102069  | midline crossing |
| ENSDART00000009609 | eif5a      | 0.00304733  | 0.382861639 | 0.513300938 | 0.466153608  | 0.171038659  | midline crossing |
| ENSDART00000010256 | eif3m      | 0.008283592 | 0.301540845 | 0.415293475 | 0.295465222  | 0.073592881  | midline crossing |
| ENSDART00000010271 | aida       | 0.002673241 | 0.207262438 | 0.531449642 | 0.462716258  | 0.148174666  | midline crossing |
| ENSDART00000010647 | rcc2       | 0.040200236 | 0.312248055 | 0.54892666  | 0.398800486  | 0.1537421    | midline crossing |
| ENSDART00000010683 | impa1      | 0.024809879 | 0.486043053 | 0.448191747 | 0.382482237  | 0.291162031  | midline crossing |
| ENSDART00000010997 | tpm3       | 0.039972057 | 0.446911874 | 0.508209148 | 0.705423057  | 0.171806011  | midline crossing |
| ENSDART00000011258 | npl        | 0.042570446 | 0.373272645 | 0.54061543  | 0.468726439  | 0.170404917  | midline crossing |
| ENSDART00000011447 | sae1       | 0.006887747 | 0.282597281 | 0.674186287 | 0.734155697  | 0.424524708  | midline crossing |
| ENSDART00000011691 | baxa       | 0.00197074  | 0.500319714 | 0.752407609 | 0.690306826  | 0.30333895   | midline crossing |
| ENSDART00000011699 | nono       | 0.019981901 | 0.31722902  | 0.329157035 | 0.240624596  | 0.057167441  | midline crossing |
| ENSDART00000011878 | eif4a1b    | 0.023987365 | 0.134279506 | 0.344064551 | 0.309281202  | 0.284267369  | midline crossing |
| ENSDART00000012164 | tmod2      | 0.019466285 | 0.222306993 | 0.411676025 | 0.560901639  | 0.297325519  | midline crossing |
| ENSDART00000012686 | dnase1l4.1 | 0.01793082  | 0.654985436 | 1.279054377 | 1.240763186  | 0.531962605  | midline crossing |
| ENSDART00000012791 | sp8a       | 0.049626195 | 1.57251014  | 2.331511764 | 2.00847442   | 1.039704847  | midline crossing |
| ENSDART00000014049 | wdr36      | 0.014675171 | 0.429321608 | 0.423447996 | 0.351992847  | 0.181701695  | midline crossing |
| ENSDART00000014058 | zgc:100829 | 0.002661298 | 0.836226257 | 1.366715788 | 1.414785917  | 0.344237354  | midline crossing |
| ENSDART00000014983 | zgc:153867 | 0.00612514  | 0.36977967  | 0.600215172 | 0.463408621  | 0.079627153  | midline crossing |
| ENSDART00000015103 | hps3       | 0.030383057 | 0.398719216 | 0.34180849  | 0.31802597   | 0.20234989   | midline crossing |
| ENSDART00000015193 | chmp4bb    | 0.001754036 | 0.349511966 | 0.500219693 | 0.425249872  | 0.076172611  | midline crossing |
| ENSDART00000015374 | cyb5r1     | 0.020123282 | 0.481284363 | 0.621601719 | 0.549959374  | 0.29311095   | midline crossing |
| ENSDART00000015628 | klhl24b    | 0.021895107 | 0.257620397 | 0.582600724 | 0.358856753  | 0.009507758  | midline crossing |
| ENSDART00000016112 | capns1b    | 0.000336326 | 0.258538261 | 0.719472725 | 0.61845775   | 0.248329876  | midline crossing |
| ENSDART00000016135 | nfe2l3     | 0.02142158  | 0.030439041 | 0.342226134 | 0.430712572  | 0.086440986  | midline crossing |
| ENSDART00000016464 | dcps       | 0.017642395 | 0.045608002 | 0.377363095 | -0.076988765 | 0.017970252  | midline crossing |
| ENSDART00000016591 | fgf6a      | 0.000507398 | 0.502410209 | 1.375431955 | 1.297903392  | 1.026892284  | midline crossing |
| ENSDART00000016628 | fam129bb   | 0.003338328 | 0.861865647 | 1.020541987 | 0.89470832   | 0.182764632  | midline crossing |
| ENSDART00000016946 | glud1a     | 0.066889451 | 0.489439701 | 0.519599049 | 0.659106358  | 0.391317016  | midline crossing |
| ENSDART00000017230 | snrpc      | 0.012958044 | 0.173923367 | 0.335809723 | 0.464722714  | 0.188235196  | midline crossing |
| ENSDART00000017422 | tbc1d17    | 0.000844564 | 0.129347814 | 0.49736446  | 0.343125168  | -0.01149421  | midline crossing |
| ENSDART00000018408 | anxa13l    | 5.81566E-05 | 0.767695981 | 1.876785961 | 1.969202275  | 1.362090979  | midline crossing |
| ENSDART00000018685 | syt9a      | 0.018500869 | 0.383050894 | 0.997731574 | 0.678563906  | 0.37205351   | midline crossing |
| ENSDART00000018743 | phf20a     | 0.027269932 | 0.312029532 | 0.419745206 | 0.325238046  | 0.318832686  | midline crossing |
| ENSDART00000019521 | dip2ba     | 0.005277161 | 0.352814519 | 0.501689217 | 0.539560646  | 0.272762208  | midline crossing |
| ENSDART00000019698 | anxa5b     | 0.006899426 | 1.162500386 | 1.67744918  | 1.46667303   | 0.432101083  | midline crossing |
| ENSDART00000019750 | wdr5       | 0.067593058 | 0.151689533 | 0.300718903 | 0.396766724  | 0.199844693  | midline crossing |
| ENSDART00000019818 | ric8b      | 0.011108721 | 0.219425238 | 0.304273846 | 0.411142498  | 0.146708414  | midline crossing |
| ENSDART00000020048 | gsna       | 0.018144005 | 0.451913636 | 0.79824491  | 0.782008443  | 0.357949724  | midline crossing |
| ENSDART00000020084 | hsp90ab1   | 0.015156186 | 0.266636397 | 0.434039186 | 0.537534154  | 0.384889667  | midline crossing |
| ENSDART00000020256 | lgsn       | 0.036969899 | 1.361702081 | 2.686172063 | 1.394569806  | 0.349584846  | midline crossing |
| ENSDART00000020638 | rca1a      | 0.04859805  | 0.548382891 | 0.378475469 | 0.383543152  | 0.544764217  | midline crossing |
| ENSDART00000021666 | rtca       | 0.004731414 | 0.450183742 | 0.82121323  | 0.721903733  | 0.20677388   | midline crossing |
| ENSDART00000022060 | atf3       | 2.2034E-05  | 2.958540036 | 3.348918067 | 2.852908333  | 1.811501419  | midline crossing |
| ENSDART00000023123 | nup88      | 0.017159406 | 0.221684741 | 0.406336851 | 0.406160624  | 0.250704697  | midline crossing |
| ENSDART00000023156 | eef1a1l2   | 0.002558097 | 0.512554224 | 0.741741761 | 0.709552788  | 0.28897731   | midline crossing |
| ENSDART00000023709 | ptp4a2b    | 0.023468821 | 0.271575512 | 0.562448581 | 0.634906429  | 0.086969331  | midline crossing |
| ENSDART00000023779 | vcp        | 0.053123832 | 0.230561184 | 0.246570266 | 0.325389872  | 0.137878127  | midline crossing |
| ENSDART00000023833 | eif2s3     | 0.013547844 | 0.172990624 | 0.349255612 | 0.311895175  | 0.045890851  | midline crossing |
| ENSDART00000024309 | rb1        | 0.001317626 | 0.736743325 | 0.968558289 | 0.720111001  | 0.238176467  | midline crossing |
| ENSDART00000024320 | ybx1       | 0.075082889 | 0.257630768 | 0.252218726 | 0.414084055  | 0.18414263   | midline crossing |
| ENSDART00000024662 | plppr3a    | 0.000164013 | 1.050789931 | 1.738581828 | 1.609411361  | 1.082826483  | midline crossing |
| ENSDART00000024872 | creb3l3l   | 0.003959852 | 0.316205692 | 0.628018553 | 0.525420097  | 0.254183225  | midline crossing |
| ENSDART00000025385 | cers2a     | 0.00721984  | 0.59368354  | 0.657003513 | 0.583941604  | 0.192392368  | midline crossing |
| ENSDART00000025496 | rras       | 0.010693822 | 0.483455604 | 0.817924325 | 0.502791397  | -0.193021858 | midline crossing |
| ENSDART00000025535 | sept5a     | 0.004815134 | 0.521581645 | 1.371610673 | 0.945407012  | 0.566204111  | midline crossing |
| ENSDART00000025550 | top1mt     | 0.003833624 | 0.816108961 | 1.133963099 | 0.883225094  | 0.407533529  | midline crossing |
| ENSDART00000025620 | ppiaa      | 0.002705637 | 0.369681961 | 0.563046067 | 0.555154111  | 0.174901331  | midline crossing |
| ENSDART00000025782 | nup93      | 0.062586781 | 0.17632244  | 0.241668195 | 0.293793434  | 0.152368608  | midline crossing |
| ENSDART00000026180 | fabp7a     | 0.006795032 | 0.745585804 | 2.003621538 | 1.857780253  | 1.020257385  | midline crossing |
| ENSDART00000026339 | gtpbbp4    | 0.048096163 | 0.113641949 | 0.327640711 | 0.222548232  | 0.071359586  | midline crossing |
| ENSDART00000026409 | cct4       | 0.00602897  | 0.459151422 | 0.538338734 | 0.621039126  | 0.313903974  | midline crossing |
| ENSDART00000026814 | ptp4a1     | 0.004605292 | 0.419787699 | 0.591512581 | 0.636748721  | 0.300535035  | midline crossing |
| ENSDART00000027616 | eif4g2a    | 0.000406473 | 0.333990776 | 0.435258045 | 0.644700731  | 0.350291836  | midline crossing |
| ENSDART00000028090 | eif2ak1    | 0.011517304 | 0.218229206 | 0.400243646 | 0.398265404  | 0.179590234  | midline crossing |
| ENSDART00000029843 | vezf1a     | 0.001561003 | 0.660507751 | 0.776194217 | 0.884683465  | 0.428803142  | midline crossing |

|                    |                   |             |              |             |             |              |                  |
|--------------------|-------------------|-------------|--------------|-------------|-------------|--------------|------------------|
| ENSDART0000030205  | bnip3lb           | 0.010960196 | 0.087436849  | 0.295010863 | 0.335325724 | 0.120618456  | midline crossing |
| ENSDART0000030691  | clic4             | 0.028282855 | 0.290171682  | 0.490608957 | 0.279069846 | 0.046035564  | midline crossing |
| ENSDART0000032322  | abcg2c            | 0.004813371 | 0.455571157  | 0.699504596 | 0.641510999 | 0.335341634  | midline crossing |
| ENSDART0000032324  | hddc3             | 0.020485853 | 0.491004501  | 0.803369277 | 0.623276564 | 0.474326204  | midline crossing |
| ENSDART0000032331  | gmppab            | 0.008531138 | 0.298836739  | 0.452114759 | 0.362408461 | -0.028707454 | midline crossing |
| ENSDART0000032540  | usp14             | 0.04750637  | 0.236991779  | 0.380670741 | 0.291281165 | 0.061189525  | midline crossing |
| ENSDART0000032603  | tspo              | 0.008848885 | 0.47255795   | 0.736846252 | 0.52533392  | 0.11686825   | midline crossing |
| ENSDART0000032857  | mapk11            | 0.047290605 | 0.353170314  | 0.603154564 | 0.6388701   | 0.458511735  | midline crossing |
| ENSDART0000033316  | vangl2            | 0.00277587  | 0.207491244  | 0.447705982 | 0.579933447 | 0.26125294   | midline crossing |
| ENSDART0000033479  | si:ch211-129c21.1 | 0.00140081  | 1.539581327  | 2.000726167 | 1.978342783 | 1.084446492  | midline crossing |
| ENSDART0000033494  | kif6a             | 0.000170861 | 1.084550888  | 1.797692613 | 1.625562666 | 0.460444617  | midline crossing |
| ENSDART0000033566  | smad1             | 0.004676707 | 0.486585209  | 1.249927606 | 1.264727704 | 0.536891999  | midline crossing |
| ENSDART00000334523 | tars              | 0.044608572 | 0.184292328  | 0.408838041 | 0.43347383  | 0.219690833  | midline crossing |
| ENSDART00000334784 | adcyp1b           | 0.000144061 | 1.680397515  | 2.015053329 | 1.852069794 | 1.09666998   | midline crossing |
| ENSDART00000334935 | desi2             | 0.009532057 | 0.073850834  | 0.377607475 | 0.427284588 | 0.193399467  | midline crossing |
| ENSDART00000335899 | pkp2              | 0.002199978 | 0.428534184  | 1.016588803 | 1.016153499 | 0.312913104  | midline crossing |
| ENSDART00000336513 | trib3             | 0.00028941  | 0.2074680301 | 0.933969628 | 0.780405513 | 0.230790744  | midline crossing |
| ENSDART00000336668 | psmc1a            | 0.017576487 | 0.311771761  | 0.423109618 | 0.307731242 | 0.107467578  | midline crossing |
| ENSDART00000336703 | pfdn2             | 0.011267245 | 0.369409429  | 0.460943577 | 0.431067405 | 0.197162016  | midline crossing |
| ENSDART00000336797 | uchl1             | 0.000254175 | 1.004812771  | 1.916965558 | 1.938952257 | 1.446591845  | midline crossing |
| ENSDART00000336939 | gadd45ba          | 2.18017E-05 | 1.15110753   | 1.253886794 | 1.06146692  | 0.82843487   | midline crossing |
| ENSDART00000337195 | kif26bb           | 6.9873E-05  | 1.206892082  | 1.55094827  | 1.874551064 | 1.519778039  | midline crossing |
| ENSDART00000337698 | uck2b             | 6.99374E-05 | 0.641974401  | 1.119646558 | 1.077673009 | 0.598617402  | midline crossing |
| ENSDART00000337709 | nol11             | 0.023203992 | 0.254424392  | 0.434300513 | 0.299474854 | 0.102573384  | midline crossing |
| ENSDART00000337846 | focad             | 0.014575529 | 0.435964232  | 0.512370823 | 0.456134064 | 0.112317494  | midline crossing |
| ENSDART00000337850 | dync1li2          | 0.002061124 | 0.268558729  | 0.496891146 | 0.585345447 | 0.309833954  | midline crossing |
| ENSDART00000339443 | tuba8l4           | 0.002876227 | 0.450162666  | 0.547239574 | 0.701695743 | 0.194541839  | midline crossing |
| ENSDART00000339746 | epb41b            | 0.061238247 | 0.556721113  | 0.962382373 | 1.378686301 | 0.45048608   | midline crossing |
| ENSDART00000340066 | adam9             | 0.002930263 | 0.358589887  | 0.583904956 | 0.549640677 | 0.256288209  | midline crossing |
| ENSDART00000340804 | praf2             | 0.017079861 | 0.166225557  | 0.427661756 | 0.402173801 | 0.274020381  | midline crossing |
| ENSDART00000341191 | gyg2              | 0.019039254 | 0.909324979  | 1.617533024 | 1.086480874 | 0.519765295  | midline crossing |
| ENSDART00000341279 | tubb4b            | 0.017496248 | 0.433747505  | 0.468816243 | 0.626770783 | 0.445102188  | midline crossing |
| ENSDART00000341468 | ap1ar             | 0.000902118 | 0.253231094  | 0.535778421 | 0.657902256 | 0.098067269  | midline crossing |
| ENSDART00000341877 | csrnp1a           | 0.000166716 | 1.299872398  | 1.369159722 | 1.350463811 | 0.717287101  | midline crossing |
| ENSDART00000342189 | pdk2b             | 0.007668959 | 0.734399082  | 1.569570791 | 1.007918384 | 0.211070696  | midline crossing |
| ENSDART00000342297 | kdelc1            | 0.002843439 | 0.328425656  | 0.736886183 | 0.437422887 | 0.039597286  | midline crossing |
| ENSDART00000342963 | chst11            | 0.007952083 | 0.296547318  | 0.476599287 | 0.638913095 | 0.263644905  | midline crossing |
| ENSDART00000344154 | tnnt2c            | 0.012339321 | 0.256126919  | 0.781011759 | 0.616305237 | 0.377618007  | midline crossing |
| ENSDART00000345299 | ola1              | 0.002876227 | 0.514191862  | 0.666266592 | 0.533008533 | 0.271611648  | midline crossing |
| ENSDART00000345479 | syta              | 0.022209173 | 0.199773705  | 0.561264928 | 0.42766733  | -0.021116223 | midline crossing |
| ENSDART00000345682 | rrp36             | 0.024581131 | 0.38981283   | 0.603671455 | 0.338055221 | 0.296271067  | midline crossing |
| ENSDART00000346115 | mfsd2aa           | 0.004106312 | 0.413173515  | 1.356876257 | 1.539393726 | 0.598141045  | midline crossing |
| ENSDART00000346209 | acbd7             | 0.004793697 | 0.172970527  | 0.805855312 | 0.630012733 | 0.123911744  | midline crossing |
| ENSDART00000346587 | ap2m1a            | 0.018091301 | 0.393397352  | 0.521859633 | 0.500225377 | 0.048547949  | midline crossing |
| ENSDART00000346973 | capza1a           | 0.016550715 | 0.117659515  | 0.282132124 | 0.303069026 | 0.119362421  | midline crossing |
| ENSDART00000347020 | casp9             | 0.000847723 | 0.406413734  | 0.845063479 | 0.618979742 | 0.291728295  | midline crossing |
| ENSDART00000347073 | oxsr1a            | 0.02511033  | 0.179223329  | 0.268680956 | 0.376160209 | 0.212719894  | midline crossing |
| ENSDART00000348383 | creld2            | 0.024987601 | 0.499343204  | 0.520824125 | 0.482480278 | 0.212076819  | midline crossing |
| ENSDART00000348977 | abcf1             | 0.002096961 | 0.295994115  | 0.413143633 | 0.435605861 | 0.158915281  | midline crossing |
| ENSDART00000349264 | sdr16c5b          | 0.002217387 | 0.496225849  | 0.925512272 | 0.840394736 | 0.492626723  | midline crossing |
| ENSDART00000349373 | cmtr1             | 0.067400884 | 3.529734054  | 4.85424569  | 5.483410402 | 3.408663479  | midline crossing |
| ENSDART00000349434 | scamp4            | 0.020544535 | 0.767657025  | 0.801831806 | 0.544244726 | 0.399234701  | midline crossing |
| ENSDART00000349464 | fermt2            | 0.02086388  | 0.28468341   | 0.302053037 | 0.328009634 | 0.040193822  | midline crossing |
| ENSDART00000351621 | pgam5             | 0.017997171 | 0.243607349  | 0.33552261  | 0.455304621 | 0.149179919  | midline crossing |
| ENSDART00000352168 | hrh3              | 0.001356985 | 0.375251408  | 0.91270689  | 1.213693931 | 0.380712944  | midline crossing |
| ENSDART00000352421 | txnipa            | 0.000860824 | 1.054359781  | 1.031010785 | 1.048664605 | 0.430054853  | midline crossing |
| ENSDART00000352539 | myo1ea            | 0.012462623 | 0.574953247  | 0.619444947 | 0.654028338 | 0.173056841  | midline crossing |
| ENSDART00000352656 | rras2             | 0.005262446 | 0.556656504  | 0.801505793 | 0.534247735 | 0.118931735  | midline crossing |
| ENSDART00000352915 | ash1l             | 0.056562408 | 0.173309311  | 0.167145004 | 0.317504355 | 0.12008578   | midline crossing |
| ENSDART00000353240 | cab39l            | 0.013803709 | 0.313790093  | 0.462769475 | 0.441611468 | 0.290026864  | midline crossing |
| ENSDART00000353304 | si:ch211-114n24.6 | 0.000776925 | 0.627425485  | 0.596987541 | 0.770158215 | 0.21603311   | midline crossing |
| ENSDART00000353325 | tomm40l           | 0.008715601 | 0.351677862  | 0.400415779 | 0.406067875 | 0.134025152  | midline crossing |
| ENSDART00000353925 | mtmr7a            | 0.018204569 | 0.252266702  | 0.492232945 | 0.532543286 | 0.441567176  | midline crossing |
| ENSDART00000354062 | nek12             | 0.002113455 | 0.979847079  | 2.121821413 | 1.72566276  | 1.104924836  | midline crossing |
| ENSDART00000354243 | dpf2l             | 0.013354221 | 0.196558591  | 0.403359284 | 0.517168503 | 0.26603871   | midline crossing |
| ENSDART00000354849 | pls3              | 0.01571154  | 0.365005671  | 0.852391802 | 1.00799598  | 0.660436059  | midline crossing |
| ENSDART00000354987 | actb1             | 0.002610721 | 0.719668079  | 0.845173501 | 0.884967639 | 0.398548729  | midline crossing |
| ENSDART00000355171 | grapa             | 0.005866285 | 0.991444674  | 1.026501701 | 0.907734856 | 0.689609359  | midline crossing |
| ENSDART00000355253 | filip1l           | 0.03479782  | 3.442073683  | 3.796340861 | 4.199635374 | 3.015929109  | midline crossing |
| ENSDART00000355325 | psmb7             | 0.009948051 | 3.620821341  | 3.668842367 | 3.694371073 | 3.321198364  | midline crossing |
| ENSDART00000355609 | atf4b             | 0.027440234 | 0.138344185  | 0.51758353  | 0.353617358 | 0.087935611  | midline crossing |
| ENSDART00000356254 | stap2a            | 0.001692745 | 0.934389037  | 1.208596726 | 1.287672321 | 0.743017194  | midline crossing |
| ENSDART00000356294 | pitrm1            | 0.005065079 | 0.368247543  | 0.389541704 | 0.328836098 | 0.178268037  | midline crossing |
| ENSDART00000356712 | etfdh             | 0.011891263 | 0.23563688   | 0.425716128 | 0.377386118 | 0.136575345  | midline crossing |
| ENSDART00000356865 | ctnbnip1          | 0.001123946 | 0.431885199  | 0.971175617 | 1.010655462 | 0.599546466  | midline crossing |

|                   |                    |             |              |              |              |              |                  |
|-------------------|--------------------|-------------|--------------|--------------|--------------|--------------|------------------|
| ENSDART0000056987 | marcks1a           | 0.024073872 | 0.199644536  | 0.480185443  | 0.561780108  | 0.295794028  | midline crossing |
| ENSDART0000057159 | cacnb1             | 0.000793313 | 1.304600132  | 2.011299334  | 2.307200837  | 1.559835487  | midline crossing |
| ENSDART0000057318 | dusp8b             | 0.001038693 | 0.80659762   | 0.962100249  | 0.680537568  | 0.386784732  | midline crossing |
| ENSDART0000058258 | gng5               | 0.005032085 | 0.433032497  | 0.476321934  | 0.436326472  | 0.078774872  | midline crossing |
| ENSDART0000058485 | rai14              | 0.003945154 | 0.377402754  | 0.592516996  | 0.371359301  | 0.056635681  | midline crossing |
| ENSDART0000059955 | ildr1b             | 0.057189105 | 0.550873694  | 0.893755801  | 0.988897575  | 0.559320969  | midline crossing |
| ENSDART0000060181 | zgc:114174         | 0.000530705 | 0.760260394  | 1.239485919  | 1.043412191  | 0.428827471  | midline crossing |
| ENSDART0000060255 | blmh               | 0.003785955 | 0.318055181  | 0.435968503  | 0.441694486  | 0.152219233  | midline crossing |
| ENSDART0000060812 | adcyp1b            | 0.000184957 | 1.704872196  | 2.272116909  | 1.908485885  | 0.966573225  | midline crossing |
| ENSDART0000060910 | pimr138            | 0.000775407 | 0.646921071  | 1.324373168  | 1.239639246  | 0.98486272   | midline crossing |
| ENSDART0000060919 | qars               | 0.019842178 | 0.348349072  | 0.542908344  | 0.574420452  | 0.306598142  | midline crossing |
| ENSDART0000061196 | NA                 | 0.000874891 | 0.755433358  | 1.498415514  | 1.365853078  | 0.846252469  | midline crossing |
| ENSDART0000062704 | plaa               | 0.003777754 | 0.222653649  | 0.333324552  | 0.491597491  | 0.251933193  | midline crossing |
| ENSDART0000063359 | ucp3               | 0.038034192 | 0.449516929  | 0.816201403  | 1.070983817  | 0.155240874  | midline crossing |
| ENSDART0000063418 | nsun5              | 0.015044537 | 0.551107756  | 0.480901258  | 0.442024494  | 0.196344317  | midline crossing |
| ENSDART0000063912 | jun                | 0.002341904 | 1.166146477  | 1.429328618  | 1.29995447   | 0.480560375  | midline crossing |
| ENSDART0000063950 | psmc1b             | 0.032472485 | 0.214901771  | 0.338782243  | 0.27453656   | 0.103637979  | midline crossing |
| ENSDART0000064032 | EIF4ebp1           | 0.004205562 | 0.426193835  | 0.395196044  | 0.352513449  | 0.114800609  | midline crossing |
| ENSDART0000064067 | ehbp1              | 0.008004874 | 0.439358276  | 0.535882532  | 0.636938582  | 0.35957066   | midline crossing |
| ENSDART0000064311 | arhgdia            | 0.018217202 | 0.49475203   | 0.520698759  | 0.529544756  | 0.127344369  | midline crossing |
| ENSDART0000064462 | psma6l             | 0.016647785 | 0.604857346  | 0.425092318  | 0.840213456  | -0.035624292 | midline crossing |
| ENSDART0000064509 | stmn4l             | 8.18133E-06 | 2.57043941   | 3.576220537  | 3.295095816  | 2.31833518   | midline crossing |
| ENSDART0000064666 | prnpb              | 0.033001298 | 1.397742128  | 1.699664466  | 1.642053833  | 0.642245778  | midline crossing |
| ENSDART0000064789 | txn                | 0.000250511 | 1.421742139  | 1.973125     | 1.39538042   | 0.274434823  | midline crossing |
| ENSDART0000064826 | mov10a             | 0.000860824 | 0.329642907  | 0.141820564  | 0.774895549  | -0.030140661 | midline crossing |
| ENSDART0000064968 | rasgef1bb          | 0.00655086  | 0.10103678   | 0.334291276  | 0.155368522  | -0.094945106 | midline crossing |
| ENSDART0000065563 | ccdc90b            | 0.007961928 | 0.430098539  | 0.770932327  | 0.278586215  | 0.111905478  | midline crossing |
| ENSDART0000065728 | nrsn1              | 0.017738289 | 0.207141455  | 0.540557286  | 0.398847193  | 0.186515655  | midline crossing |
| ENSDART0000065807 | kctd13             | 0.056884231 | 0.261042411  | 0.352189581  | 0.50608049   | 0.336398415  | midline crossing |
| ENSDART0000066385 | hbz                | 0.013081285 | 0.819612283  | 1.064127771  | 1.5494854    | 0.440895582  | midline crossing |
| ENSDART0000066471 | adam8b             | 0.000414404 | 1.018895271  | 1.190253553  | 1.122506289  | 0.517972783  | midline crossing |
| ENSDART0000066760 | cct5               | 0.004847659 | 0.325276039  | 0.436851681  | 0.379245954  | 0.163513221  | midline crossing |
| ENSDART0000067053 | vta1               | 0.003953024 | 0.2430424    | 0.457630564  | 0.367763165  | 0.149685321  | midline crossing |
| ENSDART0000067147 | ANKRD50            | 0.000616782 | 0.122102324  | 0.471943767  | 0.546358337  | 0.270036712  | midline crossing |
| ENSDART0000067168 | pdzrn4             | 0.000390311 | 0.330865082  | 1.464493171  | 1.433744497  | 0.793719225  | midline crossing |
| ENSDART0000067500 | si:key-280e21.3    | 0.004246082 | 0.421024272  | 0.822626751  | 0.979586691  | 0.632877181  | midline crossing |
| ENSDART0000067542 | kcnk10b            | 6.48692E-06 | 2.685681832  | 3.478119742  | 3.471523284  | 2.490421133  | midline crossing |
| ENSDART0000067776 | rab10              | 0.010011285 | 0.291742266  | 0.4211774457 | 0.459760968  | 0.189497347  | midline crossing |
| ENSDART0000073452 | si:ch211-113a14.12 | 0.043318153 | 0.801955974  | 0.847093718  | 0.855214481  | 0.503313711  | midline crossing |
| ENSDART0000073564 | tes                | 0.005380857 | 0.818084026  | 1.011033966  | 0.902633694  | 0.089277909  | midline crossing |
| ENSDART0000073705 | abcf1              | 0.050560604 | 0.284347738  | 0.522430424  | 0.46970431   | 0.327069748  | midline crossing |
| ENSDART0000073735 | rrad               | 0.003154242 | 0.475668516  | 0.908053908  | 0.772751604  | 0.279273357  | midline crossing |
| ENSDART0000073970 | uap1               | 0.000781013 | 0.430311379  | 0.939111864  | 0.868311508  | 0.206630788  | midline crossing |
| ENSDART0000073981 | EIF2s1b            | 0.019981901 | 0.229006291  | 0.299741922  | 0.510349465  | 0.185458194  | midline crossing |
| ENSDART0000074317 | GSK3B (1 of many)  | 0.040539001 | 0.32408852   | 0.570538304  | 0.615748631  | 0.310967098  | midline crossing |
| ENSDART0000074400 | tia1               | 0.004813371 | 0.181056891  | 0.310121029  | 0.46787956   | 0.221267203  | midline crossing |
| ENSDART0000075009 | EIF2s2             | 0.015666457 | 0.324008789  | 0.419532633  | 0.338652657  | 0.07614456   | midline crossing |
| ENSDART0000075129 | lrrc47             | 0.043968276 | 0.095574868  | 0.246973338  | 0.327055852  | 0.135309168  | midline crossing |
| ENSDART0000075187 | pdzd11             | 0.061577067 | 1.031277997  | 1.70516213   | 1.574957324  | 1.135180778  | midline crossing |
| ENSDART0000075299 | zgc:153911         | 1.2193E-05  | 1.082638325  | 2.093301655  | 1.816780233  | 1.137984438  | midline crossing |
| ENSDART0000075351 | zgc:112285         | 0.031816406 | 0.930923442  | 1.110746674  | 0.609701543  | 0.79082813   | midline crossing |
| ENSDART0000075491 | pop5               | 0.007140172 | 0.444559136  | 0.7451635    | 0.571282976  | 0.537107281  | midline crossing |
| ENSDART0000076161 | hoxb5b             | 0.013675681 | 2.652791903  | 3.351280664  | 2.618897772  | 0.864721852  | midline crossing |
| ENSDART0000076571 | rtn1a              | 0.001728686 | 0.31833938   | 1.022959786  | 0.981624341  | 0.706878795  | midline crossing |
| ENSDART0000076600 | rpe65c             | 0.030945673 | 1.983711129  | 2.589375601  | 1.902404689  | 1.435704768  | midline crossing |
| ENSDART0000076815 | NA                 | 0.020105477 | 2.456176486  | 3.15180058   | 2.959048559  | 2.414794476  | midline crossing |
| ENSDART0000077197 | tmsb               | 2.92142E-06 | 1.972985822  | 3.598018383  | 3.544381625  | 2.894174576  | midline crossing |
| ENSDART0000077445 | pim3               | 0.007776904 | -0.017745548 | 0.425023548  | -0.018053873 | 0.016773558  | midline crossing |
| ENSDART0000077484 | zhx2a              | 0.005803283 | 0.117201305  | 0.356185793  | 0.299966576  | 0.024327323  | midline crossing |
| ENSDART0000078156 | srm                | 0.063878819 | 0.127220715  | 0.22303682   | 0.345313656  | 0.085476496  | midline crossing |
| ENSDART0000078304 | lzic               | 0.034279564 | 0.119250866  | 0.44378754   | 0.377529349  | 0.128075007  | midline crossing |
| ENSDART0000078306 | arhgef2            | 0.005059311 | 0.429610468  | 0.807274797  | 0.854804837  | 0.533632211  | midline crossing |
| ENSDART0000078412 | rps8a              | 0.006621714 | 0.416303691  | 0.456350868  | 0.419741526  | 0.122907452  | midline crossing |
| ENSDART0000078438 | NA                 | 0.072487837 | 0.22834743   | 0.583517385  | 0.218267131  | 0.08549295   | midline crossing |
| ENSDART0000078522 | eef1g              | 0.00148037  | 0.462831941  | 0.651007925  | 0.567355432  | 0.209607784  | midline crossing |
| ENSDART0000078543 | syt11b             | 0.000114847 | 0.975892204  | 1.6420197    | 1.925407845  | 1.338618886  | midline crossing |
| ENSDART0000078611 | jac2               | 0.020202236 | 3.404844888  | 3.429750736  | 2.921387124  | 1.113891823  | midline crossing |
| ENSDART0000078949 | afap1l1b           | 6.16509E-05 | 1.061182692  | 1.814819842  | 1.643265844  | 0.877712611  | midline crossing |
| ENSDART0000078953 | afap1l1b           | 0.00092561  | 0.880715307  | 1.833091326  | 1.686561879  | 0.852421188  | midline crossing |
| ENSDART0000079050 | nutf2              | 0.041930419 | 0.337010875  | 0.380281227  | 0.325036311  | 0.156803484  | midline crossing |
| ENSDART0000079173 | lepr               | 0.000168321 | 1.173965688  | 1.129708824  | 0.920018098  | 0.6672678    | midline crossing |
| ENSDART0000079528 | ilk                | 0.003451532 | 0.338564211  | 0.350049719  | 0.346485507  | 0.032055843  | midline crossing |
| ENSDART0000079563 | fas                | 0.029614425 | 0.786193523  | 0.954741877  | 1.62170637   | 0.201092535  | midline crossing |
| ENSDART0000079803 | nmt1b              | 0.044608572 | 0.899927422  | 1.156945789  | 1.408075075  | 0.459974747  | midline crossing |
| ENSDART0000080342 | jod2               | 0.005001984 | 0.375878923  | 0.743043487  | 0.777511515  | 0.447917768  | midline crossing |

|                   |                   |             |             |             |             |              |                  |
|-------------------|-------------------|-------------|-------------|-------------|-------------|--------------|------------------|
| ENSDART0000080351 | dhx57             | 0.034302368 | 0.296631931 | 0.310315824 | 0.343123119 | 0.20162921   | midline crossing |
| ENSDART0000080664 | zgc:86709         | 0.020123282 | 1.428698865 | 3.355720442 | 2.498933956 | 1.732893579  | midline crossing |
| ENSDART0000080829 | hspa14            | 0.003158234 | 0.672662829 | 0.694717457 | 0.8195912   | 0.418167344  | midline crossing |
| ENSDART0000080900 | cfa57             | 0.015156186 | 2.52486974  | 2.757508228 | 2.941219811 | 1.994632033  | midline crossing |
| ENSDART0000081338 | slc9a5            | 0.000216813 | 0.890559011 | 1.045395859 | 1.329125407 | 1.036960607  | midline crossing |
| ENSDART0000081468 | ccdc79            | 0.001875423 | 0.331555315 | 0.505423262 | 0.318137438 | -0.103372006 | midline crossing |
| ENSDART0000081646 | glrx              | 0.001482107 | 0.838457918 | 1.280146822 | 1.066830025 | 0.395822945  | midline crossing |
| ENSDART0000081832 | ptpdc1b           | 0.000675011 | 0.49240902  | 0.580136174 | 0.651643292 | 0.340422756  | midline crossing |
| ENSDART0000081966 | rtn4a             | 0.011135713 | 0.42137623  | 0.811004738 | 0.55995797  | 0.082545275  | midline crossing |
| ENSDART0000082082 | gars              | 0.009491292 | 0.395042441 | 0.664200633 | 0.717176297 | 0.392291214  | midline crossing |
| ENSDART0000082223 | tax1bp3           | 0.002818463 | 0.85130321  | 1.256170012 | 1.075265217 | 0.22088107   | midline crossing |
| ENSDART0000082264 | pxdc1b            | 0.000212316 | 0.801924492 | 1.033443039 | 0.634881962 | 0.139425975  | midline crossing |
| ENSDART0000082434 | tgif1             | 1.75467E-05 | 0.336619688 | 1.229522702 | 1.441745222 | 0.912580325  | midline crossing |
| ENSDART0000082715 | camsap3           | 0.001948843 | 0.302702799 | 0.347512275 | 0.333666179 | -0.022433363 | midline crossing |
| ENSDART0000082830 | KIAA0895L         | 0.000166256 | 0.216380627 | 0.852873359 | 0.835551488 | 0.401334264  | midline crossing |
| ENSDART0000082983 | clip2             | 0.000480106 | 0.69105479  | 0.899482735 | 1.166942455 | 0.710683744  | midline crossing |
| ENSDART0000083467 | parp8             | 0.025639797 | 0.336619688 | 0.399001121 | 0.399118225 | 0.307424215  | midline crossing |
| ENSDART0000083890 | usp24             | 0.033976169 | 0.219267617 | 0.201082864 | 0.325420731 | 0.216599954  | midline crossing |
| ENSDART0000084184 | aimp1             | 0.018217202 | 0.209084138 | 0.262090446 | 0.396284966 | 0.096096937  | midline crossing |
| ENSDART0000084373 | frmd4bb           | 0.000871881 | 0.582631667 | 0.828834738 | 0.835563839 | 0.412330382  | midline crossing |
| ENSDART0000084771 | pde9a             | 0.000212316 | 0.36076081  | 1.443202889 | 1.33955445  | 1.070879094  | midline crossing |
| ENSDART0000085135 | tbl1x             | 0.004493561 | 0.180884774 | 0.566948084 | 0.5040067   | 0.049402086  | midline crossing |
| ENSDART0000085528 | zgc:158659        | 0.002794034 | 0.601601674 | 0.738184978 | 0.82446023  | 0.805817257  | midline crossing |
| ENSDART0000085894 | pgm5              | 0.000309757 | 1.697021259 | 1.783911903 | 2.232651815 | 1.757015772  | midline crossing |
| ENSDART0000087991 | fn3c3bb           | 0.000250511 | 0.509196457 | 0.583942244 | 0.486760061 | 0.158477497  | midline crossing |
| ENSDART0000088141 | ankrd34bb         | 7.10385E-05 | 1.379198636 | 2.420328938 | 2.155206475 | 1.17838067   | midline crossing |
| ENSDART0000088290 | raph1b            | 0.018433591 | 0.812305175 | 0.733830465 | 0.671238907 | 0.330964135  | midline crossing |
| ENSDART0000090174 | dock9b            | 0.004106215 | 0.356010204 | 0.810416379 | 0.943578275 | 0.58912554   | midline crossing |
| ENSDART0000090406 | dock11            | 0.003111385 | 0.704689621 | 0.535408523 | 0.615472635 | 0.363574103  | midline crossing |
| ENSDART0000090771 | cyth1a            | 0.00507534  | 1.102348748 | 1.012723243 | 0.839881021 | 0.442796833  | midline crossing |
| ENSDART0000091140 | snx21             | 0.036614379 | 0.278697916 | 0.637246869 | 0.128859029 | 0.534229621  | midline crossing |
| ENSDART0000091409 | smarcd1a          | 0.010885977 | 0.370815487 | 0.374702329 | 0.447117461 | 0.290143851  | midline crossing |
| ENSDART0000092884 | lrrc58b           | 0.002894799 | 0.353547699 | 0.596933578 | 0.36096561  | 0.06120599   | midline crossing |
| ENSDART0000097176 | CAB201090749.1    | 0.000169264 | 1.277443607 | 2.06888261  | 1.727457254 | 0.676889483  | midline crossing |
| ENSDART0000097194 | serinc5           | 0.057511608 | 0.184853776 | 0.289193819 | 0.374387724 | 0.244648582  | midline crossing |
| ENSDART0000098285 | atf5a             | 0.018496153 | 0.558593719 | 0.754458044 | 0.445954377 | 0.160619888  | midline crossing |
| ENSDART0000098750 | pdlim5b           | 0.005948998 | 0.340621907 | 0.643165703 | 0.410131138 | 0.075261902  | midline crossing |
| ENSDART0000099102 | sept5a            | 0.003118176 | 0.488119217 | 0.804836681 | 0.729175054 | 0.142689277  | midline crossing |
| ENSDART0000099248 | rabggtb           | 0.029966068 | 0.075526469 | 0.438084725 | 0.330428907 | 0.205346366  | midline crossing |
| ENSDART0000099566 | si:ch211-244022.2 | 0.032262181 | 0.576141852 | 0.625409237 | 0.697152634 | 0.270183175  | midline crossing |
| ENSDART0000099690 | fam129ab          | 0.000806652 | 1.024572276 | 1.489725431 | 1.470862577 | 0.737761428  | midline crossing |
| ENSDART0000099764 | zgc:153031        | 0.034733648 | 0.216426658 | 0.538240257 | 0.500334626 | 0.476962119  | midline crossing |
| ENSDART0000099769 | ccdc22            | 0.012893882 | 0.325453994 | 0.346355629 | 0.367424682 | 0.130188245  | midline crossing |
| ENSDART0000099849 | arntl2            | 9.24337E-05 | 0.982355145 | 1.78511579  | 1.609893892 | 1.255639962  | midline crossing |
| ENSDART0000100156 | agpat4            | 0.000784082 | 1.221504112 | 1.6039826   | 1.49974957  | 0.799345848  | midline crossing |
| ENSDART0000100415 | map3k7cl          | 0.000292971 | 1.690116609 | 2.517738065 | 2.168584787 | 1.392466275  | midline crossing |
| ENSDART0000101204 | alcamb            | 4.11188E-05 | 1.334306533 | 2.490758317 | 2.513428399 | 1.826617796  | midline crossing |
| ENSDART0000101943 | rragca            | 0.024838127 | 0.302260739 | 0.264945177 | 0.40523597  | 0.261316897  | midline crossing |
| ENSDART0000102260 | si:dkey-222f8.3   | 0.01219127  | 0.869989363 | 1.191058069 | 0.864781519 | 0.175715859  | midline crossing |
| ENSDART0000102411 | dctn1b            | 0.062774652 | 0.519457248 | 0.529061234 | 0.697567556 | 0.548863629  | midline crossing |
| ENSDART0000102419 | igf2bp2a          | 0.009024763 | 0.598022036 | 0.736011973 | 0.87621145  | 0.419702221  | midline crossing |
| ENSDART0000102672 | nck2a             | 0.019099714 | 0.205356684 | 0.423877669 | 0.371996615 | 0.147611944  | midline crossing |
| ENSDART0000102843 | src               | 0.04997602  | 0.33102086  | 0.263030754 | 0.362117443 | 0.2047457    | midline crossing |
| ENSDART0000102952 | suz12a            | 0.000445792 | 0.614499433 | 0.610664915 | 0.72051821  | 0.430761521  | midline crossing |
| ENSDART0000103463 | dnajc2            | 0.048389146 | 0.193851448 | 0.30912042  | 0.441518195 | 0.223806707  | midline crossing |
| ENSDART0000103753 | fn1a              | 0.044310242 | 2.705855593 | 3.095500526 | 2.8206804   | 2.144837328  | midline crossing |
| ENSDART0000103755 | fn1b              | 0.006568275 | 4.126396153 | 4.640072685 | 4.590004259 | 2.904538972  | midline crossing |
| ENSDART0000103911 | CAB201077217.1    | 0.031270127 | 0.385992878 | 0.554652123 | 0.464993777 | 0.2375762    | midline crossing |
| ENSDART0000104317 | kif7b             | 0.000976528 | 0.389436838 | 1.156291561 | 1.140404424 | 0.652703479  | midline crossing |
| ENSDART0000104616 | lepr              | 0.000171958 | 0.762949533 | 0.720319043 | 0.625239528 | 0.526452567  | midline crossing |
| ENSDART0000105399 | cbarpb            | 0.001847721 | 0.427437854 | 0.525694666 | 0.646908744 | 0.015511077  | midline crossing |
| ENSDART0000105597 | si:ch211-129c21.1 | 0.007788648 | 3.291282195 | 4.994402871 | 3.669154828 | 0.685912998  | midline crossing |
| ENSDART0000105767 | fhl1a             | 0.018500869 | 0.562168934 | 1.496722819 | 1.339494009 | 0.93265064   | midline crossing |
| ENSDART0000105898 | TSTD1             | 0.006964515 | 0.614724746 | 0.98570488  | 0.724640457 | 0.337367855  | midline crossing |
| ENSDART0000106048 | ctnnd1            | 0.001938223 | 0.632970644 | 0.745690204 | 0.779606908 | 0.274224061  | midline crossing |
| ENSDART0000106081 | BX511034.2        | 0.013026885 | 0.124750693 | 0.347355362 | 0.433795514 | 0.117013159  | midline crossing |
| ENSDART0000106172 | rac1a             | 0.010965837 | 0.326396929 | 0.503439113 | 0.328932342 | 0.053159748  | midline crossing |
| ENSDART0000108493 | gareml            | 0.000703816 | 2.608537205 | 3.376838547 | 3.284344596 | 2.814340641  | midline crossing |
| ENSDART0000108596 | zgc:162150        | 0.006040855 | 0.993292495 | 1.420859127 | 1.257973066 | 0.026357222  | midline crossing |
| ENSDART0000108831 | espnla            | 0.018765627 | 0.888146475 | 0.74973908  | 0.792131149 | 0.719500985  | midline crossing |
| ENSDART0000108963 | CAB201102109.1    | 0.0044585   | 0.394501993 | 0.771748701 | 0.296144389 | 0.075524582  | midline crossing |
| ENSDART0000109138 | hbegfa            | 6.40327E-05 | 0.956645779 | 1.991576979 | 1.27153829  | 0.330229075  | midline crossing |
| ENSDART0000109252 | nudt5             | 0.003219301 | 0.602324776 | 0.61383313  | 0.580277921 | 0.203918347  | midline crossing |
| ENSDART0000109319 | arf1              | 0.004134049 | 0.284053831 | 0.377774948 | 0.307132687 | 0.034662092  | midline crossing |
| ENSDART0000109425 | nkd3              | 0.010173969 | 3.023582344 | 2.734865433 | 2.70294964  | 2.317338999  | midline crossing |

|                    |                    |             |             |             |             |              |                  |
|--------------------|--------------------|-------------|-------------|-------------|-------------|--------------|------------------|
| ENSDART00000109535 | gmps               | 0.012765568 | 0.181071124 | 0.257853381 | 0.376587367 | 0.112990813  | midline crossing |
| ENSDART00000109552 | baz2ba             | 0.004360669 | 0.627489244 | 0.525669422 | 0.712410774 | 0.393101067  | midline crossing |
| ENSDART00000109573 | akap6              | 0.000144061 | 0.927127599 | 1.241947706 | 1.04133516  | 0.789730231  | midline crossing |
| ENSDART00000109759 | tmx2a              | 4.58725E-05 | 2.647169883 | 3.21425121  | 2.659532867 | 1.569734674  | midline crossing |
| ENSDART00000110040 | sox11a             | 8.488E-05   | 1.573346229 | 1.723237215 | 1.23195588  | 0.781584101  | midline crossing |
| ENSDART00000110064 | plaua              | 0.00106989  | 1.293433748 | 1.730730518 | 1.0162544   | 0.507140212  | midline crossing |
| ENSDART00000110478 | zgc:174906         | 0.002541273 | 0.44828184  | 1.063594358 | 0.857934554 | 0.434989632  | midline crossing |
| ENSDART00000110497 | tmem63a            | 0.008300402 | 0.205919412 | 0.504153398 | 0.414725435 | 0.171827856  | midline crossing |
| ENSDART00000110622 | si:ch211-222i21.1  | 0.004840707 | 0.830701135 | 0.950120833 | 0.646058632 | 0.069324807  | midline crossing |
| ENSDART00000110627 | EPB41L1            | 0.000414404 | 0.536765101 | 1.012243023 | 0.739789984 | 0.259906496  | midline crossing |
| ENSDART00000110777 | eef1db             | 0.022054847 | 0.19406492  | 0.18930318  | 0.407362874 | -0.014164442 | midline crossing |
| ENSDART00000111324 | zgc:193807         | 0.018752626 | 2.638791453 | 3.489955154 | 3.039693941 | 3.396234279  | midline crossing |
| ENSDART00000111706 | si:dkey-108k21.14  | 0.021895107 | 0.247906553 | 1.05338345  | 1.058888091 | 0.439899526  | midline crossing |
| ENSDART00000111707 | cacnb1             | 0.000480969 | 1.693120335 | 2.349827744 | 2.415610432 | 1.652036859  | midline crossing |
| ENSDART00000111923 | ajuba              | 0.004299513 | 0.639088613 | 1.058968297 | 0.866425943 | 0.103913512  | midline crossing |
| ENSDART00000111966 | arhgef10lb         | 0.003104562 | 0.250651161 | 0.391053857 | 0.470093443 | 0.290981355  | midline crossing |
| ENSDART00000112022 | si:ch211-180f4.1   | 1.23761E-05 | 2.108953042 | 1.952679055 | 1.909638244 | 1.352861352  | midline crossing |
| ENSDART00000112550 | mapk9              | 0.000730604 | 0.429625805 | 0.878911558 | 0.999507915 | 0.700660398  | midline crossing |
| ENSDART00000112698 | RNF14 (1 of many)  | 0.001654051 | 0.142790619 | 0.542852416 | 0.218671557 | 0.088301354  | midline crossing |
| ENSDART00000112926 | adora1b            | 0.026842776 | 0.387978003 | 0.609753862 | 0.576471225 | 0.261995134  | midline crossing |
| ENSDART00000113101 | smarcad1b          | 0.003021903 | 0.481835623 | 0.651517984 | 0.685097173 | 0.491069329  | midline crossing |
| ENSDART00000113241 | tmem163a           | 0.011023029 | 0.329551441 | 0.273820345 | 0.385569684 | 0.333416277  | midline crossing |
| ENSDART00000113532 | CAB201053588.1     | 8.39504E-05 | 0.66169386  | 1.399901635 | 1.305166578 | 0.721799042  | midline crossing |
| ENSDART00000113699 | hgf6               | 0.002024233 | 1.149006949 | 1.556415854 | 1.569424226 | 0.45979101   | midline crossing |
| ENSDART00000113732 | orc6               | 0.018651417 | 1.104098282 | 1.496929933 | 0.974585154 | 0.388395497  | midline crossing |
| ENSDART00000113752 | si:dkey-6i22.5     | 0.014624499 | 1.012202134 | 1.421252013 | 0.919204178 | 0.319242336  | midline crossing |
| ENSDART00000114024 | fam107b            | 0.002708716 | 0.899175294 | 1.079533729 | 0.969523488 | 0.434748246  | midline crossing |
| ENSDART00000114168 | itga6a             | 0.000135341 | 1.998266436 | 2.016280588 | 1.463165074 | 0.79739173   | midline crossing |
| ENSDART00000114272 | nop2               | 0.02328328  | 0.471489342 | 0.531037709 | 0.420888693 | 0.177047326  | midline crossing |
| ENSDART00000114497 | si:dkey-204i11.1   | 0.008595135 | 0.312589581 | 0.828199841 | 0.99726607  | 0.068811015  | midline crossing |
| ENSDART00000115244 | MEX3A              | 8.28889E-05 | 1.222333965 | 1.709642669 | 1.90049694  | 1.354844663  | midline crossing |
| ENSDART00000115403 | NAV1 (1 of many)   | 8.51245E-05 | 0.648363377 | 0.712988904 | 0.734499876 | 0.497918559  | midline crossing |
| ENSDART00000118384 | SNORA16            | 0.046563471 | 0.565934898 | 0.9072012   | 0.499756229 | 0.494901316  | midline crossing |
| ENSDART00000121861 | prph               | 0.000935288 | 1.238160677 | 2.697856064 | 2.616616233 | 2.213149799  | midline crossing |
| ENSDART00000121886 | hdr                | 0.013310088 | 3.187835864 | 3.220765325 | 3.322516101 | 2.611876044  | midline crossing |
| ENSDART00000122102 | wee1               | 1.91914E-05 | 1.082199278 | 1.291191801 | 0.972164457 | 0.241130696  | midline crossing |
| ENSDART00000122305 | Metazoa_SRP        | 0.002202211 | 1.452964427 | 1.874874084 | 1.874716847 | 1.224958179  | midline crossing |
| ENSDART00000122433 | trim3l             | 0.029170799 | 0.38510745  | 0.766516023 | 0.671400212 | 0.185347257  | midline crossing |
| ENSDART00000122628 | junba              | 0.016136147 | 0.280813702 | 0.583374691 | 0.41181471  | 0.073998168  | midline crossing |
| ENSDART00000123096 | marcsa             | 1.28435E-05 | 1.85087225  | 2.605359702 | 2.620602183 | 2.013819083  | midline crossing |
| ENSDART00000123203 | vbp1               | 0.026626189 | 0.24089733  | 0.440645383 | 0.41864886  | 0.239214051  | midline crossing |
| ENSDART00000123254 | dpp9               | 0.014674041 | 0.199548032 | 0.283576523 | 0.332661933 | 0.196698648  | midline crossing |
| ENSDART00000123263 | phf20a             | 0.000701449 | 3.204242437 | 4.684552705 | 5.028378766 | 3.758919167  | midline crossing |
| ENSDART00000123409 | si:ch1073-296d18.1 | 0.016381291 | 0.174260872 | 0.155958113 | 0.452524339 | -0.02334577  | midline crossing |
| ENSDART00000123559 | znf521             | 0.000648976 | 1.710422257 | 2.255410725 | 1.850379402 | 0.814044199  | midline crossing |
| ENSDART00000123878 | ppiaa              | 0.001021091 | 0.40248836  | 0.711363911 | 0.687992513 | 0.279031014  | midline crossing |
| ENSDART00000123972 | smarca5            | 0.039476911 | 0.189313952 | 0.223635359 | 0.34449924  | 0.204975788  | midline crossing |
| ENSDART00000124660 | asc3               | 0.010970596 | 0.285037378 | 0.269547515 | 0.334772964 | 0.241795126  | midline crossing |
| ENSDART00000124809 | acsbg2             | 4.91848E-05 | 0.494562304 | 1.915512609 | 1.979085784 | 0.982887956  | midline crossing |
| ENSDART00000124991 | lmcd1              | 0.002680527 | 2.103120162 | 2.716646733 | 2.223480288 | 1.685964001  | midline crossing |
| ENSDART00000124998 | rtn2a              | 0.001225897 | 0.520408534 | 1.345034307 | 1.147677305 | 0.715797789  | midline crossing |
| ENSDART00000125349 | bada               | 0.001185711 | 0.528966306 | 1.266997252 | 1.043776037 | 0.694034948  | midline crossing |
| ENSDART00000125371 | mknk1              | 0.001093301 | 0.126961076 | 0.659607861 | 0.524109906 | -0.03336174  | midline crossing |
| ENSDART00000125971 | gpc1b              | 0.020961781 | 0.246742539 | 0.417837609 | 0.415208578 | 0.061504531  | midline crossing |
| ENSDART00000126038 | tcp1               | 0.031160253 | 0.327351769 | 0.30721299  | 0.45795341  | 0.229539742  | midline crossing |
| ENSDART00000126041 | ano10a             | 0.016565752 | 0.295415156 | 0.394412522 | 0.244334431 | 0.10037004   | midline crossing |
| ENSDART00000126260 | anxa6              | 0.059606535 | 0.678382414 | 0.731151807 | 0.839317026 | 0.481712468  | midline crossing |
| ENSDART00000126414 | eml1               | 0.019102956 | 0.475872706 | 0.625227433 | 0.675164018 | 0.217118522  | midline crossing |
| ENSDART00000126474 | si:ch211-265o23.1  | 0.039039737 | 1.117262816 | 1.407297939 | 1.180818753 | 0.875131455  | midline crossing |
| ENSDART00000126866 | ccser2b            | 0.025259321 | 0.139738782 | 0.390945754 | 0.269322283 | 0.164198289  | midline crossing |
| ENSDART00000127420 | MDP1               | 3.63088E-06 | 1.927039626 | 2.737884833 | 2.522148059 | 1.176014094  | midline crossing |
| ENSDART00000127695 | rpl5b              | 0.003761148 | 0.469645013 | 0.524119827 | 0.418266352 | 0.096930554  | midline crossing |
| ENSDART00000127699 | si:ch73-335i21.4   | 0.002818463 | 1.682684641 | 2.104012275 | 1.803809975 | 0.730936452  | midline crossing |
| ENSDART00000127977 | CAB201016547.1     | 0.016879359 | 2.8163175   | 2.999575494 | 2.826245437 | 2.227407522  | midline crossing |
| ENSDART00000128050 | UTP14C             | 0.001174125 | 0.741190051 | 0.667056074 | 0.681031837 | 0.432356782  | midline crossing |
| ENSDART00000128284 | nudt9              | 0.002466999 | 0.256265084 | 0.958235099 | 0.875663921 | 0.386996856  | midline crossing |
| ENSDART00000128346 | si:ch211-108c6.2   | 0.021500865 | 1.285191812 | 1.464423055 | 1.491945601 | 0.337219819  | midline crossing |
| ENSDART00000128624 | sgk494a            | 0.001650308 | 0.606573335 | 0.929157278 | 0.662849036 | 0.240608511  | midline crossing |
| ENSDART00000128715 | kif3cb             | 0.000188131 | 0.538226215 | 1.727920879 | 1.708926367 | 1.162753729  | midline crossing |
| ENSDART00000128894 | dchs1b             | 0.040504381 | 0.298598944 | 0.508598812 | 0.623831745 | 0.178131833  | midline crossing |
| ENSDART00000128931 | igf2bp2a           | 0.017671888 | 1.122085018 | 1.168437537 | 1.475101165 | 0.642256664  | midline crossing |
| ENSDART00000129362 | eef1a1i2           | 0.00039492  | 2.651521704 | 2.343527866 | 2.861864827 | 2.05813724   | midline crossing |
| ENSDART00000129423 | slc37a1            | 0.001367004 | 0.300742512 | 0.561138843 | 0.611837666 | 0.153755959  | midline crossing |
| ENSDART00000129593 | znf217             | 0.055515409 | 0.260126556 | 0.54491492  | 0.40143457  | 0.121556273  | midline crossing |
| ENSDART00000129674 | slc44a2            | 0.015120147 | 0.253178883 | 0.658899779 | 0.831363022 | 0.428394942  | midline crossing |



|                    |                   |             |             |             |             |              |                  |
|--------------------|-------------------|-------------|-------------|-------------|-------------|--------------|------------------|
| ENSDART00000129749 | psmb7             | 0.002585852 | 0.370284184 | 0.518350984 | 0.484691258 | 0.174219127  | midline crossing |
| ENSDART00000129772 | gck               | 0.004578126 | 2.162290839 | 3.39609934  | 3.505078852 | 1.699355805  | midline crossing |
| ENSDART00000129895 | paln1b            | 0.013143068 | 0.197850318 | 0.594118975 | 0.532496272 | 0.226704229  | midline crossing |
| ENSDART00000129975 | scamp4            | 0.001296944 | 0.678060482 | 0.570045099 | 0.569688168 | 0.357822663  | midline crossing |
| ENSDART00000130277 | rpl9              | 0.000286897 | 0.669628298 | 0.786807801 | 0.580702605 | 0.163431583  | midline crossing |
| ENSDART00000130343 | parp12a           | 0.011523209 | 0.340672377 | 0.108363497 | 1.07497332  | -0.29758817  | midline crossing |
| ENSDART00000130353 | fdps              | 0.049349672 | 0.408185548 | 0.643895342 | 0.766681528 | 0.202680939  | midline crossing |
| ENSDART00000130472 | pkhd11            | 0.064070454 | 0.896390148 | 0.750907757 | 1.185805195 | 0.60737198   | midline crossing |
| ENSDART00000130626 | rars              | 0.001161091 | 0.486608727 | 0.578942242 | 0.46060205  | 0.253410521  | midline crossing |
| ENSDART00000130675 | pi4k2a            | 0.002785677 | 0.32642219  | 0.46314623  | 0.446740681 | 0.229275132  | midline crossing |
| ENSDART00000130815 | e2f3              | 0.079057004 | 0.222958128 | 0.350714695 | 0.469146338 | 0.300980509  | midline crossing |
| ENSDART00000130820 | hbegfb            | 0.000370918 | 1.26577708  | 2.42087461  | 1.934889729 | 0.952474054  | midline crossing |
| ENSDART00000131768 | abi1a             | 0.011319743 | 0.352423076 | 0.342648792 | 0.429769283 | 0.194498692  | midline crossing |
| ENSDART00000131861 | tmsb2             | 0.01863352  | 0.228394728 | 0.766531981 | 0.776266217 | 0.553413207  | midline crossing |
| ENSDART00000131922 | ucp3              | 0.045293752 | 0.966573752 | 1.664449524 | 1.416927563 | 1.012896527  | midline crossing |
| ENSDART00000131940 | si:dkey-30c15.10  | 0.000543419 | 1.656397572 | 1.745533662 | 1.503033451 | 0.676482739  | midline crossing |
| ENSDART00000131956 | si:dkey-33c12.14  | 0.026803174 | 2.548697019 | 3.072973071 | 2.718694487 | 2.992696235  | midline crossing |
| ENSDART00000132146 | hsd17b7           | 0.043380755 | 2.880324202 | 3.535090877 | 2.510243514 | 2.078786507  | midline crossing |
| ENSDART00000132156 | cirbpb            | 0.03016157  | 0.302166347 | 0.411233461 | 0.214244406 | 0.367929369  | midline crossing |
| ENSDART00000132297 | adam9             | 0.003234084 | 0.312303854 | 0.492550355 | 0.565368245 | 0.224580764  | midline crossing |
| ENSDART00000132386 | si:dkey-21e2.15   | 0.014410292 | 2.037905679 | 4.749110822 | 3.364621679 | 1.867440085  | midline crossing |
| ENSDART00000132426 | stmn4             | 0.000135804 | 0.67103814  | 1.650930846 | 1.637640616 | 1.211182541  | midline crossing |
| ENSDART00000132437 | mknk2a            | 0.012665885 | 1.021696261 | 1.216138852 | 0.746540318 | 1.080690265  | midline crossing |
| ENSDART00000132663 | si:ch211-163b2.4  | 0.00520796  | 0.547936584 | 0.995221531 | 0.769857122 | 0.372703166  | midline crossing |
| ENSDART00000132696 | nckap1            | 0.003535619 | 0.316973126 | 0.759090684 | 0.845846182 | 0.627500278  | midline crossing |
| ENSDART00000132781 | si:dkey-78l4.1    | 0.00038013  | 3.429067431 | 4.682405989 | 3.946041907 | 2.798505508  | midline crossing |
| ENSDART00000132788 | uap1              | 0.011788375 | 1.271261725 | 1.549537095 | 1.061485612 | 0.525207108  | midline crossing |
| ENSDART00000132982 | leng9             | 0.002204563 | 3.031473639 | 2.780356944 | 2.241298703 | 1.634482288  | midline crossing |
| ENSDART00000133030 | psmd1             | 0.054998036 | 3.699340083 | 3.88833786  | 2.358920441 | 3.148062929  | midline crossing |
| ENSDART00000133183 | parp8             | 0.045069362 | 0.666223987 | 0.351288157 | 0.707539986 | 0.438871753  | midline crossing |
| ENSDART00000133497 | si:dkey-250k15.4  | 0.028695396 | 0.495799772 | 1.080770342 | 1.149092422 | 0.612727116  | midline crossing |
| ENSDART00000133628 | ankib1a           | 0.004447566 | 0.478883806 | 0.425404685 | 0.598914996 | 0.306729273  | midline crossing |
| ENSDART00000133708 | arhgef4           | 0.03479782  | 0.196005293 | 0.61534617  | 0.621912538 | 0.36146972   | midline crossing |
| ENSDART00000133775 | pdlim3b           | 0.031565534 | 2.202802348 | 2.787120555 | 2.295385553 | 1.784176005  | midline crossing |
| ENSDART00000133954 | mhc1uka           | 4.64299E-05 | 4.819339023 | 5.453978456 | 5.536236268 | 3.849327613  | midline crossing |
| ENSDART00000133968 | camkmt            | 0.014401489 | 0.353110068 | 0.455754701 | 0.544139309 | 0.380701512  | midline crossing |
| ENSDART00000134094 | zgc:162193        | 0.04742464  | 0.951212203 | 1.108680472 | 1.240038838 | 0.640044887  | midline crossing |
| ENSDART00000134269 | fkbp1aa           | 0.020289809 | 0.162085973 | 0.545601006 | 0.44355879  | 0.374542557  | midline crossing |
| ENSDART00000134658 | slc44a1a          | 0.029185454 | 0.707497042 | 0.591443803 | 0.629657706 | 0.651062281  | midline crossing |
| ENSDART00000134787 | elavl4            | 0.000177237 | 1.466773831 | 1.526430349 | 1.657041106 | 1.070021064  | midline crossing |
| ENSDART00000134843 | sst6              | 0.005534146 | 1.638903894 | 2.735989277 | 2.458183626 | 2.301951228  | midline crossing |
| ENSDART00000135093 | ola1              | 0.004885993 | 0.415909116 | 0.691871408 | 0.432580712 | -0.033470782 | midline crossing |
| ENSDART00000135356 | nabp1a            | 0.057008548 | 0.371235634 | 0.392313666 | 0.26759026  | 0.229305948  | midline crossing |
| ENSDART00000135415 | dysf              | 0.021103936 | 3.146286589 | 3.204629318 | 3.124686608 | 3.126558821  | midline crossing |
| ENSDART00000135631 | myl6              | 0.006911648 | 0.462877699 | 0.806124657 | 0.938068157 | 0.529055927  | midline crossing |
| ENSDART00000135661 | slc20a1a          | 0.021002038 | 1.716116201 | 1.644628019 | 1.747440585 | 0.991048186  | midline crossing |
| ENSDART00000135973 | nfyal             | 0.007974988 | 0.202128253 | 0.401502491 | 0.256237772 | 0.346886156  | midline crossing |
| ENSDART00000136152 | calua             | 0.009163406 | 0.347598327 | 0.562237059 | 0.505429013 | 0.302262295  | midline crossing |
| ENSDART00000136182 | si:ch211-222n4.2  | 0.000461528 | 2.334818577 | 2.498262776 | 2.056155354 | 0.938824321  | midline crossing |
| ENSDART00000136187 | bloc1s4           | 0.017000306 | 0.27836522  | 0.479128543 | 0.397988078 | 0.159673351  | midline crossing |
| ENSDART00000136296 | CR847543.2        | 0.012261156 | 0.7189738   | 0.800339311 | 1.432214548 | 0.183639146  | midline crossing |
| ENSDART00000136492 | si:ch211-158d24.4 | 0.020892176 | 0.620322947 | 0.916930916 | 0.610223614 | 0.170743477  | midline crossing |
| ENSDART00000136761 | prkx              | 0.002147221 | 0.698491961 | 1.03323314  | 0.943847516 | 0.577218336  | midline crossing |
| ENSDART00000136782 | si:dkey-24c2.7    | 3.29362E-06 | 4.902793471 | 4.654641885 | 4.451812012 | 3.610899339  | midline crossing |
| ENSDART00000136830 | stmn4l            | 0.000324566 | 1.323269884 | 1.682347243 | 1.639725976 | 1.096832109  | midline crossing |
| ENSDART00000136873 | clasp2            | 0.012069725 | 0.301439566 | 0.245236713 | 0.309865242 | 0.356365378  | midline crossing |
| ENSDART00000136910 | armc1l            | 0.0517318   | 0.626427947 | 0.775572599 | 0.634581641 | 0.292392529  | midline crossing |
| ENSDART00000136943 | si:dkey-21e2.13   | 0.047530035 | 2.273396315 | 3.247336732 | 1.860650754 | 0.467276759  | midline crossing |
| ENSDART00000137036 | ppiaa             | 0.007708544 | 0.323927062 | 0.685997539 | 0.775560135 | 0.372712842  | midline crossing |
| ENSDART00000137110 | sepw1             | 0.028322957 | 0.165066135 | 0.642417047 | 0.502149684 | 0.242826446  | midline crossing |
| ENSDART00000137309 | gemin5            | 0.01891028  | 0.29381973  | 0.279160353 | 0.398962684 | 0.210137956  | midline crossing |
| ENSDART00000137325 | mvp               | 0.001650308 | 1.415505945 | 1.485945809 | 1.461661333 | 0.448751577  | midline crossing |
| ENSDART00000137471 | MFAP4 (1 of many) | 0.067929911 | 1.677720699 | 2.807166131 | 2.128226179 | 1.146528193  | midline crossing |
| ENSDART00000137782 | yif1a             | 0.072487837 | 0.379643142 | 0.667454267 | 0.241343175 | 0.280143891  | midline crossing |
| ENSDART00000137795 | ssrp1a            | 0.014296946 | 0.416335187 | 0.470997147 | 0.449691903 | 0.161896374  | midline crossing |
| ENSDART00000138094 | eef1b2            | 0.002299086 | 0.3943229   | 0.586163757 | 0.433468435 | 0.083803882  | midline crossing |
| ENSDART00000138143 | si:ch211-233m11.1 | 0.012369008 | 0.782546411 | 0.773895723 | 0.974137465 | 0.285762089  | midline crossing |
| ENSDART00000138350 | rps12             | 0.000740604 | 0.592717981 | 0.744811164 | 0.572850481 | 0.279364485  | midline crossing |
| ENSDART00000138351 | cth               | 0.000144591 | 1.012814265 | 1.438428325 | 1.066275824 | 0.495805428  | midline crossing |
| ENSDART00000138606 | las1l             | 0.028216825 | 0.170918093 | 0.302723725 | 0.361920168 | 0.174466647  | midline crossing |
| ENSDART00000138621 | zgc:153867        | 0.004376172 | 3.188427096 | 3.682050782 | 3.111570491 | 2.809604178  | midline crossing |
| ENSDART00000138633 | cd99              | 0.001871569 | 1.201301736 | 1.818711588 | 1.295470825 | 0.581149232  | midline crossing |
| ENSDART00000138821 | nfil3             | 0.000101984 | 1.376309909 | 2.121391468 | 1.99718084  | 1.39511595   | midline crossing |
| ENSDART00000138915 | cirbpb            | 0.015289564 | 0.297824374 | 0.314736859 | 0.24846932  | 0.269446209  | midline crossing |
| ENSDART00000139002 | dus2              | 0.040333038 | 0.373595906 | 0.357863942 | 0.47349873  | 0.230284081  | midline crossing |

|                    |                   |             |              |             |              |              |                  |
|--------------------|-------------------|-------------|--------------|-------------|--------------|--------------|------------------|
| ENSDART00000139176 | eif2s3            | 0.02245917  | 0.381558608  | 0.49753559  | 0.407153714  | 0.243011405  | midline crossing |
| ENSDART00000139241 | rnf38             | 0.0044585   | 0.363207367  | 0.385948281 | 0.537494883  | 0.39766179   | midline crossing |
| ENSDART00000139259 | zfand5b           | 0.022389941 | 0.677389122  | 0.588881516 | 0.462655957  | 0.625250498  | midline crossing |
| ENSDART00000139392 | rras              | 0.003337326 | 2.928045636  | 3.065800127 | 2.84735064   | 1.624630606  | midline crossing |
| ENSDART00000139412 | SMIM18            | 0.035424549 | 0.730335352  | 0.956017708 | 0.99931328   | 0.671209714  | midline crossing |
| ENSDART00000139449 | si:dkey-147f3.4   | 0.000116387 | 1.865073313  | 2.098559635 | 1.808022762  | 0.571602171  | midline crossing |
| ENSDART00000139454 | pde4cb            | 0.055423595 | 0.616688899  | 0.67005432  | 0.986689732  | 0.473877974  | midline crossing |
| ENSDART00000139479 | slc12a9           | 0.004483567 | 0.435405363  | 0.483188456 | 0.53485188   | 0.300178427  | midline crossing |
| ENSDART00000139722 | dmtn              | 2.54845E-05 | 1.105433633  | 1.577455563 | 1.872515003  | 1.217364091  | midline crossing |
| ENSDART00000139763 | stat5a            | 0.018355029 | 3.442434617  | 3.964844196 | 3.417693165  | 3.322184683  | midline crossing |
| ENSDART00000139892 | elfn2a            | 0.064943452 | 0.520234542  | 0.439147218 | 0.642970325  | 0.553931258  | midline crossing |
| ENSDART00000139947 | rapgef1a          | 0.043449081 | 0.201307435  | 0.3482683   | 0.17911742   | 0.096155984  | midline crossing |
| ENSDART00000140032 | si:dkeyp-69c1.9   | 0.086002228 | 1.662700986  | 3.288206015 | 1.780235269  | 1.584891446  | midline crossing |
| ENSDART00000140153 | mri1              | 0.000415146 | 1.105039291  | 1.085223643 | 1.409079861  | 0.961058569  | midline crossing |
| ENSDART00000140253 | arhgef10lb        | 0.006717057 | 0.447026855  | 0.470705895 | 0.502550702  | 0.280062014  | midline crossing |
| ENSDART00000140490 | MFAP4 (1 of many) | 0.010636065 | 1.29105804   | 2.228445007 | 1.795046858  | 1.318796638  | midline crossing |
| ENSDART00000140537 | dhrs11a           | 0.010679495 | 0.251388963  | 0.647205288 | 0.714640117  | 0.4437028    | midline crossing |
| ENSDART00000140736 | si:dkey-42i9.6    | 0.00486688  | 0.573524661  | 0.712949488 | 0.985257189  | 0.193370375  | midline crossing |
| ENSDART00000141068 | sox11b            | 8.488E-05   | 1.611838536  | 2.177304965 | 2.010624009  | 1.194765222  | midline crossing |
| ENSDART00000141107 | cd99              | 0.005438298 | 2.277092862  | 3.207492883 | 2.696592348  | 2.108764519  | midline crossing |
| ENSDART00000141173 | elavl4            | 0.000104621 | 2.4638469    | 2.569363943 | 2.090923257  | 1.273250901  | midline crossing |
| ENSDART00000141328 | pip5k1            | 0.027686308 | 0.719167688  | 0.681103792 | 0.759572826  | 0.613914474  | midline crossing |
| ENSDART00000141382 | rab34b            | 0.005807113 | 1.020539104  | 1.398669915 | 1.148932644  | 0.356641036  | midline crossing |
| ENSDART00000141385 | si:dkey-27p18.3   | 0.023714388 | 0.644114707  | 0.569712036 | 1.095314507  | 0.257528776  | midline crossing |
| ENSDART00000141578 | shmt1             | 0.002456687 | 2.367581981  | 4.511004025 | 4.354684857  | -7.25195E-16 | midline crossing |
| ENSDART00000141606 | commd8            | 0.007621679 | 0.496320125  | 0.646713153 | 0.422272129  | 0.302789387  | midline crossing |
| ENSDART00000141625 | si:ch211-156p11.1 | 0.075460344 | 0.900660828  | 1.143855847 | 0.822477469  | 0.791150698  | midline crossing |
| ENSDART00000141837 | esd               | 0.031729112 | 0.782720008  | 0.801148933 | 0.794217077  | 0.347191174  | midline crossing |
| ENSDART00000141877 | kcnk10a           | 0.000157775 | 1.57307368   | 1.979146889 | 1.661354893  | 0.924431526  | midline crossing |
| ENSDART00000142146 | dmtn              | 0.027138478 | 0.637268571  | 0.800533621 | 0.832554824  | 0.713529971  | midline crossing |
| ENSDART00000142356 | smyd2a            | 0.012342358 | 2.425657932  | 2.779397529 | 2.178998127  | 1.672270997  | midline crossing |
| ENSDART00000142428 | josd2             | 0.004387455 | 0.235661569  | 0.659033561 | 0.722639048  | 0.359420457  | midline crossing |
| ENSDART00000142569 | specc11b          | 0.004391006 | 0.378697075  | 0.547073638 | 0.617855803  | 0.275260653  | midline crossing |
| ENSDART00000142692 | eef1b2            | 0.008579097 | 0.349947783  | 0.50162657  | 0.39446346   | 0.093426844  | midline crossing |
| ENSDART00000142873 | BX901918.1        | 0.068563448 | 0.845880305  | 0.530715844 | 1.008998061  | 0.591786557  | midline crossing |
| ENSDART00000143056 | zyx               | 0.011047999 | 0.416244119  | 0.475600395 | 0.593066786  | 0.15882784   | midline crossing |
| ENSDART00000143457 | cndp2             | 0.016866534 | 0.393197537  | 0.458029638 | 0.473219597  | 0.244423454  | midline crossing |
| ENSDART00000143562 | gbbp2             | 0.021682969 | 0.680404258  | 0.927169543 | 1.353668195  | 0.527828388  | midline crossing |
| ENSDART00000143723 | idi1              | 0.030676359 | 0.080932725  | 0.304370095 | 0.372374682  | 0.127047939  | midline crossing |
| ENSDART00000143741 | fkbp5             | 2.85018E-05 | 1.764298053  | 1.865156046 | 1.631976013  | 1.871443577  | midline crossing |
| ENSDART00000143793 | C3 (1 of many)    | 0.009758715 | 3.237329668  | 4.023510735 | 3.503827488  | 2.024562274  | midline crossing |
| ENSDART00000144503 | ran               | 0.011399481 | -0.075551405 | 0.448221073 | 0.249018928  | 0.118064827  | midline crossing |
| ENSDART00000144516 | lonrf1            | 0.001677265 | 0.003516441  | 0.629397595 | -0.101368349 | 0.117101343  | midline crossing |
| ENSDART00000144814 | si:dkey-31f5.8    | 0.019331363 | 0.429768416  | 1.027388779 | 0.82502917   | 0.369456203  | midline crossing |
| ENSDART00000144817 | cf1               | 0.008723451 | 0.341949415  | 0.252829572 | 0.49073898   | 0.258667203  | midline crossing |
| ENSDART00000144946 | adcypap1b         | 0.016974377 | 2.385755846  | 2.421463563 | 2.507590258  | 1.873754889  | midline crossing |
| ENSDART00000145095 | celsr3            | 0.003711093 | 0.648145926  | 0.648607509 | 0.829081729  | 0.619308918  | midline crossing |
| ENSDART00000145103 | cntfr             | 0.071222712 | 0.307964555  | 0.391102809 | 0.626651223  | 0.264745691  | midline crossing |
| ENSDART00000145379 | fbli1             | 0.003095428 | 0.305913455  | 0.545649791 | 0.383397127  | 0.135782412  | midline crossing |
| ENSDART00000145956 | ptpn23a           | 0.029718853 | 0.252886396  | 0.192353563 | 0.35477406   | 0.187678789  | midline crossing |
| ENSDART00000145999 | prx               | 0.022530244 | 1.586883428  | 3.204392125 | 2.633047079  | 1.399238803  | midline crossing |
| ENSDART00000146005 | gtbbp1            | 0.02305104  | 0.461505187  | 0.53679144  | 0.551879705  | 0.330029037  | midline crossing |
| ENSDART00000146411 | sst6              | 0.000370918 | 0.736642137  | 1.700467827 | 1.549366173  | 1.261691667  | midline crossing |
| ENSDART00000146434 | zgc:153115        | 0.001249772 | 0.499570303  | 0.817313835 | 0.902072926  | 0.441195032  | midline crossing |
| ENSDART00000146611 | cxc3.3            | 0.009119552 | 0.415816929  | 0.611232638 | 0.663522207  | -0.008061564 | midline crossing |
| ENSDART00000146744 | nfkbiab           | 0.003196539 | 0.787570548  | 0.783257317 | 0.468593447  | 0.633863732  | midline crossing |
| ENSDART00000147019 | si:ch211-235o23.1 | 0.001130346 | 0.394717538  | 0.700152429 | 0.448882118  | 0.273599764  | midline crossing |
| ENSDART00000147264 | fam213b           | 0.046818285 | 0.418860252  | 0.552271711 | 0.440362956  | 0.212029386  | midline crossing |
| ENSDART00000147518 | fam89b            | 0.007332698 | 0.288965136  | 0.576511697 | 0.598868415  | 0.448283091  | midline crossing |
| ENSDART00000147821 | spsb4a            | 0.001871569 | 0.371275002  | 0.33311003  | 0.599280348  | 0.314031744  | midline crossing |
| ENSDART00000147849 | klf6a             | 0.000870446 | 1.130982604  | 1.870693821 | 1.403514717  | 0.445060502  | midline crossing |
| ENSDART00000147851 | eef1b2            | 0.000349374 | 0.252066551  | 0.849118612 | 0.755935234  | 0.422914839  | midline crossing |
| ENSDART00000148011 | cbp1              | 0.052184053 | 0.256002046  | 0.39067073  | 0.214338805  | 0.125714094  | midline crossing |
| ENSDART00000148138 | lrrc8aa           | 0.002977128 | 0.370743632  | 0.558987897 | 0.552524282  | 0.096775057  | midline crossing |
| ENSDART00000148154 | stx2a             | 0.012799526 | 0.73746977   | 1.316523952 | 0.880682553  | 0.300142462  | midline crossing |
| ENSDART00000148163 | frmd4bb           | 0.000286897 | 0.943172358  | 1.400649402 | 1.507648518  | 0.548522517  | midline crossing |
| ENSDART00000148388 | smox              | 0.001452556 | 1.14663E-15  | 4.65884204  | 4.212605499  | 2.256263175  | midline crossing |
| ENSDART00000148432 | ptp4a3            | 0.003196078 | 0.27125556   | 0.468426427 | 0.608500351  | -0.013500628 | midline crossing |
| ENSDART00000148601 | insig1            | 0.008603534 | -0.03765091  | 0.839125818 | 0.622258944  | 0.165134159  | midline crossing |
| ENSDART00000148659 | clip2             | 0.000391808 | 0.500760868  | 0.904821279 | 1.156870185  | 0.693646301  | midline crossing |
| ENSDART00000148822 | adgrg1            | 0.015695496 | 0.746405238  | 1.031170771 | 0.764826924  | 0.143644812  | midline crossing |
| ENSDART00000148993 | hdac6             | 0.033606114 | 0.150136767  | 0.327518494 | 0.405976253  | 0.20477563   | midline crossing |
| ENSDART00000149074 | sall1b            | 2.18017E-05 | 1.974229239  | 2.883794957 | 2.506155499  | 1.735121972  | midline crossing |
| ENSDART00000149115 | zgc:158659        | 4.64273E-06 | 1.901261478  | 2.561373529 | 3.048076346  | 2.366410956  | midline crossing |
| ENSDART00000149320 | arl8a             | 0.011240617 | 0.200543842  | 0.321313695 | 0.387648659  | 0.1981557    | midline crossing |

|                    |                       |             |             |             |             |              |                  |
|--------------------|-----------------------|-------------|-------------|-------------|-------------|--------------|------------------|
| ENSDART00000149910 | abl1                  | 0.034395507 | 0.087815124 | 0.252042838 | 0.385819934 | 0.051793038  | midline crossing |
| ENSDART00000149978 | fabp7a                | 0.000717715 | 0.33770709  | 0.764013846 | 0.558825405 | 0.488886506  | midline crossing |
| ENSDART00000150013 | cd276                 | 1.1419E-05  | 1.481977913 | 1.919249755 | 1.718653495 | 0.833090259  | midline crossing |
| ENSDART00000150149 | tdp1                  | 0.042010311 | 0.245251359 | 0.536780821 | 0.276916415 | 0.174119987  | midline crossing |
| ENSDART00000150391 | si:ch211-214j24.14    | 0.000870998 | 2.502222784 | 2.698584631 | 2.367333489 | 0.935046128  | midline crossing |
| ENSDART00000150651 | BX465862.4            | 0.011605032 | 0.896323656 | 0.956165673 | 0.709439713 | 0.378868912  | midline crossing |
| ENSDART00000150692 | NA                    | 0.001955129 | 0.448027135 | 0.604850915 | 0.68748119  | 0.482541087  | midline crossing |
| ENSDART00000150961 | wdr91                 | 0.030491542 | 4.358324282 | 4.633846856 | 4.480446443 | 4.649897846  | midline crossing |
| ENSDART00000151247 | scn1lab               | 0.035957782 | 0.293159534 | 0.684635422 | 0.628869811 | 0.299982725  | midline crossing |
| ENSDART00000151448 | vamp4                 | 0.002952724 | 0.36274105  | 0.703182259 | 0.708668654 | 0.04883985   | midline crossing |
| ENSDART00000151613 | lhfp12a               | 0.025409101 | 2.211015019 | 2.8976425   | 2.404140419 | 1.864383361  | midline crossing |
| ENSDART00000151679 | si:ch73-233k15.2      | 0.008447718 | 0.305634484 | 0.260016753 | 1.072404438 | -0.272816623 | midline crossing |
| ENSDART00000151785 | k1c4                  | 0.002952432 | 0.265672724 | 0.701188452 | 0.757625768 | 0.469102543  | midline crossing |
| ENSDART00000151892 | BX248324.2            | 9.23128E-05 | 1.389473856 | 2.137590244 | 1.979774015 | 1.113747327  | midline crossing |
| ENSDART00000151999 | ttc27                 | 0.000370918 | 0.537657382 | 0.63628465  | 0.751878141 | 0.471568333  | midline crossing |
| ENSDART00000152240 | si:ch1073-174d20.2    | 0.045564466 | 0.11047675  | 0.254355415 | 0.357239942 | 0.147146143  | midline crossing |
| ENSDART00000152295 | FAM83G                | 0.016063659 | 1.150380037 | 1.206829236 | 1.079415548 | 0.591155843  | midline crossing |
| ENSDART00000152318 | si:ch211-286b5.2      | 0.002663982 | 1.976393579 | 3.213645724 | 2.557166791 | 1.560923939  | midline crossing |
| ENSDART00000152510 | ccser2b               | 0.001067718 | 0.726161978 | 0.836833026 | 1.118702985 | 0.610749876  | midline crossing |
| ENSDART00000152562 | EIF3F                 | 0.018854609 | 0.257721359 | 0.386526337 | 0.235538886 | 0.038968621  | midline crossing |
| ENSDART00000152641 | dnm3a                 | 0.000272902 | 1.808565272 | 2.497351665 | 2.011092537 | 0.57584064   | midline crossing |
| ENSDART00000152680 | pyyb                  | 0.000396404 | 2.62463081  | 4.023644413 | 3.815932945 | 2.663962921  | midline crossing |
| ENSDART00000152855 | prdx1                 | 0.045741098 | 2.014399342 | 2.912277881 | 2.532639813 | 2.043057891  | midline crossing |
| ENSDART00000153194 | si:ckey-38p12.3       | 0.015825859 | 0.25264745  | 0.485169484 | 0.572803819 | 0.07332987   | midline crossing |
| ENSDART00000153199 | afap1                 | 0.00834805  | 0.800574953 | 1.106233667 | 1.438882155 | 1.005659187  | midline crossing |
| ENSDART00000153200 | si:ch211-194k22.8     | 0.033503027 | 0.210290351 | 0.451170205 | 0.37501933  | 0.225583201  | midline crossing |
| ENSDART00000153225 | GUCY2C (1 of many)    | 0.032143116 | 3.255008425 | 3.866902647 | 2.201523204 | 2.781639432  | midline crossing |
| ENSDART00000153227 | nfe211b               | 0.013323448 | 0.688085235 | 1.301360444 | 1.138008541 | 0.729999096  | midline crossing |
| ENSDART00000153306 | hcar1-4               | 0.004505979 | 0.883818254 | 1.413387657 | 1.160612678 | 0.305432292  | midline crossing |
| ENSDART00000153307 | si:ch73-344o19.1      | 0.006344596 | 0.586530995 | 0.605191095 | 0.75799445  | 0.479323327  | midline crossing |
| ENSDART00000153452 | hsp90ab1              | 0.030379124 | 0.284157203 | 0.639252574 | 0.548907136 | 0.495783326  | midline crossing |
| ENSDART00000153666 | AL732567.1            | 0.002559269 | 0.845331402 | 1.050170733 | 0.86587331  | 0.828206988  | midline crossing |
| ENSDART00000153841 | lmcd1                 | 0.012070853 | 1.804357101 | 2.873087613 | 2.523453656 | 2.002290777  | midline crossing |
| ENSDART00000154109 | tp53inp2              | 0.001954005 | 0.254956915 | 0.876540848 | 0.694070175 | 0.684041374  | midline crossing |
| ENSDART00000154212 | BX323824.1            | 0.024957938 | 0.386508588 | 0.636151192 | 0.398585293 | 0.423381311  | midline crossing |
| ENSDART00000154314 | prph                  | 6.48692E-06 | 1.502464936 | 3.204214666 | 3.264208069 | 2.453842104  | midline crossing |
| ENSDART00000154321 | BX908750.1            | 0.050473914 | 0.337703917 | 0.710327992 | 0.54373662  | 0.188876538  | midline crossing |
| ENSDART00000154377 | HIST1H2BM (1 of many) | 0.051183892 | 0.871205458 | 1.144896653 | 0.89956001  | 0.544514919  | midline crossing |
| ENSDART00000154543 | prelid3a              | 0.006027331 | 0.578261204 | 0.829307037 | 0.712329147 | 0.291766611  | midline crossing |
| ENSDART00000154573 | prob1                 | 0.001652227 | 1.935993422 | 2.091368151 | 1.752154811 | 1.442205958  | midline crossing |
| ENSDART00000154628 | fam101b               | 0.000888975 | 0.450957894 | 0.982590486 | 0.845377619 | -0.490650185 | midline crossing |
| ENSDART00000154846 | CR381618.1            | 0.002605308 | 0.115176903 | 0.900181702 | 1.102625706 | 0.253393379  | midline crossing |
| ENSDART00000154851 | zgc:153405            | 0.027461561 | 0.317950752 | 1.076463864 | 0.674378682 | 0.394781222  | midline crossing |
| ENSDART00000154880 | arhgef33              | 0.01779887  | 0.636994605 | 0.687196577 | 0.646579762 | 0.300121216  | midline crossing |
| ENSDART00000155051 | mnych                 | 0.002016009 | 1.81452306  | 1.847457308 | 1.423042212 | 0.692601562  | midline crossing |
| ENSDART00000155188 | ccn1j                 | 0.031062271 | 0.284030133 | 0.391162848 | 0.492680219 | 0.242842213  | midline crossing |
| ENSDART00000155256 | VVA5A (1 of many)     | 0.021065097 | 0.207030506 | 0.487713239 | 0.641785484 | 0.122484219  | midline crossing |
| ENSDART00000155280 | GDPGP1                | 0.018409732 | 0.576074599 | 0.656458452 | 0.674683139 | 0.299654628  | midline crossing |
| ENSDART00000155440 | EIF3Ba                | 0.00350062  | 0.265595321 | 0.439061322 | 0.461693724 | 0.229141991  | midline crossing |
| ENSDART00000155537 | VVA5A (1 of many)     | 0.000220872 | 1.206080865 | 0.987004598 | 1.27402251  | 0.722325665  | midline crossing |
| ENSDART00000155751 | nuak1b                | 1.33565E-05 | 0.785416985 | 1.722603254 | 1.683891996 | 1.302083807  | midline crossing |
| ENSDART00000156034 | VVA5A (1 of many)     | 8.51245E-05 | 1.04711946  | 1.090403168 | 1.260861512 | 0.694741705  | midline crossing |
| ENSDART00000156038 | epn2                  | 0.034236293 | 0.165862475 | 0.434471463 | 0.333526121 | 0.113707323  | midline crossing |
| ENSDART00000156167 | si:ch73-182a11.2      | 0.007880813 | 0.438099394 | 0.613388756 | 0.677790276 | 0.474745988  | midline crossing |
| ENSDART00000156224 | dhx33                 | 0.005024347 | 0.472474316 | 0.556602191 | 0.639276654 | 0.492917502  | midline crossing |
| ENSDART00000156251 | ehbp1                 | 0.005375255 | 0.342339175 | 0.353753636 | 0.38894242  | 0.04618254   | midline crossing |
| ENSDART00000156255 | ago1                  | 0.004702472 | 0.402935641 | 0.576022371 | 0.656640241 | 0.478601065  | midline crossing |
| ENSDART00000156411 | fam98a                | 0.014485141 | 0.369288002 | 0.399859986 | 0.477248543 | 0.233728964  | midline crossing |
| ENSDART00000156415 | dock9b                | 0.006352299 | 0.187525252 | 0.556466903 | 0.665071238 | 0.341730571  | midline crossing |
| ENSDART00000156774 | dph6                  | 0.010921357 | 0.485952337 | 0.860504803 | 0.608054536 | 0.313680056  | midline crossing |
| ENSDART00000156913 | BX927184.1            | 0.000109677 | 1.282107066 | 1.77927465  | 1.802027966 | 1.376990986  | midline crossing |
| ENSDART00000156970 | si:ch73-265h17.5      | 0.019558454 | 1.250341969 | 1.481314496 | 1.76830523  | 0.8438116    | midline crossing |
| ENSDART00000156972 | slc12a7a              | 0.016311478 | 0.533547881 | 0.750475895 | 0.543271513 | 0.05077876   | midline crossing |
| ENSDART00000157127 | lmcd1                 | 0.008776907 | 1.160892936 | 2.271204052 | 2.063825472 | 1.282095985  | midline crossing |
| ENSDART00000157139 | tmbim1a               | 0.004528919 | 0.963253296 | 1.499596205 | 1.306783479 | 0.549513539  | midline crossing |
| ENSDART00000157350 | CT573344.1            | 0.023257205 | 0.592860846 | 1.013860007 | 1.275401288 | 0.850112465  | midline crossing |
| ENSDART00000157441 | filip1l               | 0.004552273 | 1.025025125 | 2.361056221 | 1.959563135 | 1.214723721  | midline crossing |
| ENSDART00000157597 | Metazoa_SRP           | 0.000305619 | 3.784983496 | 4.068975573 | 4.489534416 | 3.689887905  | midline crossing |
| ENSDART00000157604 | si:ckey-19c16.12      | 0.067756277 | 0.518457933 | 0.406892634 | 0.690003002 | 0.445775315  | midline crossing |
| ENSDART00000157678 | nop53                 | 0.020688276 | 0.221649253 | 0.357738319 | 0.319808875 | 0.087032288  | midline crossing |
| ENSDART00000157824 | slc6a15               | 0.001558204 | 0.370043272 | 0.932121448 | 1.025205824 | 0.470213629  | midline crossing |
| ENSDART00000157894 | apaf1                 | 0.033808649 | 0.69901776  | 0.613857472 | 0.804406673 | 0.575412751  | midline crossing |
| ENSDART00000157907 | rpl34                 | 0.021862757 | 0.216382556 | 0.50724745  | 0.251806906 | 0.167915072  | midline crossing |
| ENSDART00000158016 | flnca                 | 4.50375E-07 | 5.435651542 | 4.853809922 | 4.737861308 | 3.940836376  | midline crossing |
| ENSDART00000158272 | dcl1b                 | 0.007797716 | 0.134331666 | 0.528656936 | 0.571389243 | 0.299537528  | midline crossing |

|                    |                    |             |              |             |             |              |                  |
|--------------------|--------------------|-------------|--------------|-------------|-------------|--------------|------------------|
| ENSDART00000158739 | Metazoa_SRP        | 0.027491007 | 1.431390172  | 1.797550169 | 1.401344471 | 0.830250287  | midline crossing |
| ENSDART00000158744 | BX927336.3         | 0.000371354 | 4.021248005  | 3.307131569 | 3.405842268 | 3.528289574  | midline crossing |
| ENSDART00000159024 | btr29              | 0.003508363 | 2.93548853   | 3.916483422 | 3.440636421 | 1.361130093  | midline crossing |
| ENSDART00000159034 | rsu1               | 0.003279742 | 0.959727483  | 0.959427671 | 0.950095712 | 0.424675541  | midline crossing |
| ENSDART00000159256 | kif5c              | 0.031850333 | 0.534952361  | 0.603334839 | 0.411520272 | 0.273079865  | midline crossing |
| ENSDART00000159259 | capn1b             | 4.91601E-05 | 0.6323058    | 1.402210713 | 1.384902028 | 1.097440242  | midline crossing |
| ENSDART00000159300 | mcm7               | 0.002876227 | 0.714704002  | 0.831682391 | 0.874291792 | 0.339164006  | midline crossing |
| ENSDART00000159340 | ctnnd1             | 0.000135332 | 0.771872624  | 0.982959313 | 0.944642837 | 0.226155974  | midline crossing |
| ENSDART00000159372 | EIF3ha             | 0.001128218 | 0.499618724  | 0.599836819 | 0.638052337 | 0.263915251  | midline crossing |
| ENSDART00000159652 | sox4b              | 0.008897727 | 0.767109202  | 1.080655119 | 1.389017231 | 0.976257694  | midline crossing |
| ENSDART00000159732 | si:dkey-203a12.8   | 0.050696552 | 3.015691266  | 3.637172924 | 3.104587293 | 1.713663998  | midline crossing |
| ENSDART00000159949 | wdr1               | 0.082310414 | 0.362540326  | 0.308247591 | 0.564916756 | 0.170183845  | midline crossing |
| ENSDART00000159965 | si:ch211-255i3.4   | 0.025487547 | 0.121150704  | 0.407179882 | 0.241107117 | 0.125992518  | midline crossing |
| ENSDART00000160006 | Metazoa_SRP        | 0.001666219 | 1.639017988  | 2.129447988 | 1.830106321 | 0.946987666  | midline crossing |
| ENSDART00000160206 | rap2b              | 0.014591443 | 0.536023906  | 0.628551975 | 0.691733134 | 0.267820563  | midline crossing |
| ENSDART00000160492 | alad               | 0.036567119 | 0.30171604   | 0.443307609 | 0.248348623 | 0.158762163  | midline crossing |
| ENSDART00000160575 | CU459186.1         | 0.043586255 | 0.738311554  | 1.064084865 | 0.743119809 | 0.540430362  | midline crossing |
| ENSDART00000160604 | ftsj3              | 0.00161581  | 0.856590556  | 0.695492085 | 0.825371198 | 0.428239045  | midline crossing |
| ENSDART00000160663 | tnk2b              | 0.032721257 | 0.180874765  | 0.228576581 | 0.365115453 | 0.173216656  | midline crossing |
| ENSDART00000160766 | pim1               | 0.002635727 | 0.465870139  | 0.649909313 | 0.413306503 | 0.082988542  | midline crossing |
| ENSDART00000160799 | jpt1b              | 0.000229447 | 0.682460724  | 1.366219793 | 1.515562314 | 0.876953288  | midline crossing |
| ENSDART00000161017 | EIF3s6ip           | 0.012456084 | 0.313830903  | 0.293421495 | 0.276651786 | 0.120270233  | midline crossing |
| ENSDART00000161117 | NA                 | 0.052467991 | 0.194355392  | 0.331000906 | 0.496659366 | 0.20108058   | midline crossing |
| ENSDART00000161244 | CR293509.1         | 5.17084E-05 | 0.407469749  | 1.465267423 | 1.274347742 | 0.975210426  | midline crossing |
| ENSDART00000161330 | col27a1a           | 0.012339321 | 0.210670367  | 0.547410859 | 0.646435326 | 0.255665234  | midline crossing |
| ENSDART00000161377 | cdk2ap2            | 0.030614624 | 0.241317874  | 0.341753789 | 0.416424679 | 0.144968334  | midline crossing |
| ENSDART00000161460 | pmt                | 0.047763341 | 2.538801298  | 3.7270331   | 2.780124527 | 1.870914111  | midline crossing |
| ENSDART00000161514 | CABZ01079986.1     | 0.000250511 | -0.184749182 | 1.474076268 | 0.73277167  | -0.443845367 | midline crossing |
| ENSDART00000161597 | si:ch211-262i1.3   | 0.034395507 | 0.726810222  | 0.918966234 | 1.284521547 | 0.120004192  | midline crossing |
| ENSDART00000161613 | SLC7A1 (1 of many) | 0.002341037 | 0.777752401  | 1.137604367 | 0.924750387 | 0.450737498  | midline crossing |
| ENSDART00000161869 | dysf               | 0.010359104 | 1.077492273  | 1.30463907  | 1.440346007 | 1.017975966  | midline crossing |
| ENSDART00000162007 | Metazoa_SRP        | 0.037519793 | 0.903949119  | 2.303055473 | 1.702580761 | 0.513671528  | midline crossing |
| ENSDART00000162377 | FP085414.1         | 0.001772851 | 0.809712454  | 1.275862162 | 1.389373351 | 0.791945088  | midline crossing |
| ENSDART00000162722 | zgc:153867         | 0.001130434 | 0.467799327  | 0.468299246 | 0.579069745 | 0.022677056  | midline crossing |
| ENSDART00000162897 | Metazoa_SRP        | 0.0215019   | 1.178659737  | 1.5924133   | 1.384383775 | 1.197556527  | midline crossing |
| ENSDART00000163042 | si:dkey-16p6.2     | 0.048041075 | 0.705211119  | 0.592959463 | 0.681550899 | 0.554585181  | midline crossing |
| ENSDART00000163137 | elov1a             | 0.000445792 | 1.359201374  | 2.32562135  | 1.99000125  | 0.940099891  | midline crossing |
| ENSDART00000163174 | si:ch73-42p12.2    | 6.34429E-05 | 0.635401366  | 0.972834844 | 0.669544171 | 0.150769788  | midline crossing |
| ENSDART00000163243 | dpys14             | 0.001058776 | 0.526851432  | 0.969802663 | 1.139409914 | 0.808513895  | midline crossing |
| ENSDART00000163367 | TFR2               | 4.96098E-05 | 0.892525381  | 1.842645951 | 2.060867557 | 1.063290775  | midline crossing |
| ENSDART00000163770 | si:rp71-36a1.2     | 0.007804676 | 0.777729217  | 1.232972386 | 1.065047677 | 0.579071639  | midline crossing |
| ENSDART00000163441 | limk1a             | 6.80867E-05 | 1.134897491  | 0.940120128 | 1.036684953 | 0.715200814  | midline crossing |
| ENSDART00000164207 | impdh2             | 0.000279675 | 0.582365155  | 0.675083436 | 1.006708284 | 0.417204588  | midline crossing |
| ENSDART00000164210 | SI                 | 0.000224957 | 1.002064064  | 1.522108486 | 0.992417222 | 0.446482404  | midline crossing |
| ENSDART00000164311 | mfsd2aa            | 0.007723957 | 0.188250738  | 0.92622451  | 1.277563791 | 0.357720797  | midline crossing |
| ENSDART00000164392 | lrrc20             | 0.000250511 | 0.934799406  | 1.852088866 | 1.534338919 | 1.07983234   | midline crossing |
| ENSDART00000164471 | CABZ01084230.2     | 0.024883139 | 0.442580477  | 0.587031258 | 0.401618345 | 0.289449509  | midline crossing |
| ENSDART00000164543 | kalrna             | 0.002635555 | 0.833553496  | 1.079150473 | 0.963779963 | 0.661385395  | midline crossing |
| ENSDART00000165141 | elav14             | 0.004826213 | 1.008784658  | 0.753903544 | 1.037731482 | 0.21557706   | midline crossing |
| ENSDART00000165309 | pmt                | 0.000144061 | 1.560743592  | 2.051643174 | 1.965781873 | 1.006007351  | midline crossing |
| ENSDART00000165572 | zgc:162193         | 0.029001753 | 0.654407013  | 0.606984165 | 0.583589232 | 0.369009896  | midline crossing |
| ENSDART00000165594 | CT030188.1         | 0.030766044 | 0.949647945  | 1.541943795 | 1.047931527 | 0.898450066  | midline crossing |
| ENSDART00000165628 | il4r.1             | 0.026868362 | 2.521820035  | 2.797213431 | 2.312532052 | 1.674117298  | midline crossing |
| ENSDART00000165715 | BX284638.1         | 0.000261206 | 0.544886732  | 0.81514457  | 1.035521411 | 0.49952411   | midline crossing |
| ENSDART00000165993 | f3a                | 0.000100528 | 1.175718098  | 1.946056838 | 1.259834727 | 0.15077318   | midline crossing |
| ENSDART00000166040 | sh3bp5b            | 5.24617E-05 | 0.359354612  | 1.105816025 | 1.101214783 | 0.69319763   | midline crossing |
| ENSDART00000166120 | si:ch211-212d10.1  | 0.005272363 | 1.398436882  | 1.472487792 | 1.228480368 | 0.254562361  | midline crossing |
| ENSDART00000166259 | wars               | 0.007387753 | 0.30804143   | 0.479087994 | 0.526413933 | 0.245904587  | midline crossing |
| ENSDART00000166324 | ctnnd1             | 0.02267327  | 0.460487451  | 0.641759187 | 1.004918197 | 0.346719852  | midline crossing |
| ENSDART00000166432 | slc2a8             | 0.044776229 | 0.33290564   | 0.367124099 | 0.471066456 | 0.250147846  | midline crossing |
| ENSDART00000166560 | hpd1               | 0.029524772 | 0.319918962  | 0.542121436 | 0.616518616 | 0.488982996  | midline crossing |
| ENSDART00000166622 | si:dkey-77g12.1    | 0.030464157 | 1.256692313  | 2.663525112 | 1.501030031 | -0.081810387 | midline crossing |
| ENSDART00000166992 | rab6a              | 0.003458178 | 0.863374482  | 0.610837796 | 0.548836905 | 0.594870039  | midline crossing |
| ENSDART00000167035 | mibp2              | 0.000190025 | 0.52185156   | 0.897496666 | 1.068299106 | 0.608631566  | midline crossing |
| ENSDART00000167062 | SNORD49            | 0.030270278 | 0.825973685  | 1.057295844 | 0.696610061 | 0.75374548   | midline crossing |
| ENSDART00000167145 | ap1ar              | 0.00427909  | 0.285895558  | 0.368048827 | 0.350688731 | 0.119518374  | midline crossing |
| ENSDART00000167359 | dusp27             | 0.000892328 | 1.665789827  | 1.31173846  | 1.624125812 | 1.13571557   | midline crossing |
| ENSDART00000167461 | BX897691.1         | 0.046057741 | 1.652413387  | 2.158428192 | 1.996842668 | 1.949150718  | midline crossing |
| ENSDART00000167666 | dnajc21            | 0.014542918 | 0.569585132  | 0.384796247 | 0.537599141 | 0.160116436  | midline crossing |
| ENSDART00000167879 | Metazoa_SRP        | 0.015884799 | 3.268404605  | 5.790076    | 5.563915837 | 5.137733652  | midline crossing |
| ENSDART00000168083 | Metazoa_SRP        | 0.018792355 | 1.497191597  | 1.645034783 | 1.435853831 | 0.615781715  | midline crossing |
| ENSDART00000168371 | mibp               | 0.004889638 | 1.064831288  | 1.384792727 | 1.720455753 | 0.84273718   | midline crossing |
| ENSDART00000168376 | Metazoa_SRP        | 0.031983637 | 0.77672172   | 1.175457852 | 1.304833035 | 1.047872554  | midline crossing |
| ENSDART00000168419 | rsu1               | 0.004815134 | 0.608707901  | 0.588635147 | 0.668370486 | 0.283061431  | midline crossing |
| ENSDART00000168497 | eef2b              | 0.002633576 | 0.448731314  | 0.547292163 | 0.7539331   | 0.364287935  | midline crossing |

|                     |                   |             |              |             |             |             |                  |
|---------------------|-------------------|-------------|--------------|-------------|-------------|-------------|------------------|
| ENSDART00000168610  | si:ch211-283g2.2  | 0.000871179 | 1.147251625  | 1.274539863 | 1.168500693 | 0.162307024 | midline crossing |
| ENSDART00000168683  | lrrc8c            | 0.039756837 | 0.403272924  | 0.771214032 | 0.877257507 | 0.389191376 | midline crossing |
| ENSDART00000168902  | Metazoa_SRP       | 0.060788884 | 0.908254207  | 1.60749636  | 1.079432418 | 0.706761496 | midline crossing |
| ENSDART00000169023  | scn1lab           | 0.043676774 | 0.230826198  | 0.448869227 | 0.411715364 | 0.200031153 | midline crossing |
| ENSDART00000169052  | elov1b            | 0.016102005 | 0.945814486  | 1.07228669  | 0.819418014 | 0.365575121 | midline crossing |
| ENSDART00000169061  | CU138533.1        | 0.004085991 | 0.641184794  | 1.068185172 | 1.17226183  | 0.773255864 | midline crossing |
| ENSDART00000169663  | CT573860.1        | 0.009406102 | 0.353646224  | 0.562802664 | 0.454063437 | 0.329757181 | midline crossing |
| ENSDART00000170095  | CR388166.2        | 0.047568271 | 0.588171845  | 0.299671021 | 0.452688856 | 0.506464888 | midline crossing |
| ENSDART00000170116  | uap1              | 0.041037763 | 0.399345456  | 0.560025587 | 0.455223073 | 0.418274301 | midline crossing |
| ENSDART00000170222  | mibp              | 0.046085697 | 1.202449519  | 1.249757535 | 1.712700336 | 0.61416841  | midline crossing |
| ENSDART00000170284  | creb3l3l          | 0.064177665 | 0.444489468  | 0.957040221 | 0.49606022  | 0.414651857 | midline crossing |
| ENSDART00000170374  | si:dkey-38l22.2   | 5.17084E-05 | 1.50589782   | 1.851640662 | 1.322719067 | 0.692201779 | midline crossing |
| ENSDART00000170422  | si:dkey-19b23.8   | 0.000292971 | 0.497209105  | 1.26444289  | 1.061660184 | 0.502612026 | midline crossing |
| ENSDART00000170572  | lepa              | 0.00013528  | 4.559547685  | 4.778234325 | 4.366752593 | 2.765663683 | midline crossing |
| ENSDART00000170589  | mibp              | 0.028456497 | 1.067201928  | 1.476075399 | 1.501871782 | 0.758874349 | midline crossing |
| ENSDART00000170671  | megf8             | 0.003012872 | 0.369502187  | 0.913401505 | 1.13324158  | 0.463058503 | midline crossing |
| ENSDART00000170684  | btf3              | 0.027344176 | 0.217794169  | 0.784907824 | 0.656975875 | 0.357635511 | midline crossing |
| ENSDART00000170768  | lect1             | 0.055604098 | 3.805179034  | 4.274135568 | 2.696697623 | 2.532825072 | midline crossing |
| ENSDART00000170865  | nme2b.1           | 0.007383951 | 0.635993303  | 0.679448572 | 0.689008761 | 0.355584206 | midline crossing |
| ENSDART00000170983  | lmbn2             | 0.03397627  | 0.185291183  | 0.299339057 | 0.275121803 | 0.118770566 | midline crossing |
| ENSDART00000171113  | mibp              | 0.0245375   | 1.815496184  | 1.851942075 | 2.237510566 | 0.882565569 | midline crossing |
| ENSDART00000171235  | calua             | 0.003825103 | 0.528206357  | 0.591046444 | 0.528298198 | 0.210887316 | midline crossing |
| ENSDART00000171343  | FP102192.1        | 0.009511897 | 1.130120264  | 0.697435719 | 1.760333984 | 0.139610385 | midline crossing |
| ENSDART00000171380  | top1mt            | 0.004985516 | 0.983277478  | 1.316957074 | 1.074308725 | 0.32139594  | midline crossing |
| ENSDART00000171589  | hrasa             | 0.008728551 | 0.543862541  | 0.913653251 | 0.982614467 | 0.767663706 | midline crossing |
| ENSDART00000171867  | fnbp1l            | 0.000996442 | 0.402488238  | 0.925028089 | 0.937640279 | 0.578874881 | midline crossing |
| ENSDART00000171882  | CAB201088567.1    | 0.0066372   | 0.407931     | 0.822027708 | 0.621405649 | 0.24977578  | midline crossing |
| ENSDART00000171996  | myl12.1           | 0.017201684 | 0.233861142  | 0.344330245 | 0.260508491 | 0.06338781  | midline crossing |
| ENSDART00000172215  | si:ch211-39i2.2   | 1.36144E-05 | 1.017534105  | 1.848603057 | 1.465869245 | 0.571196451 | midline crossing |
| ENSDART00000172372  | Metazoa_SRP       | 0.027491007 | 1.431390172  | 1.797550169 | 1.401344471 | 0.830250287 | midline crossing |
| ENSDART00000172441  | lima1a            | 0.014437179 | 0.350368785  | 0.588496789 | 0.46589541  | 0.178939257 | midline crossing |
| ENSDART00000172510  | elavl4            | 0.002554999 | 1.054519465  | 1.174247457 | 1.078840874 | 0.691066079 | midline crossing |
| ENSDART00000173098  | gemin6            | 0.046727574 | 0.181263356  | 0.385271136 | 0.184325919 | 0.274013326 | midline crossing |
| ENSDART00000173195  | zgc:153146        | 0.033291702 | 2.291177749  | 2.913913042 | 2.827467346 | 2.606942928 | midline crossing |
| ENSDART00000173305  | si:ch1073-456m8.1 | 0.012253248 | 0.206580067  | 0.587987288 | 0.667691948 | 0.271613596 | midline crossing |
| ENSDART00000173436  | si:dkey-280e21.3  | 8.39504E-05 | 0.740189589  | 1.373516231 | 1.387529232 | 0.976737711 | midline crossing |
| ENSDART00000000486  | cntn2             | 6.48692E-06 | 0.15280519   | 0.733067848 | 1.819345027 | 1.713832915 | target selection |
| ENSDART000000002393 | rundc3aa          | 0.000184957 | -0.355283185 | 0.971542583 | 1.209230568 | 0.944629469 | target selection |
| ENSDART000000002961 | rcor2             | 0.001353924 | -0.353333584 | 0.726682254 | 0.762799057 | 0.664353552 | target selection |
| ENSDART000000003745 | vim               | 0.015014385 | 0.110317427  | 0.81438402  | 0.975636783 | 0.646819018 | target selection |
| ENSDART000000003998 | ewsr1b            | 0.006990173 | 0.136063726  | 0.084077199 | 0.439371598 | 0.241694854 | target selection |
| ENSDART000000004622 | sf3b4             | 0.02954888  | 0.222493415  | 0.286225027 | 0.527062646 | 0.243398323 | target selection |
| ENSDART000000005337 | rimka             | 0.001648434 | -0.133054455 | 0.30447461  | 0.568720788 | 0.413212633 | target selection |
| ENSDART000000005366 | tpd5l2b           | 0.046265136 | 0.128420316  | 0.410964244 | 0.59220548  | 0.186138167 | target selection |
| ENSDART000000005453 | chd4a             | 0.006932921 | 0.299643374  | 0.423708585 | 0.655765013 | 0.391160008 | target selection |
| ENSDART000000005496 | kctd9b            | 0.010839093 | 0.161429839  | 0.406047159 | 0.541753399 | 0.319048316 | target selection |
| ENSDART000000005609 | kifap3a           | 0.003425348 | 0.203573738  | 0.628570592 | 0.743430197 | 0.605809471 | target selection |
| ENSDART000000005720 | sta1a             | 0.010250585 | 0.035880276  | 0.045195542 | 0.615137639 | 0.020671748 | target selection |
| ENSDART000000006085 | cbi               | 0.034881046 | 0.165119386  | 0.1775588   | 0.379174787 | 0.206196339 | target selection |
| ENSDART000000006489 | acsl4a            | 0.000400742 | 0.116872844  | 1.158097412 | 1.477099844 | 0.59458295  | target selection |
| ENSDART000000006724 | smarcd3b          | 0.00033575  | -0.214336649 | 0.06424201  | 0.499562006 | 0.504466248 | target selection |
| ENSDART000000006778 | acat2             | 0.003807479 | -0.122422954 | 0.489045334 | 0.688039864 | 0.280940334 | target selection |
| ENSDART000000008038 | sulf2a            | 1.1419E-05  | 0.420520728  | 1.274767381 | 2.360438199 | 2.491815243 | target selection |
| ENSDART000000009194 | aimp2             | 0.028420674 | 0.035867833  | 0.204745928 | 0.516008081 | 0.307277143 | target selection |
| ENSDART000000009277 | tuba1a            | 0.000180202 | 0.466164103  | 1.394077049 | 1.773814961 | 1.31379942  | target selection |
| ENSDART000000010140 | igf2bp3           | 0.01196819  | 0.357904839  | 0.436869624 | 1.38352682  | 1.118120985 | target selection |
| ENSDART000000010144 | pvalb2            | 0.002147221 | 0.379417352  | 4.690875982 | 5.447468716 | 3.629116223 | target selection |
| ENSDART000000010274 | dpysl5a           | 0.000114847 | 0.119382655  | 1.052869734 | 1.414498731 | 1.230769727 | target selection |
| ENSDART000000010495 | znrf1             | 0.011135896 | 0.045008698  | 0.17288769  | 0.379569247 | 0.252907322 | target selection |
| ENSDART000000011224 | itga10            | 0.008920935 | 2.439207816  | 3.888845597 | 4.302533523 | 3.055176776 | target selection |
| ENSDART000000011568 | syng3a            | 0.003678598 | -0.064295047 | 0.234968681 | 0.63147157  | 0.633880469 | target selection |
| ENSDART000000011865 | sec23b            | 0.002343787 | -0.409405473 | 0.102005828 | 0.534469651 | 0.138588714 | target selection |
| ENSDART000000012247 | dhcr24            | 0.030292962 | 2.392110544  | 2.697063662 | 3.119814675 | 2.653468904 | target selection |
| ENSDART000000012256 | tnni2a.3          | 0.004454925 | 0.628164776  | 3.762159614 | 4.672246791 | 3.241031276 | target selection |
| ENSDART000000013605 | zbtb20            | 0.00075553  | 0.201191929  | 0.070670156 | 0.462529396 | 0.345025042 | target selection |
| ENSDART000000013785 | insig1            | 0.003330818 | -0.148803263 | 0.843708665 | 1.082868772 | 0.366540247 | target selection |
| ENSDART000000013961 | mycla             | 0.015752787 | 0.091841991  | 0.503579515 | 0.855574629 | 0.294011787 | target selection |
| ENSDART000000014806 | npas2             | 0.005305184 | -0.341343772 | 0.009000257 | 0.555800516 | 0.156695025 | target selection |
| ENSDART000000014922 | arhgap22          | 0.004853289 | 0.337853511  | 0.496203573 | 0.771443869 | 0.664153347 | target selection |
| ENSDART000000015040 | hrasb             | 0.001609185 | -0.035400047 | 0.468215746 | 0.71708775  | 0.509094476 | target selection |
| ENSDART000000015286 | ankrd13b          | 0.001076713 | -0.294042347 | 0.149598935 | 0.484140903 | 0.605167909 | target selection |
| ENSDART000000015632 | nkain1            | 0.000894529 | 0.21220236   | 0.815235139 | 1.176280245 | 0.965286214 | target selection |
| ENSDART000000015979 | farsb             | 0.041085489 | 0.087018819  | 0.265294461 | 0.405710239 | 0.211888538 | target selection |
| ENSDART000000016303 | irx2a             | 4.96098E-05 | -0.381386746 | 0.064410059 | 0.752093904 | 0.989751717 | target selection |
| ENSDART000000016360 | si:ch73-199e17.1  | 0.028708281 | 2.690029092  | 3.363503415 | 3.69470671  | 3.529091333 | target selection |

|                    |                   |             |              |              |             |              |                  |
|--------------------|-------------------|-------------|--------------|--------------|-------------|--------------|------------------|
| ENSDART00000016370 | dir2              | 0.000512152 | 0.134905484  | 0.442850685  | 0.565287267 | 0.464631841  | target selection |
| ENSDART00000016597 | nfbkiab           | 0.038559823 | 0.207474067  | 0.316720279  | 0.269395099 | 0.411969915  | target selection |
| ENSDART00000016710 | scrn3             | 0.001328724 | -0.247629441 | -0.171036354 | 0.44401532  | -0.052873668 | target selection |
| ENSDART00000016860 | ppp2r1bb          | 0.015469128 | 0.018499942  | 0.284521267  | 0.321334616 | 0.193996267  | target selection |
| ENSDART00000017299 | tdg.1             | 0.043370331 | 0.102853523  | 0.194463285  | 0.348171907 | 0.196594799  | target selection |
| ENSDART00000018150 | neurod6b          | 0.012342358 | 0.484226112  | 1.695956927  | 1.935318885 | 1.555476315  | target selection |
| ENSDART00000018498 | helz2             | 0.00076674  | -0.063748361 | -0.192163226 | 1.151139617 | 0.013207133  | target selection |
| ENSDART00000018735 | dnaja2l           | 0.000177237 | -0.20745831  | 0.012628814  | 0.350147509 | 0.311991137  | target selection |
| ENSDART00000019045 | ebp               | 0.003165422 | -0.186359255 | 0.947675675  | 1.363611199 | 0.55228711   | target selection |
| ENSDART00000019199 | rab39ba           | 0.013286981 | -0.125963686 | 0.3041991    | 0.44382958  | 0.206562916  | target selection |
| ENSDART00000019617 | rsad2             | 0.008246433 | -0.056061565 | -0.489318095 | 2.739834278 | -0.378754222 | target selection |
| ENSDART00000019658 | nacad             | 8.67551E-05 | -0.254606168 | 0.44010123   | 0.744298293 | 0.29398429   | target selection |
| ENSDART00000019925 | GNB4              | 0.000718633 | 0.24039241   | 0.43881347   | 0.966289057 | 1.074168682  | target selection |
| ENSDART00000020122 | ywhah             | 0.000166651 | -0.243048068 | -0.041853394 | 0.44002204  | 0.422069749  | target selection |
| ENSDART00000020621 | mapk4             | 0.001185711 | -0.137443479 | 0.345820304  | 0.800085717 | 0.474998646  | target selection |
| ENSDART00000020970 | pgm2              | 0.021002038 | 0.182379442  | 0.224260514  | 0.427220163 | 0.369397058  | target selection |
| ENSDART00000021341 | kif3ca            | 0.001627738 | 0.175248246  | 0.488322423  | 0.730937873 | 0.492487971  | target selection |
| ENSDART00000021693 | ank2a             | 0.031838485 | 0.088061869  | 0.283890991  | 0.488712819 | 0.41975176   | target selection |
| ENSDART00000022270 | arhgap33          | 0.034698678 | 0.060975731  | 0.144058893  | 0.360327899 | 0.271763038  | target selection |
| ENSDART00000022909 | klhl18            | 0.00115719  | -0.153412936 | 0.073357396  | 0.397749012 | 0.249762723  | target selection |
| ENSDART00000023278 | fads2             | 0.00304733  | -0.280275959 | 0.609167416  | 1.126645574 | 0.472069511  | target selection |
| ENSDART00000023944 | lmnl3             | 0.001714837 | -0.134674249 | 0.538751787  | 0.920098245 | 0.528719758  | target selection |
| ENSDART00000023959 | arntl1a           | 7.43514E-05 | 0.340904931  | 1.030627189  | 1.45255612  | 0.975945139  | target selection |
| ENSDART00000024135 | tubb2             | 7.10385E-05 | -0.097026879 | 1.085064176  | 1.27895467  | 1.027950073  | target selection |
| ENSDART00000025852 | tnni2b.1          | 0.000911246 | -0.577234038 | 4.833238121  | 5.215670785 | 3.899605393  | target selection |
| ENSDART00000026800 | kifap3b           | 0.001775429 | 0.203180282  | 0.588115089  | 0.640508934 | 0.450843691  | target selection |
| ENSDART00000026992 | sox4a             | 3.6604E-05  | 0.168735758  | 0.553498244  | 0.871364123 | 0.630648218  | target selection |
| ENSDART00000027158 | psmd3             | 0.034155477 | 0.079773681  | 0.202742016  | 0.46801517  | 0.212038089  | target selection |
| ENSDART00000027379 | bicral            | 0.012896166 | 0.180958951  | 0.201052129  | 0.429766407 | 0.252075745  | target selection |
| ENSDART00000027598 | tpm3              | 0.022054847 | 0.692886998  | 2.316316343  | 2.715886041 | 1.570432549  | target selection |
| ENSDART00000027718 | fxr2              | 0.020107844 | 0.070260526  | 0.251047986  | 0.370057736 | 0.114198992  | target selection |
| ENSDART00000027758 | rtn1b             | 0.000135341 | -0.626628578 | 0.207141964  | 0.617559397 | 0.433726227  | target selection |
| ENSDART00000028607 | chd6              | 0.008909863 | 0.00488027   | -0.079639497 | 0.533277243 | 0.378096362  | target selection |
| ENSDART00000029121 | usp5              | 0.005099354 | 0.186533139  | 0.264124698  | 0.696851044 | 0.548402162  | target selection |
| ENSDART00000031470 | pafah1b1b         | 0.001868725 | -0.06625793  | 0.19164974   | 0.422888398 | 0.388967525  | target selection |
| ENSDART00000033724 | fabp3             | 0.001967837 | 0.043357927  | 0.829727862  | 0.980692721 | 0.446444515  | target selection |
| ENSDART00000034216 | dync1h1           | 0.038721816 | 0.15631552   | 0.099035755  | 0.755817679 | 0.554910929  | target selection |
| ENSDART00000034914 | pvalb3            | 0.006583055 | -0.375270417 | 3.922610155  | 4.415489459 | 3.238850832  | target selection |
| ENSDART00000035245 | spire2            | 9.16648E-05 | 0.223570717  | 0.667119992  | 0.874236758 | 0.626613708  | target selection |
| ENSDART00000035409 | zc2hc1a           | 0.000588633 | 0.100393521  | 0.424633369  | 0.532716266 | 0.492034687  | target selection |
| ENSDART00000036926 | vangl1            | 0.000398071 | -0.329590873 | -0.033233324 | 0.383553313 | 0.3451937    | target selection |
| ENSDART00000038391 | pkz               | 0.008061109 | 0.411244814  | 0.129537507  | 1.595328762 | 0.021626224  | target selection |
| ENSDART00000040557 | CRIP2 (1 of many) | 0.000349374 | -0.132882678 | 0.562285777  | 0.768710088 | 0.441120913  | target selection |
| ENSDART00000042134 | dock7             | 0.014840867 | 0.063646619  | 0.209946461  | 0.48316367  | 0.274325565  | target selection |
| ENSDART00000042162 | tm7sf2            | 0.008621509 | 0.1050645    | 0.758038931  | 0.952561873 | 0.4137868    | target selection |
| ENSDART00000042218 | pafah1b1a         | 0.024122965 | 0.049322983  | 0.127134272  | 0.313096774 | 0.220746894  | target selection |
| ENSDART00000042255 | rab6bb            | 0.000105127 | 0.249992007  | 1.135776594  | 1.498200114 | 1.307756366  | target selection |
| ENSDART00000043932 | atp2a1            | 0.046659681 | 1.138744452  | 4.285725335  | 5.558096993 | 3.994336477  | target selection |
| ENSDART00000044000 | plxna3            | 0.000326965 | 0.522678231  | 0.518528602  | 0.862237135 | 0.748340859  | target selection |
| ENSDART00000044057 | 43346             | 0.00053559  | -0.17670354  | 0.196164293  | 0.478730018 | 0.43476862   | target selection |
| ENSDART00000044453 | ano5a             | 0.00350062  | -0.027551778 | 0.223592536  | 0.548330121 | 0.427829524  | target selection |
| ENSDART00000044949 | syt16             | 4.96098E-05 | -0.001457693 | -0.053066568 | 0.72824965  | 0.634879457  | target selection |
| ENSDART00000045391 | srgap2            | 0.005041829 | 0.042169336  | 0.118632088  | 0.377794988 | 0.307955564  | target selection |
| ENSDART00000045410 | thy1              | 8.488E-05   | 0.906274294  | 2.922050483  | 2.917431913 | 2.440516966  | target selection |
| ENSDART00000046678 | pak2b             | 0.02432669  | 0.067537468  | 0.265866932  | 0.367938524 | 0.197303091  | target selection |
| ENSDART00000046933 | sult1st5          | 0.009503355 | 0.218426293  | 0.869949792  | 0.854237199 | 0.702293309  | target selection |
| ENSDART00000047082 | gdap1l1           | 0.00058454  | -0.237605119 | 0.285676986  | 0.669438597 | 0.59731396   | target selection |
| ENSDART00000047143 | specc1            | 0.039415449 | 0.250947915  | 0.397558549  | 0.627196335 | 0.309975843  | target selection |
| ENSDART00000047409 | myh14             | 0.014779327 | 0.151853201  | 0.372826224  | 0.643058289 | 0.555183408  | target selection |
| ENSDART00000048110 | six4b             | 0.002795018 | 0.757934328  | 2.322346312  | 2.776043581 | 1.88012445   | target selection |
| ENSDART00000049194 | gpr37b            | 2.18017E-05 | -0.562015213 | 0.012994785  | 0.671207906 | 0.757619967  | target selection |
| ENSDART00000051231 | gnb2              | 0.002814147 | -0.235263329 | 0.124417594  | 0.575032632 | 0.495502612  | target selection |
| ENSDART00000051234 | tnika             | 0.001841908 | 0.106489865  | 0.189584243  | 0.309030435 | 0.511149463  | target selection |
| ENSDART00000051697 | evia              | 0.003779087 | -0.055749697 | 0.354222037  | 0.437976697 | 0.322467243  | target selection |
| ENSDART00000052124 | fam49al           | 0.000100528 | -0.409057809 | -0.177161374 | 0.563238983 | 0.47605027   | target selection |
| ENSDART00000052511 | hnrnpa0l          | 0.02613431  | 0.098563881  | 0.214926285  | 0.391405743 | 0.211573162  | target selection |
| ENSDART00000053284 | bcl9              | 0.003126045 | -0.057531558 | 0.216352129  | 0.432379429 | 0.260365529  | target selection |
| ENSDART00000053869 | slc44a2           | 0.000322013 | 0.03477078   | 0.96666703   | 1.3453814   | 0.899279007  | target selection |
| ENSDART00000054664 | tnnc1b            | 0.019014873 | -0.083935925 | 3.176389417  | 3.430200861 | 1.884280525  | target selection |
| ENSDART00000054691 | uba1              | 0.014095383 | 0.10035699   | 0.287144805  | 0.420196482 | 0.237625478  | target selection |
| ENSDART00000055340 | fus               | 0.000159901 | -0.011490396 | 0.383733399  | 0.662780299 | 0.416441518  | target selection |
| ENSDART00000055380 | tubb5             | 2.92142E-06 | 2.169554793  | 3.899556169  | 4.316772272 | 3.57490014   | target selection |
| ENSDART00000055756 | tbc1d12a          | 0.00448854  | -0.033893992 | 0.095679716  | 0.342628218 | 0.232107662  | target selection |
| ENSDART00000056286 | h1f0              | 0.001739475 | -0.326358805 | 0.273543898  | 0.626230484 | 0.593578182  | target selection |
| ENSDART00000056544 | tox4a             | 0.02114031  | 0.131870382  | 0.296259606  | 0.350040714 | 0.249645538  | target selection |

|                    |                   |             |              |              |             |              |                  |
|--------------------|-------------------|-------------|--------------|--------------|-------------|--------------|------------------|
| ENSDART00000056795 | hectd3            | 0.004611386 | 0.187585997  | 0.34309988   | 0.435708832 | 0.360997812  | target selection |
| ENSDART00000057584 | slc1a4            | 0.00134801  | 0.291595567  | 1.233259249  | 1.405286425 | 1.089173123  | target selection |
| ENSDART00000058574 | NA                | 0.032955534 | 3.231975259  | 2.942133944  | 3.360676782 | 3.717330017  | target selection |
| ENSDART00000059586 | spegb             | 4.52852E-05 | 0.60633626   | 1.046592342  | 1.773590673 | 1.534849845  | target selection |
| ENSDART00000059756 | ralba             | 0.014582204 | 0.050810042  | 0.323679093  | 0.529596851 | 0.259207353  | target selection |
| ENSDART00000060561 | csdc2a            | 0.006063577 | -0.084744858 | 0.609682067  | 0.574951056 | 0.285883083  | target selection |
| ENSDART00000060766 | rab11a            | 0.001380734 | 0.179968247  | 0.479437298  | 0.674000894 | 0.468733557  | target selection |
| ENSDART00000061417 | si:ch211-245h14.1 | 0.00918017  | 0.537591116  | 0.459433616  | 1.387404638 | -0.014689392 | target selection |
| ENSDART00000061470 | mtss1a            | 0.002100653 | -0.34228031  | 0.053961203  | 0.113929451 | 0.018495568  | target selection |
| ENSDART00000061523 | il17a/f3          | 0.017627165 | 0.228114616  | 0.421937628  | 0.621201213 | 0.769032572  | target selection |
| ENSDART00000061955 | myl13             | 0.006605056 | 0.400602979  | 3.991209963  | 4.290518336 | 2.830575983  | target selection |
| ENSDART00000062551 | cyp51             | 0.0002611   | 0.018772193  | 0.850105191  | 1.080881624 | 0.554137375  | target selection |
| ENSDART00000062650 | zgc:77784         | 0.054165556 | 0.130172136  | 0.171187774  | 0.614861949 | 0.368542156  | target selection |
| ENSDART00000063938 | mast1a            | 0.000314801 | 0.148358744  | 0.555318149  | 1.032634027 | 1.008672267  | target selection |
| ENSDART00000065097 | dpysl3            | 0.000311162 | -0.247117182 | 0.32883927   | 0.696704704 | 0.442557487  | target selection |
| ENSDART00000065600 | sc5d              | 0.009204947 | -0.12560715  | 0.619273704  | 0.802648489 | 0.437253012  | target selection |
| ENSDART00000066177 | tuba2             | 7.26748E-05 | -0.341980556 | 0.290211936  | 0.695639518 | 0.704284087  | target selection |
| ENSDART00000066391 | csnk1e            | 0.000593122 | 0.01172114   | 0.595315231  | 0.792117229 | 0.433182971  | target selection |
| ENSDART00000066975 | impdh1b           | 0.000512556 | 0.195914466  | 0.339716801  | 0.56808711  | 0.477613078  | target selection |
| ENSDART00000067066 | parp6b            | 1.45694E-05 | -0.443166413 | 0.101161009  | 0.402103535 | 0.516387314  | target selection |
| ENSDART00000067327 | abhd2b            | 0.0021138   | 0.195640353  | 0.698443956  | 0.611964225 | 0.750739323  | target selection |
| ENSDART00000073583 | islr2             | 0.000634488 | 0.313523936  | 1.12325114   | 1.332162091 | 1.179316934  | target selection |
| ENSDART00000074924 | mbnl1             | 0.094159425 | 0.32889023   | 0.277718787  | 0.642145523 | 0.211541009  | target selection |
| ENSDART00000074979 | rnf2              | 0.02083117  | 0.06664962   | 0.449659345  | 0.588779493 | 0.279626887  | target selection |
| ENSDART00000075112 | clvs2             | 0.003104562 | 0.165980729  | 0.346379383  | 0.75563827  | 0.535875063  | target selection |
| ENSDART00000075260 | inab              | 2.82217E-05 | -0.558694355 | 0.275313434  | 1.165237079 | 1.111612471  | target selection |
| ENSDART00000075331 | insm1b            | 0.009480138 | 0.180818368  | 0.558805202  | 0.852549514 | 0.856981121  | target selection |
| ENSDART00000075743 | eprs              | 0.03427447  | 0.181617497  | 0.208060281  | 0.357036503 | 0.248273691  | target selection |
| ENSDART00000075808 | apbb3             | 0.002539213 | -0.025817957 | 0.161567226  | 0.465828121 | 0.45985711   | target selection |
| ENSDART00000075902 | klhl43            | 0.004256148 | 1.602362948  | 3.319039146  | 3.627754288 | 3.174379945  | target selection |
| ENSDART00000076506 | wisp1a            | 0.025227573 | 0.075916017  | 0.908100257  | 1.435223818 | 0.542654062  | target selection |
| ENSDART00000076574 | rtn1a             | 0.00434437  | -0.132166015 | 0.374408359  | 0.606191338 | 0.476970779  | target selection |
| ENSDART00000077215 | ppp2r5b           | 0.002524433 | 0.185911454  | 0.229029828  | 0.615811771 | 0.611674376  | target selection |
| ENSDART00000077459 | smyd2a            | 0.042433381 | 0.109333535  | 0.326579335  | 0.423001533 | 0.365696401  | target selection |
| ENSDART00000077539 | tuba1c            | 0.00109551  | -0.211130957 | 0.180769664  | 0.840172721 | 0.834422327  | target selection |
| ENSDART00000078137 | ankrd54           | 0.034178169 | 0.051281727  | 0.23783078   | 0.382868701 | 0.32135773   | target selection |
| ENSDART00000078277 | msmo1             | 0.001153812 | -0.087631699 | 1.109674669  | 1.47165822  | 0.852850391  | target selection |
| ENSDART00000078334 | celsr3            | 0.002605308 | 0.469496099  | 0.512562938  | 0.74195357  | 0.599858827  | target selection |
| ENSDART00000078771 | SBK1              | 0.00198437  | -0.390774004 | 0.13684565   | 0.923517231 | 0.784697628  | target selection |
| ENSDART00000079235 | cd99i2            | 0.000613723 | -0.167082345 | 0.448795434  | 0.91020128  | 0.864265064  | target selection |
| ENSDART00000079283 | tmeff1b           | 0.001133915 | 0.060962109  | 0.679659218  | 0.971148806 | 0.712213835  | target selection |
| ENSDART00000079559 | ifit16            | 0.0332616   | 0.716638095  | 0.325468397  | 2.311988055 | -0.283531995 | target selection |
| ENSDART00000079711 | slc25a1a          | 0.000122706 | 0.025053389  | 0.916416559  | 1.283110285 | 0.925187833  | target selection |
| ENSDART00000079778 | ifit8             | 0.035967167 | 1.432186723  | 0.097505141  | 4.166007884 | 0.96250098   | target selection |
| ENSDART00000080033 | SSBP2 (1 of many) | 0.034092146 | 0.123939988  | 0.461173497  | 0.600467157 | 0.3572706    | target selection |
| ENSDART00000080042 | rab33a            | 0.001631005 | -0.045588719 | 0.341497657  | 0.630733663 | 0.503197845  | target selection |
| ENSDART00000080256 | nefma             | 1.75467E-05 | 0.572074143  | 2.009260502  | 2.281701505 | 1.529767044  | target selection |
| ENSDART00000080289 | prrc2c            | 0.035944076 | 0.060093623  | 0.047472332  | 0.306363857 | 0.189281148  | target selection |
| ENSDART00000080602 | map7d2b           | 0.001304993 | 0.243598476  | 0.831190471  | 1.239754477 | 0.898189276  | target selection |
| ENSDART00000081059 | rps6kb1b          | 0.042381041 | 0.156747941  | 0.167680861  | 0.344534054 | 0.174989656  | target selection |
| ENSDART00000081092 | si:dkeyp-77h1.4   | 0.000199258 | -0.383994825 | 0.24121529   | 0.967657356 | 0.94823494   | target selection |
| ENSDART00000081223 | krt5              | 0.004002952 | 2.400508858  | 4.729984226  | 4.862312842 | 5.813921541  | target selection |
| ENSDART00000081272 | gcn1              | 0.02181186  | 0.168820856  | 0.100284898  | 0.363305756 | 0.2232516    | target selection |
| ENSDART00000081601 | cept1a            | 0.020882958 | 0.150762086  | 0.296977372  | 0.445683893 | 0.275050142  | target selection |
| ENSDART00000082944 | dock6             | 0.004360669 | 0.129469289  | 0.283374744  | 0.379764071 | 0.290753034  | target selection |
| ENSDART00000083002 | map1aa            | 0.00881795  | 0.023824463  | 0.057494175  | 0.8302085   | 0.470304447  | target selection |
| ENSDART00000083212 | fscn1a            | 0.001033408 | -0.172521555 | 0.403697769  | 0.865067524 | 0.635846942  | target selection |
| ENSDART00000083605 | tbcd25            | 0.020097848 | 0.094218097  | 0.226970926  | 0.332123969 | 0.140604089  | target selection |
| ENSDART00000083628 | ddit3             | 0.002192622 | -0.053032847 | 0.505000026  | 0.598711637 | 0.25299651   | target selection |
| ENSDART00000083797 | TBC1D9B           | 0.000642503 | 0.273448063  | 0.469124554  | 0.581828184 | 0.40676136   | target selection |
| ENSDART00000084819 | arhgap35b         | 0.001659006 | 0.101645005  | 0.291379647  | 0.535032879 | 0.462050203  | target selection |
| ENSDART00000085230 | at11              | 0.003020568 | -0.283512177 | 0.138626411  | 0.619353197 | 0.442930265  | target selection |
| ENSDART00000085263 | SELENOI           | 0.02776376  | 0.036305982  | 0.149651758  | 0.460720877 | 0.164646013  | target selection |
| ENSDART00000085319 | sos2              | 0.038217845 | 0.062155314  | 0.173737983  | 0.464042198 | 0.208637802  | target selection |
| ENSDART00000085388 | bmp3              | 0.004205562 | -0.146774305 | 1.240822845  | 1.494378971 | 0.416428855  | target selection |
| ENSDART00000085453 | cluhb             | 5.72005E-05 | -0.484145834 | -0.430773206 | 0.678836708 | -0.017745757 | target selection |
| ENSDART00000085684 | ttll11            | 0.000375747 | -0.16810055  | 0.020727161  | 0.348458395 | 0.408691778  | target selection |
| ENSDART00000085719 | si:ch211-10a23.2  | 0.001067718 | 0.141906082  | 0.927202925  | 1.15606105  | 0.59243708   | target selection |
| ENSDART00000086301 | irge4             | 0.015651339 | 0.875091617  | 0.681146857  | 1.737500297 | 0.803175592  | target selection |
| ENSDART00000086333 | jarid2a           | 0.000531966 | -0.109318405 | 0.11175985   | 0.373609719 | 0.35216542   | target selection |
| ENSDART00000086409 | dync1i1           | 0.002016009 | -0.021724393 | 0.427961112  | 0.551451734 | 0.438467635  | target selection |
| ENSDART00000086434 | tmcc2             | 0.000793313 | 0.022092982  | 0.338134833  | 0.850580716 | 0.840264518  | target selection |
| ENSDART00000086537 | NA                | 0.022370255 | 0.422133332  | 0.379254853  | 0.651471983 | 0.472158305  | target selection |
| ENSDART00000086946 | mov10b.1          | 0.016426365 | 0.41644893   | 0.305142124  | 1.89370555  | 0.04709269   | target selection |
| ENSDART00000087105 | myom2a            | 0.029772573 | 2.177324505  | 3.608086766  | 3.587707417 | 2.779461648  | target selection |

|                   |                      |             |               |              |              |              |                  |
|-------------------|----------------------|-------------|---------------|--------------|--------------|--------------|------------------|
| ENSDART0000087107 | eif4g1a              | 0.01673556  | 0.252655247   | -0.051267066 | 0.413833734  | 0.330964133  | target selection |
| ENSDART0000087115 | rims1b               | 0.002016009 | -0.155072254  | 0.041830315  | 0.378907446  | 0.287621284  | target selection |
| ENSDART0000087204 | dusp3a               | 0.000778506 | -0.327203373  | -0.053264752 | 0.592884224  | 0.622404395  | target selection |
| ENSDART0000088364 | kif1aa               | 0.000306344 | -0.06544832   | 0.34113245   | 0.707853532  | 0.648494399  | target selection |
| ENSDART0000088653 | prss12               | 0.001247242 | -0.641371677  | 0.068962263  | 0.215098805  | 0.069158882  | target selection |
| ENSDART0000089076 | dot1l                | 0.009173096 | 0.094529933   | 0.165735937  | 0.448240264  | 0.463978672  | target selection |
| ENSDART0000089079 | mpnd                 | 0.001644836 | 0.049906779   | 0.784892334  | 0.951903848  | 0.691834891  | target selection |
| ENSDART0000089141 | fsd1                 | 0.000907455 | 0.140911421   | 0.537063785  | 0.66216846   | 0.489473142  | target selection |
| ENSDART0000089445 | agap1                | 0.028468759 | 0.111728293   | 0.12652166   | 0.321279752  | 0.223152778  | target selection |
| ENSDART0000090596 | fgf12b               | 0.000227894 | -0.346267349  | -0.034488788 | 0.704892235  | 0.660670447  | target selection |
| ENSDART0000090748 | pcdh1g9              | 0.004897476 | 0.151679401   | 0.129768355  | 0.681696549  | 0.559518569  | target selection |
| ENSDART0000090874 | kcnh7                | 0.000589961 | 0.089634054   | 0.066677874  | 0.800119794  | 0.739010611  | target selection |
| ENSDART0000091241 | si:ch73-22o12.1      | 0.003818266 | -0.053659471  | 0.086463787  | 0.414689493  | 0.463272551  | target selection |
| ENSDART0000091644 | abi1b                | 0.016742251 | 0.181595456   | 0.359192672  | 0.565695572  | 0.32038751   | target selection |
| ENSDART0000092270 | r3hdm4               | 0.003016249 | 0.109330042   | 0.341009284  | 0.430965659  | 0.322117566  | target selection |
| ENSDART0000092690 | sreb2                | 0.003411856 | -0.007030288  | 0.441941306  | 0.773565631  | 0.436893785  | target selection |
| ENSDART0000092948 | pel1b                | 0.025378177 | 0.088983174   | 0.130189996  | 0.342697853  | 0.254903056  | target selection |
| ENSDART0000098057 | ftr19                | 0.021658197 | 0.135898929   | 0.299355243  | 0.876453981  | -0.013001669 | target selection |
| ENSDART0000098284 | ftr14                | 0.009877168 | 0.428599203   | 0.304151818  | 1.741077228  | -0.09285898  | target selection |
| ENSDART0000099977 | mex3c                | 0.051405603 | 0.161233198   | 0.169039948  | 0.509657606  | 0.094152947  | target selection |
| ENSDART0000100310 | dbn1                 | 0.015825859 | 0.014767176   | 0.221674025  | 0.550020524  | 0.324902581  | target selection |
| ENSDART0000100332 | fgf12b               | 0.00038813  | -0.220479512  | 0.029676005  | 0.518232207  | 0.657400596  | target selection |
| ENSDART0000100619 | zgc:158803           | 0.028599369 | 0.343521186   | 0.388812734  | 0.518620429  | 0.45576524   | target selection |
| ENSDART0000101038 | tmie                 | 0.000195011 | 0.304653896   | 1.158765103  | 1.299122704  | 1.103412502  | target selection |
| ENSDART0000101282 | bcr                  | 0.005519422 | 0.172989029   | 0.500540591  | 0.708792261  | 0.385177654  | target selection |
| ENSDART0000101537 | mex3b                | 0.000847723 | -0.20648165   | 0.480244705  | 0.713185315  | 0.514833911  | target selection |
| ENSDART0000101789 | flot2b               | 0.000781013 | 0.047673595   | 0.464453756  | 0.590584487  | 0.461504068  | target selection |
| ENSDART0000102011 | G3BP2 (1 of many)    | 0.015925333 | 0.183053703   | 0.292940696  | 0.414353657  | 0.391197687  | target selection |
| ENSDART0000102212 | tdp2a                | 0.010054985 | 1.019634105   | 0.831370615  | 2.830207945  | 0.310574015  | target selection |
| ENSDART0000102305 | cspg5a               | 9.03292E-05 | -0.238742988  | 0.181941504  | 0.751580581  | 0.677972326  | target selection |
| ENSDART0000102384 | sesn2                | 0.029981898 | 0.221656214   | 0.707312613  | 0.831938385  | 0.650662976  | target selection |
| ENSDART0000102520 | palm1a               | 0.000475692 | 0.447081887   | 0.96607967   | 1.214937327  | 0.924772733  | target selection |
| ENSDART0000102539 | st8sia5              | 0.002696406 | 0.153973405   | 0.592846857  | 1.061043515  | 0.777183018  | target selection |
| ENSDART0000102665 | aste1a               | 0.002793888 | 0.478587949   | 0.328068557  | 2.324198666  | 0.218780766  | target selection |
| ENSDART0000102712 | tgm2a                | 0.024073602 | 0.064390317   | 0.421175856  | 0.197637738  | 0.730671181  | target selection |
| ENSDART0000102715 | tuba8l3              | 0.000489924 | 1.032352614   | 1.505768874  | 1.918452626  | 1.697934809  | target selection |
| ENSDART0000102868 | etnk2                | 0.002660549 | -0.119773861  | 0.158574082  | 0.41890552   | 0.249052751  | target selection |
| ENSDART0000103588 | mxa                  | 0.022415732 | 0.174383297   | -0.012993595 | 1.447594397  | 0.019311963  | target selection |
| ENSDART0000103622 | irf7                 | 0.002828188 | -0.049332142  | -0.2878598   | 1.533925917  | -0.275107455 | target selection |
| ENSDART0000103815 | stmn2a               | 4.96098E-05 | 0.140137036   | 1.176009379  | 1.538144395  | 1.355356024  | target selection |
| ENSDART0000103922 | atat1                | 0.015462868 | 0.154026536   | 0.665460259  | 0.937418253  | 0.683690675  | target selection |
| ENSDART0000104299 | cnp                  | 1.98934E-05 | 0.814960421   | 1.713687269  | 2.20652149   | 1.77606709   | target selection |
| ENSDART0000104336 | tnnc2                | 0.0274914   | 0.703924131   | 2.455705453  | 2.232729877  | 1.561721699  | target selection |
| ENSDART0000104478 | fxr1                 | 0.013415803 | 0.018053797   | 0.098113697  | 0.3777704225 | 0.105513892  | target selection |
| ENSDART0000104523 | arntl1b              | 0.000255127 | -0.1198144123 | 0.59291526   | 1.113237486  | 0.52944604   | target selection |
| ENSDART0000104720 | si:ch1073-385f13.3   | 0.037756042 | 0.258133799   | 0.237616235  | 1.745458762  | -0.119672944 | target selection |
| ENSDART0000104730 | ifit14               | 0.018324408 | 0.457651023   | 0.403391968  | 2.518119653  | 0.537556431  | target selection |
| ENSDART0000105405 | cirbpb               | 0.023596757 | 0.001082658   | 0.185977938  | 0.46521688   | -0.018730312 | target selection |
| ENSDART0000105694 | adprm                | 0.001249299 | 0.302167589   | 0.521514455  | 0.908630272  | 0.271324554  | target selection |
| ENSDART0000105873 | cry4                 | 0.001698814 | -0.404336974  | 0.122755184  | 0.671823255  | 0.515326773  | target selection |
| ENSDART0000106120 | ywhag2               | 0.014767815 | 0.097311782   | 0.334968358  | 0.584303472  | 0.612363287  | target selection |
| ENSDART0000108796 | stox2b               | 0.00058454  | 0.143615187   | 0.758742406  | 1.120462456  | 0.794663921  | target selection |
| ENSDART0000109288 | myo16                | 0.003478587 | 0.115485168   | 0.089369719  | 0.360073499  | 0.534996054  | target selection |
| ENSDART0000109615 | tmem255a             | 0.000634043 | 0.198392818   | 0.721353886  | 0.92551731   | 0.71998369   | target selection |
| ENSDART0000109750 | rap2aa               | 0.015651953 | 0.293487605   | 0.482823125  | 0.662590656  | 0.396980886  | target selection |
| ENSDART0000109973 | tp53bp1              | 0.000154883 | 0.061139928   | 0.539512942  | 0.657824217  | 0.222950524  | target selection |
| ENSDART0000110512 | ybx1                 | 0.014352201 | 0.187678935   | 0.306636132  | 0.543417204  | 0.157462635  | target selection |
| ENSDART0000110696 | mxh                  | 0.001413354 | -0.714840475  | -2.62990329  | 3.629462021  | -0.04990443  | target selection |
| ENSDART0000110964 | bag6                 | 0.014908663 | 0.132774646   | 0.150367292  | 0.354477336  | 0.199439987  | target selection |
| ENSDART0000110994 | sqlea                | 0.000140513 | 0.510664466   | 1.875874264  | 2.415595993  | 1.866281513  | target selection |
| ENSDART0000111278 | srcs2                | 0.000322759 | -0.061568527  | 0.240045859  | 0.726875042  | 0.744539967  | target selection |
| ENSDART0000111303 | rxf7                 | 0.00161581  | 0.075232989   | 0.085195342  | 0.459783838  | 0.727409902  | target selection |
| ENSDART0000111454 | UBA6                 | 0.018326914 | -0.095626975  | 0.120665542  | 0.496662318  | 0.328619297  | target selection |
| ENSDART0000111475 | pcdh7a               | 0.008009641 | 0.109274008   | 0.268985487  | 0.465377244  | 0.354118271  | target selection |
| ENSDART0000111480 | bcor1l               | 0.017081311 | 0.013917394   | 0.173170994  | 0.344992278  | 0.232054818  | target selection |
| ENSDART0000111561 | zmp:0000000735       | 0.000689533 | 0.220285812   | 0.110420777  | 1.549961519  | 0.06406158   | target selection |
| ENSDART0000111641 | morn4                | 0.00308528  | 0.104472779   | 0.38320597   | 0.615725038  | 0.556227667  | target selection |
| ENSDART0000111671 | mri1                 | 0.001380734 | 0.203264298   | 0.870246845  | 1.443034807  | 1.04475049   | target selection |
| ENSDART0000111748 | pcdhb                | 0.000529346 | 0.051557806   | 0.39162054   | 0.85552916   | 0.748922663  | target selection |
| ENSDART0000112032 | ARHGAP22 (1 of many) | 0.001967837 | 0.396989069   | 0.894459004  | 1.264783984  | 1.011214691  | target selection |
| ENSDART0000112075 | NA                   | 0.034693937 | 0.743523521   | 0.909798042  | 1.147105824  | 0.978802209  | target selection |
| ENSDART0000112312 | lrch2                | 0.015854118 | 0.101952948   | 0.206054969  | 0.497048672  | 0.404162087  | target selection |
| ENSDART0000112313 | wdr43                | 0.033970998 | 2.967338106   | 2.621161906  | 3.405726008  | 2.58425126   | target selection |
| ENSDART0000112438 | si:ch73-335m24.5     | 0.002769129 | -0.12977304   | -0.024649938 | 0.356284768  | 0.481799029  | target selection |
| ENSDART0000112460 | dolk                 | 0.02235203  | 0.234400054   | 0.274257795  | 0.504999751  | 0.504335897  | target selection |



|                    |                      |             |              |              |             |              |                  |
|--------------------|----------------------|-------------|--------------|--------------|-------------|--------------|------------------|
| ENSDART00000112598 | otud4                | 0.006973136 | 0.000834797  | 0.118841749  | 0.673957038 | 0.019221004  | target selection |
| ENSDART00000112694 | fam171a2b            | 0.001676296 | -0.001835186 | 0.12088862   | 0.541529951 | 0.657778888  | target selection |
| ENSDART00000112728 | tmem175              | 0.004215641 | -0.092618029 | 0.36107371   | 0.426939782 | 0.221686367  | target selection |
| ENSDART00000112883 | fmnl2b               | 0.000169466 | -0.095811604 | 0.162122972  | 0.557976718 | 0.595265469  | target selection |
| ENSDART00000113087 | hmx1                 | 0.000694227 | -0.389387565 | 0.021377927  | 0.234018679 | 0.270888749  | target selection |
| ENSDART00000113097 | hsd17b7              | 0.001028061 | -0.488876774 | 0.314769091  | 0.517151777 | 0.148788215  | target selection |
| ENSDART00000113418 | igsf3                | 0.023363274 | 0.097020516  | 0.19405944   | 0.607620623 | 0.491282072  | target selection |
| ENSDART00000114919 | si:dkey-85k7.12      | 0.012263789 | 0.382806755  | -0.226494664 | 2.101494432 | -0.132340955 | target selection |
| ENSDART00000115023 | PARG                 | 0.014732696 | 0.013352577  | 0.067569536  | 0.312910159 | 0.18617429   | target selection |
| ENSDART00000121837 | efs                  | 0.000534872 | 0.29165502   | 0.378275961  | 0.750399498 | 0.505660243  | target selection |
| ENSDART00000121981 | smarce1              | 0.04263061  | 0.060968412  | 0.140256121  | 0.341840216 | 0.044607056  | target selection |
| ENSDART00000121984 | ssbp3b               | 0.013312578 | -0.092095029 | 0.005321722  | 0.831022729 | 0.629434393  | target selection |
| ENSDART00000122133 | mkrn2os.1            | 0.028489994 | 0.117189294  | 0.106487037  | 0.442579902 | 0.198380082  | target selection |
| ENSDART00000122170 | smc5                 | 0.003077552 | 0.002327719  | -0.01045929  | 0.55091638  | 0.063311494  | target selection |
| ENSDART00000122681 | CR848841.1           | 0.000177237 | 0.726082565  | 1.593466942  | 1.807590182 | 1.450515621  | target selection |
| ENSDART00000122700 | tenm3                | 0.01323139  | 0.157516404  | 0.267363723  | 0.981020214 | 1.113087141  | target selection |
| ENSDART00000122742 | rorcb                | 0.000390105 | -0.773981248 | 0.298893511  | 0.803866913 | 0.643975269  | target selection |
| ENSDART00000122803 | usp9                 | 0.023717938 | 0.139967851  | 0.094990222  | 0.369664537 | 0.232490119  | target selection |
| ENSDART00000122889 | myh2.1.3             | 0.011565935 | 0.065159767  | 3.686062072  | 4.139837605 | 2.765333679  | target selection |
| ENSDART00000122891 | tmem97               | 0.01179775  | 0.209697033  | 0.237651064  | 0.43725776  | 0.414256644  | target selection |
| ENSDART00000122924 | CAB201089151.1       | 0.020552635 | 0.166835416  | 0.574150269  | 1.297855118 | 0.40982894   | target selection |
| ENSDART00000123063 | fgf18a               | 0.006439631 | 0.96370642   | 0.632761225  | 0.668396752 | 0.413800422  | target selection |
| ENSDART00000123136 | FP236812.4           | 0.090688964 | 0.346817394  | 0.374427758  | 0.928731714 | 0.426600457  | target selection |
| ENSDART00000123338 | kif3a                | 0.021156666 | 0.128582487  | 0.488909245  | 0.490973182 | 0.361344362  | target selection |
| ENSDART00000123518 | tuba1b               | 0.00416486  | 0.343846477  | 0.74266829   | 1.086564506 | 0.883480954  | target selection |
| ENSDART00000123590 | si:ch211-91p5.3      | 0.006291033 | 0.174508046  | -0.021173312 | 0.906803099 | -0.35666968  | target selection |
| ENSDART00000123607 | cyfip2               | 0.009681558 | 0.234079405  | 0.294840867  | 0.917405124 | 0.783474958  | target selection |
| ENSDART00000123648 | pcdh1a3              | 6.48692E-06 | -0.182322903 | 0.28663259   | 1.138716215 | 1.048655391  | target selection |
| ENSDART00000124040 | insm1a               | 1.45694E-05 | 0.50962443   | 1.551047216  | 1.738068624 | 1.104992333  | target selection |
| ENSDART00000124085 | usp18                | 0.007028791 | 0.058285571  | 0.001224867  | 0.967078356 | -0.263223461 | target selection |
| ENSDART00000124220 | nptxrb               | 2.18017E-05 | -0.324541852 | -0.000122151 | 0.687818829 | 0.894343302  | target selection |
| ENSDART00000124346 | fn1a                 | 0.000390105 | 1.458758212  | 2.264590948  | 2.662817487 | 2.142590168  | target selection |
| ENSDART00000124440 | CAB201029822.1       | 0.001076608 | 0.125194338  | 0.049659662  | 0.670452016 | 0.712162088  | target selection |
| ENSDART00000124485 | pcdh2ab8             | 0.036614379 | 0.093884444  | 0.182265582  | 0.466276394 | 0.290720698  | target selection |
| ENSDART00000125281 | ngfra                | 0.001456887 | -0.140591626 | 0.234351775  | 0.618758909 | 0.552257695  | target selection |
| ENSDART00000125590 | adam22               | 0.000133356 | -0.13203003  | 0.438612977  | 0.776065364 | 0.829224171  | target selection |
| ENSDART00000126029 | dhx58                | 0.002259461 | 0.173247162  | -0.097510604 | 2.186112068 | 0.050096401  | target selection |
| ENSDART00000126148 | zmp:0000000912       | 0.027039876 | 0.164571908  | 0.167838799  | 1.993878391 | 0.463546785  | target selection |
| ENSDART00000126253 | fam124b              | 0.007297303 | -0.802465606 | 0.105938283  | 0.208441414 | 0.082147827  | target selection |
| ENSDART00000126299 | gdi1                 | 0.001249299 | 0.113565456  | 0.226089497  | 0.711067572 | 0.636383115  | target selection |
| ENSDART00000126542 | ppp1r14ba            | 6.23756E-05 | 0.329398236  | 1.23193061   | 1.655895613 | 1.416335991  | target selection |
| ENSDART00000126588 | rac3a                | 0.001030626 | -0.258496234 | 0.207987177  | 0.575325222 | 0.581016326  | target selection |
| ENSDART00000126873 | myh2                 | 0.000888975 | -2.902978535 | 4.975016398  | 5.62978424  | 4.2721239    | target selection |
| ENSDART00000126991 | ascl1b               | 0.003805801 | 0.538037435  | 0.289776062  | 1.627554047 | -0.154081652 | target selection |
| ENSDART00000127214 | tmct4                | 0.003138731 | -0.125359905 | 0.4024138    | 0.47318852  | 0.32908352   | target selection |
| ENSDART00000127717 | F0704622.1           | 0.044011406 | 0.358399682  | 0.167598174  | 1.49594356  | -0.017716595 | target selection |
| ENSDART00000127854 | ccni                 | 0.023810358 | 3.365173646  | 3.708027214  | 3.915718651 | 4.117994882  | target selection |
| ENSDART00000127971 | TMEM184B (1 of many) | 0.008188761 | 0.084681099  | 0.512647767  | 0.678333061 | 0.362195553  | target selection |
| ENSDART00000128174 | foxp1b               | 0.015925333 | 0.068007795  | 0.283454627  | 0.694455914 | 0.748409918  | target selection |
| ENSDART00000128457 | ephb1                | 0.008075493 | 0.374973875  | 0.620484905  | 1.032855939 | 0.805207117  | target selection |
| ENSDART00000128659 | pcdh2ab10            | 0.033001298 | 0.122813964  | 0.17598472   | 0.479887931 | 0.226887021  | target selection |
| ENSDART00000128742 | CAB201118678.1       | 0.000370918 | 0.234931395  | 0.748418816  | 0.975879993 | 0.726138214  | target selection |
| ENSDART00000128760 | pac32                | 0.002951261 | -0.00152054  | 0.063293894  | 0.531537781 | 0.626023304  | target selection |
| ENSDART00000128965 | bcar1                | 0.029418485 | 0.218283788  | 0.254312241  | 0.324642744 | 0.284302999  | target selection |
| ENSDART00000128978 | CR391998.1           | 0.012467303 | 1.262775633  | 1.767194773  | 1.40829971  | 2.265912659  | target selection |
| ENSDART00000129210 | cry1ba               | 0.000444051 | -0.306284135 | 0.315253029  | 0.635836839 | 0.449599168  | target selection |
| ENSDART00000129643 | aplnr                | 0.039820338 | -0.038448881 | 0.28030901   | 0.821411842 | 0.34582741   | target selection |
| ENSDART00000129704 | abhd17aa             | 0.001225897 | -0.089448965 | -0.057797962 | 0.474531723 | 0.44635249   | target selection |
| ENSDART00000130546 | maptb                | 0.000182178 | 0.390340472  | 1.128769701  | 1.393133544 | 1.028418073  | target selection |
| ENSDART00000130554 | isg15                | 0.009167819 | 0.469884875  | 0.09681696   | 3.101380991 | 0.025074196  | target selection |
| ENSDART00000130569 | st8sia5              | 0.00179529  | -0.025137728 | 0.545403948  | 0.761405173 | 0.616910757  | target selection |
| ENSDART00000131431 | sulf2a               | 0.000307309 | 0.379800676  | 0.895838573  | 1.99747824  | 2.182238849  | target selection |
| ENSDART00000131721 | fam65b               | 0.003648083 | -0.06007994  | 0.061772028  | 0.37892142  | 0.335909594  | target selection |
| ENSDART00000131944 | tagln3b              | 0.009948051 | 0.184610888  | 0.818287372  | 1.023242059 | 0.555937355  | target selection |
| ENSDART00000132175 | nadl1.1              | 0.000119513 | 0.709405923  | 0.881560036  | 1.238414697 | 1.046443747  | target selection |
| ENSDART00000132206 | si:dkey-242g16.2     | 0.027067133 | 0.572333551  | 0.964289734  | 1.608250495 | 0.992663233  | target selection |
| ENSDART00000132761 | arhgdig              | 0.00124178  | -3.192123378 | 0.713824666  | 1.228568907 | 0.922752193  | target selection |
| ENSDART00000133131 | uba1                 | 0.002246206 | 0.147030579  | 0.239356262  | 0.529136799 | 0.293288779  | target selection |
| ENSDART00000133466 | CR847503.1           | 0.009263143 | -0.023677254 | 0.459363169  | 0.719903439 | 0.430626169  | target selection |
| ENSDART00000133473 | CU207343.1           | 0.024547153 | 0.284146912  | 1.104685019  | 1.557001573 | 0.994606199  | target selection |
| ENSDART00000133851 | nyap2b               | 6.48692E-06 | -0.344969094 | 0.36816036   | 0.857787268 | 0.825724613  | target selection |
| ENSDART00000134044 | vdac3                | 0.00042933  | -0.155270833 | 0.146773494  | 0.378912201 | 0.402649801  | target selection |
| ENSDART00000134052 | si:dkey-17e16.8      | 0.048722402 | 0.112444287  | 0.152961651  | 0.336755528 | 0.189687147  | target selection |
| ENSDART00000134514 | smarca4a             | 0.00733086  | 0.020398578  | 0.110031025  | 0.339984244 | 0.255390677  | target selection |
| ENSDART00000134729 | BX936308.1           | 3.77986E-05 | -0.246065702 | 0.716060471  | 1.529870623 | 1.562652796  | target selection |

|                    |                    |             |              |              |             |              |                  |
|--------------------|--------------------|-------------|--------------|--------------|-------------|--------------|------------------|
| ENSDART00000134801 | ccdc92             | 0.00194329  | 0.127931369  | 0.677319918  | 0.797788944 | 0.697201329  | target selection |
| ENSDART00000135125 | serp2              | 0.018167343 | 4.40213E-05  | 0.384051284  | 0.40863701  | 0.667539121  | target selection |
| ENSDART00000135147 | si:ch211-218d20.15 | 0.001847721 | -0.111515958 | 0.398515484  | 0.749278715 | 0.887643411  | target selection |
| ENSDART00000135230 | chd7               | 0.009588901 | 0.169349437  | 0.346809261  | 0.458651128 | 0.318074781  | target selection |
| ENSDART00000135248 | anxa13l            | 0.005796202 | 2.875521493  | 3.590436866  | 3.752911284 | 3.4448321    | target selection |
| ENSDART00000135399 | phf11              | 0.025606413 | -0.105908519 | 0.331215825  | 2.01559672  | 0.351931859  | target selection |
| ENSDART00000135821 | mfsd6b             | 0.000245464 | 0.610408738  | 1.551908888  | 1.729395905 | 1.289342978  | target selection |
| ENSDART00000135989 | cep170aa           | 0.001998468 | 0.062401976  | 0.336049788  | 0.4713762   | 0.353973795  | target selection |
| ENSDART00000136103 | ubap2a             | 0.017101809 | 0.173955465  | 0.276885256  | 0.421817829 | 0.278699527  | target selection |
| ENSDART00000136141 | kcnq3              | 1.15646E-05 | -0.157652998 | 0.519381195  | 1.385651499 | 1.123132968  | target selection |
| ENSDART00000136439 | bcl7a              | 0.000926509 | 0.000990732  | 0.374886928  | 0.452965996 | 0.230358497  | target selection |
| ENSDART00000137228 | si:rp71-80o10.4    | 0.016583954 | -0.005305454 | 1.094390245  | 1.175846782 | 0.577915575  | target selection |
| ENSDART00000137240 | eef2a.2            | 0.029418485 | 2.619194541  | 2.67605773   | 3.551783602 | 3.00375243   | target selection |
| ENSDART00000137903 | BX640512.2         | 0.003143898 | -0.158278671 | -0.01949183  | 1.915495669 | -0.120027797 | target selection |
| ENSDART00000137918 | bbc3               | 0.000309757 | 0.101268325  | 0.767629492  | 0.853650102 | 0.865966102  | target selection |
| ENSDART00000138081 | bcl6ab             | 0.000589104 | 0.948060654  | 0.690527167  | 0.988530239 | 1.012261919  | target selection |
| ENSDART00000138321 | parp12b            | 0.041240008 | 0.255975647  | 0.107170029  | 0.742615255 | 0.386793554  | target selection |
| ENSDART00000138759 | clta               | 0.003329747 | -0.330987711 | -0.247185854 | 1.110067577 | 0.98649153   | target selection |
| ENSDART00000139299 | zgc:162928         | 0.01695739  | 0.559235647  | 0.580335587  | 1.258831581 | 1.081287075  | target selection |
| ENSDART00000139387 | atp1b1b            | 0.003609059 | -0.121937317 | 1.340318468  | 0.40085255  | 0.510906972  | target selection |
| ENSDART00000139702 | casp3a             | 0.000935288 | 0.559260909  | 1.157211853  | 1.445414898 | 1.128298777  | target selection |
| ENSDART00000139863 | dcbld2             | 0.015156186 | 0.210663919  | 0.284613411  | 0.515685864 | 0.299926066  | target selection |
| ENSDART00000139917 | myha               | 0.009294776 | 0.315818594  | 4.091377824  | 5.948901319 | 4.44901869   | target selection |
| ENSDART00000140230 | zgc:123068         | 0.021144031 | 0.653257046  | 0.043755773  | 2.027002482 | 0.024521261  | target selection |
| ENSDART00000140255 | si:dkey-12h9.6     | 0.007190928 | 0.01002873   | 0.192183301  | 0.434559619 | 0.43853246   | target selection |
| ENSDART00000140284 | zbtb16a            | 0.028958693 | 2.407975491  | 2.022869932  | 2.341949009 | 2.679474288  | target selection |
| ENSDART00000140301 | TTc9               | 0.001356985 | 0.099722728  | 0.582192427  | 0.813799221 | 0.513650171  | target selection |
| ENSDART00000140586 | col1a1a            | 0.05696964  | 0.136049595  | 0.737681947  | 1.130025782 | 0.5982928    | target selection |
| ENSDART00000140908 | gse1               | 0.021503672 | 0.266945251  | 0.781532641  | 1.123032019 | 0.70398488   | target selection |
| ENSDART00000140940 | cluhb              | 1.88889E-05 | -1.005907144 | -1.058846619 | 1.005581701 | -0.029667711 | target selection |
| ENSDART00000141237 | si:dkeyp-113d7.10  | 0.010693512 | -0.138953924 | 0.055420663  | 0.3781204   | 0.217616879  | target selection |
| ENSDART00000141278 | si:ch211-14c7.2    | 0.002167167 | 0.247729936  | 0.220022891  | 0.550240269 | 0.375370237  | target selection |
| ENSDART00000141338 | enc1               | 0.008595135 | 0.132252305  | 0.206249243  | 0.415692262 | 0.451357063  | target selection |
| ENSDART00000141367 | si:ch211-238n5.4   | 0.007639785 | -0.027130317 | 0.13157615   | 0.368504617 | 0.417326096  | target selection |
| ENSDART00000141444 | abcg4a             | 0.000281821 | -0.060112999 | 0.269266665  | 0.721083006 | 0.688157505  | target selection |
| ENSDART00000141446 | coro1cb            | 0.00025494  | -0.332235831 | 0.115994662  | 0.453423489 | 0.231540088  | target selection |
| ENSDART00000141750 | tnnt3b             | 0.003035847 | -1.89549374  | 3.616832877  | 4.325157956 | 3.265344737  | target selection |
| ENSDART00000141876 | frt30              | 0.039458126 | 0.380222613  | 0.277973219  | 1.408194744 | 0.300573986  | target selection |
| ENSDART00000141974 | acs13b             | 0.002176351 | -0.154671373 | 0.25230778   | 0.484219802 | 0.119435773  | target selection |
| ENSDART00000141981 | loxhd1a            | 0.006545343 | 0.329259022  | 0.257582221  | 0.952686722 | 1.148017375  | target selection |
| ENSDART00000142155 | myh14              | 0.030748502 | 0.116679043  | 0.189831513  | 0.30854982  | 0.263648695  | target selection |
| ENSDART00000142377 | MEGF9 (1 of many)  | 0.000470359 | -0.489828408 | -0.163053003 | 0.463102805 | 0.22210349   | target selection |
| ENSDART00000142919 | ssh1b              | 0.007672783 | 0.196097873  | 0.173857746  | 0.465900153 | 0.503515831  | target selection |
| ENSDART00000143697 | si:dkeyp-69e1.8    | 0.006141198 | 0.277815064  | 0.526114648  | 0.670410394 | 0.498924627  | target selection |
| ENSDART00000143819 | VASH1              | 0.001175355 | 0.033504925  | 0.324442057  | 0.595830734 | 0.534870749  | target selection |
| ENSDART00000143999 | tnnt3b             | 0.007788648 | 0.546685869  | 4.37596584   | 5.084902064 | 3.992962258  | target selection |
| ENSDART00000144342 | ppp1r14ba          | 9.11161E-05 | 0.017178827  | 0.781919568  | 1.244415225 | 1.189050173  | target selection |
| ENSDART00000144681 | anxa13l            | 0.000360396 | 0.688342481  | 1.628944564  | 2.065542903 | 1.40538163   | target selection |
| ENSDART00000144737 | srsf3b             | 0.029418485 | 0.361810279  | 0.317106803  | 0.304841622 | 0.541582711  | target selection |
| ENSDART00000144766 | nars               | 0.003162373 | 0.166803353  | 0.38562143   | 0.598983821 | 0.308867409  | target selection |
| ENSDART00000145065 | NA                 | 0.00387273  | 4.897906418  | 2.757476262  | 4.60015098  | 5.019792283  | target selection |
| ENSDART00000145124 | dact3a             | 0.021766754 | 0.112856383  | 0.770301052  | 1.625107526 | 0.355230326  | target selection |
| ENSDART00000145230 | eef1db             | 0.009491292 | 0.569560585  | 0.627404265  | 1.018116547 | 0.789247315  | target selection |
| ENSDART00000145494 | kcnq3              | 5.06657E-05 | -0.150620266 | 0.575528836  | 1.458464727 | 1.126016522  | target selection |
| ENSDART00000145605 | camk2d1            | 0.020107844 | 0.045519482  | 0.325117172  | 0.151136219 | 0.629830606  | target selection |
| ENSDART00000145886 | osbpl3b            | 0.023840313 | 0.13475307   | 0.290875362  | 0.450588606 | 0.199350453  | target selection |
| ENSDART00000146106 | nfil3-5            | 5.17084E-05 | 0.032256315  | 1.067374086  | 1.300867348 | 1.052274713  | target selection |
| ENSDART00000146107 | ywhae1             | 0.007536007 | -0.007595908 | 0.375656099  | 0.665999115 | 0.632685234  | target selection |
| ENSDART00000146180 | csnp2              | 0.003710792 | 0.237147162  | 0.374829692  | 0.697707124 | 0.402573932  | target selection |
| ENSDART00000146247 | zc2hc1a            | 0.010853056 | 0.181680565  | 0.536623189  | 0.750568991 | 0.668481158  | target selection |
| ENSDART00000146400 | st8sia5            | 0.004793697 | 0.352731191  | 0.917371468  | 1.067350167 | 0.852063315  | target selection |
| ENSDART00000146517 | dpysl2b            | 0.000112531 | 0.345677828  | 1.022911519  | 1.287775094 | 0.946528154  | target selection |
| ENSDART00000146563 | magixa             | 0.011667422 | 0.075133988  | 0.355594726  | 0.57567448  | 0.363486006  | target selection |
| ENSDART00000146708 | adar               | 0.009288398 | -0.042581428 | -0.004444765 | 0.40535861  | 0.024953366  | target selection |
| ENSDART00000146776 | tspan2b            | 0.000107854 | 0.412627689  | 1.44398444   | 1.603529521 | 0.88938646   | target selection |
| ENSDART00000146872 | emid1              | 0.002495957 | 0.014325328  | 0.393704295  | 0.644359098 | 0.692252594  | target selection |
| ENSDART00000147474 | stmn2b             | 2.74697E-05 | 0.410261377  | 1.543598694  | 2.044768785 | 1.667647819  | target selection |
| ENSDART00000147481 | phf11              | 0.071106895 | 2.519105146  | 2.056646778  | 4.198159431 | 2.169035406  | target selection |
| ENSDART00000147609 | shc1               | 4.71668E-05 | -0.131375988 | 0.113051171  | 0.56388659  | 0.681815315  | target selection |
| ENSDART00000147625 | pik3r3b            | 0.00053559  | -0.257748291 | 0.021181096  | 0.371087748 | 0.412468691  | target selection |
| ENSDART00000147794 | nt5c2l1            | 0.034100602 | 2.1295515    | 2.541950381  | 3.263642166 | 1.818207515  | target selection |
| ENSDART00000148249 | plppr4b            | 1.75467E-05 | -0.24256353  | -0.068311603 | 1.098973668 | 1.360337893  | target selection |
| ENSDART00000148280 | prn18              | 0.000193263 | 0.103510486  | 0.905956065  | 1.016662607 | 0.752186459  | target selection |
| ENSDART00000148296 | tnni1d             | 0.009288398 | 0.552273501  | 5.279876604  | 5.419924358 | 3.332159231  | target selection |
| ENSDART00000148475 | cspg5a             | 2.33589E-05 | 0.090085539  | 0.726711302  | 1.793409667 | 1.632985142  | target selection |

|                    |                   |             |              |              |             |              |                  |
|--------------------|-------------------|-------------|--------------|--------------|-------------|--------------|------------------|
| ENSDART00000148661 | stat2             | 0.006978095 | 0.11967996   | -0.016653911 | 1.354000143 | 0.023510931  | target selection |
| ENSDART00000148927 | tgfb2             | 0.017007145 | 0.452467242  | 0.589301589  | 0.923363405 | 0.590115295  | target selection |
| ENSDART00000149041 | reep1             | 0.002149847 | -0.249037096 | 0.218537351  | 0.449912583 | 0.370752516  | target selection |
| ENSDART00000149237 | xirp2a            | 0.062966527 | 0.190889632  | 0.253883647  | 0.37076536  | 0.19112506   | target selection |
| ENSDART00000149351 | scd               | 5.17084E-05 | -0.095125933 | 1.291914984  | 1.511394876 | 0.539585936  | target selection |
| ENSDART00000149684 | si:dkeyp-52c3.2   | 0.035317591 | 2.125770421  | 2.315774699  | 2.351460593 | 2.938761267  | target selection |
| ENSDART00000149730 | stox2a            | 0.007236331 | 0.026475093  | 0.234017219  | 0.506304198 | 0.292160739  | target selection |
| ENSDART00000149768 | kif21a            | 0.000349997 | -0.021643242 | 0.361851849  | 0.686688714 | 0.546979573  | target selection |
| ENSDART00000149777 | setx              | 0.006824859 | -0.020956021 | 0.009824369  | 0.394668282 | 0.077312111  | target selection |
| ENSDART00000149878 | otud4             | 0.000390311 | 0.242358714  | 0.196542793  | 0.87579795  | 0.138730183  | target selection |
| ENSDART00000149956 | apc               | 0.012706968 | 0.195183663  | 0.26527048   | 0.385323133 | 0.453680151  | target selection |
| ENSDART00000150128 | foxp1b            | 0.020184087 | 0.347545443  | 0.556370195  | 1.342974258 | 1.269825931  | target selection |
| ENSDART00000150148 | slc7a6            | 7.6604E-05  | 0.22923155   | 0.720543979  | 1.05061766  | 1.171565717  | target selection |
| ENSDART00000150362 | si:ch211-197k17.3 | 0.00308528  | -0.145582952 | 0.205377076  | 0.711396584 | 0.681320306  | target selection |
| ENSDART00000150863 | nrp2a             | 0.0002611   | 0.543372402  | 0.197731133  | 0.582446066 | 0.760458596  | target selection |
| ENSDART00000151044 | baz2ba            | 0.006344596 | 2.371956879  | 3.808025242  | 3.802702579 | 3.968575995  | target selection |
| ENSDART00000151195 | 43166             | 0.003646166 | -0.18277274  | 0.240052097  | 0.74148711  | 0.799803253  | target selection |
| ENSDART00000151717 | 43166             | 0.000507818 | 0.010098896  | 0.251138543  | 0.521642437 | 0.401235935  | target selection |
| ENSDART00000151899 | ldlrb             | 0.001252059 | -0.013482381 | 0.739364147  | 1.30137615  | 0.56832803   | target selection |
| ENSDART00000152181 | mapta             | 0.000943511 | -0.246945515 | 0.298203412  | 0.945051693 | 0.777575562  | target selection |
| ENSDART00000152284 | si:ch73-301j1.1   | 0.003849593 | -0.68804704  | -0.624114046 | 1.993753311 | -0.48476616  | target selection |
| ENSDART00000152489 | irf3              | 0.006723268 | -0.152502705 | 0.050924712  | 1.421424509 | -0.375867622 | target selection |
| ENSDART00000152636 | clocka            | 0.010610046 | 0.008631834  | 0.196030905  | 0.593132542 | 0.426491394  | target selection |
| ENSDART00000152678 | ifit10            | 0.037152675 | 0.50194473   | 0.092674262  | 4.442632616 | 1.169305685  | target selection |
| ENSDART00000153013 | eef1db            | 0.018003813 | 0.110654853  | 0.305331563  | 0.633860114 | 0.458033815  | target selection |
| ENSDART00000153087 | bmf2              | 0.016249513 | 0.285623957  | 0.323465948  | 0.348774195 | 0.627801645  | target selection |
| ENSDART00000153212 | adgra1a           | 0.000596344 | 0.27394507   | 0.382231602  | 0.735064793 | 0.705504548  | target selection |
| ENSDART00000153217 | eef1db            | 9.24337E-05 | 0.666551397  | 1.483640099  | 2.024242417 | 1.323561336  | target selection |
| ENSDART00000153289 | nos1apb           | 0.003126045 | -0.207119032 | 0.371227589  | 0.722590517 | 0.685079944  | target selection |
| ENSDART00000153377 | eef1db            | 1.1419E-05  | 0.533867077  | 0.950085432  | 1.385417409 | 1.0336151    | target selection |
| ENSDART00000153510 | si:ch73-160l8.2   | 0.032861605 | 0.056068509  | 0.128148598  | 1.161251796 | 0.352706117  | target selection |
| ENSDART00000153562 | ppfia3            | 0.004813371 | -0.022654827 | 0.232304266  | 0.485406891 | 0.444415736  | target selection |
| ENSDART00000153657 | trim3a            | 0.002721779 | 0.068235605  | 0.356875561  | 0.585605002 | 0.467600874  | target selection |
| ENSDART00000153700 | BX088707.1        | 0.01037926  | 0.029406694  | 0.3559423    | 0.787563577 | 0.447534651  | target selection |
| ENSDART00000154045 | glg1a             | 0.024649569 | 0.211468857  | 0.293330382  | 0.40088818  | 0.351496464  | target selection |
| ENSDART00000154393 | helz2             | 0.000250511 | -0.348999688 | -0.710690348 | 2.383802665 | -0.188541475 | target selection |
| ENSDART00000154719 | hip1              | 0.001124982 | 0.155954348  | 0.357624902  | 0.536540352 | 0.421858349  | target selection |
| ENSDART00000154978 | si:ch211-284f22.3 | 0.034457087 | 0.111486547  | 0.17394927   | 0.442535968 | 0.352663532  | target selection |
| ENSDART00000155094 | si:ch211-286c4.6  | 0.018611393 | 0.931010056  | 1.14507062   | 1.165043802 | 1.805632584  | target selection |
| ENSDART00000155128 | meis3             | 0.088742714 | 1.719560674  | 1.869294835  | 2.789896441 | 2.118152659  | target selection |
| ENSDART00000155190 | maptb             | 0.000235238 | 1.096239137  | 1.804532446  | 2.232737802 | 1.717568221  | target selection |
| ENSDART00000155267 | si:ch211-149e23.4 | 0.033633212 | 0.305598533  | 0.378888393  | 0.64366915  | 0.422691793  | target selection |
| ENSDART00000155368 | si:ch73-95l15.3   | 0.006605202 | 1.516126674  | 2.634881995  | 2.849448463 | 2.215584039  | target selection |
| ENSDART00000155464 | ftr73             | 0.005040201 | 0.436406361  | 0.364310996  | 2.049125852 | 0.40110848   | target selection |
| ENSDART00000155610 | tdg.2             | 0.007955678 | 0.198987795  | 0.279928785  | 0.39077816  | 0.364649362  | target selection |
| ENSDART00000155723 | si:ch211-24o10.6  | 0.041249708 | -0.255651916 | 0.580162906  | 3.993132482 | 0.654326546  | target selection |
| ENSDART00000156295 | myhb              | 0.001660423 | -2.03199835  | 4.211906798  | 4.339398917 | 2.940685436  | target selection |
| ENSDART00000156535 | vav3b             | 2.2034E-05  | -0.155549402 | 0.298871549  | 0.871724785 | 0.959064908  | target selection |
| ENSDART00000156546 | plcxd1            | 0.074703162 | 0.33889602   | 0.161133476  | 0.572020307 | 0.368311625  | target selection |
| ENSDART00000156577 | si:ch211-130m23.5 | 0.001555418 | -0.007378589 | 0.400588111  | 0.725075783 | 0.606240178  | target selection |
| ENSDART00000156690 | ftr88             | 0.038938505 | 0.478641753  | 0.356185618  | 1.950902073 | 0.248066147  | target selection |
| ENSDART00000156765 | soga3a            | 0.005830767 | 0.515035881  | 0.806381678  | 1.137120698 | 0.812578505  | target selection |
| ENSDART00000156792 | kif1aa            | 0.004591248 | -0.016449727 | 0.304055121  | 0.524314954 | 0.462526752  | target selection |
| ENSDART00000156806 | rps6k1            | 0.014022061 | 0.03495508   | 0.325476415  | 0.37135553  | 0.249571068  | target selection |
| ENSDART00000157058 | si:dkey-276j7.1   | 0.003257025 | -0.114061291 | 0.35744712   | 0.794710779 | 0.605587625  | target selection |
| ENSDART00000157407 | nacad             | 0.00067643  | -0.349281215 | 0.532726398  | 0.824860187 | 0.457523633  | target selection |
| ENSDART00000157475 | coro7             | 0.000780014 | 0.174942149  | 0.053392758  | 0.483358888 | 0.70362148   | target selection |
| ENSDART00000157663 | reln              | 0.0021138   | -0.012850615 | -0.065342924 | 0.75286937  | 0.74278543   | target selection |
| ENSDART00000157682 | kat2a             | 0.0058872   | 0.094563424  | 0.264392397  | 0.483214757 | 0.33498107   | target selection |
| ENSDART00000157817 | lrrfip1b          | 0.000829135 | -0.412751624 | 0.086992217  | 0.168101768 | 0.241775802  | target selection |
| ENSDART00000157920 | BX664622.3        | 0.008776907 | 0.309964523  | 0.2387983    | 0.211520656 | 0.43648414   | target selection |
| ENSDART00000157958 | nav3              | 0.000514549 | 0.289857115  | 0.341415382  | 0.725222646 | 0.845169813  | target selection |
| ENSDART00000158072 | gpc2              | 0.000503033 | 0.147140386  | 0.761040446  | 1.023252339 | 0.612693915  | target selection |
| ENSDART00000158098 | gpr132b           | 0.000239262 | -0.335128962 | -0.097182083 | 0.890467313 | 0.848088338  | target selection |
| ENSDART00000158532 | gnb2              | 0.000292971 | -0.185937539 | 0.268112673  | 0.644184639 | 0.701859814  | target selection |
| ENSDART00000158533 | nup50             | 0.010377142 | 0.24455835   | 0.550142856  | 0.78129311  | 0.523300254  | target selection |
| ENSDART00000158563 | wu:fj29h11        | 0.00145023  | 0.059907274  | -0.166860874 | 1.78519307  | 0.017403627  | target selection |
| ENSDART00000158825 | actc1b            | 0.011976464 | 0.015935591  | 2.858633574  | 3.729694641 | 2.583924646  | target selection |
| ENSDART00000158837 | dync1h1           | 0.002663982 | 0.179298196  | 0.363338197  | 0.829945857 | 0.598133568  | target selection |
| ENSDART00000159252 | abca3b            | 0.000342238 | 0.181429492  | 0.428459166  | 0.640212151 | 0.464148107  | target selection |
| ENSDART00000159316 | mvda              | 0.005340573 | 0.177821409  | 1.524901044  | 1.830059782 | 0.927790622  | target selection |
| ENSDART00000159454 | CAB201044277.1    | 0.01993115  | 0.109016927  | 0.066686129  | 0.335359626 | 0.279394938  | target selection |
| ENSDART00000159673 | dync1i2b          | 0.004377247 | 0.025252757  | 0.176262587  | 0.413723725 | 0.300516643  | target selection |
| ENSDART00000159782 | agtpbp1           | 0.000322759 | -0.044706055 | 0.173624177  | 0.473061984 | 0.407831162  | target selection |
| ENSDART00000160107 | CU639413.1        | 0.012966692 | 0.54252914   | 0.409259037  | 1.419043143 | 0.130740048  | target selection |

|                    |                     |             |              |              |             |              |                  |
|--------------------|---------------------|-------------|--------------|--------------|-------------|--------------|------------------|
| ENSDART00000160154 | si:dkey-238i5.2     | 0.000470962 | -0.200329967 | 0.657530632  | 1.151706484 | 1.107326351  | target selection |
| ENSDART00000160288 | FP236812.6          | 0.067256516 | 0.238382616  | 0.543365019  | 0.866982901 | 0.48841948   | target selection |
| ENSDART00000160444 | si:dkey-95j14.1     | 0.010110237 | -0.172108125 | 0.025439256  | 0.48271623  | 0.286285124  | target selection |
| ENSDART00000160571 | mxe                 | 0.005032085 | 0.057431509  | -0.237146132 | 2.037062599 | -0.095948656 | target selection |
| ENSDART00000160600 | ccrc5               | 0.002653527 | -0.047380691 | 0.036242917  | 0.854821049 | 0.34511846   | target selection |
| ENSDART00000160783 | rorcb               | 0.000119513 | -0.657257878 | 0.184912673  | 0.679992874 | 0.484278813  | target selection |
| ENSDART00000160901 | FMNL1 (1 of many)   | 0.003432504 | 1.814810207  | 1.982271858  | 2.471309982 | 2.117776194  | target selection |
| ENSDART00000161048 | psmf1               | 0.005446855 | -0.002898908 | -0.064926331 | 0.496331974 | -0.135580746 | target selection |
| ENSDART00000161081 | satb1a              | 0.000922422 | -0.172286726 | 0.059256047  | 0.306569639 | 0.367466245  | target selection |
| ENSDART00000161153 | GAN                 | 0.001865237 | -0.076211127 | 0.283155249  | 0.536837618 | 0.420868128  | target selection |
| ENSDART00000161407 | tnika               | 0.002828188 | -0.172678134 | 0.105967748  | 0.465016741 | 0.501980476  | target selection |
| ENSDART00000161566 | b4galt6             | 0.026706504 | 0.155163411  | 0.348743299  | 0.367166825 | 0.307075635  | target selection |
| ENSDART00000161693 | cetn2               | 0.000119513 | -0.42442122  | 0.157217987  | 0.592113306 | 0.77779027   | target selection |
| ENSDART00000162055 | mark1               | 0.005808489 | -0.053725407 | 0.099849875  | 0.364172927 | 0.499618468  | target selection |
| ENSDART00000162459 | scarb2a             | 0.014234373 | 0.204566318  | 0.711810949  | 0.821282796 | 0.534817262  | target selection |
| ENSDART00000162529 | zgc:172139          | 0.021599545 | 0.398363371  | 0.414482162  | 0.745277151 | 0.505205904  | target selection |
| ENSDART00000162617 | ppp2cb              | 0.012327284 | 0.050413288  | 0.287682373  | 0.42325509  | 0.191699941  | target selection |
| ENSDART00000162761 | CU984600.2          | 0.008281487 | 0.225517614  | -0.442281881 | 2.62985535  | 0.023562363  | target selection |
| ENSDART00000162838 | agr1                | 0.003446605 | 0.183430669  | 0.084636207  | 0.451853257 | 0.572854924  | target selection |
| ENSDART00000162915 | dclk2b              | 0.000530154 | 0.022821815  | 0.633802822  | 1.144009661 | 0.962163073  | target selection |
| ENSDART00000163526 | mancs1              | 0.000511051 | 0.060022776  | 0.316271416  | 0.600176682 | 0.64715281   | target selection |
| ENSDART00000163680 | hmgcs1              | 0.000409858 | 0.250779539  | 0.717953967  | 2.106714123 | 1.525845318  | target selection |
| ENSDART00000163741 | pwrrp2b             | 0.008900663 | 0.088274726  | 0.335331052  | 0.428666425 | 0.318380002  | target selection |
| ENSDART00000163930 | znfx1               | 0.000555101 | 0.194042843  | 0.097168789  | 1.523223234 | 0.201252376  | target selection |
| ENSDART00000164038 | SAMD14              | 0.00059038  | -0.096477793 | 0.217514922  | 0.565397199 | 0.769428937  | target selection |
| ENSDART00000164055 | cap2                | 0.01463785  | 0.292123593  | 0.450008213  | 0.705800498 | 0.580755871  | target selection |
| ENSDART00000164298 | RNF122              | 0.025378177 | 0.037145597  | 0.153249015  | 0.432199178 | 0.405886045  | target selection |
| ENSDART00000164585 | mnda                | 0.003470173 | -0.034972011 | 1.767545823  | 1.673143467 | 0.929274175  | target selection |
| ENSDART00000164612 | MYH7 (1 of many)    | 0.021678375 | 0.128311883  | 3.589180748  | 4.208970977 | 3.051349831  | target selection |
| ENSDART00000164647 | slc12a2             | 0.001104902 | -0.231168401 | 0.356367716  | 0.84043135  | 0.654792579  | target selection |
| ENSDART00000164809 | si:ch73-233f7.5     | 9.56612E-05 | 0.260792098  | 0.492638431  | 0.828767158 | 0.768289306  | target selection |
| ENSDART00000164853 | cnp                 | 0.01179775  | 1.119904973  | 1.074260191  | 2.53120974  | 1.692544703  | target selection |
| ENSDART00000165066 | eif2ak2             | 0.000768304 | 0.145136508  | 0.290335878  | 1.008511718 | 0.199274727  | target selection |
| ENSDART00000165199 | mapre2              | 0.003404085 | 0.262487966  | 1.260089875  | 1.425017722 | 0.706527865  | target selection |
| ENSDART00000165230 | map4k4              | 0.006674249 | -0.058109942 | 0.098582575  | 0.424133469 | 0.341075529  | target selection |
| ENSDART00000165318 | thsd7bb             | 0.000400742 | -0.173014975 | 0.179455909  | 1.051340912 | 1.022924373  | target selection |
| ENSDART00000165484 | jpt1a               | 0.001390124 | 0.363755224  | 1.1796439    | 1.211655345 | 0.942198247  | target selection |
| ENSDART00000165656 | mxd3                | 6.23756E-05 | 0.030444632  | 0.928898979  | 1.014066924 | 0.787179484  | target selection |
| ENSDART00000165824 | setdb1b             | 0.057995641 | 0.086359323  | 0.217956862  | 0.320141564 | 0.188338727  | target selection |
| ENSDART00000165877 | purp                | 0.000570625 | -0.159238984 | -0.087175961 | 1.048436006 | 0.831059287  | target selection |
| ENSDART00000165987 | DST                 | 0.053793435 | 0.207553536  | 0.19383587   | 0.337156934 | 0.233508941  | target selection |
| ENSDART00000166174 | PARP12              | 0.001662054 | 0.236086028  | 0.041618587  | 1.350827793 | 0.15615804   | target selection |
| ENSDART00000166224 | smyhc2              | 0.001834127 | 1.194842223  | 5.367086788  | 6.852910143 | 4.718916943  | target selection |
| ENSDART00000166242 | NA                  | 0.084522001 | 0.20194611   | 0.241162188  | 0.512911525 | 0.246398136  | target selection |
| ENSDART00000166268 | YTHDC2              | 0.005459224 | 0.015267861  | -0.127181664 | 0.395706164 | 0.317645369  | target selection |
| ENSDART00000166580 | pak1                | 0.001850572 | 0.254456198  | 0.505135694  | 0.67991388  | 0.523148639  | target selection |
| ENSDART00000166607 | RAPGEF4 (1 of many) | 0.000589961 | -0.233842979 | 0.163001528  | 0.421327636 | 0.212581301  | target selection |
| ENSDART00000166634 | rnf213b             | 0.005353377 | 0.322643691  | -0.072602668 | 2.242716781 | -0.029575481 | target selection |
| ENSDART00000166693 | NA                  | 0.006591698 | 0.184413566  | -0.110459993 | 1.581805418 | 0.290855458  | target selection |
| ENSDART00000166756 | mfsd11              | 0.024397386 | 0.314593735  | 0.230184492  | 0.795700169 | 0.565917277  | target selection |
| ENSDART00000167128 | pargl               | 0.012921442 | 0.159346244  | 0.133314978  | 0.619065571 | -0.065913899 | target selection |
| ENSDART00000167219 | pcdh1g26            | 0.001884118 | -0.056136761 | 0.084950376  | 0.428942573 | 0.447913813  | target selection |
| ENSDART00000167226 | pycr1b              | 0.004907334 | 0.1083633    | 0.252664475  | 0.730734657 | 0.419591074  | target selection |
| ENSDART00000167322 | si:ch73-233f7.3     | 0.009706658 | -0.088252023 | 0.25632847   | 0.562157447 | 0.392412002  | target selection |
| ENSDART00000167388 | vps33a              | 0.033661318 | 0.155328285  | 0.245633599  | 0.343008348 | 0.290252576  | target selection |
| ENSDART00000167613 | hmgcs1              | 0.006978095 | -0.061825835 | 0.154559892  | 0.893983325 | 0.609306628  | target selection |
| ENSDART00000167696 | si:ch73-233f7.4     | 0.012726801 | 0.264747026  | 0.489460093  | 0.625111029 | 0.721718733  | target selection |
| ENSDART00000167947 | CABZ01079480.1      | 0.056544045 | 0.418778383  | 0.234022686  | 1.236946888 | 0.318728833  | target selection |
| ENSDART00000168157 | mkrn2os.2           | 0.002390041 | 0.50354684   | 0.675600001  | 1.137753613 | 0.994948824  | target selection |
| ENSDART00000168167 | rtcb                | 0.011929276 | 0.060457492  | 0.250042841  | 0.449158496 | 0.303788278  | target selection |
| ENSDART00000168241 | tubb2b              | 0.000133028 | -0.194997441 | 0.285540167  | 0.888424822 | 0.706942534  | target selection |
| ENSDART00000168483 | si:dkey-16p21.7     | 0.019918813 | 0.12768447   | 0.414452748  | 0.453712173 | 0.342486315  | target selection |
| ENSDART00000168542 | arf3a               | 0.004338147 | 0.034708072  | 0.783187174  | 0.81852048  | 0.521503928  | target selection |
| ENSDART00000168559 | ttf2                | 0.00064709  | -3.902752419 | 0.990904721  | 1.020977359 | 0.830250106  | target selection |
| ENSDART00000168822 | pabpc4              | 0.000648976 | 1.120879979  | 1.597763229  | 2.131974577 | 1.975353129  | target selection |
| ENSDART00000168876 | si:dkey-81h8.1      | 0.000251123 | -0.18803818  | 0.217329319  | 0.889109393 | 1.046963425  | target selection |
| ENSDART00000168899 | pcdh1g33            | 0.000227894 | -0.406478127 | -0.012838877 | 0.30409891  | 0.306864798  | target selection |
| ENSDART00000168918 | pcdh1gc6            | 0.013984224 | 0.501599317  | 0.826475212  | 1.380988505 | 1.066751642  | target selection |
| ENSDART00000169105 | pcdh1g29            | 1.36144E-05 | -0.285141513 | 0.143203693  | 0.405619816 | 0.452362051  | target selection |
| ENSDART00000169130 | ftf64               | 0.001382674 | 0.270335706  | 0.025822717  | 1.271602536 | 0.119170332  | target selection |
| ENSDART00000169187 | ptpro               | 0.001151232 | 0.079888282  | 0.61716785   | 1.250280006 | 1.189522062  | target selection |
| ENSDART00000169341 | nrp1a               | 0.010684329 | 0.186448987  | 0.415165621  | 0.563193133 | 0.501195382  | target selection |
| ENSDART00000169648 | NA                  | 0.003509558 | 0.47490981   | 0.626028668  | 1.036581019 | 0.748938091  | target selection |
| ENSDART00000169667 | ntpro               | 1.98934E-05 | -0.163271096 | 0.493460364  | 0.820001756 | 0.696103761  | target selection |
| ENSDART00000169823 | pnpla3              | 0.017079861 | 0.41574021   | 0.387767111  | 0.775977498 | 0.378524498  | target selection |

|                    |                    |             |              |              |              |              |                   |
|--------------------|--------------------|-------------|--------------|--------------|--------------|--------------|-------------------|
| ENSDART00000169845 | pargl              | 0.003678598 | 0.069840572  | -0.083042796 | 0.787500652  | -0.250417109 | target selection  |
| ENSDART00000170184 | fgd1               | 0.00148037  | 0.020796397  | 0.102196495  | 0.582360556  | 0.487921156  | target selection  |
| ENSDART00000170341 | apba1a             | 0.002945703 | -0.229826313 | -0.069954525 | 0.548704484  | 0.456234995  | target selection  |
| ENSDART00000170405 | CARTPT (1 of many) | 0.010911523 | 1.790273718  | 2.206490975  | 2.680185278  | 2.041251968  | target selection  |
| ENSDART00000170571 | dmtn               | 0.016814523 | 0.084482265  | 0.234365609  | 0.453911363  | 0.30033427   | target selection  |
| ENSDART00000170874 | phldb1b            | 0.048701514 | 0.7459988    | 0.426405219  | 0.977480972  | 0.780660286  | target selection  |
| ENSDART00000170951 | PXDN               | 0.08148621  | 0.459355707  | 0.64772414   | 0.996368549  | 0.498632459  | target selection  |
| ENSDART00000171021 | rab3ip             | 0.002818463 | 0.020022814  | 0.162794734  | 0.729696081  | 0.694579303  | target selection  |
| ENSDART00000171178 | nlrc3l             | 0.007264025 | 0.061705987  | 0.093907561  | 0.374016309  | -0.032278843 | target selection  |
| ENSDART00000171244 | ssh2b              | 0.005083479 | -0.244446722 | -0.139215381 | 0.546963377  | 0.2356201    | target selection  |
| ENSDART00000171335 | map4k4             | 0.002682809 | 0.106316233  | 0.336083411  | 0.398966135  | 0.337674059  | target selection  |
| ENSDART00000171354 | nt5c2l1            | 0.075016406 | 0.53832785   | 0.693578932  | 1.620342483  | 0.507169588  | target selection  |
| ENSDART00000171382 | epb4l13a           | 0.001372006 | -0.440465797 | 0.150336785  | 0.618974575  | 0.751984906  | target selection  |
| ENSDART00000171433 | tnni1d             | 0.008010071 | 0.40952122   | 3.032354782  | 4.009528497  | 2.823338021  | target selection  |
| ENSDART00000171624 | Metazoa_SRP        | 0.007467603 | 1.040618727  | 2.218519951  | 2.250692356  | 1.867352594  | target selection  |
| ENSDART00000171871 | cbfb               | 0.02115372  | 0.41950513   | 0.366762581  | 0.672082991  | 0.461647583  | target selection  |
| ENSDART00000172022 | dpysl4             | 0.001494008 | 0.270457415  | 0.912051797  | 1.185681882  | 0.874375314  | target selection  |
| ENSDART00000173011 | GRXCR1             | 0.000822037 | 0.401804428  | 0.903685752  | 1.561252834  | 1.150514684  | target selection  |
| ENSDART00000173052 | map7d2b            | 0.000808461 | 0.261433378  | 1.055987677  | 1.048743858  | 0.7752628    | target selection  |
| ENSDART00000001313 | rimbp2             | 0.004394152 | -0.29201819  | -0.480722019 | -0.187717263 | 0.029819479  | brain innervation |
| ENSDART00000001805 | csmd2              | 0.014563941 | -0.646636229 | -0.876947398 | -0.300952212 | -0.072675683 | brain innervation |
| ENSDART00000002691 | tspan7b            | 0.000775407 | -0.507607245 | -0.383440036 | -0.192864148 | 0.037733122  | brain innervation |
| ENSDART00000002908 | olfm1a             | 0.000941975 | -0.612571688 | -0.410284408 | -0.115653646 | 0.220963821  | brain innervation |
| ENSDART00000003825 | cp1x2l             | 6.48692E-06 | -1.121107993 | -0.523528158 | 0.430342309  | 0.533514858  | brain innervation |
| ENSDART00000004416 | lpr1ba             | 1.45694E-05 | -0.800071532 | -0.933155051 | -0.315048731 | 0.19015716   | brain innervation |
| ENSDART00000004548 | barhl1b            | 0.009605408 | -2.472825095 | -1.41656094  | -0.268019579 | 0.230183047  | brain innervation |
| ENSDART00000004717 | igf1               | 0.001566135 | -0.688444818 | -0.421253017 | -0.11318285  | 0.107184312  | brain innervation |
| ENSDART00000005086 | atp1a1b            | 0.029368278 | -0.434454878 | -0.290341007 | -0.096388542 | -0.096973501 | brain innervation |
| ENSDART00000005929 | ppp3ca             | 0.003189261 | -0.536938929 | -0.189476468 | 0.016656951  | 0.377870736  | brain innervation |
| ENSDART00000006380 | tbx3a              | 0.004106215 | -0.244591708 | -0.352646993 | -0.144447405 | 0.06961498   | brain innervation |
| ENSDART00000006435 | gpr27              | 0.005338552 | -0.291018325 | -0.294873264 | -0.134468137 | 0.025589784  | brain innervation |
| ENSDART00000006474 | glra4b             | 2.84805E-05 | -0.56482245  | -0.497893783 | 0.107334542  | 0.502166045  | brain innervation |
| ENSDART00000006602 | pde4a              | 0.001271118 | -0.284660623 | -0.353015908 | -0.053068214 | 0.108985293  | brain innervation |
| ENSDART00000006612 | tbr1b              | 2.95145E-05 | -1.166029945 | -1.008207372 | 0.617040877  | 1.169470893  | brain innervation |
| ENSDART00000006619 | rbpms2b            | 3.29362E-06 | -0.996572205 | -0.617915271 | -0.145310289 | 0.143289699  | brain innervation |
| ENSDART00000007208 | lrrc4bb            | 0.000199258 | -0.502121898 | -0.528156819 | 0.019633372  | 0.067706598  | brain innervation |
| ENSDART00000007308 | wnt10a             | 0.000994591 | -1.246823676 | -1.58888825  | -0.322358389 | 0.209755977  | brain innervation |
| ENSDART00000007531 | slit2              | 0.008856124 | -0.281096395 | -0.311205466 | -0.174560483 | 0.038385548  | brain innervation |
| ENSDART00000007584 | snap25a            | 0.002371664 | -0.520469397 | -0.457109198 | -0.208714288 | -0.117586032 | brain innervation |
| ENSDART00000007806 | zbtb16a            | 0.004364661 | -0.634450415 | -0.731920804 | 0.190781828  | -0.364381887 | brain innervation |
| ENSDART00000007972 | dlgap4b            | 0.009649948 | -0.346497047 | -0.558852799 | -0.093125576 | -0.08715572  | brain innervation |
| ENSDART00000008594 | tmem178            | 0.000118072 | -0.626672748 | -0.469011917 | -0.272377327 | 0.052520712  | brain innervation |
| ENSDART00000008711 | gys1               | 0.002746026 | -0.668450567 | -0.607630136 | -0.28295897  | -0.009086585 | brain innervation |
| ENSDART00000008840 | otofa              | 0.003654787 | -0.788283647 | -0.975123326 | -0.33101193  | -0.149384457 | brain innervation |
| ENSDART00000009691 | scml4              | 0.001274316 | -0.348233268 | -0.325522885 | -0.113421585 | 0.115178638  | brain innervation |
| ENSDART00000009892 | gabbr1a            | 9.33581E-05 | -0.618262887 | -0.683782394 | 0.013008531  | 0.484024166  | brain innervation |
| ENSDART00000010119 | eef1a2             | 7.10385E-05 | -1.586399577 | -1.404358062 | -0.455450934 | 0.174130308  | brain innervation |
| ENSDART00000010199 | fam219ab           | 0.022425099 | -0.329176512 | -0.152550548 | -0.14317011  | 0.01066054   | brain innervation |
| ENSDART00000012391 | cabp1a             | 0.002341037 | -0.440359676 | -0.517676368 | -0.117661538 | 0.040314239  | brain innervation |
| ENSDART00000012546 | ctbp2a             | 0.01793082  | -0.410954451 | -0.209595307 | -0.078015176 | -0.146761341 | brain innervation |
| ENSDART00000012862 | isl2a              | 3.28594E-05 | -0.663813396 | 0.011664777  | 0.746201858  | 1.074694305  | brain innervation |
| ENSDART00000013228 | cacna1aa           | 8.82236E-05 | -0.425294008 | -0.48842278  | 0.10428355   | 0.42170802   | brain innervation |
| ENSDART00000013311 | grm6a              | 5.17084E-05 | -0.718441456 | -0.89272341  | -0.019297194 | 0.441642652  | brain innervation |
| ENSDART00000014897 | srgap1b            | 0.002585408 | -0.562468132 | -0.53652608  | -0.21984937  | 0.24230424   | brain innervation |
| ENSDART00000015279 | rtn4r1a            | 0.001754036 | -0.620130019 | -0.765846328 | -0.205912996 | 0.07424375   | brain innervation |
| ENSDART00000015418 | irf2bpl            | 0.001028061 | -0.517127602 | -0.432851187 | -0.112506589 | -0.180160421 | brain innervation |
| ENSDART00000015629 | stxbp1a            | 0.003413489 | -0.407999477 | -0.254916105 | -0.074938098 | 0.048338374  | brain innervation |
| ENSDART00000016535 | kcnk3a             | 0.000529346 | -1.299949965 | -1.227726419 | -0.464780559 | 0.150117362  | brain innervation |
| ENSDART00000016916 | gria4b             | 0.002016009 | -0.27171917  | -0.41554348  | -0.145968175 | 0.021630803  | brain innervation |
| ENSDART00000017229 | ncam1a             | 0.001161091 | -0.359842421 | -0.143522661 | 0.045009487  | 0.122759016  | brain innervation |
| ENSDART00000017309 | ca16b              | 0.003700234 | -0.395585068 | -0.492018229 | -0.260071918 | -0.046674115 | brain innervation |
| ENSDART00000017679 | ppp2r2ca           | 0.000199258 | -0.437371106 | -0.275733569 | 0.22042039   | 0.361372826  | brain innervation |
| ENSDART00000018351 | zgc:65851          | 8.05022E-05 | -1.669295979 | -1.346342078 | -0.126748353 | 0.319422369  | brain innervation |
| ENSDART00000019140 | rorab              | 0.000701449 | -0.499015892 | -0.249117065 | -0.271786747 | 0.004902877  | brain innervation |
| ENSDART00000019294 | si:dkcyp-75b4.9    | 7.89787E-05 | -0.789027106 | -0.841731007 | -0.221050872 | 0.359721563  | brain innervation |
| ENSDART00000019573 | zgc:65894          | 0.000144061 | -0.648921378 | -0.373996254 | 0.357740851  | 0.502243837  | brain innervation |
| ENSDART00000020174 | dynl12b            | 0.013618441 | -0.376289244 | -0.003912141 | -0.039237308 | 0.00732876   | brain innervation |
| ENSDART00000020569 | creld1b            | 0.022767452 | -0.396401062 | -0.06913614  | 0.015512001  | 0.011512871  | brain innervation |
| ENSDART00000021231 | slmapb             | 5.24617E-05 | -0.557559725 | -0.496297491 | -0.195575587 | 0.049672527  | brain innervation |
| ENSDART00000022010 | hivp2b             | 0.004657196 | -0.404683257 | -0.428225913 | -0.085969125 | 0.061919909  | brain innervation |
| ENSDART00000022042 | scn8aa             | 2.1371E-05  | -0.64882134  | -0.631929626 | 0.169338069  | 0.591046475  | brain innervation |
| ENSDART00000022768 | ak5                | 8.39504E-05 | -0.529999471 | -0.599207091 | -0.317508372 | 0.131326788  | brain innervation |
| ENSDART00000022866 | pisd               | 0.0088045   | -0.555411298 | -0.214837183 | -0.086260422 | -0.186182517 | brain innervation |
| ENSDART00000022976 | kctd16b            | 1.37519E-05 | -0.982447595 | -1.281976718 | -0.566394426 | 0.110166911  | brain innervation |
| ENSDART00000023038 | dacha              | 0.000322945 | -0.511894205 | -0.418991667 | -0.004522839 | 0.112876213  | brain innervation |

|                    |                      |             |              |              |              |              |                   |
|--------------------|----------------------|-------------|--------------|--------------|--------------|--------------|-------------------|
| ENSDART00000023210 | trim13               | 0.005927492 | -0.37704188  | -0.363410115 | -0.204332616 | 0.075535016  | brain innervation |
| ENSDART00000024778 | robo3                | 0.006011043 | -0.327155095 | -0.251732012 | -0.124129181 | 0.058627004  | brain innervation |
| ENSDART00000025031 | pou4f1               | 1.45694E-05 | -0.37458842  | -0.169318799 | 0.774588614  | 1.160187758  | brain innervation |
| ENSDART00000025256 | igfbp2b              | 7.89787E-05 | -0.742463234 | -0.107964006 | 0.616733017  | 0.74050304   | brain innervation |
| ENSDART00000025494 | hprt1l               | 0.007216648 | -0.364550689 | -0.385937863 | -0.083973479 | -0.129534044 | brain innervation |
| ENSDART00000025583 | fgf8a                | 0.004531744 | -0.058331217 | -0.819626176 | 0.05604093   | 0.237151994  | brain innervation |
| ENSDART00000025997 | dip2cb               | 0.000892442 | -0.352423277 | -0.192868324 | 0.083423296  | 0.161945092  | brain innervation |
| ENSDART00000026152 | asap2a               | 0.002746972 | -0.416411014 | -0.084267369 | -0.025927141 | 0.001189582  | brain innervation |
| ENSDART00000026378 | slc25a6              | 8.89795E-05 | -0.475274891 | -0.471356749 | -0.229323143 | 0.038491163  | brain innervation |
| ENSDART00000026401 | TMEM178B (1 of many) | 0.010150208 | -0.387053719 | -0.214500403 | -0.049460199 | 0.011667684  | brain innervation |
| ENSDART00000027345 | tmem59l              | 4.21243E-05 | -0.559867163 | -0.384910477 | -0.005343137 | 0.202377241  | brain innervation |
| ENSDART00000027398 | kcna2a               | 2.54845E-05 | -1.558634612 | -1.413069345 | -0.244650937 | 0.296687437  | brain innervation |
| ENSDART00000027463 | hmx4                 | 0.005683277 | -0.340009377 | -0.236809718 | -0.106768059 | 0.001566649  | brain innervation |
| ENSDART00000028285 | pgbd5                | 0.001885682 | -0.471148265 | -0.169774685 | 0.263561856  | 0.22277577   | brain innervation |
| ENSDART00000028338 | scamp5a              | 0.008022596 | -0.358452184 | -0.354788931 | -0.092970627 | 0.058203665  | brain innervation |
| ENSDART00000028390 | fgf12a               | 6.48692E-06 | -0.792701948 | -0.713373555 | -0.153423419 | 0.185286633  | brain innervation |
| ENSDART00000028895 | negr1                | 0.018126285 | -0.362135851 | -0.256191375 | -0.15121136  | -0.084875523 | brain innervation |
| ENSDART00000029457 | sh2d3ca              | 0.000340312 | -0.605491696 | -0.301886794 | 0.051143961  | 0.055429229  | brain innervation |
| ENSDART00000030409 | asap1b               | 0.006111083 | -0.387126717 | -0.32480613  | -0.179905202 | -0.016544261 | brain innervation |
| ENSDART00000030773 | foxo3a               | 0.000701449 | -0.522674186 | -0.346284342 | -0.025883071 | 0.086783781  | brain innervation |
| ENSDART00000031091 | vsnl1a               | 1.75467E-05 | -0.845008079 | -0.77079299  | -0.390375819 | 0.072718281  | brain innervation |
| ENSDART00000031167 | tfap2d               | 0.000251123 | -0.967562253 | -0.629795841 | 0.638492839  | 1.047009841  | brain innervation |
| ENSDART00000031546 | chrna6               | 2.82487E-05 | -0.487671995 | -0.420962215 | 0.210734418  | 0.46609085   | brain innervation |
| ENSDART00000031937 | diras1a              | 0.00058454  | -0.474540918 | -0.418703997 | -0.179232074 | -0.012563291 | brain innervation |
| ENSDART00000032161 | galnt14              | 0.009427844 | -0.529482639 | -0.362873656 | -0.264119496 | -0.01842007  | brain innervation |
| ENSDART00000033361 | tyh3b                | 0.000150409 | -0.3186879   | -0.037617104 | 0.269211477  | 0.394612295  | brain innervation |
| ENSDART00000033657 | grm6b                | 0.000670763 | -0.379593806 | -0.511743403 | -0.159835887 | 0.100793439  | brain innervation |
| ENSDART00000034790 | pcp4l1               | 0.000799851 | -0.408039344 | -0.390896541 | -0.213514281 | -0.035791454 | brain innervation |
| ENSDART00000034849 | grin1b               | 0.002361523 | -0.325252553 | -0.609188282 | -0.185270574 | 0.122354295  | brain innervation |
| ENSDART00000036015 | ryr1b                | 0.000999216 | -0.116788998 | -0.165312146 | 0.372637833  | 0.693396813  | brain innervation |
| ENSDART00000037126 | eno2                 | 4.91848E-05 | -0.315372643 | -0.196767149 | 0.300750061  | 0.433471501  | brain innervation |
| ENSDART00000037265 | olfm1b               | 0.001442301 | -0.595000689 | -1.108211527 | -0.18099665  | 0.18250463   | brain innervation |
| ENSDART00000037848 | dpp6b                | 0.004843495 | -0.469010511 | -0.191315433 | -0.026922326 | -0.081540125 | brain innervation |
| ENSDART00000038294 | tps3inp1             | 0.025035616 | -0.610161281 | 0.029061275  | -0.033185195 | -0.028504863 | brain innervation |
| ENSDART00000038740 | galnt9               | 1.45694E-05 | -0.705450847 | -0.542663541 | -0.098391024 | 0.177029625  | brain innervation |
| ENSDART00000040049 | camk2d2              | 0.002828188 | -0.441100303 | -0.359209869 | -0.184359733 | 0.062709499  | brain innervation |
| ENSDART00000040184 | tenm1                | 0.015961295 | -0.25843006  | -0.314319075 | -0.175496746 | -0.005818614 | brain innervation |
| ENSDART00000040278 | efna2a               | 0.000117841 | -0.820985512 | -0.748851824 | -0.238813858 | 0.346525856  | brain innervation |
| ENSDART00000040456 | cdc42bpab            | 0.001587567 | -0.484798472 | -0.258449967 | -0.177779388 | 0.139329121  | brain innervation |
| ENSDART00000040500 | tspan9a              | 0.025495825 | -0.374305977 | -0.544164723 | -0.123124308 | -0.153915406 | brain innervation |
| ENSDART00000040537 | gjd1a                | 0.000656024 | -0.214902855 | -0.214222628 | 0.04546907   | 0.177131603  | brain innervation |
| ENSDART00000040669 | sphkap               | 0.000260159 | -0.388395859 | -0.454597188 | 0.021563144  | 0.051812339  | brain innervation |
| ENSDART00000041714 | atp6v0a1b            | 0.001487934 | -0.327889206 | -0.302694525 | -0.070700098 | 0.131627227  | brain innervation |
| ENSDART00000041740 | ubl7a                | 0.000296518 | -0.21096997  | -0.119372658 | 0.298633763  | 0.574535573  | brain innervation |
| ENSDART00000041800 | epha8                | 0.002472108 | -0.019296449 | -0.346405332 | 0.164805877  | 0.748357168  | brain innervation |
| ENSDART00000041820 | lingo1a              | 0.017075627 | -0.3685918   | -0.267056385 | -0.206204269 | -0.004686852 | brain innervation |
| ENSDART00000041869 | grin1a               | 0.006472926 | -0.314741638 | -0.554584424 | -0.238417502 | 0.088185899  | brain innervation |
| ENSDART00000042083 | gria4a               | 0.0035639   | -0.246573777 | -0.413439839 | -0.038291419 | 0.265641743  | brain innervation |
| ENSDART00000042683 | cadpsb               | 2.18017E-05 | -0.417914059 | -0.394489719 | 0.149869704  | 0.381243736  | brain innervation |
| ENSDART00000042972 | srpk1b               | 0.001312564 | -0.590887937 | -0.595753709 | -0.259675811 | -0.090086557 | brain innervation |
| ENSDART00000042984 | epha6                | 0.019981901 | -4.335346398 | -2.736601299 | -1.023821359 | 0.479123476  | brain innervation |
| ENSDART00000043312 | srsf5a               | 0.000184045 | -0.406457659 | -0.349179029 | 0.276259838  | -0.003669678 | brain innervation |
| ENSDART00000043823 | osbp10b              | 0.014034602 | -0.615302858 | -0.415836047 | -0.293972471 | 0.154234814  | brain innervation |
| ENSDART00000043857 | irx5a                | 8.26035E-05 | -0.492824084 | -0.561776224 | 0.072886283  | 0.234832625  | brain innervation |
| ENSDART00000043924 | mpp6b                | 0.002539705 | -0.45376092  | -0.273823891 | -0.178237916 | -0.157850955 | brain innervation |
| ENSDART00000044241 | KCNQ2 (1 of many)    | 1.2193E-05  | -0.793205862 | -0.43808803  | 0.589879296  | 0.84351704   | brain innervation |
| ENSDART00000044276 | dip2bb               | 0.000804407 | -0.182549034 | -0.085935994 | 0.236910154  | 0.379645319  | brain innervation |
| ENSDART00000044371 | tox                  | 0.000891702 | -0.382184105 | -0.377592563 | -0.085511133 | 0.05287602   | brain innervation |
| ENSDART00000044423 | mag11b               | 0.000170813 | -0.521004582 | -0.785194432 | 0.042021364  | 0.52355612   | brain innervation |
| ENSDART00000044678 | GABRA2 (1 of many)   | 0.020491546 | -0.18505593  | -0.452041699 | -0.058625322 | 0.015850219  | brain innervation |
| ENSDART00000045086 | prkceb               | 0.014103468 | -0.397671937 | -0.107653926 | 0.08012307   | 0.031299867  | brain innervation |
| ENSDART00000045628 | irx6a                | 0.000781013 | -0.424070635 | -0.239579413 | 0.17038084   | 0.276181325  | brain innervation |
| ENSDART00000045861 | slc43a2a             | 0.000311245 | -0.304475968 | -0.378976343 | 0.111239312  | 0.188992557  | brain innervation |
| ENSDART00000045888 | tkta                 | 0.001494578 | -0.540178562 | -0.404491163 | -0.145350137 | 0.055411831  | brain innervation |
| ENSDART00000046211 | lnx2a                | 0.039476911 | -0.592157981 | -0.322543056 | -0.148137638 | -0.128059395 | brain innervation |
| ENSDART00000046438 | kcnk2b               | 0.000775831 | -1.164610191 | -1.614380279 | -0.460863171 | 0.258871322  | brain innervation |
| ENSDART00000046530 | rab42a               | 0.000219336 | -0.542354056 | -0.349553972 | -0.104901238 | 0.132258211  | brain innervation |
| ENSDART00000047399 | mmp24                | 4.91848E-05 | -0.337136574 | -0.281370104 | 0.467116638  | 0.594580786  | brain innervation |
| ENSDART00000047569 | igf2b                | 5.24617E-05 | -0.538912754 | -0.46572679  | -0.194582206 | 0.102619195  | brain innervation |
| ENSDART00000048855 | mtus1b               | 0.002977128 | -0.449558058 | -0.427741832 | 0.166302333  | 0.000701193  | brain innervation |
| ENSDART00000048994 | pbx3b                | 0.000910662 | -0.545498331 | -0.428509616 | 0.129533791  | 0.149586816  | brain innervation |
| ENSDART00000049177 | rab6ba               | 2.09905E-05 | -0.532131764 | -0.115244957 | 0.417564602  | 0.557714845  | brain innervation |
| ENSDART00000049462 | rab15                | 0.000457208 | -0.425089968 | -0.185335259 | 0.21479615   | 0.289096284  | brain innervation |
| ENSDART00000049992 | syt9b                | 2.01848E-05 | -0.672988403 | -0.530192885 | 0.095421952  | 0.328394957  | brain innervation |
| ENSDART00000050037 | chrnb3b              | 6.48692E-06 | -0.414911692 | -0.004263798 | 0.444800143  | 0.950014126  | brain innervation |

|                   |                   |             |              |              |              |              |                   |
|-------------------|-------------------|-------------|--------------|--------------|--------------|--------------|-------------------|
| ENSDART0000050077 | sdcbp             | 0.000304005 | -0.585127298 | -0.412438306 | -0.175403243 | -0.033038502 | brain innervation |
| ENSDART0000050303 | b3gat2            | 0.001365289 | -0.439065182 | -0.488507748 | -0.270928467 | 0.095807034  | brain innervation |
| ENSDART0000050308 | calm1b            | 0.011264952 | -0.359535363 | -0.241046962 | -0.074464366 | 0.015414816  | brain innervation |
| ENSDART0000050311 | rltrp             | 0.000161203 | -0.433814029 | -0.24205503  | 0.339832334  | 0.433192877  | brain innervation |
| ENSDART0000050445 | trim2a            | 0.004134049 | -0.427473932 | -0.288810529 | -0.127175492 | 0.041370255  | brain innervation |
| ENSDART0000050762 | phactr3b          | 0.00849815  | -0.629592387 | -0.363049766 | -0.266715209 | -0.083768273 | brain innervation |
| ENSDART0000051182 | arhgap4b          | 0.003900528 | -0.41225839  | -0.320516515 | -0.225939723 | -0.055826953 | brain innervation |
| ENSDART0000051693 | irx4a             | 0.000591404 | -1.596922819 | -2.014349322 | 0.164610846  | 0.924604512  | brain innervation |
| ENSDART0000052113 | lingo1b           | 0.029426879 | -0.427473932 | -0.148396867 | -0.080123582 | -0.033848116 | brain innervation |
| ENSDART0000052346 | gnao1b            | 0.000112893 | -0.534691372 | -0.39418636  | -0.143300564 | 0.218777626  | brain innervation |
| ENSDART0000052802 | calb2b            | 3.76305E-05 | -1.334486374 | -1.407708939 | -0.475837952 | 0.218368357  | brain innervation |
| ENSDART0000054137 | igfbp5b           | 0.000573039 | -0.49960111  | -0.321727345 | 0.242454388  | 0.365417817  | brain innervation |
| ENSDART0000054137 | dlgap1b           | 0.000993187 | -0.55212867  | -0.830902632 | -0.186012386 | 0.281181047  | brain innervation |
| ENSDART0000054552 | cdh8              | 0.000956736 | -0.482196874 | -0.526834841 | -0.273874965 | 0.0505098    | brain innervation |
| ENSDART0000054833 | rgs11             | 5.42724E-05 | -0.582556718 | -0.789821251 | -0.427532995 | 0.127688375  | brain innervation |
| ENSDART0000054989 | fscn1b            | 0.000261639 | -0.529299226 | -0.417661269 | 0.066759573  | 0.494675778  | brain innervation |
| ENSDART0000055038 | rybpa             | 0.00042906  | -0.189184893 | -0.138456944 | 0.268105644  | 0.373370341  | brain innervation |
| ENSDART0000055269 | ngng13b           | 1.11583E-05 | -0.70656822  | -0.547882014 | 0.352208471  | 0.531882213  | brain innervation |
| ENSDART0000055936 | isl2b             | 4.91848E-05 | -1.527471977 | -1.312125436 | 0.470803449  | 0.853726063  | brain innervation |
| ENSDART0000056138 | igsf8             | 0.001004207 | -0.41438699  | -0.276734989 | -0.097715498 | 0.052342087  | brain innervation |
| ENSDART0000056328 | elovl4b           | 0.005164205 | -0.472600721 | -0.194626997 | -0.10087467  | 0.110456628  | brain innervation |
| ENSDART0000056369 | cadm2a            | 0.04906434  | -0.17754586  | -0.327047473 | -0.068598077 | -0.03429359  | brain innervation |
| ENSDART0000056639 | faim2a            | 0.008797915 | -0.345615546 | -0.285647372 | -0.169343793 | 0.000937504  | brain innervation |
| ENSDART0000056671 | brinp2            | 8.25087E-05 | -0.564206507 | -0.55260615  | -0.353392227 | 0.031594069  | brain innervation |
| ENSDART0000056885 | CU929046.1        | 2.74697E-05 | -0.462145697 | -0.331087748 | 0.285634599  | 0.389113052  | brain innervation |
| ENSDART0000057369 | igfbp5a           | 0.010190417 | -0.503493701 | -0.12557648  | 0.011432007  | -0.035083178 | brain innervation |
| ENSDART0000058736 | grm4              | 8.05022E-05 | -0.475368296 | -0.757934708 | -0.299132614 | 0.099413724  | brain innervation |
| ENSDART0000058829 | scrt1b            | 0.000688325 | -0.466509454 | -0.564612343 | -0.054278048 | 0.250358448  | brain innervation |
| ENSDART0000058877 | rap2ab            | 8.2583E-05  | -0.786170126 | -0.835369537 | -0.021239814 | 0.42494962   | brain innervation |
| ENSDART0000059179 | nptxra            | 0.000962944 | -0.572157626 | -0.495039684 | -0.356374901 | -0.015079326 | brain innervation |
| ENSDART0000059228 | wil1              | 0.006605202 | -0.324461409 | -0.136026611 | -0.08718702  | 0.103993243  | brain innervation |
| ENSDART0000059631 | BX936415.1        | 0.005303358 | -0.988751505 | -1.218737364 | -0.343900834 | 0.242173034  | brain innervation |
| ENSDART0000059841 | si:ch211-257p13.3 | 1.18742E-05 | -0.713606094 | -0.675183925 | 0.07538087   | 0.401418787  | brain innervation |
| ENSDART0000059869 | adra2a            | 0.000142155 | -1.042718178 | -0.710015995 | -0.232479367 | 0.220270649  | brain innervation |
| ENSDART0000060051 | fgf14             | 0.028223243 | -0.493332703 | -0.385375543 | -0.154886482 | -0.098910242 | brain innervation |
| ENSDART0000060160 | calb2a            | 1.97197E-05 | -1.24004036  | -1.237007367 | -0.232768326 | 0.397108945  | brain innervation |
| ENSDART0000060625 | lgi3              | 6.84125E-05 | -0.698992604 | -0.869112792 | -0.10986795  | 0.409134057  | brain innervation |
| ENSDART0000062697 | gfra2a            | 0.003719587 | -0.450482933 | -0.554254218 | -0.069449306 | -0.130685043 | brain innervation |
| ENSDART0000062874 | atp1b3b           | 0.000182199 | -0.415562805 | -0.319287363 | -0.078895256 | 0.137689897  | brain innervation |
| ENSDART0000062887 | disp2             | 2.923E-05   | -0.441631902 | -0.296469901 | 0.444242177  | 0.781646932  | brain innervation |
| ENSDART0000063783 | itm2ca            | 0.000867732 | -0.362486731 | -0.282712517 | -0.07258841  | 0.153576522  | brain innervation |
| ENSDART0000063825 | sprn              | 0.013488739 | -0.451586162 | -0.272184034 | -0.06406637  | 0.092302795  | brain innervation |
| ENSDART0000064672 | NA                | 5.42724E-05 | -1.010331454 | -0.756315191 | -0.126164495 | 0.278123254  | brain innervation |
| ENSDART0000064833 | mafaa             | 0.002047801 | -0.957052225 | -1.143383392 | -0.379735148 | 0.067354966  | brain innervation |
| ENSDART0000064902 | ssbp4             | 0.000263251 | -0.349245142 | -0.241492171 | 0.147485085  | 0.214650497  | brain innervation |
| ENSDART0000065159 | zgc:158291        | 3.4928E-05  | -1.165646756 | -0.784542684 | 0.443310678  | 0.751149417  | brain innervation |
| ENSDART0000065372 | kcnj3b            | 9.03292E-05 | -0.605628976 | -0.778191304 | -0.104344748 | 0.360074992  | brain innervation |
| ENSDART0000065599 | cadm1a            | 0.004110692 | -0.54681119  | -0.778847768 | -0.187580903 | 0.116530415  | brain innervation |
| ENSDART0000065929 | hs6st3b           | 0.000935288 | -0.878348455 | -0.942691238 | -0.255367675 | 0.253670478  | brain innervation |
| ENSDART0000066192 | glra2             | 0.00133046  | -0.5075286   | -0.700662657 | -0.376893165 | 0.421840665  | brain innervation |
| ENSDART0000066294 | cdk5r1b           | 7.6604E-05  | -0.511562763 | -0.495240798 | 0.085364893  | 0.188592346  | brain innervation |
| ENSDART0000066372 | id4               | 4.11188E-05 | -0.719733282 | -0.518590484 | 0.441847928  | 0.655214602  | brain innervation |
| ENSDART0000066839 | slc35g2b          | 7.55931E-05 | -0.671846523 | -0.750415444 | -0.309110396 | 0.04424778   | brain innervation |
| ENSDART0000067514 | rlbpms2a          | 4.11188E-05 | -1.175610868 | -1.156235961 | 0.045281157  | 0.593799851  | brain innervation |
| ENSDART0000067531 | syn2a             | 8.82236E-05 | -0.50370548  | -0.414636803 | -0.227904446 | 0.132370635  | brain innervation |
| ENSDART0000073919 | kncn1b            | 2.71226E-05 | -0.758440974 | -0.784989596 | -0.33092052  | 0.322314215  | brain innervation |
| ENSDART0000073950 | olfm1a            | 7.10385E-05 | -0.852827208 | -0.587563633 | 0.013637392  | 0.435090193  | brain innervation |
| ENSDART0000074036 | rcvrna            | 0.035967167 | -0.553376367 | -0.06531313  | -0.11758335  | -0.07626787  | brain innervation |
| ENSDART0000074362 | pcdh18b           | 0.00033039  | -0.440881831 | -0.447646282 | -0.227758863 | 0.176890552  | brain innervation |
| ENSDART0000074543 | hs3st4            | 0.007620644 | -0.453389419 | -0.572006435 | -0.310659668 | 0.002760951  | brain innervation |
| ENSDART0000074678 | chrnb3a           | 4.11188E-05 | -0.683036397 | -0.585209438 | -0.069659384 | 0.207417172  | brain innervation |
| ENSDART0000074698 | opn3              | 0.003138642 | -0.589287895 | -0.235981184 | 0.224725485  | -0.032745726 | brain innervation |
| ENSDART0000074718 | spire1b           | 0.006352299 | -0.446651583 | -0.478750814 | -0.155393912 | -0.07838085  | brain innervation |
| ENSDART0000074997 | CU302436.3        | 0.001679054 | -0.857583363 | -0.990723788 | -0.187854306 | 0.199234775  | brain innervation |
| ENSDART0000075123 | pcp4a             | 4.91848E-05 | -0.598752351 | -0.632528063 | -0.40265776  | -0.022235336 | brain innervation |
| ENSDART0000075278 | atp1b4            | 0.008495106 | -0.758712842 | -0.43098592  | -0.240547748 | -0.077197984 | brain innervation |
| ENSDART0000075340 | eef1a1b           | 2.23813E-05 | -0.66677551  | -0.473919347 | -0.344351157 | 0.106841151  | brain innervation |
| ENSDART0000075749 | ppp2r2ca          | 0.000117007 | -0.492014929 | -0.268923214 | 0.328067214  | 0.425314748  | brain innervation |
| ENSDART0000075918 | pcmtd2            | 0.00393919  | -0.427264647 | -0.257111837 | -0.149394946 | 0.062644737  | brain innervation |
| ENSDART0000076946 | PDE4DIP           | 0.000299141 | -0.575491599 | -0.478988093 | -0.210265098 | -0.157443712 | brain innervation |
| ENSDART0000077216 | astn1             | 0.002342395 | -0.280184115 | -0.378831195 | -0.109389357 | 0.054556021  | brain innervation |
| ENSDART0000077222 | ldlrad4b          | 0.002766629 | -0.327819788 | -0.475734059 | -0.025614815 | 0.028486052  | brain innervation |
| ENSDART0000078079 | pcnxl2            | 0.000511051 | -0.518593139 | -0.325199094 | 0.020646332  | 0.403616211  | brain innervation |
| ENSDART0000078115 | sdhda             | 0.002274284 | -0.602799581 | -0.148637611 | 0.027660422  | 0.175615096  | brain innervation |
| ENSDART0000078232 | cdh10a            | 0.005048068 | -0.495858439 | -0.491434243 | -0.331011431 | 0.033804718  | brain innervation |

|                    |                    |             |              |              |              |              |                   |
|--------------------|--------------------|-------------|--------------|--------------|--------------|--------------|-------------------|
| ENSDART00000078561 | SPTBN4             | 0.000403881 | -0.239897718 | -0.33102434  | 0.293671093  | 0.445086753  | brain innervation |
| ENSDART00000078856 | dlg3               | 0.001948843 | -0.31041276  | -0.361138693 | -0.191257864 | 0.041004354  | brain innervation |
| ENSDART00000079092 | si:dkey-261i16.5   | 0.004123458 | -0.526813533 | -0.563690076 | -0.369398724 | 0.061616577  | brain innervation |
| ENSDART00000079138 | ptenb              | 0.013692958 | -0.337433521 | -0.277401842 | -0.145004066 | -0.034401548 | brain innervation |
| ENSDART00000079144 | ptenb              | 0.00889295  | -0.303152595 | -0.238217531 | -0.001915727 | -0.031063744 | brain innervation |
| ENSDART00000079443 | GABRA2 (1 of many) | 0.000263077 | -0.623319426 | -0.542833879 | -0.157704672 | 0.138036393  | brain innervation |
| ENSDART00000079840 | rorca              | 0.006111083 | -0.65562057  | -0.064052995 | 0.161319682  | 0.103804992  | brain innervation |
| ENSDART00000080064 | CR847953.1         | 0.004084205 | 0.050009503  | -0.040451977 | 0.259802571  | 0.438904414  | brain innervation |
| ENSDART00000080486 | ywhag1             | 1.75467E-05 | -1.02392497  | -0.686234935 | -0.010129168 | 0.2177797    | brain innervation |
| ENSDART00000080808 | six3a              | 0.000687981 | -0.437705937 | -0.430575558 | -0.140593988 | -0.07114268  | brain innervation |
| ENSDART00000080927 | snap25b            | 0.001998235 | -0.418114286 | -0.385475041 | -0.102955296 | 0.076752829  | brain innervation |
| ENSDART00000081140 | CT990561.1         | 0.000401616 | -0.348057632 | -0.380510005 | -0.109063338 | 0.180807023  | brain innervation |
| ENSDART00000082301 | myrip              | 0.000993187 | -0.137038516 | -0.238384017 | 0.084718693  | 0.41131665   | brain innervation |
| ENSDART00000082745 | EMB                | 0.000245083 | -0.651102521 | -0.703010006 | -0.074268357 | 0.192993872  | brain innervation |
| ENSDART00000082842 | JPH3 (1 of many)   | 0.000165745 | -0.540363483 | -0.227235849 | 0.34555956   | 0.43863208   | brain innervation |
| ENSDART00000083040 | hs3st2             | 0.000442216 | -1.059711916 | -1.469328404 | -0.190665179 | 0.30791737   | brain innervation |
| ENSDART00000083066 | asphd2             | 0.000463544 | -0.487940941 | -0.316881347 | -0.126036033 | 0.003992278  | brain innervation |
| ENSDART00000083569 | oaz2b              | 2.90186E-05 | -0.447559352 | -0.669337328 | -0.007273423 | 0.348858251  | brain innervation |
| ENSDART00000083670 | CAB201041604.1     | 0.025197766 | -0.549505735 | -0.427354636 | -0.238335089 | -0.140824262 | brain innervation |
| ENSDART00000084014 | cplx1              | 2.54845E-05 | -0.741807214 | -0.862001833 | -0.211893904 | 0.449532765  | brain innervation |
| ENSDART00000084119 | si:ch1073-44g3.1   | 0.001946729 | -0.384776638 | -0.202587046 | 0.01646479   | 0.134112994  | brain innervation |
| ENSDART00000084264 | adcy2a             | 0.000976529 | -0.574108823 | -0.494423944 | 0.049230433  | 0.113035845  | brain innervation |
| ENSDART00000084354 | cpeb3              | 0.004463264 | -0.1650884   | -0.603027317 | 0.172363697  | 0.2398868    | brain innervation |
| ENSDART00000084355 | zgc:165481         | 0.000683159 | -0.665978496 | -0.883055142 | -0.199024252 | -0.082238068 | brain innervation |
| ENSDART00000084730 | zgc:162160         | 1.57453E-05 | -0.758204424 | -0.82447566  | -0.164736838 | 0.207922006  | brain innervation |
| ENSDART00000084890 | si:ch211-284e13.4  | 0.000766042 | -0.124688162 | -0.262617592 | 0.237393976  | 0.369141192  | brain innervation |
| ENSDART00000085210 | cacna1ha           | 0.001618544 | -0.413195046 | -0.405391107 | -0.236177845 | 0.006546496  | brain innervation |
| ENSDART00000085253 | mid1               | 0.001365289 | -0.357661223 | -0.330080838 | -0.002902011 | 0.078651096  | brain innervation |
| ENSDART00000085472 | grm2a              | 0.000638552 | -0.506007863 | -0.654883229 | -0.268518199 | 0.087304206  | brain innervation |
| ENSDART00000085565 | capn15             | 0.002791482 | -0.382220369 | -0.426351921 | -0.021041552 | 0.033591442  | brain innervation |
| ENSDART00000085573 | rgs7bpa            | 0.003138642 | -0.750985181 | -0.701592527 | -0.219110071 | -0.146877341 | brain innervation |
| ENSDART00000085743 | AL935194.1         | 0.002127025 | -0.774745358 | -0.68914542  | -0.32626184  | 0.039334462  | brain innervation |
| ENSDART00000086617 | gabbr2             | 1.88318E-05 | -0.577324776 | -0.926125922 | -0.433004274 | 0.052999603  | brain innervation |
| ENSDART00000086797 | adgrl3.1           | 0.00088836  | -0.114053477 | -0.068166121 | 0.465121947  | 0.57391191   | brain innervation |
| ENSDART00000087118 | xytl1              | 0.004031897 | -0.272537601 | -0.39007956  | -0.067871098 | 0.053209242  | brain innervation |
| ENSDART00000087148 | cbln4              | 0.000138972 | -0.802680954 | -0.769511703 | -0.146403482 | 0.304907793  | brain innervation |
| ENSDART00000087199 | mark4a             | 0.000877772 | -0.415170271 | -0.372344968 | 0.042679549  | 0.108705644  | brain innervation |
| ENSDART00000087280 | cacnb3a            | 0.000177237 | -0.323388935 | -0.465191463 | 0.268224123  | 0.533679905  | brain innervation |
| ENSDART00000087426 | bcl11aa            | 3.5708E-05  | -0.367520296 | -0.334252656 | 0.232372171  | 0.511163847  | brain innervation |
| ENSDART00000087441 | GFOD1              | 0.020470078 | -0.421601041 | -0.219799435 | -0.160457067 | 0.058971995  | brain innervation |
| ENSDART00000087586 | c2cd4a             | 0.000100528 | -0.882018106 | -1.482044104 | -0.368555759 | 0.13043866   | brain innervation |
| ENSDART00000087857 | unc5db             | 0.000103226 | -0.464548804 | -0.771046574 | -0.267052184 | 0.0901494    | brain innervation |
| ENSDART00000088159 | nrxn1a             | 0.00486688  | -0.55423697  | -0.307440551 | 0.007663974  | -0.036725507 | brain innervation |
| ENSDART00000088178 | nrxn1a             | 0.000255127 | -0.424942944 | -0.357890595 | -0.01594532  | 0.150075885  | brain innervation |
| ENSDART00000088199 | zgc:162707         | 0.004813371 | -0.481388546 | -0.51007366  | -0.179950315 | -0.039369231 | brain innervation |
| ENSDART00000088249 | hcn4l              | 0.001402519 | -0.487910369 | -0.340719397 | 0.02727434   | 0.039415999  | brain innervation |
| ENSDART00000088833 | si:ch73-233f7.1    | 0.00031728  | -1.214678988 | -0.552820604 | -0.229157577 | 0.532052231  | brain innervation |
| ENSDART00000089574 | tub                | 0.003777754 | -0.338808988 | -0.401453479 | -0.101730157 | -0.038037712 | brain innervation |
| ENSDART00000089699 | prrt1              | 0.000415146 | -0.603201784 | -0.702306626 | -0.280611263 | -0.047540659 | brain innervation |
| ENSDART00000089867 | ppp2r2cb           | 0.018790846 | -0.452836704 | -0.44451904  | -0.189867818 | -0.082146078 | brain innervation |
| ENSDART00000090019 | zeb2b              | 0.016845819 | -0.694941899 | -0.428168304 | -0.296660745 | 0.024845807  | brain innervation |
| ENSDART00000090306 | xpr1a              | 0.001093301 | -0.158299732 | -0.301120383 | 0.179396195  | 0.424625304  | brain innervation |
| ENSDART00000090397 | kiaa1549la         | 4.91848E-05 | -0.446832614 | -0.575803117 | -0.232865535 | 0.10265337   | brain innervation |
| ENSDART00000090844 | zgc:153018         | 0.006825939 | -0.414733046 | -0.080390611 | -0.214556251 | -0.032786964 | brain innervation |
| ENSDART00000091004 | pcdh1a             | 0.000227894 | -0.630879138 | -0.627674521 | -0.227167517 | 0.17418403   | brain innervation |
| ENSDART00000091489 | ppp1r9bb           | 0.000117869 | -0.563706295 | -0.346664158 | -0.080794638 | 0.037246954  | brain innervation |
| ENSDART00000091664 | apc2               | 0.011436776 | -0.58155429  | -0.22615315  | 0.136652181  | 0.006999355  | brain innervation |
| ENSDART00000091726 | fam78ba            | 4.91848E-05 | -0.542782218 | -0.34207093  | 0.322203074  | 0.384590985  | brain innervation |
| ENSDART00000091818 | tulp4b             | 4.52852E-05 | -0.531343855 | -0.277019809 | 0.128892269  | 0.551121944  | brain innervation |
| ENSDART00000091955 | nrxn2b             | 0.004348675 | -0.362328969 | -0.38605701  | -0.167716958 | 0.046918181  | brain innervation |
| ENSDART00000092182 | ppm1la             | 0.000340312 | -0.411282562 | -0.137536548 | 0.156346356  | 0.193635075  | brain innervation |
| ENSDART00000092250 | btbd11a            | 0.005509984 | -0.250819977 | -0.42148278  | -0.144893414 | 0.093892491  | brain innervation |
| ENSDART00000092257 | PLD5               | 5.26677E-05 | -0.97635635  | -0.828911686 | 0.040708181  | 0.36058098   | brain innervation |
| ENSDART00000092665 | sreb1              | 0.004619636 | -0.417658309 | -0.274360919 | 0.114636817  | 0.022214824  | brain innervation |
| ENSDART00000093310 | celf5a             | 0.002632159 | -0.268154664 | -0.455004312 | 0.014815598  | 0.070405312  | brain innervation |
| ENSDART00000093730 | dnm1b              | 4.69744E-05 | -0.51283412  | -0.480365631 | 0.101619237  | 0.531582232  | brain innervation |
| ENSDART00000093795 | cntnap3            | 0.004847659 | -0.160493697 | -0.529313782 | -0.088115665 | 0.248028839  | brain innervation |
| ENSDART00000093935 | si:dkey-226m8.10   | 0.000254175 | -0.692305988 | -0.817395111 | -0.44855289  | 0.050175879  | brain innervation |
| ENSDART00000094082 | GJD2 (1 of many)   | 7.52983E-05 | -0.795483498 | -0.746707283 | 0.031300804  | 0.456345915  | brain innervation |
| ENSDART00000094311 | KCNJ4              | 0.008555913 | -0.486217707 | -0.434414335 | -0.027097558 | 0.056787682  | brain innervation |
| ENSDART00000094667 | camk2b1            | 0.000104487 | -0.575252799 | -0.701444666 | -0.414382214 | 0.077165391  | brain innervation |
| ENSDART00000094727 | svopa              | 0.0001406   | -0.499297278 | -0.394465259 | 0.04106692   | 0.031976449  | brain innervation |
| ENSDART00000094840 | ralgs1             | 0.000405977 | -0.525377749 | -0.528705894 | -0.140236147 | 0.156796103  | brain innervation |
| ENSDART00000094859 | neurod6a           | 0.000108364 | -0.523659161 | -0.308368621 | 0.583701544  | 0.979244768  | brain innervation |
| ENSDART00000094919 | tmem91             | 2.12106E-05 | -0.661722152 | -0.699132453 | -0.1920109   | -0.057277853 | brain innervation |



|                    |                   |              |              |              |              |              |                   |
|--------------------|-------------------|--------------|--------------|--------------|--------------|--------------|-------------------|
| ENSDART0000099049  | NA                | 0.000503033  | -0.472159773 | -0.420532241 | -0.250637325 | -0.02437969  | brain innervation |
| ENSDART0000099283  | dalrd3            | 0.001372006  | -0.272196688 | -0.367831508 | -0.108158836 | 0.07067938   | brain innervation |
| ENSDART0000099325  | si:dkey-27p18.5   | 3.38347E-05  | -0.821017867 | -0.681399645 | -0.140207831 | 0.113491694  | brain innervation |
| ENSDART0000099607  | slc6a17           | 0.006359324  | -0.493487825 | -0.358976735 | -0.156955324 | 0.010739948  | brain innervation |
| ENSDART0000099872  | slc17a6b          | 0.000184957  | -0.645728405 | -0.242319052 | 0.108083805  | 0.273480994  | brain innervation |
| ENSDART0000099934  | kcncl1a           | 0.023562909  | -0.987934197 | -1.510396524 | -0.387995788 | 0.170469595  | brain innervation |
| ENSDART0000010022  | H2AFX (1 of many) | 0.004391006  | -0.512580891 | -0.39296931  | -0.220510282 | -0.111022185 | brain innervation |
| ENSDART00000100103 | acss2l            | 0.006451154  | -0.342716857 | -0.308956489 | -0.115247207 | 0.030743328  | brain innervation |
| ENSDART00000100322 | kcnh5b            | 4.91848E-05  | -0.532935362 | -0.444322241 | -0.174846578 | 0.219995697  | brain innervation |
| ENSDART00000100444 | fam19a5a          | 8.2583E-05   | -0.63242802  | -0.536601669 | -0.265992198 | 0.12320759   | brain innervation |
| ENSDART00000100596 | pcdh1a6           | 0.018324408  | -0.483816366 | -0.257584823 | -0.06041051  | 0.00168094   | brain innervation |
| ENSDART00000100658 | esrra             | 8.74195E-05  | -0.571475474 | -0.395296451 | 0.169003635  | 0.212368184  | brain innervation |
| ENSDART00000101658 | cttnbp2           | 0.001176693  | -0.40355339  | -0.391763552 | 0.009167842  | 0.081098     | brain innervation |
| ENSDART00000101070 | dachd             | 0.00434437   | -0.296270747 | -0.351582482 | -0.130791564 | -0.009393292 | brain innervation |
| ENSDART00000101134 | khdrbs2           | 0.003070422  | -0.661640499 | -0.469301828 | -0.265343985 | -0.029039929 | brain innervation |
| ENSDART00000101477 | emp1              | 0.0002611    | -0.241905322 | -0.037268798 | 0.203715295  | 0.377786296  | brain innervation |
| ENSDART00000101603 | kidins220b        | 0.004633928  | -0.01985848  | -0.087358266 | 0.173253678  | 0.374974923  | brain innervation |
| ENSDART00000101627 | IGLON5            | 0.000503033  | -0.423175903 | -0.742308046 | -0.313681293 | 0.102626627  | brain innervation |
| ENSDART00000101631 | satb1b            | 0.000172812  | -0.360112936 | -0.384116906 | 0.134197196  | 0.481946288  | brain innervation |
| ENSDART00000101653 | CU639469.1        | 2.18017E-05  | -0.529716959 | -0.505372118 | -0.050085906 | 0.195515782  | brain innervation |
| ENSDART00000101658 | ppp1r1b           | 0.001434846  | -0.639757199 | -0.267805539 | -0.098160681 | -0.228099263 | brain innervation |
| ENSDART00000102368 | grin1a            | 4.69744E-05  | -0.57807298  | -0.694484674 | -0.374619925 | 0.025284051  | brain innervation |
| ENSDART00000102455 | gucy1a3           | 0.001644836  | -0.52073984  | -0.506169014 | -0.27571082  | 0.101070807  | brain innervation |
| ENSDART00000102562 | ankrd10b          | 0.000614271  | -0.585231519 | -0.124121182 | 0.139197554  | 0.179030577  | brain innervation |
| ENSDART00000102782 | gria2a            | 0.000180202  | -0.472482927 | -0.595061919 | -0.203521695 | 0.050111807  | brain innervation |
| ENSDART00000103043 | nsfa              | 0.000872721  | -0.472055845 | -0.418381067 | -0.313792962 | -0.037512478 | brain innervation |
| ENSDART00000103151 | dlgap3            | 0.004847659  | -0.304185948 | -0.430889474 | -0.103996234 | 0.188728565  | brain innervation |
| ENSDART00000103407 | tmem245           | 0.001938223  | -0.353429601 | -0.331655767 | -0.089201446 | 0.066435984  | brain innervation |
| ENSDART00000103750 | fam131bb          | 0.000282529  | -0.555314971 | -0.519589863 | -0.143114917 | 0.156539518  | brain innervation |
| ENSDART00000104135 | gabrb5            | 1.15646E-05  | -0.398056951 | -0.510180941 | 0.262181183  | 0.751061332  | brain innervation |
| ENSDART00000104188 | igsf21b           | 0.000907455  | -0.476667576 | -0.274511883 | -0.073843861 | 0.013583331  | brain innervation |
| ENSDART00000104289 | rab3ab            | 0.00027551   | -0.744433679 | -0.710299004 | -0.400971594 | -0.021261155 | brain innervation |
| ENSDART00000104327 | vsx1              | 0.00488592   | -0.248525466 | -0.619641572 | -0.034766195 | -0.028538746 | brain innervation |
| ENSDART00000104751 | mx1               | 0.002350825  | -0.384587031 | -0.210909301 | 0.22179917   | 0.104111801  | brain innervation |
| ENSDART00000104895 | rgs7a             | 1.96612E-05  | -0.76773786  | -0.54211529  | -0.053731925 | 0.298916153  | brain innervation |
| ENSDART00000104933 | eepp1             | 0.033087133  | -0.181346781 | -0.362247495 | -0.01782264  | 0.011720383  | brain innervation |
| ENSDART00000104950 | atp1a3a           | 5.18727E-05  | -0.469887861 | -0.514207298 | -0.064097938 | 0.181102676  | brain innervation |
| ENSDART00000105484 | si:ch211-216b21.2 | 0.000149497  | -0.960990997 | -0.619204359 | -0.135410073 | 0.236742995  | brain innervation |
| ENSDART00000105588 | pcdh1b            | 0.006658285  | -0.246217756 | -0.446101289 | -0.039720059 | 0.09005245   | brain innervation |
| ENSDART00000105743 | ntng1a            | 0.000844413  | -0.262343031 | -0.343435025 | -0.06227485  | 0.248931143  | brain innervation |
| ENSDART00000105753 | olfm3a            | 0.008447718  | -0.365975807 | -0.465135675 | -0.139223772 | 0.043379292  | brain innervation |
| ENSDART00000105774 | ek1               | 0.000784035  | -0.422572147 | -0.621215995 | -0.219935537 | -0.023014864 | brain innervation |
| ENSDART00000105932 | si:dkeyp-110e4.11 | 6.00847E-05  | -0.775118699 | -0.662012678 | -0.111191342 | 0.348802036  | brain innervation |
| ENSDART00000106166 | rx1               | 0.002317622  | -1.001905061 | -0.358282402 | 0.191592029  | -0.031411117 | brain innervation |
| ENSDART00000106950 | nrm1a             | 0.000319291  | -1.225032386 | -1.272422646 | -0.361032349 | 0.032061464  | brain innervation |
| ENSDART00000108535 | gabrb1            | 0.000145808  | -1.10767094  | -1.249599593 | -0.238929019 | 0.417524871  | brain innervation |
| ENSDART00000108729 | adamts12          | 0.000110744  | -0.842317462 | -0.70962753  | 0.040474933  | 0.841307736  | brain innervation |
| ENSDART00000108736 | adam12            | 0.000825994  | -0.319460786 | -0.316431452 | 0.445307645  | 0.87790832   | brain innervation |
| ENSDART00000108808 | frem2a            | 6.41137E-06  | -0.381822233 | -0.539670066 | 0.662155423  | 0.974116851  | brain innervation |
| ENSDART00000108818 | arhgap32a         | 0.00053265   | -0.576365369 | -0.434660146 | -0.258610983 | 0.095307278  | brain innervation |
| ENSDART00000109029 | map6a             | 0.002736161  | -0.330392405 | -0.354970167 | -0.034172445 | 0.05340091   | brain innervation |
| ENSDART00000109040 | gpr158a           | 0.001331938  | -0.331785981 | -0.632662732 | -0.236983197 | 0.105308258  | brain innervation |
| ENSDART00000109243 | sema4bb           | 0.000494919  | -0.591195487 | -0.421350422 | -0.25044186  | -0.118505649 | brain innervation |
| ENSDART00000109356 | kif7a             | 0.000177237  | -0.7063233   | -0.659659661 | -0.044315321 | 0.157900055  | brain innervation |
| ENSDART00000109507 | RAP1GDS1          | 0.00047864   | -0.399835735 | -0.351308804 | 0.076766568  | 0.119897865  | brain innervation |
| ENSDART00000109511 | si:ch211-186j3.6  | 0.020586406  | -0.164289524 | -0.357536961 | -0.081167433 | 0.02827477   | brain innervation |
| ENSDART00000109568 | pip4k2ab          | 0.008492808  | -0.31785183  | -0.37156543  | -0.209120418 | 0.064881056  | brain innervation |
| ENSDART00000109833 | zmat3             | 0.001153184  | -0.462380241 | -0.737159777 | -0.151865097 | 0.090633241  | brain innervation |
| ENSDART00000110004 | frmpd3            | 0.000503033  | -0.530320903 | -0.511652794 | -0.387982186 | 0.071931622  | brain innervation |
| ENSDART00000110061 | spock2            | 0.000177237  | -0.746309396 | -0.624301954 | -0.158480844 | 0.116789254  | brain innervation |
| ENSDART00000110126 | cacng3b           | 0.000230274  | -0.394325343 | -0.354117689 | -0.012321564 | 0.185829622  | brain innervation |
| ENSDART00000110136 | ctnnap5b          | 0.000354446  | -0.584561492 | -0.553235513 | -0.330365654 | 0.070638148  | brain innervation |
| ENSDART00000110279 | si:dkey-183c6.8   | 0.000114847  | -0.455316373 | -0.174866477 | 0.555526708  | 0.790514442  | brain innervation |
| ENSDART00000110409 | frmd5             | 0.001654051  | -0.554751162 | -0.59840736  | -0.384150671 | 0.071106799  | brain innervation |
| ENSDART00000110503 | adam11            | 1.36144E-05  | -0.835498408 | -0.874358127 | 0.055154913  | 0.615136144  | brain innervation |
| ENSDART00000110590 | VSTM2B            | 0.0004543629 | -0.57346103  | -0.627600936 | -0.34222959  | -0.040178972 | brain innervation |
| ENSDART00000110679 | lrfn5b            | 2.98725E-05  | -0.958299909 | -0.447121499 | 0.131848444  | 0.317540452  | brain innervation |
| ENSDART00000110734 | FAM163A           | 0.001644836  | -0.371556039 | -0.423320211 | -0.272260914 | 0.021575603  | brain innervation |
| ENSDART00000110751 | tiam1a            | 3.21969E-05  | -0.473694473 | -0.373415926 | 0.157725394  | 0.265421677  | brain innervation |
| ENSDART00000111131 | elfn1b            | 0.001021091  | -1.012125284 | -0.755320746 | -0.301892543 | 0.27076153   | brain innervation |
| ENSDART00000111146 | si:ch211-26b3.4   | 0.000598789  | -0.414256231 | -0.420417531 | -0.178854692 | 0.040407002  | brain innervation |
| ENSDART00000111156 | pdp1              | 0.000503033  | -0.641430349 | -0.338633085 | -0.014499951 | 0.034332362  | brain innervation |
| ENSDART00000111203 | tagln3a           | 0.000536544  | -0.530904757 | -0.489741378 | -0.221881281 | -0.037658487 | brain innervation |
| ENSDART00000111301 | luzp2             | 0.000592988  | -0.629816567 | -0.548346899 | 0.040106065  | 0.088332731  | brain innervation |
| ENSDART00000111438 | mgea5             | 0.002109252  | -0.307275123 | -0.024811963 | 0.160874404  | 0.159343333  | brain innervation |

|                    |                    |             |              |              |              |              |                   |
|--------------------|--------------------|-------------|--------------|--------------|--------------|--------------|-------------------|
| ENSDART00000111506 | lrrc75ba           | 4.11188E-05 | -0.649545281 | -0.408918781 | -0.064365089 | 0.060080923  | brain innervation |
| ENSDART00000111535 | elfn1a             | 0.001460323 | -0.273088167 | -0.336173663 | -0.097567542 | 0.139029668  | brain innervation |
| ENSDART00000111639 | rereb              | 0.003012303 | -0.168137061 | -0.390988508 | -0.080335114 | 0.086629083  | brain innervation |
| ENSDART00000111642 | brinp3a.1          | 7.55931E-05 | -0.710663483 | -0.69660402  | -0.30207639  | -0.147819903 | brain innervation |
| ENSDART00000111948 | sez6l2             | 0.000199502 | -0.5142749   | -0.140866125 | 0.323444655  | 0.419947542  | brain innervation |
| ENSDART00000112003 | adgrb1a            | 0.00037001  | -0.32135813  | -0.631154823 | -0.317944877 | 0.097147786  | brain innervation |
| ENSDART00000112170 | unm_hu7912         | 0.000340312 | -0.404814593 | -0.573062573 | -0.192411138 | 0.071188401  | brain innervation |
| ENSDART00000112370 | ano11              | 1.45694E-05 | -1.080551268 | -1.39069517  | -0.608655336 | 0.046438031  | brain innervation |
| ENSDART00000112414 | rapgef5a           | 0.002098034 | -0.533059964 | -0.605979704 | -0.027243653 | 0.007460247  | brain innervation |
| ENSDART00000112484 | nlg2b              | 2.18017E-05 | -0.707313853 | -0.645741453 | -0.193542068 | 0.120518294  | brain innervation |
| ENSDART00000112546 | pkn3               | 0.017988416 | -0.415654116 | -0.225897422 | -0.124759806 | -0.079978695 | brain innervation |
| ENSDART00000112671 | bicd1a             | 0.000246292 | -0.391567366 | -0.28876668  | -0.040397452 | 0.195532163  | brain innervation |
| ENSDART00000112895 | FNDC10             | 3.90156E-05 | -0.46103084  | -0.039905964 | 0.379016706  | 0.57822448   | brain innervation |
| ENSDART00000113081 | gpr158b            | 4.77268E-06 | -0.777838913 | -0.859733549 | -0.109236002 | 0.425659764  | brain innervation |
| ENSDART00000113171 | nlg1               | 0.000370918 | -0.287475058 | -0.532070389 | -0.095767589 | 0.228264127  | brain innervation |
| ENSDART00000113502 | si:dkey-84j12.1    | 4.60467E-05 | -0.36232597  | -0.10430598  | 0.492332906  | 0.665079551  | brain innervation |
| ENSDART00000113511 | lzt51              | 0.000109579 | -1.206756297 | -0.713910989 | -0.061680884 | 0.474255612  | brain innervation |
| ENSDART00000113551 | trim2b             | 0.0245375   | -0.50417548  | -0.207383112 | -0.112448816 | 0.043074002  | brain innervation |
| ENSDART00000113773 | cdc42bpab          | 0.002362892 | -0.428966416 | -0.296406465 | 0.003528598  | 0.157857062  | brain innervation |
| ENSDART00000113796 | cacnb3b            | 1.63409E-06 | -1.378695476 | -1.717513295 | -0.09050578  | 0.468842834  | brain innervation |
| ENSDART00000113864 | faxca              | 0.000400485 | -0.531664025 | -0.191322961 | -0.005943785 | 0.107092327  | brain innervation |
| ENSDART00000113924 | lrrc7              | 0.000228698 | -0.537461037 | -0.585108204 | -0.303180727 | -0.024642369 | brain innervation |
| ENSDART00000113985 | mctp1a             | 0.000375747 | -0.392181593 | -0.510456941 | -0.185251742 | 0.106694132  | brain innervation |
| ENSDART00000114010 | slitrk3a           | 0.006522424 | -0.361859007 | -0.532282315 | -0.225491041 | 0.106517685  | brain innervation |
| ENSDART00000114267 | map6b              | 2.98725E-05 | -0.567896811 | -0.403955591 | 0.492985119  | 0.85461741   | brain innervation |
| ENSDART00000114432 | ntng2a             | 0.000596344 | -0.38146173  | -0.278136767 | -0.282818481 | 0.289761799  | brain innervation |
| ENSDART00000114448 | CHST8              | 0.000248091 | -0.44164787  | -0.464005415 | 0.047368929  | 0.426791372  | brain innervation |
| ENSDART00000114677 | si:ch73-62l21.1    | 0.007349533 | -0.323827666 | -0.531978643 | -0.239685061 | 0.043755156  | brain innervation |
| ENSDART00000114723 | rapgef11           | 0.020836881 | -0.431713581 | -0.430345279 | -0.085299154 | -0.113952199 | brain innervation |
| ENSDART00000114954 | rapgef5b           | 0.002739168 | -0.637101425 | -0.566396383 | -0.284127257 | 0.00714868   | brain innervation |
| ENSDART00000114959 | cdh24a             | 0.004579864 | -0.51153845  | -0.93145045  | -0.229616461 | 0.228723625  | brain innervation |
| ENSDART00000115027 | tmem151bb          | 0.000172675 | -0.856524713 | -0.708298022 | 0.291447963  | 0.495918048  | brain innervation |
| ENSDART00000115089 | zgc:171482         | 0.003451532 | -0.437080228 | -0.507022457 | -0.285662093 | 0.021798354  | brain innervation |
| ENSDART00000115141 | cacnb3b            | 0.000257119 | -1.10918155  | -1.536403603 | -0.203181521 | 0.418821499  | brain innervation |
| ENSDART00000115260 | si:ch211-113g11.6  | 0.005572285 | -0.558167113 | -1.193520332 | -0.037233796 | 0.533309069  | brain innervation |
| ENSDART00000121460 | prdm8b             | 0.00076978  | -0.383342673 | -0.361617984 | -0.117709411 | 0.067402978  | brain innervation |
| ENSDART00000121708 | pcsk1nl            | 0.000169466 | -0.536353064 | -0.421583117 | -0.086670577 | -0.06684806  | brain innervation |
| ENSDART00000121874 | nfasca             | 0.002178187 | -0.536181619 | -0.366142839 | -0.19557692  | -0.058427118 | brain innervation |
| ENSDART00000121913 | kctd12b            | 0.015495815 | -0.424186634 | -0.205906213 | -0.149727383 | -0.132895958 | brain innervation |
| ENSDART00000122037 | rbox1              | 0.000487998 | -0.419101241 | -0.392215043 | 0.102043249  | 0.360818016  | brain innervation |
| ENSDART00000122041 | nrcama             | 0.012857389 | -0.90531831  | -0.707479994 | -0.094699246 | 0.009754423  | brain innervation |
| ENSDART00000122099 | dynll2a            | 0.004627449 | -0.463212519 | -0.169502826 | -0.013591394 | 0.001709702  | brain innervation |
| ENSDART00000122101 | tbx2b              | 0.001190205 | -0.056468629 | 0.017248499  | 0.19422425   | 0.382938949  | brain innervation |
| ENSDART00000122389 | elmod1             | 3.77986E-05 | -0.62893484  | -0.673357812 | -0.159560027 | 0.32261476   | brain innervation |
| ENSDART00000122574 | ppp1r3aa           | 0.000793313 | -0.153287429 | -0.684598529 | 0.022675976  | 0.569399664  | brain innervation |
| ENSDART00000122905 | rac3b              | 0.000254175 | -0.501948401 | -0.363291367 | -0.120049924 | 0.166932504  | brain innervation |
| ENSDART00000123839 | arrb1              | 0.000512152 | -0.44263739  | -0.489445552 | -0.281663489 | 0.083496974  | brain innervation |
| ENSDART00000123851 | fut8b              | 0.013533882 | -0.379186004 | -0.673089848 | -0.195485297 | 0.141395943  | brain innervation |
| ENSDART00000123868 | dthd1              | 0.020324061 | -0.700427011 | -0.013611963 | -0.073941373 | -0.012612052 | brain innervation |
| ENSDART00000124112 | pou4f2             | 2.95145E-05 | -1.368026557 | -1.308261738 | 0.344262724  | 0.908586045  | brain innervation |
| ENSDART00000124331 | si:ch1073-174d20.1 | 0.000107168 | -0.948877018 | -0.570444361 | 0.133772468  | 0.53293925   | brain innervation |
| ENSDART00000124534 | mbnl2              | 0.001000183 | -0.407254222 | 0.078580914  | -0.044925118 | 0.120266311  | brain innervation |
| ENSDART00000124710 | dlg5a              | 0.003770761 | -0.356924394 | -0.265850728 | -0.130233283 | 0.096340819  | brain innervation |
| ENSDART00000124751 | kcnip3b            | 2.63402E-05 | -1.29606503  | -1.383048631 | -0.490749215 | -0.039127508 | brain innervation |
| ENSDART00000124827 | lgi2a              | 0.00013528  | -0.389885576 | -0.462014195 | -0.106597692 | 0.145509175  | brain innervation |
| ENSDART00000125045 | dscama             | 0.001138119 | -0.36310557  | -0.486996676 | -0.080151729 | 0.074065642  | brain innervation |
| ENSDART00000125074 | kcnab2b            | 0.001012163 | -0.745923366 | -1.091983107 | -0.420367552 | 0.000775062  | brain innervation |
| ENSDART00000125284 | nlg2a              | 0.000673063 | -0.210046545 | -0.366872132 | 0.090424981  | 0.163948503  | brain innervation |
| ENSDART00000125432 | esrrd              | 0.007748762 | -0.825323711 | -0.251243419 | -0.11920169  | -0.154136212 | brain innervation |
| ENSDART00000125450 | gpc1a              | 1.08487E-05 | -0.40101998  | -0.317779496 | 0.568583174  | 0.472068591  | brain innervation |
| ENSDART00000125536 | appb               | 0.000152384 | -0.473539223 | -0.363304525 | 0.075744005  | 0.226987466  | brain innervation |
| ENSDART00000125563 | homer3b            | 0.030075636 | -0.366344126 | -0.72350131  | -0.2232749   | 0.112901448  | brain innervation |
| ENSDART00000125638 | tbx5b              | 0.032861605 | -0.961612456 | -0.494056529 | -0.317150736 | -0.11065371  | brain innervation |
| ENSDART00000125733 | chst1              | 0.032601457 | -1.779723555 | -0.640531075 | -0.420086911 | -0.327548455 | brain innervation |
| ENSDART00000125759 | si:dkey-22o12.2    | 0.004657196 | -0.433562676 | -0.386370833 | -0.195481295 | -0.118191078 | brain innervation |
| ENSDART00000126640 | RHOBTB3            | 0.006456063 | -0.934122492 | -0.733675156 | -0.213973967 | -0.180952113 | brain innervation |
| ENSDART00000126744 | nrg3b              | 0.000370918 | -0.484773132 | -0.477903604 | -0.212248622 | 0.011007147  | brain innervation |
| ENSDART00000126766 | erbb4b             | 0.001365263 | -0.378985194 | -0.566156911 | -0.016423806 | 0.214915468  | brain innervation |
| ENSDART00000126945 | adgrb3             | 0.006975472 | -0.310129925 | -0.752937386 | -0.198981749 | -0.020103794 | brain innervation |
| ENSDART00000127047 | tusc5a             | 2.01848E-05 | -1.04192916  | -0.556828029 | 0.377559818  | 0.604205052  | brain innervation |
| ENSDART00000127136 | slco5a1b           | 0.039811839 | -0.145489914 | -0.411558687 | 0.007460079  | -0.021875568 | brain innervation |
| ENSDART00000127286 | si:ch73-140j24.4   | 6.73259E-05 | -0.467040467 | -0.569237917 | -0.172853738 | 0.202142114  | brain innervation |
| ENSDART00000128226 | slc6a11b           | 6.9873E-05  | -0.388946235 | -0.51506191  | -0.246391039 | 0.364300065  | brain innervation |
| ENSDART00000128271 | si:dkey-114c15.7   | 0.003693464 | -0.608254547 | -0.511435956 | -0.075108717 | 0.021034155  | brain innervation |
| ENSDART00000128302 | stk35              | 0.014339104 | -0.274652044 | -0.340334252 | -0.095489621 | 0.00314331   | brain innervation |

|                    |                    |             |              |              |              |              |                   |
|--------------------|--------------------|-------------|--------------|--------------|--------------|--------------|-------------------|
| ENSDART00000128690 | agap3              | 0.009899954 | -0.218144691 | -0.339443752 | 0.012538674  | 0.008782978  | brain innervation |
| ENSDART00000128705 | ndrg3a             | 0.000135332 | -0.684036937 | -0.148509308 | 0.416765356  | 0.500717941  | brain innervation |
| ENSDART00000128794 | gpm6ab             | 0.000948605 | -0.753205656 | -0.206704843 | 0.388986514  | 0.547688547  | brain innervation |
| ENSDART00000128839 | fez1               | 0.000920284 | -0.463224643 | -0.323499809 | -0.160691051 | 0.039189596  | brain innervation |
| ENSDART00000129055 | nrg2b              | 0.00309942  | -0.525587506 | -0.415280837 | -0.153878493 | 0.206094594  | brain innervation |
| ENSDART00000129248 | clstn1             | 0.000984416 | -0.435055335 | -0.404808779 | -0.072836605 | 0.145009995  | brain innervation |
| ENSDART00000129511 | robo2              | 6.11958E-05 | -0.431501059 | -0.512946091 | -0.075617078 | 0.250070953  | brain innervation |
| ENSDART00000129559 | btbd3b             | 0.000261206 | -0.741839183 | -0.720572279 | -0.364214548 | 0.15940566   | brain innervation |
| ENSDART00000129819 | si:ch211-151p13.8  | 0.000362487 | -0.477854058 | -0.665734365 | -0.328239319 | -0.007548317 | brain innervation |
| ENSDART00000129834 | nat16              | 0.000882713 | -0.654571013 | -0.560511117 | -0.238004357 | -0.212203603 | brain innervation |
| ENSDART00000129866 | pcsk2              | 0.000314849 | -0.608807617 | -0.601188495 | -0.114458443 | 0.092104737  | brain innervation |
| ENSDART00000129910 | tmem240a           | 0.000995127 | -0.628384792 | -0.334786051 | 0.214415995  | 0.163191044  | brain innervation |
| ENSDART00000129924 | hmgb3a             | 0.001276923 | -0.441161001 | -0.289631714 | 0.049371785  | 0.069315625  | brain innervation |
| ENSDART00000130007 | GABRA2 (1 of many) | 7.10385E-05 | -0.583670012 | -0.533882123 | -0.170964807 | 0.218833255  | brain innervation |
| ENSDART00000130103 | kctd16a            | 1.73574E-05 | -0.864638484 | -0.862435538 | 0.056246994  | 0.316558654  | brain innervation |
| ENSDART00000130125 | gnao1a             | 0.000604807 | -0.213616659 | -0.159180808 | 0.167107834  | 0.384555308  | brain innervation |
| ENSDART00000130310 | epb413a            | 0.00059038  | -0.373985055 | -0.254132145 | 0.194766582  | 0.26124696   | brain innervation |
| ENSDART00000130573 | atp6ap1a           | 0.001946729 | -0.419066331 | -0.227150493 | -0.139216735 | 0.064701891  | brain innervation |
| ENSDART00000131075 | dusp23b            | 0.033109676 | -0.349967426 | -0.590231643 | 0.026826234  | -0.132825162 | brain innervation |
| ENSDART00000131126 | bcl6a              | 0.005688069 | -0.096649799 | -0.044696983 | 0.295011601  | 0.436349263  | brain innervation |
| ENSDART00000131143 | sept5b             | 0.000106562 | -0.480326507 | -0.332562488 | 0.283118689  | 0.526750102  | brain innervation |
| ENSDART00000131579 | ptprdb             | 7.68811E-06 | -0.516674931 | -0.642051878 | 0.273217974  | 0.528486925  | brain innervation |
| ENSDART00000131714 | mbnl2              | 0.008848885 | -0.406601788 | -0.032543807 | -0.091713267 | 0.092369986  | brain innervation |
| ENSDART00000131736 | kcnq2a             | 2.08005E-05 | -0.749729315 | -0.34933354  | 0.575885203  | 0.723193716  | brain innervation |
| ENSDART00000132027 | spock2             | 0.000219336 | -0.61060119  | -0.435727551 | -0.163124474 | 0.204372495  | brain innervation |
| ENSDART00000132123 | thsd7ba            | 0.001248576 | -0.490674171 | -0.551076996 | -0.028899921 | -0.007032812 | brain innervation |
| ENSDART00000132278 | rnf144ab           | 0.012297973 | -0.480742338 | -0.392838261 | -0.157627213 | -0.112649454 | brain innervation |
| ENSDART00000132294 | fut8a              | 0.003138642 | -0.131220853 | -0.116575506 | 0.125377151  | 0.342318079  | brain innervation |
| ENSDART00000132342 | kiaa1549lb         | 0.011357239 | -0.30776123  | -0.485143208 | -0.118054479 | 0.086040071  | brain innervation |
| ENSDART00000132471 | csm2               | 6.2134E-05  | -0.459001483 | -0.911607393 | -0.371722747 | 0.062349627  | brain innervation |
| ENSDART00000132543 | klhd8c8b           | 0.004230106 | -0.423366405 | -0.574887213 | -0.139148992 | -0.034877401 | brain innervation |
| ENSDART00000132583 | nrxn2a             | 0.001331938 | -0.296541609 | -0.578930697 | -0.085512446 | 0.138469202  | brain innervation |
| ENSDART00000132685 | kcnm1b             | 0.00155515  | -1.625205585 | -1.495755896 | -0.13719571  | 0.28532188   | brain innervation |
| ENSDART00000132691 | adgrb3             | 0.007781888 | -0.413275118 | -0.450913383 | -0.19602447  | 0.067293319  | brain innervation |
| ENSDART00000132930 | pcb3               | 0.000849348 | -0.89548835  | -0.955377646 | -0.326630607 | 0.075971616  | brain innervation |
| ENSDART00000133092 | st6galnac5a        | 0.000503033 | -0.798487612 | -0.408716424 | -0.156113795 | 0.220161008  | brain innervation |
| ENSDART00000133223 | COQ10A             | 0.001579476 | -0.381890626 | -0.12435669  | 0.152677483  | 0.108453147  | brain innervation |
| ENSDART00000133330 | fam214b            | 0.006799542 | -0.307417712 | -0.32820559  | -0.047756819 | 0.003374146  | brain innervation |
| ENSDART00000133385 | lrp1ba             | 0.000155554 | -0.614935587 | -0.929322267 | -0.360685611 | 0.193952764  | brain innervation |
| ENSDART00000133504 | dab2ipb            | 0.019374625 | -0.309610082 | -0.535236809 | -0.062134515 | 0.075905091  | brain innervation |
| ENSDART00000133956 | phacr3a            | 0.000149865 | -0.466148377 | -0.040906797 | 0.400008422  | 0.572153181  | brain innervation |
| ENSDART00000133985 | kcmd1              | 0.000248125 | -1.187342293 | -1.392518344 | -0.747443213 | -0.002522665 | brain innervation |
| ENSDART00000134035 | cntnap5b           | 0.005466942 | -1.01200416  | -1.154440105 | -0.403471674 | 0.139198923  | brain innervation |
| ENSDART00000134261 | dnm1b              | 1.07133E-05 | -0.433650537 | -0.451510325 | 0.138870574  | 0.465815695  | brain innervation |
| ENSDART00000134307 | dclk1a             | 0.001654051 | -1.448196855 | -0.41548572  | -0.010990365 | -0.586401585 | brain innervation |
| ENSDART00000134475 | gdap1              | 0.004885039 | -0.459369959 | -0.408869462 | -0.283212336 | -0.008346648 | brain innervation |
| ENSDART00000134564 | srsf5b             | 0.01711161  | -0.27445076  | -0.31745813  | -0.113899297 | -0.080138136 | brain innervation |
| ENSDART00000134715 | elmod1             | 5.02856E-05 | -1.115600356 | -1.115324879 | -0.105456948 | 0.485174818  | brain innervation |
| ENSDART00000134722 | bcl2l13            | 0.00372102  | -0.594192147 | -0.544774096 | -0.184876076 | -0.124896832 | brain innervation |
| ENSDART00000134816 | slc2a3a            | 0.00067643  | -0.406786727 | -0.444029943 | -0.052958142 | 0.129218418  | brain innervation |
| ENSDART00000134832 | rbpms2b            | 0.003328957 | -1.576691045 | -2.099790887 | -0.701820765 | 0.187979586  | brain innervation |
| ENSDART00000134855 | efr3bb             | 0.003310987 | -0.263384976 | -0.381748192 | -0.1453091   | 0.002074194  | brain innervation |
| ENSDART00000134973 | pcnxl2             | 7.10385E-05 | -0.772294262 | -0.54715302  | -0.00593982  | 0.313205165  | brain innervation |
| ENSDART00000135052 | slc8a4a            | 0.003870205 | -0.449869312 | -0.676457859 | -0.284767037 | 0.064060964  | brain innervation |
| ENSDART00000135284 | vsnl1a             | 3.95966E-05 | -0.802778535 | -0.782046001 | -0.520311896 | -0.04073792  | brain innervation |
| ENSDART00000135475 | cadm2a             | 0.000283607 | -0.589549243 | -0.825400299 | -0.33568035  | 0.065563209  | brain innervation |
| ENSDART00000135513 | rgs6               | 0.001782169 | -0.368608418 | -0.140264684 | -0.010741291 | 0.084818744  | brain innervation |
| ENSDART00000135602 | si:ch73-290k24.6   | 0.008047992 | -0.456455854 | -0.524968049 | -0.128888416 | -0.002715321 | brain innervation |
| ENSDART00000135624 | FAM163A            | 0.011945865 | -0.714036121 | -0.427639458 | -0.142310427 | 0.163241634  | brain innervation |
| ENSDART00000135692 | UNC13A             | 0.006141198 | -0.209420413 | -0.513653337 | -0.217224189 | 0.093101705  | brain innervation |
| ENSDART00000135702 | rgs11              | 0.000709831 | -0.576481143 | -0.793334647 | -0.383725367 | 0.048951277  | brain innervation |
| ENSDART00000135715 | fam184a            | 0.000322759 | -0.344643213 | -0.481218539 | -0.282456424 | 0.057932244  | brain innervation |
| ENSDART00000135764 | si:dkey-70p6.1     | 0.000167073 | -0.54777588  | -0.724047584 | 0.062614493  | 0.292769909  | brain innervation |
| ENSDART00000135768 | lrp1ba             | 4.91848E-05 | -0.685782746 | -0.945707299 | -0.285013804 | 0.195853428  | brain innervation |
| ENSDART00000135811 | atp2b3a            | 0.000535509 | -0.361290503 | -0.436904447 | -0.166639435 | 0.060424957  | brain innervation |
| ENSDART00000136123 | kdm6bb             | 0.024284969 | -0.32427763  | -0.244056677 | -0.170049978 | -0.028150527 | brain innervation |
| ENSDART00000136154 | gpr158a            | 0.014511767 | -0.522434846 | -0.680761714 | -0.064607745 | -0.081447185 | brain innervation |
| ENSDART00000136233 | TENM3              | 2.33589E-05 | -0.571502608 | -0.593065001 | 0.242250375  | 0.436842415  | brain innervation |
| ENSDART00000136269 | rmbp2              | 0.016247803 | -0.196271668 | -0.410552217 | -0.160743106 | 0.064316711  | brain innervation |
| ENSDART00000136488 | zmat4a             | 0.008573382 | -0.690962776 | -0.637104526 | -0.28999313  | -0.088561559 | brain innervation |
| ENSDART00000136578 | syn1               | 4.91848E-05 | -0.141221338 | -0.191909782 | 0.363564902  | 0.481540125  | brain innervation |
| ENSDART00000136708 | rbpms2b            | 1.12792E-05 | -1.024689498 | -0.80090545  | -0.103078191 | 0.159293341  | brain innervation |
| ENSDART00000136754 | cdh13              | 0.000634488 | -0.587587145 | -0.627840519 | -0.172128457 | 0.142910694  | brain innervation |
| ENSDART00000136759 | prdm13             | 0.00326136  | -0.225066145 | -0.413438688 | -0.129520305 | 0.036146962  | brain innervation |
| ENSDART00000137037 | iqsec3b            | 0.006778044 | -0.405090433 | -0.576572578 | -0.30180595  | 0.030413937  | brain innervation |

|                    |                   |             |              |              |              |              |                   |
|--------------------|-------------------|-------------|--------------|--------------|--------------|--------------|-------------------|
| ENSDART00000137353 | klhl17            | 0.00053559  | -0.368352542 | -0.314849207 | -0.039056928 | 0.155772163  | brain innervation |
| ENSDART00000137355 | tet3              | 0.033062691 | -0.245273707 | -0.407219331 | -0.050664281 | -0.06569376  | brain innervation |
| ENSDART00000137756 | hecw2a            | 3.29362E-06 | -0.728856656 | -1.003560302 | -0.22088311  | 0.383324077  | brain innervation |
| ENSDART00000137889 | ank1b             | 0.002868986 | -0.447220804 | -0.737203628 | 0.205089912  | 0.418795119  | brain innervation |
| ENSDART00000137900 | grin2ab           | 2.59942E-05 | -0.452993272 | -0.616161489 | 0.576592075  | 1.050321835  | brain innervation |
| ENSDART00000138048 | pbx3b             | 0.007841242 | -0.599655595 | -0.602159282 | -0.228775798 | -0.019503135 | brain innervation |
| ENSDART00000138294 | rab41             | 0.000446102 | -0.246606124 | -0.179576466 | 0.274617961  | 0.438688085  | brain innervation |
| ENSDART00000138540 | ttyh1             | 5.26677E-05 | -0.563796304 | -0.437755604 | -0.092270149 | 0.165178407  | brain innervation |
| ENSDART00000138695 | ank1b             | 0.000591348 | -0.498943842 | -0.553539638 | -0.03799849  | 0.33423854   | brain innervation |
| ENSDART00000138834 | mab21l3           | 0.00420635  | -0.591171056 | -0.506133859 | -0.165242719 | -0.104286764 | brain innervation |
| ENSDART00000138850 | cacna2d2b         | 0.008428026 | -0.226630579 | -0.433395437 | -0.06209639  | 0.11961013   | brain innervation |
| ENSDART00000139035 | si:ch211-215c18.3 | 1.2512E-05  | -1.205532305 | -0.512285433 | 0.437440349  | 0.984798646  | brain innervation |
| ENSDART00000139178 | slc25a14          | 0.001193104 | -0.405048408 | -0.151865564 | -0.020130795 | 0.082212943  | brain innervation |
| ENSDART00000139265 | si:ch211-12e13.12 | 0.00026634  | -0.4797238   | -0.27645528  | 0.604278273  | 0.83384752   | brain innervation |
| ENSDART00000139279 | rbpms2b           | 0.001175355 | -0.774960547 | -0.830410704 | 0.12323811   | 0.508122144  | brain innervation |
| ENSDART00000139448 | GALNTL6           | 0.000882263 | -0.494238764 | -0.383984121 | -0.129586789 | 0.079582323  | brain innervation |
| ENSDART00000139475 | samd10b           | 0.001021091 | -0.569533963 | -0.524261904 | -0.125238267 | -0.046566236 | brain innervation |
| ENSDART00000139493 | olfm1b            | 0.002701643 | -0.400757951 | -0.50188464  | -0.148663949 | 0.07973127   | brain innervation |
| ENSDART00000139514 | ano11             | 0.001023352 | -1.063704055 | -1.17363318  | -0.628817004 | -0.055546726 | brain innervation |
| ENSDART00000139795 | syt2a             | 7.6604E-05  | -0.704240682 | -0.905957314 | -0.438675098 | 0.054000022  | brain innervation |
| ENSDART00000139841 | gabrb1            | 0.000278329 | -0.439523493 | -0.431067027 | -0.18481289  | 0.263500104  | brain innervation |
| ENSDART00000139954 | BX005364.1        | 0.014034602 | -0.374788931 | -0.616534875 | -0.121001872 | 0.068005074  | brain innervation |
| ENSDART00000140161 | necab2            | 2.33589E-05 | -0.820451686 | -0.597146212 | 0.232199679  | 0.59216621   | brain innervation |
| ENSDART00000140365 | slc12a5b          | 0.002585408 | -0.506920714 | -0.535232712 | -0.246533716 | 0.015331251  | brain innervation |
| ENSDART00000140436 | map2              | 0.004423084 | -0.405615536 | -0.195771527 | -0.230781013 | 0.041022881  | brain innervation |
| ENSDART00000140476 | atp6v0a2a         | 0.000363306 | -0.389741082 | 0.011917076  | 0.174652763  | 0.265809184  | brain innervation |
| ENSDART00000140575 | map4l             | 0.032473859 | -0.647123698 | -0.438384786 | -0.184748643 | -0.024632978 | brain innervation |
| ENSDART00000140739 | lrrc4bb           | 0.029601456 | -0.565179268 | -0.464872302 | -0.152447222 | -0.079782637 | brain innervation |
| ENSDART00000140827 | bcl11ab           | 0.000602987 | -0.293093875 | -0.330078462 | 0.796150714  | 1.216507448  | brain innervation |
| ENSDART00000141086 | robo2             | 0.010303026 | -0.237929535 | -0.432116468 | -0.02855362  | 0.131332743  | brain innervation |
| ENSDART00000141103 | gfra4a            | 0.0021138   | -0.446789167 | -0.472299982 | -0.170582645 | 0.04427624   | brain innervation |
| ENSDART00000141752 | asphd1            | 0.007785924 | -0.390703626 | -0.359372328 | -0.291984856 | 0.011586147  | brain innervation |
| ENSDART00000141779 | fndc5a            | 0.000119544 | -1.597130885 | -1.939288998 | -0.836516829 | 0.004414498  | brain innervation |
| ENSDART00000141917 | ank1a             | 3.03667E-05 | -1.167872922 | -1.059135645 | -0.600851313 | -0.041118915 | brain innervation |
| ENSDART00000141958 | cdh24a            | 0.005763869 | -0.328998631 | -0.596758779 | -0.216164592 | 0.127161048  | brain innervation |
| ENSDART00000142061 | si:dkey-32e23.4   | 0.001867076 | -0.369490073 | -0.293305321 | 0.04108125   | 0.132687244  | brain innervation |
| ENSDART00000142087 | foxp2             | 0.000565675 | -0.522019738 | -0.41942621  | 0.065656049  | 0.27497631   | brain innervation |
| ENSDART00000142122 | cplx2l            | 0.000340549 | -1.429903189 | -0.89072761  | 0.133226492  | 0.114783163  | brain innervation |
| ENSDART00000142140 | ppfia2            | 0.001332606 | -0.37587085  | -0.48411577  | 0.218087957  | 0.20796301   | brain innervation |
| ENSDART00000142141 | grin2aa           | 0.000227894 | -0.499492643 | -0.789969038 | -0.312539264 | 0.08079802   | brain innervation |
| ENSDART00000142489 | slco5a1b          | 0.001879617 | -0.38890355  | -0.329924623 | -0.120653024 | -0.00920305  | brain innervation |
| ENSDART00000142524 | chrnb2a           | 9.33064E-06 | -0.869143617 | -0.99350722  | -0.040693199 | 0.426386933  | brain innervation |
| ENSDART00000142653 | grm1a             | 0.003262292 | -0.469462455 | -0.467735907 | -0.088400916 | 0.178280203  | brain innervation |
| ENSDART00000143152 | cpne5a            | 0.000387877 | -0.664046359 | -0.825602355 | -0.316663455 | 0.050239809  | brain innervation |
| ENSDART00000143286 | lnx1              | 0.005464372 | -0.74422542  | -0.772813048 | -0.069056217 | 0.13158415   | brain innervation |
| ENSDART00000143410 | EMB               | 2.1041E-05  | -1.826210099 | -1.592080235 | -0.486327336 | 0.178400158  | brain innervation |
| ENSDART00000143938 | sema3ga           | 0.000230274 | 0.034230149  | -0.448431565 | 0.102011548  | 0.447499442  | brain innervation |
| ENSDART00000143969 | BX247868.1        | 6.23756E-05 | -1.179119979 | -1.430780681 | -0.233116942 | 0.342359274  | brain innervation |
| ENSDART00000144050 | NA                | 0.025646401 | -0.572877113 | -0.701246998 | -0.196460214 | -0.040487474 | brain innervation |
| ENSDART00000144186 | pou6f2            | 7.05055E-05 | -0.474463335 | -0.465571046 | 0.092941552  | 0.436081081  | brain innervation |
| ENSDART00000144215 | pcnxl2            | 1.45694E-05 | -0.697249288 | -0.448197444 | 0.040412938  | 0.382373048  | brain innervation |
| ENSDART00000144361 | ank1b             | 2.46332E-05 | -0.731673078 | -0.825040806 | 0.086374477  | 0.310723345  | brain innervation |
| ENSDART00000144894 | bcl11ba           | 3.52427E-05 | -0.656989822 | -0.679320488 | 0.181338486  | 0.623847694  | brain innervation |
| ENSDART00000145096 | fam219ab          | 0.007936937 | -0.366547695 | -0.337752539 | -0.191344563 | -0.015845187 | brain innervation |
| ENSDART00000145108 | MFF (1 of many)   | 0.004863057 | -0.387524941 | -0.341112286 | -0.251149344 | -0.013627184 | brain innervation |
| ENSDART00000145114 | ptprsa            | 0.011196176 | -0.133739633 | -0.353332073 | -0.057919239 | 0.041724305  | brain innervation |
| ENSDART00000145434 | gpr52             | 0.010169943 | -0.413465096 | -0.575440094 | -0.276023467 | -0.017738845 | brain innervation |
| ENSDART00000145489 | ano11             | 0.000184045 | -1.065264341 | -1.355279668 | -0.34443399  | 0.075205433  | brain innervation |
| ENSDART00000145616 | adarb1b           | 8.45506E-05 | -0.549552658 | -0.593167659 | -0.056719481 | 0.082749855  | brain innervation |
| ENSDART00000145775 | mpp4a             | 0.007561534 | -0.462462268 | -0.206618846 | -0.102159961 | 0.056169031  | brain innervation |
| ENSDART00000145777 | adgrb3            | 0.018611393 | -0.131394962 | -0.455026919 | -0.13584478  | 0.067074927  | brain innervation |
| ENSDART00000145809 | prkag3a           | 0.029695868 | -4.153185554 | -1.353616268 | -0.923701192 | -0.043754788 | brain innervation |
| ENSDART00000145835 | tmx3              | 0.000403881 | -0.913440216 | 0.029499449  | 0.308787653  | 0.34181057   | brain innervation |
| ENSDART00000146055 | ptchd4            | 6.99374E-05 | -0.534340079 | -0.556417786 | 0.177414073  | 0.199962898  | brain innervation |
| ENSDART00000146120 | luzp2             | 0.000370918 | -0.491780393 | -0.439244253 | 0.071649151  | 0.105029542  | brain innervation |
| ENSDART00000146132 | si:ch211-254n4.3  | 0.000799784 | -0.407187074 | -0.522964952 | -0.215771966 | 0.042955183  | brain innervation |
| ENSDART00000146530 | epha6             | 0.000442465 | -0.320688922 | -0.528894361 | -0.185025461 | 0.089827402  | brain innervation |
| ENSDART00000146785 | tmem163b          | 2.46332E-05 | -0.68540579  | -0.770110571 | -0.115396875 | 0.356833449  | brain innervation |
| ENSDART00000147001 | si:dkeyp-72h1.1   | 0.00059038  | -0.667988087 | -0.713655804 | -0.172938308 | 0.232582151  | brain innervation |
| ENSDART00000147105 | tdh               | 0.003138642 | -0.645059373 | -0.498416454 | -0.202501341 | -0.068176647 | brain innervation |
| ENSDART00000147188 | trpm3             | 0.001151232 | -0.625119804 | -0.737554924 | -0.108574358 | 0.285413653  | brain innervation |
| ENSDART00000147218 | efna3a            | 0.00377485  | -0.67967128  | -0.850928012 | -0.177104508 | -0.025688419 | brain innervation |
| ENSDART00000147464 | ryr3              | 4.24705E-05 | -0.823352364 | -0.716491782 | 0.05941278   | 0.608108075  | brain innervation |
| ENSDART00000147483 | ephb6             | 0.000402225 | -0.346946617 | -0.195722816 | 0.204471928  | 0.396713027  | brain innervation |
| ENSDART00000147699 | mical3b           | 0.021599545 | 0.112525626  | 0.108456465  | 0.226887131  | 0.765699718  | brain innervation |

|                    |                      |             |              |              |              |              |                   |
|--------------------|----------------------|-------------|--------------|--------------|--------------|--------------|-------------------|
| ENSDART00000147799 | ndrg3b               | 0.015070633 | -0.751369578 | -0.184479497 | 0.170135881  | -0.060187322 | brain innervation |
| ENSDART00000147831 | ACAP2 (1 of many)    | 0.000728778 | -0.265239588 | -0.086744823 | 0.171263201  | 0.342225898  | brain innervation |
| ENSDART00000147998 | plxna2               | 0.007335615 | -0.136413264 | -0.347150332 | -0.077394761 | 0.05783618   | brain innervation |
| ENSDART00000148055 | si:ch211-67e16.11    | 0.000248091 | -0.532227459 | -0.535880084 | -0.161015502 | 0.246252593  | brain innervation |
| ENSDART00000148107 | SRCIN1               | 5.24617E-05 | -0.358492187 | -0.594267639 | -0.130298738 | 0.102935385  | brain innervation |
| ENSDART00000148120 | ephb2a               | 5.7178E-05  | -0.204590684 | -0.196760275 | 0.359222548  | 0.385663441  | brain innervation |
| ENSDART00000148199 | stxbp1a              | 0.002936628 | -0.541285454 | -0.573795052 | -0.292066803 | -0.020658402 | brain innervation |
| ENSDART00000148405 | si:ch211-113g11.6    | 0.005927492 | -0.63339569  | -0.861477951 | -0.083811842 | 0.259008105  | brain innervation |
| ENSDART00000148465 | slc1a1               | 3.38347E-05 | -0.751249091 | -0.22594806  | 0.456533505  | 0.753777978  | brain innervation |
| ENSDART00000148580 | BX005108.2           | 0.002349998 | -0.474486107 | -0.575204555 | -0.246024325 | -0.012613897 | brain innervation |
| ENSDART00000148590 | coro2ba              | 0.007621679 | -0.3608902   | -0.079968694 | -0.141782791 | 0.048751465  | brain innervation |
| ENSDART00000148653 | tmem145              | 0.019023689 | -0.454635973 | -0.21216688  | -0.078241248 | 0.035128268  | brain innervation |
| ENSDART00000148662 | kncnc3a              | 0.003848394 | -0.800710128 | -1.106624714 | -0.368118634 | 0.013489304  | brain innervation |
| ENSDART00000148900 | kncnc2               | 0.002497064 | -0.819802341 | -0.972756522 | -0.275729768 | 0.337871594  | brain innervation |
| ENSDART00000149032 | oat                  | 0.006013085 | -0.368235431 | -0.40939103  | -0.17630927  | -0.009811502 | brain innervation |
| ENSDART00000149158 | dmxl2                | 0.001023352 | -0.239475556 | -0.38571718  | -0.12120231  | 0.150747303  | brain innervation |
| ENSDART00000149175 | pou4f3               | 3.33896E-05 | -1.520089487 | -1.231379123 | 0.357488642  | 0.743891028  | brain innervation |
| ENSDART00000149276 | lzt3b                | 0.009414182 | -0.642406039 | -0.470964243 | -0.143114993 | -0.054979203 | brain innervation |
| ENSDART00000149283 | zgc:112001           | 0.000242559 | -0.707617666 | -0.492468931 | 0.006563399  | 0.231921747  | brain innervation |
| ENSDART00000149335 | kca1a                | 7.55931E-05 | -0.92291358  | -0.966385056 | -0.49989391  | -0.001249229 | brain innervation |
| ENSDART00000149367 | si:ch73-290k24.5     | 0.009217803 | -0.213839599 | -0.466705261 | -0.018322662 | 0.130528894  | brain innervation |
| ENSDART00000149425 | SLC25A22 (1 of many) | 0.000236845 | -0.428786809 | -0.626535356 | -0.125118952 | 0.12464047   | brain innervation |
| ENSDART00000149443 | pcdh19               | 0.000181327 | -0.547618951 | -0.594468642 | -0.345755383 | 0.11053464   | brain innervation |
| ENSDART00000149552 | FP325120.1           | 0.00320961  | -0.456523138 | -0.25356238  | -0.125718739 | 0.024031302  | brain innervation |
| ENSDART00000149618 | mid1                 | 0.002670678 | -0.406831126 | -0.160364287 | 0.131354752  | 0.136351442  | brain innervation |
| ENSDART00000149666 | dock3                | 0.004782655 | -0.065088232 | -0.425598201 | -0.009057049 | 0.161364952  | brain innervation |
| ENSDART00000149685 | gnao1a               | 0.000111916 | -0.290173142 | -0.321971232 | 0.118032615  | 0.301423091  | brain innervation |
| ENSDART00000149740 | si:ch211-149b19.2    | 0.000439231 | -0.851560484 | -0.688459713 | 0.123433485  | 0.442881876  | brain innervation |
| ENSDART00000149859 | gldn                 | 0.020986271 | -0.670802099 | -0.540937826 | -0.034323087 | -0.157128438 | brain innervation |
| ENSDART00000149947 | bcl2b                | 0.000305619 | -0.663523207 | -0.706570637 | -0.112082166 | -0.007869569 | brain innervation |
| ENSDART00000149992 | si:dkey-231j24.3     | 0.002102775 | -0.792591394 | -0.543368341 | 0.065178142  | 0.204406436  | brain innervation |
| ENSDART00000150036 | adam23a              | 3.77986E-05 | -0.26166293  | -0.515362417 | 0.016147076  | 0.303932596  | brain innervation |
| ENSDART00000150068 | sox6                 | 0.001331938 | -0.111707858 | -0.047191704 | 0.355284385  | 0.700337568  | brain innervation |
| ENSDART00000150146 | smarcd3b             | 0.000677616 | -0.318612181 | -0.278781268 | 0.723080439  | 0.640333876  | brain innervation |
| ENSDART00000150839 | fam57bb              | 0.005203275 | -0.627521697 | -0.387137362 | 0.25664183   | 0.060693872  | brain innervation |
| ENSDART00000150949 | nfyf                 | 0.013743075 | -0.535274529 | -0.301463031 | -0.212807295 | 0.074596031  | brain innervation |
| ENSDART00000150955 | bmpr2a               | 0.012462623 | -0.667543016 | -0.436786519 | -0.136898455 | 0.053141678  | brain innervation |
| ENSDART00000151252 | myo10l1              | 3.38347E-05 | -0.09485067  | -0.323915115 | 0.494165668  | 0.855040148  | brain innervation |
| ENSDART00000151299 | scn8ab               | 1.02827E-05 | -0.339946061 | -0.372438378 | 0.28752079   | 0.526264643  | brain innervation |
| ENSDART00000151571 | ahdc1                | 0.000666959 | -0.753523402 | -0.774930454 | -0.265860844 | -0.025283973 | brain innervation |
| ENSDART00000151648 | ntng2b               | 0.000275413 | -0.44606387  | -0.406664301 | -0.175135105 | 0.111487092  | brain innervation |
| ENSDART00000151672 | si:ch211-276a17.5    | 0.026710645 | -0.716987346 | -0.427751363 | -0.201345778 | -0.037618143 | brain innervation |
| ENSDART00000151674 | pcdh9                | 0.000894529 | -0.204552278 | -0.440082629 | -0.022873178 | 0.221939437  | brain innervation |
| ENSDART00000151685 | lhfp14a              | 0.000326965 | -0.450299252 | -0.419390296 | -0.093062661 | 0.17106537   | brain innervation |
| ENSDART00000151698 | syf3                 | 0.000157185 | -0.467556628 | -0.536044497 | -0.128625894 | 0.106551311  | brain innervation |
| ENSDART00000151842 | lrrn3a               | 2.01848E-05 | -0.579197629 | -0.548770022 | -0.143313453 | 0.249550285  | brain innervation |
| ENSDART00000151853 | btbd10a              | 0.000362175 | -0.220795221 | -0.048228521 | 0.169228662  | 0.338815973  | brain innervation |
| ENSDART00000151904 | foxn3                | 0.000466769 | -0.402174688 | -0.533042351 | -0.141780798 | 0.022724604  | brain innervation |
| ENSDART00000151915 | ptchd1               | 6.75287E-05 | -0.713611001 | -0.66822522  | 0.042208909  | 0.328774722  | brain innervation |
| ENSDART00000151920 | si:ch211-140m22.7    | 0.011455954 | -0.371308279 | -0.473110833 | -0.103450206 | 0.052557108  | brain innervation |
| ENSDART00000151921 | dnmt3ab              | 0.001890284 | -0.131014471 | -0.104325638 | 0.10563751   | 0.340310238  | brain innervation |
| ENSDART00000151970 | si:ch211-248l17.3    | 0.000139914 | -0.372087768 | -0.337523565 | 0.171433041  | 0.720267147  | brain innervation |
| ENSDART00000152011 | DOCK4 (1 of many)    | 0.000227894 | -0.107148853 | -0.150156526 | 0.321338768  | 0.540658105  | brain innervation |
| ENSDART00000152603 | eglN2                | 0.018920791 | -0.344914112 | -0.184325703 | -0.029073268 | 0.070142585  | brain innervation |
| ENSDART00000152924 | stxbp4               | 0.002497064 | 0.009805274  | -0.210366163 | 0.385226099  | 0.296155125  | brain innervation |
| ENSDART00000152973 | RNF157               | 0.002439392 | -0.237155894 | -0.35583425  | -0.110722293 | 0.097030733  | brain innervation |
| ENSDART00000153022 | AL935194.1           | 0.000106562 | -0.839883385 | -0.952071296 | -0.323659944 | -0.119202215 | brain innervation |
| ENSDART00000153146 | rbox3a               | 0.000155554 | -0.546449898 | -0.43963695  | 0.174623158  | 0.484406984  | brain innervation |
| ENSDART00000153284 | tbkbp1               | 0.000630366 | -0.504212532 | -0.489626186 | -0.240468452 | 0.072471561  | brain innervation |
| ENSDART00000153514 | si:ch211-121j5.4     | 0.006293989 | -0.438676742 | -0.189457468 | -0.187818697 | -0.117536785 | brain innervation |
| ENSDART00000153704 | anks1ab              | 3.38347E-05 | -0.440221806 | -0.75898091  | -0.133742531 | 0.137005152  | brain innervation |
| ENSDART00000153730 | CU856222.1           | 0.000116387 | -0.553584022 | -0.481855955 | -0.007954528 | 0.343506731  | brain innervation |
| ENSDART00000153824 | napba                | 0.002994106 | -0.634929885 | -0.324273151 | -0.096308603 | 0.10005339   | brain innervation |
| ENSDART00000153828 | atp2b3b              | 8.36884E-05 | -0.474522045 | -0.66566516  | -0.285016921 | 0.075707306  | brain innervation |
| ENSDART00000153897 | ndnfl                | 8.26035E-05 | -0.781136652 | -1.071097643 | -0.053351937 | 0.577095222  | brain innervation |
| ENSDART00000154039 | cntnap2a             | 0.000510711 | -0.318660467 | -0.524836596 | -0.23230439  | 0.054653452  | brain innervation |
| ENSDART00000154217 | tapbp1               | 6.43148E-05 | -0.790387635 | -1.110046917 | -0.234167162 | 0.243016032  | brain innervation |
| ENSDART00000154253 | VAMP1 (1 of many)    | 4.24705E-05 | -0.590038106 | -0.991557836 | -0.153916319 | 0.292977881  | brain innervation |
| ENSDART00000154256 | gabbr1a              | 0.000825994 | -0.701390177 | -1.072254559 | -0.049084095 | 0.380533583  | brain innervation |
| ENSDART00000154333 | camkva               | 0.000142247 | -0.731914874 | -0.620456244 | -0.460647205 | -0.026116956 | brain innervation |
| ENSDART00000154501 | cntnap1              | 0.000112893 | -0.715173489 | -0.84270145  | -0.359147123 | 0.122603648  | brain innervation |
| ENSDART00000154667 | SORCS3               | 0.000413975 | -0.864119649 | -0.84034251  | -0.370097899 | 0.056888282  | brain innervation |
| ENSDART00000154748 | sv2bb                | 0.000171543 | -0.593359268 | -0.537099772 | -0.285465428 | 0.087161334  | brain innervation |
| ENSDART00000154754 | grik1b               | 0.004364661 | -0.541985174 | -0.220416154 | -0.114773141 | -0.128231092 | brain innervation |
| ENSDART00000154811 | shank1               | 0.000776925 | -0.390024258 | -0.720748027 | -0.113172669 | 0.256359072  | brain innervation |

|                    |                    |             |               |              |              |              |                   |
|--------------------|--------------------|-------------|---------------|--------------|--------------|--------------|-------------------|
| ENSDART00000154869 | cacna1ha           | 7.43198E-05 | -0.561980799  | -0.554587419 | -0.200655166 | 0.115415453  | brain innervation |
| ENSDART00000155184 | lcorl              | 0.021296835 | -0.199231763  | -0.444480785 | -0.032192793 | -0.024389475 | brain innervation |
| ENSDART00000155397 | soat2              | 0.016354858 | -0.618559497  | -0.31486995  | -0.194806138 | -0.125519338 | brain innervation |
| ENSDART00000155494 | CR384099.1         | 0.00148037  | -0.702495416  | -0.755760921 | -0.229440848 | 0.245420937  | brain innervation |
| ENSDART00000155502 | sez6b              | 0.000937142 | -0.382545228  | -0.653854879 | -0.149982953 | 0.168281376  | brain innervation |
| ENSDART00000155563 | abca5              | 0.003355787 | -0.240041791  | -0.35443471  | -0.098648169 | 0.068480985  | brain innervation |
| ENSDART00000155592 | pcdh17             | 0.000461528 | -0.283490769  | -0.422406754 | -0.268768577 | 0.186259856  | brain innervation |
| ENSDART00000155658 | rapgef1            | 0.004578126 | -0.418362292  | -0.397338899 | 0.000660896  | -0.001869225 | brain innervation |
| ENSDART00000155666 | znf576.1           | 0.015256508 | -0.372721752  | -0.23410815  | -0.134923201 | -0.013577883 | brain innervation |
| ENSDART00000155757 | si:dkey-16p21.8    | 0.008752524 | -0.383053569  | -0.315569666 | -0.222717784 | 0.028079211  | brain innervation |
| ENSDART00000155840 | nyap2a             | 0.000605791 | -0.526663005  | -0.654892136 | 0.27374848   | 0.170536216  | brain innervation |
| ENSDART00000155843 | cntnap2a           | 8.92064E-05 | -0.263075507  | -0.343897302 | 0.676718804  | 0.99202798   | brain innervation |
| ENSDART00000155848 | CU929046.2         | 0.004951436 | -0.462340311  | -0.419607593 | -0.082173547 | -0.018364502 | brain innervation |
| ENSDART00000155866 | zbtb16b            | 8.488E-05   | -0.434457287  | -0.595844526 | 0.044569606  | 0.015262284  | brain innervation |
| ENSDART00000155935 | clstn3             | 0.000159813 | -0.324952015  | -0.256429293 | 0.203826088  | 0.321978764  | brain innervation |
| ENSDART00000155949 | grm8b              | 0.001007682 | -0.426657348  | -0.505637682 | -0.163630603 | 0.069819734  | brain innervation |
| ENSDART00000156012 | si:dkey-35i13.1    | 1.41905E-06 | -1.182557152  | -0.949918392 | -0.338171836 | -0.056213778 | brain innervation |
| ENSDART00000156341 | fam117ba           | 7.05055E-05 | -0.500099563  | -0.265235629 | 0.202099115  | 0.368226992  | brain innervation |
| ENSDART00000156375 | kcnq2b             | 0.000178718 | -0.284091354  | -0.197722227 | 0.27148365   | 0.512045099  | brain innervation |
| ENSDART00000156380 | CR848757.1         | 2.98725E-05 | -0.431298815  | -0.377014166 | 0.404962464  | 0.865655337  | brain innervation |
| ENSDART00000156393 | AL772314.1         | 6.26753E-05 | -0.272422966  | -0.157258449 | 0.218420805  | 0.368190657  | brain innervation |
| ENSDART00000156570 | slc6a17            | 0.002913561 | -0.448593137  | -0.394227085 | -0.032159276 | 0.074756396  | brain innervation |
| ENSDART00000156705 | si:dkeyp-72g9.4    | 0.000811547 | -0.743143803  | -0.697928004 | -0.454613917 | -0.077239927 | brain innervation |
| ENSDART00000156820 | si:dkey-7j14.5     | 4.77268E-06 | -0.971869146  | -0.757334904 | 0.08249331   | 0.800607437  | brain innervation |
| ENSDART00000156965 | osbp15             | 5.8648E-05  | -0.5262639629 | -0.452865482 | 0.296781507  | 0.346469129  | brain innervation |
| ENSDART00000156982 | si:ch211-195b15.8  | 0.000596344 | -0.203622983  | -0.158924419 | -0.050797883 | 0.351311882  | brain innervation |
| ENSDART00000157018 | stmn3              | 4.91848E-05 | -1.008205118  | -1.406964646 | -0.116902659 | 0.621837811  | brain innervation |
| ENSDART00000157125 | vsnl1b             | 2.15557E-05 | -0.832964446  | -0.803942924 | -0.29707501  | 0.109485311  | brain innervation |
| ENSDART00000157171 | si:ch211-168d23.3  | 0.027638894 | -0.276296251  | -0.552181073 | -0.115547916 | -0.061680907 | brain innervation |
| ENSDART00000157237 | si:dkey-56f14.7    | 0.013233841 | -0.377561364  | -0.203140811 | -0.202521092 | -0.065412084 | brain innervation |
| ENSDART00000157265 | trim13             | 0.022539179 | -0.831738752  | -0.32341984  | -0.102064486 | -0.071474505 | brain innervation |
| ENSDART00000157302 | si:dkey-7j14.5     | 1.31948E-06 | -0.795010515  | -0.583416344 | 0.327377123  | 0.951280694  | brain innervation |
| ENSDART00000157428 | pik3r3b            | 0.001317626 | -0.522784766  | -0.44851499  | -0.152608244 | 0.028231585  | brain innervation |
| ENSDART00000157449 | clstn2             | 0.000466769 | -0.339354151  | -0.60478304  | 0.06475081   | 0.303731917  | brain innervation |
| ENSDART00000157454 | ncam1a             | 0.005875165 | -0.363879899  | -0.114400367 | 0.050687773  | 0.064981174  | brain innervation |
| ENSDART00000157518 | hspa12a            | 5.66718E-05 | -0.767789618  | -0.701014156 | 0.093464144  | 0.364648116  | brain innervation |
| ENSDART00000157769 | pcdh1gc5           | 0.001135528 | -0.403524411  | -0.226721593 | 0.040583925  | 0.029815654  | brain innervation |
| ENSDART00000157788 | CAB201031894.1     | 0.004627449 | -0.75935498   | -0.746140313 | -0.275189537 | -0.221209558 | brain innervation |
| ENSDART00000158213 | akap12b            | 0.000529346 | -1.00724688   | -1.146388756 | -0.599808188 | 0.009805796  | brain innervation |
| ENSDART00000158355 | bsk146             | 0.000219336 | -0.973617487  | -0.7163723   | -0.116416923 | 0.102394026  | brain innervation |
| ENSDART00000158429 | tmem42b            | 0.001002974 | -0.433937172  | -0.428108528 | -0.048957595 | 0.127616146  | brain innervation |
| ENSDART00000158489 | zgc:77058          | 1.34007E-05 | -0.495737975  | -0.228595493 | 0.141443601  | 0.440592752  | brain innervation |
| ENSDART00000158500 | atp8b2             | 0.000419956 | -0.533001796  | -0.553651375 | -0.17260282  | 0.179842571  | brain innervation |
| ENSDART00000158618 | cpne4b             | 4.49433E-05 | -1.041271467  | -0.75854166  | 0.438341768  | 1.045239509  | brain innervation |
| ENSDART00000158671 | sult4a1            | 8.51245E-05 | -0.462609111  | -0.368663113 | -0.083169387 | 0.198622288  | brain innervation |
| ENSDART00000158723 | sncb               | 0.008362897 | -0.257429657  | -0.430720868 | -0.069889176 | 0.08182323   | brain innervation |
| ENSDART00000158936 | grin1a             | 0.000250511 | -0.976292061  | -1.003442352 | -0.317903979 | 0.15163936   | brain innervation |
| ENSDART00000159104 | atp1b2a            | 0.000804628 | -0.488650552  | -0.417675156 | -0.129746035 | 0.084213141  | brain innervation |
| ENSDART00000159249 | oxr1a              | 0.000445792 | -0.748854688  | -0.518408458 | -0.301236362 | -0.153948362 | brain innervation |
| ENSDART00000159291 | podxl2             | 0.000184045 | -0.45367951   | -0.207714244 | 0.333702352  | 0.497299671  | brain innervation |
| ENSDART00000159589 | rtn4r11b           | 0.00013806  | -0.618605611  | -0.334861623 | -0.03219779  | 0.419833076  | brain innervation |
| ENSDART00000159601 | serpini1           | 0.000352454 | -0.44709139   | -0.357709199 | -0.198408132 | 0.076823185  | brain innervation |
| ENSDART00000159627 | scn4ba             | 0.000451042 | -1.651719386  | -1.747876787 | -0.730948262 | -0.207716251 | brain innervation |
| ENSDART00000159690 | gpr75              | 0.002568245 | -0.483974147  | -0.377125661 | 0.037666989  | 0.123067934  | brain innervation |
| ENSDART00000159693 | NYAP1              | 0.001144712 | -0.548984567  | -0.516611795 | -0.021366781 | 0.000605996  | brain innervation |
| ENSDART00000159727 | pcdh11             | 0.000494919 | -0.294947297  | -0.365638864 | -0.089140913 | 0.17419873   | brain innervation |
| ENSDART00000159805 | CAB201085924.1     | 0.000283607 | -0.392684277  | -0.456709342 | 0.004929566  | 0.18758642   | brain innervation |
| ENSDART00000159853 | FQ311890.1         | 0.000463544 | -0.276177481  | -0.432407927 | -0.032078728 | 0.27665545   | brain innervation |
| ENSDART00000159942 | kncn3b             | 0.000847723 | -0.794025304  | -1.361623092 | -0.389946342 | 0.009706478  | brain innervation |
| ENSDART00000160018 | DUSP26             | 0.00184704  | -0.660306321  | -0.709450564 | -0.129656337 | 0.007184288  | brain innervation |
| ENSDART00000160138 | sobpa              | 0.003891676 | -0.321225255  | -0.895188795 | -0.069068022 | 0.312612038  | brain innervation |
| ENSDART00000160350 | IQSEC1 (1 of many) | 0.012665885 | -0.73025949   | -0.724161984 | -0.227945297 | -0.158150827 | brain innervation |
| ENSDART00000160464 | pcdh1gb2           | 0.037611012 | -0.570850707  | -0.31567681  | -0.173184848 | -0.165810233 | brain innervation |
| ENSDART00000160466 | ndrg4              | 0.001418732 | -0.797536516  | -0.447807808 | -0.265830716 | -0.169347229 | brain innervation |
| ENSDART00000160469 | si:ch211-271b14.1  | 0.005629236 | -0.816113506  | -0.956386746 | -0.419124903 | -0.031051269 | brain innervation |
| ENSDART00000160662 | CAB201056578.1     | 0.001955985 | -0.678580777  | -0.38089804  | -0.298190661 | -0.130306976 | brain innervation |
| ENSDART00000160789 | SDK2 (1 of many)   | 0.006197253 | -0.531586731  | -0.76443238  | -0.126364502 | 0.194536592  | brain innervation |
| ENSDART00000160809 | agap1              | 0.000470359 | -0.12094537   | -0.11171461  | 0.245949776  | 0.322867446  | brain innervation |
| ENSDART00000160811 | b3gat1a            | 0.000188707 | -0.509506437  | -0.522178413 | -0.230803048 | 0.152925891  | brain innervation |
| ENSDART00000160881 | pcdh1g30           | 0.001490782 | -0.53895262   | -0.083348601 | 0.159825551  | 0.241016465  | brain innervation |
| ENSDART00000160885 | stbd1              | 0.007301761 | -0.425801769  | -0.465748469 | -0.195945725 | 0.034690374  | brain innervation |
| ENSDART00000161003 | cpne9              | 0.001482057 | -1.056006542  | -1.193405404 | -0.117014879 | 0.290018934  | brain innervation |
| ENSDART00000161115 | CR382281.1         | 0.004084205 | -1.148281272  | -0.70950654  | -0.315399276 | 0.210191426  | brain innervation |
| ENSDART00000161137 | scn1bb             | 2.29102E-05 | -0.455645009  | -0.546610376 | 0.183837534  | 0.407926687  | brain innervation |
| ENSDART00000161264 | ntrk3b             | 0.000108364 | -0.768053413  | -0.724776652 | -0.30616772  | 0.183034577  | brain innervation |

|                    |                   |             |               |              |              |              |                   |
|--------------------|-------------------|-------------|---------------|--------------|--------------|--------------|-------------------|
| ENSDART00000161436 | pcdh7b            | 5.5105E-05  | -0.687665671  | -0.773740554 | -0.245502692 | 0.12030382   | brain innervation |
| ENSDART00000161507 | zgc:153426        | 1.98934E-05 | -1.880708803  | -0.117657621 | 0.865737326  | 1.072245785  | brain innervation |
| ENSDART00000161532 | zfyye9b           | 0.000512152 | -0.607365928  | -0.871459147 | -0.090833114 | 0.138377783  | brain innervation |
| ENSDART00000161561 | ANK1 (1 of many)  | 0.001021091 | -0.90876402   | -0.980007711 | -0.299110873 | -0.111310605 | brain innervation |
| ENSDART00000161567 | KCNT1 (1 of many) | 0.000451042 | -0.564631347  | -0.618941642 | -0.212804629 | 0.112863315  | brain innervation |
| ENSDART00000161646 | sema6bb           | 0.009956893 | -0.22063759   | -0.362707192 | -0.160882628 | 0.032299092  | brain innervation |
| ENSDART00000161700 | st3gal2           | 0.000191101 | -0.330022994  | -0.187434223 | 0.066957229  | 0.392836726  | brain innervation |
| ENSDART00000161725 | map7d1a           | 0.007973168 | -0.696007823  | -0.432281688 | 0.042931769  | 0.13512701   | brain innervation |
| ENSDART00000161992 | PAQR9             | 0.016559516 | -0.193753966  | -0.524789375 | -0.118624882 | 0.042415903  | brain innervation |
| ENSDART00000162002 | grm1b             | 0.001159496 | -0.568603213  | -0.750999293 | -0.21404532  | -0.094504234 | brain innervation |
| ENSDART00000162023 | plppr2a           | 0.001528476 | 0.019417247   | -0.576626688 | 0.082766084  | 0.317388761  | brain innervation |
| ENSDART00000162133 | tenm4             | 0.007324183 | -0.287462387  | -0.412164757 | -0.184969779 | 0.049525758  | brain innervation |
| ENSDART00000162277 | grip1             | 5.26677E-05 | -0.456620328  | -0.2169797   | 0.146006741  | 0.157130316  | brain innervation |
| ENSDART00000162381 | dkk3a             | 0.000417493 | -0.551126502  | -0.361561955 | -0.324385943 | 0.074151181  | brain innervation |
| ENSDART00000162601 | scn2b             | 0.000115668 | -0.529498392  | -0.64570335  | -0.359290818 | 0.039638437  | brain innervation |
| ENSDART00000162670 | slc8a1b           | 0.001547111 | -0.269852688  | -0.529256481 | -0.096682296 | 0.048355338  | brain innervation |
| ENSDART00000162675 | trim2b            | 0.004332449 | -0.409757052  | -0.631223683 | -0.07653124  | 0.093922127  | brain innervation |
| ENSDART00000162714 | pcdh10b           | 0.00041526  | -0.340908137  | -0.430434424 | -0.069086695 | 0.178421467  | brain innervation |
| ENSDART00000162850 | irx3a             | 0.000148815 | -0.694816328  | -0.301932125 | 0.187764734  | 0.208405543  | brain innervation |
| ENSDART00000162984 | cacnb2a           | 0.000644738 | -0.567328475  | -0.858575333 | 0.120461387  | 0.550245867  | brain innervation |
| ENSDART00000163006 | magr1b            | 1.36917E-05 | -0.558734199  | -0.633598853 | 0.045195354  | 0.572492467  | brain innervation |
| ENSDART00000163096 | mpr22b            | 4.91848E-05 | -1.106969479  | -1.366483735 | -0.599957035 | 0.051341663  | brain innervation |
| ENSDART00000163216 | prune2            | 0.005893002 | -0.414992243  | -0.329741076 | -0.094156508 | 0.003976732  | brain innervation |
| ENSDART00000163355 | gria2a            | 0.001252059 | -0.370072776  | -0.57694131  | -0.293854127 | 0.240567837  | brain innervation |
| ENSDART00000163519 | CAB201050166.1    | 0.000257591 | -0.484053035  | -0.532447227 | -0.143157501 | 0.191505756  | brain innervation |
| ENSDART00000163529 | FAM126B           | 0.002016009 | -0.519426512  | -0.370293712 | 0.022402011  | 0.032038169  | brain innervation |
| ENSDART00000163539 | scrt1a            | 7.10385E-05 | -0.576475687  | -0.187048661 | 0.063865515  | 0.398969662  | brain innervation |
| ENSDART00000163612 | gabrb4            | 0.000645779 | -0.445185281  | -0.610684009 | -0.211332691 | 0.127493005  | brain innervation |
| ENSDART00000163616 | homer1b           | 0.002838981 | -0.487597805  | -0.239525084 | -0.239441952 | -0.083482271 | brain innervation |
| ENSDART00000163622 | kirrel3l          | 0.013286981 | -0.615947415  | -0.493751402 | -0.207879997 | 0.127527609  | brain innervation |
| ENSDART00000163635 | erbb4b            | 0.011458427 | -0.423431984  | -0.772483288 | -0.24962409  | 0.07826798   | brain innervation |
| ENSDART00000163669 | cplx2             | 0.011375495 | -0.602497387  | -0.424820216 | -0.158797592 | 0.046498934  | brain innervation |
| ENSDART00000163677 | NA                | 0.000160913 | -0.439905731  | -0.179601491 | 0.106036319  | 0.34272584   | brain innervation |
| ENSDART00000163791 | acs2l             | 0.000960572 | -0.694063426  | -0.500876422 | -0.115488475 | -0.045115535 | brain innervation |
| ENSDART00000163867 | gnb1b             | 0.000919184 | -0.511340157  | -0.236747213 | 0.117718298  | 0.111335872  | brain innervation |
| ENSDART00000163897 | lgi1b             | 0.000144591 | -0.358188713  | -0.274223364 | -0.009680681 | 0.361584537  | brain innervation |
| ENSDART00000163903 | kcna2b            | 5.02856E-05 | -1.041609083  | -1.150732339 | -0.278604653 | 0.240702332  | brain innervation |
| ENSDART00000163951 | plppr1            | 0.00335169  | -0.393500272  | -0.316896098 | -0.148613826 | 0.078198855  | brain innervation |
| ENSDART00000164114 | grb2a             | 0.000322945 | -0.50918281   | -0.254702947 | 0.293231191  | 0.639895729  | brain innervation |
| ENSDART00000164121 | mboat2b           | 0.01376164  | -0.365653489  | -0.229675996 | -0.118902893 | -0.108744854 | brain innervation |
| ENSDART00000164163 | si:dkey-202l22.3  | 3.90156E-05 | -0.4767171428 | -1.127391316 | 0.216542828  | 0.638796234  | brain innervation |
| ENSDART00000164178 | prrt2             | 7.10385E-05 | -0.547052118  | -0.283537507 | 0.297793332  | 0.499767197  | brain innervation |
| ENSDART00000164190 | ksr2              | 0.000228698 | -0.449890716  | -0.587945856 | -0.131638865 | 0.158651331  | brain innervation |
| ENSDART00000164326 | si:ch73-119p20.1  | 8.83909E-05 | -0.36329758   | -0.388299747 | 0.050179382  | 0.305653209  | brain innervation |
| ENSDART00000164361 | gcgr3             | 0.001631005 | -0.404304946  | -0.520606663 | -0.179928762 | -0.009148827 | brain innervation |
| ENSDART00000164597 | si:ch73-127m5.1   | 0.000190025 | -0.712165198  | -0.239448184 | 0.59846121   | 0.690834997  | brain innervation |
| ENSDART00000164879 | slc8a2b           | 0.004027736 | -0.298961891  | -0.426517442 | -0.175774312 | 0.049460205  | brain innervation |
| ENSDART00000164982 | cdh4              | 5.24617E-05 | -0.415355609  | -0.489911794 | 0.041403227  | 0.334639192  | brain innervation |
| ENSDART00000164989 | si:ch211-121j5.4  | 0.005899482 | -2.541662275  | -0.597024815 | -0.157115726 | -0.615748868 | brain innervation |
| ENSDART00000165004 | gria3b            | 0.001296944 | -0.410652366  | -0.638891942 | -0.274205904 | 0.132979921  | brain innervation |
| ENSDART00000165058 | rims2a            | 0.004379828 | -0.759006031  | -0.607036719 | -0.257997898 | -0.111766909 | brain innervation |
| ENSDART00000165082 | ppp1r1b           | 0.000811535 | -0.592550768  | -0.433249399 | 0.132918309  | 0.038849346  | brain innervation |
| ENSDART00000165108 | jph3              | 0.008210772 | -0.254573235  | -0.426555215 | 0.040987467  | 0.08534723   | brain innervation |
| ENSDART00000165158 | iqsec3a           | 0.002139835 | -0.287263936  | -0.339420666 | -0.160997893 | 0.073213089  | brain innervation |
| ENSDART00000165400 | slc1a2b           | 0.01293062  | -0.437547383  | -0.373563248 | -0.176045295 | -0.026222695 | brain innervation |
| ENSDART00000165420 | si:dkey-161j23.5  | 0.000212569 | -0.418752064  | -0.09080604  | 0.112517016  | 0.202865451  | brain innervation |
| ENSDART00000165443 | zgc:153615        | 4.64299E-05 | -0.585165411  | -0.400257189 | -0.265863973 | -0.020005469 | brain innervation |
| ENSDART00000165609 | barhl2            | 0.000401616 | -0.31272019   | -0.374018735 | 0.126371762  | 0.224852149  | brain innervation |
| ENSDART00000165638 | pax10             | 0.001292159 | -0.459647113  | -0.417992165 | -0.200180992 | -0.120970793 | brain innervation |
| ENSDART00000165654 | atp1b2a           | 5.13907E-05 | -0.572829136  | -0.493634763 | -0.065881564 | 0.075479325  | brain innervation |
| ENSDART00000165659 | epb4113a          | 0.027884112 | -0.249067696  | -0.637410719 | -0.072556493 | -0.093775549 | brain innervation |
| ENSDART00000165698 | pbx1a             | 0.000272902 | -0.205212048  | -0.330154536 | 0.047550564  | 0.321002436  | brain innervation |
| ENSDART00000165744 | kif1b             | 0.001276988 | -0.018685925  | -0.126032816 | 0.340319561  | 0.347744455  | brain innervation |
| ENSDART00000165757 | pax6b             | 0.019981901 | -1.030621281  | -0.736504391 | -0.510180699 | -0.112500923 | brain innervation |
| ENSDART00000165785 | pcdh10a           | 0.001354936 | -0.2607204    | -0.385620436 | -0.040787194 | 0.144409091  | brain innervation |
| ENSDART00000166114 | sema3ab           | 0.01892315  | -0.726704016  | -0.305486009 | -0.172433457 | -0.053903823 | brain innervation |
| ENSDART00000166351 | nkrf              | 0.010292856 | -0.332043429  | -0.213944917 | -0.117297764 | -0.03436019  | brain innervation |
| ENSDART00000166470 | CU855947.1        | 0.009503355 | -0.432778868  | -0.336734093 | -0.219445916 | -0.079633712 | brain innervation |
| ENSDART00000166502 | satb2             | 1.1419E-05  | -0.540440017  | -0.158642442 | 1.216799418  | 1.496340928  | brain innervation |
| ENSDART00000166508 | fdft1             | 0.007609288 | -0.467410589  | -0.45021858  | 0.057865823  | -0.125768039 | brain innervation |
| ENSDART00000166533 | zgc:123181        | 2.15557E-05 | -0.682536387  | -0.078871471 | 0.212564109  | 0.407498801  | brain innervation |
| ENSDART00000166575 | ppp3ca            | 0.000363739 | -0.493387865  | -0.574192875 | 0.281204144  | 0.517021392  | brain innervation |
| ENSDART00000167306 | ldb2b             | 0.003805801 | -0.838228207  | -0.415457403 | -0.325734782 | 0.110687477  | brain innervation |
| ENSDART00000167324 | ebf3a             | 4.91848E-05 | -0.585714789  | -0.243731213 | 0.563349846  | 0.843370215  | brain innervation |
| ENSDART00000167464 | GNAZ              | 0.003016249 | -0.341892906  | -0.155068478 | 0.102581405  | 0.079027974  | brain innervation |

|                     |                     |             |              |              |              |              |                                           |
|---------------------|---------------------|-------------|--------------|--------------|--------------|--------------|-------------------------------------------|
| ENSDART00000167726  | RYR2                | 5.17084E-05 | -0.554726037 | -0.413134766 | 0.099586067  | 0.289722828  | brain innervation                         |
| ENSDART00000167995  | napba               | 0.006669949 | -0.341681302 | -0.334450461 | -0.176497327 | -0.027366162 | brain innervation                         |
| ENSDART00000168038  | edil3a              | 7.05055E-05 | -0.585018977 | -0.697545399 | -0.17495912  | 0.33520597   | brain innervation                         |
| ENSDART00000168121  | lzts3a              | 0.020009895 | -0.348828928 | -0.543883063 | -0.164874094 | 0.093345065  | brain innervation                         |
| ENSDART00000168270  | CABZ01048053.1      | 0.000157185 | -0.515099411 | -0.533680852 | 0.225344787  | 0.362581791  | brain innervation                         |
| ENSDART00000168396  | FO904869.1          | 0.008573911 | -0.490668054 | -0.607434677 | -0.194530972 | 0.12309886   | brain innervation                         |
| ENSDART00000168453  | slc43a2a            | 0.000169466 | -0.36850619  | -0.532753158 | 0.198651765  | 0.248433931  | brain innervation                         |
| ENSDART00000168568  | CU861477.1          | 0.002569884 | -0.399340079 | -0.694343635 | -0.183948068 | 0.054030168  | brain innervation                         |
| ENSDART00000168633  | CABZ01085700.1      | 5.17084E-05 | -0.53401794  | -0.080184443 | 0.667052745  | 0.803861054  | brain innervation                         |
| ENSDART00000168729  | fam196ab            | 0.003860077 | -0.54578901  | -0.555866325 | -0.405243034 | 0.063979844  | brain innervation                         |
| ENSDART00000168749  | nlg3a               | 0.001942462 | -0.417078437 | -0.490224096 | -0.240516544 | -0.086053557 | brain innervation                         |
| ENSDART00000168805  | kcnk9               | 0.002102587 | -0.553605245 | -0.952161118 | -0.308244106 | 0.289642563  | brain innervation                         |
| ENSDART00000168885  | nrp1                | 0.000322759 | -0.78621851  | -0.719452399 | 0.167065606  | 0.289901187  | brain innervation                         |
| ENSDART00000168969  | htr7c               | 0.004472999 | -0.617759768 | -0.791263551 | -0.091828465 | 0.038777953  | brain innervation                         |
| ENSDART00000169081  | mtmr7b              | 0.000669667 | -0.302136082 | -0.184242994 | 0.142322853  | 0.09943817   | brain innervation                         |
| ENSDART00000169127  | adgrb3              | 0.004610119 | -0.338634159 | -0.316792657 | -0.154400064 | 0.089681207  | brain innervation                         |
| ENSDART00000169243  | znf384l             | 0.012912717 | -0.366831524 | -0.600767675 | -0.247311028 | 0.205515141  | brain innervation                         |
| ENSDART00000169552  | cdh13               | 0.000225609 | -0.778914955 | -0.463881372 | -0.06287293  | 0.145633136  | brain innervation                         |
| ENSDART00000169626  | kcnc1a              | 0.003703617 | -0.804732723 | -1.394467436 | -0.226498418 | 0.073837621  | brain innervation                         |
| ENSDART00000169768  | slc8a3              | 0.004351059 | -0.133596734 | -0.60366341  | -0.159093114 | 0.187240856  | brain innervation                         |
| ENSDART00000169948  | GRM7                | 0.005631068 | -0.415342332 | -0.376852993 | -0.226859206 | -0.023200649 | brain innervation                         |
| ENSDART00000170089  | epha4b              | 0.011264004 | -0.586426265 | -0.698463168 | -0.228203192 | -0.016930318 | brain innervation                         |
| ENSDART00000170165  | cep97               | 0.016618446 | -4.277597338 | -0.154895502 | -0.337498335 | -0.461056374 | brain innervation                         |
| ENSDART00000170396  | apbb2b              | 2.95145E-05 | -0.997027217 | -0.745617105 | 0.597402109  | 1.180709512  | brain innervation                         |
| ENSDART00000170423  | jakmip3             | 0.002756705 | -0.243674673 | -0.387799515 | -0.202768181 | 0.090619484  | brain innervation                         |
| ENSDART00000170453  | slc20a1b            | 0.003686476 | -0.460714141 | -0.247481668 | -0.017046699 | -0.023964599 | brain innervation                         |
| ENSDART00000170460  | nrxn3b              | 0.003312965 | -0.2276052   | -0.615850363 | -0.134586161 | -0.003465474 | brain innervation                         |
| ENSDART00000170510  | RIMBP2 (1 of many)  | 0.000415146 | -0.653406892 | -0.568163429 | -0.174788334 | -0.007324529 | brain innervation                         |
| ENSDART00000170569  | sytl2               | 1.45694E-05 | -0.747896951 | -0.906145295 | -0.362441574 | -0.047384497 | brain innervation                         |
| ENSDART00000170620  | ctxn1               | 0.006828168 | -1.120908397 | -0.319127099 | 0.144625495  | 0.239695278  | brain innervation                         |
| ENSDART00000170680  | ptprdb              | 1.22823E-05 | -0.822263801 | -1.170454394 | 0.28663796   | 0.697055522  | brain innervation                         |
| ENSDART00000170700  | nacc1b              | 0.000772038 | -0.295710389 | -0.416714615 | 0.013950982  | 0.110349783  | brain innervation                         |
| ENSDART00000170839  | pcdh1g26            | 7.10385E-05 | -0.648364026 | -0.34360777  | 0.683964001  | 0.607743239  | brain innervation                         |
| ENSDART00000170854  | gphnb               | 2.98725E-05 | -0.471165414 | -0.533169869 | -0.144401896 | 0.220388206  | brain innervation                         |
| ENSDART00000170875  | BX663610.1          | 0.008814649 | -0.528067918 | -0.63401091  | -0.217086155 | -0.025338796 | brain innervation                         |
| ENSDART00000170888  | pkma                | 0.009639463 | -0.382873513 | -0.359191464 | -0.202639045 | 0.04775771   | brain innervation                         |
| ENSDART00000170932  | rims2a              | 0.000444888 | -0.482409185 | -0.599060629 | -0.273352321 | -0.056203652 | brain innervation                         |
| ENSDART00000170952  | pvr12l              | 0.000405848 | -0.402141005 | -0.731362921 | -0.043297784 | 0.281757642  | brain innervation                         |
| ENSDART00000171013  | tenm4               | 0.009203641 | -0.557784731 | -0.616815207 | -0.086642376 | -0.101260046 | brain innervation                         |
| ENSDART00000171073  | tox2                | 0.012896891 | -0.713271279 | -0.691854818 | -0.08505138  | -0.233730891 | brain innervation                         |
| ENSDART00000171114  | si:dkey-18j18.3     | 0.00335169  | -5.054012109 | -5.054146995 | -1.846245188 | 0.223162792  | brain innervation                         |
| ENSDART00000171288  | mag12b              | 0.003659486 | -0.2673453   | -0.525609031 | -0.078206648 | -0.00532511  | brain innervation                         |
| ENSDART00000171306  | stxbp1a             | 0.001277839 | -0.614795684 | -0.539858263 | -0.126841305 | 0.057169963  | brain innervation                         |
| ENSDART00000171359  | asic1b              | 0.000948363 | -0.583045866 | -0.669491195 | -0.186449925 | 0.212036898  | brain innervation                         |
| ENSDART00000171490  | PCDH8               | 2.78074E-05 | -0.518696681 | -0.628285802 | -0.168709969 | 0.408565003  | brain innervation                         |
| ENSDART00000171494  | ssbp2               | 0.000598084 | -0.298958691 | -0.315587827 | -0.028952479 | 0.152638316  | brain innervation                         |
| ENSDART00000171506  | NA                  | 6.00847E-05 | -0.792662919 | -0.4993043   | 0.08528346   | 0.180572156  | brain innervation                         |
| ENSDART00000171571  | FAM184A (1 of many) | 0.001237101 | -0.84950254  | -1.068290057 | 0.155587747  | 0.361779982  | brain innervation                         |
| ENSDART00000171594  | mef2aa              | 0.010231208 | -0.649844171 | -0.685014218 | -0.301258241 | -0.003741614 | brain innervation                         |
| ENSDART00000171674  | abhd8a              | 0.000204711 | -0.482604068 | -0.462135418 | 0.077091696  | 0.23737745   | brain innervation                         |
| ENSDART00000171704  | soul4               | 0.004085991 | -0.335441282 | -0.335430337 | -0.104813252 | -0.062286587 | brain innervation                         |
| ENSDART00000171951  | slit2               | 0.003148896 | -0.546372344 | -0.56571293  | -0.270916548 | -0.035288929 | brain innervation                         |
| ENSDART00000172232  | sv2a                | 0.00145694  | -0.325019669 | -0.478402861 | -0.246153159 | 0.031695064  | brain innervation                         |
| ENSDART00000172465  | gnb1b               | 0.003905267 | -0.429380032 | -0.139749463 | 0.050389396  | 0.071415749  | brain innervation                         |
| ENSDART00000172552  | dyrk2               | 0.007164707 | -1.00865602  | -4.097564958 | -0.48472737  | -0.263450257 | brain innervation                         |
| ENSDART00000172624  | chn1                | 0.001420911 | -0.429491719 | -0.379515323 | -0.144891996 | -0.16828013  | brain innervation                         |
| ENSDART00000172634  | ryr3                | 0.003072278 | -1.057085419 | -1.586723574 | -0.163110923 | 0.331797887  | brain innervation                         |
| ENSDART00000172638  | gria3a              | 0.000581789 | -0.308989617 | -0.39028425  | -0.157465183 | 0.147319123  | brain innervation                         |
| ENSDART00000172645  | unc5da              | 0.000935288 | -0.375739047 | -0.576943357 | -0.183677467 | 0.03667029   | brain innervation                         |
| ENSDART00000172664  | kirrel3l            | 0.000274768 | -0.579597094 | -0.334224423 | -0.00269739  | 0.256102934  | brain innervation                         |
| ENSDART00000173017  | atp2b2              | 0.002838732 | -0.485284755 | -0.507921276 | -0.213758166 | 0.050306247  | brain innervation                         |
| ENSDART00000173060  | rph3ab              | 4.91848E-05 | -0.917567753 | -0.595167162 | 0.673778236  | 0.835535825  | brain innervation                         |
| ENSDART00000173108  | gpc3                | 2.23813E-05 | -0.979170892 | -0.757011653 | 0.064815285  | 0.413031736  | brain innervation                         |
| ENSDART00000173126  | klhl4               | 0.012397761 | -0.76515123  | -0.487744119 | -0.047554388 | -0.018081928 | brain innervation                         |
| ENSDART00000173192  | pcdh1b              | 0.001151232 | -0.448371004 | -0.996454455 | -0.461950735 | 0.179661768  | brain innervation                         |
| ENSDART00000173210  | kcnab2a             | 6.7807E-05  | -0.633080178 | -0.760216594 | -0.295624932 | -0.02803528  | brain innervation                         |
| ENSDART00000173228  | slc6a11b            | 0.000233744 | -1.626653664 | -2.205227269 | -0.432079303 | 0.774903159  | brain innervation                         |
| ENSDART00000173301  | sfxn5b              | 0.004367955 | -0.333126218 | -0.098925577 | -0.061350927 | 0.22562903   | brain innervation                         |
| ENSDART00000173421  | lingo2a             | 0.000589104 | -0.727375414 | -0.584905703 | -0.169839849 | 0.100856447  | brain innervation                         |
| ENSDART00000000804  | slc8a1b             | 0.0088045   | -0.216070414 | -0.730017061 | -0.564883211 | -0.309532287 | downregulated during regeneration - early |
| ENSDART00000000876  | nr4a1               | 0.000894056 | -2.262372442 | -2.399082592 | -2.145415905 | -1.543723254 | downregulated during regeneration - early |
| ENSDART000000001907 | slc16a3             | 0.026714705 | -0.228617593 | -0.852511558 | -0.452127784 | -0.215137636 | downregulated during regeneration - early |
| ENSDART000000003008 | gad1b               | 0.009594186 | -0.355298425 | -0.380219055 | -0.456528647 | -0.347996362 | downregulated during regeneration - early |
| ENSDART000000003548 | znf385a             | 0.001069696 | -0.544762633 | -0.635515273 | -0.316063497 | -0.128464507 | downregulated during regeneration - early |
| ENSDART000000003736 | anos1b              | 0.02243441  | -0.470963792 | -0.442368787 | -0.444507654 | -0.318716779 | downregulated during regeneration - early |



|                   |                |             |              |              |              |              |                                           |
|-------------------|----------------|-------------|--------------|--------------|--------------|--------------|-------------------------------------------|
| ENSDART0000004034 | hpca           | 0.000804628 | -0.538662149 | -0.391929378 | -0.242660916 | -0.195867715 | downregulated during regeneration - early |
| ENSDART0000004626 | sec62          | 0.03450478  | -0.335700502 | -0.25907023  | -0.14783183  | -0.155829549 | downregulated during regeneration - early |
| ENSDART0000005299 | hsd17b12a      | 0.040876822 | -0.345584522 | -0.261321345 | -0.169519073 | -0.263954396 | downregulated during regeneration - early |
| ENSDART0000005724 | ncanb          | 0.007781565 | -0.308688969 | -0.586976696 | -0.410319756 | -0.132925594 | downregulated during regeneration - early |
| ENSDART0000005738 | slitrk2        | 0.002539213 | -0.40615183  | -0.499760308 | -0.343598039 | -0.061449053 | downregulated during regeneration - early |
| ENSDART0000005842 | fgf1a          | 0.001013659 | -0.526483511 | -0.462706743 | -0.482028176 | -0.1224057   | downregulated during regeneration - early |
| ENSDART0000006417 | pgm1           | 0.001451795 | -0.367653769 | -0.345273975 | -0.348210636 | -0.086795004 | downregulated during regeneration - early |
| ENSDART0000007401 | MAP3K13        | 0.019500385 | -0.231843501 | -0.363439198 | -0.331818795 | -0.269324908 | downregulated during regeneration - early |
| ENSDART0000007522 | anos1a         | 0.001275399 | -0.387064252 | -0.407287946 | -0.526812004 | -0.211300468 | downregulated during regeneration - early |
| ENSDART0000007630 | nhlh2          | 0.010056242 | -0.28794611  | -0.324673306 | -0.385652145 | -0.261092419 | downregulated during regeneration - early |
| ENSDART0000007778 | grik1a         | 0.008380474 | -0.423674769 | -0.190804556 | -0.271114709 | -0.0631136   | downregulated during regeneration - early |
| ENSDART0000008287 | pgam1a         | 0.011948793 | -0.270559913 | -0.416576315 | -0.324017463 | -0.168254728 | downregulated during regeneration - early |
| ENSDART0000009337 | eno1a          | 0.014647445 | -0.306364992 | -0.428345122 | -0.288646494 | -0.130833414 | downregulated during regeneration - early |
| ENSDART0000009569 | slc12a5b       | 0.001340966 | -0.543274129 | -0.639831062 | -0.420973005 | -0.072437192 | downregulated during regeneration - early |
| ENSDART0000009653 | kcna1b         | 0.000806652 | -0.51649998  | -0.917921415 | -0.602149268 | -0.420615578 | downregulated during regeneration - early |
| ENSDART0000009777 | glra3          | 0.000683221 | -0.385455571 | -0.554614528 | -0.516083394 | -0.22262256  | downregulated during regeneration - early |
| ENSDART0000009938 | tcf12          | 0.025246927 | -0.385864267 | -0.351608927 | -0.283149928 | -0.323464659 | downregulated during regeneration - early |
| ENSDART0000010257 | fam73a         | 0.046446554 | -0.203941778 | -0.403469011 | -0.199714259 | -0.045216291 | downregulated during regeneration - early |
| ENSDART0000010452 | zgc:91860      | 0.008679209 | -0.346186809 | -0.437676548 | -0.463741509 | -0.203120402 | downregulated during regeneration - early |
| ENSDART0000011287 | aqp4           | 0.010984291 | -0.584037248 | -0.688442177 | -0.670108654 | -0.488547149 | downregulated during regeneration - early |
| ENSDART0000011627 | irx7           | 0.004741095 | -0.27830639  | -0.509115666 | -0.233145912 | -0.150983114 | downregulated during regeneration - early |
| ENSDART0000011936 | ccdc106a       | 0.067939329 | -0.452156269 | -0.26003137  | -0.330808493 | -0.261299438 | downregulated during regeneration - early |
| ENSDART0000012673 | gnb3a          | 0.000657061 | -0.611271729 | -0.360057677 | -0.265096652 | -0.439594606 | downregulated during regeneration - early |
| ENSDART0000013003 | tfap2b         | 0.008192536 | -0.299930992 | -0.578681033 | -0.25971747  | -0.279510711 | downregulated during regeneration - early |
| ENSDART0000013117 | yyt5b          | 0.003648083 | -0.373395784 | -0.436637374 | -0.372750952 | -0.393185839 | downregulated during regeneration - early |
| ENSDART0000013360 | ppp1r3cb       | 0.004590888 | -0.357586146 | -0.346668382 | -0.405594995 | -0.235559662 | downregulated during regeneration - early |
| ENSDART0000014668 | pcsx1          | 0.025485875 | -0.444651661 | -0.49391188  | -0.327964124 | -0.406864512 | downregulated during regeneration - early |
| ENSDART0000014726 | tp53i11b       | 0.03271715  | -0.378677803 | -0.267454179 | -0.193372925 | -0.148965425 | downregulated during regeneration - early |
| ENSDART0000015333 | gbx2           | 0.065341577 | -0.202064704 | -0.378779754 | -0.261598975 | -0.176372699 | downregulated during regeneration - early |
| ENSDART0000015956 | efna1b         | 0.054157717 | -0.412330789 | -0.211680079 | -0.214205067 | -0.214663513 | downregulated during regeneration - early |
| ENSDART0000016181 | ndrg3a         | 0.015357816 | -0.359622862 | -0.274997666 | -0.226177976 | -0.143111599 | downregulated during regeneration - early |
| ENSDART0000016983 | spon1a         | 0.001261708 | -0.566333419 | -0.54864414  | -0.425205045 | -0.214533594 | downregulated during regeneration - early |
| ENSDART0000017259 | fgf13a         | 0.058775394 | -0.403933655 | -0.684393894 | -0.638256176 | -0.336496098 | downregulated during regeneration - early |
| ENSDART0000017551 | slc6a1b        | 0.011705967 | -0.387372781 | -0.441576322 | -0.34448646  | -0.23699282  | downregulated during regeneration - early |
| ENSDART0000017599 | rem1           | 0.048973345 | -0.151492945 | -0.383680013 | -0.100323724 | -0.098680467 | downregulated during regeneration - early |
| ENSDART0000017763 | CAB201071180.1 | 0.028986846 | -0.429470778 | -0.866508186 | -0.658991937 | -0.375481088 | downregulated during regeneration - early |
| ENSDART0000017774 | cacng5a        | 0.002016009 | -0.685385238 | -0.470575642 | -0.348446742 | -0.159039188 | downregulated during regeneration - early |
| ENSDART0000018501 | opn4.1         | 0.0088045   | -0.494086134 | -0.180456491 | -0.369290026 | -0.100666897 | downregulated during regeneration - early |
| ENSDART0000018654 | rmd1b          | 0.003262292 | -0.711104866 | -0.668463449 | -0.311306501 | -0.458881777 | downregulated during regeneration - early |
| ENSDART0000019748 | lin7a          | 0.004883865 | -0.334365216 | -0.254636287 | -0.400398823 | -0.216397551 | downregulated during regeneration - early |
| ENSDART0000019905 | fncl4b         | 0.000292971 | -0.800651937 | -0.746602431 | -0.973680622 | -0.402474596 | downregulated during regeneration - early |
| ENSDART0000019949 | ndrg2          | 0.015961295 | -0.366275522 | -0.294111898 | -0.252300979 | -0.169375948 | downregulated during regeneration - early |
| ENSDART0000020054 | opcml          | 0.001389805 | -0.412711216 | -0.540582472 | -0.347997034 | -0.057254512 | downregulated during regeneration - early |
| ENSDART0000020249 | dusp5          | 0.033661318 | -0.842223248 | -0.88819591  | -1.001072274 | -0.721604289 | downregulated during regeneration - early |
| ENSDART0000020741 | aldoaa         | 0.004379828 | -0.416493866 | -0.444493146 | -0.351916406 | -0.154405211 | downregulated during regeneration - early |
| ENSDART0000021605 | LRRC4C         | 0.002327436 | -0.456880748 | -0.587108705 | -0.299621227 | -0.131466817 | downregulated during regeneration - early |
| ENSDART0000021609 | gad2           | 0.02923464  | -0.376538118 | -0.375877531 | -0.287892544 | -0.231277899 | downregulated during regeneration - early |
| ENSDART0000022290 | mdh1aa         | 0.00652818  | -0.386096556 | -0.387245145 | -0.361974711 | -0.162628891 | downregulated during regeneration - early |
| ENSDART0000022549 | atp1b3a        | 0.005736694 | -0.438514495 | -0.341784188 | -0.389598734 | -0.186751495 | downregulated during regeneration - early |
| ENSDART0000022579 | GABRG3         | 0.002100653 | -0.524427233 | -0.895243712 | -0.602147004 | -0.152848624 | downregulated during regeneration - early |
| ENSDART0000022625 | nrarpb         | 0.033808649 | -0.295040721 | -0.303522559 | -0.284578601 | -0.228026779 | downregulated during regeneration - early |
| ENSDART0000023562 | CAB201041610.1 | 0.000144061 | -1.012987922 | -1.132303657 | -0.526387248 | -0.210938966 | downregulated during regeneration - early |
| ENSDART0000024304 | per3           | 0.008088213 | -0.478794008 | -0.233417732 | -0.352073188 | -0.024889246 | downregulated during regeneration - early |
| ENSDART0000024832 | stat5a         | 0.004077075 | -0.212236095 | -0.408877789 | -0.375060924 | -0.185569558 | downregulated during regeneration - early |
| ENSDART0000025466 | slc18a2        | 0.042155205 | -0.576881609 | -0.281211576 | -0.258781682 | -0.379077041 | downregulated during regeneration - early |
| ENSDART0000026174 | dgh            | 0.000322759 | -0.6307495   | -1.007774241 | -0.588261808 | -0.107017931 | downregulated during regeneration - early |
| ENSDART0000026765 | slc18a3a       | 0.00377171  | -0.342520426 | -0.454539851 | -0.359489571 | -0.310297658 | downregulated during regeneration - early |
| ENSDART0000026766 | aldocb         | 0.007676315 | -0.483629021 | -0.540701781 | -0.406696036 | -0.135568984 | downregulated during regeneration - early |
| ENSDART0000027465 | cacna2d4b      | 0.014868435 | -0.370016882 | -0.141565087 | -0.247577188 | 0.068079685  | downregulated during regeneration - early |
| ENSDART0000028500 | nxn            | 0.008517342 | -0.356492001 | -0.304319321 | -0.337794036 | -0.002781587 | downregulated during regeneration - early |
| ENSDART0000029703 | kcnh1a         | 1.36144E-05 | -0.531746722 | -1.366001544 | -0.565478925 | 0.09193536   | downregulated during regeneration - early |
| ENSDART0000029981 | ppp3cb         | 0.001261708 | -0.453839737 | -0.543662557 | -0.385030051 | 0.007551117  | downregulated during regeneration - early |
| ENSDART0000030811 | cables2b       | 0.004679084 | -0.198257533 | -0.480718843 | -0.449759807 | -0.060172476 | downregulated during regeneration - early |
| ENSDART0000031139 | slc24a4b       | 0.00106989  | -0.756345109 | -1.188291659 | -0.474432561 | -0.06484409  | downregulated during regeneration - early |
| ENSDART0000031265 | rtn4r          | 0.006344596 | -0.75039937  | -0.836146377 | -0.430012914 | -0.160533624 | downregulated during regeneration - early |
| ENSDART0000032695 | asic4a         | 0.021143724 | -0.405928595 | -0.689262684 | -0.527033258 | -0.378352566 | downregulated during regeneration - early |
| ENSDART0000033248 | fam107b        | 0.004517445 | -0.588148397 | -0.439287754 | -0.362004691 | -0.311865235 | downregulated during regeneration - early |
| ENSDART0000033362 | gatad2b        | 0.00857344  | -0.40244942  | -0.286045422 | -0.214483951 | -0.084688348 | downregulated during regeneration - early |
| ENSDART0000034421 | cdk14          | 0.046595201 | -0.37810724  | -0.738234108 | -0.33600573  | -0.064327168 | downregulated during regeneration - early |
| ENSDART0000034737 | cpne8          | 0.000212569 | -0.307817154 | -0.810818352 | -0.660194536 | 0.005050706  | downregulated during regeneration - early |
| ENSDART0000034883 | mcf2a          | 0.007383608 | -0.149015362 | -0.337699782 | -0.173487291 | 0.057006752  | downregulated during regeneration - early |
| ENSDART0000036050 | rs1a           | 0.003706014 | -0.391328986 | -0.392177441 | -0.469736828 | -0.271292581 | downregulated during regeneration - early |
| ENSDART0000036472 | zgc:110852     | 0.003559691 | -0.482143709 | -0.509026678 | -0.613205563 | -0.094495965 | downregulated during regeneration - early |
| ENSDART0000036997 | camk2n1a       | 0.004142036 | -0.377223565 | -0.40737699  | -0.242898936 | -0.23919335  | downregulated during regeneration - early |
| ENSDART0000037007 | tpi1a          | 0.002762116 | -0.595344218 | -0.412573356 | -0.319655345 | -0.136192131 | downregulated during regeneration - early |

|                   |                   |             |              |              |              |              |                                           |
|-------------------|-------------------|-------------|--------------|--------------|--------------|--------------|-------------------------------------------|
| ENSDART0000037922 | slc6a8            | 0.004497123 | -0.298142259 | -0.526146924 | -0.491663812 | -0.167137822 | downregulated during regeneration - early |
| ENSDART0000038290 | crhb              | 0.005277161 | -0.533237668 | -0.584543834 | -0.601107267 | -0.51443145  | downregulated during regeneration - early |
| ENSDART0000039277 | lhfp13            | 0.000949477 | -0.493635642 | -0.41740998  | -0.318633213 | -0.189800628 | downregulated during regeneration - early |
| ENSDART0000039571 | camk2a            | 0.001363478 | -0.838498146 | -0.905374301 | -0.593078838 | -0.446882891 | downregulated during regeneration - early |
| ENSDART0000040086 | pacsin1a          | 0.019909357 | -0.311462824 | -0.286213879 | -0.425986821 | -0.031983095 | downregulated during regeneration - early |
| ENSDART0000040275 | kcnj11            | 0.033377037 | -0.790164361 | -0.507671216 | -0.85342057  | -0.51870362  | downregulated during regeneration - early |
| ENSDART0000040502 | trpc5a            | 0.004129329 | -0.568729425 | -1.014519921 | -0.522696272 | -0.18638518  | downregulated during regeneration - early |
| ENSDART0000040672 | mecp2             | 0.047533941 | -0.242382035 | -0.413395534 | -0.149398689 | -0.148226048 | downregulated during regeneration - early |
| ENSDART000004086  | cacng2a           | 0.015156186 | -0.088843708 | -0.391878721 | -0.181623249 | -0.021159404 | downregulated during regeneration - early |
| ENSDART0000041503 | slc4a4a           | 0.010983086 | -0.308542931 | -0.316588825 | -0.297229141 | -0.158105481 | downregulated during regeneration - early |
| ENSDART0000041861 | syt1a             | 0.033833708 | -0.326937152 | -0.373717465 | -0.346529457 | -0.191055943 | downregulated during regeneration - early |
| ENSDART0000042386 | unm_sa1261        | 0.008933267 | -0.368338169 | -0.259611498 | -0.383565927 | -0.183992374 | downregulated during regeneration - early |
| ENSDART0000043058 | TENM2             | 0.005410022 | -0.559723778 | -0.553182426 | -0.524601572 | -0.11140967  | downregulated during regeneration - early |
| ENSDART0000043180 | gria3b            | 0.000788653 | -0.628974157 | -0.919920549 | -0.567970281 | 0.039022237  | downregulated during regeneration - early |
| ENSDART0000043945 | NA                | 0.013000886 | -0.527606114 | -0.345502165 | -0.38556129  | -0.085040536 | downregulated during regeneration - early |
| ENSDART0000044294 | fryb              | 0.002449444 | -0.196859444 | -0.540115494 | -0.186847147 | -0.085192364 | downregulated during regeneration - early |
| ENSDART0000044388 | NPBWR2            | 0.007828891 | -0.53926233  | -0.49881296  | -0.385102988 | -0.276547602 | downregulated during regeneration - early |
| ENSDART0000044735 | gria1b            | 0.029927553 | -0.281408167 | -0.37749512  | -0.41239512  | -0.179683873 | downregulated during regeneration - early |
| ENSDART0000044896 | camk2d2           | 0.00145694  | -0.471410347 | -0.378784897 | -0.323522916 | -0.120871605 | downregulated during regeneration - early |
| ENSDART0000044986 | rnd1a             | 0.003670956 | -0.894483212 | -0.275620607 | -0.461458    | -0.242681728 | downregulated during regeneration - early |
| ENSDART0000045616 | gabrb1b           | 0.008210772 | -0.290531763 | -0.52893984  | -0.416723119 | -0.192345482 | downregulated during regeneration - early |
| ENSDART0000045842 | rcan3             | 0.002351134 | -0.531033223 | -0.615136042 | -0.34287969  | -0.068102336 | downregulated during regeneration - early |
| ENSDART0000046498 | sema3fa           | 0.004560464 | -0.424113863 | -0.318396861 | -0.293026202 | -0.101692261 | downregulated during regeneration - early |
| ENSDART0000046542 | igf1rb            | 0.011264004 | -0.265329623 | -0.432225627 | -0.135218314 | -0.147354602 | downregulated during regeneration - early |
| ENSDART0000046663 | camta1b           | 0.022220725 | -0.13908238  | -0.543108898 | -0.289499765 | -0.001152787 | downregulated during regeneration - early |
| ENSDART0000047416 | slc4a8            | 0.004215641 | -0.393460236 | -0.539636776 | -0.542467324 | -0.330988764 | downregulated during regeneration - early |
| ENSDART0000047541 | bach1b            | 0.039802589 | -0.343772395 | -0.510091534 | -0.468889885 | -0.333515696 | downregulated during regeneration - early |
| ENSDART0000048036 | gem               | 0.018018574 | -0.746612275 | -0.695957849 | -0.479539177 | -0.330372498 | downregulated during regeneration - early |
| ENSDART0000048365 | ytf6b             | 0.014002312 | -0.461087231 | -0.40037241  | -0.458496339 | -0.153902769 | downregulated during regeneration - early |
| ENSDART0000048432 | dlg4a             | 0.00231226  | -0.380839229 | -0.483618741 | -0.31591813  | -0.034480778 | downregulated during regeneration - early |
| ENSDART0000048775 | mbd3b             | 0.027491007 | -0.291847963 | -0.361950456 | -0.358913558 | -0.222238531 | downregulated during regeneration - early |
| ENSDART0000048819 | rassf2a           | 0.006222767 | -0.204366055 | -0.399787028 | -0.377471637 | -0.118487631 | downregulated during regeneration - early |
| ENSDART0000048893 | pccb3             | 0.004826213 | -0.37198127  | -0.476664366 | -0.345261768 | -0.190932807 | downregulated during regeneration - early |
| ENSDART0000049036 | zgc:92275         | 0.008658551 | -0.447578375 | -0.84153571  | -0.52710535  | -0.386325614 | downregulated during regeneration - early |
| ENSDART0000049240 | tob1a             | 0.008289796 | -0.553621268 | -0.528794995 | -0.629368997 | -0.384085742 | downregulated during regeneration - early |
| ENSDART0000050018 | cnksr1            | 0.010245667 | 0.043033394  | -0.349786212 | -0.053406139 | -0.094004348 | downregulated during regeneration - early |
| ENSDART0000050559 | sh3rf1            | 0.018714496 | -0.402839399 | -0.313691549 | -0.2479685   | -0.17125224  | downregulated during regeneration - early |
| ENSDART0000051723 | si:ch211-193k19.1 | 0.001416864 | -0.524075663 | -0.333228258 | -0.259244771 | -0.088981638 | downregulated during regeneration - early |
| ENSDART0000052083 | fjx1              | 0.030276337 | -0.061315226 | -0.667932816 | -0.149604151 | 0.07387804   | downregulated during regeneration - early |
| ENSDART0000052620 | npy               | 0.000988999 | -0.456788991 | -0.449905237 | -0.529362885 | -0.310086201 | downregulated during regeneration - early |
| ENSDART0000052989 | ache              | 0.010699261 | -0.369275035 | -0.306496087 | -0.342496448 | -0.099646921 | downregulated during regeneration - early |
| ENSDART0000053750 | acs12             | 7.10385E-05 | -0.784570064 | -0.626588121 | -0.673780261 | -0.449722468 | downregulated during regeneration - early |
| ENSDART0000054674 | mtnr1aa           | 0.014726917 | -0.46530953  | -0.508091587 | -0.367618326 | -0.477932737 | downregulated during regeneration - early |
| ENSDART0000054736 | bhlhe23           | 0.004928313 | -0.369485488 | -0.514619457 | -0.390416516 | -0.190127988 | downregulated during regeneration - early |
| ENSDART0000054790 | zmp:000001069     | 0.000507818 | -0.367053782 | -1.254323928 | -0.841864806 | -0.072822598 | downregulated during regeneration - early |
| ENSDART0000055019 | ndufa4            | 0.000829971 | -0.243803126 | -0.403243102 | -0.444723985 | -0.066106721 | downregulated during regeneration - early |
| ENSDART0000055134 | ogfr              | 0.011591036 | -0.383562939 | -0.286066309 | -0.21229445  | -0.172842524 | downregulated during regeneration - early |
| ENSDART0000055262 | cdk5r1a           | 0.023933397 | -0.345552765 | -0.416237328 | -0.217352163 | -0.195826689 | downregulated during regeneration - early |
| ENSDART0000055264 | CA10 (1 of many)  | 0.032319936 | -0.387267589 | -0.307777286 | -0.264643205 | -0.127280824 | downregulated during regeneration - early |
| ENSDART0000055465 | si:ch211-149k23.9 | 0.051826156 | -0.23663044  | -0.394558494 | -0.331258304 | -0.323817823 | downregulated during regeneration - early |
| ENSDART0000055890 | znf385c           | 0.011543549 | -0.397413591 | -0.444425008 | -0.419820845 | -0.297765515 | downregulated during regeneration - early |
| ENSDART0000056035 | PMM1              | 0.019075692 | -0.318342084 | -0.457172695 | -0.421149458 | -0.159828821 | downregulated during regeneration - early |
| ENSDART0000056721 | ldhd              | 0.006978095 | -0.445248015 | -0.387879357 | -0.435006793 | -0.179899207 | downregulated during regeneration - early |
| ENSDART0000056810 | drd1b             | 0.002481856 | -0.453660686 | -0.522513213 | -0.435699921 | -0.247093083 | downregulated during regeneration - early |
| ENSDART0000057258 | slc12a5a          | 0.009167819 | -0.776929597 | -2.750292921 | -0.618148385 | -0.058229169 | downregulated during regeneration - early |
| ENSDART0000057422 | pacsin1a          | 0.016789533 | -0.590114235 | -0.673330755 | -0.518895915 | -0.206589128 | downregulated during regeneration - early |
| ENSDART0000058415 | zmp:000001075     | 0.017815971 | -0.428240629 | -0.582010832 | -0.289943093 | -0.116590577 | downregulated during regeneration - early |
| ENSDART0000058706 | fosaa             | 0.004423084 | -1.574082598 | -1.225695241 | -1.240461281 | -1.154909276 | downregulated during regeneration - early |
| ENSDART0000059446 | znf385b           | 0.027304375 | -0.260906147 | -0.315001382 | -0.161772411 | -0.110285684 | downregulated during regeneration - early |
| ENSDART0000059489 | prmt8b            | 0.00072061  | -0.385132635 | -0.375733065 | -0.525036565 | 0.065426538  | downregulated during regeneration - early |
| ENSDART0000059984 | depor             | 0.033009621 | -0.356805464 | -0.334367455 | -0.324987791 | -0.320690594 | downregulated during regeneration - early |
| ENSDART0000060056 | tpi1b             | 0.004694    | -0.330637537 | -0.371028005 | -0.31545087  | -0.122811105 | downregulated during regeneration - early |
| ENSDART0000060321 | RAMBP1            | 0.003256496 | -0.401526014 | -0.370225897 | -0.385056936 | -0.044799362 | downregulated during regeneration - early |
| ENSDART0000060356 | dgh               | 0.001359425 | -0.649006381 | -0.810232451 | -0.629585196 | -0.212393687 | downregulated during regeneration - early |
| ENSDART0000060946 | sgsm1b            | 0.010421156 | -0.173061984 | -0.355540157 | -0.215401885 | -0.063998625 | downregulated during regeneration - early |
| ENSDART0000062150 | zgc:77752         | 0.038990469 | -0.401367403 | -0.150322453 | -0.162634546 | -0.096457711 | downregulated during regeneration - early |
| ENSDART0000062603 | cadm1b            | 0.040704846 | -0.182938767 | -0.538377364 | -0.267052947 | -0.164493851 | downregulated during regeneration - early |
| ENSDART0000062736 | coasy             | 0.038825302 | -0.31852882  | -0.407402551 | -0.404610538 | -0.370618301 | downregulated during regeneration - early |
| ENSDART0000063551 | ppm1e             | 0.011668571 | -0.4375512   | -0.67599947  | -0.28655858  | -0.160579724 | downregulated during regeneration - early |
| ENSDART0000063703 | si:dkey-71h2.2    | 0.004477335 | -0.547517928 | -0.696070326 | -0.446988451 | -0.222080286 | downregulated during regeneration - early |
| ENSDART0000063704 | crip3             | 0.023735552 | -0.295432006 | -0.264072284 | -0.393391872 | -0.087537117 | downregulated during regeneration - early |
| ENSDART0000063706 | fndc4a            | 1.36144E-05 | -0.898991439 | -1.194204845 | -0.829294946 | -0.104966589 | downregulated during regeneration - early |
| ENSDART0000063779 | efhd1             | 0.000461528 | -0.527832136 | -0.620416333 | -0.244685479 | -0.230757866 | downregulated during regeneration - early |
| ENSDART0000063816 | kcnk3a            | 0.00834001  | -0.460164643 | -0.659361375 | -0.48206205  | -0.175491486 | downregulated during regeneration - early |
| ENSDART0000064241 | nrxn3a            | 0.014683084 | -0.593329637 | -0.86602502  | -0.45366796  | -0.193651725 | downregulated during regeneration - early |

|                   |                    |             |              |              |              |              |                                           |
|-------------------|--------------------|-------------|--------------|--------------|--------------|--------------|-------------------------------------------|
| ENSDART0000064403 | nptnb              | 0.050632772 | -0.282191976 | -0.43563203  | -0.351497687 | -0.147485108 | downregulated during regeneration - early |
| ENSDART0000064866 | prkab1a            | 0.004813371 | -0.370484412 | -0.353103565 | -0.349388814 | -0.328698623 | downregulated during regeneration - early |
| ENSDART0000065361 | etv5b              | 0.019698661 | -0.645686026 | -0.347502384 | -0.293939032 | -0.317696675 | downregulated during regeneration - early |
| ENSDART0000065366 | st6gal1            | 0.005057779 | -0.520593433 | -0.711298232 | -0.60540202  | -0.072634403 | downregulated during regeneration - early |
| ENSDART0000065507 | plppr2b            | 0.00275056  | -0.287217931 | -0.353326082 | -0.20088884  | 0.028481334  | downregulated during regeneration - early |
| ENSDART0000066269 | arl4d              | 0.002710576 | -0.431926082 | -0.429953919 | -0.294676093 | -0.224713874 | downregulated during regeneration - early |
| ENSDART0000066290 | UTS2R              | 0.021144031 | -0.720663714 | -0.982454784 | -0.512077429 | -0.545080013 | downregulated during regeneration - early |
| ENSDART0000066386 | shisa9a            | 0.017384242 | -0.462438855 | -0.347473048 | -0.310604934 | -0.078066291 | downregulated during regeneration - early |
| ENSDART0000066896 | syf1a              | 0.019811481 | -0.255336633 | -0.349305824 | -0.330024338 | -0.178637525 | downregulated during regeneration - early |
| ENSDART0000067190 | tspan9b            | 0.000694227 | -0.605960388 | -0.476716761 | -0.251844268 | -0.266924971 | downregulated during regeneration - early |
| ENSDART0000067211 | gpr37l1b           | 0.009682631 | -0.390917116 | -0.36533905  | -0.206436073 | -0.113142613 | downregulated during regeneration - early |
| ENSDART0000067733 | zgc:77838          | 0.041639821 | -0.192172111 | -0.379046905 | -0.170230593 | -0.131538824 | downregulated during regeneration - early |
| ENSDART0000067741 | cacng6b            | 0.039457626 | -2.498204907 | -1.377375045 | -0.330080653 | -1.191335449 | downregulated during regeneration - early |
| ENSDART0000067762 | MYO1D              | 0.006648495 | -0.207118869 | -0.403579734 | -0.286614596 | -0.314212256 | downregulated during regeneration - early |
| ENSDART0000073588 | kcnj11             | 0.051199639 | -0.465815764 | -0.671487298 | -0.425150531 | -0.293255153 | downregulated during regeneration - early |
| ENSDART0000073617 | opr4xa             | 0.013394015 | -0.377358091 | -0.474333233 | -0.655013246 | -0.269116892 | downregulated during regeneration - early |
| ENSDART0000074685 | glrbb              | 0.001927288 | -0.387255204 | -0.421576892 | -0.370807969 | -0.094075713 | downregulated during regeneration - early |
| ENSDART0000074838 | kcnk3b             | 0.00778428  | -0.808453975 | -0.995140212 | -0.30053552  | -0.689829672 | downregulated during regeneration - early |
| ENSDART0000074936 | gabrr2a            | 0.040026502 | -0.375623148 | -0.534637844 | -0.431940406 | -0.359950744 | downregulated during regeneration - early |
| ENSDART0000075510 | ngb                | 0.004883865 | -0.534714702 | -0.310443771 | -0.511019459 | -0.235764625 | downregulated during regeneration - early |
| ENSDART0000075935 | vtnb               | 0.011844748 | -0.377853158 | -0.395207221 | -0.399371834 | -0.233041975 | downregulated during regeneration - early |
| ENSDART0000075940 | mtnr1ba            | 0.03016157  | -0.423445838 | -1.139676296 | -0.754844062 | -0.657118397 | downregulated during regeneration - early |
| ENSDART0000075974 | ism2b              | 0.049434429 | -0.752954546 | -0.582959852 | -0.548810475 | -0.377147389 | downregulated during regeneration - early |
| ENSDART0000075993 | crf1b              | 0.069455159 | -0.280354395 | -0.577500657 | -0.194615785 | -0.207111517 | downregulated during regeneration - early |
| ENSDART0000076215 | RT35102.1          | 0.0256797   | -0.360410997 | -0.514821634 | -0.137026978 | -0.257442941 | downregulated during regeneration - early |
| ENSDART0000076664 | atp2b1a            | 0.015884799 | -0.283300071 | -0.323367416 | -0.218529441 | -0.07251725  | downregulated during regeneration - early |
| ENSDART0000077805 | gria2a             | 0.012308945 | -0.63140941  | -0.839709321 | -0.362303249 | -0.053629448 | downregulated during regeneration - early |
| ENSDART0000077809 | cyp26c1            | 0.003805801 | -0.796873586 | -0.763455549 | -0.70044496  | -0.582141171 | downregulated during regeneration - early |
| ENSDART0000077823 | lrit3a             | 0.035313407 | -0.408189782 | -0.48516269  | -0.481656788 | -0.455604814 | downregulated during regeneration - early |
| ENSDART0000078249 | knc3a              | 0.004480141 | -0.908848026 | -1.288714191 | -0.644595688 | 0.010477706  | downregulated during regeneration - early |
| ENSDART0000078795 | ahcy1              | 0.001402519 | -0.360916144 | -0.460734164 | -0.414619806 | -0.201451999 | downregulated during regeneration - early |
| ENSDART0000079035 | rap1gap            | 0.009758715 | -0.57187807  | -0.701331328 | -0.299987324 | -0.289210087 | downregulated during regeneration - early |
| ENSDART0000079341 | plch1              | 0.009734608 | -0.457888719 | -0.43639001  | -0.345543016 | -0.155469708 | downregulated during regeneration - early |
| ENSDART0000079454 | vamp2              | 0.027826876 | -0.197978353 | -0.366012835 | -0.326357547 | -0.1060827   | downregulated during regeneration - early |
| ENSDART0000079597 | vps36              | 0.031565534 | -0.205754956 | -0.373190829 | -0.317459289 | -0.134792851 | downregulated during regeneration - early |
| ENSDART0000080430 | gfra2b             | 9.16648E-05 | -0.62088032  | -0.576945607 | -0.392707521 | -0.144958503 | downregulated during regeneration - early |
| ENSDART0000081129 | cdk15              | 4.91848E-05 | -0.731126626 | -0.682923022 | -0.544281357 | -0.253398129 | downregulated during regeneration - early |
| ENSDART0000081797 | sash1b             | 0.031235096 | -0.368433045 | -0.365106826 | -0.357216383 | -0.178826864 | downregulated during regeneration - early |
| ENSDART0000081926 | CU856539.1         | 0.01098705  | -0.250902601 | -0.402416425 | -0.31567263  | -0.091643419 | downregulated during regeneration - early |
| ENSDART0000081978 | KCNJ6              | 0.003763847 | -0.364130454 | -0.389723131 | -0.355694518 | -0.126078935 | downregulated during regeneration - early |
| ENSDART0000081990 | strip2             | 0.005385838 | -0.530994895 | -0.582233551 | -0.263527962 | -0.22210065  | downregulated during regeneration - early |
| ENSDART0000082012 | gsk3aa             | 0.056003609 | -0.41333003  | -0.370003942 | -0.288947953 | -0.203102626 | downregulated during regeneration - early |
| ENSDART0000082142 | EFEMP1 (1 of many) | 0.081611118 | -1.76159347  | -0.849874708 | -0.584181957 | -1.080912576 | downregulated during regeneration - early |
| ENSDART0000082438 | dlgap2a            | 0.01013158  | -0.366533513 | -0.540400426 | -0.257659814 | -0.037294062 | downregulated during regeneration - early |
| ENSDART0000082604 | galnt18b           | 0.073840455 | -0.214631898 | -0.351577935 | -0.246678211 | -0.218706176 | downregulated during regeneration - early |
| ENSDART0000083100 | NA                 | 0.001483339 | -0.514905306 | -0.64333228  | -0.306814422 | -0.178642671 | downregulated during regeneration - early |
| ENSDART0000083407 | b4galnt4a          | 0.056841831 | -0.141610106 | -0.312267637 | -0.129787335 | -0.08625756  | downregulated during regeneration - early |
| ENSDART0000083416 | gabrd              | 0.001981601 | -0.516993342 | -0.41812722  | -0.415766575 | -0.292897654 | downregulated during regeneration - early |
| ENSDART0000083427 | slc25a29           | 0.004497123 | -0.338331576 | -0.636979798 | -0.361185623 | -0.191915619 | downregulated during regeneration - early |
| ENSDART0000083453 | slc32a1            | 0.006674249 | -0.393731273 | -0.378330473 | -0.304655077 | -0.16825712  | downregulated during regeneration - early |
| ENSDART0000083788 | CU633832.1         | 0.021355398 | -0.745373175 | -0.699527481 | -0.49975457  | -0.170614876 | downregulated during regeneration - early |
| ENSDART0000084024 | sv2c               | 0.003671994 | -0.354928985 | -0.65582646  | -0.477522685 | -0.220826118 | downregulated during regeneration - early |
| ENSDART0000084381 | sybu               | 0.003015186 | -0.763177411 | -0.608942869 | -0.49552138  | -0.188366829 | downregulated during regeneration - early |
| ENSDART0000084530 | coro2ba            | 0.034451982 | -0.558160234 | -0.686474796 | -0.264666518 | -0.204619183 | downregulated during regeneration - early |
| ENSDART0000084803 | asic2              | 0.006230689 | -0.588195088 | -0.477145292 | -0.317477641 | -0.106481463 | downregulated during regeneration - early |
| ENSDART0000085121 | sdk2b              | 0.030596624 | -0.222566721 | -0.365719278 | -0.147657392 | -0.012041014 | downregulated during regeneration - early |
| ENSDART0000085438 | rps6ka5            | 0.005012104 | -0.245466951 | -0.387017016 | -0.309352273 | -0.19154274  | downregulated during regeneration - early |
| ENSDART0000085522 | hspb6              | 0.048389146 | -0.63697673  | -0.382982575 | -0.524822831 | -0.392317705 | downregulated during regeneration - early |
| ENSDART0000086117 | kcnab2b            | 0.011382754 | -0.362026581 | -0.574025944 | -0.45188395  | -0.145196155 | downregulated during regeneration - early |
| ENSDART0000086176 | nckap1             | 0.036431263 | -0.438983658 | -0.533344195 | -0.439721489 | -0.241138066 | downregulated during regeneration - early |
| ENSDART0000086181 | cabp7b             | 0.018426524 | -0.513778995 | -0.579329622 | -0.46209057  | -0.104843884 | downregulated during regeneration - early |
| ENSDART0000087196 | zgc:153240         | 0.004497123 | -0.381380177 | -0.392146036 | -0.277166885 | -0.130863015 | downregulated during regeneration - early |
| ENSDART0000087565 | eva1a              | 0.005375255 | -0.378976356 | -0.384921525 | -0.250389955 | -0.168669364 | downregulated during regeneration - early |
| ENSDART0000087654 | adcyc6a            | 0.006256994 | -0.242190723 | -0.49624198  | -0.145481294 | -0.053244608 | downregulated during regeneration - early |
| ENSDART0000088146 | ensab              | 0.029418485 | -0.270112525 | -0.281607362 | -0.344659286 | -0.084313447 | downregulated during regeneration - early |
| ENSDART0000088240 | sybp               | 0.022549623 | -0.232689126 | -0.445901517 | -0.375392134 | -0.149058325 | downregulated during regeneration - early |
| ENSDART0000088270 | yjefn3             | 0.006522424 | -0.490178998 | -0.350279664 | -0.399921095 | -0.213170988 | downregulated during regeneration - early |
| ENSDART0000088881 | glt2a              | 0.019698661 | -0.368814104 | -0.568589271 | -0.278482365 | -0.109167738 | downregulated during regeneration - early |
| ENSDART0000088908 | sigrap1a           | 0.001679054 | -0.173831935 | -0.499543132 | -0.183148374 | 0.021193005  | downregulated during regeneration - early |
| ENSDART0000089033 | lingo3a            | 0.002706926 | -0.421566075 | -0.428623374 | -0.267183911 | -0.077777224 | downregulated during regeneration - early |
| ENSDART0000089126 | thrde.2            | 0.031143163 | -0.409075032 | -0.405058445 | -0.383617798 | -0.218104015 | downregulated during regeneration - early |
| ENSDART0000089748 | rorb               | 0.030623213 | -0.330969943 | -0.539847879 | -0.425468683 | -0.138099942 | downregulated during regeneration - early |
| ENSDART0000089967 | cacna1bb           | 0.093941409 | -0.202836628 | -0.66011593  | -0.329318476 | -0.282649478 | downregulated during regeneration - early |
| ENSDART0000090252 | atp2b3a            | 0.003519185 | -0.293678426 | -0.382019678 | -0.276234519 | -0.034568861 | downregulated during regeneration - early |
| ENSDART0000090335 | hipk2              | 0.016509232 | -0.356266924 | -0.261702878 | -0.185362868 | -0.057591831 | downregulated during regeneration - early |

|                    |                    |             |              |              |              |              |                                           |
|--------------------|--------------------|-------------|--------------|--------------|--------------|--------------|-------------------------------------------|
| ENSDART0000090580  | si:dkey-215k6.1    | 0.007297303 | -0.353341621 | -0.406611115 | -0.330167398 | -0.116132596 | downregulated during regeneration - early |
| ENSDART0000090669  | pleca              | 0.078237713 | -0.254130273 | -0.426440212 | -0.236918819 | -0.12154508  | downregulated during regeneration - early |
| ENSDART0000091151  | neil2b             | 0.000442465 | -0.408104365 | -0.533629775 | -0.525750199 | -0.236120482 | downregulated during regeneration - early |
| ENSDART0000091271  | prkg2l             | 0.030415718 | -0.404320096 | -0.412762377 | -0.544649422 | -0.030408858 | downregulated during regeneration - early |
| ENSDART0000091416  | cntn3a.1           | 0.007676315 | -0.478191534 | -0.246216663 | -0.434975173 | -0.073764559 | downregulated during regeneration - early |
| ENSDART0000091472  | kcnv2b             | 0.007620644 | -0.549604515 | -0.416623158 | -0.289225353 | -0.099467789 | downregulated during regeneration - early |
| ENSDART0000091532  | ndnf               | 0.009217803 | -0.379105533 | -0.357674977 | -0.332342823 | -0.25490154  | downregulated during regeneration - early |
| ENSDART0000091612  | dab2ipa            | 0.015157115 | -0.32378487  | -0.312766229 | -0.160534626 | -0.215968275 | downregulated during regeneration - early |
| ENSDART0000091683  | alkbh5             | 0.020455943 | -0.400075016 | -0.448742364 | -0.161106699 | -0.178285375 | downregulated during regeneration - early |
| ENSDART0000092013  | tmtc1              | 0.011155618 | -0.379958165 | -0.299353758 | -0.293525457 | -0.123093715 | downregulated during regeneration - early |
| ENSDART0000092051  | CABZ01081780.1     | 0.001500572 | -0.497076796 | -0.683547714 | -0.447049069 | -0.155316145 | downregulated during regeneration - early |
| ENSDART0000092183  | lrrc3b             | 0.025950704 | -0.469734111 | -0.850621377 | -0.496353665 | -0.22903801  | downregulated during regeneration - early |
| ENSDART0000092356  | neto1              | 0.016069216 | -0.404606374 | -0.302098716 | -0.383296194 | -0.272667962 | downregulated during regeneration - early |
| ENSDART0000092493  | ptprt              | 0.007621679 | -0.175495642 | -0.444255461 | -0.308001112 | -0.058909837 | downregulated during regeneration - early |
| ENSDART0000092647  | cers1              | 0.035286858 | -0.35221666  | -0.292832737 | -0.390981877 | -0.135220693 | downregulated during regeneration - early |
| ENSDART0000092691  | pea15              | 0.000272535 | -0.578361557 | -0.742039167 | -0.342285902 | -0.180997926 | downregulated during regeneration - early |
| ENSDART0000092936  | TULP3              | 0.019409502 | -0.257622072 | -0.196815312 | -0.318097587 | -0.153320475 | downregulated during regeneration - early |
| ENSDART0000097685  | LINGO3 (1 of many) | 0.000592646 | -0.608919806 | -0.847171007 | -0.317394062 | -0.126526617 | downregulated during regeneration - early |
| ENSDART0000097770  | gc3                | 0.022797575 | -0.462816548 | -0.433977737 | -0.284956472 | -0.124147363 | downregulated during regeneration - early |
| ENSDART0000098424  | trib2              | 0.000168321 | -0.755876906 | -0.434835466 | -0.414057266 | -0.366344874 | downregulated during regeneration - early |
| ENSDART0000098639  | cntn5              | 0.018537916 | -0.259764888 | -0.493723855 | -0.530432667 | -0.172558087 | downregulated during regeneration - early |
| ENSDART0000098668  | abcc8b             | 0.045086702 | -0.217525237 | -0.529877646 | -0.409188595 | -0.288785069 | downregulated during regeneration - early |
| ENSDART0000099202  | igsf11             | 0.016255169 | -0.183727476 | -0.31314564  | -0.202768681 | -0.036422441 | downregulated during regeneration - early |
| ENSDART0000099235  | rnf4a              | 0.003130236 | -0.234703995 | -0.37643632  | -0.256248531 | 0.012942846  | downregulated during regeneration - early |
| ENSDART0000099869  | slc17a7b           | 0.012556905 | -0.359089552 | -0.531552161 | -0.360552754 | 0.022409885  | downregulated during regeneration - early |
| ENSDART00000100074 | plxb3a             | 0.034362521 | -0.314908702 | -0.751877287 | -0.359257757 | -0.077459645 | downregulated during regeneration - early |
| ENSDART00000100223 | zgc:91860          | 0.02057139  | -0.412727201 | -0.311203152 | -0.280203316 | -0.243367869 | downregulated during regeneration - early |
| ENSDART00000100290 | napbb              | 0.006047456 | -0.403034353 | -0.312472409 | -0.341096083 | -0.127811116 | downregulated during regeneration - early |
| ENSDART00000100327 | nptx1l             | 0.010245667 | -0.348659958 | -0.433202096 | -0.393251042 | -0.286427391 | downregulated during regeneration - early |
| ENSDART00000100639 | chrm4a             | 0.001996892 | -0.541979173 | -0.464947812 | -0.239039654 | -0.216630506 | downregulated during regeneration - early |
| ENSDART00000100681 | ncam2              | 0.01695739  | -0.42007768  | -0.748629002 | -0.327699832 | -0.08364547  | downregulated during regeneration - early |
| ENSDART00000101231 | sy7b               | 0.02142158  | -0.85705254  | -2.266705376 | -0.529986528 | 0.010282974  | downregulated during regeneration - early |
| ENSDART00000101948 | GJA9 (1 of many)   | 0.063141225 | -0.638779519 | -0.432316335 | -0.423080448 | -0.46097286  | downregulated during regeneration - early |
| ENSDART00000102445 | clasp1a            | 0.056020682 | -0.444419251 | -0.511465397 | -0.218813787 | -0.372606163 | downregulated during regeneration - early |
| ENSDART00000102461 | rgs8               | 0.000273326 | -0.536939066 | -0.575929959 | -0.463779418 | -0.057720257 | downregulated during regeneration - early |
| ENSDART00000102790 | glr1ba             | 0.002147221 | -0.477875363 | -0.33299196  | -0.36632817  | -0.172063586 | downregulated during regeneration - early |
| ENSDART00000102881 | fam43b             | 0.029887325 | -0.413239873 | -0.283572592 | -0.358392622 | -0.273570929 | downregulated during regeneration - early |
| ENSDART00000103532 | kcnh5a             | 0.002023943 | -0.481841968 | -0.667651405 | -0.403869416 | -0.116032422 | downregulated during regeneration - early |
| ENSDART00000103549 | skib               | 0.029718853 | -0.170611371 | -0.408422527 | -0.193614247 | -0.134954723 | downregulated during regeneration - early |
| ENSDART00000103640 | hey1               | 0.023203992 | -0.385659584 | -0.747117397 | -0.392306381 | -0.416692063 | downregulated during regeneration - early |
| ENSDART00000103646 | kcnq2              | 0.000233744 | -0.538883844 | -0.646084515 | -0.39646557  | 0.008271529  | downregulated during regeneration - early |
| ENSDART00000103894 | cacng8b            | 3.32082E-05 | -0.589374624 | -0.680390231 | -0.379441318 | -0.105621743 | downregulated during regeneration - early |
| ENSDART00000103980 | crip2              | 0.004627449 | -0.517107368 | -0.364195263 | -0.546778441 | -0.267901424 | downregulated during regeneration - early |
| ENSDART00000104008 | dtbnp1b            | 0.006824859 | -0.424284075 | -0.457257716 | -0.424822836 | -0.199214695 | downregulated during regeneration - early |
| ENSDART00000104027 | rims3              | 0.000442465 | -0.345163808 | -0.27584123  | -0.314103014 | -0.01029762  | downregulated during regeneration - early |
| ENSDART00000104293 | pex5la             | 8.79987E-05 | -0.678333589 | -0.710207201 | -0.577955484 | -0.480904778 | downregulated during regeneration - early |
| ENSDART00000104481 | slc17a7a           | 0.009884056 | -0.380361502 | -0.377656856 | -0.259723773 | -0.186490981 | downregulated during regeneration - early |
| ENSDART00000104722 | cdk5r2a            | 0.016942898 | -0.371112934 | -0.317321269 | -0.137896092 | -0.229143186 | downregulated during regeneration - early |
| ENSDART00000104828 | gtbbp2b            | 0.002166891 | -0.421398738 | -0.385176207 | -0.273058228 | -0.083654585 | downregulated during regeneration - early |
| ENSDART00000105477 | lrrtm2             | 0.001866651 | -0.540265042 | -0.543880814 | -0.470126158 | -0.070951006 | downregulated during regeneration - early |
| ENSDART00000105866 | si:ch73-213k20.5   | 0.001847721 | -0.515754761 | -0.874847543 | -0.892891327 | -0.392973916 | downregulated during regeneration - early |
| ENSDART00000106096 | drd1a              | 0.032267182 | -0.279465728 | -0.508847304 | -0.2349577   | -0.295766526 | downregulated during regeneration - early |
| ENSDART00000106186 | prex2              | 0.010817469 | -0.375401587 | -0.26106515  | -0.274390577 | -0.295066887 | downregulated during regeneration - early |
| ENSDART00000108507 | CSMD3              | 0.008588572 | -0.201722796 | -0.640032982 | -0.257154173 | 0.075603806  | downregulated during regeneration - early |
| ENSDART00000108574 | gramd1bb           | 0.016102005 | -0.232214076 | -0.405839915 | -0.354417408 | -0.144413075 | downregulated during regeneration - early |
| ENSDART00000108814 | nrip2              | 0.024870229 | -0.213998541 | -0.302896779 | -0.276048404 | -0.173620142 | downregulated during regeneration - early |
| ENSDART00000108959 | RNF208             | 0.003573129 | -0.615021133 | -0.757500788 | -0.372077015 | -0.309696014 | downregulated during regeneration - early |
| ENSDART00000108990 | pex5lb             | 0.015010849 | -0.323313621 | -0.539021494 | -0.34249137  | -0.198103063 | downregulated during regeneration - early |
| ENSDART00000109014 | GJC1               | 0.052919095 | -0.38880893  | -0.552238053 | -0.31502822  | -0.300328618 | downregulated during regeneration - early |
| ENSDART00000109044 | grm8a              | 0.000415801 | -0.470031444 | -0.746629562 | -0.459544685 | -0.031467357 | downregulated during regeneration - early |
| ENSDART00000109224 | CCKBR (1 of many)  | 0.012371829 | -0.56783642  | -0.51463677  | -0.498556224 | -0.286398879 | downregulated during regeneration - early |
| ENSDART00000109257 | RASGRF1            | 7.10385E-05 | -0.570969407 | -0.754386918 | -0.426488142 | -0.098297531 | downregulated during regeneration - early |
| ENSDART00000109308 | si:ch73-60h1.1     | 0.05270735  | -0.222101504 | -0.315217201 | -0.340339223 | -0.206722759 | downregulated during regeneration - early |
| ENSDART00000109420 | kcnip1b            | 2.98725E-05 | -0.712749849 | -0.701262469 | -0.816924162 | -0.561177799 | downregulated during regeneration - early |
| ENSDART00000109486 | gnrc5ba            | 0.001396814 | -0.628238673 | -0.569388482 | -0.508289237 | -0.226450363 | downregulated during regeneration - early |
| ENSDART00000109537 | snpbh              | 0.000529346 | -0.466057723 | -0.636087511 | -0.318006337 | -0.040021342 | downregulated during regeneration - early |
| ENSDART00000109732 | amigo1             | 0.034874709 | -0.336374535 | -0.536025942 | -0.442802906 | -0.174075192 | downregulated during regeneration - early |
| ENSDART00000109990 | abhd15a            | 0.035729768 | -0.466192052 | -0.318128979 | -0.316342009 | -0.301397533 | downregulated during regeneration - early |
| ENSDART00000110016 | ube2ql1            | 0.022726575 | -0.274241146 | -0.513839036 | -0.485900432 | -0.131799131 | downregulated during regeneration - early |
| ENSDART00000110080 | aatka              | 0.025606413 | -0.15444172  | -0.531359629 | -0.399426039 | -0.066680489 | downregulated during regeneration - early |
| ENSDART00000110092 | mdga1              | 0.024397386 | -0.307586742 | -0.496736277 | -0.237358341 | -0.048338544 | downregulated during regeneration - early |
| ENSDART00000110383 | map7a              | 0.000639961 | -0.540598501 | -0.669475763 | -0.490700501 | -0.102714716 | downregulated during regeneration - early |
| ENSDART00000110432 | kazna              | 0.080551232 | -0.43352738  | -0.292382864 | -0.217890679 | -0.318143053 | downregulated during regeneration - early |
| ENSDART00000110447 | slitrk3b           | 0.024397386 | -0.707318961 | -0.905108657 | -0.279729387 | -0.217159944 | downregulated during regeneration - early |
| ENSDART00000110547 | ANKRD34A           | 0.001359425 | -0.459666228 | -0.579840169 | -0.409587984 | -0.250229823 | downregulated during regeneration - early |

|                    |                    |             |              |              |              |              |                                           |
|--------------------|--------------------|-------------|--------------|--------------|--------------|--------------|-------------------------------------------|
| ENSDART00000110789 | esyt2b             | 0.006322758 | -0.389945342 | -0.213760019 | -0.33183342  | -0.035634516 | downregulated during regeneration - early |
| ENSDART00000110821 | ttc19              | 0.010842    | -0.356526006 | -0.209564592 | -0.274076967 | -0.065932254 | downregulated during regeneration - early |
| ENSDART00000110854 | elk1               | 0.059586248 | -0.317422178 | -0.365267467 | -0.144808984 | -0.160403171 | downregulated during regeneration - early |
| ENSDART00000110879 | magi2b             | 0.020773351 | -0.318025437 | -0.557603079 | -0.245924365 | -0.15150652  | downregulated during regeneration - early |
| ENSDART00000110974 | zdhhc12b           | 0.011929276 | -0.321463982 | -0.336778233 | -0.359206693 | -0.209775575 | downregulated during regeneration - early |
| ENSDART00000110976 | col19a1            | 0.036381892 | -0.113310455 | -0.554338462 | -0.336015886 | -0.135833904 | downregulated during regeneration - early |
| ENSDART00000111055 | kcn4               | 0.004463264 | -0.237309303 | -0.448087799 | -0.436530246 | -0.275701844 | downregulated during regeneration - early |
| ENSDART00000111080 | adgrb3             | 0.02511369  | -0.692483265 | -0.604853517 | -0.34586076  | -0.181234915 | downregulated during regeneration - early |
| ENSDART00000111111 | nlg4b              | 0.015044537 | -0.558022607 | -0.771924705 | -0.300759795 | -0.167214796 | downregulated during regeneration - early |
| ENSDART00000111234 | gdpd5a             | 0.025523567 | -0.267734676 | -0.323349922 | -0.30731905  | -0.184332435 | downregulated during regeneration - early |
| ENSDART00000111261 | cdh24b             | 0.001978324 | -0.501530291 | -0.712397312 | -0.362295258 | -0.168930493 | downregulated during regeneration - early |
| ENSDART00000111323 | AMIGO3 (1 of many) | 0.023492759 | -0.274114526 | -0.487248865 | -0.174614423 | -0.21591611  | downregulated during regeneration - early |
| ENSDART00000111456 | rbm10              | 0.014371639 | -0.2435311   | -0.244375112 | -0.319750026 | -0.111931812 | downregulated during regeneration - early |
| ENSDART00000111509 | CABZ01072096.1     | 0.079186307 | -0.19271783  | -0.32713696  | -0.269302922 | -0.183488656 | downregulated during regeneration - early |
| ENSDART00000111571 | rap1gap2b          | 0.001659006 | -0.543266541 | -0.656699315 | -0.515603594 | -0.222139298 | downregulated during regeneration - early |
| ENSDART00000111636 | DTX4 (1 of many)   | 2.01848E-05 | -1.011696111 | -1.148570348 | -0.809918586 | -0.692193186 | downregulated during regeneration - early |
| ENSDART00000111656 | gpr78a             | 0.000190025 | -0.727925057 | -0.963113505 | -0.708360358 | -0.204121228 | downregulated during regeneration - early |
| ENSDART00000111759 | zmp:0000000794     | 0.02020282  | -0.428447438 | -0.466968786 | -0.39807432  | -0.23111401  | downregulated during regeneration - early |
| ENSDART00000111823 | GRIK3              | 0.003171283 | -0.298812703 | -0.633195231 | -0.313411843 | -0.167732562 | downregulated during regeneration - early |
| ENSDART00000111841 | BX248501.1         | 0.00748053  | -0.587056195 | -1.220156186 | -0.870300177 | -0.776464497 | downregulated during regeneration - early |
| ENSDART00000112106 | fam155a            | 0.010271025 | -0.397020883 | -0.491375873 | -0.258307362 | -0.051593808 | downregulated during regeneration - early |
| ENSDART00000112296 | si:ch211-152n14.4  | 0.042906616 | -3.416151322 | -1.061691573 | -0.948841593 | -2.14718796  | downregulated during regeneration - early |
| ENSDART00000112299 | gpr37a             | 0.027970823 | -0.365323083 | -0.2884934   | -0.319868677 | -0.150652035 | downregulated during regeneration - early |
| ENSDART00000112301 | thrde.1            | 0.014638227 | -0.264986832 | -0.332160295 | -0.182975887 | -0.056935825 | downregulated during regeneration - early |
| ENSDART00000112441 | tlr7               | 0.00039492  | -0.49393668  | -0.654080017 | -0.57399465  | -0.158959649 | downregulated during regeneration - early |
| ENSDART00000112646 | CNNM1              | 0.000705938 | -0.428104026 | -0.544400388 | -0.592385966 | -0.267977747 | downregulated during regeneration - early |
| ENSDART00000112655 | nfasca             | 0.000530673 | -0.501256457 | -0.441261682 | -0.289256026 | -0.116172993 | downregulated during regeneration - early |
| ENSDART00000112735 | fam19a1a           | 0.000783264 | -0.689638571 | -0.889095001 | -0.657230812 | -0.483951597 | downregulated during regeneration - early |
| ENSDART00000112743 | nmbb               | 0.023560515 | -0.255890888 | -1.177861162 | -0.767211345 | -0.814299265 | downregulated during regeneration - early |
| ENSDART00000113004 | CABZ01068356.1     | 0.025858283 | -0.41749624  | -0.503262627 | -0.597219984 | -0.132734415 | downregulated during regeneration - early |
| ENSDART00000113058 | gpsm2              | 0.017032668 | -0.158548143 | -0.583640034 | -0.403831438 | -0.106682634 | downregulated during regeneration - early |
| ENSDART00000113162 | pi4kaa             | 0.016474673 | -0.145989753 | -0.358429295 | -0.235575302 | -0.007193852 | downregulated during regeneration - early |
| ENSDART00000113196 | si:ch211-157b11.14 | 0.011627674 | -0.299973945 | -0.39773998  | -0.291303207 | -0.069868393 | downregulated during regeneration - early |
| ENSDART00000113280 | FRMD5 (1 of many)  | 0.004407873 | -0.439670364 | -0.372637017 | -0.247112316 | -0.218940122 | downregulated during regeneration - early |
| ENSDART00000113454 | chgb               | 0.034869075 | -0.341137392 | -0.331982228 | -0.294276744 | -0.206705528 | downregulated during regeneration - early |
| ENSDART00000114083 | mcf2la             | 0.003137832 | -0.277595318 | -0.392280599 | -0.224516886 | 0.025969597  | downregulated during regeneration - early |
| ENSDART00000114117 | necab1             | 0.017561897 | -0.468499392 | -0.405674747 | -0.46743135  | -0.222378141 | downregulated during regeneration - early |
| ENSDART00000114322 | rusc1              | 0.045517543 | -0.055969033 | -0.296840251 | -0.124744669 | -0.048299568 | downregulated during regeneration - early |
| ENSDART00000114442 | fn/dc5b            | 0.001847721 | -0.498984664 | -0.658119927 | -0.45669978  | -0.18817484  | downregulated during regeneration - early |
| ENSDART00000114660 | opn8b              | 0.000645779 | -0.615308217 | -0.695080703 | -0.641485332 | -0.112308149 | downregulated during regeneration - early |
| ENSDART00000114711 | sorcs1             | 0.000116387 | -0.736062495 | -0.897966489 | -0.594713886 | -0.208228471 | downregulated during regeneration - early |
| ENSDART00000114748 | vip                | 0.00097129  | -0.375915262 | -0.449108971 | -0.514462327 | -0.417228927 | downregulated during regeneration - early |
| ENSDART00000114750 | gabrb2             | 0.00023578  | -0.56997023  | -0.610789713 | -0.475013901 | -0.067415538 | downregulated during regeneration - early |
| ENSDART00000115058 | pbxp1a             | 0.00153043  | -0.476509078 | -0.442420659 | -0.523364891 | -0.310557938 | downregulated during regeneration - early |
| ENSDART00000115118 | tns1a              | 5.24617E-05 | -0.409165389 | -0.800200161 | -0.457588882 | -0.074958883 | downregulated during regeneration - early |
| ENSDART00000115138 | rapgef4            | 0.007642045 | -0.335306767 | -0.551146979 | -0.593390846 | -0.144257686 | downregulated during regeneration - early |
| ENSDART00000115161 | reps2              | 0.075212446 | -0.084468471 | -0.327140094 | -0.166340372 | -0.127803804 | downregulated during regeneration - early |
| ENSDART00000115278 | cx47.1             | 0.000962944 | -0.445735222 | -0.554690047 | -0.399294096 | -0.241214414 | downregulated during regeneration - early |
| ENSDART00000115365 | rassf10a           | 0.008044263 | -0.525931221 | -0.509933384 | -0.256813636 | -0.202027084 | downregulated during regeneration - early |
| ENSDART00000121457 | lhb                | 0.006197253 | -0.556077202 | -0.419617758 | -0.340252817 | -0.354555634 | downregulated during regeneration - early |
| ENSDART00000121496 | gpr153             | 0.022523327 | -0.22286471  | -0.331603234 | -0.24476212  | -0.082544732 | downregulated during regeneration - early |
| ENSDART00000121503 | cxpl3b             | 0.010056242 | -0.427974445 | -0.393865119 | -0.470572672 | -0.340193244 | downregulated during regeneration - early |
| ENSDART00000121684 | nat8l              | 0.000470359 | -0.712971152 | -0.75865271  | -0.423007329 | -0.36098028  | downregulated during regeneration - early |
| ENSDART00000121826 | bean1              | 0.000596344 | -0.425046714 | -0.600778843 | -0.413029577 | -0.180932047 | downregulated during regeneration - early |
| ENSDART00000121872 | mast3b             | 0.013889645 | -0.277342703 | -0.556828614 | -0.261994844 | -0.168334337 | downregulated during regeneration - early |
| ENSDART00000122081 | sybu               | 0.000261206 | -0.707212841 | -0.524661917 | -0.600466578 | -0.221891711 | downregulated during regeneration - early |
| ENSDART00000122429 | klf15              | 0.006222767 | -0.341190152 | -0.616050077 | -0.578895446 | -0.337948098 | downregulated during regeneration - early |
| ENSDART00000122454 | citb               | 0.001304993 | -0.619522503 | -1.363556906 | -0.83905374  | -0.294671991 | downregulated during regeneration - early |
| ENSDART00000122654 | rnd1a              | 0.045949377 | -0.834540827 | -0.662552714 | -0.915729348 | -0.640521788 | downregulated during regeneration - early |
| ENSDART00000122682 | cabp1b             | 0.009667225 | -0.294760944 | -0.547217913 | -0.530251845 | -0.289128709 | downregulated during regeneration - early |
| ENSDART00000122747 | tmem30aa           | 0.01889397  | -0.229416393 | -0.299526834 | -0.201671762 | -0.059032826 | downregulated during regeneration - early |
| ENSDART00000123359 | nlg1               | 0.001676296 | -0.188766802 | -0.577714477 | -0.350080443 | 0.032932651  | downregulated during regeneration - early |
| ENSDART00000123534 | cacna1g            | 0.007400402 | -0.255311686 | -0.53660486  | -0.469326401 | -0.279013734 | downregulated during regeneration - early |
| ENSDART00000123797 | pcp4b              | 0.000180202 | -0.598256523 | -0.489822031 | -0.568163011 | -0.081816834 | downregulated during regeneration - early |
| ENSDART00000123844 | si:dkey-77f5.3     | 0.019467351 | -4.277427291 | -0.495308507 | -0.670171681 | -0.698447042 | downregulated during regeneration - early |
| ENSDART00000123950 | PRIMA1             | 0.001128218 | -0.578840887 | -0.634067967 | -0.550475282 | -0.159964437 | downregulated during regeneration - early |
| ENSDART00000124298 | klhl29             | 0.013613126 | -0.069964723 | -0.409007114 | -0.117673983 | 0.023652831  | downregulated during regeneration - early |
| ENSDART00000124480 | adgr1a             | 0.006467002 | -0.174945207 | -0.479872966 | -0.185768365 | 0.06038548   | downregulated during regeneration - early |
| ENSDART00000124582 | napbb              | 0.006047456 | -0.403034353 | -0.312472409 | -0.341096083 | -0.127811116 | downregulated during regeneration - early |
| ENSDART00000124662 | rtn4a              | 0.027810244 | -0.503868889 | -0.627866078 | -0.609450822 | -0.190620657 | downregulated during regeneration - early |
| ENSDART00000124708 | gabra6b            | 0.028541039 | -0.347504052 | -0.445856563 | -0.426704654 | -0.236544239 | downregulated during regeneration - early |
| ENSDART00000124876 | VSTM2B             | 0.000962944 | -0.453041699 | -0.513162057 | -0.416504873 | -0.137923272 | downregulated during regeneration - early |
| ENSDART00000125344 | skilb              | 0.010360832 | -0.241964121 | -0.627384358 | -0.493621211 | -0.368838752 | downregulated during regeneration - early |
| ENSDART00000125531 | plppr5a            | 0.001540499 | -0.48592962  | -0.468686144 | -0.487868254 | -0.311270154 | downregulated during regeneration - early |
| ENSDART00000125766 | camkvb             | 0.000261206 | -0.518737667 | -0.560273381 | -0.364168693 | -0.104855004 | downregulated during regeneration - early |

|                    |                     |             |              |               |              |              |                                           |
|--------------------|---------------------|-------------|--------------|---------------|--------------|--------------|-------------------------------------------|
| ENSDART00000125900 | hs3st3b1b           | 0.005535018 | -0.2288214   | -0.294028167  | -0.23141286  | 0.023426889  | downregulated during regeneration - early |
| ENSDART00000126300 | shisa8b             | 0.024559038 | -0.373408846 | -0.464508355  | -0.412634146 | -0.258826308 | downregulated during regeneration - early |
| ENSDART00000126314 | pcdh8               | 0.024963085 | -0.25826413  | -0.454008614  | -0.231067015 | -0.062706758 | downregulated during regeneration - early |
| ENSDART00000126559 | rap1gap2a           | 0.025646401 | -0.313212246 | -0.347504992  | -0.446138134 | -0.231468434 | downregulated during regeneration - early |
| ENSDART00000126739 | tspan5a             | 0.010049723 | -0.28156215  | -0.24229244   | -0.35515584  | -0.059588327 | downregulated during regeneration - early |
| ENSDART00000126845 | ldb1a               | 0.021507957 | -0.250500011 | -0.460439315  | -0.246081535 | -0.230460175 | downregulated during regeneration - early |
| ENSDART00000126966 | esrrga              | 0.017679749 | -0.248566713 | -0.265310961  | -0.321308408 | -0.070523791 | downregulated during regeneration - early |
| ENSDART00000127062 | egr3                | 0.052026135 | -1.907539966 | -1.048685041  | -1.405658043 | -1.087307214 | downregulated during regeneration - early |
| ENSDART00000127144 | cacna2d2a           | 0.013891126 | -0.206435603 | -0.394190367  | -0.167540436 | 0.000520565  | downregulated during regeneration - early |
| ENSDART00000127167 | fam217b             | 0.004391006 | -0.253255723 | -0.39768374   | -0.389011868 | -0.208058743 | downregulated during regeneration - early |
| ENSDART00000127219 | FAM155A (1 of many) | 0.037495039 | -0.247003441 | -0.575960705  | -0.390291652 | -0.269667553 | downregulated during regeneration - early |
| ENSDART00000127236 | syt13               | 7.44856E-05 | -0.555822206 | -0.585950845  | -0.738809627 | -0.549910893 | downregulated during regeneration - early |
| ENSDART00000127426 | ERBB4 (1 of many)   | 0.006128742 | -0.100134914 | -0.701677799  | -0.360350675 | -0.397963746 | downregulated during regeneration - early |
| ENSDART00000127428 | pel13               | 0.049273759 | -0.233448958 | -0.50115077   | -0.383840384 | -0.13792159  | downregulated during regeneration - early |
| ENSDART00000127467 | pygmb               | 0.000803251 | -0.413201582 | -0.432147367  | -0.560055907 | -0.134010249 | downregulated during regeneration - early |
| ENSDART00000127506 | si:ch73-380n15.2    | 0.004844187 | -0.654968439 | -0.466259045  | -0.336236181 | -0.320196074 | downregulated during regeneration - early |
| ENSDART00000127513 | znf385d             | 0.079618695 | -0.506377127 | -0.828614957  | -0.387596815 | -0.346943547 | downregulated during regeneration - early |
| ENSDART00000128198 | scn12aa             | 0.032530799 | -0.298887564 | -0.309751416  | -0.23551982  | -0.15404656  | downregulated during regeneration - early |
| ENSDART00000128223 | CHCHD5              | 0.048304569 | -0.405489857 | -0.54000056   | -0.416697607 | -0.210022955 | downregulated during regeneration - early |
| ENSDART00000128224 | FO904873.1          | 0.031307521 | -0.267293261 | -0.580808884  | -0.319669262 | -0.131136583 | downregulated during regeneration - early |
| ENSDART00000128807 | ggr2a               | 0.000870998 | -0.50401992  | -0.32421881   | -0.337086094 | -0.059033497 | downregulated during regeneration - early |
| ENSDART00000128959 | zgc:113223          | 0.022614665 | -1.993126278 | -0.750526857  | -1.059101824 | -0.610323514 | downregulated during regeneration - early |
| ENSDART00000129058 | rheb                | 0.002834268 | -0.430188972 | -0.312082399  | -0.301953935 | -0.04976624  | downregulated during regeneration - early |
| ENSDART00000129202 | DDX17               | 0.027985198 | -0.231356945 | -0.275266303  | -0.31249155  | -0.24318473  | downregulated during regeneration - early |
| ENSDART00000129498 | mef2d               | 0.03679078  | -0.188451231 | -0.381445449  | -0.263610552 | -0.197973462 | downregulated during regeneration - early |
| ENSDART00000130215 | TMEM179 (1 of many) | 0.028527553 | -0.219747105 | -0.315705451  | -0.194562459 | -0.061125473 | downregulated during regeneration - early |
| ENSDART00000130393 | tlr7                | 0.010379183 | -0.687566787 | -0.954352742  | -0.823581986 | -0.270839916 | downregulated during regeneration - early |
| ENSDART00000130881 | gabrr2a             | 0.025544321 | -0.366410023 | -0.492281459  | -0.409834    | -0.272101123 | downregulated during regeneration - early |
| ENSDART00000130891 | camk4               | 0.000560128 | -0.554565795 | -0.502410128  | -0.607057653 | -0.157488548 | downregulated during regeneration - early |
| ENSDART00000130977 | mtcl1               | 0.038066989 | -0.152016911 | -0.472594538  | -0.24239267  | -0.004366794 | downregulated during regeneration - early |
| ENSDART00000131134 | si:ch211-206a7.2    | 0.008848885 | -0.226522125 | -0.472315068  | -0.371394997 | -0.101330709 | downregulated during regeneration - early |
| ENSDART00000131204 | asap1b              | 0.001304993 | -0.546891821 | -0.455253903  | -0.26913051  | -0.092257648 | downregulated during regeneration - early |
| ENSDART00000131323 | si:dkey-193c22.1    | 0.006648495 | -0.375872197 | -0.187390024  | -0.399004983 | -0.194977152 | downregulated during regeneration - early |
| ENSDART00000131361 | kcnip3b             | 0.008595135 | -0.353450144 | -1.035812483  | -0.692091767 | -0.071599751 | downregulated during regeneration - early |
| ENSDART00000131478 | kcnab1a             | 0.005028852 | -0.495628945 | -0.276495434  | -0.300290472 | -0.132892856 | downregulated during regeneration - early |
| ENSDART00000131506 | cdh6                | 0.022814815 | -0.336043184 | -0.313603925  | -0.315311457 | -0.136816058 | downregulated during regeneration - early |
| ENSDART00000131866 | trhra               | 0.014686352 | -0.77311942  | -0.482590954  | -0.518111078 | -0.348001173 | downregulated during regeneration - early |
| ENSDART00000132387 | pvalb6              | 2.98725E-05 | -0.612280143 | -0.883743713  | -0.424014361 | -0.028285642 | downregulated during regeneration - early |
| ENSDART00000132411 | si:ch1073-184j22.2  | 0.001677265 | -0.765110378 | -1.0433591    | -0.590491476 | -0.153408732 | downregulated during regeneration - early |
| ENSDART00000132522 | syt13               | 0.015571917 | -0.475976654 | -0.458152818  | -0.514134367 | -0.475986362 | downregulated during regeneration - early |
| ENSDART00000132582 | map4l               | 0.000829135 | -0.700979622 | -0.493129551  | -0.385069171 | -0.268022699 | downregulated during regeneration - early |
| ENSDART00000132767 | pxdca               | 0.019460106 | -0.518773739 | -0.198850875  | -0.436310873 | -0.094674576 | downregulated during regeneration - early |
| ENSDART00000132829 | inadl               | 0.020169482 | -0.343759067 | -0.387749769  | -0.321781319 | -0.246918999 | downregulated during regeneration - early |
| ENSDART00000132838 | ank1a               | 7.52983E-05 | -1.15020902  | -1.58246422   | -0.789622662 | -0.12782961  | downregulated during regeneration - early |
| ENSDART00000132911 | wvc2l               | 0.004885993 | -0.573360674 | -0.839884971  | -0.564408735 | 0.020047377  | downregulated during regeneration - early |
| ENSDART00000133028 | mus81               | 0.049533299 | -0.28108498  | -0.562830421  | -0.307741383 | -0.072240912 | downregulated during regeneration - early |
| ENSDART00000133099 | zgc:123105          | 0.003047993 | -0.457591599 | -0.29947281   | -0.397070368 | -0.177964487 | downregulated during regeneration - early |
| ENSDART00000133325 | nell2b              | 0.000401619 | -0.450808659 | -0.507896343  | -0.516937003 | -0.181021434 | downregulated during regeneration - early |
| ENSDART00000133487 | fosb                | 0.034512759 | -0.802872207 | -1.273781011  | -0.772506712 | -0.914864674 | downregulated during regeneration - early |
| ENSDART00000133644 | magi2a              | 0.001489209 | -0.426844627 | -0.586214992  | -0.344780913 | 0.065236587  | downregulated during regeneration - early |
| ENSDART00000133701 | slc6a1a             | 0.017494941 | -0.417718543 | -0.444992936  | -0.335539494 | -0.221449117 | downregulated during regeneration - early |
| ENSDART00000133735 | cacng7b             | 0.004879285 | -0.52911361  | -0.351880161  | -0.311790544 | -0.261905914 | downregulated during regeneration - early |
| ENSDART00000133743 | camkk1a             | 0.001676296 | -0.520213698 | -0.784879077  | -0.322164805 | -0.513359014 | downregulated during regeneration - early |
| ENSDART00000133802 | inpp5jb             | 0.006314264 | -0.26851081  | -0.522364408  | -0.244805361 | -0.012462884 | downregulated during regeneration - early |
| ENSDART00000134053 | usp2a               | 0.031101324 | -0.375529791 | -0.273036858  | -0.320691469 | -0.159380591 | downregulated during regeneration - early |
| ENSDART00000134186 | cpk4b               | 0.027048639 | -0.392479495 | -0.543085477  | -0.51593407  | -0.267696813 | downregulated during regeneration - early |
| ENSDART00000134431 | pcbp3               | 0.001578304 | -0.497499314 | -0.525712825  | -0.323624866 | -0.140513929 | downregulated during regeneration - early |
| ENSDART00000134489 | htr2cl1             | 0.010885977 | -0.503209957 | -0.409297224  | -0.43743207  | -0.200430987 | downregulated during regeneration - early |
| ENSDART00000134518 | cpa6                | 0.014368587 | -0.382405278 | -0.418058887  | -0.443147645 | -0.210306107 | downregulated during regeneration - early |
| ENSDART00000134661 | gstcd               | 0.067079    | -0.989748846 | -0.61234101   | -0.452964111 | -0.446444607 | downregulated during regeneration - early |
| ENSDART00000135206 | ppp6r2b             | 0.014582204 | -0.281142732 | -0.364406934  | -0.331381396 | -0.106942863 | downregulated during regeneration - early |
| ENSDART00000135481 | si:ch211-67n3.9     | 0.025747062 | -0.264301646 | -0.482759797  | -0.356089399 | -0.148916978 | downregulated during regeneration - early |
| ENSDART00000135897 | tmeff2a             | 0.000235661 | -0.507501095 | -0.570530323  | -0.389897465 | -0.071849112 | downregulated during regeneration - early |
| ENSDART00000135965 | plch1               | 0.00810207  | -0.574356968 | -0.567600235  | -0.421755163 | -0.154028312 | downregulated during regeneration - early |
| ENSDART00000136200 | cbn2b               | 0.007124918 | -0.48916567  | -0.352468034  | -0.442788192 | -0.14816736  | downregulated during regeneration - early |
| ENSDART00000136255 | otofa               | 0.000894529 | -0.67545742  | -0.815938232  | -0.602392654 | -0.103624276 | downregulated during regeneration - early |
| ENSDART00000136390 | hcn2b               | 0.012583499 | -0.288020893 | -0.351077892  | -0.312560003 | -0.049583355 | downregulated during regeneration - early |
| ENSDART00000136497 | CR318624.1          | 0.022425099 | -0.290569983 | -0.906819744  | -0.441990313 | 0.029701559  | downregulated during regeneration - early |
| ENSDART00000136559 | ano8a               | 0.000185329 | -0.477178876 | -0.572871399  | -0.340924619 | -0.093243478 | downregulated during regeneration - early |
| ENSDART00000136592 | ckbb                | 0.021710741 | -0.985379774 | -1.268435214  | -0.989267529 | -0.749991465 | downregulated during regeneration - early |
| ENSDART00000136654 | grapb               | 0.038386468 | -0.34841027  | -0.721289328  | -0.501261917 | -0.353877694 | downregulated during regeneration - early |
| ENSDART00000136726 | magi3b              | 0.006204545 | -0.381646177 | -0.461208385  | -0.226303301 | -0.080158554 | downregulated during regeneration - early |
| ENSDART00000136733 | glra1               | 0.010376336 | -0.259893278 | -0.432961012  | -0.409765299 | -0.248913141 | downregulated during regeneration - early |
| ENSDART00000136789 | tjp2a               | 0.004813371 | -0.247782376 | -0.5111487885 | -0.433268095 | -0.195886379 | downregulated during regeneration - early |
| ENSDART00000136805 | rbm10               | 0.044578922 | -4.539752918 | -3.15582054   | -1.19980751  | -2.046490722 | downregulated during regeneration - early |

|                    |                    |             |              |              |              |              |                                           |
|--------------------|--------------------|-------------|--------------|--------------|--------------|--------------|-------------------------------------------|
| ENSDART00000136853 | fam163b            | 0.012342358 | -0.426911899 | -0.715978676 | -0.456698496 | -0.087825906 | downregulated during regeneration - early |
| ENSDART00000137021 | cabp4              | 0.005059311 | -0.36160439  | -0.600623701 | -0.526609212 | -0.179412794 | downregulated during regeneration - early |
| ENSDART00000137038 | asic2              | 0.002292785 | -0.373156822 | -0.72567768  | -0.446804249 | -0.152680828 | downregulated during regeneration - early |
| ENSDART00000137214 | gpm6bb             | 0.003631812 | -0.410929898 | -0.351705205 | -0.352631557 | -0.244368267 | downregulated during regeneration - early |
| ENSDART00000137287 | pebp1              | 0.030268752 | -0.40574808  | -0.266170824 | -0.343257245 | -0.128567003 | downregulated during regeneration - early |
| ENSDART00000137293 | dia1b              | 0.011346243 | -0.377972932 | -0.365130624 | -0.231479469 | -0.228625621 | downregulated during regeneration - early |
| ENSDART00000137424 | c1qtnf4            | 0.013968714 | -0.387372103 | -0.312978581 | -0.242907328 | -0.243606392 | downregulated during regeneration - early |
| ENSDART00000137443 | ANK1 (1 of many)   | 0.009480138 | -0.657062014 | -0.810024547 | -0.456200062 | -0.254232075 | downregulated during regeneration - early |
| ENSDART00000137505 | vamp1              | 0.002192481 | -0.431791589 | -0.393372103 | -0.433651273 | -0.142134375 | downregulated during regeneration - early |
| ENSDART00000137648 | si:dkeyp-123h10.2  | 0.001203555 | -0.55097741  | -0.596976893 | -0.447594093 | -0.275058949 | downregulated during regeneration - early |
| ENSDART00000137680 | BX663503.1         | 0.042893923 | -0.232606929 | -0.407355209 | -0.255389687 | -0.079162056 | downregulated during regeneration - early |
| ENSDART00000137728 | st6gal1            | 0.00818074  | -0.677667407 | -0.699420985 | -0.736040173 | -0.083670402 | downregulated during regeneration - early |
| ENSDART00000137848 | palmda             | 0.050492107 | -0.364561265 | -0.248835039 | -0.231952958 | -0.127331926 | downregulated during regeneration - early |
| ENSDART00000138139 | zgc:153157         | 0.006145665 | -0.590921601 | -0.369202687 | -0.339560998 | -0.377004198 | downregulated during regeneration - early |
| ENSDART00000138140 | SLC4A5 (1 of many) | 0.02741598  | -0.322967614 | -0.430634585 | -0.36463151  | -0.15311364  | downregulated during regeneration - early |
| ENSDART00000138185 | gad1b              | 0.050170102 | -0.304744145 | -0.418178899 | -0.358818296 | -0.231950915 | downregulated during regeneration - early |
| ENSDART00000138477 | BX571945.1         | 0.007291871 | -0.597559877 | -0.845904193 | -0.62766334  | -0.501952231 | downregulated during regeneration - early |
| ENSDART00000138687 | ppp1r9a            | 0.010965837 | -0.410087357 | -0.337226328 | -0.257566135 | -0.006942521 | downregulated during regeneration - early |
| ENSDART00000138733 | cdh12a             | 0.010404332 | -0.402719414 | -0.467471363 | -0.247597318 | -0.111519505 | downregulated during regeneration - early |
| ENSDART00000138755 | dcl1a              | 0.013281778 | -0.464513032 | -0.326162873 | -0.241704881 | -0.01162875  | downregulated during regeneration - early |
| ENSDART00000138820 | lrtn2a             | 0.053649719 | -0.205456302 | -0.473378158 | -0.285055681 | -0.252340958 | downregulated during regeneration - early |
| ENSDART00000138822 | SSBP4 (1 of many)  | 0.003854547 | -0.268549166 | -0.417362634 | -0.271649078 | -0.060566364 | downregulated during regeneration - early |
| ENSDART00000138890 | kcmd2              | 0.006198931 | -0.399063976 | -0.347742148 | -0.33423415  | -0.044907554 | downregulated during regeneration - early |
| ENSDART00000139033 | lrp1bb             | 0.016464653 | -0.300129828 | -0.380241873 | -0.239929923 | -0.108887683 | downregulated during regeneration - early |
| ENSDART00000139191 | trpc1              | 0.008989451 | -0.495478264 | -0.440776277 | -0.289497882 | -0.094213915 | downregulated during regeneration - early |
| ENSDART00000139196 | kif1ab             | 0.024103105 | -0.338072705 | -0.653527626 | -0.314444638 | -0.193117382 | downregulated during regeneration - early |
| ENSDART00000139560 | ppp3r1a            | 0.023218149 | -0.205912354 | -0.312380575 | -0.194151002 | 0.010760735  | downregulated during regeneration - early |
| ENSDART00000139568 | nsmfa              | 0.033226863 | -0.224590353 | -0.433156538 | -0.157442583 | -0.141070436 | downregulated during regeneration - early |
| ENSDART00000139569 | zgc:92658          | 5.24617E-05 | -0.993075003 | -0.842810673 | -0.747118722 | -0.361693255 | downregulated during regeneration - early |
| ENSDART00000139608 | upf3a              | 0.003570588 | -0.436308546 | -0.475063889 | -0.33694709  | -0.215591369 | downregulated during regeneration - early |
| ENSDART00000139633 | pip4k2ab           | 0.018433591 | -0.336773688 | -0.358059228 | -0.306910553 | -0.048531465 | downregulated during regeneration - early |
| ENSDART00000139937 | frmpd1a            | 0.008579097 | -0.391315372 | -0.461157908 | -0.442405648 | -0.041073617 | downregulated during regeneration - early |
| ENSDART00000140028 | lrrc4.1            | 0.00194329  | -0.491138395 | -0.428849217 | -0.374271959 | -0.216352385 | downregulated during regeneration - early |
| ENSDART00000140220 | si:ch211-168k14.2  | 0.057257329 | -0.180662482 | -0.408562234 | -0.217555172 | -0.18329178  | downregulated during regeneration - early |
| ENSDART00000140632 | bcl2l13            | 0.001079711 | -0.49849375  | -0.354616708 | -0.335413941 | -0.223271321 | downregulated during regeneration - early |
| ENSDART00000140650 | ankrd6b            | 0.004329931 | -0.31619699  | -0.471630097 | -0.512160686 | -0.029088129 | downregulated during regeneration - early |
| ENSDART00000140995 | mfsd2b             | 0.018126285 | -0.430905256 | -0.255202968 | -0.49728314  | -0.134050367 | downregulated during regeneration - early |
| ENSDART00000141177 | slc24a4a           | 8.45072E-05 | -0.524899894 | -0.691002096 | -0.394086808 | -0.038902918 | downregulated during regeneration - early |
| ENSDART00000141634 | grid2              | 0.003104562 | -0.260805209 | -0.581973695 | -0.28493372  | -0.055775802 | downregulated during regeneration - early |
| ENSDART00000142010 | ncam1b             | 0.027293911 | -0.299560612 | -0.317330716 | -0.349579067 | -0.156694047 | downregulated during regeneration - early |
| ENSDART00000142013 | penka              | 0.001690789 | -0.474299096 | -0.531588241 | -0.656476493 | -0.472875583 | downregulated during regeneration - early |
| ENSDART00000142129 | tacr2              | 0.0004696   | -0.694450519 | -0.993924228 | -0.826737427 | -0.21380073  | downregulated during regeneration - early |
| ENSDART00000142171 | syt6a              | 0.011695536 | -0.424476082 | -0.649670345 | -0.435293945 | -0.206511692 | downregulated during regeneration - early |
| ENSDART00000142223 | hivep3b            | 0.013948629 | -0.312228644 | -0.441058379 | -0.334712198 | -0.18438466  | downregulated during regeneration - early |
| ENSDART00000142397 | samd12             | 0.034654408 | -0.674160268 | -0.821942052 | -0.657095298 | -0.360701575 | downregulated during regeneration - early |
| ENSDART00000142413 | BX897741.1         | 0.02739836  | -0.396693848 | -0.590528792 | -0.411359985 | -0.422415067 | downregulated during regeneration - early |
| ENSDART00000142654 | BX324123.2         | 0.001948843 | -0.377689742 | -0.458973085 | -0.444383379 | -0.275709525 | downregulated during regeneration - early |
| ENSDART00000142748 | UNC13A             | 0.007676315 | -0.222825276 | -0.520698317 | -0.335972829 | 0.134560543  | downregulated during regeneration - early |
| ENSDART00000142806 | stxbp5a            | 0.013774152 | -0.250986358 | -0.382479123 | -0.333968332 | -0.143471828 | downregulated during regeneration - early |
| ENSDART00000142810 | gabra3             | 0.005380857 | -0.405359169 | -0.863749916 | -0.692169745 | -0.647424845 | downregulated during regeneration - early |
| ENSDART00000142837 | enpp5              | 0.001384619 | -0.408425134 | -0.376571863 | -0.363824939 | -0.214479077 | downregulated during regeneration - early |
| ENSDART00000142975 | si:ch1073-70f20.1  | 0.018752626 | -0.443514404 | -0.337920446 | -0.430300513 | -0.297428401 | downregulated during regeneration - early |
| ENSDART00000142976 | knip3a             | 0.00059038  | -0.515340349 | -0.554488278 | -0.50826115  | -0.165828333 | downregulated during regeneration - early |
| ENSDART00000143382 | il1rapl2           | 0.002636211 | -0.355933029 | -0.71045348  | -0.38678508  | -0.068375826 | downregulated during regeneration - early |
| ENSDART00000143554 | ampd2b             | 0.018018574 | -0.328956412 | -0.382404642 | -0.421715131 | -0.209511328 | downregulated during regeneration - early |
| ENSDART00000143582 | si:ch211-236p22.1  | 0.000480969 | -0.593497691 | -1.183006832 | -0.39659144  | -0.180756629 | downregulated during regeneration - early |
| ENSDART00000143703 | flrt3              | 0.013070438 | -0.315208699 | -0.338016477 | -0.216002726 | -0.160149445 | downregulated during regeneration - early |
| ENSDART00000143784 | doc2d              | 0.00429824  | -0.282456786 | -0.449882775 | -0.341326778 | 0.036564808  | downregulated during regeneration - early |
| ENSDART00000143787 | tnr                | 0.054368123 | -0.299938525 | -0.646994379 | -0.19048806  | -0.113023917 | downregulated during regeneration - early |
| ENSDART00000143867 | syngap1b           | 0.009560651 | -0.339959547 | -0.514759454 | -0.488418852 | -0.182310837 | downregulated during regeneration - early |
| ENSDART00000143878 | arhgef9a           | 0.001216477 | -0.465269949 | -0.707003765 | -0.492066921 | -0.306386806 | downregulated during regeneration - early |
| ENSDART00000143911 | si:dkey-105e17.1   | 0.001995188 | -0.529795865 | -0.492017338 | -0.300236892 | -0.145540976 | downregulated during regeneration - early |
| ENSDART00000143919 | gabbr1b            | 0.013735417 | -0.121288245 | -0.415278076 | -0.279488234 | -0.175446101 | downregulated during regeneration - early |
| ENSDART00000144175 | ccdc136b           | 0.006621714 | -0.408583735 | -0.440451575 | -0.345784282 | -0.125541648 | downregulated during regeneration - early |
| ENSDART00000144255 | magixb             | 0.023143967 | -0.339150091 | -0.441125122 | -0.366876369 | -0.172380242 | downregulated during regeneration - early |
| ENSDART00000144297 | ubac2              | 0.017079861 | -0.266999312 | -0.798888734 | -0.707434326 | -0.564642121 | downregulated during regeneration - early |
| ENSDART00000144600 | bin1a              | 0.005414718 | -0.647409952 | -0.602565457 | -0.5226216   | -0.498459302 | downregulated during regeneration - early |
| ENSDART00000144995 | MFS3               | 0.030278232 | -0.419691404 | -0.388696945 | -0.281399212 | -0.247251894 | downregulated during regeneration - early |
| ENSDART00000145220 | arvcfa             | 0.000248952 | -0.706915106 | -0.825791875 | -0.448746575 | -0.046016635 | downregulated during regeneration - early |
| ENSDART00000145226 | si:ch211-233h19.2  | 0.050170102 | -0.372287835 | -0.175787817 | -0.260726103 | -0.131614613 | downregulated during regeneration - early |
| ENSDART00000145342 | cbn1               | 0.014767146 | -0.285689309 | -0.291683977 | -0.350650667 | -0.126158592 | downregulated during regeneration - early |
| ENSDART00000145364 | sybu               | 0.039389579 | -0.525383816 | -0.345930455 | -0.451355227 | -0.158271762 | downregulated during regeneration - early |
| ENSDART00000145387 | shank2             | 0.001007682 | -0.271198688 | -0.514736215 | -0.289482704 | -0.011228429 | downregulated during regeneration - early |
| ENSDART00000145413 | si:ch211-253p2.2   | 0.01662249  | -0.612329709 | -0.583952587 | -0.545467055 | -0.273784221 | downregulated during regeneration - early |
| ENSDART00000145615 | cacna1i            | 0.003514334 | -0.38207214  | -0.804209146 | -0.404812647 | -0.085276411 | downregulated during regeneration - early |



|                    |                    |             |              |              |              |              |                                           |
|--------------------|--------------------|-------------|--------------|--------------|--------------|--------------|-------------------------------------------|
| ENSDART00000145916 | lingo4a            | 0.003535619 | -0.858684072 | -0.829176543 | -0.734684966 | -0.796722528 | downregulated during regeneration - early |
| ENSDART00000145979 | col19a1            | 0.019480943 | -0.158274269 | -0.337487778 | -0.291137211 | -0.179712512 | downregulated during regeneration - early |
| ENSDART00000146113 | arhgef9b           | 0.000103226 | -0.6095368   | -0.587211831 | -0.441711189 | -0.048741645 | downregulated during regeneration - early |
| ENSDART00000146227 | slc24a3            | 0.000387884 | -0.627503774 | -0.581196675 | -0.447342274 | -0.279205796 | downregulated during regeneration - early |
| ENSDART00000146284 | kcnh3              | 0.00027551  | -0.880077839 | -1.089282019 | -0.771605014 | -0.433474862 | downregulated during regeneration - early |
| ENSDART00000146321 | fibcd1             | 0.012665885 | -0.340172452 | -0.594838596 | -0.369380512 | -0.071609744 | downregulated during regeneration - early |
| ENSDART00000146327 | sgk1               | 0.004289396 | -0.407553517 | -0.497547741 | -0.442772363 | -0.391494952 | downregulated during regeneration - early |
| ENSDART00000146380 | map6d1             | 0.003805801 | -0.622612519 | -0.482084178 | -0.312516702 | -0.212427733 | downregulated during regeneration - early |
| ENSDART00000146422 | samd12             | 0.010712161 | -0.651610173 | -1.082672704 | -0.694390946 | -0.535477884 | downregulated during regeneration - early |
| ENSDART00000146424 | bin1a              | 0.007279599 | -0.478145779 | -0.444599263 | -0.2729609   | -0.137965745 | downregulated during regeneration - early |
| ENSDART00000146712 | ccdc85a            | 0.014638227 | -0.396306457 | -0.805958759 | -0.536293039 | -0.356615708 | downregulated during regeneration - early |
| ENSDART00000147308 | amigo1             | 0.02740918  | -0.366406631 | -0.580638611 | -0.462226604 | -0.20619589  | downregulated during regeneration - early |
| ENSDART00000147473 | pchl1              | 0.010143774 | -0.408472737 | -0.345735504 | -0.351470668 | -0.372482226 | downregulated during regeneration - early |
| ENSDART00000147658 | bhlhe22            | 0.01205445  | -0.302235414 | -0.31899187  | -0.305987775 | -0.102192149 | downregulated during regeneration - early |
| ENSDART00000147868 | vwc2               | 0.003299709 | -0.776498099 | -0.767193994 | -0.55435848  | -0.286994867 | downregulated during regeneration - early |
| ENSDART00000148073 | shisa7b            | 0.034090908 | -0.122233425 | -0.392255987 | -0.298336106 | -0.168085028 | downregulated during regeneration - early |
| ENSDART00000148564 | si:ch211-236p22.1  | 0.00081324  | -0.699364761 | -0.998683731 | -0.566423622 | -0.06995253  | downregulated during regeneration - early |
| ENSDART00000148576 | pygmb              | 0.002081425 | -0.380093922 | -0.425025096 | -0.447938233 | -0.092571282 | downregulated during regeneration - early |
| ENSDART00000148930 | lingo4b            | 0.038693778 | -0.229730557 | -0.308881186 | -0.199125951 | -0.339156928 | downregulated during regeneration - early |
| ENSDART00000148971 | ctbp2a             | 0.015781384 | -0.618298464 | -0.594645977 | -0.414478241 | -0.261581238 | downregulated during regeneration - early |
| ENSDART00000149079 | sagb               | 0.045816167 | -0.618298464 | -0.230897218 | -0.419750319 | -0.182809331 | downregulated during regeneration - early |
| ENSDART00000149297 | slc20a2            | 0.01613952  | -0.247675699 | -0.319353289 | -0.309560982 | -0.222732695 | downregulated during regeneration - early |
| ENSDART00000149411 | atxn1b             | 0.052229213 | -0.356760798 | -0.298446699 | -0.334747495 | -0.251003673 | downregulated during regeneration - early |
| ENSDART00000149608 | nexn               | 0.041923827 | -0.437154987 | -0.289194529 | -0.346094746 | -0.307861675 | downregulated during regeneration - early |
| ENSDART00000149914 | aatka              | 0.000313682 | -0.270082025 | -0.541170375 | -0.440872523 | -0.175726567 | downregulated during regeneration - early |
| ENSDART00000149993 | pygmb              | 0.000820449 | -0.443639651 | -0.459929444 | -0.472379886 | -0.083989126 | downregulated during regeneration - early |
| ENSDART00000150228 | chata              | 0.006385907 | -0.431975216 | -0.532525907 | -0.558690348 | -0.371717362 | downregulated during regeneration - early |
| ENSDART00000150353 | mdh1aa             | 0.015618075 | -0.527537579 | -0.6816935   | -0.262947    | -0.041325795 | downregulated during regeneration - early |
| ENSDART00000151127 | thraa              | 0.039890399 | -0.798583389 | -0.802364861 | -0.351487338 | -0.589241182 | downregulated during regeneration - early |
| ENSDART00000151200 | mmp17a             | 0.001404149 | -0.370431866 | -1.068890772 | -0.706081815 | -0.179291377 | downregulated during regeneration - early |
| ENSDART00000151229 | kcnj5              | 0.032556649 | -0.403592435 | -0.680204447 | -0.664541848 | -0.399506515 | downregulated during regeneration - early |
| ENSDART00000151358 | rgl3a              | 0.000209364 | -0.536133566 | -0.674550597 | -0.735844208 | -0.535493428 | downregulated during regeneration - early |
| ENSDART00000151373 | c1ql3b             | 0.004627449 | -0.428342943 | -0.592751887 | -0.458841393 | -0.097254864 | downregulated during regeneration - early |
| ENSDART00000151567 | sgk494b            | 0.013519377 | -0.371209064 | -0.282108451 | -0.446431854 | -0.117181288 | downregulated during regeneration - early |
| ENSDART00000151627 | si:ch73-362m14.2   | 0.002433479 | -1.029772234 | -1.504293907 | -1.467613461 | -0.562650292 | downregulated during regeneration - early |
| ENSDART00000152069 | chst2b             | 0.01938191  | -0.329630849 | -0.401663244 | -0.360860216 | -0.363893389 | downregulated during regeneration - early |
| ENSDART00000152371 | usp2a              | 0.034504752 | -0.286860533 | -0.506577502 | -0.337595735 | 0.001938619  | downregulated during regeneration - early |
| ENSDART00000152376 | CLSTN2 (1 of many) | 0.008176596 | -0.314646809 | -0.323760148 | -0.422303692 | -0.021838531 | downregulated during regeneration - early |
| ENSDART00000152409 | mpp3b              | 0.050836368 | -0.399859226 | -0.270912664 | -0.49906829  | -0.114613724 | downregulated during regeneration - early |
| ENSDART00000152531 | chra10a            | 0.027468632 | -0.39848157  | -0.348304481 | -0.425468269 | -0.274269467 | downregulated during regeneration - early |
| ENSDART00000152556 | FAM13C             | 0.014686352 | -0.458278075 | -0.375744323 | -0.341944162 | -0.232139437 | downregulated during regeneration - early |
| ENSDART00000152580 | nlgna4             | 0.013502603 | -0.383612645 | -0.391621152 | -0.368243921 | -0.24740854  | downregulated during regeneration - early |
| ENSDART00000152858 | rcan2              | 0.017079861 | -0.344037465 | -0.451039286 | -0.208970338 | -0.321499331 | downregulated during regeneration - early |
| ENSDART00000153167 | hlfb               | 0.010966965 | -0.470839666 | -0.326611575 | -0.235752692 | -0.264047019 | downregulated during regeneration - early |
| ENSDART00000153187 | thrab              | 0.001402519 | -0.362356661 | -0.551240408 | -0.403932333 | -0.192068079 | downregulated during regeneration - early |
| ENSDART00000153247 | si:ch211-120g10.1  | 0.002147221 | -0.520249419 | -0.414424265 | -0.454570577 | -0.107523144 | downregulated during regeneration - early |
| ENSDART00000153256 | cacna1g            | 0.001006824 | -0.53708851  | -0.717133052 | -0.415346006 | -0.243050395 | downregulated during regeneration - early |
| ENSDART00000153391 | otofa              | 0.002551958 | -0.790883428 | -1.357026899 | -0.581227909 | -0.190433713 | downregulated during regeneration - early |
| ENSDART00000153591 | si:dkey-56f14.7    | 0.023379519 | -0.35474859  | -0.1685547   | -0.219665386 | -0.050831688 | downregulated during regeneration - early |
| ENSDART00000153673 | kcnb1              | 0.00060684  | -0.632196562 | -0.836186932 | -0.481100002 | -0.109364665 | downregulated during regeneration - early |
| ENSDART00000153925 | fut9a              | 0.002016009 | -0.379466906 | -0.312742341 | -0.333889875 | -0.027131911 | downregulated during regeneration - early |
| ENSDART00000153937 | prkd1              | 0.021615739 | -0.314650217 | -0.382419593 | -0.495097396 | -0.310742086 | downregulated during regeneration - early |
| ENSDART00000154132 | nptx2a             | 0.03060143  | -0.534082272 | -0.549346998 | -0.399917367 | -0.21269489  | downregulated during regeneration - early |
| ENSDART00000154148 | camk1a             | 9.45963E-05 | -0.513931344 | -0.665527159 | -0.499415187 | -0.020106333 | downregulated during regeneration - early |
| ENSDART00000154187 | fat3a              | 0.00879177  | -0.16861177  | -0.487078475 | -0.285722941 | -0.100061338 | downregulated during regeneration - early |
| ENSDART00000154228 | sgip1a             | 0.019808116 | -0.210460002 | -0.370824353 | -0.364544583 | -0.177769156 | downregulated during regeneration - early |
| ENSDART00000154238 | AL928908.3         | 0.098059417 | -0.284715118 | -0.465774511 | -0.246230328 | -0.209644064 | downregulated during regeneration - early |
| ENSDART00000154437 | dyrk1ab            | 0.025500103 | -0.405599591 | -0.293606249 | -0.153631672 | -0.200586701 | downregulated during regeneration - early |
| ENSDART00000154539 | slc17a7b           | 0.013310088 | -0.194590302 | -0.417792811 | -0.270877884 | 0.095165091  | downregulated during regeneration - early |
| ENSDART00000154679 | ypel2b             | 0.000167073 | -0.575722509 | -0.671947843 | -0.397167717 | -0.03983803  | downregulated during regeneration - early |
| ENSDART00000154682 | CR871762.1         | 0.002649033 | -0.541034447 | -0.676553431 | -0.554824044 | -0.149530967 | downregulated during regeneration - early |
| ENSDART00000154732 | ptprt              | 0.007520653 | -0.128635692 | -0.441586772 | -0.224155866 | -0.045463061 | downregulated during regeneration - early |
| ENSDART00000154760 | CU302436.3         | 0.000164423 | -0.931829111 | -0.859047685 | -0.631190961 | -0.184130931 | downregulated during regeneration - early |
| ENSDART00000154778 | map1ab             | 0.016443396 | -0.607759134 | -0.711103734 | -0.339973576 | -0.303457691 | downregulated during regeneration - early |
| ENSDART00000154783 | BX511311.5         | 0.001907584 | -0.420893047 | -0.406058694 | -0.342057398 | -0.24848029  | downregulated during regeneration - early |
| ENSDART00000154916 | p4htm              | 0.025523567 | -0.322717782 | -0.242652877 | -0.246255125 | -0.141036056 | downregulated during regeneration - early |
| ENSDART00000155108 | si:ch211-15316.6   | 0.024999915 | -0.396073461 | -0.324628235 | -0.330118035 | -0.333690214 | downregulated during regeneration - early |
| ENSDART00000155229 | rxfp3.3b           | 0.002524433 | -0.899836922 | -0.961252446 | -0.631060044 | -0.38629797  | downregulated during regeneration - early |
| ENSDART00000155243 | BX571762.2         | 0.000109677 | -0.58394173  | -0.66558831  | -0.494788274 | -0.139509269 | downregulated during regeneration - early |
| ENSDART00000155346 | tbcd124            | 0.000529346 | -0.444989153 | -0.328605075 | -0.340554332 | -0.035933185 | downregulated during regeneration - early |
| ENSDART00000155480 | ptprnb             | 0.001147964 | -0.501074747 | -0.734898939 | -0.55867421  | -0.198202123 | downregulated during regeneration - early |
| ENSDART00000155496 | gal3st2            | 0.005444477 | -0.347287801 | -0.358994611 | -0.502209455 | 0.011977936  | downregulated during regeneration - early |
| ENSDART00000155539 | CR786577.1         | 0.00335169  | -0.296712547 | -0.710798753 | -0.341045728 | 0.032686751  | downregulated during regeneration - early |
| ENSDART00000155786 | adgr1a             | 0.019467351 | -0.190147203 | -0.479741899 | -0.292479007 | 0.056973675  | downregulated during regeneration - early |
| ENSDART00000155821 | kcnt2              | 0.00366084  | -1.064051569 | -1.353278896 | -1.209879321 | -0.444718597 | downregulated during regeneration - early |



|                    |                    |             |               |               |              |              |                                           |
|--------------------|--------------------|-------------|---------------|---------------|--------------|--------------|-------------------------------------------|
| ENSDART00000155853 | gprc5ba            | 0.000668535 | -0.568480744  | -0.680176078  | -0.476445621 | -0.089942946 | downregulated during regeneration - early |
| ENSDART00000155865 | tmtops2a           | 0.015325737 | -0.317973372  | -0.37404155   | -0.204729003 | -0.178609254 | downregulated during regeneration - early |
| ENSDART00000156019 | phlpp1             | 0.010699261 | -0.378155747  | -0.257656641  | -0.150573304 | -0.126584813 | downregulated during regeneration - early |
| ENSDART00000156280 | si:ch211-195b15.7  | 0.04283071  | -0.343611395  | -0.333351498  | -0.20091334  | -0.160599804 | downregulated during regeneration - early |
| ENSDART00000156340 | si:ch211-167b20.8  | 0.018211877 | -0.291865267  | -0.289158159  | -0.304691219 | -0.11151074  | downregulated during regeneration - early |
| ENSDART00000156351 | zfat               | 0.027293911 | -0.386268069  | -0.362611932  | -0.387180541 | -0.301395116 | downregulated during regeneration - early |
| ENSDART00000156418 | itpk1b             | 0.001814914 | -0.567310725  | -0.6808899    | -0.20043499  | -0.215676742 | downregulated during regeneration - early |
| ENSDART00000156447 | ap2a1              | 0.048872862 | -0.168026562  | -0.400633541  | -0.149036642 | -0.01932092  | downregulated during regeneration - early |
| ENSDART00000156473 | CR627483.1         | 0.003693464 | -0.446874417  | -0.944979531  | -0.551426346 | -0.288797786 | downregulated during regeneration - early |
| ENSDART00000156574 | si:ch211-270g19.5  | 0.033836445 | -0.160521866  | -0.305818991  | -0.352315858 | -0.223463705 | downregulated during regeneration - early |
| ENSDART00000156615 | amigo3             | 0.011421096 | -0.174881747  | -0.348495554  | -0.328942663 | 0.002458748  | downregulated during regeneration - early |
| ENSDART00000156741 | BX663503.2         | 0.000389264 | -0.41351136   | -0.472789266  | -0.358517546 | -0.050787842 | downregulated during regeneration - early |
| ENSDART00000156760 | grik4              | 0.048815993 | -0.347451056  | -0.6347809172 | -0.373537369 | -0.211041818 | downregulated during regeneration - early |
| ENSDART00000156864 | CR376745.2         | 0.003637926 | -0.465037351  | -0.777375633  | -0.748299595 | -0.606506499 | downregulated during regeneration - early |
| ENSDART00000156877 | prss56             | 0.031769506 | -1.154037343  | -0.806544973  | -0.688753663 | -0.465249106 | downregulated during regeneration - early |
| ENSDART00000156923 | plekhd1            | 0.012263789 | -0.640317774  | -0.396125765  | -0.428766409 | -0.43244988  | downregulated during regeneration - early |
| ENSDART00000156928 | nrxn3a             | 0.007397439 | 0.020925857   | -0.341808434  | -0.239366202 | 0.052782357  | downregulated during regeneration - early |
| ENSDART00000157043 | rtn4r              | 0.022328328 | -0.358605066  | -0.3593825    | -0.41712234  | -0.136427457 | downregulated during regeneration - early |
| ENSDART00000157124 | CT033825.1         | 0.001443362 | -0.560424235  | -0.809708864  | -0.680777647 | -0.144372819 | downregulated during regeneration - early |
| ENSDART00000157129 | slc12a5a           | 0.000109677 | -0.482400538  | -0.74419089   | -0.401518291 | -0.07447909  | downregulated during regeneration - early |
| ENSDART00000157195 | ncam2              | 0.001019802 | -0.570912178  | -0.719154845  | -0.407642777 | 0.002619526  | downregulated during regeneration - early |
| ENSDART00000157330 | necab3             | 0.001497317 | -0.311593638  | -0.396628677  | -0.274835563 | -0.023399638 | downregulated during regeneration - early |
| ENSDART00000157414 | plxna4             | 0.033833708 | -0.256858488  | -0.391015088  | -0.285048615 | -0.106219383 | downregulated during regeneration - early |
| ENSDART00000157535 | unc13c             | 0.004469286 | -0.230182256  | -0.566319347  | -0.291866696 | -0.102048139 | downregulated during regeneration - early |
| ENSDART00000157659 | camta1b            | 0.01608096  | -0.074265168  | -0.690891494  | -0.316064045 | -0.339000781 | downregulated during regeneration - early |
| ENSDART00000157852 | crtac1b            | 0.042224659 | -0.401370563  | -0.59197436   | -0.358347223 | -0.176621049 | downregulated during regeneration - early |
| ENSDART00000157943 | TENM2              | 0.003686025 | -0.301363214  | -0.846881931  | -0.344978545 | 0.012452     | downregulated during regeneration - early |
| ENSDART00000158169 | cacna2d2a          | 0.001267982 | -0.273970943  | -0.601526504  | -0.288906256 | -0.138856816 | downregulated during regeneration - early |
| ENSDART00000158204 | ntrk3a             | 0.003654787 | -0.6324530073 | -0.669954401  | -0.450935682 | -0.114414424 | downregulated during regeneration - early |
| ENSDART00000158259 | lrrtm1             | 0.053954169 | -0.264679565  | -0.523836662  | -0.478235847 | -0.361630227 | downregulated during regeneration - early |
| ENSDART00000158294 | ppp2r2cb           | 0.007536007 | -0.427479199  | -0.698226267  | -0.466339082 | -0.260646218 | downregulated during regeneration - early |
| ENSDART00000158358 | stk40              | 0.042731689 | -0.305579471  | -0.394234001  | -0.179882029 | -0.355392322 | downregulated during regeneration - early |
| ENSDART00000158515 | NA                 | 0.009800471 | -0.601694587  | -0.246037227  | -0.439227399 | -0.290329932 | downregulated during regeneration - early |
| ENSDART00000158540 | PRKCA (1 of many)  | 0.021044962 | -0.338994629  | -0.305121271  | -0.237610526 | -0.160203254 | downregulated during regeneration - early |
| ENSDART00000158820 | golga7bb           | 0.029287312 | -0.4411549718 | -0.650879189  | -0.491036037 | -0.164497612 | downregulated during regeneration - early |
| ENSDART00000158919 | lpar1              | 0.053989613 | -0.789836287  | -0.638879508  | -0.710773837 | -0.465534721 | downregulated during regeneration - early |
| ENSDART00000159087 | drd2b              | 0.000503033 | -0.654775306  | -0.766659414  | -0.766987138 | -0.309487495 | downregulated during regeneration - early |
| ENSDART00000159163 | c2cd2l             | 0.008021107 | -0.400916824  | -0.28913261   | -0.285175907 | -0.160469096 | downregulated during regeneration - early |
| ENSDART00000159165 | b3galt2            | 0.001631005 | -0.421223634  | -0.395995108  | -0.436113716 | -0.390524412 | downregulated during regeneration - early |
| ENSDART00000159368 | myo19              | 0.038545701 | -0.061571264  | -0.562765185  | -0.263758975 | -0.061266965 | downregulated during regeneration - early |
| ENSDART00000159493 | baiap2a            | 0.031365399 | -0.408759075  | -0.584635172  | -0.205977447 | -0.074404323 | downregulated during regeneration - early |
| ENSDART00000159523 | BX248501.1         | 0.045817107 | -0.802081931  | -1.281225474  | -1.178391388 | -0.841643515 | downregulated during regeneration - early |
| ENSDART00000159604 | mbd3b              | 0.065285449 | -0.404570692  | -0.312781624  | -0.318828454 | -0.248466452 | downregulated during regeneration - early |
| ENSDART00000159608 | fstl5              | 0.043959869 | -0.296329015  | -0.522282128  | -0.291629941 | -0.144161607 | downregulated during regeneration - early |
| ENSDART00000159745 | PCP4L1 (1 of many) | 7.10385E-05 | -0.632453626  | -0.700162017  | -0.354659005 | -0.133179733 | downregulated during regeneration - early |
| ENSDART00000159769 | pam                | 0.003805801 | -0.468861179  | -0.403502349  | -0.282541701 | -0.241769832 | downregulated during regeneration - early |
| ENSDART00000159916 | tns1a              | 0.00347249  | -0.270694335  | -0.694531751  | -0.372872148 | -0.014128978 | downregulated during regeneration - early |
| ENSDART00000160236 | fras1              | 0.023812224 | -0.444181856  | -0.638830818  | -0.533612869 | -0.242512624 | downregulated during regeneration - early |
| ENSDART00000160328 | zgc:109949         | 0.017825781 | -0.265252375  | -0.659300296  | -0.471802707 | -0.430381288 | downregulated during regeneration - early |
| ENSDART00000160337 | si:ch73-299h12.8   | 0.056707482 | -0.912707831  | -0.414120081  | -0.53567861  | -0.405510308 | downregulated during regeneration - early |
| ENSDART00000160542 | cabp2a             | 0.013233841 | -0.310654407  | -0.386778791  | -0.172317372 | -0.340396034 | downregulated during regeneration - early |
| ENSDART00000160555 | sema6e             | 0.029524772 | -0.284106568  | -0.324928323  | -0.250029521 | -0.168860793 | downregulated during regeneration - early |
| ENSDART00000160652 | iqsec3a            | 0.002605308 | -0.564945044  | -0.609250827  | -0.334399494 | -0.124185292 | downregulated during regeneration - early |
| ENSDART00000160927 | cers1              | 0.004232418 | -0.519571193  | -0.339170129  | -0.296459142 | -0.066758323 | downregulated during regeneration - early |
| ENSDART00000161121 | oxct1a             | 0.011687043 | -0.18384202   | -0.521566935  | -0.230939432 | -0.260776637 | downregulated during regeneration - early |
| ENSDART00000161156 | kcnj9              | 0.000230274 | -0.647175508  | -0.597438502  | -0.398278727 | -0.23455974  | downregulated during regeneration - early |
| ENSDART00000161250 | grin1b             | 0.009000055 | -0.242810387  | -0.349786254  | -0.246157691 | 0.067747546  | downregulated during regeneration - early |
| ENSDART00000161272 | dclk1a             | 0.011155635 | -0.780154894  | -0.444639927  | -0.375433616 | -0.486681237 | downregulated during regeneration - early |
| ENSDART00000161297 | lrrn3b             | 0.008563    | -0.369968613  | -0.470809526  | -0.36045804  | -0.046069156 | downregulated during regeneration - early |
| ENSDART00000161414 | meis2a             | 0.012130485 | -0.352024462  | -0.259692709  | -0.258698057 | -0.07620107  | downregulated during regeneration - early |
| ENSDART00000161533 | gfra1b             | 0.017199091 | -0.396684985  | -0.507239408  | -0.32341327  | -0.285757426 | downregulated during regeneration - early |
| ENSDART00000161698 | spock1             | 0.008495106 | -0.400537237  | -0.522818259  | -0.36383883  | -0.3494177   | downregulated during regeneration - early |
| ENSDART00000161708 | si:ch73-291f19.1   | 0.048892164 | -0.183985257  | -0.352166832  | -0.310452263 | -0.095145467 | downregulated during regeneration - early |
| ENSDART00000161735 | flrt1a             | 0.026767073 | -0.150942569  | -0.355176624  | -0.261636355 | -0.097731299 | downregulated during regeneration - early |
| ENSDART00000161798 | si:ch211-188f17.1  | 0.022416821 | -0.190236489  | -0.379885925  | -0.177844783 | -0.0015826   | downregulated during regeneration - early |
| ENSDART00000161828 | si:rp71-1h20.9     | 0.000291847 | -1.646379844  | -1.190834107  | -1.032421214 | -1.471047696 | downregulated during regeneration - early |
| ENSDART00000161938 | si:dkeyp-9d4.3     | 0.040982425 | -0.230392301  | -0.461066854  | -0.432261332 | -0.276495229 | downregulated during regeneration - early |
| ENSDART00000162063 | ppifb              | 0.003061973 | -0.192515925  | -0.861096392  | -0.286677305 | -0.512048401 | downregulated during regeneration - early |
| ENSDART00000162222 | SHC3               | 0.03131236  | -0.255397657  | -0.359792108  | -0.178043549 | -0.323533675 | downregulated during regeneration - early |
| ENSDART00000162228 | grip2a             | 0.010667361 | -0.209580983  | -0.468643062  | -0.36247099  | -0.147880595 | downregulated during regeneration - early |
| ENSDART00000162331 | si:dkey-22o22.2    | 0.015731546 | -0.434953721  | -0.633123757  | -0.287732073 | -0.108064019 | downregulated during regeneration - early |
| ENSDART00000162387 | zbtb38             | 0.015925333 | -0.362042869  | -0.285747988  | -0.199364681 | -0.27814593  | downregulated during regeneration - early |
| ENSDART00000162403 | napgb              | 0.030278232 | -0.42647327   | -0.557407706  | -0.383093342 | -0.343712014 | downregulated during regeneration - early |
| ENSDART00000162595 | camk2g1            | 0.032809386 | -0.045798893  | -0.36296086   | -0.180481912 | 0.032536235  | downregulated during regeneration - early |
| ENSDART00000162683 | trappc9            | 0.067505731 | -0.370182614  | -0.24071592   | -0.273499446 | -0.133452933 | downregulated during regeneration - early |

|                    |                      |             |              |              |              |              |                                           |
|--------------------|----------------------|-------------|--------------|--------------|--------------|--------------|-------------------------------------------|
| ENSDART00000162711 | cnksr2b              | 0.026706504 | -0.20949159  | -0.28214605  | -0.418907028 | -0.082150791 | downregulated during regeneration - early |
| ENSDART00000162732 | NA                   | 0.000536544 | -0.497798966 | -0.517625334 | -0.441909965 | -0.132483146 | downregulated during regeneration - early |
| ENSDART00000162804 | KCNT1 (1 of many)    | 0.004678129 | -0.406408577 | -0.48233323  | -0.378259831 | 0.110845983  | downregulated during regeneration - early |
| ENSDART00000162857 | nr4a3                | 0.003361003 | -1.482016444 | -1.152680943 | -0.606031454 | -1.193862677 | downregulated during regeneration - early |
| ENSDART00000162886 | il1rapl1b            | 0.006723268 | -0.53531005  | -0.60836138  | -0.536159373 | -0.086785386 | downregulated during regeneration - early |
| ENSDART00000162916 | si:ch211-177d9.1     | 0.017970224 | -0.561077771 | -0.777629972 | -0.458457407 | -0.043076344 | downregulated during regeneration - early |
| ENSDART00000163106 | cntnap5l             | 0.001234581 | -0.230959418 | -0.661142608 | -0.469168415 | -0.076363144 | downregulated during regeneration - early |
| ENSDART00000163380 | si:key-22o22.2       | 0.002605308 | -0.500713087 | -0.482673389 | -0.426086075 | -0.212897339 | downregulated during regeneration - early |
| ENSDART00000163491 | reep6                | 0.023753852 | -1.146193953 | -0.500723418 | -0.964434532 | -0.007386228 | downregulated during regeneration - early |
| ENSDART00000163523 | sez6l                | 0.009922627 | -0.314616095 | -0.257996779 | -0.399166894 | -0.159678617 | downregulated during regeneration - early |
| ENSDART00000163568 | kcnc1a               | 0.003649921 | -0.672590813 | -0.97944076  | -0.78875743  | -0.1747006   | downregulated during regeneration - early |
| ENSDART00000163597 | CABZ01029366.1       | 0.009204947 | -0.380235128 | -0.253799187 | -0.219703335 | -0.156720283 | downregulated during regeneration - early |
| ENSDART00000163793 | slitrk6              | 0.012145748 | -0.404346501 | -0.384982132 | -0.24261489  | -0.144542921 | downregulated during regeneration - early |
| ENSDART00000163892 | ldha                 | 0.068646243 | -0.444310122 | -0.296598203 | -0.299673411 | -0.138453042 | downregulated during regeneration - early |
| ENSDART00000163952 | zgc:110045           | 0.056216274 | -0.36736834  | -0.55642828  | -0.201308362 | -0.286026212 | downregulated during regeneration - early |
| ENSDART00000164015 | zgc:66483            | 0.030464157 | -0.233929761 | -0.339147918 | -0.342271085 | -0.145997916 | downregulated during regeneration - early |
| ENSDART00000164129 | asic4b               | 2.97728E-05 | -0.92148029  | -1.144921239 | -0.577321683 | -0.304835302 | downregulated during regeneration - early |
| ENSDART00000164506 | dlg1l                | 0.011264952 | -0.401430092 | -0.615035177 | -0.528577315 | -0.282785588 | downregulated during regeneration - early |
| ENSDART00000164581 | galr2b               | 0.012570369 | -0.842297369 | -0.875318855 | -0.561173438 | -0.495794792 | downregulated during regeneration - early |
| ENSDART00000164621 | ndrg4                | 0.023203992 | -0.368994826 | -0.243279912 | -0.209623349 | -0.144971204 | downregulated during regeneration - early |
| ENSDART00000164623 | ctn                  | 0.025195087 | -0.285740219 | -0.301123559 | -0.395585979 | -0.169574914 | downregulated during regeneration - early |
| ENSDART00000164693 | CT583672.1           | 0.003678598 | -0.40975231  | -0.465896033 | -0.295925202 | -0.161007007 | downregulated during regeneration - early |
| ENSDART00000164733 | 43358                | 0.015015416 | -0.353566412 | -0.328984592 | -0.353599969 | -0.269459941 | downregulated during regeneration - early |
| ENSDART00000164844 | riCTORA              | 0.015981762 | -0.308713132 | -0.348726405 | -0.242009414 | -0.189747444 | downregulated during regeneration - early |
| ENSDART00000164890 | pxcd1a               | 0.02057139  | -0.553855303 | -0.268569574 | -0.515208528 | -0.163588555 | downregulated during regeneration - early |
| ENSDART00000164979 | ARHGAP44 (1 of many) | 0.017944789 | -0.298736282 | -0.611440452 | -0.190082373 | -0.04950856  | downregulated during regeneration - early |
| ENSDART00000165115 | adcyc3a              | 0.026979418 | -0.345722559 | -0.440118918 | -0.380340005 | -0.11083624  | downregulated during regeneration - early |
| ENSDART00000165124 | si:ch73-213k20.5     | 0.021047643 | -0.366310901 | -0.428402723 | -0.397554725 | -0.148030091 | downregulated during regeneration - early |
| ENSDART00000165292 | nsmfb                | 0.006359324 | -0.267190978 | -0.447188182 | -0.263868702 | -0.115307671 | downregulated during regeneration - early |
| ENSDART00000165370 | nxph2b               | 0.001996892 | -0.350612818 | -0.344729721 | -0.406615862 | -0.05363573  | downregulated during regeneration - early |
| ENSDART00000165411 | NA                   | 0.000228491 | -0.599585032 | -0.699498667 | -0.398460986 | -0.098816633 | downregulated during regeneration - early |
| ENSDART00000165423 | abcc8b               | 0.052957916 | -0.169557865 | -0.54863705  | -0.322687745 | -0.280461618 | downregulated during regeneration - early |
| ENSDART00000165448 | rims2b               | 0.01901087  | -0.321612136 | -0.490793078 | -0.295423658 | 0.030315799  | downregulated during regeneration - early |
| ENSDART00000165743 | gabrg2               | 0.002854235 | -0.320626657 | -0.470320689 | -0.258833602 | 0.01857369   | downregulated during regeneration - early |
| ENSDART00000165898 | gbe1b                | 0.008897545 | -0.311269447 | -0.395300505 | -0.303280984 | -0.17462698  | downregulated during regeneration - early |
| ENSDART00000165903 | slmapa               | 0.006879176 | -5.974312545 | -3.688098031 | -4.583524263 | -0.943141088 | downregulated during regeneration - early |
| ENSDART00000165912 | si:ch73-380n15.2     | 0.000461528 | -0.521676191 | -0.515528635 | -0.335328887 | -0.345110245 | downregulated during regeneration - early |
| ENSDART00000165979 | sncgb                | 0.004112749 | -0.522103986 | -0.516181722 | -0.379782599 | -0.140861461 | downregulated during regeneration - early |
| ENSDART00000166025 | irs2a                | 0.03450478  | -0.31567938  | -0.330763757 | -0.333387068 | -0.269837586 | downregulated during regeneration - early |
| ENSDART00000166027 | trpc1                | 0.019215781 | -0.303725684 | -0.42864481  | -0.334157939 | -0.231516525 | downregulated during regeneration - early |
| ENSDART00000166042 | vipr2                | 0.00847573  | -0.341756427 | -0.277003119 | -0.379732317 | -0.038627099 | downregulated during regeneration - early |
| ENSDART00000166135 | zbtb47b              | 0.004311817 | -0.402709337 | -0.409852132 | -0.474957603 | -0.394147628 | downregulated during regeneration - early |
| ENSDART00000166148 | gabra1               | 3.38347E-05 | -0.578656795 | -0.788703398 | -0.59715214  | -0.072809071 | downregulated during regeneration - early |
| ENSDART00000166308 | cib2                 | 0.004624842 | -0.434731659 | -0.335262372 | -0.470437684 | -0.240772493 | downregulated during regeneration - early |
| ENSDART00000166315 | pcdh15b              | 0.014638227 | -0.215971807 | -0.468745045 | -0.336826359 | 0.084344716  | downregulated during regeneration - early |
| ENSDART00000166681 | frs1l                | 0.005203275 | -0.4975582   | -0.505651734 | -0.29386319  | -0.136005256 | downregulated during regeneration - early |
| ENSDART00000166730 | slitrk4              | 0.026033323 | -0.433556166 | -0.537605748 | -0.487948345 | -0.301835783 | downregulated during regeneration - early |
| ENSDART00000166889 | nptna                | 0.001225897 | -0.194507678 | -0.523176341 | -0.288117341 | 0.166715743  | downregulated during regeneration - early |
| ENSDART00000166957 | purba                | 0.055560475 | -0.28509761  | -0.466147452 | -0.146018067 | -0.191067595 | downregulated during regeneration - early |
| ENSDART00000167052 | etv1                 | 0.01072353  | -0.327639473 | -0.469002174 | -0.32895701  | -0.22464313  | downregulated during regeneration - early |
| ENSDART00000167164 | MPV17L               | 0.002297766 | -0.408335699 | -0.461800821 | -0.169486828 | -0.082955483 | downregulated during regeneration - early |
| ENSDART00000167451 | NA                   | 0.03168371  | -0.147201966 | -0.622186255 | -0.321157937 | -0.196934609 | downregulated during regeneration - early |
| ENSDART00000167502 | CR855860.1           | 0.030485193 | -0.377799337 | -0.542912736 | -0.423594114 | -0.115674527 | downregulated during regeneration - early |
| ENSDART00000167664 | atxn1a               | 0.004580336 | -0.182914727 | -0.487043114 | -0.17911118  | -0.100136551 | downregulated during regeneration - early |
| ENSDART00000167847 | eef1a1l2             | 0.028902271 | -0.649781637 | -0.501730111 | -0.557800044 | -0.257462283 | downregulated during regeneration - early |
| ENSDART00000168089 | cyp27a7              | 0.044240808 | -0.742372496 | -0.705345887 | -0.793489907 | -0.543448957 | downregulated during regeneration - early |
| ENSDART00000168310 | acap3b               | 0.015781384 | -0.431660294 | -0.622927148 | -0.474200982 | -0.250587028 | downregulated during regeneration - early |
| ENSDART00000168518 | asic4b               | 2.97728E-05 | -0.92148029  | -1.144921239 | -0.577321683 | -0.304835302 | downregulated during regeneration - early |
| ENSDART00000168534 | NPFFR2 (1 of many)   | 0.012462623 | -0.514269049 | -0.40572501  | -0.533037042 | -0.336902595 | downregulated during regeneration - early |
| ENSDART00000168631 | cacna1hb             | 0.008579097 | -0.565978595 | -0.722362792 | -0.435741841 | -0.029665329 | downregulated during regeneration - early |
| ENSDART00000168718 | chrn5a               | 0.033210482 | -0.32077931  | -0.748869105 | -0.317792694 | -0.07500967  | downregulated during regeneration - early |
| ENSDART00000168754 | cacnb2a              | 0.028142339 | -0.312716955 | -0.298709564 | -0.211334034 | -0.110938146 | downregulated during regeneration - early |
| ENSDART00000168821 | CDH22                | 0.019500385 | -0.242258311 | -0.624670054 | -0.303879761 | -0.070304381 | downregulated during regeneration - early |
| ENSDART00000168920 | nbeab                | 0.028147746 | -0.251742312 | -0.363594185 | -0.174304201 | -0.037829821 | downregulated during regeneration - early |
| ENSDART00000169040 | si:ch211-235e9.8     | 0.001532808 | -0.436326332 | -0.357257361 | -0.23322888  | -0.084450729 | downregulated during regeneration - early |
| ENSDART00000169108 | kcnj12a              | 0.013360877 | -0.480725794 | -0.616905664 | -0.509410819 | -0.355199716 | downregulated during regeneration - early |
| ENSDART00000169136 | CABZ01007222.1       | 0.002957541 | -0.363042867 | -0.477045243 | -0.379599521 | -0.116458215 | downregulated during regeneration - early |
| ENSDART00000169548 | rgs7b                | 0.024602158 | -0.179117493 | -0.337814246 | -0.235695562 | -0.091038288 | downregulated during regeneration - early |
| ENSDART00000169609 | tefb                 | 0.032368681 | -0.156114581 | -0.555141888 | -0.301378906 | -0.24132076  | downregulated during regeneration - early |
| ENSDART00000169687 | dlg1                 | 0.023714388 | -0.200796553 | -0.39742906  | -0.281934456 | -0.007509175 | downregulated during regeneration - early |
| ENSDART00000169746 | ampd2a               | 0.000935288 | -0.446564291 | -0.523779729 | -0.426555345 | -0.117905151 | downregulated during regeneration - early |
| ENSDART00000169764 | sytl1a               | 0.009024763 | -0.535633412 | -0.482595993 | -0.403145231 | -0.029612735 | downregulated during regeneration - early |
| ENSDART00000169810 | stub1                | 0.029463211 | -0.352758303 | -0.248739956 | -0.212157701 | -0.100812458 | downregulated during regeneration - early |
| ENSDART00000170362 | CABZ01088490.1       | 0.001365289 | -0.602203241 | -0.75748097  | -0.591873288 | -0.034015136 | downregulated during regeneration - early |
| ENSDART00000170709 | st8sia1              | 0.007584916 | -0.358435626 | -0.336878724 | -0.21402261  | -0.093884674 | downregulated during regeneration - early |

|                     |                      |             |               |              |              |              |                                           |
|---------------------|----------------------|-------------|---------------|--------------|--------------|--------------|-------------------------------------------|
| ENSDART00000170993  | afmid                | 0.002016009 | -0.391958822  | -0.311185654 | -0.48659874  | -0.071120804 | downregulated during regeneration - early |
| ENSDART00000170998  | tnrc6c2              | 0.033092405 | -0.257719977  | -0.319066529 | -0.317919253 | -0.242876098 | downregulated during regeneration - early |
| ENSDART00000171014  | ptprfa               | 0.004256148 | -0.231763582  | -0.479834972 | -0.30404021  | -0.129420632 | downregulated during regeneration - early |
| ENSDART00000171041  | tceb3                | 0.028527553 | -0.063048764  | -0.305499388 | -0.056078786 | -0.065276347 | downregulated during regeneration - early |
| ENSDART00000171182  | FO704914.1           | 0.000532548 | -0.372200999  | -0.770608409 | -0.45129487  | -0.014659406 | downregulated during regeneration - early |
| ENSDART00000171215  | slc6a3               | 0.001490782 | -0.667608441  | -0.754783262 | -0.446986408 | -0.343120625 | downregulated during regeneration - early |
| ENSDART00000171426  | pdzph1               | 0.00721984  | -0.416069913  | -0.411889039 | -0.457121209 | -0.221062124 | downregulated during regeneration - early |
| ENSDART00000171496  | CDK18                | 0.00320961  | -0.371495713  | -0.374286185 | -0.433391037 | -0.282164654 | downregulated during regeneration - early |
| ENSDART00000171523  | CABZ01089030.1       | 0.001040281 | -0.307376632  | -0.51118876  | -0.528168137 | -0.25789403  | downregulated during regeneration - early |
| ENSDART00000171683  | GABRG1               | 0.028772568 | -0.455034367  | -0.392373746 | -0.437520168 | -0.270886274 | downregulated during regeneration - early |
| ENSDART00000171696  | sergef               | 0.00024376  | -0.83692277   | -0.920324583 | -0.711315475 | -0.040508735 | downregulated during regeneration - early |
| ENSDART00000171711  | gpsm1a               | 0.009294776 | -0.376386863  | -0.294884117 | -0.277096957 | -0.079488929 | downregulated during regeneration - early |
| ENSDART00000171728  | FO323156.1           | 0.000261206 | -0.3925045    | -0.548422409 | -0.578285827 | -0.21374206  | downregulated during regeneration - early |
| ENSDART00000171743  | sypa                 | 0.000648054 | -0.458751426  | -0.455626528 | -0.334063629 | -0.142465032 | downregulated during regeneration - early |
| ENSDART00000171749  | TMEM150A (1 of many) | 0.00159523  | -0.745537318  | -0.560172793 | -0.666392254 | -0.39318407  | downregulated during regeneration - early |
| ENSDART00000171762  | arhgef11             | 0.023596757 | -0.293734421  | -0.490220654 | -0.20280274  | 0.049910063  | downregulated during regeneration - early |
| ENSDART00000171777  | sy7b                 | 0.000155554 | -0.587310767  | -0.899783938 | -0.612333236 | -0.170082745 | downregulated during regeneration - early |
| ENSDART00000171868  | sgut1                | 0.013366886 | -0.438334002  | -0.252211506 | -0.468859348 | -0.232780566 | downregulated during regeneration - early |
| ENSDART00000171935  | brpf3a               | 0.010653756 | -0.333420883  | -0.26685281  | -0.204490748 | -0.091216638 | downregulated during regeneration - early |
| ENSDART00000171948  | zgc:172282           | 0.000409858 | -0.447105187  | -0.64749442  | -0.36124568  | -0.081452365 | downregulated during regeneration - early |
| ENSDART00000172045  | zgc:73340            | 0.004702472 | -0.432558368  | -0.571519732 | -0.606453829 | -0.389736033 | downregulated during regeneration - early |
| ENSDART00000172128  | sez6l                | 0.001036975 | -0.457515145  | -0.649880208 | -0.297003963 | -0.214224661 | downregulated during regeneration - early |
| ENSDART00000172149  | sh3rf2               | 0.000935288 | -0.359308533  | -0.521296357 | -0.501584275 | -0.200324498 | downregulated during regeneration - early |
| ENSDART00000172218  | nscmf                | 0.001185822 | -0.786748472  | -1.480880504 | -0.428989171 | -0.523180434 | downregulated during regeneration - early |
| ENSDART00000172267  | KCNV1                | 0.026772289 | -0.730291266  | -0.683938113 | -0.423486953 | -0.317970814 | downregulated during regeneration - early |
| ENSDART00000172310  | zbtb4                | 0.013310088 | -0.365422353  | -0.277101341 | -0.237436935 | -0.247791483 | downregulated during regeneration - early |
| ENSDART00000172329  | CABZ01084963.1       | 0.005531203 | -0.076477014  | -0.479017439 | -0.153366972 | -0.215592031 | downregulated during regeneration - early |
| ENSDART00000172336  | cabp2a               | 0.007145684 | -0.40143904   | -0.491969769 | -0.23184904  | -0.50001549  | downregulated during regeneration - early |
| ENSDART00000172337  | rhot1a               | 0.009491292 | -3.878236672  | -5.686158747 | -0.665991717 | -0.822715826 | downregulated during regeneration - early |
| ENSDART00000172373  | ompa                 | 0.040539001 | -0.333379791  | -0.33389964  | -0.383107757 | -0.229559723 | downregulated during regeneration - early |
| ENSDART00000172496  | add3a                | 0.056985155 | -0.173242509  | -0.314301562 | -0.183893521 | -0.110146899 | downregulated during regeneration - early |
| ENSDART00000172661  | nrgnb                | 0.0006387   | -0.441646104  | -0.659637875 | -0.590118296 | -0.403632798 | downregulated during regeneration - early |
| ENSDART00000172689  | drd4a                | 0.00510387  | -0.269065132  | -0.433761644 | -0.356034882 | -0.090259185 | downregulated during regeneration - early |
| ENSDART00000172862  | kcnj14               | 0.044172739 | -0.439592228  | -0.323667837 | -0.482461949 | -0.197270237 | downregulated during regeneration - early |
| ENSDART00000173109  | nrtm                 | 0.012342358 | -0.527610722  | -0.443827628 | -0.46689713  | -0.285016979 | downregulated during regeneration - early |
| ENSDART00000173113  | si:ch211-129p13.1    | 0.001328724 | -0.64452233   | -0.696136912 | -0.478469763 | -0.206239945 | downregulated during regeneration - early |
| ENSDART00000173119  | pcdh11               | 0.000993187 | -0.4634370446 | -0.732192902 | -0.531501202 | -0.25060062  | downregulated during regeneration - early |
| ENSDART00000173133  | utrn                 | 0.064203588 | -0.11206335   | -0.324597481 | -0.223274112 | -0.197393841 | downregulated during regeneration - early |
| ENSDART00000173134  | BX571952.1           | 0.000520606 | -0.551010684  | -0.633352911 | -0.460069257 | -0.004126181 | downregulated during regeneration - early |
| ENSDART00000173386  | cacna1da             | 0.028175613 | -0.09786225   | -0.344686882 | -0.169985603 | 0.048564501  | downregulated during regeneration - early |
| ENSDART00000000069  | slc9a3r1a            | 0.024869861 | -0.019828621  | -0.165099619 | -0.579587833 | -0.318451026 | downregulated during regeneration - mid   |
| ENSDART000000000192 | ptpn4b               | 0.005203881 | -0.253123991  | -0.355280061 | -0.416236309 | -0.192007    | downregulated during regeneration - mid   |
| ENSDART00000002029  | fkbp8                | 0.030637152 | -0.081020923  | -0.107047698 | -0.329759128 | -0.094897987 | downregulated during regeneration - mid   |
| ENSDART00000003170  | mid1ip1l             | 0.009183287 | -0.359873821  | -0.329776238 | -0.564188118 | -0.321447922 | downregulated during regeneration - mid   |
| ENSDART00000003335  | snx12                | 0.02794941  | -0.102084433  | -0.181980514 | -0.47779818  | -0.16493026  | downregulated during regeneration - mid   |
| ENSDART00000003465  | gipc2                | 0.02229367  | -0.142551263  | -0.216969239 | -0.344609382 | -0.269869981 | downregulated during regeneration - mid   |
| ENSDART00000003939  | syng1a               | 0.024987601 | 0.053450312   | -0.149997984 | -0.371497084 | -0.066149387 | downregulated during regeneration - mid   |
| ENSDART00000004075  | uqcq2                | 0.023840313 | -0.167833305  | -0.222493804 | -0.340331706 | -0.224913678 | downregulated during regeneration - mid   |
| ENSDART000000004241 | inhbaa               | 0.001317626 | 0.208890493   | -0.32024378  | -0.370155553 | -0.220482209 | downregulated during regeneration - mid   |
| ENSDART00000004420  | rab4a                | 0.034580091 | -0.104588348  | -0.223085036 | -0.330744686 | -0.154422823 | downregulated during regeneration - mid   |
| ENSDART00000005573  | tmem237b             | 0.009950411 | 0.093826402   | -0.187405072 | -0.456194249 | -0.210768209 | downregulated during regeneration - mid   |
| ENSDART00000005590  | churc1               | 0.018990086 | -0.030881068  | -0.24423848  | -0.319974325 | -0.284115834 | downregulated during regeneration - mid   |
| ENSDART00000005733  | tma16                | 0.047982796 | -0.013223994  | -0.144098168 | -0.425909208 | -0.168461973 | downregulated during regeneration - mid   |
| ENSDART00000005957  | lrit1a               | 0.025420775 | -0.250152343  | -0.282879742 | -0.392873609 | -0.351289311 | downregulated during regeneration - mid   |
| ENSDART00000006927  | use1                 | 0.036974502 | -0.314698173  | -0.230168127 | -0.342013543 | -0.20782604  | downregulated during regeneration - mid   |
| ENSDART00000007021  | atp6v1ba             | 0.031629016 | -0.168038972  | -0.268033099 | -0.367112615 | -0.152327119 | downregulated during regeneration - mid   |
| ENSDART00000008302  | insr                 | 0.048141934 | -0.066772744  | -0.178139649 | -0.319689592 | -0.098012672 | downregulated during regeneration - mid   |
| ENSDART00000009740  | smad7                | 0.030913639 | -0.082405078  | -0.352637537 | -0.492507075 | -0.066549718 | downregulated during regeneration - mid   |
| ENSDART00000010378  | myo3b                | 0.013233841 | 0.121341422   | -0.396947151 | -0.677290933 | -0.232688387 | downregulated during regeneration - mid   |
| ENSDART00000011149  | fam185a              | 0.051285619 | -0.225870361  | -0.305876809 | -0.396323932 | -0.356813487 | downregulated during regeneration - mid   |
| ENSDART00000011229  | sub1b                | 0.026680132 | -0.082257398  | -0.179031151 | -0.405374566 | -0.271111897 | downregulated during regeneration - mid   |
| ENSDART00000011317  | ntm                  | 0.027578317 | -0.235410973  | -0.452806913 | -0.580240928 | -0.252707536 | downregulated during regeneration - mid   |
| ENSDART00000012229  | fkbp1b               | 0.049049155 | -0.199888531  | -0.218085861 | -0.490853212 | -0.25173597  | downregulated during regeneration - mid   |
| ENSDART00000012376  | gabrr1               | 0.006630005 | -0.44264456   | -0.314539223 | -0.677749333 | -0.339326443 | downregulated during regeneration - mid   |
| ENSDART00000012478  | mmadh                | 0.028172785 | -0.099759671  | -0.214733382 | -0.311326383 | -0.186284094 | downregulated during regeneration - mid   |
| ENSDART00000012938  | phgdh                | 0.077650287 | -0.315221747  | -0.241109028 | -0.448879252 | -0.249449553 | downregulated during regeneration - mid   |
| ENSDART00000013411  | cahz                 | 0.037241402 | -0.282657507  | -0.146895201 | -0.382063619 | -0.133810291 | downregulated during regeneration - mid   |
| ENSDART00000013829  | tmbim4               | 0.056276304 | -0.093382601  | -0.138429676 | -0.303111951 | -0.191824583 | downregulated during regeneration - mid   |
| ENSDART00000014021  | slc25a39             | 0.007324183 | -0.175830036  | -0.233948732 | -0.630252381 | -0.299226836 | downregulated during regeneration - mid   |
| ENSDART00000014031  | dpf2                 | 0.020424071 | 0.062076591   | -0.192206303 | -0.356876024 | -0.045146421 | downregulated during regeneration - mid   |
| ENSDART00000014632  | katnb1               | 0.009776962 | -0.1660519    | -0.366507385 | -0.386560357 | -0.02476169  | downregulated during regeneration - mid   |
| ENSDART00000015710  | snrk                 | 0.033001298 | -0.234771599  | -0.444259361 | -0.383002363 | -0.24868656  | downregulated during regeneration - mid   |
| ENSDART00000015755  | rasl11b              | 0.004084205 | -0.21929532   | -0.630137444 | -0.720127948 | -0.404206999 | downregulated during regeneration - mid   |
| ENSDART00000015951  | bsg                  | 0.037560436 | -0.039046362  | -0.213267965 | -0.489263219 | -0.308938953 | downregulated during regeneration - mid   |
| ENSDART00000016099  | CASKIN2              | 0.026969746 | -0.196661177  | -0.318487444 | -0.498724654 | -0.242993173 | downregulated during regeneration - mid   |

|                    |                  |             |              |              |              |              |                                         |
|--------------------|------------------|-------------|--------------|--------------|--------------|--------------|-----------------------------------------|
| ENSDART00000016803 | grpel1           | 0.047568271 | -0.106418203 | -0.12256904  | -0.467582595 | -0.298130125 | downregulated during regeneration - mid |
| ENSDART00000018047 | zgc:112294       | 0.033754546 | -0.129085452 | -0.359907528 | -0.863079854 | -0.32905376  | downregulated during regeneration - mid |
| ENSDART00000018117 | ppp1r14aa        | 0.009559586 | -0.10674343  | -0.179038105 | -0.425069279 | -0.232436913 | downregulated during regeneration - mid |
| ENSDART00000018972 | zgc:92818        | 0.010173835 | 0.012004445  | -0.040419062 | -0.784852086 | -0.38349701  | downregulated during regeneration - mid |
| ENSDART00000019053 | faimc            | 0.060563605 | -0.147906168 | -0.161120397 | -0.35996788  | -0.164587924 | downregulated during regeneration - mid |
| ENSDART00000021260 | sept8b           | 0.002390041 | -0.246039495 | -0.120094514 | -0.518439508 | -0.250786208 | downregulated during regeneration - mid |
| ENSDART00000021346 | arl3l2           | 0.060063095 | -0.339022452 | -0.304754125 | -0.490852638 | -0.247921956 | downregulated during regeneration - mid |
| ENSDART00000022393 | si:dkeyp-57f11.2 | 0.005040201 | 0.163453067  | -0.122007101 | -0.459561011 | 0.032532197  | downregulated during regeneration - mid |
| ENSDART00000022688 | tob1b            | 0.00387273  | -0.393522131 | -0.102261171 | -0.612204875 | -0.372656833 | downregulated during regeneration - mid |
| ENSDART00000022998 | ANO2 (1 of many) | 0.026969746 | 0.005158406  | -0.146342409 | -0.548931715 | -0.196350546 | downregulated during regeneration - mid |
| ENSDART00000023588 | guca1a           | 0.012263789 | 0.527717677  | -0.52699324  | -1.299472888 | -0.244316084 | downregulated during regeneration - mid |
| ENSDART00000023686 | ankrd33ab        | 0.007529247 | -0.23872945  | -0.400254403 | -1.062972805 | -0.551724897 | downregulated during regeneration - mid |
| ENSDART00000023953 | zgc:110319       | 0.067739819 | -0.195130618 | -0.122813174 | -0.337219496 | -0.098833156 | downregulated during regeneration - mid |
| ENSDART00000024136 | ngt2a            | 0.005454674 | 0.175894019  | 0.078473268  | -0.788482627 | -0.299650763 | downregulated during regeneration - mid |
| ENSDART00000024331 | glsb             | 0.018752626 | 0.029280722  | -0.254060441 | -0.66092512  | -0.487127171 | downregulated during regeneration - mid |
| ENSDART00000024619 | gorasp1a         | 0.010796842 | -0.145027203 | -0.174354089 | -0.499227113 | -0.186036756 | downregulated during regeneration - mid |
| ENSDART00000025046 | ppp1caa          | 0.031235096 | 0.04938914   | -0.175273742 | -0.396680839 | -0.049267892 | downregulated during regeneration - mid |
| ENSDART00000025414 | slc2a1a          | 0.029003347 | 0.059681786  | -0.155207235 | -0.469818878 | -0.137194664 | downregulated during regeneration - mid |
| ENSDART00000025962 | gyg1a            | 0.016443396 | -0.132586486 | -0.231554909 | -0.320101499 | -0.261622046 | downregulated during regeneration - mid |
| ENSDART00000026692 | ubtd1a           | 0.001139558 | -0.10869502  | -0.342278946 | -0.985605367 | -0.704345293 | downregulated during regeneration - mid |
| ENSDART00000027050 | nga3b            | 0.004666996 | -0.139313288 | -0.277511971 | -1.175814494 | -0.697938349 | downregulated during regeneration - mid |
| ENSDART00000027454 | si:ch211-20711.2 | 0.016936477 | -0.470697042 | -0.923472632 | -1.21436549  | -0.514660002 | downregulated during regeneration - mid |
| ENSDART00000028048 | necap1           | 0.01084285  | -0.117195999 | -0.341344035 | -0.478671947 | -0.252467934 | downregulated during regeneration - mid |
| ENSDART00000029459 | gipr             | 0.007928614 | -0.120368109 | -0.334116608 | -0.559985722 | -0.423861096 | downregulated during regeneration - mid |
| ENSDART00000029774 | tmem55bb         | 0.04854903  | -0.096321571 | -0.196356812 | -0.337053328 | -0.094153869 | downregulated during regeneration - mid |
| ENSDART00000030885 | ucl1a            | 0.010869905 | 0.183203205  | -0.212616494 | -0.705475026 | -0.013040484 | downregulated during regeneration - mid |
| ENSDART00000030920 | gid8a            | 0.037565208 | -0.116648875 | -0.277182294 | -0.355798783 | -0.233597587 | downregulated during regeneration - mid |
| ENSDART00000031426 | skilb            | 0.000177771 | -0.234186907 | -0.553407151 | -0.565936684 | -0.420869627 | downregulated during regeneration - mid |
| ENSDART00000031638 | slc48a1a         | 0.029570651 | -0.121591299 | -0.156663294 | -0.340136476 | -0.182759405 | downregulated during regeneration - mid |
| ENSDART00000031650 | hsp70l           | 0.005097739 | -0.846526969 | -1.057845455 | -1.357523269 | -1.215078404 | downregulated during regeneration - mid |
| ENSDART00000032459 | aqp1a.1          | 0.010333906 | -0.275584647 | -0.402261221 | -0.531838868 | -0.410567004 | downregulated during regeneration - mid |
| ENSDART00000033325 | slc25a2a         | 0.027461561 | 0.429859875  | -0.309149544 | -0.52291133  | -0.286046915 | downregulated during regeneration - mid |
| ENSDART00000034441 | tcp11l2          | 0.019467351 | 0.020775808  | -0.208761169 | -0.796222831 | -0.248557177 | downregulated during regeneration - mid |
| ENSDART00000034705 | ntmt1            | 0.034977529 | -0.020729663 | -0.187405157 | -0.44452011  | -0.329716724 | downregulated during regeneration - mid |
| ENSDART00000036373 | cfap206          | 0.011264004 | 0.026049802  | 0.014543106  | -0.421468514 | -0.063922477 | downregulated during regeneration - mid |
| ENSDART00000037065 | sccpdhb          | 0.030676359 | -0.135500672 | -0.263394229 | -0.35527789  | -0.147169147 | downregulated during regeneration - mid |
| ENSDART00000038924 | sult1st1         | 0.028350112 | 0.04233301   | -0.129133641 | -0.497646461 | -0.249352869 | downregulated during regeneration - mid |
| ENSDART00000039295 | lrrfp1a          | 0.001138119 | 0.201172846  | -0.052744603 | -0.60255637  | -0.234396047 | downregulated during regeneration - mid |
| ENSDART00000039485 | gabrarpl2        | 0.031009754 | -0.111002032 | -0.162035427 | -0.331707696 | -0.213225245 | downregulated during regeneration - mid |
| ENSDART00000040116 | tnrc5            | 0.037247868 | -0.132560784 | -0.181210054 | -0.368693498 | -0.22290886  | downregulated during regeneration - mid |
| ENSDART00000040346 | efr3ba           | 0.045439062 | -0.15754636  | -0.295932904 | -0.334562517 | -0.212090743 | downregulated during regeneration - mid |
| ENSDART00000041417 | camk1b           | 0.063189142 | -0.259356662 | -0.222277099 | -0.408590245 | -0.120593834 | downregulated during regeneration - mid |
| ENSDART00000041443 | igsf21a          | 0.078639351 | -0.224595347 | -0.278632007 | -0.419145006 | -0.220026937 | downregulated during regeneration - mid |
| ENSDART00000041707 | unc119a          | 0.031766969 | -0.21008147  | -0.190962771 | -0.5453967   | -0.153347487 | downregulated during regeneration - mid |
| ENSDART00000042276 | nrxp1            | 0.036299878 | -0.320960824 | -0.220038641 | -0.50268354  | -0.230788559 | downregulated during regeneration - mid |
| ENSDART00000042572 | ablim1b          | 0.036021217 | 0.023130185  | -0.084172657 | -0.818233794 | -0.360713717 | downregulated during regeneration - mid |
| ENSDART00000042599 | dennd6aa         | 0.041657173 | -0.0532753   | -0.029202145 | -0.371955611 | -0.136277272 | downregulated during regeneration - mid |
| ENSDART00000043492 | trappc6bl        | 0.010042504 | -0.12751818  | -0.21743347  | -0.476970052 | -0.302538631 | downregulated during regeneration - mid |
| ENSDART00000043507 | ciarta           | 0.063631477 | -0.034891069 | -0.156171585 | -0.423543489 | -0.111653268 | downregulated during regeneration - mid |
| ENSDART00000043801 | cabp5b           | 0.010073304 | -0.44296443  | -0.237302409 | -0.884658288 | -0.372660272 | downregulated during regeneration - mid |
| ENSDART00000043855 | dclk2a           | 0.001528476 | -0.104441255 | -0.395008642 | -0.62766162  | -0.184810585 | downregulated during regeneration - mid |
| ENSDART00000043953 | mfsd2b           | 0.011605032 | -0.226277331 | -0.20295362  | -0.451440771 | 0.020277702  | downregulated during regeneration - mid |
| ENSDART00000045303 | tmprss9          | 0.052101742 | -0.116725282 | -0.194770382 | -0.365140883 | -0.064254559 | downregulated during regeneration - mid |
| ENSDART00000045374 | sma3a            | 0.043076195 | -0.063329624 | -0.157712113 | -0.303211349 | -0.108940629 | downregulated during regeneration - mid |
| ENSDART00000046066 | capn1a           | 0.045050212 | -0.174433704 | -0.141559786 | -0.304523077 | -0.134358035 | downregulated during regeneration - mid |
| ENSDART00000046951 | ptpn11b          | 0.011788375 | -0.12533317  | -0.212829251 | -0.391615008 | -0.186327808 | downregulated during regeneration - mid |
| ENSDART00000047362 | msra             | 0.006658285 | -0.031803809 | -0.196438308 | -0.422002476 | -0.295991402 | downregulated during regeneration - mid |
| ENSDART00000049885 | si:dkey-172j4.3  | 0.036535058 | -0.146868316 | -0.089398841 | -0.317501099 | -0.03734398  | downregulated during regeneration - mid |
| ENSDART00000050202 | rcan3            | 0.007786427 | -0.240590006 | -0.307380747 | -0.423427653 | -0.130410568 | downregulated during regeneration - mid |
| ENSDART00000050271 | hexb             | 0.004813371 | 0.237342774  | -0.182676311 | -0.489143261 | -0.233593029 | downregulated during regeneration - mid |
| ENSDART00000050750 | rrm2b            | 0.073861488 | -0.324758311 | -0.221575036 | -0.394470152 | -0.266012642 | downregulated during regeneration - mid |
| ENSDART00000051566 | zgc:101016       | 0.024284969 | 0.072400267  | -0.278957969 | -0.822407258 | -0.192676389 | downregulated during regeneration - mid |
| ENSDART00000052065 | si:rp71-39b20.4  | 0.019747468 | -0.313076871 | -0.443642109 | -0.50831344  | -0.2481846   | downregulated during regeneration - mid |
| ENSDART00000052318 | mdka             | 0.007797716 | -0.324471926 | -0.37363799  | -0.54050807  | -0.370260207 | downregulated during regeneration - mid |
| ENSDART00000052322 | zgc:110699       | 0.012719677 | -0.266905411 | -0.248249293 | -0.482205646 | -0.223841905 | downregulated during regeneration - mid |
| ENSDART00000053367 | hmgn3            | 0.044180927 | -0.174648563 | -0.165335262 | -0.310027237 | -0.181225286 | downregulated during regeneration - mid |
| ENSDART00000053494 | anks4b           | 0.048286815 | -0.562445249 | -0.270911364 | -0.580434775 | -0.289114333 | downregulated during regeneration - mid |
| ENSDART00000054007 | slc8a4b          | 0.027048639 | -0.011734483 | -0.299949751 | -0.451416872 | -0.315264472 | downregulated during regeneration - mid |
| ENSDART00000054408 | gsg1l            | 0.001512737 | -0.338795387 | -0.334881942 | -0.642215658 | -0.428166696 | downregulated during regeneration - mid |
| ENSDART00000054472 | tlil             | 0.030023854 | -0.241128673 | -0.208136    | -0.494254448 | -0.202017577 | downregulated during regeneration - mid |
| ENSDART00000054760 | zgc:162144       | 0.018655612 | -0.154581168 | -0.586579914 | -0.580706302 | -0.278802593 | downregulated during regeneration - mid |
| ENSDART00000055186 | atp5j2           | 0.01462956  | -0.168904246 | -0.309514947 | -0.449394402 | -0.201772036 | downregulated during regeneration - mid |
| ENSDART00000055611 | isca2            | 0.041099023 | -0.127743819 | -0.187288303 | -0.524298231 | -0.307747827 | downregulated during regeneration - mid |
| ENSDART00000055817 | PIGG             | 0.023931815 | -0.041747749 | -0.262998575 | -0.390921965 | -0.198616638 | downregulated during regeneration - mid |
| ENSDART00000056213 | pik3r1           | 0.029029749 | -0.34639661  | -0.306212461 | -0.436349985 | -0.247937167 | downregulated during regeneration - mid |

|                   |                  |             |               |              |              |              |                                         |
|-------------------|------------------|-------------|---------------|--------------|--------------|--------------|-----------------------------------------|
| ENSDART0000056734 | setd7            | 0.028411307 | -0.044426299  | -0.050437779 | -0.332150365 | -0.191170985 | downregulated during regeneration - mid |
| ENSDART0000056735 | rgs20            | 0.035861975 | -0.263112929  | -0.317514258 | -0.646869905 | -0.425880318 | downregulated during regeneration - mid |
| ENSDART0000056927 | egl1a            | 0.069201585 | -0.373304639  | -0.331810821 | -0.548972472 | -0.202283187 | downregulated during regeneration - mid |
| ENSDART0000057918 | si:ch211-147h1.4 | 0.006788162 | 0.058919084   | -0.340722361 | -0.680330981 | -0.211102009 | downregulated during regeneration - mid |
| ENSDART0000057957 | itm2cb           | 0.004277486 | -0.410626815  | -0.396999775 | -0.657592832 | -0.426965619 | downregulated during regeneration - mid |
| ENSDART0000058255 | bbs5             | 0.033037209 | -0.153890395  | -0.351139568 | -0.380364475 | -0.12338798  | downregulated during regeneration - mid |
| ENSDART0000058339 | ap3s2            | 0.051751157 | -0.205243617  | -0.191498501 | -0.306412801 | -0.176311273 | downregulated during regeneration - mid |
| ENSDART0000058470 | pik3r1           | 0.020653282 | -0.272621258  | -0.391826992 | -0.565271638 | -0.177820971 | downregulated during regeneration - mid |
| ENSDART0000058628 | ccsapb           | 0.038389384 | -0.109779777  | -0.249497929 | -0.321372328 | -0.061077705 | downregulated during regeneration - mid |
| ENSDART0000058785 | fam210ab         | 0.009653548 | -0.074078069  | -0.284264661 | -0.891770658 | -0.393378695 | downregulated during regeneration - mid |
| ENSDART0000058936 | scamp5b          | 0.046680552 | -0.278094691  | -0.317619737 | -0.403892079 | -0.134676622 | downregulated during regeneration - mid |
| ENSDART0000060001 | pnp6             | 0.007828891 | -0.139557872  | -0.321502493 | -0.386186078 | -0.030509602 | downregulated during regeneration - mid |
| ENSDART0000060015 | chka             | 0.008595135 | -0.144451922  | -0.274568124 | -0.456317122 | -0.171918553 | downregulated during regeneration - mid |
| ENSDART0000060184 | chka             | 0.004120762 | -0.101617548  | -0.321325171 | -0.420229119 | -0.136541498 | downregulated during regeneration - mid |
| ENSDART0000060532 | zgc:110796       | 0.029635773 | -0.139659209  | -0.284517331 | -0.33969202  | -0.16468656  | downregulated during regeneration - mid |
| ENSDART0000061106 | bhlhe41          | 0.000553147 | 0.043056173   | -0.423617996 | -0.754959095 | -0.246095493 | downregulated during regeneration - mid |
| ENSDART0000061265 | rnf141           | 0.032782977 | -0.123799033  | -0.215585747 | -0.342006011 | -0.212187704 | downregulated during regeneration - mid |
| ENSDART0000061745 | inpp4ab          | 0.000385909 | -0.337306716  | -0.947773917 | -0.831022148 | -0.394471236 | downregulated during regeneration - mid |
| ENSDART0000062402 | tpd52l1          | 0.005726323 | -0.180007689  | -0.341056198 | -0.772074089 | -0.368132956 | downregulated during regeneration - mid |
| ENSDART0000062556 | sod2             | 0.00889295  | -0.183508685  | -0.287491323 | -0.424543766 | -0.237833299 | downregulated during regeneration - mid |
| ENSDART0000062935 | heca             | 0.065650579 | -0.1371152131 | -0.569989768 | -0.691744059 | -0.51577268  | downregulated during regeneration - mid |
| ENSDART0000063835 | otx5             | 0.082497078 | -0.207695123  | -0.226833273 | -0.417236259 | -0.126675877 | downregulated during regeneration - mid |
| ENSDART0000063944 | tmem30ab         | 0.018132587 | -0.052321591  | -0.186777496 | -0.351757869 | -0.167369044 | downregulated during regeneration - mid |
| ENSDART0000064738 | atp1f1b          | 0.005335064 | -0.12888408   | -0.286001583 | -0.530012586 | -0.266598201 | downregulated during regeneration - mid |
| ENSDART0000064842 | padi2            | 0.046738515 | -0.110475283  | -0.200123181 | -0.394420172 | -0.195593685 | downregulated during regeneration - mid |
| ENSDART0000064913 | fto              | 0.054038459 | -0.098234146  | -0.428383355 | -0.257568512 | -0.239748235 | downregulated during regeneration - mid |
| ENSDART0000065143 | unc119b          | 0.020870612 | -0.086346577  | -0.282642438 | -0.651558775 | -0.265879719 | downregulated during regeneration - mid |
| ENSDART0000065467 | dedd1            | 0.0321404   | -0.00326722   | -0.100306912 | -0.35251663  | -0.041277003 | downregulated during regeneration - mid |
| ENSDART0000065755 | gpn3             | 0.095709295 | -0.172157475  | -0.155442383 | -0.381057864 | -0.19097226  | downregulated during regeneration - mid |
| ENSDART0000066256 | vti1a            | 0.042541047 | -0.147124368  | -0.216073091 | -0.331785573 | -0.195609352 | downregulated during regeneration - mid |
| ENSDART0000066259 | kcnk1a           | 0.055503316 | -0.289802216  | -0.227947241 | -0.67177     | -0.392395516 | downregulated during regeneration - mid |
| ENSDART0000066380 | ca7              | 0.023602236 | -0.236035328  | -0.017625204 | -0.765902599 | -0.026455411 | downregulated during regeneration - mid |
| ENSDART0000066382 | aqp8a.1          | 0.025161694 | -0.164652843  | -0.325293072 | -0.493634593 | -0.109118528 | downregulated during regeneration - mid |
| ENSDART0000066655 | mybl1            | 0.005666275 | -0.255810306  | -0.487313899 | -0.72749049  | -0.668391364 | downregulated during regeneration - mid |
| ENSDART0000066963 | atp6v1f          | 0.047327566 | -0.089791813  | -0.169571399 | -0.304106913 | -0.234245815 | downregulated during regeneration - mid |
| ENSDART0000067005 | bcat1            | 0.046674561 | -0.064708558  | -0.22197643  | -0.301840187 | -0.097404482 | downregulated during regeneration - mid |
| ENSDART0000067078 | plekhg5a         | 0.081075709 | -0.147306721  | -0.274518319 | -0.553438847 | -0.255866929 | downregulated during regeneration - mid |
| ENSDART0000067448 | acat1            | 0.021507957 | -0.217922513  | -0.251881532 | -0.396031362 | -0.209577052 | downregulated during regeneration - mid |
| ENSDART0000067510 | crabp1a          | 0.029243935 | -0.186487239  | -0.41656224  | -0.606281006 | -0.420918895 | downregulated during regeneration - mid |
| ENSDART0000067764 | stk17a           | 0.02229764  | -0.185636748  | -0.198053553 | -0.515379898 | -0.253038095 | downregulated during regeneration - mid |
| ENSDART0000073694 | smu1b            | 0.006932921 | -0.023572641  | -0.696487436 | -0.934479138 | -0.393819626 | downregulated during regeneration - mid |
| ENSDART0000073932 | NA               | 0.003072278 | 0.121194935   | -0.376988949 | -0.788016576 | -0.265683315 | downregulated during regeneration - mid |
| ENSDART0000074117 | aspa             | 0.007828891 | -0.032383232  | -0.304124913 | -0.397629458 | -0.358898864 | downregulated during regeneration - mid |
| ENSDART0000075070 | hsf2             | 0.014034602 | -0.066635095  | -0.276496416 | -0.474097609 | -0.186498896 | downregulated during regeneration - mid |
| ENSDART0000075421 | sord             | 0.017496481 | -0.008165085  | -0.251228216 | -0.437538687 | -0.226988953 | downregulated during regeneration - mid |
| ENSDART0000075513 | aqp9b            | 0.023071688 | -0.181865878  | -0.358464178 | -0.54013493  | -0.322928595 | downregulated during regeneration - mid |
| ENSDART0000076929 | prkg2            | 0.055091796 | -0.322610383  | -0.221985796 | -0.523406711 | -0.304941411 | downregulated during regeneration - mid |
| ENSDART0000077619 | b3gat1b          | 0.017905694 | -0.266663197  | -0.223974588 | -0.393683459 | -0.125347427 | downregulated during regeneration - mid |
| ENSDART0000077724 | gnb5b            | 0.032645202 | -0.216593155  | -0.279473554 | -0.485943487 | -0.092161444 | downregulated during regeneration - mid |
| ENSDART0000077839 | atf7b            | 0.014656899 | -0.232485852  | -0.196508033 | -0.391624214 | -0.206346003 | downregulated during regeneration - mid |
| ENSDART0000078014 | poldip2          | 0.028918785 | 0.012504595   | -0.191194187 | -0.45353852  | -0.221096745 | downregulated during regeneration - mid |
| ENSDART0000078226 | mtnr1bb          | 0.021380755 | -0.285812097  | -0.289316068 | -0.599481549 | -0.276891324 | downregulated during regeneration - mid |
| ENSDART0000078311 | zgc:154093       | 0.050880744 | -0.170397489  | -0.310689773 | -0.421136702 | -0.191616401 | downregulated during regeneration - mid |
| ENSDART0000078336 | kic3             | 0.011790336 | -0.15725421   | -0.267140148 | -0.672772286 | -0.331888789 | downregulated during regeneration - mid |
| ENSDART0000078838 | rab3aa           | 0.031838485 | -0.225658115  | -0.303506805 | -0.374028659 | -0.138563861 | downregulated during regeneration - mid |
| ENSDART0000078908 | usp1             | 0.022814815 | -0.163356677  | -0.229514103 | -0.329514373 | -0.251997637 | downregulated during regeneration - mid |
| ENSDART0000079104 | ndufs6           | 0.003180081 | -0.146008815  | -0.377028896 | -0.443194118 | -0.327081615 | downregulated during regeneration - mid |
| ENSDART0000079629 | ppm1nb           | 0.004971122 | -0.27926594   | -0.345062767 | -0.462173038 | -0.171806172 | downregulated during regeneration - mid |
| ENSDART0000079686 | zmp:000001103    | 0.006141198 | 0.143973249   | -0.889323937 | -0.759747318 | -0.487193938 | downregulated during regeneration - mid |
| ENSDART0000079810 | si:dkey-222b8.4  | 0.001538399 | 0.076664011   | -0.231174428 | -0.530241167 | -0.088965105 | downregulated during regeneration - mid |
| ENSDART0000079866 | slc30a9          | 0.045584509 | -0.061810697  | -0.211371943 | -0.307919743 | -0.172076689 | downregulated during regeneration - mid |
| ENSDART0000080389 | fam13a           | 0.004095858 | 0.342651645   | -0.065971229 | -0.119440295 | 0.116639155  | downregulated during regeneration - mid |
| ENSDART0000081214 | set1a            | 0.041966249 | -0.31898529   | -0.284714031 | -0.513594635 | -0.412445291 | downregulated during regeneration - mid |
| ENSDART0000081325 | dynll1           | 0.0066372   | -0.057380796  | -0.1118203   | -0.516198015 | -0.112248637 | downregulated during regeneration - mid |
| ENSDART0000081611 | cgnb             | 0.001086517 | -0.200219306  | -0.438466186 | -1.067503957 | -0.17391972  | downregulated during regeneration - mid |
| ENSDART0000081761 | bin1b            | 0.028778753 | -0.023096846  | -0.153451242 | -0.459181763 | -0.132136814 | downregulated during regeneration - mid |
| ENSDART0000081781 | PLEKHG3          | 0.034279564 | -0.076813883  | -0.173391418 | -0.382548311 | -0.034437681 | downregulated during regeneration - mid |
| ENSDART0000082066 | atpv0e2          | 0.002085662 | -0.268294846  | -0.377237748 | -0.604078331 | -0.39998077  | downregulated during regeneration - mid |
| ENSDART0000082523 | impa2            | 0.00795396  | -0.208830066  | -0.398914852 | -0.498863304 | -0.267214166 | downregulated during regeneration - mid |
| ENSDART0000082622 | fsd1l            | 0.03087552  | -0.046506283  | -0.340407639 | -0.41095417  | -0.201162325 | downregulated during regeneration - mid |
| ENSDART0000082937 | fscn2a           | 0.054349324 | -0.244556215  | -0.436229092 | -0.571250568 | -0.199107259 | downregulated during regeneration - mid |
| ENSDART0000084007 | TULP2            | 0.035633594 | -0.184892554  | -0.234742374 | -0.492430755 | -0.167640019 | downregulated during regeneration - mid |
| ENSDART0000084011 | cplx4a           | 0.024776472 | -0.220118176  | -0.343953082 | -0.589002173 | -0.338126511 | downregulated during regeneration - mid |
| ENSDART0000084135 | ubtd1a           | 0.002016009 | -0.22864625   | -0.383233305 | -0.947657938 | -0.688823144 | downregulated during regeneration - mid |
| ENSDART0000084353 | tbc1d10ab        | 0.051425296 | -0.174770874  | -0.349891521 | -0.619429045 | -0.244339697 | downregulated during regeneration - mid |

|                   |                   |             |              |               |              |              |                                         |
|-------------------|-------------------|-------------|--------------|---------------|--------------|--------------|-----------------------------------------|
| ENSDART0000084417 | timm17b           | 0.014386448 | -0.134748392 | -0.15578708   | -0.404232794 | -0.18557959  | downregulated during regeneration - mid |
| ENSDART0000084792 | prosc             | 0.057325828 | -0.109541047 | -0.121094609  | -0.31852643  | -0.202300262 | downregulated during regeneration - mid |
| ENSDART0000084965 | cep104            | 0.022501885 | -0.196545786 | -0.225873142  | -0.456327943 | -0.208454995 | downregulated during regeneration - mid |
| ENSDART0000085252 | pqlc3             | 0.004793697 | -0.117366098 | -0.27675705   | -0.43476147  | -0.253093536 | downregulated during regeneration - mid |
| ENSDART0000085277 | pfkmb             | 0.010085498 | 0.010653815  | -0.414332147  | -0.69351419  | -0.144457554 | downregulated during regeneration - mid |
| ENSDART0000085693 | gpm6bb            | 0.009450076 | -0.236628216 | -0.325741908  | -0.400571921 | -0.218025638 | downregulated during regeneration - mid |
| ENSDART0000085716 | mtmr10            | 0.000364305 | 0.168573884  | -0.120117023  | -0.772748173 | -0.357648365 | downregulated during regeneration - mid |
| ENSDART0000086263 | mettl7a           | 0.05857751  | -0.420009286 | -0.158826062  | -0.791334734 | -0.334080113 | downregulated during regeneration - mid |
| ENSDART0000086619 | prkca             | 0.027625402 | -0.184045571 | -0.418285198  | -0.5357326   | -0.310736719 | downregulated during regeneration - mid |
| ENSDART0000086753 | dapk2a            | 0.010335438 | 0.129419785  | -0.339935803  | -1.219284243 | -0.369104907 | downregulated during regeneration - mid |
| ENSDART0000086994 | nat15             | 0.031838485 | -0.144704703 | -0.149678764  | -0.337458722 | -0.152039739 | downregulated during regeneration - mid |
| ENSDART0000087070 | abcc5             | 0.0132651   | 0.063506972  | -0.209331316  | -0.331966374 | -0.070006315 | downregulated during regeneration - mid |
| ENSDART0000087570 | gabrb3            | 0.027218185 | -0.106002759 | -0.31933142   | -0.574890474 | -0.11105969  | downregulated during regeneration - mid |
| ENSDART0000087570 | BRSK2 (1 of many) | 0.039389579 | -0.035673495 | -0.289130617  | -0.495870531 | -0.115059951 | downregulated during regeneration - mid |
| ENSDART0000087643 | tesk2             | 0.017205213 | -0.250604524 | -0.077411225  | -0.349635246 | -0.097357509 | downregulated during regeneration - mid |
| ENSDART0000088027 | ssx2ipb           | 0.061068477 | -0.254273665 | -0.300537366  | -0.659689526 | -0.365610708 | downregulated during regeneration - mid |
| ENSDART0000088042 | kcnh4b            | 0.028142339 | -0.293363139 | -0.305961812  | -0.46205676  | -0.207459851 | downregulated during regeneration - mid |
| ENSDART0000089161 | CCDC181           | 0.032175544 | -0.238708752 | -0.276570098  | -0.364394143 | -0.212879757 | downregulated during regeneration - mid |
| ENSDART0000089526 | otc               | 0.028981739 | -0.228950714 | -0.50691522   | -0.941930968 | -0.587900491 | downregulated during regeneration - mid |
| ENSDART0000090079 | symn              | 0.001644836 | -0.113622285 | -0.399027729  | -0.70355851  | -0.251171145 | downregulated during regeneration - mid |
| ENSDART0000090484 | tecp1a            | 0.027062614 | -0.079583722 | -0.244227266  | -0.30265493  | -0.135390116 | downregulated during regeneration - mid |
| ENSDART0000090611 | sh3g12a           | 0.003738261 | -0.3620314   | -0.426828792  | -0.627861098 | -0.256916064 | downregulated during regeneration - mid |
| ENSDART0000091183 | erfl3             | 0.034693937 | -0.064022984 | -0.222171088  | -0.380622737 | -0.084018803 | downregulated during regeneration - mid |
| ENSDART0000091452 | TULP2             | 0.003694199 | -0.183522523 | -0.233522919  | -0.588056807 | -0.14814607  | downregulated during regeneration - mid |
| ENSDART0000091615 | iffo1a            | 0.045036938 | -0.255558776 | -0.319129649  | -0.402938235 | -0.1114809   | downregulated during regeneration - mid |
| ENSDART0000091620 | atp8a1            | 0.025084869 | -0.02813322  | -0.262306637  | -0.342910163 | -0.163047911 | downregulated during regeneration - mid |
| ENSDART0000091707 | dbpa              | 0.017575469 | -0.158262702 | -0.327851995  | -0.357551076 | -0.129469939 | downregulated during regeneration - mid |
| ENSDART0000091729 | mlc1              | 0.000239262 | -0.413445193 | -0.441446959  | -0.597560289 | -0.400243567 | downregulated during regeneration - mid |
| ENSDART0000092114 | ERBB4 (1 of many) | 0.013394015 | -0.124937285 | -0.553537291  | -0.521885412 | -0.338309306 | downregulated during regeneration - mid |
| ENSDART0000092416 | rabl2             | 0.018433591 | -0.237808365 | -0.2350858742 | -0.360133928 | -0.144079351 | downregulated during regeneration - mid |
| ENSDART0000093093 | coro2bb           | 0.051450895 | -0.315281988 | -0.251087256  | -0.471013192 | -0.151819548 | downregulated during regeneration - mid |
| ENSDART0000093331 | rreb1a            | 0.018126285 | -0.024901133 | -0.155149005  | -0.517234878 | -0.050769944 | downregulated during regeneration - mid |
| ENSDART0000093738 | napaa             | 0.005374512 | -0.21867082  | -0.198889828  | -0.441263528 | -0.268359175 | downregulated during regeneration - mid |
| ENSDART0000097466 | fam169aa          | 0.080339729 | -0.25560307  | -0.389662586  | -0.539552997 | -0.303655    | downregulated during regeneration - mid |
| ENSDART0000098263 | kctd9a            | 0.018790846 | -0.029411295 | -0.237424393  | -0.359070767 | -0.190010537 | downregulated during regeneration - mid |
| ENSDART0000098648 | gc2               | 0.024271936 | -0.195652835 | -0.378422178  | -0.402398473 | -0.153861921 | downregulated during regeneration - mid |
| ENSDART0000099180 | elovl8a           | 0.019558454 | -0.351208319 | -0.254455279  | -0.702580214 | -0.196165774 | downregulated during regeneration - mid |
| ENSDART0000099244 | CDHR2             | 0.017384242 | -0.127835174 | -0.277679177  | -0.519160965 | -0.069385603 | downregulated during regeneration - mid |
| ENSDART0000099392 | irgq2             | 0.055536456 | -0.080759981 | -0.21229475   | -0.382096269 | -0.042741954 | downregulated during regeneration - mid |
| ENSDART0000100131 | si:ch211-242e8.1  | 0.00099671  | 0.043404066  | -0.450710823  | -0.466087638 | 0.073034701  | downregulated during regeneration - mid |
| ENSDART0000100194 | msi2b             | 0.036147745 | -0.174290948 | -0.286012891  | -0.448717518 | -0.171818835 | downregulated during regeneration - mid |
| ENSDART0000100287 | grk7a             | 0.01613952  | -0.29429259  | -0.34179807   | -0.766271921 | -0.26689268  | downregulated during regeneration - mid |
| ENSDART0000100667 | skia              | 0.021156666 | -0.180939747 | -0.108825609  | -0.328725059 | -0.076853639 | downregulated during regeneration - mid |
| ENSDART0000100762 | inpp4ab           | 0.000398071 | -0.155677368 | -0.41981961   | -0.539565797 | -0.358079101 | downregulated during regeneration - mid |
| ENSDART0000100869 | ppp3r1b           | 0.04032679  | -0.102347685 | -0.214447853  | -0.31663745  | -0.211814655 | downregulated during regeneration - mid |
| ENSDART0000100885 | nrn11a            | 0.001326538 | -0.520024314 | -0.30927413   | -0.690569972 | -0.461401545 | downregulated during regeneration - mid |
| ENSDART0000101576 | tmem230b          | 0.009263143 | 0.001436175  | -0.176978383  | -0.445323711 | -0.253116022 | downregulated during regeneration - mid |
| ENSDART0000102898 | zgc:158258        | 0.013286981 | -0.205000336 | -0.263168834  | -0.54350319  | -0.257007642 | downregulated during regeneration - mid |
| ENSDART0000102969 | spock3            | 0.026589151 | -0.0552216   | -0.214726057  | -0.592493725 | -0.285702337 | downregulated during regeneration - mid |
| ENSDART0000103070 | cdk17             | 0.006385907 | 0.018864851  | -0.23502559   | -0.366641807 | -0.137520544 | downregulated during regeneration - mid |
| ENSDART0000103267 | fam212ab          | 0.059492509 | -0.276107898 | -0.473876533  | -0.614056911 | -0.421775209 | downregulated during regeneration - mid |
| ENSDART0000103293 | ndufa5            | 0.014686352 | -0.136898371 | -0.38263765   | -0.527827076 | -0.351287298 | downregulated during regeneration - mid |
| ENSDART0000103450 | lactbl1b          | 0.002609113 | -0.310148031 | -0.346227281  | -0.611014657 | -0.245438949 | downregulated during regeneration - mid |
| ENSDART0000103487 | zgc:195001        | 0.006385907 | -0.335765581 | -0.344851478  | -0.707965666 | -0.31393888  | downregulated during regeneration - mid |
| ENSDART0000103628 | btdb6a            | 0.003515537 | -0.278201553 | -0.439382236  | -0.547351526 | -0.157769223 | downregulated during regeneration - mid |
| ENSDART0000104234 | gjd2b             | 0.009000055 | -0.226334837 | -0.451484904  | -0.506629051 | -0.204050045 | downregulated during regeneration - mid |
| ENSDART0000104279 | znf516            | 0.018737197 | -0.151066862 | -0.30868422   | -0.587761132 | -0.246031248 | downregulated during regeneration - mid |
| ENSDART0000104298 | ndufb5            | 0.062748344 | -0.141095269 | -0.212773777  | -0.353488244 | -0.122828248 | downregulated during regeneration - mid |
| ENSDART0000104307 | eml1              | 0.005712911 | 0.215532654  | -0.343903678  | -0.604837308 | -0.271121591 | downregulated during regeneration - mid |
| ENSDART0000104487 | cox4i2            | 0.004567663 | 0.027176247  | -0.218042175  | -0.688187338 | -0.440124172 | downregulated during regeneration - mid |
| ENSDART0000104536 | chsy1             | 0.002085662 | 0.021777196  | -0.175630111  | -0.644756219 | -0.079001152 | downregulated during regeneration - mid |
| ENSDART0000104674 | camk1db           | 0.011089782 | -0.318172003 | -0.339895825  | -0.49572727  | -0.229789777 | downregulated during regeneration - mid |
| ENSDART0000104708 | abhd12            | 0.030797346 | -0.134054463 | -0.304895231  | -0.501902497 | -0.262631127 | downregulated during regeneration - mid |
| ENSDART0000105485 | si:dkey-7814.14   | 0.009178848 | -0.103336903 | -0.24562657   | -0.381336593 | -0.194197896 | downregulated during regeneration - mid |
| ENSDART0000105545 | arl3              | 0.035698906 | -0.028403306 | -0.158533169  | -0.38830015  | -0.193573844 | downregulated during regeneration - mid |
| ENSDART0000105561 | si:dkey-42p8.3    | 0.005648279 | -0.126414242 | -0.359710173  | -0.388006213 | -0.105772793 | downregulated during regeneration - mid |
| ENSDART0000105602 | elovl6            | 0.064667433 | -0.283618771 | -0.171237628  | -0.388002017 | -0.174233768 | downregulated during regeneration - mid |
| ENSDART0000105667 | si:dkey-121a11.3  | 0.07695913  | -0.369671493 | -0.58967553   | -0.842073302 | -0.52980672  | downregulated during regeneration - mid |
| ENSDART0000105681 | cdc14ab           | 0.008133889 | -0.104501507 | -0.239167071  | -0.39502699  | -0.259112662 | downregulated during regeneration - mid |
| ENSDART0000105974 | pvalb9            | 0.005388807 | -0.398960737 | -0.428084025  | -0.618672138 | -0.278532192 | downregulated during regeneration - mid |
| ENSDART0000108943 | shroom2a          | 0.0263983   | 0.03299057   | -0.127271939  | -0.499446332 | -0.229050052 | downregulated during regeneration - mid |
| ENSDART0000108989 | adamts14          | 0.018280387 | -0.185318243 | -0.40325002   | -0.417840329 | -0.182643804 | downregulated during regeneration - mid |
| ENSDART0000109023 | fmln3             | 0.0083599   | -0.186687955 | -0.312847961  | -0.533074314 | -0.280720309 | downregulated during regeneration - mid |
| ENSDART0000109037 | cdk5r2b           | 0.061835261 | -0.48847507  | -0.44246865   | -0.592226601 | -0.418268347 | downregulated during regeneration - mid |
| ENSDART0000109314 | arhgap10          | 0.008289796 | -0.214061464 | -0.171864796  | -0.398074347 | -0.037252057 | downregulated during regeneration - mid |

|                    |                   |             |              |              |              |              |                                         |
|--------------------|-------------------|-------------|--------------|--------------|--------------|--------------|-----------------------------------------|
| ENSDART00000109440 | adamts9           | 0.042577687 | -0.162680626 | -0.21784206  | -0.326391297 | -0.145144869 | downregulated during regeneration - mid |
| ENSDART00000109485 | gal3st3           | 0.008289796 | -0.139388785 | -0.282505485 | -0.388230748 | -0.163229068 | downregulated during regeneration - mid |
| ENSDART00000109567 | nhsa              | 0.005353377 | -0.05015222  | -0.331046598 | -0.348641258 | -0.190382203 | downregulated during regeneration - mid |
| ENSDART00000109570 | NA                | 0.009680262 | -0.315520739 | -0.355339215 | -1.137398742 | -0.355379016 | downregulated during regeneration - mid |
| ENSDART00000109604 | palmdb            | 0.002896578 | -0.228743892 | -0.477529612 | -0.779896236 | -0.307691368 | downregulated during regeneration - mid |
| ENSDART00000109876 | sun1              | 0.020586406 | -0.255190881 | -0.339472925 | -0.466317308 | -0.169389668 | downregulated during regeneration - mid |
| ENSDART00000110033 | abh8db            | 0.063929589 | -0.069420963 | -0.144372686 | -0.35601389  | -0.098305508 | downregulated during regeneration - mid |
| ENSDART00000110041 | lrrc38a           | 0.006744186 | -0.167375954 | -0.314913504 | -0.608219505 | -0.293673506 | downregulated during regeneration - mid |
| ENSDART00000110431 | si:ch73-280o22.2  | 0.030699866 | -0.128270202 | -0.267395445 | -0.366965125 | -0.13375727  | downregulated during regeneration - mid |
| ENSDART00000110571 | fam150a           | 0.015571917 | -0.089437558 | -0.463371816 | -0.643350488 | -0.328581938 | downregulated during regeneration - mid |
| ENSDART00000110606 | abhd16a           | 0.001679054 | 0.034068276  | -0.290276411 | -0.385494504 | -0.249441823 | downregulated during regeneration - mid |
| ENSDART00000111021 | si:dkeyp-14d3.1   | 0.005053949 | -0.147889699 | -0.589075251 | -0.655456899 | -0.257575305 | downregulated during regeneration - mid |
| ENSDART00000111271 | CAB201080074.2    | 0.007536007 | 0.091182245  | -0.411348285 | -0.551440399 | -0.297376381 | downregulated during regeneration - mid |
| ENSDART00000111343 | lmf2a             | 0.022218278 | -0.264313993 | -0.256081583 | -0.425329386 | -0.228346273 | downregulated during regeneration - mid |
| ENSDART00000111536 | rmdn2             | 0.042891    | -0.153020266 | -0.402861584 | -0.346146607 | -0.222410217 | downregulated during regeneration - mid |
| ENSDART00000111625 | ninl              | 0.004129329 | -0.236310585 | -0.326810382 | -0.437556672 | -0.154099243 | downregulated during regeneration - mid |
| ENSDART00000111666 | npcd1a            | 0.037722848 | -0.090316249 | -0.266587539 | -0.30135563  | -0.100212297 | downregulated during regeneration - mid |
| ENSDART00000111717 | fscn2b            | 0.015420308 | -0.120313044 | -0.274854028 | -0.483029563 | -0.127989104 | downregulated during regeneration - mid |
| ENSDART00000111993 | si:dkey-19b23.15  | 0.001555418 | -0.211537347 | -0.357802737 | -0.511679441 | -0.364770311 | downregulated during regeneration - mid |
| ENSDART00000112156 | si:ch211-253b8.5  | 0.014985328 | -0.087783514 | -0.192500909 | -0.49330541  | -0.306875488 | downregulated during regeneration - mid |
| ENSDART00000112768 | ubald1a           | 0.0312149   | -0.163342676 | -0.260286427 | -0.366999537 | -0.147535942 | downregulated during regeneration - mid |
| ENSDART00000112967 | rilp              | 0.001611738 | -0.073950343 | -0.174960248 | -0.511756745 | -0.145692497 | downregulated during regeneration - mid |
| ENSDART00000113089 | slc4a11           | 0.060667717 | -0.230777933 | -0.44932083  | -0.596234565 | -0.271629672 | downregulated during regeneration - mid |
| ENSDART00000113362 | ip6k1             | 0.017686321 | -0.059673843 | -0.326658711 | -0.456047384 | -0.047258149 | downregulated during regeneration - mid |
| ENSDART00000113376 | fam13b            | 0.00601663  | -0.247096499 | -0.341873515 | -0.575011995 | -0.179280023 | downregulated during regeneration - mid |
| ENSDART00000113384 | lyrm4             | 0.026927975 | -0.082514668 | -0.167513155 | -0.434528553 | -0.231621665 | downregulated during regeneration - mid |
| ENSDART00000113649 | impj1a            | 0.03238504  | -0.10562067  | -0.311339049 | -0.59002435  | -0.135488682 | downregulated during regeneration - mid |
| ENSDART00000113799 | si:ch211-132b12.7 | 0.001099064 | 0.091573373  | -0.269264305 | -0.847675231 | -0.371595689 | downregulated during regeneration - mid |
| ENSDART00000113853 | prokr1a           | 0.062959243 | -0.220461946 | -0.109814734 | -0.59922392  | -0.17974305  | downregulated during regeneration - mid |
| ENSDART00000113912 | ntm               | 0.012936971 | -0.178976918 | -0.363265579 | -0.513893339 | -0.211182567 | downregulated during regeneration - mid |
| ENSDART00000114118 | CU639468.1        | 0.004971122 | -0.073130118 | -0.36036163  | -0.387238652 | -0.163804242 | downregulated during regeneration - mid |
| ENSDART00000114134 | wrb               | 0.049748908 | -0.123951898 | -0.095408141 | -0.313002762 | -0.1622087   | downregulated during regeneration - mid |
| ENSDART00000114172 | pde6d             | 0.006969648 | -0.201449776 | -0.351770435 | -0.511138243 | -0.216254622 | downregulated during regeneration - mid |
| ENSDART00000114182 | fyco1b            | 0.017131781 | 0.10137681   | -0.156409007 | -0.465781329 | -0.01243848  | downregulated during regeneration - mid |
| ENSDART00000114533 | mn1a              | 0.064969544 | -0.109536494 | -0.207833595 | -0.685216226 | -0.20481073  | downregulated during regeneration - mid |
| ENSDART00000114705 | gprc5bb           | 0.016311478 | -0.132340316 | -0.338695197 | -0.459834622 | -0.091865364 | downregulated during regeneration - mid |
| ENSDART00000114719 | frmpd1a           | 0.0134351   | -0.29565145  | -0.338039747 | -0.498795038 | -0.059125706 | downregulated during regeneration - mid |
| ENSDART00000114746 | lrrc58a           | 0.018924903 | -0.133537399 | 0.014548786  | -0.622798481 | -0.259773873 | downregulated during regeneration - mid |
| ENSDART00000115221 | adat2             | 0.007676315 | 0.066031062  | -1.495132242 | -2.125701316 | -0.144340549 | downregulated during regeneration - mid |
| ENSDART00000115224 | pvr1a             | 0.012357429 | -0.001527    | -0.239159739 | -0.512986688 | -0.121351808 | downregulated during regeneration - mid |
| ENSDART00000115343 | atp8b4            | 0.007152296 | -0.126263785 | -0.363733117 | -0.385610912 | -0.00148052  | downregulated during regeneration - mid |
| ENSDART00000115370 | mettl22           | 0.044172739 | -0.250044414 | -0.320129908 | -0.572576042 | -0.437533988 | downregulated during regeneration - mid |
| ENSDART00000121545 | brms1             | 0.048520479 | -0.198338884 | -0.120854433 | -0.325603911 | -0.103470514 | downregulated during regeneration - mid |
| ENSDART00000121598 | phf10             | 0.052326315 | -0.237213765 | -0.309795055 | -0.326418269 | -0.213703564 | downregulated during regeneration - mid |
| ENSDART00000121952 | h2afy2            | 0.039334382 | -0.217094069 | -0.401231455 | -0.429907398 | -0.128476741 | downregulated during regeneration - mid |
| ENSDART00000122059 | scoca             | 0.051450895 | -0.009226259 | -0.04540809  | -0.349436614 | -0.115738429 | downregulated during regeneration - mid |
| ENSDART00000122716 | PDE1C             | 0.014686352 | -0.224024171 | -0.483764938 | -0.500061121 | -0.40054702  | downregulated during regeneration - mid |
| ENSDART00000122929 | bb54              | 0.023936488 | -0.14534471  | -0.308002271 | -0.496501405 | -0.252523436 | downregulated during regeneration - mid |
| ENSDART00000123040 | pfkfb             | 0.018655612 | -0.26169465  | -0.241526904 | -0.415842652 | -0.206785479 | downregulated during regeneration - mid |
| ENSDART00000123360 | susd5             | 0.005867979 | -0.191753051 | -0.73208098  | -0.853142314 | -0.526763596 | downregulated during regeneration - mid |
| ENSDART00000123450 | KCNB2 (1 of many) | 0.014634638 | -0.271043423 | -0.632402343 | -0.828557597 | -0.168958818 | downregulated during regeneration - mid |
| ENSDART00000123505 | rab11fip4a        | 0.004897476 | -0.154164113 | -0.404988879 | -0.479622862 | -0.179766383 | downregulated during regeneration - mid |
| ENSDART00000123820 | tmem135           | 0.049596963 | -0.104475369 | -0.143585965 | -0.370543783 | -0.122253976 | downregulated during regeneration - mid |
| ENSDART00000123970 | mntb              | 0.011725523 | -0.115861458 | -0.101461538 | -0.360694649 | -0.01567692  | downregulated during regeneration - mid |
| ENSDART00000124140 | zgc:101566        | 0.000727221 | -0.242404826 | -0.290163127 | -0.636219456 | -0.416307006 | downregulated during regeneration - mid |
| ENSDART00000124290 | MFN1              | 0.012467303 | -0.108610875 | -0.185612855 | -0.471855683 | -0.083062873 | downregulated during regeneration - mid |
| ENSDART00000124329 | cbx8a             | 0.01903005  | -0.13552578  | -0.23364206  | -0.31740894  | -0.19855692  | downregulated during regeneration - mid |
| ENSDART00000124335 | smim4             | 0.017820373 | -0.115055175 | -0.371982424 | -0.338416379 | -0.248500803 | downregulated during regeneration - mid |
| ENSDART00000124562 | zgc:152977        | 0.011844097 | -0.424781995 | -0.464146326 | -0.707134675 | -0.367623104 | downregulated during regeneration - mid |
| ENSDART00000124676 | sv2ba             | 0.018790846 | -0.120324523 | -0.401787287 | -0.561843381 | -0.191682717 | downregulated during regeneration - mid |
| ENSDART00000124945 | ubap1b            | 0.007333969 | 0.21207026   | -0.004652141 | -0.773302877 | -0.344881822 | downregulated during regeneration - mid |
| ENSDART00000125299 | plk2a             | 0.086996216 | -0.143584568 | -0.170521478 | -0.297471862 | -0.183865098 | downregulated during regeneration - mid |
| ENSDART00000125397 | kri1.2            | 0.069160004 | -0.318299605 | -0.278223015 | -0.439932558 | -0.332258967 | downregulated during regeneration - mid |
| ENSDART00000125466 | alpi.2            | 0.052273162 | -0.05537717  | -0.356245119 | -0.658920603 | -0.289506352 | downregulated during regeneration - mid |
| ENSDART00000125561 | atp6ap2           | 0.008210772 | -0.203601896 | -0.343976801 | -0.371684174 | -0.265876436 | downregulated during regeneration - mid |
| ENSDART00000125864 | camkk1b           | 0.039389579 | -0.169636507 | -0.512096721 | -0.591294824 | -0.14296099  | downregulated during regeneration - mid |
| ENSDART00000125979 | tshz3a            | 0.02052819  | -0.321412605 | -0.323547538 | -0.394821529 | -0.291421679 | downregulated during regeneration - mid |
| ENSDART00000126076 | NA                | 0.012675019 | -0.016912473 | -0.350302068 | -0.401962349 | -0.001679825 | downregulated during regeneration - mid |
| ENSDART00000126084 | ctdSpl3           | 0.009272964 | -0.310396194 | -0.278185547 | -0.40879197  | -0.234117517 | downregulated during regeneration - mid |
| ENSDART00000126282 | nr1d1             | 0.008088213 | -0.1014969   | -0.191656676 | -0.494430716 | -0.13667305  | downregulated during regeneration - mid |
| ENSDART00000126661 | rhobtb1           | 0.007785924 | -0.165202139 | -0.331565823 | -0.522361525 | -0.299461153 | downregulated during regeneration - mid |
| ENSDART00000126842 | flj11011          | 0.051190638 | -0.120546184 | -0.161649138 | -0.295902143 | -0.182318736 | downregulated during regeneration - mid |
| ENSDART00000126916 | mob2b             | 0.004538993 | 0.26836075   | -0.004670217 | -0.398977994 | -0.072830738 | downregulated during regeneration - mid |
| ENSDART00000126928 | si:dkey-73n8.3    | 0.012465298 | -0.354837143 | 0.244926012  | -3.843926683 | -0.176933271 | downregulated during regeneration - mid |
| ENSDART00000127131 | mtmr10            | 0.016195506 | 0.05904867   | -0.240178    | -0.607174209 | -0.120957306 | downregulated during regeneration - mid |



|                    |                   |             |              |              |              |              |                                         |
|--------------------|-------------------|-------------|--------------|--------------|--------------|--------------|-----------------------------------------|
| ENSDART00000127216 | fam161a           | 0.056105466 | -0.082566753 | -0.243407902 | -0.44855597  | -0.155296925 | downregulated during regeneration - mid |
| ENSDART00000127274 | sema7a            | 0.056867894 | -0.198678021 | -0.353988759 | -0.478218296 | -0.427230313 | downregulated during regeneration - mid |
| ENSDART00000127331 | cdc37l1           | 0.022102317 | -0.115815783 | -0.102908381 | -0.388723888 | -0.245749713 | downregulated during regeneration - mid |
| ENSDART00000127398 | CR753886.1        | 0.031973637 | -0.159141993 | -0.332294072 | -0.331878243 | -0.244595408 | downregulated during regeneration - mid |
| ENSDART00000127568 | ankha             | 0.014386448 | -0.068226585 | -0.359480026 | -0.686453521 | -0.222767571 | downregulated during regeneration - mid |
| ENSDART00000127656 | cln6b             | 0.003337702 | -0.363769389 | -0.208045101 | -0.481848131 | -0.19203643  | downregulated during regeneration - mid |
| ENSDART00000128696 | CAB201035108.1    | 0.038217845 | -0.30766878  | -0.382099096 | -0.769557831 | -0.298631085 | downregulated during regeneration - mid |
| ENSDART00000128698 | rnf34b            | 0.019215781 | -0.122706526 | -0.390373676 | -0.658840165 | -0.257572429 | downregulated during regeneration - mid |
| ENSDART00000128721 | rcvrn3            | 0.023143967 | -0.045382046 | -0.143627209 | -0.579607896 | -0.393091134 | downregulated during regeneration - mid |
| ENSDART00000128722 | RGS9BP            | 0.039271588 | -0.328845343 | -0.481472863 | -0.560905879 | -0.19840165  | downregulated during regeneration - mid |
| ENSDART00000128859 | prlra             | 0.029917459 | -0.153277376 | -0.232075961 | -0.477332275 | -0.11182176  | downregulated during regeneration - mid |
| ENSDART00000128975 | slc25a32a         | 0.003209414 | 0.048183005  | -0.130483176 | -0.493409396 | -0.216291506 | downregulated during regeneration - mid |
| ENSDART00000129156 | adcyr7            | 0.012672965 | -0.081832737 | -0.232314587 | -0.506962474 | -0.282923342 | downregulated during regeneration - mid |
| ENSDART00000129308 | ACVR1C            | 0.02188897  | -0.083617591 | -0.230914728 | -0.630759756 | -0.255735924 | downregulated during regeneration - mid |
| ENSDART00000129751 | si:ch211-105f12.2 | 0.063999698 | -0.375204291 | -0.254543259 | -0.612224773 | -0.289815804 | downregulated during regeneration - mid |
| ENSDART00000130093 | c10h2lorf59       | 0.010893084 | -0.163395921 | -0.484168269 | -0.87971069  | -0.649928123 | downregulated during regeneration - mid |
| ENSDART00000130142 | ube2w             | 0.018144005 | 0.018587872  | -0.041621436 | -0.37919808  | -0.07627037  | downregulated during regeneration - mid |
| ENSDART00000130366 | si:dkey-21c1.4    | 0.040026502 | -0.116466944 | -0.239339578 | -0.392905857 | -0.311667635 | downregulated during regeneration - mid |
| ENSDART00000130537 | spag1a            | 0.016180105 | -0.063362594 | -0.300759627 | -0.420912866 | -0.152669564 | downregulated during regeneration - mid |
| ENSDART00000130818 | ptpr1b            | 0.007396212 | -0.275892935 | -0.352115142 | -0.541325565 | -0.202924453 | downregulated during regeneration - mid |
| ENSDART00000131206 | 431b60            | 0.02794941  | -0.087431315 | -0.336892252 | -0.48450384  | -0.18585378  | downregulated during regeneration - mid |
| ENSDART00000131286 | erlin2            | 0.045086702 | -0.00462383  | -0.183644452 | -0.434826094 | -0.105981059 | downregulated during regeneration - mid |
| ENSDART00000131349 | mob2b             | 0.003887497 | 0.337219743  | -0.092777728 | -0.774689204 | -0.397735432 | downregulated during regeneration - mid |
| ENSDART00000131517 | si:ch211-232m10.6 | 0.039816981 | -0.306074293 | -0.295884968 | -0.441790198 | -0.281067097 | downregulated during regeneration - mid |
| ENSDART00000131627 | kcnk3             | 0.030198325 | -0.085165392 | -0.23467025  | -0.387311243 | -0.108636046 | downregulated during regeneration - mid |
| ENSDART00000131848 | BX004774.2        | 0.004739684 | 0.065629354  | -0.435237015 | -1.040450944 | -0.818745042 | downregulated during regeneration - mid |
| ENSDART00000131973 | lrmp              | 0.011245854 | -0.070199137 | -0.469517154 | -1.098854311 | -0.136597848 | downregulated during regeneration - mid |
| ENSDART00000132591 | si:ch211-191f18.4 | 0.016122246 | 0.099974449  | -0.068457558 | -0.479286849 | -0.192940747 | downregulated during regeneration - mid |
| ENSDART00000132744 | ppcdc             | 0.004289396 | 0.019198695  | -0.177358944 | -0.471740583 | -0.31681582  | downregulated during regeneration - mid |
| ENSDART00000133035 | syta5a            | 0.045873551 | -0.188232763 | -0.271065673 | -0.434073976 | -0.186984299 | downregulated during regeneration - mid |
| ENSDART00000133039 | tac3a             | 0.010923556 | -0.2410584   | -0.489343566 | -0.63037654  | -0.413025711 | downregulated during regeneration - mid |
| ENSDART00000133220 | CR788254.2        | 0.033633212 | -0.013907422 | -0.231082485 | -0.739605077 | -0.487191429 | downregulated during regeneration - mid |
| ENSDART00000133242 | syne2b            | 0.0092524   | 0.14436825   | -0.456480635 | -0.844135801 | -0.206154738 | downregulated during regeneration - mid |
| ENSDART00000133583 | si:ch211-117m20.4 | 0.037722848 | -0.073043862 | -0.13648785  | -0.437013406 | -0.146443055 | downregulated during regeneration - mid |
| ENSDART00000133613 | AL954694.1        | 0.044914837 | -0.189304139 | -0.336191594 | -0.52116431  | -0.341767633 | downregulated during regeneration - mid |
| ENSDART00000133661 | tasp1             | 0.035967167 | -0.129454637 | -0.177592146 | -0.299309238 | -0.129141605 | downregulated during regeneration - mid |
| ENSDART00000133867 | arfp2a            | 0.037668797 | -0.237325336 | -0.320204428 | -0.424850477 | -0.153128941 | downregulated during regeneration - mid |
| ENSDART00000133869 | kcnk1a            | 0.066233336 | -0.389144165 | -0.38978007  | -0.667699511 | -0.286776021 | downregulated during regeneration - mid |
| ENSDART00000134190 | sort1b            | 0.011533823 | -0.233086943 | -0.116629656 | -0.586941063 | -0.191255985 | downregulated during regeneration - mid |
| ENSDART00000134399 | silk              | 0.002060335 | -0.338857379 | -0.632619838 | -0.770465733 | -0.089077643 | downregulated during regeneration - mid |
| ENSDART00000134697 | pik3ip1           | 0.001209453 | -0.252912627 | -0.195771257 | -0.573002676 | -0.212029641 | downregulated during regeneration - mid |
| ENSDART00000134773 | zifand5a          | 0.01494686  | -0.170709233 | -0.221425066 | -0.980962271 | -0.517481995 | downregulated during regeneration - mid |
| ENSDART00000134864 | gigyf1b           | 0.0256797   | -0.032906085 | -0.141419247 | -0.36943011  | -0.170431533 | downregulated during regeneration - mid |
| ENSDART00000135118 | efr3ba            | 0.060997845 | -0.168363836 | -0.303586815 | -0.356914459 | -0.264543553 | downregulated during regeneration - mid |
| ENSDART00000135118 | ptpn21            | 0.062431525 | -0.060719081 | -0.163907746 | -0.321158981 | -0.096688843 | downregulated during regeneration - mid |
| ENSDART00000135436 | jtb               | 0.036479303 | -0.083914092 | -0.13827795  | -0.410566521 | -0.208466854 | downregulated during regeneration - mid |
| ENSDART00000135479 | fstl5             | 0.046057741 | -0.187703631 | -0.312045142 | -0.413295205 | -0.11029682  | downregulated during regeneration - mid |
| ENSDART00000135510 | syne2b            | 0.002913561 | -0.011968335 | -0.473630435 | -0.918119469 | -0.289310189 | downregulated during regeneration - mid |
| ENSDART00000135690 | lactbl1a          | 0.016724084 | -0.207828355 | -0.397072585 | -0.513557165 | -0.348206521 | downregulated during regeneration - mid |
| ENSDART00000135738 | zgc:194990        | 0.007620644 | 0.067005172  | -0.387370648 | -0.731552205 | -0.192679748 | downregulated during regeneration - mid |
| ENSDART00000135860 | rnf41l            | 0.023081255 | -0.353446179 | -0.473576771 | -0.616364395 | -0.289592085 | downregulated during regeneration - mid |
| ENSDART00000135919 | amd1              | 0.013040781 | -0.131714213 | -0.276160556 | -0.537901531 | -0.163925689 | downregulated during regeneration - mid |
| ENSDART00000136208 | ncam1b            | 0.026842776 | -0.292790209 | -0.308372802 | -0.421218735 | -0.19466435  | downregulated during regeneration - mid |
| ENSDART00000136647 | ext1c             | 0.014963248 | -0.283149695 | -0.275883116 | -0.465218527 | -0.113484828 | downregulated during regeneration - mid |
| ENSDART00000136770 | si:dkey-246e1.3   | 0.017642395 | -0.264481758 | -0.308595158 | -0.554881445 | -0.406535962 | downregulated during regeneration - mid |
| ENSDART00000136771 | dnajc5ga          | 0.026478876 | -0.246041931 | -0.267357646 | -0.352933326 | -0.221144382 | downregulated during regeneration - mid |
| ENSDART00000137047 | scoca             | 0.043980855 | -0.178388629 | -0.216665672 | -0.49140437  | -0.218641566 | downregulated during regeneration - mid |
| ENSDART00000137185 | cnga3b            | 0.013354221 | -0.145832564 | -0.301563517 | -1.136000666 | -0.708190865 | downregulated during regeneration - mid |
| ENSDART00000137236 | hpcal1            | 0.014842483 | -0.065446201 | -0.487196869 | -0.639863396 | -0.431847778 | downregulated during regeneration - mid |
| ENSDART00000137292 | tmem106bb         | 0.004741095 | -0.265825137 | -0.29210537  | -0.411370487 | -0.25270276  | downregulated during regeneration - mid |
| ENSDART00000137364 | si:dkey-33c12.3   | 0.0001406   | 0.174067673  | -0.534549963 | -0.496919129 | 0.189169246  | downregulated during regeneration - mid |
| ENSDART00000137633 | si:ch211-194e15.5 | 0.009667225 | -0.00297372  | -0.215384681 | -0.930894546 | -0.593142383 | downregulated during regeneration - mid |
| ENSDART00000137817 | rap1gap2a         | 0.029185454 | -0.351211604 | -0.330279371 | -0.569882036 | -0.258477103 | downregulated during regeneration - mid |
| ENSDART00000137896 | fibbp             | 0.035286858 | -0.042394017 | -0.144008268 | -0.458312875 | -0.18906893  | downregulated during regeneration - mid |
| ENSDART00000137899 | tmem9             | 0.056822582 | -0.365732748 | -0.460492017 | -0.592427521 | -0.282793654 | downregulated during regeneration - mid |
| ENSDART00000138232 | arl13a            | 0.018790846 | -0.123428499 | -0.297389057 | -0.827109894 | -0.393133456 | downregulated during regeneration - mid |
| ENSDART00000138270 | copz2             | 0.022463985 | -0.133761169 | -0.127273242 | -0.35316272  | -0.169760508 | downregulated during regeneration - mid |
| ENSDART00000138541 | rggrip1           | 0.043421442 | -0.096214383 | -0.271667846 | -0.617065899 | -0.286110235 | downregulated during regeneration - mid |
| ENSDART00000138658 | si:ch211-117m20.4 | 0.082561098 | -0.301116828 | -0.255854166 | -0.65213458  | -0.329202684 | downregulated during regeneration - mid |
| ENSDART00000138793 | si:ch211-203k16.3 | 0.033480582 | -0.114803625 | -0.341143223 | -0.894722004 | -0.064858026 | downregulated during regeneration - mid |
| ENSDART00000138866 | pbxip1a           | 0.000760227 | -0.45481847  | -0.358362517 | -0.587330976 | -0.331438505 | downregulated during regeneration - mid |
| ENSDART00000138922 | elovl8a           | 0.097148471 | -0.299886352 | -0.255106336 | -0.59316691  | -0.339691401 | downregulated during regeneration - mid |
| ENSDART00000139042 | si:ch211-132b12.7 | 0.002274284 | 0.072730857  | -0.322841214 | -0.765244522 | -0.309126323 | downregulated during regeneration - mid |
| ENSDART00000139102 | dbpb              | 0.001993937 | 0.113164671  | -0.364559303 | -0.423196921 | -0.137052116 | downregulated during regeneration - mid |
| ENSDART00000139310 | bcat2             | 0.032825581 | -0.180902608 | -0.445596686 | -0.579108461 | -0.343900677 | downregulated during regeneration - mid |



|                    |                    |             |              |              |              |              |                                         |
|--------------------|--------------------|-------------|--------------|--------------|--------------|--------------|-----------------------------------------|
| ENSDART00000139461 | spock3             | 0.043085704 | -0.122253969 | -0.220033244 | -0.389207603 | -0.090203867 | downregulated during regeneration - mid |
| ENSDART00000139477 | trim110            | 0.030645263 | -0.21821102  | -0.289321848 | -0.373728133 | -0.159590708 | downregulated during regeneration - mid |
| ENSDART00000139715 | dpm3               | 0.028357685 | -0.11194386  | -0.125527265 | -0.41579896  | -0.188378465 | downregulated during regeneration - mid |
| ENSDART00000139900 | diaph3             | 0.028408144 | 0.052388836  | -0.258521684 | -0.529199016 | -0.186043701 | downregulated during regeneration - mid |
| ENSDART00000140145 | ajap1              | 0.019585067 | -0.237572949 | -0.464416488 | -0.62912768  | -0.262821389 | downregulated during regeneration - mid |
| ENSDART00000140375 | zfyve27            | 0.02776376  | -0.214217108 | -0.191210439 | -0.353015645 | -0.21311838  | downregulated during regeneration - mid |
| ENSDART00000140553 | frmpd1a            | 0.012556905 | -0.279082186 | -0.31970424  | -0.46726564  | -0.019879501 | downregulated during regeneration - mid |
| ENSDART00000141031 | BX004774.2         | 0.016675166 | -0.096197487 | -0.455215086 | -0.947274727 | -0.721728098 | downregulated during regeneration - mid |
| ENSDART00000141157 | abl1m3             | 0.029525765 | -0.090063728 | -0.09247413  | -0.384522771 | 0.048083962  | downregulated during regeneration - mid |
| ENSDART00000141340 | si:dkey-183n20.15  | 0.02850112  | -0.434296772 | -0.549401302 | -1.33032419  | -0.748989345 | downregulated during regeneration - mid |
| ENSDART00000141493 | ANO2 (1 of many)   | 0.006900346 | 0.056182997  | -0.29662332  | -0.7863422   | -0.307272737 | downregulated during regeneration - mid |
| ENSDART00000141734 | hivep2a            | 0.017814842 | -0.218148846 | -0.337091836 | -0.481607769 | -0.327040294 | downregulated during regeneration - mid |
| ENSDART00000142157 | arl15a             | 0.011135896 | -0.037401347 | -0.185890543 | -0.49114445  | -0.348659966 | downregulated during regeneration - mid |
| ENSDART00000142454 | si:dkey-121a11.3   | 0.046134939 | -0.218109071 | -0.329830559 | -0.334040533 | -0.225452629 | downregulated during regeneration - mid |
| ENSDART00000142543 | si:dkey-206f10.1   | 0.009178848 | -0.205833854 | -0.070068511 | -0.826534181 | -0.287245824 | downregulated during regeneration - mid |
| ENSDART00000142605 | sorbs2b            | 0.003262292 | -0.090898219 | -0.353328393 | -0.576838002 | -0.278787769 | downregulated during regeneration - mid |
| ENSDART00000142605 | rce1b1             | 0.030361713 | -0.103631801 | -0.326325127 | -0.391135117 | -0.061782364 | downregulated during regeneration - mid |
| ENSDART00000143165 | tsc22d1            | 0.012984014 | -0.098364585 | -0.21923408  | -0.39849137  | 0.017570634  | downregulated during regeneration - mid |
| ENSDART00000143199 | wasf3a             | 0.033862985 | -0.216537889 | -0.280788628 | -0.398676762 | -0.269991874 | downregulated during regeneration - mid |
| ENSDART00000143245 | nptnb              | 0.00231226  | -0.0813348   | -0.106325128 | -0.477835951 | -0.112902967 | downregulated during regeneration - mid |
| ENSDART00000143203 | usp21              | 0.010231208 | -0.183997919 | -0.33237745  | -0.642449016 | -0.356635014 | downregulated during regeneration - mid |
| ENSDART00000143625 | map7d2b            | 0.042433381 | 0.025364857  | -1.606530561 | -4.429840485 | -0.88152256  | downregulated during regeneration - mid |
| ENSDART00000143662 | ankrd33aa          | 0.01899428  | -0.118189532 | -0.449119978 | -0.599045615 | 0.004982045  | downregulated during regeneration - mid |
| ENSDART00000143829 | nxnl1              | 0.034874709 | -0.184554354 | -0.325799787 | -0.486032926 | -0.185522737 | downregulated during regeneration - mid |
| ENSDART00000143874 | akna               | 0.021937256 | -0.124615674 | -0.323808831 | -0.482322372 | -0.23639171  | downregulated during regeneration - mid |
| ENSDART00000144592 | sik2a              | 0.005427451 | -0.05071398  | -0.135507163 | -0.424760133 | 0.101311014  | downregulated during regeneration - mid |
| ENSDART00000144802 | dfnb31b            | 0.012605558 | -0.206535765 | -0.346317212 | -0.484783097 | -0.018383317 | downregulated during regeneration - mid |
| ENSDART00000144804 | mxa7               | 0.020724346 | -0.254910086 | -0.321688262 | -0.500299705 | -0.323281006 | downregulated during regeneration - mid |
| ENSDART00000144890 | bokb               | 0.052287778 | -0.312629523 | -0.278040732 | -0.730243904 | -0.348692502 | downregulated during regeneration - mid |
| ENSDART00000145035 | saga               | 0.025257904 | -0.094875139 | -0.251791894 | -0.561974573 | -0.363496236 | downregulated during regeneration - mid |
| ENSDART00000145258 | glsb               | 0.012086831 | -0.010345949 | -0.147193332 | -0.750348982 | -0.227873062 | downregulated during regeneration - mid |
| ENSDART00000145545 | dcl1a              | 0.028108682 | -0.21177192  | -0.314020567 | -0.407893866 | -0.042242501 | downregulated during regeneration - mid |
| ENSDART00000145728 | sdhc               | 0.056867894 | -0.035025769 | -0.113602993 | -0.325388824 | -0.192371035 | downregulated during regeneration - mid |
| ENSDART00000145834 | si:ch211-233a24.2  | 0.017986602 | -0.054480296 | -0.065552868 | -0.373189    | -0.049333125 | downregulated during regeneration - mid |
| ENSDART00000145894 | zgc:195245         | 0.033020938 | -0.325743953 | -0.471221888 | -0.661613866 | -0.246097731 | downregulated during regeneration - mid |
| ENSDART00000146008 | camkl              | 0.050814856 | -0.251523364 | -0.299024254 | -0.462517021 | -0.14005057  | downregulated during regeneration - mid |
| ENSDART00000146062 | STX3 (1 of many)   | 0.041930419 | -0.081644241 | -0.246049482 | -0.328837917 | -0.149895857 | downregulated during regeneration - mid |
| ENSDART00000147368 | osbp2              | 0.027388792 | -0.137018463 | -0.22987814  | -0.404444797 | -0.125629393 | downregulated during regeneration - mid |
| ENSDART00000147422 | arhgap23b          | 0.009929644 | -0.106264079 | -0.33507693  | -0.670558797 | -0.201207875 | downregulated during regeneration - mid |
| ENSDART00000147502 | grhprb             | 0.004106215 | 0.278026338  | -0.217638113 | -0.512645749 | -0.092734666 | downregulated during regeneration - mid |
| ENSDART00000147504 | bwz2               | 0.002177213 | 0.031120244  | -0.513458671 | -0.643056049 | -0.325765553 | downregulated during regeneration - mid |
| ENSDART00000147884 | syne2b             | 0.0066372   | 0.046598878  | -0.495566729 | -1.074400394 | -0.335549303 | downregulated during regeneration - mid |
| ENSDART00000147903 | lrit1a             | 0.028192085 | -0.179060864 | -0.15522738  | -0.479781004 | -0.346169989 | downregulated during regeneration - mid |
| ENSDART00000148039 | srx19a             | 0.037712225 | -0.086070054 | -0.238060141 | -0.431834798 | -0.166151211 | downregulated during regeneration - mid |
| ENSDART00000148066 | znf395b            | 0.020342933 | -0.110739145 | -0.366906743 | -0.428042969 | -0.183105049 | downregulated during regeneration - mid |
| ENSDART00000148106 | mef2aa             | 0.026582721 | -0.081330082 | -0.55524128  | -0.609035118 | -0.185252531 | downregulated during regeneration - mid |
| ENSDART00000148175 | si:ch1073-440b2.1  | 0.004197991 | -0.235967394 | -0.243649374 | -0.449710659 | -0.316169237 | downregulated during regeneration - mid |
| ENSDART00000148246 | pole4              | 0.028322957 | -0.080211224 | -0.333184545 | -0.567162517 | -0.350297708 | downregulated during regeneration - mid |
| ENSDART00000148353 | usf2               | 0.006964046 | -0.107987138 | -0.265954127 | -0.405201274 | -0.200197809 | downregulated during regeneration - mid |
| ENSDART00000148536 | GK3P               | 0.017775184 | -0.308304163 | -0.269790809 | -0.586409039 | -0.39358576  | downregulated during regeneration - mid |
| ENSDART00000148537 | rora               | 0.01612441  | -0.160828233 | -0.221872095 | -0.45696721  | -0.083100906 | downregulated during regeneration - mid |
| ENSDART00000148639 | ubxn2a             | 0.015578607 | -0.292754646 | -0.267419804 | -0.368360861 | -0.228619688 | downregulated during regeneration - mid |
| ENSDART00000148831 | fgf11b             | 0.048355827 | -0.269342716 | -0.341549392 | -0.474527478 | -0.280873475 | downregulated during regeneration - mid |
| ENSDART00000148958 | fam150a            | 0.006385907 | -0.081185595 | -0.392189222 | -0.650641125 | -0.329645149 | downregulated during regeneration - mid |
| ENSDART00000148982 | bin1b              | 0.017473198 | 0.009431427  | -0.214307092 | -0.49686004  | -0.050411548 | downregulated during regeneration - mid |
| ENSDART00000149029 | sagb               | 0.030697622 | -0.046274749 | -0.449576755 | -0.950069775 | -0.043925247 | downregulated during regeneration - mid |
| ENSDART00000149339 | si:ch211-175f12.2  | 0.046869499 | -0.297380973 | -0.332932663 | -0.389357991 | -0.204952824 | downregulated during regeneration - mid |
| ENSDART00000149352 | si:ch211-163l21.11 | 0.045582714 | -0.266781177 | -0.351609906 | -0.560319486 | -0.211979525 | downregulated during regeneration - mid |
| ENSDART00000149429 | boka               | 0.007908312 | -0.220682727 | -0.305502243 | -0.692638969 | -0.393597854 | downregulated during regeneration - mid |
| ENSDART00000149512 | CU467655.1         | 0.058548676 | -0.320227651 | -0.180971804 | -0.440965145 | -0.207148298 | downregulated during regeneration - mid |
| ENSDART00000149634 | atp6ap2            | 0.075143936 | -0.108949021 | -0.143807338 | -0.457436101 | -0.199272375 | downregulated during regeneration - mid |
| ENSDART00000149935 | nt5c3a             | 0.022408352 | 0.05115392   | -0.273408486 | -0.497911915 | -0.317644766 | downregulated during regeneration - mid |
| ENSDART00000150045 | adamts18           | 0.038201053 | -0.187059316 | -0.292648437 | -0.628764119 | 0.030985495  | downregulated during regeneration - mid |
| ENSDART00000150789 | USMG5              | 0.058128769 | -0.285153636 | -0.258859464 | -0.457141251 | -0.093210696 | downregulated during regeneration - mid |
| ENSDART00000151013 | ensaa              | 0.001153184 | -0.338295629 | -0.414678183 | -0.638369138 | -0.341312384 | downregulated during regeneration - mid |
| ENSDART00000151022 | si:ch211-191i18.4  | 0.046753078 | -0.318627462 | -0.467051418 | -0.723047751 | -0.473341501 | downregulated during regeneration - mid |
| ENSDART00000151203 | rgs9a              | 0.049667416 | -0.190499153 | -0.256482975 | -0.462262315 | -0.086082277 | downregulated during regeneration - mid |
| ENSDART00000151386 | CU659670.1         | 0.044578949 | -0.061309281 | -0.197320939 | -0.510180812 | -0.129307388 | downregulated during regeneration - mid |
| ENSDART00000151419 | tgfa               | 0.049309412 | -0.147139604 | -0.1316737   | -0.368157435 | -0.244071655 | downregulated during regeneration - mid |
| ENSDART00000151670 | fbxl16             | 0.055597767 | -0.100117774 | -0.155204519 | -0.627708744 | -0.129502503 | downregulated during regeneration - mid |
| ENSDART00000151808 | rcvrn3             | 0.013770716 | -0.028816037 | -0.156203513 | -0.580402071 | -0.415774036 | downregulated during regeneration - mid |
| ENSDART00000152005 | ppp1r13ba          | 0.024276272 | -0.032736325 | -0.117362615 | -0.454836475 | -0.009028338 | downregulated during regeneration - mid |
| ENSDART00000152172 | BX248418.1         | 0.005026826 | -0.267252802 | -0.476860817 | -0.659952516 | -0.030823789 | downregulated during regeneration - mid |
| ENSDART00000152689 | oplah              | 0.01992766  | -0.018001137 | -0.164313071 | -0.461321001 | -0.221934453 | downregulated during regeneration - mid |
| ENSDART00000152768 | si:ch211-2071.2    | 0.036445549 | -0.201357893 | -0.51029626  | -0.665018804 | -0.121583536 | downregulated during regeneration - mid |

|                    |                   |             |              |              |              |              |                                         |
|--------------------|-------------------|-------------|--------------|--------------|--------------|--------------|-----------------------------------------|
| ENSDART00000152968 | si:dkey-21c1.1    | 0.005983812 | 0.134479312  | -0.180316529 | -0.580606373 | -0.202289334 | downregulated during regeneration - mid |
| ENSDART00000153086 | kctd17            | 0.063822766 | -0.109500243 | -0.169719356 | -0.312398256 | -0.16098927  | downregulated during regeneration - mid |
| ENSDART00000153124 | CU570682.1        | 0.019075692 | -0.274154453 | -0.462025745 | -0.49154679  | -0.26836126  | downregulated during regeneration - mid |
| ENSDART00000153190 | vasb2             | 0.019554708 | -0.078136066 | -0.226923996 | -0.395295378 | -0.160874636 | downregulated during regeneration - mid |
| ENSDART00000153442 | rxfp2a            | 0.01711161  | -0.191591927 | -0.398184153 | -0.707111514 | -0.312025768 | downregulated during regeneration - mid |
| ENSDART00000153773 | cipca             | 0.004341144 | -0.044231438 | -0.31334692  | -0.44667945  | -0.17971329  | downregulated during regeneration - mid |
| ENSDART00000154085 | gipr              | 0.032143116 | -0.077819916 | -0.236822644 | -0.445528895 | -0.377678023 | downregulated during regeneration - mid |
| ENSDART00000154627 | eogt              | 0.014130752 | -0.136366673 | -0.382886458 | -0.560103122 | -0.203176718 | downregulated during regeneration - mid |
| ENSDART00000154917 | ciartb            | 0.004147933 | -0.07665894  | -0.17887759  | -0.516654864 | -0.219843882 | downregulated during regeneration - mid |
| ENSDART00000155078 | CU466278.1        | 0.067207866 | -0.496260032 | -0.275828398 | -0.937323619 | -0.494833793 | downregulated during regeneration - mid |
| ENSDART00000155088 | ankrd33ab         | 0.019678793 | -0.091123111 | -0.280595773 | -2.122583018 | -0.908625438 | downregulated during regeneration - mid |
| ENSDART00000155324 | pdpk1a            | 0.051252746 | -0.082713691 | -0.135052421 | -0.317218269 | -0.180842854 | downregulated during regeneration - mid |
| ENSDART00000155442 | ubap1a            | 0.036933769 | -0.102679722 | -0.709773263 | -0.512828077 | -0.333708251 | downregulated during regeneration - mid |
| ENSDART00000155580 | ccdc32            | 0.028277545 | -0.137851793 | -0.182759184 | -0.331717766 | -0.143672128 | downregulated during regeneration - mid |
| ENSDART00000155839 | CR759918.1        | 0.036715052 | -0.263859971 | -0.262088445 | -0.379170984 | -0.118091172 | downregulated during regeneration - mid |
| ENSDART00000155859 | larp4ab           | 0.007335615 | -0.193577441 | -0.330790279 | -0.534105504 | -0.201385609 | downregulated during regeneration - mid |
| ENSDART00000155956 | ssx2ipa           | 0.040205407 | -0.036908945 | -0.252732501 | -0.388773092 | -0.156731785 | downregulated during regeneration - mid |
| ENSDART00000156008 | adcy1b            | 0.021755167 | -0.126277791 | -0.148680925 | -0.963041725 | -0.495906031 | downregulated during regeneration - mid |
| ENSDART00000156051 | dhx32b            | 0.010222513 | -0.034036848 | -0.386771049 | -0.600165189 | -0.131769991 | downregulated during regeneration - mid |
| ENSDART00000156169 | ube2o             | 0.055683104 | -0.089939623 | -0.17956897  | -0.346977584 | -0.218736801 | downregulated during regeneration - mid |
| ENSDART00000156179 | sema7a            | 0.031092135 | -0.273960356 | -0.559537035 | -0.479585038 | -0.478067901 | downregulated during regeneration - mid |
| ENSDART00000156211 | adcyap1r1b        | 0.029377262 | -0.120918148 | -0.186017    | -0.540439336 | -0.277725276 | downregulated during regeneration - mid |
| ENSDART00000156247 | CU468915.1        | 0.04446722  | -0.147323171 | -0.162953088 | -0.662599642 | -0.420048082 | downregulated during regeneration - mid |
| ENSDART00000156365 | BX248121.1        | 0.044459756 | -0.069755444 | -0.2828198   | -0.35442143  | -0.173325265 | downregulated during regeneration - mid |
| ENSDART00000156438 | tiem138           | 0.003538125 | -0.131418974 | -0.291812606 | -0.603920899 | -0.471900931 | downregulated during regeneration - mid |
| ENSDART00000156492 | tiam2a            | 0.03593902  | -0.024981814 | -0.236489206 | -0.397107093 | -0.120407246 | downregulated during regeneration - mid |
| ENSDART00000156527 | crhr1             | 0.045012134 | -0.121975919 | -0.246139891 | -0.376184792 | -0.120567191 | downregulated during regeneration - mid |
| ENSDART00000156568 | CR387996.1        | 0.023717938 | -0.565799723 | -0.534585499 | -0.855400153 | -0.72349809  | downregulated during regeneration - mid |
| ENSDART00000156757 | CU633486.1        | 0.075604115 | -0.302968456 | -0.206059    | -0.531920994 | -0.165463059 | downregulated during regeneration - mid |
| ENSDART00000156831 | si:dkey-47f9.4    | 0.018916133 | -0.215799622 | -0.290204625 | -0.428110244 | -0.249285093 | downregulated during regeneration - mid |
| ENSDART00000156918 | si:dkey-16p21.8   | 0.016886751 | -0.278111877 | -0.271868386 | -0.501824009 | -0.172182623 | downregulated during regeneration - mid |
| ENSDART00000156967 | itcha             | 0.025939466 | -0.048958922 | -0.233534262 | -0.334119802 | -0.057332431 | downregulated during regeneration - mid |
| ENSDART00000157066 | ppp1r16b          | 0.028214992 | -0.047627867 | -0.115324195 | -0.408403631 | -0.014573035 | downregulated during regeneration - mid |
| ENSDART00000157437 | park2             | 0.017079861 | -0.135617769 | -0.306295495 | -0.445890787 | -0.195890902 | downregulated during regeneration - mid |
| ENSDART00000157515 | FO704641.1        | 0.005096692 | -0.135830256 | -0.41280018  | -0.451790561 | -0.015210245 | downregulated during regeneration - mid |
| ENSDART00000157570 | asmt              | 0.002360359 | -0.467907647 | -0.512776687 | -0.801096178 | -0.257600065 | downregulated during regeneration - mid |
| ENSDART00000157755 | cds1              | 0.00817514  | -0.167833858 | -0.281185983 | -0.514312915 | -0.176231692 | downregulated during regeneration - mid |
| ENSDART00000157979 | plppr5b           | 0.003299709 | -0.141986763 | -0.474240998 | -0.437275413 | -0.217953336 | downregulated during regeneration - mid |
| ENSDART00000158055 | kcnh6a            | 0.064248443 | -0.288242124 | -0.323669014 | -0.59331748  | -0.259833446 | downregulated during regeneration - mid |
| ENSDART00000158077 | arr3b             | 0.063631477 | -0.1360206   | -0.148118881 | -0.527427286 | -0.215489656 | downregulated during regeneration - mid |
| ENSDART00000158202 | CAB201078449.1    | 0.039683894 | -0.388078647 | -0.185889564 | -2.923902226 | 0.109460724  | downregulated during regeneration - mid |
| ENSDART00000158289 | taok1b            | 0.039389579 | -0.136932712 | -0.168799291 | -0.390684145 | -0.122927658 | downregulated during regeneration - mid |
| ENSDART00000158301 | CR749168.4        | 0.010360832 | -0.284512048 | -0.514337485 | -0.519239658 | -0.283197555 | downregulated during regeneration - mid |
| ENSDART00000158338 | CNNM1             | 0.001487078 | -0.362878072 | -0.490740729 | -0.646651234 | -0.29213891  | downregulated during regeneration - mid |
| ENSDART00000158395 | dclk2a            | 0.01163651  | -0.152411223 | -0.291700953 | -0.710292221 | -0.218291454 | downregulated during regeneration - mid |
| ENSDART00000158440 | arhgap12b         | 0.041157695 | -0.039244537 | -0.138433678 | -0.355110347 | -0.091493676 | downregulated during regeneration - mid |
| ENSDART00000158587 | casd1             | 0.047492859 | -0.21622109  | -0.133405356 | -0.572868553 | -0.255662771 | downregulated during regeneration - mid |
| ENSDART00000158692 | CAB201112401.1    | 0.000824931 | 0.113542035  | -0.344191992 | -0.461207823 | -0.256682679 | downregulated during regeneration - mid |
| ENSDART00000158854 | tpd52l1           | 0.028449452 | -0.063123021 | -0.257733521 | -0.65813611  | -0.260747428 | downregulated during regeneration - mid |
| ENSDART00000158917 | abhd10a           | 0.008288008 | -0.199951388 | -0.281143798 | -0.472212357 | -0.246558895 | downregulated during regeneration - mid |
| ENSDART00000158962 | dpf2              | 0.022330586 | 0.023344289  | -0.160855631 | -0.651177712 | -0.029134577 | downregulated during regeneration - mid |
| ENSDART00000159061 | si:ch211-185a18.2 | 0.068645885 | -0.270017947 | -0.418794122 | -0.535787315 | -0.21407671  | downregulated during regeneration - mid |
| ENSDART00000159123 | btdk17b           | 0.02583682  | -0.172708316 | -0.362184438 | -0.675325658 | -0.245697841 | downregulated during regeneration - mid |
| ENSDART00000159178 | hspa8             | 0.00434437  | -1.810725395 | -0.905134344 | -6.819365873 | -1.947204217 | downregulated during regeneration - mid |
| ENSDART00000159581 | CT583723.1        | 0.081780045 | -0.203564175 | -0.159816156 | -0.458224986 | -0.16588667  | downregulated during regeneration - mid |
| ENSDART00000159654 | CR847844.2        | 0.019450344 | 0.025394661  | -0.340096605 | -0.548288987 | -0.346027376 | downregulated during regeneration - mid |
| ENSDART00000159670 | abtb1             | 0.013224152 | -0.10462458  | -0.155472174 | -0.372376774 | -0.233981977 | downregulated during regeneration - mid |
| ENSDART00000159733 | CAB201063757.1    | 0.004296618 | 0.129910694  | -0.203491407 | -0.855433405 | -0.227320323 | downregulated during regeneration - mid |
| ENSDART00000159950 | si:ch1073-45of2.1 | 0.040770952 | -0.285454261 | -0.252056938 | -0.418320337 | -0.16839092  | downregulated during regeneration - mid |
| ENSDART00000159987 | si:dkey-65b13.13  | 0.035889612 | -0.209652039 | -0.259703439 | -0.637719895 | -0.234430743 | downregulated during regeneration - mid |
| ENSDART00000160115 | per1a             | 0.005681638 | 0.01503641   | -0.272737679 | -0.476359218 | -0.15653808  | downregulated during regeneration - mid |
| ENSDART00000160134 | hibadha           | 0.01949596  | -0.191259291 | -0.221221329 | -0.647202373 | -0.244609156 | downregulated during regeneration - mid |
| ENSDART00000160175 | SYNDIG1           | 0.040346146 | -0.028604943 | -0.23293463  | -0.464850771 | -0.153309965 | downregulated during regeneration - mid |
| ENSDART00000160242 | TYMP              | 0.002200182 | -0.668893964 | -0.374517624 | -0.757876583 | -0.434642219 | downregulated during regeneration - mid |
| ENSDART00000160284 | pclob             | 0.022160325 | -0.164621492 | -0.643566861 | -0.569524507 | -0.247739035 | downregulated during regeneration - mid |
| ENSDART00000160400 | gchfr             | 0.016130084 | -0.373470826 | -0.390793782 | -0.620398999 | -0.352985133 | downregulated during regeneration - mid |
| ENSDART00000160439 | CAB201037298.1    | 0.009820514 | -0.12483018  | -0.201319697 | -0.520978425 | -0.240731645 | downregulated during regeneration - mid |
| ENSDART00000160450 | CU571069.1        | 0.000313682 | -0.391785076 | -0.855515025 | -0.904047805 | -0.612021184 | downregulated during regeneration - mid |
| ENSDART00000160468 | ubl3a             | 0.003138642 | -0.157200321 | -0.291255908 | -0.684230474 | -0.436379037 | downregulated during regeneration - mid |
| ENSDART00000160495 | si:dkey-184p18.2  | 0.011672204 | 0.380936601  | -0.291566475 | -0.364392869 | -0.267264411 | downregulated during regeneration - mid |
| ENSDART00000160538 | arhgap21a         | 0.006013085 | -0.416942655 | -0.374699279 | -1.045101409 | -0.721453587 | downregulated during regeneration - mid |
| ENSDART00000160562 | impg2b            | 0.011993283 | 0.024461351  | -0.26080833  | -0.706384589 | -0.340668028 | downregulated during regeneration - mid |
| ENSDART00000160700 | dnm1l             | 0.023931815 | -0.370704077 | -0.348232697 | -0.495814147 | -0.141373029 | downregulated during regeneration - mid |
| ENSDART00000160742 | clmn              | 0.002103359 | -0.341601235 | -0.332225059 | -0.489517534 | -0.288919784 | downregulated during regeneration - mid |
| ENSDART00000160753 | GANAB (1 of many) | 0.023696289 | 0.004666803  | -0.095016348 | -0.32432452  | -0.161685037 | downregulated during regeneration - mid |

|                    |                     |             |              |              |              |              |                                         |
|--------------------|---------------------|-------------|--------------|--------------|--------------|--------------|-----------------------------------------|
| ENSDART00000160841 | si:ch211-248g20.5   | 0.022501885 | -0.153486145 | -0.342330243 | -0.525669956 | -0.178412263 | downregulated during regeneration - mid |
| ENSDART00000160866 | cry2                | 0.002361523 | -0.114688269 | -0.279009524 | -0.604836383 | -0.332518261 | downregulated during regeneration - mid |
| ENSDART00000161059 | tusc2a              | 0.013390976 | 0.068801861  | -0.121312821 | -0.423616648 | -0.242714442 | downregulated during regeneration - mid |
| ENSDART00000161261 | lmbrd2a             | 0.083564138 | -0.185598793 | -0.153033552 | -0.360733538 | -0.113007589 | downregulated during regeneration - mid |
| ENSDART00000161266 | CU928046.1          | 0.025523567 | -0.122765699 | -0.195535625 | -0.336584046 | -0.188368371 | downregulated during regeneration - mid |
| ENSDART00000161397 | atg13               | 0.021797231 | -0.137451879 | -0.18705676  | -0.405447689 | -0.269252338 | downregulated during regeneration - mid |
| ENSDART00000161440 | limch1b             | 0.039972057 | -0.008873535 | -0.193340096 | -0.430561872 | -0.157445684 | downregulated during regeneration - mid |
| ENSDART00000161652 | si:dkeyp-72e1.9     | 0.040887007 | -0.109528412 | -0.231594686 | -0.432617543 | -0.203491956 | downregulated during regeneration - mid |
| ENSDART00000161755 | CU681842.1          | 0.03135437  | -0.157328162 | -0.245310878 | -0.348302227 | -0.161138988 | downregulated during regeneration - mid |
| ENSDART00000161773 | KCNJ11 (1 of many)  | 0.040962132 | -0.422522277 | -0.360538989 | -0.607728772 | -0.332578335 | downregulated during regeneration - mid |
| ENSDART00000161823 | ubl3a               | 0.020595702 | -0.089124518 | -0.239047703 | -0.471864878 | -0.290785384 | downregulated during regeneration - mid |
| ENSDART00000161840 | CT574575.1          | 0.006228736 | -0.29915223  | -0.372107241 | -0.764083264 | -0.340151107 | downregulated during regeneration - mid |
| ENSDART00000161882 | bzw2                | 0.010880494 | 0.083435949  | -0.31200966  | -0.54901166  | -0.324311149 | downregulated during regeneration - mid |
| ENSDART00000162070 | tmem9               | 0.005875165 | -0.208225931 | -0.361514875 | -0.511868133 | -0.393713678 | downregulated during regeneration - mid |
| ENSDART00000162493 | kif5ab              | 0.000645779 | -0.358862317 | -0.407894033 | -0.585721315 | -0.34361757  | downregulated during regeneration - mid |
| ENSDART00000162664 | 5S_rRNA             | 0.014771508 | -0.438943374 | -1.186726175 | -0.920371372 | -0.548334869 | downregulated during regeneration - mid |
| ENSDART00000162669 | slc4a5              | 0.010442784 | -0.13383932  | -0.22542524  | -0.430682825 | -0.287279235 | downregulated during regeneration - mid |
| ENSDART00000162827 | si:dkey-92j12.5     | 0.030149141 | -0.013228451 | -0.265522895 | -0.385437174 | -0.080127062 | downregulated during regeneration - mid |
| ENSDART00000162858 | lmbrd1              | 0.053770748 | -0.243655467 | -0.23291492  | -0.332336473 | -0.114530821 | downregulated during regeneration - mid |
| ENSDART00000162875 | rogdi               | 0.014149547 | -0.224891588 | -0.27706391  | -0.36191309  | -0.159630193 | downregulated during regeneration - mid |
| ENSDART00000162940 | mob2b               | 0.021735616 | 0.020755037  | -0.2829937   | -0.541864256 | -0.204837959 | downregulated during regeneration - mid |
| ENSDART00000163093 | lrp12               | 0.015282229 | -0.07747456  | -0.233717712 | -0.371900586 | -0.129203418 | downregulated during regeneration - mid |
| ENSDART00000163250 | mef2cb              | 0.003671994 | 0.361224616  | -0.300957895 | -0.57227951  | -0.080214844 | downregulated during regeneration - mid |
| ENSDART00000163352 | imp2b               | 0.015981762 | -0.050961847 | -0.309849144 | -0.745225088 | -0.302394708 | downregulated during regeneration - mid |
| ENSDART00000163445 | zgc:109982          | 0.01612441  | 0.178949347  | -0.334063834 | -0.837955378 | -0.307869575 | downregulated during regeneration - mid |
| ENSDART00000163521 | si:ch1073-83n3.2    | 0.019433758 | -0.135028227 | -0.352956778 | -0.389044273 | -0.105210001 | downregulated during regeneration - mid |
| ENSDART00000163908 | rnasekb             | 0.014026672 | -0.236636314 | -0.265732137 | -0.418465587 | -0.246757364 | downregulated during regeneration - mid |
| ENSDART00000163935 | med30               | 0.026243123 | -0.198525489 | -0.227576976 | -0.505162548 | -0.348410732 | downregulated during regeneration - mid |
| ENSDART00000163976 | CAB201069287.1      | 0.008492808 | 0.247964945  | -0.272161916 | -0.466208233 | -0.362164102 | downregulated during regeneration - mid |
| ENSDART00000163998 | rps6ka3a            | 0.02187407  | 0.01131102   | -0.11493059  | -0.372925255 | -0.200625555 | downregulated during regeneration - mid |
| ENSDART00000164566 | akt3a               | 0.001867076 | 0.045255643  | -0.432188612 | -0.498284714 | -0.321504061 | downregulated during regeneration - mid |
| ENSDART00000164650 | pdk3b               | 0.093881144 | -0.133813888 | -0.219494437 | -0.474289524 | -0.225858079 | downregulated during regeneration - mid |
| ENSDART00000164695 | arl3l1              | 0.005956006 | -0.208201897 | -0.292202291 | -0.610724074 | -0.376046469 | downregulated during regeneration - mid |
| ENSDART00000164773 | CAB201072036.1      | 0.021489826 | -0.106672866 | -0.494009284 | -0.613761036 | -0.476277849 | downregulated during regeneration - mid |
| ENSDART00000164792 | cfap74              | 0.02603196  | -0.15899724  | -0.307564837 | -0.482816939 | -0.375147114 | downregulated during regeneration - mid |
| ENSDART00000164855 | crebl2              | 0.013882038 | -0.127345071 | -0.21222205  | -0.432997567 | -0.264872881 | downregulated during regeneration - mid |
| ENSDART00000164983 | anapc15             | 0.022231819 | -0.036185378 | -0.198619926 | -0.408385072 | -0.233599439 | downregulated during regeneration - mid |
| ENSDART00000165018 | cdc42se2            | 0.019981901 | -0.053295614 | -0.137825766 | -0.478383249 | -0.349419762 | downregulated during regeneration - mid |
| ENSDART00000165049 | imp2b               | 0.011108721 | -0.010489295 | -0.310856751 | -0.727501593 | -0.334825186 | downregulated during regeneration - mid |
| ENSDART00000165065 | uqcr10              | 0.046716104 | -0.222678585 | -0.318669731 | -0.412855116 | -0.201529958 | downregulated during regeneration - mid |
| ENSDART00000165308 | me2                 | 0.026211285 | -0.16075229  | -0.327815721 | -0.451710296 | -0.323851706 | downregulated during regeneration - mid |
| ENSDART00000165333 | si:ch211-2071f14.1  | 0.024829185 | -0.144575592 | -0.337549275 | -0.714109722 | -0.444634079 | downregulated during regeneration - mid |
| ENSDART00000165425 | aak1a               | 0.033202686 | -0.009756971 | -0.269537246 | -0.43668389  | -0.03607957  | downregulated during regeneration - mid |
| ENSDART00000165542 | si:dkeyp-72e1.9     | 0.014624499 | 0.115590472  | -0.201422352 | -0.774050016 | -0.351374892 | downregulated during regeneration - mid |
| ENSDART00000165557 | BX088524.3          | 0.018703026 | -0.275785171 | -0.331179811 | -0.469187171 | -0.127928431 | downregulated during regeneration - mid |
| ENSDART00000166177 | imp2b               | 0.000397106 | 0.006257085  | -0.447154942 | -0.735592553 | -0.255871486 | downregulated during regeneration - mid |
| ENSDART00000166241 | inpp5b              | 0.040796459 | -0.146961161 | -0.217731387 | -0.46875304  | -0.117265313 | downregulated during regeneration - mid |
| ENSDART00000166313 | thrb                | 0.0223553   | -0.193382381 | -0.415286369 | -0.400030228 | -0.136855946 | downregulated during regeneration - mid |
| ENSDART00000166374 | si:dkey-31f5.11     | 0.05364057  | -0.246069029 | -0.257528931 | -0.445065012 | -0.224168767 | downregulated during regeneration - mid |
| ENSDART00000166463 | cnot6b              | 0.033934614 | -0.099106983 | -0.163429858 | -0.300924183 | -0.105283807 | downregulated during regeneration - mid |
| ENSDART00000166515 | si:dkeyp-57d7.4     | 0.006203091 | -0.099733783 | -0.492859873 | -1.003446185 | -0.404973513 | downregulated during regeneration - mid |
| ENSDART00000166650 | bsg                 | 0.017988416 | -0.33252581  | -0.445374368 | -0.502358398 | -0.336861466 | downregulated during regeneration - mid |
| ENSDART00000166659 | lrrn2               | 0.002931511 | -0.321629641 | -0.404637061 | -0.652990901 | -0.235544369 | downregulated during regeneration - mid |
| ENSDART00000166714 | imp2b               | 0.033226863 | -0.072742859 | -0.391473223 | -0.740015258 | -0.360324281 | downregulated during regeneration - mid |
| ENSDART00000166843 | tom1                | 0.02794941  | -0.282793851 | -0.146845245 | -0.347923357 | -0.109554429 | downregulated during regeneration - mid |
| ENSDART00000167117 | si:ch1073-469d17.2  | 0.075212446 | -0.226355895 | -0.436402154 | -0.568359696 | -0.320345187 | downregulated during regeneration - mid |
| ENSDART00000167179 | asf1ba              | 0.000512281 | -0.325814646 | -0.52479315  | -0.773177729 | -0.605632897 | downregulated during regeneration - mid |
| ENSDART00000167391 | arhgap21a           | 0.004364661 | -0.385966805 | -0.235029359 | -0.527723306 | -0.308128762 | downregulated during regeneration - mid |
| ENSDART00000167570 | actr3b              | 0.000292971 | -0.361119463 | -0.449811578 | -0.822009016 | -0.639517901 | downregulated during regeneration - mid |
| ENSDART00000167612 | rnf34a              | 0.030702335 | -0.125673437 | -0.210904428 | -0.512991238 | -0.24247481  | downregulated during regeneration - mid |
| ENSDART00000167660 | pja2                | 0.003557275 | -0.078344887 | -0.326712885 | -0.382150009 | -0.239022195 | downregulated during regeneration - mid |
| ENSDART00000167948 | hcn1                | 0.022898139 | -0.135796002 | -0.504326543 | -0.514845616 | -0.152463147 | downregulated during regeneration - mid |
| ENSDART00000167977 | kcnh4b              | 0.021960856 | -0.815041676 | -0.830195363 | -1.200187818 | -0.588368652 | downregulated during regeneration - mid |
| ENSDART00000168036 | rdh8b               | 0.047560325 | -0.188576333 | -0.341040166 | -0.496499443 | -0.09323063  | downregulated during regeneration - mid |
| ENSDART00000168160 | pip5k1cb            | 0.007934853 | -0.047296457 | -0.43785038  | -0.478356963 | -0.284131261 | downregulated during regeneration - mid |
| ENSDART00000168531 | irf2bp2b            | 0.089399502 | -0.128403316 | -0.188582728 | -0.404745176 | -0.138034767 | downregulated during regeneration - mid |
| ENSDART00000168616 | ppa1a               | 0.022223646 | 0.095923853  | -0.258115212 | -0.556184684 | -0.293684673 | downregulated during regeneration - mid |
| ENSDART00000168639 | cry1ab              | 0.023297649 | -0.18716056  | -0.280815639 | -0.387838008 | -0.275846695 | downregulated during regeneration - mid |
| ENSDART00000168850 | taok1b              | 0.052592075 | -0.044686095 | -0.116318692 | -0.429811181 | -0.132610503 | downregulated during regeneration - mid |
| ENSDART00000169363 | CR678435.1          | 0.029303695 | -0.089321474 | -0.319658973 | -0.354063558 | -0.259523127 | downregulated during regeneration - mid |
| ENSDART00000169367 | CAB201061884.1      | 0.037612568 | -0.298329532 | -0.377577791 | -0.54544765  | -0.245416552 | downregulated during regeneration - mid |
| ENSDART00000169376 | PLEKHG5 (1 of many) | 0.004338147 | -0.003560342 | -0.365335228 | -0.516938003 | -0.057649582 | downregulated during regeneration - mid |
| ENSDART00000169484 | amp                 | 0.012342358 | -0.176945265 | -0.219628366 | -0.476094931 | -0.135317446 | downregulated during regeneration - mid |
| ENSDART00000169511 | ppp2r2bb            | 0.005388807 | -0.347621729 | -0.405720046 | -0.501873649 | -0.158073428 | downregulated during regeneration - mid |
| ENSDART00000169733 | klhl23              | 0.013248249 | -0.117061422 | -0.244154323 | -0.447638501 | -0.20478162  | downregulated during regeneration - mid |

|                    |                |              |              |               |              |              |                                          |
|--------------------|----------------|--------------|--------------|---------------|--------------|--------------|------------------------------------------|
| ENSDART00000169828 | rlbp1a         | 0.024411518  | -0.278789297 | -0.290042852  | -0.461967142 | -0.22894081  | downregulated during regeneration - mid  |
| ENSDART00000169932 | ccdc142        | 0.032850794  | -0.157730988 | -0.223081294  | -0.3402281   | -0.055715693 | downregulated during regeneration - mid  |
| ENSDART00000169943 | CABZ01084447.1 | 0.000529346  | -0.382296742 | -0.397697491  | -0.572266726 | -0.473542202 | downregulated during regeneration - mid  |
| ENSDART00000170012 | mapre3b        | 0.020911664  | -0.205130823 | -0.301066074  | -0.42167523  | -0.136278286 | downregulated during regeneration - mid  |
| ENSDART00000170208 | limch1b        | 0.017620686  | -0.042803542 | -0.148322889  | -0.621537079 | -0.273084471 | downregulated during regeneration - mid  |
| ENSDART00000170285 | def8           | 0.009606339  | -0.050118345 | -0.13948188   | -0.345534099 | -0.220243255 | downregulated during regeneration - mid  |
| ENSDART00000170376 | mpp7a          | 0.034023228  | -0.022565767 | -0.302686812  | -0.467837523 | -0.093897739 | downregulated during regeneration - mid  |
| ENSDART00000170546 | wdr17          | 0.062857343  | -0.20142732  | -0.213426713  | -0.433783757 | -0.087288031 | downregulated during regeneration - mid  |
| ENSDART00000170575 | nfat5b         | 0.018611393  | -0.001493923 | -0.392122738  | -0.566909919 | -0.288747412 | downregulated during regeneration - mid  |
| ENSDART00000170583 | 43167          | 0.022767452  | -0.037993536 | -0.377054474  | -0.284528801 | -0.103767971 | downregulated during regeneration - mid  |
| ENSDART00000170695 | lrit1b         | 0.041328295  | -0.349980517 | -0.215317539  | -0.688918418 | -0.304938883 | downregulated during regeneration - mid  |
| ENSDART00000170762 | slc44a5b       | 0.022987263  | -0.083921908 | -0.392138039  | -0.663427101 | -0.045247688 | downregulated during regeneration - mid  |
| ENSDART00000170756 | smu1b          | 0.004570574  | 0.00254355   | -0.339997639  | -0.798035862 | -0.487523616 | downregulated during regeneration - mid  |
| ENSDART00000170955 | fn3krp         | 0.064000341  | -0.183544623 | -0.156282547  | -0.395153052 | -0.231090781 | downregulated during regeneration - mid  |
| ENSDART00000171202 | clrn1          | 0.023596757  | -0.342498627 | -0.174544267  | -0.411984605 | -0.164186516 | downregulated during regeneration - mid  |
| ENSDART00000171237 | kcnj2b         | 0.002963545  | -0.406552715 | -0.524353506  | -0.661059283 | -0.393570981 | downregulated during regeneration - mid  |
| ENSDART00000171320 | dcp2           | 0.018930059  | -0.072540161 | -0.060086595  | -0.320231159 | -0.153613562 | downregulated during regeneration - mid  |
| ENSDART00000171393 | efr3a          | 0.008676069  | 0.028329226  | -0.20834437   | -0.54511994  | -0.110508442 | downregulated during regeneration - mid  |
| ENSDART00000171639 | prkacbb        | 0.016570302  | -0.216859972 | -0.333993863  | -0.380485937 | -0.232933535 | downregulated during regeneration - mid  |
| ENSDART00000171823 | cdc14ab        | 0.07124152   | -0.17216976  | -0.3147465    | -0.385013143 | -0.20236803  | downregulated during regeneration - mid  |
| ENSDART00000172076 | hook1          | 0.057207579  | -0.04243255  | -0.111929427  | -0.520350092 | -0.090216969 | downregulated during regeneration - mid  |
| ENSDART00000172114 | calm3a         | 0.016086191  | -0.154349916 | -0.209222212  | -0.409530683 | -0.13969668  | downregulated during regeneration - mid  |
| ENSDART00000172166 | NDUFC1         | 0.016665414  | -0.092745693 | -0.325133407  | -0.417118078 | -0.256060161 | downregulated during regeneration - mid  |
| ENSDART00000172190 | ajap1          | 0.020568703  | -0.155573908 | -0.463634934  | -0.533953643 | -0.131876486 | downregulated during regeneration - mid  |
| ENSDART00000172294 | ctps1b         | 0.0011175355 | -0.00552652  | -0.426760874  | -0.523567714 | -0.150809326 | downregulated during regeneration - mid  |
| ENSDART00000172662 | fam96a         | 0.013435197  | -0.029501914 | -0.191990056  | -0.34693921  | -0.272376792 | downregulated during regeneration - mid  |
| ENSDART00000172811 | ubap1lb        | 0.017531533  | 0.254294803  | -0.127702895  | -0.996786994 | -0.222342304 | downregulated during regeneration - mid  |
| ENSDART00000172944 | FO681390.1     | 0.035889612  | -0.061230657 | -0.175829366  | -0.634551101 | -0.148743958 | downregulated during regeneration - mid  |
| ENSDART00000173056 | arap3          | 0.010245667  | -0.20638853  | -0.2712105037 | -0.427111789 | -0.285607029 | downregulated during regeneration - mid  |
| ENSDART00000173169 | pclob          | 0.015925333  | -0.241926883 | -0.695024268  | -0.666850982 | -0.322920156 | downregulated during regeneration - mid  |
| ENSDART00000173400 | FP236327.1     | 0.017516593  | -0.107319508 | -0.233503644  | -0.613884847 | -0.314094176 | downregulated during regeneration - mid  |
| ENSDART00000173430 | pfkfb          | 0.002058842  | -0.150367408 | -0.216221217  | -0.597100494 | -0.348773684 | downregulated during regeneration - mid  |
| ENSDART00000003042 | mdkb           | 0.000235661  | -0.457982371 | -0.488604373  | -0.629508021 | -0.485178616 | downregulated during regeneration - late |
| ENSDART00000003612 | NA             | 0.0080829    | -0.145765054 | -0.499207076  | -0.35686816  | -0.607333409 | downregulated during regeneration - late |
| ENSDART00000004903 | rdh10b         | 0.01613952   | -0.385872948 | -0.19159484   | -0.565090954 | -0.486336464 | downregulated during regeneration - late |
| ENSDART00000005053 | slc12a4        | 0.020066139  | -0.135764977 | -0.039802706  | -0.399029267 | -0.999098872 | downregulated during regeneration - late |
| ENSDART00000007122 | guca1b         | 0.03198451   | -0.373174817 | -0.243090423  | -0.518795688 | -0.641476933 | downregulated during regeneration - late |
| ENSDART00000008010 | pdk2a          | 0.008401701  | -0.070635847 | 0.148907691   | -0.31523766  | -0.171233724 | downregulated during regeneration - late |
| ENSDART00000008326 | pon2           | 0.003003196  | 0.005358778  | -0.010211923  | -0.591626082 | -0.490299784 | downregulated during regeneration - late |
| ENSDART00000008607 | ttyh2l         | 0.001115539  | 0.127438148  | -0.071060271  | -0.346686037 | -0.327410338 | downregulated during regeneration - late |
| ENSDART00000009952 | zfang5a        | 0.001528476  | -0.376361025 | -0.47427013   | -1.180526792 | -1.063292908 | downregulated during regeneration - late |
| ENSDART00000010046 | rhpnp2         | 0.005024347  | -0.531285649 | -0.280012714  | -0.367908087 | -0.481376216 | downregulated during regeneration - late |
| ENSDART00000011135 | kita           | 0.005077923  | -0.1368269   | -0.266279657  | -0.502022945 | -0.592221276 | downregulated during regeneration - late |
| ENSDART00000011519 | slc6a1l        | 0.002718393  | 0.105782424  | -0.162202998  | -0.466558128 | -0.662799909 | downregulated during regeneration - late |
| ENSDART00000014843 | bdnf           | 0.000108354  | -0.27929745  | -0.434797241  | -0.517838864 | -0.969054184 | downregulated during regeneration - late |
| ENSDART00000015095 | uts1           | 0.00114562   | -0.304915972 | -0.432455801  | -0.651436618 | -0.693973757 | downregulated during regeneration - late |
| ENSDART00000017485 | sf3b6          | 0.015609101  | -0.19155437  | -0.273140548  | -0.376775786 | -0.432460535 | downregulated during regeneration - late |
| ENSDART00000018054 | trh            | 0.001423412  | -0.369432982 | -0.400024601  | -0.784012545 | -0.865751572 | downregulated during regeneration - late |
| ENSDART00000018347 | cab39l1        | 0.011046859  | -0.259625217 | -0.162823278  | -0.312896931 | -0.294075261 | downregulated during regeneration - late |
| ENSDART00000018886 | ghra           | 0.006658285  | -0.12746236  | -0.080311259  | -0.403757478 | -0.551820215 | downregulated during regeneration - late |
| ENSDART00000019766 | tgrfb3         | 0.020798309  | -0.14127581  | -0.182290633  | -0.363811528 | -0.271524635 | downregulated during regeneration - late |
| ENSDART00000020999 | angptl1a       | 0.068605693  | -0.447558553 | -0.389827093  | -0.516507166 | -1.101603289 | downregulated during regeneration - late |
| ENSDART00000021121 | stx5al         | 0.020719498  | -0.079551416 | -0.239231712  | -0.554538789 | -0.564757113 | downregulated during regeneration - late |
| ENSDART00000021168 | rxrga          | 0.00269825   | 0.040179684  | -0.194377683  | -0.381512289 | -0.377392107 | downregulated during regeneration - late |
| ENSDART00000022051 | gins1          | 0.011046859  | -0.049060202 | -0.07395231   | -0.409999594 | -0.285702931 | downregulated during regeneration - late |
| ENSDART00000022581 | rab22a         | 0.018963501  | -0.072513798 | -0.08434934   | -0.299709625 | -0.230388715 | downregulated during regeneration - late |
| ENSDART00000023613 | her6           | 0.030622517  | -0.335042933 | -0.234567638  | -0.250120727 | -0.59712361  | downregulated during regeneration - late |
| ENSDART00000024328 | slc34a2a       | 0.032189514  | -1.294382652 | -0.588426598  | -0.664087867 | -1.114341851 | downregulated during regeneration - late |
| ENSDART00000026085 | ptges          | 0.014800178  | -0.133597623 | -0.186036004  | -0.449634161 | -0.455296325 | downregulated during regeneration - late |
| ENSDART00000026316 | sema3gb        | 0.023200703  | -0.148485986 | -0.183297493  | -0.3621349   | -0.465943338 | downregulated during regeneration - late |
| ENSDART00000027417 | zgc:171704     | 0.00039492   | 0.227240571  | -0.665719796  | -1.161293822 | -1.438167938 | downregulated during regeneration - late |
| ENSDART00000029946 | ube2b          | 0.013774152  | -0.262228145 | -0.117966704  | -0.377845713 | -0.176574464 | downregulated during regeneration - late |
| ENSDART00000030579 | crhbp          | 0.001133915  | 0.109353477  | -0.053663997  | -0.382440888 | -0.742296052 | downregulated during regeneration - late |
| ENSDART00000031727 | vamp8          | 0.000787471  | 0.086516161  | -0.020853386  | -0.34297459  | -0.531441391 | downregulated during regeneration - late |
| ENSDART00000032393 | ginm1          | 0.012470284  | -0.05454012  | -0.092963972  | -0.327748186 | -0.224389181 | downregulated during regeneration - late |
| ENSDART00000032502 | nebl           | 0.026706504  | -0.405575453 | -0.348273521  | -0.638746976 | -0.69843843  | downregulated during regeneration - late |
| ENSDART00000034638 | ccdc28a        | 0.018433591  | -0.059055282 | -0.067802136  | -0.368600818 | -0.274995246 | downregulated during regeneration - late |
| ENSDART00000035031 | sgk1           | 0.002559781  | 0.036456511  | -0.228295468  | -0.323414575 | -0.393803665 | downregulated during regeneration - late |
| ENSDART00000035067 | abhd2a         | 0.008989451  | -0.08282686  | -0.122469223  | -0.369410687 | -0.218167862 | downregulated during regeneration - late |
| ENSDART00000038310 | ormdl3         | 0.010195593  | -0.300841314 | -0.124106092  | -0.535837175 | -0.413488994 | downregulated during regeneration - late |
| ENSDART00000038674 | tmem230a       | 0.005028852  | -0.312877262 | -0.360088684  | -0.444507782 | -0.485519275 | downregulated during regeneration - late |
| ENSDART00000039399 | cavin2a        | 0.000442465  | -0.454722967 | -0.463350309  | -0.727916614 | -0.482344794 | downregulated during regeneration - late |
| ENSDART00000042123 | cx52.6         | 0.003425348  | -0.622226461 | -0.079417665  | -0.692157173 | -0.611068819 | downregulated during regeneration - late |
| ENSDART00000042307 | fam60a         | 0.000248952  | -0.454119179 | -0.522927402  | -0.624149133 | -1.020018948 | downregulated during regeneration - late |
| ENSDART00000042481 | phf23a         | 0.019414194  | -0.371442433 | -0.230558793  | -0.302265692 | -0.28776115  | downregulated during regeneration - late |

|                   |                    |             |              |              |              |              |                                          |
|-------------------|--------------------|-------------|--------------|--------------|--------------|--------------|------------------------------------------|
| ENSDART0000043226 | guca1c             | 0.014712033 | -0.531402053 | -0.370893475 | -0.804093243 | -0.754648782 | downregulated during regeneration - late |
| ENSDART0000044426 | si:dkey-240h12.4   | 0.016178224 | 0.077516947  | -0.039107616 | -0.22879164  | -0.507759534 | downregulated during regeneration - late |
| ENSDART0000044860 | maff               | 0.002310171 | 0.057535561  | 0.039208376  | -0.366680053 | -0.441007369 | downregulated during regeneration - late |
| ENSDART0000045126 | lama5              | 0.007419702 | -0.044158589 | 0.007727115  | -0.324426294 | -0.496259172 | downregulated during regeneration - late |
| ENSDART0000046360 | rhoua              | 0.001489209 | -0.234114921 | -0.11992892  | -0.459682602 | -0.396381281 | downregulated during regeneration - late |
| ENSDART0000046716 | cited2             | 0.010493088 | -0.252125812 | -0.225219779 | -0.427941506 | -0.423861644 | downregulated during regeneration - late |
| ENSDART0000047378 | sst3               | 0.024602158 | -0.489863502 | -0.562162931 | -0.649979789 | -0.586308909 | downregulated during regeneration - late |
| ENSDART0000049075 | add3a              | 0.023840313 | -0.25124279  | -0.167771329 | -0.330721354 | -0.242087591 | downregulated during regeneration - late |
| ENSDART0000050230 | tspan3a            | 0.014404044 | -0.260999172 | -0.146975629 | -0.364155673 | -0.280149491 | downregulated during regeneration - late |
| ENSDART0000051197 | c10h2lorf59        | 0.043628495 | -0.175790498 | -0.1331203   | -0.516409592 | -0.442586367 | downregulated during regeneration - late |
| ENSDART0000051357 | zmat5              | 0.04367746  | -0.126081267 | -0.164432805 | -0.376616148 | -0.245219161 | downregulated during regeneration - late |
| ENSDART0000051516 | tacr1a             | 0.03254446  | -0.234436772 | -0.252170036 | -0.371966451 | -0.377528767 | downregulated during regeneration - late |
| ENSDART0000051546 | rps6ka3a           | 0.004239143 | -0.063688799 | 0.031915539  | -0.376231824 | -0.261540289 | downregulated during regeneration - late |
| ENSDART0000051655 | snrnp27            | 0.019324618 | -0.149284802 | -0.196914421 | -0.340354698 | -0.296345743 | downregulated during regeneration - late |
| ENSDART0000051948 | si:dkey-17m8.2     | 0.029473595 | -2.249269734 | -0.678959768 | -1.034434829 | -1.318620097 | downregulated during regeneration - late |
| ENSDART0000052029 | cart3              | 0.000305619 | -0.527262177 | -0.518524777 | -0.63363087  | -0.567396556 | downregulated during regeneration - late |
| ENSDART0000052573 | nrcy2              | 0.008879163 | -0.373632449 | -0.274093568 | -0.317163264 | -0.534996547 | downregulated during regeneration - late |
| ENSDART0000052703 | pnuc2b             | 0.005154611 | -0.072514611 | -0.317049949 | -0.490530665 | -0.459714357 | downregulated during regeneration - late |
| ENSDART0000052912 | pcdh20             | 0.016905836 | -0.38541457  | -0.110151808 | -0.462368809 | -0.238274084 | downregulated during regeneration - late |
| ENSDART0000053310 | tmem18             | 0.023272159 | -0.091641733 | -0.057752607 | -0.353980434 | -0.264448619 | downregulated during regeneration - late |
| ENSDART0000053463 | mgll               | 0.063259686 | -0.18197789  | -0.150318561 | -0.320930933 | -0.180307684 | downregulated during regeneration - late |
| ENSDART0000053773 | lsm6               | 0.013538515 | -0.104076864 | -0.094751595 | -0.350900229 | -0.413521857 | downregulated during regeneration - late |
| ENSDART0000053916 | mtnr1ab            | 0.032098855 | -0.333808774 | -0.363646472 | -0.291230509 | -0.411800208 | downregulated during regeneration - late |
| ENSDART0000054386 | qdpbr1             | 0.066779801 | -0.130677564 | -0.146959168 | -0.522581238 | -0.268035824 | downregulated during regeneration - late |
| ENSDART0000054462 | smim19             | 0.016203475 | -0.090105146 | -0.174385509 | -0.37090077  | -0.289350438 | downregulated during regeneration - late |
| ENSDART0000054867 | aup1               | 0.017245517 | -0.021467306 | -0.053295505 | -0.309019838 | -0.217937602 | downregulated during regeneration - late |
| ENSDART0000055139 | col9a3             | 0.000444888 | 0.340683061  | 0.20859259   | -0.192921312 | -1.195377277 | downregulated during regeneration - late |
| ENSDART0000055706 | her15.1            | 0.021144178 | -1.483608056 | -1.154441068 | -0.698110478 | -1.436427969 | downregulated during regeneration - late |
| ENSDART0000055709 | her2               | 0.030146589 | -0.984524994 | -0.833253569 | -0.717745512 | -1.233522642 | downregulated during regeneration - late |
| ENSDART0000055779 | ggact.2            | 0.030279926 | -0.390632373 | -0.197002813 | -0.565987089 | -0.546417063 | downregulated during regeneration - late |
| ENSDART0000056939 | zgc:85858          | 0.037793991 | -0.254903494 | -0.357469282 | -0.615277126 | -0.499477333 | downregulated during regeneration - late |
| ENSDART0000056996 | sfrp5              | 0.011389892 | 0.077859934  | 0.016222227  | -0.244583159 | -1.042810978 | downregulated during regeneration - late |
| ENSDART0000057124 | tefa               | 0.007560757 | -0.17959692  | 0.074135039  | -0.330628318 | -0.262330789 | downregulated during regeneration - late |
| ENSDART0000057125 | tefa               | 0.002939873 | -0.190705988 | 0.094171259  | -0.306461854 | -0.301060608 | downregulated during regeneration - late |
| ENSDART0000057439 | parla              | 0.056801891 | -0.763945698 | -0.13237506  | -0.4980372   | -0.373141189 | downregulated during regeneration - late |
| ENSDART0000057519 | zgc:194209         | 0.001633797 | 0.014343488  | -0.12072846  | -0.449908342 | -0.453116382 | downregulated during regeneration - late |
| ENSDART0000057689 | bag3               | 0.030198325 | -0.537315577 | -0.216528912 | -0.658528557 | -0.795247472 | downregulated during regeneration - late |
| ENSDART0000057865 | ier3ip1            | 0.003879543 | -0.032004312 | -0.236273649 | -0.345681209 | -0.364367077 | downregulated during regeneration - late |
| ENSDART0000058667 | RDH13 (1 of many)  | 0.0088045   | -0.138024992 | -0.086121321 | -0.690305733 | -0.540517763 | downregulated during regeneration - late |
| ENSDART0000059478 | lrrc32             | 0.00518047  | -0.083635057 | -0.196945688 | -0.286292563 | -0.79945825  | downregulated during regeneration - late |
| ENSDART0000059550 | lrrc51             | 0.005486754 | -1.204791639 | -0.640574252 | -1.049736423 | -1.0433072   | downregulated during regeneration - late |
| ENSDART0000060174 | jagn1a             | 0.011982948 | -0.416430339 | -0.038483688 | -0.018273384 | -0.314381472 | downregulated during regeneration - late |
| ENSDART0000060304 | dhrs13a.3          | 0.001013659 | -0.00917183  | 0.036729289  | -0.280144118 | -0.407439325 | downregulated during regeneration - late |
| ENSDART0000061007 | mt2                | 0.000122194 | -0.024087588 | -0.437804286 | -0.890429121 | -0.686083783 | downregulated during regeneration - late |
| ENSDART0000061117 | rrpb1b             | 0.019354723 | -0.094086695 | 0.044237559  | -0.324207933 | -0.60750175  | downregulated during regeneration - late |
| ENSDART0000061261 | cx43               | 0.004463264 | -0.064274202 | -0.132171143 | -0.392515504 | -0.502400185 | downregulated during regeneration - late |
| ENSDART0000061435 | hsbp1b             | 0.014624499 | -0.02310974  | -0.083751559 | -0.317854229 | -0.256774332 | downregulated during regeneration - late |
| ENSDART0000062066 | si:dkey-177p2.6    | 0.005438298 | -0.250914133 | -0.251912097 | -0.422547135 | -0.291399654 | downregulated during regeneration - late |
| ENSDART0000062143 | zgc:77650          | 0.004824695 | -0.109887255 | -0.133378465 | -0.376117658 | -0.331935654 | downregulated during regeneration - late |
| ENSDART0000062181 | RALGDS             | 0.019466285 | -0.386705371 | -0.180287867 | -0.473841885 | -0.479084169 | downregulated during regeneration - late |
| ENSDART0000062518 | gstr               | 0.027807337 | -0.173225499 | -0.241367808 | -0.232576695 | -0.339957813 | downregulated during regeneration - late |
| ENSDART0000063625 | gpx3               | 0.000679804 | 0.093413749  | 0.050792899  | -0.431389541 | -0.288399492 | downregulated during regeneration - late |
| ENSDART0000063804 | wu:fj39g12         | 0.000278198 | -1.205265642 | -1.354971991 | -1.517691105 | -1.318916155 | downregulated during regeneration - late |
| ENSDART0000064111 | faub               | 0.021419678 | 0.024926044  | -0.061766338 | -0.402186419 | -0.29870419  | downregulated during regeneration - late |
| ENSDART0000064376 | sod1               | 0.030292962 | -0.248477917 | -0.212122084 | -0.427881094 | -0.390078569 | downregulated during regeneration - late |
| ENSDART0000064878 | gxy1t2             | 0.010154159 | -0.088947943 | -0.180342387 | -0.380560197 | -0.388684923 | downregulated during regeneration - late |
| ENSDART0000066703 | rdh10a             | 0.019015879 | -0.287660525 | -0.158056129 | -0.356819377 | -0.262167994 | downregulated during regeneration - late |
| ENSDART0000067239 | guca1g             | 0.003508363 | -0.979413995 | -1.042352228 | -1.597708164 | -1.275542792 | downregulated during regeneration - late |
| ENSDART0000067362 | cart2              | 0.014638227 | -0.749355761 | -0.384853037 | -0.719287733 | -0.625188951 | downregulated during regeneration - late |
| ENSDART0000067446 | slc38a4            | 0.000237691 | -0.251589327 | -0.331078479 | -0.606665517 | -0.538910759 | downregulated during regeneration - late |
| ENSDART0000071000 | osgn1              | 0.000510711 | 0.255332714  | 0.013078065  | -0.613186841 | -0.487873824 | downregulated during regeneration - late |
| ENSDART0000074380 | tsga10             | 0.026816553 | -0.358572407 | -0.32335115  | -0.582555062 | -0.41305108  | downregulated during regeneration - late |
| ENSDART0000074458 | ptpmt1             | 0.006314435 | -0.138560892 | -0.279060294 | -0.535667209 | -0.518833125 | downregulated during regeneration - late |
| ENSDART0000075150 | bmp4               | 0.0114419   | -0.321654174 | -0.192558055 | -0.354985644 | -0.520317573 | downregulated during regeneration - late |
| ENSDART0000075499 | si:dkey-283b1.7    | 0.001565956 | -0.75135255  | -0.256638623 | -0.866666345 | -0.691414461 | downregulated during regeneration - late |
| ENSDART0000075519 | aldh1a2            | 0.047619389 | -0.136704985 | -0.161016939 | -0.528203419 | -0.420522124 | downregulated during regeneration - late |
| ENSDART0000075663 | cracr2b            | 0.004668635 | 0.080855847  | 0.057965052  | -0.927246946 | -0.842015409 | downregulated during regeneration - late |
| ENSDART0000076066 | lin37              | 0.005026727 | -0.271630899 | -0.17922011  | -0.496068109 | -0.578879729 | downregulated during regeneration - late |
| ENSDART0000077008 | alox5ap            | 0.0014833   | -0.122237557 | -0.082901221 | -0.550940123 | -0.70030614  | downregulated during regeneration - late |
| ENSDART0000077080 | PTP4A3 (1 of many) | 0.006896678 | 0.077833133  | 0.004217905  | -0.463336754 | -0.666773375 | downregulated during regeneration - late |
| ENSDART0000077411 | cxcl12b            | 0.001960123 | -0.236947042 | -0.2488008   | -0.593903488 | -0.559818867 | downregulated during regeneration - late |
| ENSDART0000077951 | pcolce2b           | 0.013245259 | -0.119540012 | -0.232226227 | -0.447813206 | -1.286575617 | downregulated during regeneration - late |
| ENSDART0000078148 | smc1a              | 0.041808931 | -3.39991944  | -0.069804776 | -1.248223526 | -0.569589215 | downregulated during regeneration - late |
| ENSDART0000078181 | SLC3A2 (1 of many) | 0.020491546 | -0.23816401  | -0.122270906 | -0.56307324  | -1.283472558 | downregulated during regeneration - late |
| ENSDART0000078449 | itih6              | 0.002591094 | -0.23325998  | -0.04381884  | -0.494745518 | -1.555031348 | downregulated during regeneration - late |

|                   |                     |             |              |              |              |              |                                          |
|-------------------|---------------------|-------------|--------------|--------------|--------------|--------------|------------------------------------------|
| ENSDART0000078858 | si:ch73-86n18.1     | 0.003028992 | 0.106229924  | -0.155735751 | -0.58770094  | -0.854457693 | downregulated during regeneration - late |
| ENSDART0000078916 | smim7               | 0.014686352 | -0.217464923 | -0.109941617 | -0.350272436 | -0.25934653  | downregulated during regeneration - late |
| ENSDART0000079112 | calca               | 0.031235096 | -0.439449486 | -0.32190484  | -0.601830596 | -0.728154291 | downregulated during regeneration - late |
| ENSDART0000079879 | si:dkey-91i10.3     | 0.060601627 | -0.580141681 | -0.553279281 | -0.678150475 | -0.52463511  | downregulated during regeneration - late |
| ENSDART0000080014 | rps8b               | 0.012554187 | -0.261943359 | -0.309301007 | -0.481979191 | -0.409711249 | downregulated during regeneration - late |
| ENSDART0000081946 | zgc:112332          | 0.003060275 | -0.051059621 | 0.027246103  | -0.289131429 | -0.652053172 | downregulated during regeneration - late |
| ENSDART0000082151 | uqcrh               | 0.037614097 | -0.212671975 | -0.358890471 | -0.337939592 | -0.281374001 | downregulated during regeneration - late |
| ENSDART0000083367 | prcp                | 0.014634638 | -0.058674879 | -0.090308681 | -0.37460188  | -0.414832363 | downregulated during regeneration - late |
| ENSDART0000084055 | fzd7a               | 0.04742464  | -0.350921417 | -0.318886271 | -0.299513467 | -0.86880486  | downregulated during regeneration - late |
| ENSDART0000084131 | fam160b2            | 0.009592472 | 0.036570039  | -0.082247362 | -0.429951116 | -0.30533058  | downregulated during regeneration - late |
| ENSDART0000084598 | vimp                | 0.005671256 | -0.003252442 | -0.076004393 | -0.324006724 | -0.304272734 | downregulated during regeneration - late |
| ENSDART0000084861 | cish                | 0.004022079 | -0.446878588 | -0.18032932  | -1.508647694 | -1.506136587 | downregulated during regeneration - late |
| ENSDART0000085014 | tnfrsf9a            | 0.001754036 | -0.468498688 | -0.352709139 | -0.665957795 | -1.403982945 | downregulated during regeneration - late |
| ENSDART0000085442 | mnut                | 0.009834259 | -0.094284216 | -0.181855717 | -0.336054518 | -0.342951233 | downregulated during regeneration - late |
| ENSDART0000086051 | mecom               | 0.04049764  | -0.550304416 | -0.298852875 | -0.293768303 | -1.334615988 | downregulated during regeneration - late |
| ENSDART0000086905 | nrn1lb              | 0.000133356 | -0.455174799 | -0.417502528 | -0.690990621 | -0.656036806 | downregulated during regeneration - late |
| ENSDART0000087339 | cdon                | 0.026243123 | -0.366409006 | -0.160970657 | -0.495687672 | -0.865355598 | downregulated during regeneration - late |
| ENSDART0000088342 | cytip               | 0.00140081  | 0.001918005  | -0.070156162 | -0.471206178 | -0.369058853 | downregulated during regeneration - late |
| ENSDART0000089015 | zbtb7a              | 0.00191624  | -0.478666207 | -0.203919761 | -0.738823143 | -0.713706626 | downregulated during regeneration - late |
| ENSDART0000089339 | dph7                | 0.018858047 | -0.317220664 | -0.267955931 | -0.402220665 | -0.245139947 | downregulated during regeneration - late |
| ENSDART0000089342 | cpaf126             | 0.014365121 | -0.196227391 | -0.233968621 | -0.449699376 | -0.526724945 | downregulated during regeneration - late |
| ENSDART0000091124 | aifm3               | 0.010447806 | -0.238811768 | -0.279253276 | -0.598306352 | -0.861256088 | downregulated during regeneration - late |
| ENSDART0000091156 | tacc1               | 0.012895641 | -0.166984032 | -0.162668339 | -0.396514006 | -0.330157066 | downregulated during regeneration - late |
| ENSDART0000091252 | spta13              | 0.001728321 | 0.108055641  | -0.023595371 | -0.309799561 | -0.91906317  | downregulated during regeneration - late |
| ENSDART0000093000 | PLKHB1              | 0.010802023 | -0.366311468 | -0.143931789 | -0.403311135 | -0.393296015 | downregulated during regeneration - late |
| ENSDART0000098045 | gas1b               | 0.005181375 | -0.225161666 | -0.17230943  | -0.331649886 | -0.52065088  | downregulated during regeneration - late |
| ENSDART0000098575 | trim110             | 0.020470078 | -0.538539785 | -0.074004136 | -0.613819609 | -0.257802554 | downregulated during regeneration - late |
| ENSDART0000099089 | ggcx                | 0.031769506 | -0.059935848 | -0.149142859 | -0.333945915 | -0.254577798 | downregulated during regeneration - late |
| ENSDART0000099208 | asph                | 0.026872157 | -0.288641006 | -0.271409423 | -0.460024196 | -0.387402543 | downregulated during regeneration - late |
| ENSDART0000099476 | fam174b             | 0.003432504 | -0.249603276 | -0.126773683 | -0.376574062 | -0.35637543  | downregulated during regeneration - late |
| ENSDART0000099528 | spry4               | 0.000910711 | -1.005535524 | -0.789062042 | -0.760146662 | -1.480463024 | downregulated during regeneration - late |
| ENSDART0000100286 | fgfr4               | 0.004958321 | -0.349487842 | -0.279142199 | -0.557520873 | -0.83628708  | downregulated during regeneration - late |
| ENSDART0000100386 | mstnb               | 0.032308002 | -0.232479836 | -0.19741782  | -0.546065599 | -0.487217319 | downregulated during regeneration - late |
| ENSDART0000100605 | ttc32               | 0.004111621 | -0.362267617 | -0.196641209 | -0.477779827 | -0.443477008 | downregulated during regeneration - late |
| ENSDART0000102125 | schip1              | 0.014880314 | -0.065634739 | -0.008431238 | -0.356995513 | -0.237294266 | downregulated during regeneration - late |
| ENSDART0000103586 | hdac9b              | 0.003730132 | -0.63802499  | -0.480501706 | -0.6152094   | -0.590506452 | downregulated during regeneration - late |
| ENSDART0000103785 | ggact.3             | 0.044966319 | -1.209900002 | -0.367470534 | -1.050388105 | -0.531293993 | downregulated during regeneration - late |
| ENSDART0000103795 | ggact.1             | 0.008574428 | 0.007439004  | -0.050660849 | -0.406911538 | -0.573615848 | downregulated during regeneration - late |
| ENSDART0000104043 | dkk3b               | 0.003678598 | 0.124905707  | -0.440538945 | -0.566305744 | -1.06504734  | downregulated during regeneration - late |
| ENSDART0000104257 | lpin1               | 0.011195192 | -0.263973453 | -0.162876624 | -0.357103753 | -0.3626544   | downregulated during regeneration - late |
| ENSDART0000104545 | avpr2ab             | 0.033298538 | -0.127228111 | -0.325246207 | -0.456539735 | -1.288721053 | downregulated during regeneration - late |
| ENSDART0000104592 | pm20d1.2            | 0.003337853 | -0.022497234 | -0.114097556 | -0.391118153 | -0.365853437 | downregulated during regeneration - late |
| ENSDART0000105323 | zgc:162255          | 0.003678598 | -0.250927131 | -0.470845634 | -0.44137647  | -0.557741796 | downregulated during regeneration - late |
| ENSDART0000105813 | krt222              | 0.028543949 | -0.522679169 | -0.470823148 | -0.650543043 | -0.842913393 | downregulated during regeneration - late |
| ENSDART0000105903 | lsm5                | 0.003228981 | 0.135971292  | -0.078983757 | -0.333257253 | -0.331997667 | downregulated during regeneration - late |
| ENSDART0000109124 | rspo2               | 0.005414718 | 0.077521406  | 0.271943255  | -0.228972258 | -0.854369599 | downregulated during regeneration - late |
| ENSDART0000109546 | unc5b               | 0.002533609 | -0.076752071 | -0.101810869 | -0.423560106 | -0.292578205 | downregulated during regeneration - late |
| ENSDART0000109853 | zmp:000000801       | 0.002881312 | -0.4485216   | -0.462342097 | -0.503236916 | -0.960013508 | downregulated during regeneration - late |
| ENSDART0000110544 | znf219              | 0.031344075 | -0.234403747 | -0.210451301 | -0.211690001 | -0.32688667  | downregulated during regeneration - late |
| ENSDART0000111165 | best2               | 0.019484745 | -0.15773889  | -0.249582303 | -0.643700083 | -1.151697377 | downregulated during regeneration - late |
| ENSDART0000111767 | si:ch211-39k3.2     | 0.001551573 | -0.094085509 | -0.095643794 | -0.600534706 | -0.396103136 | downregulated during regeneration - late |
| ENSDART0000111799 | HEPACAM (1 of many) | 0.022218395 | -0.300776869 | -0.301240305 | -0.377807505 | -0.329578876 | downregulated during regeneration - late |
| ENSDART0000111905 | BX649498.1          | 0.031814592 | -0.175767299 | -0.206924623 | -0.494153858 | -0.425985895 | downregulated during regeneration - late |
| ENSDART0000112333 | cnm2b               | 0.00144644  | -0.413171039 | -0.296279679 | -0.539640998 | -0.529524127 | downregulated during regeneration - late |
| ENSDART0000112579 | scg2b               | 0.00638925  | -0.360046965 | -0.210825369 | -0.351760362 | -0.440018453 | downregulated during regeneration - late |
| ENSDART0000112845 | zgc:195173          | 0.001259259 | -0.156651959 | -0.182049019 | -0.580426063 | -0.462296521 | downregulated during regeneration - late |
| ENSDART0000112856 | TNC (1 of many)     | 0.024409241 | -0.33689758  | -0.285587425 | -0.51132075  | -1.127367477 | downregulated during regeneration - late |
| ENSDART0000113197 | prok1               | 0.007586659 | -0.431580361 | -0.477066939 | -0.390033973 | -0.689815046 | downregulated during regeneration - late |
| ENSDART0000113734 | chrdl2              | 0.03875014  | -0.47545279  | -0.359333121 | -0.57438139  | -0.417914769 | downregulated during regeneration - late |
| ENSDART0000113859 | crispld1a           | 0.000346997 | 0.006653123  | -0.124334074 | -0.47278833  | -1.109435686 | downregulated during regeneration - late |
| ENSDART0000114319 | si:ch211-76l23.7    | 0.037291854 | -0.274578898 | -0.196596974 | -0.473622321 | -1.111584541 | downregulated during regeneration - late |
| ENSDART0000114676 | gstm.2              | 0.00889295  | 0.102339801  | -0.045272058 | -0.466318631 | -0.673317054 | downregulated during regeneration - late |
| ENSDART0000115356 | rabif               | 0.025960292 | -0.104235333 | -0.157538528 | -0.394672329 | -0.327606577 | downregulated during regeneration - late |
| ENSDART0000116415 | NA                  | 0.01907307  | -0.367308157 | -0.297245306 | -0.576085374 | -0.866023911 | downregulated during regeneration - late |
| ENSDART0000112126 | FO704882.1          | 0.007797716 | -0.227266262 | -0.409349874 | -0.661498137 | -0.983304677 | downregulated during regeneration - late |
| ENSDART0000121675 | angptl1a            | 0.033012979 | -0.785726694 | -0.739578659 | -0.711456    | -1.277545302 | downregulated during regeneration - late |
| ENSDART0000121716 | FAM107A             | 0.022475824 | -0.353665396 | -0.22740498  | -0.416694229 | -0.314761483 | downregulated during regeneration - late |
| ENSDART0000121817 | fbn1                | 0.002545259 | 0.143978228  | 0.156275351  | -0.420940219 | -1.064416584 | downregulated during regeneration - late |
| ENSDART0000123259 | si:dkey-164f24.2    | 0.005230737 | -0.316246733 | -0.171154186 | -0.508268616 | -0.361228089 | downregulated during regeneration - late |
| ENSDART0000122519 | st8sia6             | 0.009263888 | -0.258839848 | -0.191246071 | -0.329756561 | -0.383108642 | downregulated during regeneration - late |
| ENSDART0000122966 | hapln1a             | 0.031344075 | -5.328261829 | -0.041096146 | -1.913311737 | -3.425165696 | downregulated during regeneration - late |
| ENSDART0000123282 | si:dkey-7i4.1       | 0.03479782  | -0.131885839 | -0.288104676 | -0.328002164 | -0.299371464 | downregulated during regeneration - late |
| ENSDART0000124762 | hsp70.1             | 0.013341759 | -0.061931986 | -0.652822267 | -0.746588848 | -0.837604985 | downregulated during regeneration - late |
| ENSDART0000125116 | tnfaip8l3           | 0.008910267 | -0.29259694  | -0.291950956 | -0.382018775 | -0.337072666 | downregulated during regeneration - late |
| ENSDART0000125691 | sntb1               | 0.003107952 | -0.296403963 | -0.433378655 | -0.538134366 | -0.484556917 | downregulated during regeneration - late |

|                    |                    |              |              |              |              |              |                                          |
|--------------------|--------------------|--------------|--------------|--------------|--------------|--------------|------------------------------------------|
| ENSDART00000125923 | cxcl14             | 0.013886694  | -0.090480689 | -0.043715373 | -0.409912244 | -0.49269465  | downregulated during regeneration - late |
| ENSDART00000126870 | ndufa4l2b          | 0.005353377  | -0.364506533 | -0.363911454 | -0.576856062 | -0.429052776 | downregulated during regeneration - late |
| ENSDART00000127093 | CR749162.1         | 0.045674994  | -1.06520168  | -0.24719149  | -0.825954556 | -0.565925266 | downregulated during regeneration - late |
| ENSDART00000127536 | cbx7b              | 0.007396728  | -0.401352835 | -0.168978702 | -0.391659396 | -0.597817617 | downregulated during regeneration - late |
| ENSDART00000128011 | tnfsf10l3          | 0.014034602  | -0.207145482 | -0.351713028 | -0.904110327 | -0.837055548 | downregulated during regeneration - late |
| ENSDART00000128014 | dnah2              | 0.046252381  | -0.407226928 | -0.498892771 | -0.604204962 | -0.453086208 | downregulated during regeneration - late |
| ENSDART00000128127 | slc38a3b           | 0.005596862  | -0.302545777 | -0.299963192 | -0.361680425 | -0.612800784 | downregulated during regeneration - late |
| ENSDART00000128149 | fam32a             | 0.003797938  | -0.07314666  | -0.18816053  | -0.368263865 | -0.361807904 | downregulated during regeneration - late |
| ENSDART00000132914 | COX7A2 (1 of many) | 0.01962183   | -0.085157083 | -0.364093354 | -0.62455009  | -0.475756885 | downregulated during regeneration - late |
| ENSDART00000129597 | sorbs3             | 0.003535619  | 0.016863628  | 0.072993125  | -0.314882072 | -0.546339357 | downregulated during regeneration - late |
| ENSDART00000129710 | crtac1a            | 0.003137832  | -0.277382094 | 0.025987329  | -0.337990061 | -0.608225673 | downregulated during regeneration - late |
| ENSDART00000130264 | rpz                | 0.050182269  | -0.422979934 | -0.28718615  | -0.432905099 | -0.242626605 | downregulated during regeneration - late |
| ENSDART00000131027 | TMEM216            | 0.033109676  | -0.171407049 | -0.12306379  | -0.494331831 | -0.331123076 | downregulated during regeneration - late |
| ENSDART00000131582 | cbx3b              | 0.014192021  | -0.219219    | -0.174464705 | -0.354832647 | -0.341719477 | downregulated during regeneration - late |
| ENSDART00000132915 | serpine3           | 0.007368463  | -0.093377161 | -0.220423221 | -0.800809367 | -1.077921671 | downregulated during regeneration - late |
| ENSDART00000132995 | ak3                | 0.000854936  | 0.087221034  | 0.050666468  | -0.189471235 | -0.418943401 | downregulated during regeneration - late |
| ENSDART00000132996 | CU467110.1         | 0.0321077    | -0.265746647 | -0.189978673 | -0.362219245 | -0.151144337 | downregulated during regeneration - late |
| ENSDART00000133891 | FP015789.1         | 0.00918017   | -0.349747936 | -0.468679484 | -0.676764109 | -0.710268862 | downregulated during regeneration - late |
| ENSDART00000134202 | ccka               | 0.012864775  | -0.373763887 | -0.443030746 | -0.635815918 | -0.444990754 | downregulated during regeneration - late |
| ENSDART00000135403 | nuak2              | 0.022463379  | -0.203159013 | -0.012266437 | -0.34684763  | -0.520334493 | downregulated during regeneration - late |
| ENSDART00000135556 | lonrf1             | 0.00148037   | -0.030548829 | -0.12550287  | -0.445965292 | -0.332349033 | downregulated during regeneration - late |
| ENSDART00000136049 | syt10              | 0.00992455   | -0.382437751 | -0.322146795 | -0.465356993 | -0.383104059 | downregulated during regeneration - late |
| ENSDART00000136084 | mphas1             | 0.005371229  | -0.229093837 | -0.123648609 | -0.428888075 | -0.346098599 | downregulated during regeneration - late |
| ENSDART00000136190 | si:ch211-13315.7   | 0.008776907  | 0.046455816  | -0.284643729 | -0.455348095 | -0.512898339 | downregulated during regeneration - late |
| ENSDART00000136538 | cish               | 0.003012303  | -0.292880454 | -0.456120289 | -0.971812918 | -1.16494411  | downregulated during regeneration - late |
| ENSDART00000138308 | gpr186             | 0.002651594  | -1.473279373 | -0.953004046 | -1.169373422 | -1.314238919 | downregulated during regeneration - late |
| ENSDART00000138661 | tspan11            | 0.00016317   | -0.312645804 | -0.301551652 | -0.855364566 | -0.684847545 | downregulated during regeneration - late |
| ENSDART00000139174 | fam46c             | 0.014064789  | -0.16066992  | -0.125475027 | -0.118453643 | -0.616919987 | downregulated during regeneration - late |
| ENSDART00000139701 | zand5a             | 0.001239881  | -0.357581428 | -0.278083252 | -0.905903537 | -0.782247372 | downregulated during regeneration - late |
| ENSDART00000140779 | fundc1             | 0.026565285  | -1.365145935 | -0.380101108 | -0.950161557 | -1.079798871 | downregulated during regeneration - late |
| ENSDART00000140828 | CU179758.1         | 0.006872094  | -0.432947507 | -0.14249918  | -0.435392677 | -0.381420161 | downregulated during regeneration - late |
| ENSDART00000141030 | pde4ca             | 0.026489121  | -0.308097694 | -0.281646468 | -0.391359015 | -0.416436171 | downregulated during regeneration - late |
| ENSDART00000141345 | si:ch211-13315.7   | 0.002874771  | 0.067098833  | -0.266407921 | -0.458017208 | -0.557765253 | downregulated during regeneration - late |
| ENSDART00000141437 | sdcc2              | 0.0114147724 | 0.001568967  | 0.007072686  | -0.196613876 | -0.36025161  | downregulated during regeneration - late |
| ENSDART00000141487 | pvr13b             | 0.003733102  | -0.333456043 | -0.273917158 | -0.488003853 | -0.734425178 | downregulated during regeneration - late |
| ENSDART00000141671 | socs2              | 0.000634801  | -0.32177593  | -0.091083829 | -1.001751456 | -1.186845404 | downregulated during regeneration - late |
| ENSDART00000141920 | si:ch211-22410.4   | 0.059256345  | -1.330425532 | -0.617989075 | -0.986788428 | -0.796603249 | downregulated during regeneration - late |
| ENSDART00000142112 | vma21              | 0.030307206  | -0.082665202 | -0.082534524 | -0.180302218 | -0.34518071  | downregulated during regeneration - late |
| ENSDART00000142196 | fam167ab           | 0.003623005  | -0.920556961 | -0.832834787 | -1.167437341 | -1.267796279 | downregulated during regeneration - late |
| ENSDART00000142735 | si:ch211-13f8.1    | 0.003979354  | -0.324319655 | -0.241821619 | -0.588481479 | -0.554389586 | downregulated during regeneration - late |
| ENSDART00000142851 | itih6              | 0.001173341  | -0.217828277 | -0.246312318 | -4.361209214 | -4.055941297 | downregulated during regeneration - late |
| ENSDART00000143200 | kcnma1a            | 0.037170694  | -0.226894558 | -0.334282966 | -0.480968248 | -0.397036214 | downregulated during regeneration - late |
| ENSDART00000143840 | gstk1              | 0.026706504  | 0.057517576  | -0.140839441 | -0.201267582 | -0.834065155 | downregulated during regeneration - late |
| ENSDART00000144067 | cabp5a             | 0.012049052  | -0.477283062 | -0.255392436 | -0.467866686 | -0.403996112 | downregulated during regeneration - late |
| ENSDART00000145282 | sepp1a             | 0.000461528  | -0.462981641 | -0.396376841 | -0.662591735 | -0.921364004 | downregulated during regeneration - late |
| ENSDART00000145558 | si:ch211-23714.6   | 0.040053922  | -0.183280044 | -0.231325216 | -0.614649778 | -0.510830341 | downregulated during regeneration - late |
| ENSDART00000145762 | dnaaf1             | 0.000461528  | -0.407466904 | -0.372899622 | -0.590562671 | -0.565268948 | downregulated during regeneration - late |
| ENSDART00000146472 | kcnq4a             | 0.010687727  | -0.174962319 | -0.077658154 | -0.410630934 | -0.442662471 | downregulated during regeneration - late |
| ENSDART00000146892 | abcg2d             | 0.014710738  | -0.141142908 | -0.029073312 | -0.499348256 | -1.743973024 | downregulated during regeneration - late |
| ENSDART00000147068 | olfml2ba           | 0.013360877  | -0.192176717 | 0.036009408  | -0.274084705 | -0.587185898 | downregulated during regeneration - late |
| ENSDART00000147201 | slc5a7a            | 0.014511734  | -0.334790717 | -0.440092664 | -0.539424926 | -0.607892581 | downregulated during regeneration - late |
| ENSDART00000147582 | agmo               | 0.00862856   | -0.172065266 | -0.046434285 | -0.409289881 | -0.408628944 | downregulated during regeneration - late |
| ENSDART00000147854 | mfap5              | 2.23813E-05  | -0.362752481 | -0.424642186 | -0.795916329 | -0.74190928  | downregulated during regeneration - late |
| ENSDART00000148456 | abcb4              | 0.020586406  | -0.551564057 | -0.079040965 | -0.313501093 | -1.124934266 | downregulated during regeneration - late |
| ENSDART00000149222 | pglyrp2            | 0.005895019  | -0.019258678 | -0.204426336 | -0.652532049 | -2.674820692 | downregulated during regeneration - late |
| ENSDART00000149574 | ca14               | 0.025606413  | -0.121794187 | -0.18625006  | -0.561537732 | -0.325393218 | downregulated during regeneration - late |
| ENSDART00000149652 | AL928685.4         | 0.043205592  | -0.221690272 | -0.265792933 | -0.407449839 | -0.293257945 | downregulated during regeneration - late |
| ENSDART00000149659 | ezh1               | 0.003513906  | 0.045526141  | 0.005041587  | -0.251417621 | -0.327846848 | downregulated during regeneration - late |
| ENSDART00000149689 | mob1bb             | 0.002365371  | -0.2705299   | -0.18213785  | -0.463988827 | -0.361129298 | downregulated during regeneration - late |
| ENSDART00000149816 | hspb1              | 0.017271665  | -0.566005876 | -0.156876752 | -0.219080206 | -0.313669761 | downregulated during regeneration - late |
| ENSDART00000150386 | si:ch73-6k14.2     | 0.000164423  | -0.397499259 | -0.321996107 | -1.565555621 | -1.132350175 | downregulated during regeneration - late |
| ENSDART00000152068 | AL590149.1         | 0.016178224  | -0.322191556 | -0.083241136 | -0.42500156  | -0.283301232 | downregulated during regeneration - late |
| ENSDART00000152145 | si:ch211-20711.2   | 0.024547153  | -1.105453902 | -1.700204988 | -2.013950338 | -1.361589232 | downregulated during regeneration - late |
| ENSDART00000152253 | kcnj13             | 0.002332929  | -0.15334575  | -0.22735068  | -0.506366898 | -0.552648836 | downregulated during regeneration - late |
| ENSDART00000152942 | jcada              | 0.004739684  | -0.075928395 | -0.076278472 | -0.332447962 | -0.296311136 | downregulated during regeneration - late |
| ENSDART00000154141 | BX649398.2         | 0.000216813  | 0.278828233  | 0.21540553   | -0.861481785 | -0.785329833 | downregulated during regeneration - late |
| ENSDART00000155838 | luzp1              | 0.061460285  | -0.38633981  | -0.211709262 | -0.146984907 | -0.314685818 | downregulated during regeneration - late |
| ENSDART00000156256 | angpt4             | 0.024383427  | -0.447666401 | -0.531623063 | -0.584960614 | -0.899124282 | downregulated during regeneration - late |
| ENSDART00000156509 | fam150bb           | 0.026883176  | -0.200699582 | -0.03489316  | -0.310837396 | -0.503245808 | downregulated during regeneration - late |
| ENSDART00000157338 | gstz1              | 0.062825179  | -0.391223456 | -0.14748942  | -0.590184545 | -0.319150237 | downregulated during regeneration - late |
| ENSDART00000158260 | c1galt1a           | 0.000459643  | 0.184684125  | 0.138397385  | -0.286164045 | -0.509177074 | downregulated during regeneration - late |
| ENSDART00000159588 | rnf24              | 0.016665414  | -0.199572807 | -0.336306858 | -0.290748993 | -0.299485771 | downregulated during regeneration - late |
| ENSDART00000159752 | sort1a             | 0.002661298  | -0.095510148 | -0.060577332 | -0.362899297 | -0.357946523 | downregulated during regeneration - late |
| ENSDART00000159908 | camk1db            | 0.001174125  | -0.548571048 | -0.478436516 | -0.873630088 | -0.641909911 | downregulated during regeneration - late |
| ENSDART00000160305 | si:zfos-943e10.1   | 4.9299E-05   | -0.732433247 | -0.018482138 | -0.2347001   | -0.520119378 | downregulated during regeneration - late |

|                    |                   |             |              |              |              |              |                                          |
|--------------------|-------------------|-------------|--------------|--------------|--------------|--------------|------------------------------------------|
| ENSDART00000160425 | LAMP1             | 0.002170917 | -0.291224845 | -0.711008477 | -0.768820578 | -0.726430297 | downregulated during regeneration - late |
| ENSDART00000160431 | dhrs13l1          | 0.026954719 | -0.306310555 | -0.206975564 | -0.316329966 | -0.293060295 | downregulated during regeneration - late |
| ENSDART00000160707 | smx5              | 0.001677265 | -0.006041688 | -0.141079427 | -0.427667941 | -0.488718653 | downregulated during regeneration - late |
| ENSDART00000160829 | mhc1zda           | 0.014447102 | -0.410179214 | -0.276613879 | -0.418038837 | -0.322538004 | downregulated during regeneration - late |
| ENSDART00000160955 | slc38a3b          | 0.012986721 | -0.475545538 | -0.367921084 | -0.471714594 | -0.850494481 | downregulated during regeneration - late |
| ENSDART00000160956 | oaz1b             | 0.012598032 | -0.133855172 | -0.165932835 | -0.380106363 | -0.375655267 | downregulated during regeneration - late |
| ENSDART00000161525 | zgc:171704        | 0.000191101 | 0.267822787  | -0.368878081 | -1.0813007   | -1.211102226 | downregulated during regeneration - late |
| ENSDART00000161932 | npr3              | 0.00058454  | 0.255355781  | 0.183557252  | -0.357151542 | -1.063769364 | downregulated during regeneration - late |
| ENSDART00000162010 | zgc:92140         | 0.011458427 | -0.256831407 | -0.245054913 | -0.345912399 | -0.346929099 | downregulated during regeneration - late |
| ENSDART00000162359 | sorbs1            | 0.007620644 | -0.104497249 | -0.20837462  | -0.418151878 | -0.317718588 | downregulated during regeneration - late |
| ENSDART00000162564 | CT027980.1        | 0.000781831 | -0.351165538 | -0.178285414 | -0.533647461 | -0.500417084 | downregulated during regeneration - late |
| ENSDART00000162587 | chd5              | 0.003143898 | -0.534129477 | -1.024077887 | -0.70517204  | -0.958580386 | downregulated during regeneration - late |
| ENSDART00000163305 | fyxd6l            | 0.013876441 | -0.209100518 | -0.188713869 | -0.620315584 | -0.44198331  | downregulated during regeneration - late |
| ENSDART00000163394 | dgke              | 0.019521843 | -0.154264184 | -0.257555682 | -0.346312178 | -0.3002364   | downregulated during regeneration - late |
| ENSDART00000163565 | plcl2             | 0.005353377 | -0.007453137 | -0.119106713 | -0.251934099 | -0.322673112 | downregulated during regeneration - late |
| ENSDART00000164729 | SBSPON            | 0.014479917 | -0.213183167 | -0.151008123 | -0.380923154 | -0.573582751 | downregulated during regeneration - late |
| ENSDART00000164915 | fkbp3             | 0.030292962 | -0.300438451 | -0.318705984 | -0.287267966 | -0.464270989 | downregulated during regeneration - late |
| ENSDART00000165290 | cyb5a             | 0.002005251 | 0.19405994   | 0.064877953  | -0.350823438 | -0.576368917 | downregulated during regeneration - late |
| ENSDART00000165570 | rgs3a             | 0.01962183  | -0.252183908 | -0.25277418  | -0.390798302 | -0.347427277 | downregulated during regeneration - late |
| ENSDART00000166105 | frem1a            | 0.02305984  | -0.140882698 | -0.093532592 | -0.525495905 | -1.018483252 | downregulated during regeneration - late |
| ENSDART00000166449 | pik3r3a           | 0.049250284 | -0.698577911 | -0.3007013   | -0.248394691 | -0.547713549 | downregulated during regeneration - late |
| ENSDART00000166527 | ftr87             | 0.023542744 | -0.180960216 | -0.104077306 | -0.471569991 | -0.343688512 | downregulated during regeneration - late |
| ENSDART00000166829 | NA                | 0.030198325 | -0.799969413 | -0.359199835 | -0.712167572 | -2.039500454 | downregulated during regeneration - late |
| ENSDART00000167330 | CU179758.1        | 0.003900528 | -0.385159517 | -0.273959547 | -0.55992419  | -0.56237529  | downregulated during regeneration - late |
| ENSDART00000167506 | scg2a             | 0.003405768 | -0.457333464 | -0.29124415  | -0.144155502 | -0.510044484 | downregulated during regeneration - late |
| ENSDART00000167824 | timp4.3           | 0.01037926  | -0.389539203 | -0.013931581 | -0.399789503 | -0.590224284 | downregulated during regeneration - late |
| ENSDART00000167963 | nrg1              | 0.037106045 | -0.278608256 | -0.388339035 | -0.420420553 | -0.389329729 | downregulated during regeneration - late |
| ENSDART00000168201 | golim4a           | 0.009167687 | -0.134763119 | -0.005515007 | -0.245821925 | -1.172515705 | downregulated during regeneration - late |
| ENSDART00000168228 | tmem184a          | 0.016284951 | -0.3188994   | -0.465602708 | -0.713259634 | -0.580015552 | downregulated during regeneration - late |
| ENSDART00000168278 | si:ch211-276i12.4 | 0.002327436 | -0.631335043 | -0.270754342 | -0.641142033 | -0.623314164 | downregulated during regeneration - late |
| ENSDART00000168750 | smarca1           | 0.005353377 | -0.162085202 | -0.116464254 | -0.382463649 | -0.380530416 | downregulated during regeneration - late |
| ENSDART00000169228 | vat1l             | 0.00721984  | 0.089392965  | -0.09841303  | -0.250056266 | -0.442720544 | downregulated during regeneration - late |
| ENSDART00000169380 | slc25a43          | 0.005026727 | -0.226077688 | 0.088930874  | -0.355915914 | -0.508574161 | downregulated during regeneration - late |
| ENSDART00000170381 | CR855389.1        | 0.046578416 | -0.538290002 | -0.347216121 | -0.566215377 | -0.407287476 | downregulated during regeneration - late |
| ENSDART00000171006 | hpcal4            | 0.014069453 | -0.435402713 | -0.198074705 | -0.466665783 | -0.338540363 | downregulated during regeneration - late |
| ENSDART00000171417 | si:ch73-299h12.3  | 0.004952764 | -0.719381589 | -0.760232748 | -0.826233659 | -0.863901262 | downregulated during regeneration - late |
| ENSDART00000171815 | abcc8b            | 0.014959825 | 0.00284442   | -0.044162256 | -0.758748776 | -0.514944979 | downregulated during regeneration - late |
| ENSDART00000171824 | si:ch211-227e10.2 | 0.024734469 | -0.663768919 | -0.251157559 | -0.496668883 | -0.404241953 | downregulated during regeneration - late |
| ENSDART00000172019 | CU694219.1        | 0.010271025 | -0.358471879 | -0.088786066 | -0.423165049 | -1.570028426 | downregulated during regeneration - late |
| ENSDART00000172357 | tmem132a          | 0.051805764 | -0.246648072 | -0.102389273 | -0.224742481 | -0.519178406 | downregulated during regeneration - late |
| ENSDART00000172672 | angptl2b          | 0.010046682 | -0.321678324 | -0.001662718 | -0.330394771 | -0.841768465 | downregulated during regeneration - late |
| ENSDART00000173237 | mid2              | 0.032645202 | -0.115282743 | -0.310001722 | -0.367171215 | -0.341782639 | downregulated during regeneration - late |



Table S3. Ingenuity Pathway Analysis of temporally clustered, differentially expressed genes.

| Ingenuity Canonical Pathways                            | -log(p-value) | Ratio  | cluster                   | genes                                                                                                                                                                                                                                                      | collapsed pathways                      |
|---------------------------------------------------------|---------------|--------|---------------------------|------------------------------------------------------------------------------------------------------------------------------------------------------------------------------------------------------------------------------------------------------------|-----------------------------------------|
| EIF2 Signaling                                          | 23.8          | 0.163  | growth toward the midline | RPL36A, RPS27, RPS23, RPS18, RPL39, RPL2211, RPL35A, RPS4X, RPL7, RPS11, RPS28, RPS7, RPL35, MAP2K2, RPS13, UBA5A, RPS9, MRAS, RPL21, RPS17, RPL18, RPS24, RPL4, RPL30, RPL12, RPL23, RPS21, RPL10A, RPL27, RPL15, RPL8, PK3CB, RPS15A, RPS25, RPL38, RPSA | EIF2 Signaling                          |
| mTOR Signaling                                          | 12            | 0.114  | growth toward the midline | PRKCC, PLD3, RPS27, RHOC, RPS23, RPS18, RPS21, RPS4X, RPS11, RPS28, RPS7, HMOX1, RHOG, RPS13, PRKCD, RPS9, MRAS, RPS25, RPS15A, PIK3CB, RPS17, RPS24, RPSA                                                                                                 | mTOR Signaling                          |
| Regulation of eIF4 and p70S6K Signaling                 | 9.52          | 0.115  | growth toward the midline | RPS27, RPS23, RPS18, RPS21, RPS4X, RPS11, RPS28, RPS7, MAP2K2, RPS13, RPS9, MRAS, RPS25, PIK3CB, RPS15A, RPS17, RPS24, RPSA                                                                                                                                | mTOR Signaling                          |
| Phagosome Maturation                                    | 6.48          | 0.0946 | growth toward the midline | TUBB4B, TORG1, ATP6AP1, CTS2, CTSV, CTS5, ATP6V1H, TUBA8, NCF2, CTS8, CTS5, CTS6, NAPA, B, ET1L, ATP6V0E1                                                                                                                                                  | Phagosome Maturation                    |
| IL-8 Signaling                                          | 5.69          | 0.0761 | growth toward the midline | PRKCC, PLD3, RHOC, CSTB, BCL2L1, HMOX1, ITGAM, RHOG, MAP2K2, PRKCD, NCF2, ITGAV, MRAS, PIK3CB, MMP9                                                                                                                                                        | IL-8 Signaling                          |
| IL-3 Signaling                                          | 4             | 0.0964 | growth toward the midline | JAK1, PRKCC, MAP2K2, PRKCD, MRAS, PIK3CB, STAT3, JNPP5D                                                                                                                                                                                                    | IL-3 Signaling                          |
| EIF2 Signaling                                          | 9.84          | 0.0995 | midline crossing          | EIF2AK1, ATF3, EIF3H, RRAS, HRAS, TRIB3, EIF2S3, EIF2S1, EIF2S2, RPL9, EIF3M, EIF3F, RRAS2, EIF3B, EIF4A1, EIF3I, ATF4, RPL5, AGO1, RPS12, ACTC1, EIF3L                                                                                                    | EIF2 Signaling                          |
| Regulation of eIF4 and p70S6K Signaling                 | 9.15          | 0.115  | midline crossing          | EIF3H, RRAS, HRAS, EIF2S3, EIF2S1, MAPK11, EIF2S2, EIF4EBP1, EIF3M, EIF3F, RRAS2, EIF3B, EIF4A1, MKNK1, EIF3I, RPS12, AGO1, EIF3L                                                                                                                          | mTOR Signaling                          |
| Germ Cell-Sertoli Cell Junction Signaling               | 7.65          | 0.0983 | midline crossing          | SRC, RRAS, TUBB4B, RAC1, ITGA6, ILK, TUBA4A, MAPK9, HRAS, GSN, LIMK1, RRAS2, TUBA3E, JUP, ACTC1, ACTG1, CTNND1                                                                                                                                             | RAS/MAPK signaling                      |
| Aggrin Interactions at Neuromuscular Junction           | 7.31          | 0.159  | midline crossing          | SRC, RRAS2, JUN, RRAS, RAC1, ITGA6, MAPK9, HRAS, ACTC1, ACTG1, ITGB3                                                                                                                                                                                       | aggrin interactions                     |
| Virus Entry via Endocytic Pathways                      | 6.93          | 0.118  | midline crossing          | SRC, AP2M1, RRAS, HLA-B, ITGA6, ABL1, RAC1, HRAS, ITGB3, RRAS2, FLNC, ACTC1, ACTG1                                                                                                                                                                         | endocytic pathways                      |
| Integrin Signaling                                      | 6.87          | 0.0822 | midline crossing          | RAP2B, RAPGEF1, SRC, RRAS, ARF1, RAC1, ITGA6, ILK, ABL1, HRAS, TNK2, GSN, ITGB3, CAPN1, RRAS2, ACTC1, ACTG1, MYL12A                                                                                                                                        | integrin signaling                      |
| Epithelial Adherens Junction Signaling                  | 6.28          | 0.0959 | midline crossing          | SRC, RAPGEF1, MYL6, RRAS, TUBB4B, RAC1, TUBA4A, HRAS, RRAS2, JUP, TUBA3E, ACTC1, A, CTG1, CTNND1                                                                                                                                                           | adhesive junctions                      |
| Sertoli Cell-Sertoli Cell Junction Signaling            | 5.96          | 0.0843 | midline crossing          | SRC, RRAS, TUBB4B, RAC1, ILK, TUBA4A, MAPK9, HRAS, MAPK11, JUN, RRAS2, JUP, TUBA3E, ACTC1, ACTG1                                                                                                                                                           | adhesive junctions                      |
| Paxillin Signaling                                      | 5.93          | 0.106  | midline crossing          | SRC, RRAS2, RRAS, ARF1, RAC1, ITGA6, MAPK9, HRAS, MAPK11, ACTC1, ACTG1, ITGB3                                                                                                                                                                              | adhesive junctions                      |
| Estrogen-Dependent Breast Cancer Signaling              | 5.69          | 0.125  | midline crossing          | SRC, RRAS2, JUN, RRAS, CREB3, DHR511, HSD17B7, HRAS, ATF1, STAT5B                                                                                                                                                                                          | RAS/MAPK signaling                      |
| Molecular Mechanisms of Cancer                          | 5.36          | 0.0558 | midline crossing          | RAP2B, RAPGEF1, SRC, ARHGEF4, RRAS, RAC1, APAF1, MAD1, MAPK9, HRAS, BAX, E2F3, MAPK11, FAS, RB1, JUN, RRAS2, CASP9, NFKBIA, ARHGEF2, SMAD1, CTNND1                                                                                                         | RAS/MAPK signaling                      |
| Remodeling of Epithelial Adherens Junctions             | 5.33          | 0.13   | midline crossing          | SRC, NME1, TUBB4B, MAPRE1, TUBA4A, TUBA3E, ACTC1, ACTG1, CTNND1                                                                                                                                                                                            | adhesive junctions                      |
| Prostate Cancer Signaling                               | 4.93          | 0.103  | midline crossing          | RB1, NFKBIA, CASP9, RRAS2, HSP90AB1, RRAS, CREB3, ABL1, HRAS, ATF4                                                                                                                                                                                         | RAS/MAPK signaling                      |
| UV-C-Induced MAPK Signaling                             | 4.91          | 0.163  | midline crossing          | SRC, RRAS2, JUN, RRAS, MAPK9, HRAS, MAPK11                                                                                                                                                                                                                 | RAS/MAPK signaling                      |
| NRF2-mediated Oxidative Stress Response                 | 4.85          | 0.0725 | midline crossing          | USP14, RRAS, PRDX1, MAPK9, HRAS, DNAJC21, JUN, RRAS2, VCP, ATF4, TXN, FKBP5, ACTC1, ACTG1                                                                                                                                                                  | NRF2-mediated Oxidative Stress Response |
| Role of Tissue Factor in Cancer                         | 4.73          | 0.0887 | midline crossing          | SRC, RRAS2, RRAS, RAC1, ITGA6, HRAS, STAT5B, MAPK11, F3, ITGB3, LIMK1                                                                                                                                                                                      | RAS/MAPK signaling                      |
| mTOR Signaling                                          | 4.65          | 0.0697 | midline crossing          | EIF3H, RRAS, RAC1, FKBP1A, HRAS, EIF4EBP1, EIF3M, EIF3F, RRAS2, EIF3B, EIF4A1, EIF3I, RPS12, EIF3L                                                                                                                                                         | mTOR Signaling                          |
| Apoptosis Signaling                                     | 4.38          | 0.1    | midline crossing          | CAPNS1, NFKBIA, CASP9, RRAS2, RRAS, APAF1, HRAS, BAX, FAS                                                                                                                                                                                                  | apoptosis signaling                     |
| Myc Mediated Apoptosis Signaling                        | 4.38          | 0.114  | midline crossing          | CASP9, RRAS2, RRAS, APAF1, MAPK9, HRAS, BAX, FAS                                                                                                                                                                                                           | apoptosis signaling                     |
| Caveolar-mediated Endocytosis Signaling                 | 4.33          | 0.113  | midline crossing          | SRC, FLNC, HLA-B, ITGA6, ABL1, ACTC1, ACTG1, ITGB3                                                                                                                                                                                                         | endocytic pathways                      |
| Death Receptor Signaling                                | 4.27          | 0.0968 | midline crossing          | NFKBIA, CASP9, APAF1, PARP8, PARP12, ACTC1, ACTG1, FAS, LIMK1                                                                                                                                                                                              | apoptosis signaling                     |
| tRNA Charging                                           | 4.14          | 0.154  | midline crossing          | RRAS, GARS, TAR5, SARS, JARS, OARS                                                                                                                                                                                                                         | tRNA Charging                           |
| ILK Signaling                                           | 4.12          | 0.066  | midline crossing          | FN1, MYL6, FERMT2, CREB3, ILK, MAPK9, ITGB3, JUN, FLNC, ATF4, RSU1, ACTC1, ACTG1                                                                                                                                                                           | integrin signaling                      |
| ATM Signaling                                           | 4.09          | 0.0918 | midline crossing          | NFKBIA, GADD45B, JUN, CREB3, ABL1, MAPK9, ATF4, TOP1, MAPK11                                                                                                                                                                                               | ATM Signaling                           |
| Superpathway of Cholesterol Biosynthesis                | 13.1          | 0.393  | target selection          | MVD, SQLE, EBP, ACAT2, DHCR24, HSD17B7, MSMO1, TM7SF2, HMGCS1, SCD5, CYP51A1                                                                                                                                                                               | cholesterol biosynthesis                |
| Cholesterol Biosynthesis I                              | 11.7          | 0.615  | target selection          | SQLE, EBP, DHCR24, HSD17B7, MSMO1, TM7SF2, SCD5, CYP51A1                                                                                                                                                                                                   | cholesterol biosynthesis                |
| Cholesterol Biosynthesis II (via 24,25-dihydroxysterol) | 11.7          | 0.615  | target selection          | SQLE, EBP, DHCR24, HSD17B7, MSMO1, TM7SF2, SCD5, CYP51A1                                                                                                                                                                                                   | cholesterol biosynthesis                |
| Cholesterol Biosynthesis III (via Desmosterol)          | 11.7          | 0.615  | target selection          | SQLE, EBP, DHCR24, HSD17B7, MSMO1, TM7SF2, SCD5, CYP51A1                                                                                                                                                                                                   | cholesterol biosynthesis                |
| Actin Cytoskeleton Signaling                            | 9.06          | 0.0837 | target selection          | MYH4, FN1, SOS2, HRAS, FGD1, MYH7, BCAR1, RAC3, SSH1, APC, PIK3R3, SHC1, PAK1, CYFIP2, FGF18, PAK2, ARHGAP35, ACTC1, MYL3                                                                                                                                  | actin cytoskeleton signaling            |
| Breast Cancer Regulation by Stathmin1                   | 8.94          | 0.0878 | target selection          | TUBA1B, PPP2R5B, SOS2, TUBB2A, TUBA4A, HRAS, TUBB, PPP1R14B, TUBB2B, PIK3R3, SHC1, PPP2CB, PAK1, CAMK2D, TUBA1A, GNB2, TUBA1C, PPP2R1B                                                                                                                     | axon guidance                           |
| Axonal Guidance Signaling                               | 8.59          | 0.0574 | target selection          | TUBA1B, PLXNA3, NRP2, BMP3, SOS2, TUBB2A, TUBA4A, ADAM22, HRAS, L1CAM, DPYSL5, TUBB, BCAR1, RAC3, TUBB2B, PIK3R3, SHC1, PAK1, EPHB1, TUBA1A, PAK2, GNB2, SRGAP2, TUBA1C, MYL3, NRP1                                                                        | axon guidance                           |
| Epithelial Adherens Junction Signaling                  | 7.57          | 0.0959 | target selection          | MYH4, TUBA1B, TUBB2A, TUBA4A, HRAS, MYH7, TUBB, APC, TUBB2B, TUBA1A, TGFβ2, TUBA1C, ACTC1, MYL3                                                                                                                                                            | adhesive junctions                      |
| Germ Cell-Sertoli Cell Junction Signaling               | 7.47          | 0.0867 | target selection          | TUBA1B, TUBB2A, TUBA4A, HRAS, TUBB, RAC3, BCAR1, TUBB2B, PIK3R3, PAK1, TUBA1A, PAK2, TGFβ2, TUBA1C, ACTC1                                                                                                                                                  | adhesive junctions                      |
| Remodeling of Epithelial Adherens Junctions             | 7.27          | 0.145  | target selection          | TUBA1B, TUBA1A, TUBB2A, TUBA4A, TUBA1C, TUBB, ACTC1, APC, TUBB2B, Mapre2                                                                                                                                                                                   | adhesive junctions                      |
| 14-3-3-mediated Signaling                               | 6.35          | 0.0916 | target selection          | PIK3R3, TUBA1B, CBL, TUBA1A, YWHAH, TUBB2A, TUBA4A, HRAS, VIM, TUBA1C, TUBB, TUBB2B                                                                                                                                                                        | 14-3-3-mediated signaling               |
| Zymosterol Biosynthesis                                 | 6.21          | 0.667  | target selection          | HSD17B7, MSMO1, TM7SF2, CYP51A1                                                                                                                                                                                                                            | cholesterol biosynthesis                |
| ERK/MAPK Signaling                                      | 5.88          | 0.07   | target selection          | YWHAH, PPP2R5B, SOS2, HRAS, PPP1R14B, RAC3, BCAR1, PIK3R3, SHC1, PPP2CB, PAK1, PAK2, STAT1, PPP2R1B                                                                                                                                                        | ERK/MAPK signaling                      |
| Gap Junction Signaling                                  | 5.27          | 0.0667 | target selection          | PIK3R3, CSNK1E, TUBA1B, DBN1, TUBA1A, TUBB2A, SOS2, TUBA4A, HRAS, TUBA1C, TUBB, ACTC1, TUBB2B                                                                                                                                                              | gap junction signaling                  |
| Phagosome Maturation                                    | 4.99          | 0.0743 | target selection          | DYNC1H1, TUBA1B, Dync1i2, TUBA1A, VPS33A, DYNC1i1, TUBB2A, TUBA4A, TUBA1C, TUBB, TUBB2B                                                                                                                                                                    | phagosome maturation                    |
| PI3K/AKT Signaling                                      | 4.86          | 0.08   | target selection          | PIK3R3, SHC1, RPS6KB1, PPP2CB, NFKBIA, YWHAH, SOS2, PPP2R5B, HRAS, PPP2R1B                                                                                                                                                                                 | PI3/AKT signaling                       |
| PTEN Signaling                                          | 4.24          | 0.0756 | target selection          | PIK3R3, SHC1, RPS6KB1, CBL, YWHAH, SOS2, HRAS, BCAR1, RAC3                                                                                                                                                                                                 | PTEN signaling                          |
| Integrin Signaling                                      | 4.07          | 0.0548 | target selection          | PIK3R3, SHC1, PAK1, ARF3, PAK2, SOS2, RALB, HRAS, ITGA10, BCAR1, ACTC1, RAC3                                                                                                                                                                               | integrin signaling                      |
| Ephrin B Signaling                                      | 4.06          | 0.0959 | target selection          | EPHB1, PAK1, CBL, ABL1, GNB2, HRAS, RAC3                                                                                                                                                                                                                   | ephrin B signaling                      |
| Glutamate Receptor Signaling                            | 12.2          | 0.263  | brain innervation         | GRIN1, GRM2, GRIN2A, GRM8, GRM1, SLC1A1, GRIP1, HOMER3, GRM4, GNB1, GRM6, SLC1A2, HOMER1, GRIA3, GRIK1                                                                                                                                                     | glutamate receptor signaling            |
| Synaptic Long Term Depression                           | 8.98          | 0.115  | brain innervation         | GRM2, CACNA2D2, GUCY1A1, GRM8, GRM1, RYR2, CACNA1H, CACNB3, GRM4, GNA2, CACNG3, IGF1, GNAO1, PPM1L, RYR3, GRM6, PRKCE, PPP2R2C, CACNB2, GRIA3                                                                                                              | synaptic LTD                            |
| Calcium Signaling                                       | 8.44          | 0.102  | brain innervation         | RAP2A, GRIN1, GRIN2A, CACNA2D2, CHRNA6, RYR2, MEF2A, SLC8A3, CACNA1H, SLC8A2, CACNB3, ATP2B2, CACNG3, ATP2B3, RYR3, CACNB2, CHRN3, SLC8A1, PPP3CA, GRIA3, GRIK1                                                                                            | calcium signaling                       |
| CREB Signaling in Neurons                               | 8.22          | 0.0991 | brain innervation         | GRIN1, ADCY2, GRIN2A, GRM2, CACNA2D2, GRM8, GRM1, CACNA1H, GNG13, CACNB3, GRM4, GNA2, PIK3R3, GNB1, CACNG3, GNAO1, GRM6, PRKCE, CACNB2, GRIK1, GRIA3                                                                                                       | CREB signaling                          |
| GABA Receptor Signaling                                 | 7.85          | 0.147  | brain innervation         | GABRA5, ADCY2, CACNA2D2, CACNA1H, GABBR1, GPHN, CACNB3, CACNG3, DNMI1, NSF, GABBR2, GABRB1, CACNB2, GABRA2                                                                                                                                                 | GABA receptor signaling                 |
| Opioid Signaling Pathway                                | 6.52          | 0.0823 | brain innervation         | GRIN1, ADCY2, GRIN2A, CACNA2D2, RYR2, RGS7, CACNA1H, CACNB3, RGS6, RAC3, SLC12A5, GNB1, CACNG3, ARR1, GNAO1, RYR3, PRKCE, RGS11, CACNB2, PPP3CA                                                                                                            | opioid signaling                        |
| Axonal Guidance Signaling                               | 6.25          | 0.0618 | brain innervation         | EPHB2, GNG13, SEMA6B, ADAM11, PLXNA2, GNB1, EPHB6, NTNG1, IGF1, NTNG2, UNC5D, PRKCE, ADAM23, TUBB4A, ROBO2, PPP3CA, EFNA2, SLIT2, GNA2, ROBO3, RAC3, PIK3R3, SEMA3A, EPHA6, ADAM12, WNT10A, GNAO1, LINGO1                                                  | axon guidance                           |
| Netrin Signaling                                        | 5.96          | 0.154  | brain innervation         | CACNG3, CACNA2D2, RYR2, RYR3, CACNA1H, UNC5D, CACNB2, CACNB3, RAC3, PPP3CA                                                                                                                                                                                 | netrin signaling                        |
| Role of NFAT in Cardiac Hypertrophy                     | 4.69          | 0.0731 | brain innervation         | ADCY2, CACNA2D2, MEF2A, CACNA1H, SLC8A3, GNG13, SLC8A2, CACNB3, PIK3R3, GNB1, CACNG3, IGF1, PRKCE, CACNB2, SLC8A1, PPP3CA                                                                                                                                  | NFAT signaling                          |
| nNOS Signaling in Skeletal Muscle Cells                 | 4.64          | 0.171  | brain innervation         | CACNG3, CACNA2D2, RYR2, RYR3, CACNA1H, CACNB2, CACNB3                                                                                                                                                                                                      | nNOS signaling                          |
| Chondroitin Sulfate Biosynthesis                        | 4.57          | 0.14   | brain innervation         | CHST1, SULF4A1, XYL1T1, HS3ST2, B3GAT1, HS6ST3, HS3ST4, B3GAT2                                                                                                                                                                                             | glycosaminoglycan biosynthesis          |
| G Beta Gamma Signaling                                  | 4.48          | 0.0965 | brain innervation         | CACNG3, GNB1, ADCY2, CACNA2D2, GNAO1, CACNA1H, GNG13, PRKCE, CACNB2, CACNB3, GNA2                                                                                                                                                                          | GPCR signaling                          |
| Dermatan Sulfate Biosynthesis                           | 4.46          | 0.136  | brain innervation         | CHST1, SULF4A1, XYL1T1, HS3ST2, B3GAT1, HS6ST3, HS3ST4, B3GAT2                                                                                                                                                                                             | glycosaminoglycan biosynthesis          |
| Gai Signaling                                           | 4.28          | 0.0917 | brain innervation         | GNB1, GABBR2, ADCY2, GRM2, ADRA2A, GRM8, RGS7, GRM6, GNG13, GABBR1, GRM4                                                                                                                                                                                   | GPCR signaling                          |
| α-Adrenergic Signaling                                  | 4             | 0.103  | brain innervation         | GNB1, ADCY2, GYS1, ADRA2A, SLC8A3, GNG13, PRKCE, SLC8A2, SLC8A1                                                                                                                                                                                            | adrenergic signaling                    |

|                                                         |      |        |                                           |                                                                                                                                                                                                                                  |                                           |
|---------------------------------------------------------|------|--------|-------------------------------------------|----------------------------------------------------------------------------------------------------------------------------------------------------------------------------------------------------------------------------------|-------------------------------------------|
| GABA Receptor Signaling                                 | 17.8 | 0.242  | downregulated during regeneration - early | CACNA1G, CACNA11, CACNG6, SLC32A1, AP2A1, CACNA1D, ADCY3, GABBR1, GABRB2, CACNG2, GAD2, GABRG2, GPR37, GABRG1, CACNA1B, GABRA6, SLC6A1, CACNG7, CACNB2, GABRA1, CACNG8, GABRD, CACNA2D4                                          | GABA receptor signaling                   |
| Opioid Signaling Pathway                                | 13.6 | 0.119  | downregulated during regeneration - early | CACNA11, AP2A1, CAMK4, SLC12A5, CACNG2, GNB3, CAMK2A, PPP3R1, CACNG7, CACNB2, CACNG8, CACNA2D4, PRKD1, PPP3CA, CACNA1G, GRIN1, CACNG6, CACNA1D, ADCY3, RPS6K A5, NPBWWR2, FOSB, CACNA1B, KCNJ5, KCNJ9, PENK, RGS8, KCNJ6, CAMK2G | opioid signaling                          |
| Calcium Signaling                                       | 12.8 | 0.126  | downregulated during regeneration - early | CACNA11, CAMK4, ATP2B1, GRIA1, CACNG2, CAMK2A, PPP3R1, CACNG7, CACNB2, CACNG8, CACNA2D4, PPP3CA, CACNA1G, CACNG6, GRIN1, CACNA1D, TRPC1, CHRNA10, CACNA1B, ATP2B3, MEF2D, CAMK1, RCAN3, SLC8A1, GRIA3, CAMK2G                    | calcium signaling                         |
| Role of NFAT in Cardiac Hypertrophy                     | 10.6 | 0.11   | downregulated during regeneration - early | CACNA1G, CACNA11, CACNG6, CACNA1D, CAMK4, ADCY3, PLCH1, CACNG2, CAMK2A, GNB3, CACNA1B, MEF2D, PPP3R1, IGF1R, CACNG7, RCAN3, IRS2, CACNB2, CACNG8, SLC8A1, CACNA2D4, PRKD1, PPP3CA, CAMK2G                                        | NFAT signaling                            |
| CREB Signaling in Neurons                               | 10.1 | 0.108  | downregulated during regeneration - early | CACNA1G, CACNA11, CACNG6, GRIN1, CACNA1D, CAMK4, GRID2, GRIA1, ADCY3, PLCH1, CACNG2, GNB3, CAMK2A, GRIK4, CACNA1B, CACNG7, IRS2, CACNB2, CACNG8, CACNA2D4, PRKD1, CAMK2G, GRIA3                                                  | CREB signaling                            |
| nNOS Signaling in Skeletal Muscle Cells                 | 9.36 | 0.268  | downregulated during regeneration - early | CACNA11, CACNA1G, CACNG2, CACNG6, CACNA1D, CAMK4, CACNA1B, CACNG7, CACNB2, CACNG8, CACNA2D4                                                                                                                                      | nNOS signaling                            |
| Dopamine-DARPP32 Feedback in cAMP Signaling             | 8.9  | 0.116  | downregulated during regeneration - early | KCNJ12, GRIN1, CACNA1D, CAMK4, PPP1R3C, ADCY3, DRD2, PLCH1, KCNJ11, DRD1, KCNJ14, KCNJ5, PPP3R1, CAMK1, KCNJ9, DRD4, KCNJ6, PRKD1, PPP3CA                                                                                        | dopamine signaling                        |
| Corticotropin Releasing Hormone Signaling               | 8.39 | 0.122  | downregulated during regeneration - early | CACNA1G, CACNA11, CACNG6, CACNA1D, CAMK4, GUCY2D, ADCY3, CRH, CACNG2, CACNA1B, MEF2D, NR4A1, CACNG7, CACNB2, CACNG8, CACNA2D4, PRKD1                                                                                             | corticotropin-releasing hormone signaling |
| Netrin Signaling                                        | 8.14 | 0.185  | downregulated during regeneration - early | CACNA11, CACNA1G, CACNG2, CACNG6, CACNA1D, CACNA1B, PPP3R1, CACNG7, CACNB2, CACNG8, CACNA2D4, PPP3CA                                                                                                                             | netrin signaling                          |
| G Beta Gamma Signaling                                  | 7.91 | 0.132  | downregulated during regeneration - early | CACNA11, CACNA1G, CACNG6, CACNA1D, CACNG2, GNB3, CACNA1B, KCNJ5, KCNJ9, CACNG7, CACNB2, KCNJ6, CACNG8, CACNA2D4, PRKD1                                                                                                           | GPCR signaling                            |
| Synaptic Long Term Depression                           | 7.68 | 0.103  | downregulated during regeneration - early | CACNA1G, CACNA11, CACNG6, CACNA1D, GUCY2D, GRID2, GRIA1, CRH, PLCH1, CACNG2, CACNA1B, IGF1R, CACNG7, CACNB2, CACNG8, CACNA2D4, PRKD1, GRIA3                                                                                      | synaptic LTD                              |
| GNRH Signaling                                          | 7.26 | 0.103  | downregulated during regeneration - early | CACNA1G, CACNA11, CACNG6, CACNA1D, CAMK4, MAP3K13, ADCY3, CACNG2, GNB3, CAMK2A, CACNA1B, CACNG7, CACNB2, CACNG8, CACNA2D4, PRKD1, CAMK2G                                                                                         | GNRH signaling                            |
| CCR5 Signaling in Macrophages                           | 7.14 | 0.137  | downregulated during regeneration - early | CACNA11, CACNA1G, CACNG6, CACNA1D, CAMK4, CACNG2, GNB3, CACNA1B, CACNG7, CACNB2, CACNG8, CACNA2D4, PRKD1                                                                                                                         | CCR5 signaling                            |
| GPCR-Mediated Nutrient Sensing in Enteroendocrine Cells | 7.14 | 0.125  | downregulated during regeneration - early | CACNA11, CACNA1G, CACNG6, CACNA1D, ADCY3, RAPGEF4, PLCH1, CACNG2, CACNA1B, CACNG7, CACNB2, CACNG8, CACNA2D4, PRKD1                                                                                                               | GPCR signaling                            |
| PKCβ Signaling in T Lymphocytes                         | 6.73 | 0.101  | downregulated during regeneration - early | CACNA1G, CACNA11, CACNG6, CACNA1D, MAP3K13, CACNG2, CAMK2A, CACNA1B, PPP3R1, CACNG7, IRS2, CACNB2, CACNG8, CACNA2D4, PPP3CA, CAMK2G                                                                                              |                                           |
| FcγRIIB Signaling in B Lymphocytes                      | 6.21 | 0.139  | downregulated during regeneration - early | CACNA11, CACNA1G, CACNG2, CACNG6, CACNA1D, CACNA1B, CACNG7, CACNB2, IRS2, CACNG8, CACNA2D4                                                                                                                                       |                                           |
| Type II Diabetes Mellitus Signaling                     | 5.44 | 0.0909 | downregulated during regeneration - early | CACNA1G, CACNG2, CACNA11, CACNG6, CACNA1D, PRKAB1, CACNA1B, CACNG7, CACNB2, IRS2, CACNG8, CACNA2D4, PRKD1, KCNJ11                                                                                                                |                                           |
| Androgen Signaling                                      | 5.29 | 0.0949 | downregulated during regeneration - early | CACNA11, CACNA1G, CACNG6, CACNA1D, CAMK4, CACNG2, GNB3, CACNA1B, CACNG7, CACNB2, CACNG8, CACNA2D4, PRKD1                                                                                                                         |                                           |
| Gap Junction Signaling                                  | 4.89 | 0.0769 | downregulated during regeneration - early | TJP2, GUCY2D, GRIA1, ADCY3, GJA9, DRD2, GJCI, PLCH1, LPAR1, DRD1, PPP3R1, IRS2, PRKD1, PPP3CA, GRIA3                                                                                                                             | gap junction signaling                    |
| Glutamate Receptor Signaling                            | 4.7  | 0.14   | downregulated during regeneration - early | GRIN1, CAMK2A, GNB3, GRIK4, SLC17A7, GRID2, GRIA1, GRIA3                                                                                                                                                                         | glutamate receptor signaling              |
| Synaptic Long Term Potentiation                         | 4.36 | 0.0902 | downregulated during regeneration - early | GRIN1, CAMK2A, CAMK4, GRIA1, PPP1R3C, PPP3R1, PLCH1, PPP3CA, PRKD1, CAMK2G, GRIA3                                                                                                                                                | synaptic LTD                              |
| cAMP-mediated signaling                                 | 4.1  | 0.0658 | downregulated during regeneration - early | CAMK4, VIPR2, CHRM4, ADCY3, GABBR1, RAPGEF4, DRD2, CHRM5, CAMK2A, LPAR1, DRD1, PPP3R1, DRD4, PPP3CA, CAMK2G                                                                                                                      | cAMP-mediated signaling                   |
| Gustation Pathway                                       | 4.08 | 0.0779 | downregulated during regeneration - early | CACNA11, CACNA1G, CACNG2, CACNG6, CACNA1D, GNB3, CACNA1B, ADCY3, CACNG7, CACNB2, CACNG8, CACNA2D4                                                                                                                                |                                           |
| Cellular Effects of Sildenafil (Viagra)                 | 4.08 | 0.084  | downregulated during regeneration - early | SLC4A5, CACNG2, CACNG6, CACNA1D, CAMK4, GPR37, GUCY2D, ADCY3, CACNG7, CACNG8, PLCH1                                                                                                                                              |                                           |
| Neuroinflammation Signaling Pathway                     | 4.08 | 0.0579 | downregulated during regeneration - early | GRIN1, GRIA1, GABBR1, GABRB2, GAD2, GABRG2, GABRG1, KCNJ5, PPP3R1, GABRA6, KCNJ9, SLC6A1, TLR7, IRS2, KCNJ6, GABRA1, GABRD, PPP3CA                                                                                               | neuroinflammation signaling               |
| Phototransduction Pathway                               | 4.74 | 0.132  | downregulated during regeneration - late  | PRKACB, GNB5, GUCY2F, SAG, RGS9BP, GNGT2, PDE6D                                                                                                                                                                                  | phototransduction                         |

Table S4. Differentially accessible sequences with distance to nearest annotated genes and nearest differentially-expressed genes.

| new_seqnames            | chr   | start    | end      | width | overall_distance | overall_gene      | overall_DE_distance | overall_DE_gene | timepoint                   |
|-------------------------|-------|----------|----------|-------|------------------|-------------------|---------------------|-----------------|-----------------------------|
| chr1:27509-28008        | chr1  | 27509    | 28008    | 500   | 70               | esd               | 15791               | cap97           | differentially open at 2dpi |
| chr1:185007-185506      | chr1  | 185007   | 185506   | 500   | 11536            | grtp1a            | -79577              | cenpe           | differentially open at 2dpi |
| chr1:58446298-58446797  | chr1  | 58446298 | 58446797 | 500   | -7231            | ipar2b            | 133113              | mfap4           | differentially open at 2dpi |
| chr1:58479677-58480176  | chr1  | 58479677 | 58480176 | 500   | -8               | humpd1            | 166491              | mfap4           | differentially open at 2dpi |
| chr1:58542861-58543360  | chr1  | 58542861 | 58543360 | 500   | 1938             | cilm2b            | 229675              | mfap4           | differentially open at 2dpi |
| chr1:58608084-58608583  | chr1  | 58608084 | 58608583 | 500   | 104              | nam               | 294899              | mfap4           | differentially open at 2dpi |
| chr2:51352621-51353120  | chr2  | 51352621 | 51353120 | 500   | 2                | h67               | 698402              | dad1            | differentially open at 2dpi |
| chr2:52763439-52764389  | chr2  | 52763439 | 52764389 | 951   | 28200            | nie2c             | -336627             | scn12aa         | differentially open at 2dpi |
| chr2:54965275-54965774  | chr2  | 54965275 | 54965774 | 500   | -970             | ankrd12           | -56216              | acss21          | differentially open at 2dpi |
| chr2:56491466-56491965  | chr2  | 56491466 | 56491965 | 500   | 40208            | gp4b              | 40208               | gp4b            | differentially open at 2dpi |
| chr3:52202-52701        | chr3  | 52202    | 52701    | 500   | -30528           | mhc1zfa           | -3902825            | pilb1           | differentially open at 2dpi |
| chr3:1454919-1455418    | chr3  | 1454919  | 1455418  | 500   | -7               | wbp2nl            | -2500109            | pilb1           | differentially open at 2dpi |
| chr3:1463472-1463971    | chr3  | 1463472  | 1463971  | 500   | 8547             | wbp2nl            | -2491555            | pilb1           | differentially open at 2dpi |
| chr3:4122604-4123103    | chr3  | 4122604  | 4123103  | 500   | 128600           | art4              | 167577              | pilb1           | differentially open at 2dpi |
| chr3:4123577-4124076    | chr3  | 4123577  | 4124076  | 500   | 129572           | art4              | 168549              | pilb1           | differentially open at 2dpi |
| chr3:5139540-5140039    | chr3  | 5139540  | 5140039  | 500   | 17995            | tefb              | 227365              | txn2            | differentially open at 2dpi |
| chr3:11625609-11626108  | chr3  | 11625609 | 11626108 | 500   | 32071            | hifa              | -7.76E+05           | ccnf            | differentially open at 2dpi |
| chr3:32328635-32329134  | chr3  | 32328635 | 32329134 | 500   | -32035           | trpm4a            | 49820               | mas             | differentially open at 2dpi |
| chr3:36970639-36971138  | chr3  | 36970639 | 36971138 | 500   | 32               | psmc3ip           | 673091              | baxa            | differentially open at 2dpi |
| chr3:38598193-38598692  | chr3  | 38598193 | 38598692 | 500   | 175698           | sidkey-106c17.2   | -8.28E+05           | aldoaa          | differentially open at 2dpi |
| chr3:55222028-55222527  | chr3  | 55222028 | 55222527 | 500   | -1291            | sidkey-188h10.3   | -483963             | rhdbf1a         | differentially open at 2dpi |
| chr3:5595907-55959406   | chr3  | 5595907  | 55959406 | 500   | -40111           | sr1               | -511125             | rac1b           | differentially open at 2dpi |
| chr3:57474388-57474887  | chr3  | 57474388 | 57474887 | 500   | -14839           | cyth1a            | -14839              | cyth1a          | differentially open at 2dpi |
| chr3:59285313-59285812  | chr3  | 59285313 | 59285812 | 500   | -106203          | npbt1             | -106203             | npbt1           | differentially open at 2dpi |
| chr3:60369415-60369914  | chr3  | 60369415 | 60369914 | 500   | -4502            | anks4b            | -4502               | anks4b          | differentially open at 2dpi |
| chr3:61682115-61682614  | chr3  | 61682115 | 61682614 | 500   | 168342           | sreb1             | 168342              | sreb1           | differentially open at 2dpi |
| chr4:9945910-9946409    | chr4  | 9945910  | 9946409  | 500   | 35542            | sb1               | 35542               | sb1             | differentially open at 2dpi |
| chr4:68244163-68245059  | chr4  | 68244163 | 68245059 | 897   | 407814           | znf1117           | -40932543           | fam19a5a        | differentially open at 2dpi |
| chr5:1090761-1091632    | chr5  | 1090761  | 1091632  | 872   | 11308            | mbd2              | -608799             | dhx33           | differentially open at 2dpi |
| chr5:11919877-11920376  | chr5  | 11919877 | 11920376 | 500   | -95059           | zgc:171242        | 104502              | ksr2            | differentially open at 2dpi |
| chr5:37564957-37565456  | chr5  | 37564957 | 37565456 | 500   | -10354           | guoy2d            | 79835               | slc12a9         | differentially open at 2dpi |
| chr5:37904932-37905431  | chr5  | 37904932 | 37905431 | 500   | 1646             | atp1b2b           | -260141             | slc12a9         | differentially open at 2dpi |
| chr5:50861109-50861608  | chr5  | 50861109 | 50861608 | 500   | 64942            | rasgf2b           | 323059              | homert1b        | differentially open at 2dpi |
| chr5:52934307-52934806  | chr5  | 52934307 | 52934806 | 500   | -354             | taf6              | 1157357             | ccnb1           | differentially open at 2dpi |
| chr5:53882442-53882941  | chr5  | 53882442 | 53882941 | 500   | 25298            | ssna1             | 209221              | ccnb1           | differentially open at 2dpi |
| chr5:64184151-64184650  | chr5  | 64184151 | 64184650 | 500   | -43              | si:ch211-236k19.4 | 8691                | zgc:101858      | differentially open at 2dpi |
| chr5:66928807-66929306  | chr5  | 66928807 | 66929306 | 500   | 53220            | zbtb20            | -136024             | sidkey-251110.2 | differentially open at 2dpi |
| chr5:71139273-71139772  | chr5  | 71139273 | 71139772 | 500   | 71080            | fam78ab           | -2869087            | ank1a           | differentially open at 2dpi |
| chr5:71403458-71404338  | chr5  | 71403458 | 71404338 | 881   | -6085            | dx5a              | -3133463            | ank1a           | differentially open at 2dpi |
| chr6:327105-327604      | chr6  | 327105   | 327604   | 500   | 5604             | pde6ha            | 92121               | grap2b          | differentially open at 2dpi |
| chr6:526191-526690      | chr6  | 526191   | 526690   | 500   | -34639           | zgc:92360         | -106965             | grap2b          | differentially open at 2dpi |
| chr6:11900072-11900571  | chr6  | 11900072 | 11900571 | 500   | 129106           | wdsu1b            | 129106              | wdsu1b          | differentially open at 2dpi |
| chr6:25271538-25272037  | chr6  | 25271538 | 25272037 | 500   | -1               | kyat3             | 553745              | barh2           | differentially open at 2dpi |
| chr6:58980501-58981000  | chr6  | 58980501 | 58981000 | 500   | 26               | mans              | -210349             | soat2           | differentially open at 2dpi |
| chr6:59759972-59760471  | chr6  | 59759972 | 59760471 | 500   | -2546            | zgc:65895         | 392387              | slc32a1         | differentially open at 2dpi |
| chr6:59865579-59866078  | chr6  | 59865579 | 59866078 | 500   | -34759           | ddx3b             | 286781              | slc32a1         | differentially open at 2dpi |
| chr7:5304709-5305208    | chr7  | 5304709  | 5305208  | 500   | -51551           | wangl2            | -413506             | hb4r            | differentially open at 2dpi |
| chr7:6944553-6945429    | chr7  | 6944553  | 6945429  | 877   | 130125           | actn3b            | 315381              | pfdn2           | differentially open at 2dpi |
| chr7:7351882-7352381    | chr7  | 7351882  | 7352381  | 500   | 90394            | nif1              | -91760              | pfdn2           | differentially open at 2dpi |
| chr7:10318592-10319091  | chr7  | 10318592 | 10319091 | 500   | -1169            | zland6            | 1493865             | mex3b           | differentially open at 2dpi |
| chr7:24647925-24648424  | chr7  | 24647925 | 24648424 | 500   | 37590            | krcp              | 37590               | krcp            | differentially open at 2dpi |
| chr7:40885503-40886002  | chr7  | 40885503 | 40886002 | 500   | 5600             | scrib             | 173085              | nctf2           | differentially open at 2dpi |
| chr7:69217869-69218368  | chr7  | 69217869 | 69218368 | 500   | 6310             | ctdnp1b           | 65170               | slc1a1          | differentially open at 2dpi |
| chr7:73160434-73160933  | chr7  | 73160434 | 73160933 | 500   | -64881           | cbn1b             | -1522829            | cacnb2a         | differentially open at 2dpi |
| chr7:73948002-73948501  | chr7  | 73948002 | 73948501 | 500   | -50472           | clnd1a            | -2310397            | cacnb2a         | differentially open at 2dpi |
| chr7:73951811-73952310  | chr7  | 73951811 | 73952310 | 500   | -54280           | clnd1a            | -2314205            | cacnb2a         | differentially open at 2dpi |
| chr7:74078097-74078596  | chr7  | 74078097 | 74078596 | 500   | 8340             | ppp1cbl           | -2440491            | cacnb2a         | differentially open at 2dpi |
| chr9:5470172-5470671    | chr9  | 5470172  | 5470671  | 500   | 19075            | tmfsf13b          | -1823689            | sidkey-4e7.3    | differentially open at 2dpi |
| chr9:44213691-44214190  | chr9  | 44213691 | 44214190 | 500   | 217825           | ube2e3            | -477399             | znf385b         | differentially open at 2dpi |
| chr10:153604-154103     | chr10 | 153604   | 154103   | 500   | 14006            | erg               | -33955              | ets2            | differentially open at 2dpi |
| chr10:384344-384843     | chr10 | 384344   | 384843   | 500   | 39623            | zgc:171929        | -173891             | psmg1           | differentially open at 2dpi |
| chr10:443696-444195     | chr10 | 443696   | 444195   | 500   | -72955           | npfr1l3           | -332343             | psmg1           | differentially open at 2dpi |
| chr10:1799621-1800120   | chr10 | 1799621  | 1800120  | 500   | 2                | spb4114a          | -1589167            | psmg1           | differentially open at 2dpi |
| chr10:5135268-5135767   | chr10 | 5135268  | 5135767  | 500   | -20              | zgc:113274        | -278421             | nfi3            | differentially open at 2dpi |
| chr10:5211717-5212216   | chr10 | 5211717  | 5212216  | 500   | -22074           | sp1c1             | -201973             | nfi3            | differentially open at 2dpi |
| chr10:6381773-6382272   | chr10 | 6381773  | 6382272  | 500   | -55              | zgc:114200        | -569140             | h6st            | differentially open at 2dpi |
| chr10:13701874-13702373 | chr10 | 13701874 | 13702373 | 500   | 112604           | cnfr              | 659549              | par1            | differentially open at 2dpi |
| chr11:165810-166309     | chr11 | 165810   | 166309   | 500   | -12993           | zgc:172352        | 103162              | slc11a2         | differentially open at 2dpi |
| chr11:12802692-12803447 | chr11 | 12802692 | 12803447 | 756   | 230              | zgapat            | 291573              | elov1b          | differentially open at 2dpi |
| chr11:20623277-20623776 | chr11 | 20623277 | 20623776 | 500   | 230478           | slc6a14           | 353656              | cdh4            | differentially open at 2dpi |
| chr11:45076061-45076560 | chr11 | 45076061 | 45076560 | 500   | 17205            | sos1              | 337578              | tk1             | differentially open at 2dpi |
| chr12:3830775-3831274   | chr12 | 3830775  | 3831274  | 500   | -3675            | nfi3l1            | 19675               | cabp5a          | differentially open at 2dpi |
| chr12:16832439-16832938 | chr12 | 16832439 | 16832938 | 500   | 904              | pank1b            | 246466              | lipf            | differentially open at 2dpi |
| chr12:34189941-34190440 | chr12 | 34189941 | 34190440 | 500   | 17907            | socs3b            | 144084              | birc5a          | differentially open at 2dpi |
| chr12:38575744-38576243 | chr12 | 38575744 | 38576243 | 500   | -57150           | abca5             | 193924              | rip3b           | differentially open at 2dpi |
| chr12:48551037-48551536 | chr12 | 48551037 | 48551536 | 500   | 11658            | tex47             | 244390              | lrcc20          | differentially open at 2dpi |
| chr13:1001301-1001800   | chr13 | 1001301  | 1001800  | 500   | 25               | wdr92             | -1782               | pno1            | differentially open at 2dpi |

|                                |                  |          |          |     |         |                   |           |            |                                |
|--------------------------------|------------------|----------|----------|-----|---------|-------------------|-----------|------------|--------------------------------|
| chr13:1484577-1485076          | chr13            | 1484577  | 1485076  | 500 | -206298 | bag2              | -206298   | bag2       | differentially open at 2dpi    |
| chr13:6989718-6990217          | chr13            | 6989718  | 6990217  | 500 | 30213   | LOC795051         | -933230   | hells      | differentially open at 2dpi    |
| chr13:51544130-51544629        | chr13            | 51544130 | 51544629 | 500 | 25604   | klic1b            | 73078     | lbh        | differentially open at 2dpi    |
| chr13:51623489-51623988        | chr13            | 51623489 | 51623988 | 500 | -6280   | lbh               | -6280     | lbh        | differentially open at 2dpi    |
| chr14:181543-182042            | chr14            | 181543   | 182042   | 500 | 21534   | gpc2              | 31590     | mcm7       | differentially open at 2dpi    |
| chr14:24633380-24633879        | chr14            | 24633380 | 24633879 | 500 | 103294  | cdcf6a            | 646233    | cpib2      | differentially open at 2dpi    |
| chr14:51841744-51842243        | chr14            | 51841744 | 51842243 | 500 | -6172   | pl26              | -13465    | atp6v0e1   | differentially open at 2dpi    |
| chr15:22879-23378              | chr15            | 22879    | 23378    | 500 | -266    | hace1             | 320244    | lmk1a      | differentially open at 2dpi    |
| chr15:116690-117189            | chr15            | 116690   | 117189   | 500 | -12598  | cyp2y3            | 226432    | lmk1a      | differentially open at 2dpi    |
| chr15:201627-202126            | chr15            | 201627   | 202126   | 500 | -14330  | LOC100002960      | 141496    | lmk1a      | differentially open at 2dpi    |
| chr15:156909-1569954           | chr15            | 156909   | 1569954  | 946 | -159    | nr80              | -234      | smc4       | differentially open at 2dpi    |
| chr15:2059310-20593609         | chr15            | 2059310  | 20593609 | 500 | -220    | mfap1             | 387086    | usp2a      | differentially open at 2dpi    |
| chr15:44093163-44093662        | chr15            | 44093163 | 44093662 | 500 | 23567   | zgc:112998        | 63611     | lrcc51     | differentially open at 2dpi    |
| chr15:45801381-45801880        | chr15            | 45801381 | 45801880 | 500 | 22858   | lrn1              | 176107    | sagb       | differentially open at 2dpi    |
| chr15:47041964-47042463        | chr15            | 47041964 | 47042463 | 500 | -16574  | sik3              | 1416691   | sagb       | differentially open at 2dpi    |
| chr15:47515380-47515879        | chr15            | 47515380 | 47515879 | 500 | -118293 | cep57             | 1890107   | sagb       | differentially open at 2dpi    |
| chr16:1384691-1385190          | chr16            | 1384691  | 1385190  | 500 | 94195   | sim1a             | 647278    | lrx1a      | differentially open at 2dpi    |
| chr16:2582464-2582963          | chr16            | 2582464  | 2582963  | 500 | -2223   | acot22            | -261727   | adcy3a     | differentially open at 2dpi    |
| chr16:20249721-20250220        | chr16            | 20249721 | 20250220 | 500 | -17526  | ahr1a             | -165515   | hdac9b     | differentially open at 2dpi    |
| chr16:48595152-48595651        | chr16            | 48595152 | 48595651 | 500 | 76547   | ext1a             | -136770   | eil3ha     | differentially open at 2dpi    |
| chr16:54619065-54619564        | chr16            | 54619065 | 54619564 | 500 | 15369   | pkir              | 1540191   | trip13     | differentially open at 2dpi    |
| chr17:487548-488047            | chr17            | 487548   | 488047   | 500 | -29921  | chrm5a            | -372235   | gchr       | differentially open at 2dpi    |
| chr17:1395288-1395787          | chr17            | 1395288  | 1395787  | 500 | -6587   | dio3a             | 113774    | wars       | differentially open at 2dpi    |
| chr17:8489676-8490175          | chr17            | 8489676  | 8490175  | 500 | 45616   | ctbp2a            | 45616     | ctbp2a     | differentially open at 2dpi    |
| chr17:28689744-28690243        | chr17            | 28689744 | 28690243 | 500 | -211    | stm3              | 104643    | g2e3       | differentially open at 2dpi    |
| chr17:43711273-43711772        | chr17            | 43711273 | 43711772 | 500 | 38413   | ahsa1b            | -670253   | npc2       | differentially open at 2dpi    |
| chr17:51613348-51613847        | chr17            | 51613348 | 51613847 | 500 | 20204   | ncil10            | 478212    | adi1       | differentially open at 2dpi    |
| chr18:272145-272644            | chr18            | 272145   | 272644   | 500 | -12073  | larp6a            | -746281   | pkma       | differentially open at 2dpi    |
| chr18:5548260-5548759          | chr18            | 5548260  | 5548759  | 500 | 16453   | sic24a5           | -89086    | mibp2      | differentially open at 2dpi    |
| chr18:6627792-6628291          | chr18            | 6627792  | 6628291  | 500 | 76073   | fam168a           | 469717    | utp15      | differentially open at 2dpi    |
| chr18:7072291-7072790          | chr18            | 7072291  | 7072790  | 500 | -110    | calub             | 25219     | utp15      | differentially open at 2dpi    |
| chr18:8700770-8701269          | chr18            | 8700770  | 8701269  | 500 | -79132  | si:ch211-220f12.1 | -712952   | sema3ab    | differentially open at 2dpi    |
| chr18:41520738-41521237        | chr18            | 41520738 | 41521237 | 500 | -964    | ccn1a             | -964      | ccn1a      | differentially open at 2dpi    |
| chr18:50489493-50489992        | chr18            | 50489493 | 50489992 | 500 | 37722   | cd276             | 37722     | cd276      | differentially open at 2dpi    |
| chr19:19931582-19932081        | chr19            | 19931582 | 19932081 | 500 | -7732   | jazf1a            | 590331    | mpp6b      | differentially open at 2dpi    |
| chr19:20512302-20512801        | chr19            | 20512302 | 20512801 | 500 | 9611    | mpp6b             | 9611      | mpp6b      | differentially open at 2dpi    |
| chr19:25880479-25880978        | chr19            | 25880479 | 25880978 | 500 | -112    | rap3              | -193838   | nims3      | differentially open at 2dpi    |
| chr20:6486555-6487054          | chr20            | 6486555  | 6487054  | 500 | -16897  | mep1b             | -1202574  | ism2b      | differentially open at 2dpi    |
| chr20:15652847-15653346        | chr20            | 15652847 | 15653346 | 500 | -148    | jun               | -148      | jun        | differentially open at 2dpi    |
| chr20:15656516-15657393        | chr20            | 15656516 | 15657393 | 878 | -3684   | si:dkey-86e18.2   | 3710      | jun        | differentially open at 2dpi    |
| chr20:15687329-15687828        | chr20            | 15687329 | 15687828 | 500 | -13254  | faslg             | 34334     | jun        | differentially open at 2dpi    |
| chr20:17982452-17982951        | chr20            | 17982452 | 17982951 | 500 | 142181  | cdh2              | -281083   | aqp4       | differentially open at 2dpi    |
| chr20:20868444-20868943        | chr20            | 20868444 | 20868943 | 500 | 37340   | ppp1r13bb         | 53391     | ckbb       | differentially open at 2dpi    |
| chr20:38079431-38079930        | chr20            | 38079431 | 38079930 | 500 | -49304  | angel2            | -50019    | gain114    | differentially open at 2dpi    |
| chr20:39316562-39317061        | chr20            | 39316562 | 39317061 | 500 | -149    | cyp39a1           | -31215    | rcan2      | differentially open at 2dpi    |
| chr20:54830661-54831160        | chr20            | 54830661 | 54831160 | 500 | -18186  | ppp1r35           | 540969    | ps29       | differentially open at 2dpi    |
| chr21:697792-698291            | chr21            | 697792   | 698291   | 500 | -838    | caz1b             | 395532    | hfp12a     | differentially open at 2dpi    |
| chr21:4375223-4375722          | chr21            | 4375223  | 4375722  | 500 | -183    | dolk              | 283687    | lrcc8a     | differentially open at 2dpi    |
| chr21:11235062-11235561        | chr21            | 11235062 | 11235561 | 500 | -110    | rkn2b             | -128574   | dnajc21    | differentially open at 2dpi    |
| chr21:39416988-39417487        | chr21            | 39416988 | 39417487 | 500 | -224    | mntb              | 104537    | dynl2b     | differentially open at 2dpi    |
| chr22:20971838-20972337        | chr22            | 20971838 | 20972337 | 500 | -46616  | rkbp8             | 49628     | ssbp4      | differentially open at 2dpi    |
| chr22:37094885-37095384        | chr22            | 37094885 | 37095384 | 500 | -109487 | si:dkey-37m8.11   | -601092   | psmd1      | differentially open at 2dpi    |
| chr23:1280885-1281384          | chr23            | 1280885  | 1281384  | 500 | -146829 | psmb11b           | 715726    | ogfr       | differentially open at 2dpi    |
| chr23:2174238-2174737          | chr23            | 2174238  | 2174737  | 500 | -147271 | prdm5             | -307710   | tcp1       | differentially open at 2dpi    |
| chr23:14677630-14678129        | chr23            | 14677630 | 14678129 | 500 | -30018  | nkain4            | 216449    | birc7      | differentially open at 2dpi    |
| chr23:16765279-16766037        | chr23            | 16765279 | 16766037 | 759 | 296     | rkbp1ab           | -9815     | sdcbbp2    | differentially open at 2dpi    |
| chr23:39321018-39321517        | chr23            | 39321018 | 39321517 | 500 | 26749   | bmf1              | -132751   | src        | differentially open at 2dpi    |
| chr23:45941247-45941746        | chr23            | 45941247 | 45941746 | 500 | 28838   | ednrab            | 920679    | atp1b2a    | differentially open at 2dpi    |
| chr25:136191-136690            | chr25            | 136191   | 136690   | 500 | -45643  | zgc:114188        | 2772371   | scamp2     | differentially open at 2dpi    |
| chr25:222688-223187            | chr25            | 222688   | 223187   | 500 | 626     | zgc:92481         | 2685873   | scamp2     | differentially open at 2dpi    |
| chr25:10696492-10696991        | chr25            | 10696492 | 10696991 | 500 | 37      | ap3s2             | 246291    | zgc:110339 | differentially open at 2dpi    |
| chrUn_KN149790v1:100748-101247 | chrUn_KN149790v1 | 100748   | 101247   | 500 | -6772   | zgc:171422        | NA        | NA         | differentially open at 2dpi    |
| chrUn_KN150361v1:39209-39708   | chrUn_KN150361v1 | 39209    | 39708    | 500 | NA      | NA                | NA        | NA         | differentially open at 2dpi    |
| chrUn_KN150600v1:341-840       | chrUn_KN150600v1 | 341      | 840      | 500 | NA      | NA                | NA        | NA         | differentially open at 2dpi    |
| chr2:15088215-15088714         | chr2             | 15088215 | 15088714 | 500 | -100384 | leprot            | 1076793   | abna1bp2   | differentially closed at 2dpi  |
| chr5:61868726-61869225         | chr5             | 61868726 | 61869225 | 500 | -57698  | abr               | -1.11E+06 | ncf1       | differentially closed at 2dpi  |
| chr7:5468715-5469214           | chr7             | 5468715  | 5469214  | 500 | -103604 | arhgef11          | -577512   | hb4r       | differentially closed at 2dpi  |
| chr20:15442099-15442598        | chr20            | 15442099 | 15442598 | 500 | 177367  | prdx6             | -210896   | jun        | differentially closed at 2dpi  |
| chr20:18383573-18384072        | chr20            | 18383573 | 18384072 | 500 | 30430   | psma8             | 120037    | aqp4       | differentially closed at 2dpi  |
| chr21:24198964-24199463        | chr21            | 24198964 | 24199463 | 500 | 282640  | cadm1a            | 282640    | cadm1a     | differentially closed at 2dpi  |
| chr22:17120757-17121529        | chr22            | 17120757 | 17121529 | 773 | 26763   | fram1b            | -480764   | poir2eb    | differentially closed at 2dpi  |
| chr22:30060403-30060902        | chr22            | 30060403 | 30060902 | 500 | -79     | si:dkey-286 15.1  | -86975    | dup5       | differentially closed at 2dpi  |
| chr24:16096606-16097105        | chr24            | 16096606 | 16097105 | 500 | -305731 | sema5a            | -593269   | cbn2b      | differentially closed at 2dpi  |
| chr6:59759972-59760471         | chr6             | 59759972 | 59760471 | 500 | -2546   | zgc:65895         | 392387    | sic32a1    | differentially open at 12dpi   |
| chr6:59899089-59900027         | chr6             | 59899089 | 59900027 | 939 | -1029   | ddx3b             | 253051    | sic32a1    | differentially open at 12dpi   |
| chr7:6944553-6945429           | chr7             | 6944553  | 6945429  | 877 | 130125  | actn3b            | 315381    | prdn2      | differentially open at 12dpi   |
| chr9:17415700-17416199         | chr9             | 17415700 | 17416199 | 500 | -5623   | zgc:101559        | -15126    | rgcc       | differentially open at 12dpi   |
| chr15:253918-254417            | chr15            | 253918   | 254417   | 500 | 115     | sept4b            | 89204     | lmk1a      | differentially open at 12dpi   |
| chr17:43296504-43297003        | chr17            | 43296504 | 43297003 | 500 | 141105  | pk4               | -255485   | npc2       | differentially open at 12dpi   |
| chr2:81394-81893               | chr2             | 81394    | 81893    | 500 | 31014   | zgc:153913        | -1514947  | exosc4     | differentially closed at 12dpi |

|                              |                  |          |          |      |         |            |          |            |                                |
|------------------------------|------------------|----------|----------|------|---------|------------|----------|------------|--------------------------------|
| chr2:19780119-19781338       | chr2             | 19780119 | 19781338 | 1220 | -66386  | pimr141    | 265831   | elov11a    | differentially closed at 12dpi |
| chr2:19781474-19781973       | chr2             | 19781474 | 19781973 | 500  | -65590  | pimr141    | 266827   | elov11a    | differentially closed at 12dpi |
| chr2:19787237-19788192       | chr2             | 19787237 | 19788192 | 956  | -59400  | pimr141    | 272817   | elov11a    | differentially closed at 12dpi |
| chr2:19813598-19814097       | chr2             | 19813598 | 19814097 | 500  | -33266  | pimr141    | 298951   | elov11a    | differentially closed at 12dpi |
| chr2:19817067-19817998       | chr2             | 19817067 | 19817998 | 932  | -29582  | pimr141    | 302635   | elov11a    | differentially closed at 12dpi |
| chr2:19818257-19818756       | chr2             | 19818257 | 19818756 | 500  | -28608  | pimr141    | 303609   | elov11a    | differentially closed at 12dpi |
| chr2:19822778-19823647       | chr2             | 19822778 | 19823647 | 870  | -23902  | pimr141    | 308315   | elov11a    | differentially closed at 12dpi |
| chr2:19826215-19827613       | chr2             | 19826215 | 19827613 | 1399 | -20200  | pimr141    | 312017   | elov11a    | differentially closed at 12dpi |
| chr3:55093026-55093806       | chr3             | 55093026 | 55093806 | 781  | 52958   | mafqa      | -355101  | mbdf1a     | differentially closed at 12dpi |
| chr3:55095105-55095604       | chr3             | 55095105 | 55095604 | 500  | 51020   | mafqa      | -357039  | mbdf1a     | differentially closed at 12dpi |
| chr3:55100242-55101294       | chr3             | 55100242 | 55101294 | 1053 | 45606   | mafqa      | -362453  | mbdf1a     | differentially closed at 12dpi |
| chr3:55105417-55106689       | chr3             | 55105417 | 55106689 | 1273 | 40321   | mafqa      | -367738  | mbdf1a     | differentially closed at 12dpi |
| chr4:28604846-28605345       | chr4             | 28604846 | 28605345 | 500  | -126528 | mi430a-18  | -1293028 | fam19a5a   | differentially closed at 12dpi |
| chr5:47142933-47143815       | chr5             | 47142933 | 47143815 | 883  | -36609  | cox7c      | -1237825 | hapln1a    | differentially closed at 12dpi |
| chr7:52730398-52730897       | chr7             | 52730398 | 52730897 | 500  | -38212  | LOC557301  | -447240  | tcf12      | differentially closed at 12dpi |
| chr7:52740095-52740594       | chr7             | 52740095 | 52740594 | 500  | -47908  | LOC557301  | -456936  | tcf12      | differentially closed at 12dpi |
| chr7:52742377-52743183       | chr7             | 52742377 | 52743183 | 807  | -50344  | LOC557301  | -459372  | tcf12      | differentially closed at 12dpi |
| chr7:52748837-52749336       | chr7             | 52748837 | 52749336 | 500  | -56650  | LOC557301  | -465678  | tcf12      | differentially closed at 12dpi |
| chr7:54788736-54789235       | chr7             | 54788736 | 54789235 | 500  | -22586  | snai3      | 543078   | gains      | differentially closed at 12dpi |
| chr7:54790698-54791197       | chr7             | 54790698 | 54791197 | 500  | -20624  | snai3      | 541116   | gains      | differentially closed at 12dpi |
| chr8:34228765-34229586       | chr8             | 34228765 | 34229586 | 822  | -152153 | pbx3b      | -152153  | pbx3b      | differentially closed at 12dpi |
| chr8:34229943-34230784       | chr8             | 34229943 | 34230784 | 842  | -153341 | pbx3b      | -153341  | pbx3b      | differentially closed at 12dpi |
| chr8:34235505-34236004       | chr8             | 34235505 | 34236004 | 500  | -158731 | pbx3b      | -158731  | pbx3b      | differentially closed at 12dpi |
| chr8:34239947-34240446       | chr8             | 34239947 | 34240446 | 500  | -163173 | pbx3b      | -163173  | pbx3b      | differentially closed at 12dpi |
| chr8:34243228-34243727       | chr8             | 34243228 | 34243727 | 500  | -166455 | pbx3b      | -166455  | pbx3b      | differentially closed at 12dpi |
| chr8:34244143-34244642       | chr8             | 34244143 | 34244642 | 500  | -167369 | pbx3b      | -167369  | pbx3b      | differentially closed at 12dpi |
| chr8:34846434-34847288       | chr8             | 34846434 | 34847288 | 855  | 49679   | hpdB       | -769838  | pbx3b      | differentially closed at 12dpi |
| chr8:34851982-34852936       | chr8             | 34851982 | 34852936 | 955  | 55277   | hpdB       | -775436  | pbx3b      | differentially closed at 12dpi |
| chr8:34857277-34857776       | chr8             | 34857277 | 34857776 | 500  | 60344   | hpdB       | -780503  | pbx3b      | differentially closed at 12dpi |
| chr8:34874225-34874724       | chr8             | 34874225 | 34874724 | 500  | 77292   | hpdB       | -797451  | pbx3b      | differentially closed at 12dpi |
| chr10:16847552-16848051      | chr10            | 16847552 | 16848051 | 500  | 62555   | stoml2     | 304222   | sic27a6    | differentially closed at 12dpi |
| chr10:16848134-16848633      | chr10            | 16848134 | 16848633 | 500  | 61973   | stoml2     | 304804   | sic27a6    | differentially closed at 12dpi |
| chr10:16848644-16849143      | chr10            | 16848644 | 16849143 | 500  | 61463   | stoml2     | 305314   | sic27a6    | differentially closed at 12dpi |
| chr10:16851015-16852861      | chr10            | 16851015 | 16852861 | 1847 | 58419   | stoml2     | 308358   | sic27a6    | differentially closed at 12dpi |
| chr10:16858621-16859391      | chr10            | 16858621 | 16859391 | 771  | 51351   | stoml2     | 315426   | sic27a6    | differentially closed at 12dpi |
| chr10:16880577-16881974      | chr10            | 16880577 | 16881974 | 1398 | 29081   | stoml2     | 337696   | sic27a6    | differentially closed at 12dpi |
| chr11:17430700-17431898      | chr11            | 17430700 | 17431898 | 1199 | 148053  | fam19a4b   | -1279472 | magi1b     | differentially closed at 12dpi |
| chr11:17432488-17432987      | chr11            | 17432488 | 17432987 | 500  | 146614  | fam19a4b   | -1278033 | magi1b     | differentially closed at 12dpi |
| chr11:17432997-17433496      | chr11            | 17432997 | 17433496 | 500  | 146106  | fam19a4b   | -1277525 | magi1b     | differentially closed at 12dpi |
| chr11:17433633-17434603      | chr11            | 17433633 | 17434603 | 971  | 145234  | fam19a4b   | -1276653 | magi1b     | differentially closed at 12dpi |
| chr13:18988177-18988676      | chr13            | 18988177 | 18988676 | 500  | -164595 | elf3s10    | 807947   | elf4e1c    | differentially closed at 12dpi |
| chr14:19788805-19789543      | chr14            | 19788805 | 19789543 | 739  | -70165  | fmr1       | 1928907  | ssrp1a     | differentially closed at 12dpi |
| chr14:19792068-19792567      | chr14            | 19792068 | 19792567 | 500  | -67021  | fmr1       | 1925763  | ssrp1a     | differentially closed at 12dpi |
| chr14:19792901-19794038      | chr14            | 19792901 | 19794038 | 1138 | -65869  | fmr1       | 1924611  | ssrp1a     | differentially closed at 12dpi |
| chr14:19796029-19797437      | chr14            | 19796029 | 19797437 | 1409 | -62606  | fmr1       | 1921348  | ssrp1a     | differentially closed at 12dpi |
| chr14:19810584-19811525      | chr14            | 19810584 | 19811525 | 942  | -48285  | fmr1       | 1907027  | ssrp1a     | differentially closed at 12dpi |
| chr15:14830321-14830820      | chr15            | 14830321 | 14830820 | 500  | 13985   | arl29-1    | -556208  | zgc:162193 | differentially closed at 12dpi |
| chr16:26006060-26007021      | chr16            | 26006060 | 26007021 | 962  | -91798  | lge4       | 352429   | arhgef1b   | differentially closed at 12dpi |
| chr16:26013553-26014547      | chr16            | 26013553 | 26014547 | 995  | -99308  | lge4       | 344919   | arhgef1b   | differentially closed at 12dpi |
| chr16:26053213-26053712      | chr16            | 26053213 | 26053712 | 500  | -85665  | prss59.1   | 305507   | arhgef1b   | differentially closed at 12dpi |
| chr16:26056249-26056748      | chr16            | 26056249 | 26056748 | 500  | -82629  | prss59.1   | 302471   | arhgef1b   | differentially closed at 12dpi |
| chr16:26058671-26059170      | chr16            | 26058671 | 26059170 | 500  | -80207  | prss59.1   | 300049   | arhgef1b   | differentially closed at 12dpi |
| chr16:26065441-26065940      | chr16            | 26065441 | 26065940 | 500  | -73437  | prss59.1   | 293279   | arhgef1b   | differentially closed at 12dpi |
| chr16:26067798-26068703      | chr16            | 26067798 | 26068703 | 906  | -70877  | prss59.1   | 290719   | arhgef1b   | differentially closed at 12dpi |
| chr17:45219176-45219675      | chr17            | 45219176 | 45219675 | 500  | 27546   | capn3a     | 184145   | tmem206    | differentially closed at 12dpi |
| chr17:45222066-45222565      | chr17            | 45222066 | 45222565 | 500  | 30436   | capn3a     | 181255   | tmem206    | differentially closed at 12dpi |
| chr17:46968319-46968818      | chr17            | 46968319 | 46968818 | 500  | -38468  | zgc:103755 | 1242885  | smoc1      | differentially closed at 12dpi |
| chr17:46977515-46978014      | chr17            | 46977515 | 46978014 | 500  | -29272  | zgc:103755 | 1233689  | smoc1      | differentially closed at 12dpi |
| chr17:46978496-46978995      | chr17            | 46978496 | 46978995 | 500  | -28290  | zgc:103755 | 1232707  | smoc1      | differentially closed at 12dpi |
| chr17:46981453-46982699      | chr17            | 46981453 | 46982699 | 1247 | -24960  | zgc:103755 | 1229377  | smoc1      | differentially closed at 12dpi |
| chr20:4437575-4438074        | chr20            | 4437575  | 4438074  | 500  | -68077  | pcef1      | 846406   | ism2b      | differentially closed at 12dpi |
| chr21:25809834-25810333      | chr21            | 25809834 | 25810333 | 500  | -44733  | mett21     | -225121  | mpl23a     | differentially closed at 12dpi |
| chr21:25823531-25824030      | chr21            | 25823531 | 25824030 | 500  | -58429  | mett21     | -211425  | mpl23a     | differentially closed at 12dpi |
| chr21:44162938-44163437      | chr21            | 44162938 | 44163437 | 500  | 45439   | lgr1b      | -205396  | camk2a     | differentially closed at 12dpi |
| chr22:24497163-24497662      | chr22            | 24497163 | 24497662 | 500  | -35194  | wdr47b     | -275554  | rgs2       | differentially closed at 12dpi |
| chr22:24500122-24501449      | chr22            | 24500122 | 24501449 | 1328 | -31820  | wdr47b     | -278928  | rgs2       | differentially closed at 12dpi |
| chr22:24503566-24505214      | chr22            | 24503566 | 24505214 | 1649 | -28216  | wdr47b     | -282532  | rgs2       | differentially closed at 12dpi |
| chr23:12684435-12685935      | chr23            | 12684435 | 12685935 | 1501 | -166455 | snx21      | -274391  | phactr3a   | differentially closed at 12dpi |
| chr23:16244775-16246161      | chr23            | 16244775 | 16246161 | 1387 | -85259  | mrgbp      | -122666  | eeef1a2    | differentially closed at 12dpi |
| chr24:16118773-16120428      | chr24            | 16118773 | 16120428 | 1656 | -282987 | sema5a     | -616013  | cbn2b      | differentially closed at 12dpi |
| chr24:16126674-16127173      | chr24            | 16126674 | 16127173 | 500  | -275663 | sema5a     | -623337  | cbn2b      | differentially closed at 12dpi |
| chrUn_KN149692v1:4089-5235   | chrUn_KN149692v1 | 4089     | 5235     | 1147 | NA      | NA         | NA       | NA         | differentially closed at 12dpi |
| chrUn_KN149692v1:5249-6134   | chrUn_KN149692v1 | 5249     | 6134     | 886  | NA      | NA         | NA       | NA         | differentially closed at 12dpi |
| chrUn_KN149692v1:10411-11564 | chrUn_KN149692v1 | 10411    | 11564    | 1154 | NA      | NA         | NA       | NA         | differentially closed at 12dpi |
| chrUn_KN149692v1:13822-14321 | chrUn_KN149692v1 | 13822    | 14321    | 500  | NA      | NA         | NA       | NA         | differentially closed at 12dpi |
| chrUn_KN149692v1:16713-17212 | chrUn_KN149692v1 | 16713    | 17212    | 500  | NA      | NA         | NA       | NA         | differentially closed at 12dpi |
| chrUn_KN149692v1:20397-21478 | chrUn_KN149692v1 | 20397    | 21478    | 1082 | NA      | NA         | NA       | NA         | differentially closed at 12dpi |

Table S5. Differentially expressed transcripts that encode transcription factors with and without known motifs.

| Ensembl ID         | zebrafish gene symbol | padj        | LFC: 2dpi-0dpi | LFC: 4dpi-0dpi | LFC: 7dpi-0dpi | LFC: 12dpi-0dpi | cluster name              |
|--------------------|-----------------------|-------------|----------------|----------------|----------------|-----------------|---------------------------|
| ENSART00000140760  | e2f7                  | 0.044060134 | 0.798632306    | 0.496792942    | -0.026056819   | -0.454809271    | growth toward the midline |
| ENSART00000056005  | ascl1a                | 0.032093457 | 1.787445127    | 1.283325532    | 0.749862779    | 0.792492648     | growth toward the midline |
| ENSART00000128488  | e2f8                  | 0.003382652 | 3.852661131    | -0.929008264   | 3.252279997    | 2.01178299      | growth toward the midline |
| ENSART00000160644  | mitfb                 | 0.042577687 | 0.302243319    | 0.237275907    | 0.106756262    | -0.337810921    | growth toward the midline |
| ENSART00000157487  | tfec                  | 0.001790465 | 0.534318298    | 0.423012313    | 0.205933849    | -0.313187686    | growth toward the midline |
| ENSART00000114288  | foxp4                 | 0.028339664 | 0.17723361     | 0.325948274    | 0.017102596    | -0.613519733    | growth toward the midline |
| ENSART00000158466  | creb3l2               | 0.011352496 | 0.073267533    | 0.091531466    | -0.07087733    | -0.32121815     | growth toward the midline |
| ENSART00000164766  | tfec                  | 0.012357429 | 0.976052476    | 1.18639141     | 0.809154671    | -1.643283392    | growth toward the midline |
| ENSART00000142584  | alx1                  | 0.047364517 | 1.361674144    | 1.279023188    | 1.723053191    | -0.115335088    | growth toward the midline |
| ENSART00000081468  | ccdc79                | 0.001875423 | 0.331555315    | 0.505423262    | 0.318137438    | -0.103372006    | growth toward the midline |
| ENSART00000155066  | atf5b                 | 0.027985198 | 0.303227837    | 0.449779577    | 0.245269838    | -0.118029433    | growth toward the midline |
| ENSART00000160644  | rela                  | 0.030637152 | 0.027046368    | 0.22531925     | 0.299056597    | -0.13648552     | growth toward the midline |
| ENSART00000146767  | fosl1a                | 0.046117855 | 0.841007094    | 1.285901651    | 0.733422298    | 0.173089455     | growth toward the midline |
| ENSART00000152378  | tgif1                 | 0.003122803 | 0.194631245    | 0.419803811    | 0.14379228     | -0.205607529    | growth toward the midline |
| ENSART00000051549  | tp53                  | 0.029170799 | 0.110640197    | 0.281712522    | 0.180041895    | -0.162598759    | growth toward the midline |
| ENSART00000013409  | prmt3                 | 0.000336326 | 0.583250552    | 0.486757337    | 0.420985526    | -0.028812313    | growth toward the midline |
| ENSART00000104519  | stat3                 | 0.004480141 | 0.6458865      | 0.459098575    | 0.438501049    | 0.201812376     | growth toward the midline |
| ENSART00000058277  | znf800b               | 0.018079865 | 0.363600272    | 0.378301813    | 0.156623376    | -0.047842936    | growth toward the midline |
| ENSART00000103982  | nfe2l1a               | 0.007828891 | 0.652859432    | 0.675562602    | 0.38648833     | -0.18398816     | growth toward the midline |
| ENSART00000093279  | spi1b                 | 0.002640644 | 0.891535687    | 0.563855895    | 0.100587929    | -0.531177734    | growth toward the midline |
| ENSART00000036729  | spi1b                 | 0.004358158 | 0.910663058    | 0.717004711    | 0.095052493    | -0.117318513    | growth toward the midline |
| ENSART00000008373  | fosl1a                | 0.001576361 | 0.78271954     | 0.570182098    | 0.226810387    | -0.332448721    | growth toward the midline |
| ENSART00000093199  | tead3b                | 0.016523707 | 1.081516431    | 0.86043279     | 0.478204597    | -0.215799128    | growth toward the midline |
| ENSART00000062702  | cebpb                 | 0.018433591 | 0.973724375    | 0.549827472    | 0.384246832    | -0.627629236    | growth toward the midline |
| ENSART00000056457  | mitfa                 | 0.005353377 | 0.929754118    | 0.38849893     | 0.30836176     | -0.311729197    | growth toward the midline |
| ENSART00000080854  | stat3                 | 0.03033326  | 0.856010749    | 0.444560766    | 0.379796349    | -0.326021696    | growth toward the midline |
| ENSART00000017185  | tbx20                 | 0.035967167 | 0.559146809    | 0.370265655    | -0.151461394   | -0.656442573    | growth toward the midline |
| ENSART00000086053  | PRDM16                | 0.037061149 | 0.751033854    | 0.474975066    | 0.399761078    | -0.264438466    | growth toward the midline |
| ENSART00000052366  | cebpa                 | 0.035286858 | 0.847474055    | 0.814939712    | 0.318232429    | -0.173654256    | growth toward the midline |
| ENSART00000062854  | nfe2l2a               | 0.008134819 | 0.155734951    | 0.146836561    | -0.112595282   | -0.207726174    | growth toward the midline |
| ENSART00000016135  | nfe2l3                | 0.02142158  | 0.030439041    | 0.342226134    | 0.430712572    | 0.086440986     | midline crossing          |
| ENSART00000141068  | sox11b                | 8.49E-05    | 1.611838536    | 2.177304965    | 2.010624009    | 1.194765222     | midline crossing          |
| ENSART00000149074  | sall1b                | 2.18E-05    | 1.974229239    | 2.883794957    | 2.506155499    | 1.735121972     | midline crossing          |
| ENSART00000138821  | nfil3                 | 0.000101984 | 1.376309909    | 2.121391468    | 1.99718084     | 1.39511595      | midline crossing          |
| ENSART00000153227  | nfe2l1b               | 0.013323448 | 0.688085235    | 1.301360444    | 1.138008541    | 0.729999096     | midline crossing          |
| ENSART00000082434  | tgif1                 | 1.75E-05    | 0.822910382    | 1.229522702    | 1.441745222    | 0.912580325     | midline crossing          |
| ENSART00000104317  | klf7b                 | 0.000976528 | 0.389436838    | 1.156291561    | 1.140404424    | 0.652703479     | midline crossing          |
| ENSART00000099849  | arntl2                | 9.24E-05    | 0.982355145    | 1.78511579     | 1.609893892    | 1.255639962     | midline crossing          |
| ENSART00000123263  | phf20a                | 0.000701449 | 3.204242437    | 4.684552705    | 5.028378766    | 3.758919167     | midline crossing          |
| ENSART00000124040  | insm1a                | 1.46E-05    | 0.50962443     | 1.551047216    | 1.738068624    | 1.104992333     | midline crossing          |
| ENSART00000159652  | sox4b                 | 0.008897727 | 0.767109202    | 1.080655119    | 1.389017231    | 0.976257694     | midline crossing          |
| ENSART00000062576  | thyn1                 | 0.006623227 | 0.902996379    | 0.741810201    | 0.792519989    | 0.219218083     | midline crossing          |
| ENSART00000098285  | atf5a                 | 0.018496153 | 0.558593719    | 0.754458044    | 0.445954377    | 0.160619888     | midline crossing          |
| ENSART00000063912  | jun                   | 0.002341904 | 1.166146477    | 1.429328618    | 1.29995447     | 0.480560375     | midline crossing          |
| ENSART00000022060  | atf3                  | 2.20E-05    | 2.958540036    | 3.348918067    | 2.852908333    | 1.811501419     | midline crossing          |
| ENSART00000110040  | sox11a                | 8.49E-05    | 1.573346229    | 1.723237215    | 1.23195588     | 0.781584101     | midline crossing          |
| ENSART00000141941  | zfpn2a                | 0.046610115 | 3.791965294    | 3.402723828    | 3.788725401    | 3.249505128     | midline crossing          |
| ENSART00000161610  | tf3b                  | 0.04032679  | 0.066966853    | 0.197082202    | 0.107652202    | -0.03222147     | midline crossing          |
| ENSART00000012791  | sp8a                  | 0.049626195 | 1.57251014     | 2.331511764    | 2.00847442     | 1.039704847     | midline crossing          |
| ENSART00000122628  | junba                 | 0.016136147 | 0.280813702    | 0.583374691    | 0.41181471     | 0.073998168     | midline crossing          |
| ENSART00000024872  | creb3l3               | 0.003959852 | 0.316205692    | 0.628018553    | 0.525420097    | 0.254183225     | midline crossing          |
| ENSART00000123559  | znf521                | 0.000648976 | 1.710422257    | 2.255410725    | 1.850379402    | 0.814044199     | midline crossing          |
| ENSART00000147849  | klf6a                 | 0.000870446 | 1.130982604    | 1.870693821    | 1.403514717    | 0.445060502     | midline crossing          |
| ENSART00000076161  | hoxb5b                | 0.013675681 | 2.652791903    | 3.351280664    | 2.618897772    | 0.864721852     | midline crossing          |
| ENSART00000033494  | klf6a                 | 0.000170861 | 1.084550888    | 1.797692613    | 1.625562666    | 0.460444617     | midline crossing          |
| ENSART00000077484  | zfx2a                 | 0.005803283 | 0.117201305    | 0.356185793    | 0.299966576    | 0.024327323     | midline crossing          |
| ENSART00000005609  | atf4b                 | 0.027440234 | 0.138344185    | 0.51758353     | 0.353617358    | 0.087935611     | midline crossing          |
| ENSART00000138081  | bcl6ab                | 0.000589104 | 0.948060654    | 0.690527167    | 0.988530239    | 1.012261919     | midline crossing          |
| ENSART00000140284  | zbtb16a               | 0.028958693 | 2.407975491    | 2.022869932    | 2.341949009    | 2.679474288     | midline crossing          |
| ENSART00000132119  | max                   | 0.028918785 | 0.339991432    | 0.197083488    | 0.14057043     | 0.318686745     | midline crossing          |
| ENSART000000139763 | stat5a                | 0.018355029 | 3.442434617    | 3.964844196    | 3.417693165    | 3.322184683     | midline crossing          |
| ENSART00000109552  | baz2ba                | 0.004360669 | 0.627489244    | 0.525669422    | 0.712410774    | 0.393101067     | midline crossing          |
| ENSART00000029843  | vezf1a                | 0.001561003 | 0.660507751    | 0.776194217    | 0.884683465    | 0.428803142     | midline crossing          |
| ENSART00000041877  | csnrp1a               | 0.000166716 | 1.299872398    | 1.369159722    | 1.350463811    | 0.717287101     | midline crossing          |
| ENSART000000170865 | nme2b.1               | 0.007383951 | 0.635993303    | 0.679448572    | 0.689008761    | 0.355584206     | midline crossing          |
| ENSART00000135381  | six4a                 | 0.04980099  | 2.521510715    | 2.3671408      | 2.587075649    | 1.691172374     | midline crossing          |
| ENSART00000018743  | phf20a                | 0.027269932 | 0.312029532    | 0.419745206    | 0.325238046    | 0.318832686     | midline crossing          |
| ENSART00000163794  | wt1b                  | 0.02934736  | 0.454982734    | 0.330694147    | 0.317167947    | 0.300420298     | midline crossing          |
| ENSART00000066317  | foxn2b                | 0.033486585 | -0.194754205   | -0.013664444   | 0.221561118    | -0.080707177    | target selection          |
| ENSART00000158598  | si:ch211-232b12.5     | 0.004900248 | -0.304573383   | 0.212713124    | 0.452361247    | 0.038090441     | target selection          |

|                     |                   |             |              |              |              |              |                   |
|---------------------|-------------------|-------------|--------------|--------------|--------------|--------------|-------------------|
| ENDSART00000154418  | relb              | 0.010687727 | -0.043359819 | 0.083083005  | 0.26390054   | -0.071618881 | target selection  |
| ENDSART00000114473  | trafd1            | 0.018765627 | -0.080068432 | 0.005557339  | 0.252422771  | -0.057760312 | target selection  |
| ENDSART00000123197  | relb              | 0.019118248 | -0.261655378 | -0.003226565 | 0.486237661  | -0.265984214 | target selection  |
| ENDSART00000152489  | irf3              | 0.006723268 | -0.152502705 | 0.050924712  | 1.421424509  | -0.375867622 | target selection  |
| ENDSART00000141792  | stat1b            | 0.033143681 | -1.394223287 | -0.705218411 | 2.324563925  | -0.328164239 | target selection  |
| ENDSART00000103622  | irf7              | 0.002828188 | -0.049332142 | -0.2878598   | 1.533925917  | -0.275107455 | target selection  |
| ENDSART00000148661  | stat2             | 0.006978095 | 0.11967996   | -0.016653911 | 1.354000143  | 0.023510931  | target selection  |
| ENDSART0000005720   | stat1a            | 0.010250585 | 0.035880276  | 0.045195542  | 0.615137639  | 0.020671748  | target selection  |
| ENDSART00000156935  | pbx4              | 0.039411387 | 0.960146191  | 0.964981474  | 3.716226941  | 3.606625876  | target selection  |
| ENDSART00000151044  | baz2ba            | 0.006344596 | 2.371956879  | 3.808025242  | 3.802702579  | 3.968575995  | target selection  |
| ENDSART00000023959  | arntl1a           | 7.44E-05    | 0.340904931  | 1.030627189  | 1.45255612   | 0.975945139  | target selection  |
| ENDSART00000104523  | arntl1b           | 0.000255127 | -0.158144123 | 0.59291526   | 1.113237486  | 0.52944604   | target selection  |
| ENDSART00000083628  | ddit3             | 0.002192622 | -0.053032847 | 0.505000026  | 0.598711637  | 0.25299651   | target selection  |
| ENDSART00000110512  | ybx1              | 0.014352201 | 0.187678935  | 0.306636132  | 0.543417204  | 0.157462635  | target selection  |
| ENDSART000000087450 | si:ch211-113e8.10 | 0.041164305 | -0.117833263 | -0.003423122 | 0.202369294  | 0.16110756   | target selection  |
| ENDSART00000025575  | clocka            | 0.041666185 | -0.204691736 | 0.089686311  | 0.498135587  | 0.316118853  | target selection  |
| ENDSART00000152636  | clocka            | 0.010610046 | 0.008631834  | 0.196030905  | 0.593132542  | 0.426491394  | target selection  |
| ENDSART00000089076  | dot1l             | 0.009173096 | 0.094529933  | 0.165735937  | 0.448240264  | 0.463978672  | target selection  |
| ENDSART00000013605  | zbtb20            | 0.00075553  | 0.021191929  | 0.070670156  | 0.462529396  | 0.345025042  | target selection  |
| ENDSART00000165877  | purg              | 0.000570625 | -0.159238984 | -0.087175961 | 1.048436006  | 0.831059287  | target selection  |
| ENDSART00000000280  | stat1b            | 0.037541166 | -0.005066017 | 0.035352481  | 0.819259146  | 0.412054224  | target selection  |
| ENDSART000000087450 | klf13             | 0.013792445 | -0.22166629  | -0.059571459 | 0.622443971  | 0.288396102  | target selection  |
| ENDSART00000146180  | csmp2             | 0.003710792 | 0.237147162  | 0.374829692  | 0.697707124  | 0.402573932  | target selection  |
| ENDSART00000026992  | sox4a             | 3.66E-05    | 0.168735758  | 0.553498244  | 0.871364123  | 0.630648218  | target selection  |
| ENDSART00000048110  | six4b             | 0.002795018 | 0.757934328  | 2.322346312  | 2.776043581  | 1.88012445   | target selection  |
| ENDSART000000013961 | mycla             | 0.015752787 | 0.091841991  | 0.503579515  | 0.855574629  | 0.294011787  | target selection  |
| ENDSART00000165656  | mxid3             | 6.24E-05    | 0.030444632  | 0.928898979  | 1.014066924  | 0.787179484  | target selection  |
| ENDSART00000018150  | neurod6b          | 0.012342358 | 0.484226112  | 1.695956927  | 1.935318885  | 1.555476315  | target selection  |
| ENDSART00000084819  | arhgap35b         | 0.001659006 | 0.101645005  | 0.291379647  | 0.535032879  | 0.462050203  | target selection  |
| ENDSART00000075331  | insm1b            | 0.009480138 | 0.180818368  | 0.558805202  | 0.852549514  | 0.856981121  | target selection  |
| ENDSART00000123147  | zbtb8a            | 0.026040305 | -0.281752517 | 0.027773484  | 0.518421131  | 0.366031095  | target selection  |
| ENDSART00000018945  | meis3             | 0.00431294  | -0.263611366 | 0.389783427  | 1.01804147   | 0.898863275  | target selection  |
| ENDSART00000111014  | myca              | 0.024986086 | -0.198726525 | 0.073855205  | 0.316369866  | 0.312548093  | target selection  |
| ENDSART00000092690  | srefb2            | 0.003411856 | -0.007030288 | 0.441941306  | 0.773565631  | 0.436893785  | target selection  |
| ENDSART00000104712  | hmg20a            | 0.038745219 | 0.003064442  | 0.120221197  | 0.366113134  | 0.275609671  | target selection  |
| ENDSART00000033755  | homezb            | 0.043076195 | -0.059847052 | 0.060728596  | 0.214721864  | 0.105513871  | target selection  |
| ENDSART00000047724  | zeb1b             | 0.032175544 | -0.128023017 | -0.020882446 | 0.202453179  | 0.103960026  | target selection  |
| ENDSART00000085728  | kif8              | 0.014069453 | -0.229536876 | -0.061888352 | 0.204863755  | 0.114771443  | target selection  |
| ENDSART00000037516  | znf827            | 0.032136194 | 0.117251719  | -0.001942433 | 0.235271462  | 0.223866066  | target selection  |
| ENDSART00000150128  | foxp1b            | 0.020184087 | 0.347545443  | 0.556370195  | 1.342974258  | 1.269825931  | target selection  |
| ENDSART00000128174  | foxp1b            | 0.015925333 | 0.060807795  | 0.283454627  | 0.694455914  | 0.748409918  | target selection  |
| ENDSART00000060193  | thap3             | 0.039451639 | 0.219009088  | 0.189913345  | 0.546438828  | 0.599142566  | target selection  |
| ENDSART00000154730  | tsc22d1           | 0.044459756 | 0.125146937  | 0.071380598  | 0.346511952  | 0.250641998  | target selection  |
| ENDSART00000114246  | adnpb             | 0.022770625 | -0.221340948 | -0.183838281 | -0.013868823 | 0.044049817  | brain innervation |
| ENDSART00000109356  | klf7a             | 0.000177237 | -0.7063233   | -0.659659661 | -0.044315321 | 0.157900055  | brain innervation |
| ENDSART00000144186  | pou6f2            | 7.05E-05    | -0.474463335 | -0.465571046 | 0.092941552  | 0.436081081  | brain innervation |
| ENDSART00000124112  | pou4f2            | 2.95E-05    | -1.368026557 | -1.308261738 | 0.344262724  | 0.908586045  | brain innervation |
| ENDSART00000051693  | irx4a             | 0.000591404 | -1.596922819 | -2.014349322 | 0.164610846  | 0.924604512  | brain innervation |
| ENDSART00000149175  | pou4f3            | 3.34E-05    | -1.520089487 | -1.231379123 | 0.357488642  | 0.743891028  | brain innervation |
| ENDSART00000055936  | isl2b             | 4.92E-05    | -1.527471977 | -1.312125436 | 0.470803449  | 0.853726063  | brain innervation |
| ENDSART00000023038  | dacha             | 0.000322945 | -0.511894205 | -0.418991667 | -0.004522839 | 0.112876213  | brain innervation |
| ENDSART00000142087  | foxp2             | 0.000565675 | -0.522019738 | -0.4194261   | 0.065656049  | 0.27497631   | brain innervation |
| ENDSART00000100508  | ebf1b             | 0.010170292 | -0.252122108 | -0.356560297 | -0.077233007 | 0.218128715  | brain innervation |
| ENDSART00000162485  | pax6a             | 0.013416969 | -0.383059238 | -0.321515523 | -0.107334897 | 0.077147684  | brain innervation |
| ENDSART00000112529  | znf319a           | 0.023015173 | -0.271600655 | -0.228932764 | -0.01869534  | 0.01981331   | brain innervation |
| ENDSART00000165609  | barhl2            | 0.000401616 | -0.31272019  | -0.374018735 | 0.126371762  | 0.224852149  | brain innervation |
| ENDSART00000010896  | isl1              | 0.002539705 | -0.281634356 | -0.275090348 | 0.147086866  | 0.205392134  | brain innervation |
| ENDSART00000145072  | neurod4           | 0.04301836  | -0.171174556 | -0.165007281 | 0.082300141  | 0.101934405  | brain innervation |
| ENDSART00000165774  | pax6a             | 0.007156543 | -0.382942423 | -0.218376905 | 0.094924321  | 0.282463268  | brain innervation |
| ENDSART00000101316  | znf618            | 0.019075692 | -0.33316659  | -0.306975689 | -0.091658088 | 0.079150867  | brain innervation |
| ENDSART00000064833  | mafaa             | 0.002047801 | -0.957052225 | -1.143383392 | -0.379735148 | 0.067354966  | brain innervation |
| ENDSART00000004548  | barhl1b           | 0.009605408 | -2.472825095 | -1.41656094  | -0.268019579 | 0.230183047  | brain innervation |
| ENDSART00000006380  | tbx3a             | 0.004106215 | -0.244591708 | -0.352646993 | -0.144447405 | 0.06961498   | brain innervation |
| ENDSART000000101070 | dachd             | 0.00434437  | -0.296270747 | -0.351582482 | -0.130791564 | -0.009393292 | brain innervation |
| ENDSART00000151904  | foxn3             | 0.000466769 | -0.402174688 | -0.533042351 | -0.141780798 | 0.022724604  | brain innervation |
| ENDSART00000124751  | kcnip3b           | 2.63E-05    | -1.29606503  | -1.383048631 | -0.490749215 | -0.039127508 | brain innervation |
| ENDSART00000151571  | ahdc1             | 0.000666959 | -0.753523402 | -0.774930454 | -0.265860844 | -0.025283973 | brain innervation |
| ENDSART00000080808  | six3a             | 0.000687981 | -0.437705937 | -0.430575558 | -0.140593988 | -0.07114268  | brain innervation |
| ENDSART00000171594  | mef2aa            | 0.010231208 | -0.649844171 | -0.685014218 | -0.301258241 | -0.003741614 | brain innervation |
| ENDSART00000062982  | foxb3b            | 0.005646833 | -0.232285352 | -0.219543276 | -0.013673206 | 0.18814406   | brain innervation |
| ENDSART00000009691  | scml4             | 0.001274316 | -0.348233268 | -0.325522885 | -0.113421585 | 0.115178638  | brain innervation |
| ENDSART00000160784  | satb1b            | 0.006456063 | -0.404843174 | -0.932859181 | 0.352272227  | 0.695966701  | brain innervation |
| ENDSART00000101631  | satb1b            | 0.000172812 | -0.360112936 | -0.384116906 | 0.134197196  | 0.481946288  | brain innervation |

|                     |                 |             |              |              |              |               |                   |
|---------------------|-----------------|-------------|--------------|--------------|--------------|---------------|-------------------|
| ENS DART0000014894  | bcl11ba         | 3.52E-05    | -0.656989822 | -0.679320488 | 0.181338486  | 0.623847694   | brain innervation |
| ENS DART00000165698 | pbx1a           | 0.000272902 | -0.205212048 | -0.330154536 | 0.047550564  | 0.321002436   | brain innervation |
| ENS DART00000081170 | cux1a           | 0.000900234 | -0.092953946 | -0.2283391   | 0.138990685  | 0.296890549   | brain innervation |
| ENS DART00000160675 | dpp1            | 0.00210146  | -0.344267461 | -0.462495684 | 0.239034332  | 0.46811192    | brain innervation |
| ENS DART00000045628 | irx6a           | 0.000781013 | -0.424070635 | -0.239579413 | 0.17038084   | 0.276181325   | brain innervation |
| ENS DART00000048994 | pbx3b           | 0.000910662 | -0.545498331 | -0.428509616 | 0.129533791  | 0.149586816   | brain innervation |
| ENS DART00000077157 | six3b           | 0.008086296 | -0.273810969 | -0.17356253  | 0.033591817  | 0.098241195   | brain innervation |
| ENS DART00000136245 | cux1a           | 0.013366886 | -0.163227222 | -0.237382603 | -0.00302824  | 0.164419575   | brain innervation |
| ENS DART00000154646 | bcl11ba         | 0.001677265 | -0.533670184 | -0.516802708 | 0.152594691  | 0.570166001   | brain innervation |
| ENS DART00000153150 | myt11a          | 0.001328724 | -0.378588425 | -0.355041474 | 0.131237693  | 0.393706803   | brain innervation |
| ENS DART00000166565 | tszh3b          | 0.011919383 | -0.202679362 | -0.107608077 | 0.106987356  | 0.28761259    | brain innervation |
| ENS DART00000013148 | pou3f1          | 0.00849815  | -0.360437586 | -0.322601739 | -0.060819622 | 0.211329038   | brain innervation |
| ENS DART00000162945 | sox5            | 0.023596757 | -0.177385379 | -0.174200373 | -0.003535976 | 0.152149827   | brain innervation |
| ENS DART00000171091 | zeb2b           | 0.008482497 | -0.344020449 | -0.404143226 | -0.222307379 | 0.140992606   | brain innervation |
| ENS DART00000170631 | ebf1a           | 0.016255169 | -0.245696473 | -0.326200552 | -0.132641619 | 0.115308885   | brain innervation |
| ENS DART00000156464 | prr12b          | 0.021599545 | -0.068684116 | -0.215586059 | 0.031477455  | 0.130187301   | brain innervation |
| ENS DART00000167440 | zfhx3           | 0.018342429 | -0.067144102 | -0.226395353 | 0.21751863   | 0.266797189   | brain innervation |
| ENS DART00000167538 | lcor            | 0.031258003 | -0.151917658 | -0.14482463  | 0.130691961  | 0.223379898   | brain innervation |
| ENS DART00000165223 | pbx1b           | 0.015188807 | -0.243991197 | -0.377373898 | -0.18693501  | 0.141565589   | brain innervation |
| ENS DART00000172410 | jazf1a          | 0.045787549 | -0.354446023 | -0.388940674 | -0.011638795 | -0.018894552  | brain innervation |
| ENS DART00000022010 | hivep2b         | 0.004657196 | -0.404683257 | -0.428225913 | -0.085969125 | 0.061919909   | brain innervation |
| ENS DART00000138048 | pbx3b           | 0.007841242 | -0.596555595 | -0.602159282 | -0.228775798 | -0.0190503135 | brain innervation |
| ENS DART00000137355 | tet3            | 0.033062691 | -0.245273707 | -0.407219331 | -0.050664281 | -0.06569376   | brain innervation |
| ENS DART00000104790 | zfn292b         | 0.044988705 | -0.062768954 | -0.233087007 | -0.040681021 | 0.023710275   | brain innervation |
| ENS DART00000136729 | ebf1b           | 0.021027344 | -2.79991744  | -3.068779235 | -0.720206417 | 0.313112936   | brain innervation |
| ENS DART00000132589 | mef2d           | 0.028030725 | -0.20910625  | -0.209165039 | -0.020444617 | 0.107291243   | brain innervation |
| ENS DART00000038884 | myrn            | 0.033340088 | -0.108806257 | -0.247003557 | 0.197551703  | 0.151198862   | brain innervation |
| ENS DART00000104327 | vsx1            | 0.00488592  | -0.248525466 | -0.619641572 | -0.034766195 | -0.028538746  | brain innervation |
| ENS DART00000084035 | zfn532          | 0.047492859 | -0.199573234 | -0.524026601 | -0.06012509  | 0.154210784   | brain innervation |
| ENS DART00000134064 | mxd1            | 0.015571917 | -0.125104323 | -0.265030232 | -0.047451672 | 0.092856449   | brain innervation |
| ENS DART00000136759 | prdm13          | 0.00326136  | -0.225066145 | -0.413438688 | -0.129520305 | 0.036146962   | brain innervation |
| ENS DART00000166540 | kcnip3b         | 0.047816671 | -0.988549414 | -0.704807394 | -0.278733631 | 0.119291619   | brain innervation |
| ENS DART00000030773 | foxa3a          | 0.000701449 | -0.522674186 | -0.346284342 | -0.025883071 | 0.086783781   | brain innervation |
| ENS DART00000111842 | sall1a          | 0.033435193 | -0.3702182   | -0.245271728 | -0.043742586 | 0.007554245   | brain innervation |
| ENS DART00000166976 | esrrb           | 0.030820243 | -0.481593528 | -0.114040699 | 0.229959907  | 0.235353141   | brain innervation |
| ENS DART00000151575 | thraa           | 0.013354221 | -0.36498113  | -0.584870078 | 0.329302923  | -0.150628947  | brain innervation |
| ENS DART00000007806 | zbtb16a         | 0.004364661 | -0.634450415 | -0.731920804 | 0.190781828  | -0.364381887  | brain innervation |
| ENS DART00000125158 | zfn574          | 0.029152083 | -0.158249462 | -0.223654122 | 0.188172427  | 0.054732788   | brain innervation |
| ENS DART00000011890 | zbtb22a         | 0.03843558  | -0.42030539  | -0.536466631 | 0.147549186  | 0.05725602    | brain innervation |
| ENS DART00000155866 | zbtb16b         | 8.49E-05    | -0.434457287 | -0.595844526 | 0.044569606  | 0.015262284   | brain innervation |
| ENS DART00000001795 | sp3a            | 0.0407578   | -0.269877105 | -0.305437708 | -0.047306155 | -0.033496274  | brain innervation |
| ENS DART00000109493 | tszh2           | 0.008648063 | -0.247840671 | 0.10394662   | 0.365597315  | 0.467215515   | brain innervation |
| ENS DART00000083296 | ZNF423          | 0.00814358  | -0.278315489 | 0.051691519  | 0.407184973  | 0.489807123   | brain innervation |
| ENS DART00000058685 | zfp2a           | 0.011667422 | -0.080421638 | -0.032548615 | 0.512175645  | 0.757319343   | brain innervation |
| ENS DART00000110069 | CABZ01075131.1  | 0.008675958 | -0.117445692 | -0.062527677 | 0.307574487  | 0.429328576   | brain innervation |
| ENS DART00000131126 | bcl6a           | 0.005688069 | -0.096649799 | -0.044696983 | 0.295011601  | 0.436349263   | brain innervation |
| ENS DART00000111303 | rfx7            | 0.00161581  | 0.075232989  | 0.085195342  | 0.459783838  | 0.727409902   | brain innervation |
| ENS DART00000122101 | tbx2b           | 0.001190205 | -0.056468629 | 0.017248499  | 0.19422425   | 0.382938949   | brain innervation |
| ENS DART00000065139 | gfi1lab         | 0.023335678 | -0.252440054 | -0.123023724 | 0.269699656  | 0.68808671    | brain innervation |
| ENS DART00000150068 | sox6            | 0.001331938 | -0.111707858 | -0.047191704 | 0.355284385  | 0.700337568   | brain innervation |
| ENS DART00000012862 | isl2a           | 3.29E-05    | -0.663813396 | 0.011664777  | 0.746201858  | 1.074694305   | brain innervation |
| ENS DART00000158634 | ebf3a           | 0.006418819 | -0.930015824 | -0.218309076 | 0.836197649  | 1.139950385   | brain innervation |
| ENS DART00000166502 | satb2           | 1.14E-05    | -0.540440017 | -0.158642442 | 1.216799418  | 1.496340928   | brain innervation |
| ENS DART00000025031 | pou4f1          | 1.46E-05    | -0.37458842  | -0.169318799 | 0.774588614  | 1.160187758   | brain innervation |
| ENS DART00000016303 | irx2a           | 4.96E-05    | -0.381386746 | 0.064410059  | 0.752093904  | 0.989751717   | brain innervation |
| ENS DART00000098859 | neurod6a        | 0.000108364 | -0.523659161 | -0.308368621 | 0.583701544  | 0.979244768   | brain innervation |
| ENS DART00000031167 | tfap2d          | 0.000251123 | -0.967562253 | -0.629795841 | 0.638492839  | 1.047009841   | brain innervation |
| ENS DART00000006612 | tbr1b           | 2.95E-05    | -1.166029945 | -1.008207372 | 0.617040877  | 1.169470893   | brain innervation |
| ENS DART00000157855 | ebf3a           | 0.000670771 | -0.765871102 | -0.436598509 | 0.580406091  | 0.942511549   | brain innervation |
| ENS DART00000167324 | ebf3a           | 4.92E-05    | -0.585714789 | -0.243731213 | 0.563349846  | 0.843370215   | brain innervation |
| ENS DART00000128504 | si:key-106g10.7 | 0.03328728  | 0.018091706  | 0.0404047    | 0.309180984  | 0.459844792   | brain innervation |
| ENS DART00000165955 | zhx3            | 0.013572162 | -0.011624436 | -0.109014479 | 0.013312322  | 0.351264725   | brain innervation |
| ENS DART00000092357 | sgsm2           | 0.018543094 | -0.379055867 | -0.375730796 | -0.097265456 | -0.053118339  | brain innervation |
| ENS DART00000170400 | ahdc1           | 0.034543013 | -2.952674589 | -2.088515533 | 0.893679477  | 1.203421878   | brain innervation |
| ENS DART00000150949 | nfyc            | 0.013743075 | -0.535274529 | -0.301463031 | -0.212807295 | 0.074596031   | brain innervation |
| ENS DART00000166351 | nkrf            | 0.010292856 | -0.332043429 | -0.213944917 | -0.117297764 | -0.03436019   | brain innervation |
| ENS DART00000090019 | zeb2b           | 0.016845819 | -0.694941899 | -0.428168304 | -0.296660745 | 0.024845807   | brain innervation |
| ENS DART00000018603 | tbx4            | 0.04873911  | -0.302508569 | -0.188111077 | -0.131947864 | 0.000377602   | brain innervation |
| ENS DART00000171642 | dpp1            | 0.005353377 | -0.380689139 | 0.060927985  | 0.320062308  | 0.358114425   | brain innervation |
| ENS DART00000113087 | hm1             | 0.000694227 | -0.389387565 | 0.021377927  | 0.234018679  | 0.270888749   | brain innervation |
| ENS DART00000162474 | irx1a           | 0.002931603 | -1.132797992 | -0.349993381 | 0.581252213  | 0.55366573    | brain innervation |
| ENS DART00000162805 | irx3a           | 0.000148815 | -0.694816328 | -0.301932125 | 0.187764734  | 0.208405543   | brain innervation |
| ENS DART00000172990 | zfn628          | 0.031889344 | -0.174846517 | -0.081526828 | 0.094662541  | 0.071436879   | brain innervation |



|                     |                  |             |              |              |              |              |                                           |
|---------------------|------------------|-------------|--------------|--------------|--------------|--------------|-------------------------------------------|
| ENS DART00000112756 | ZNF608           | 0.004908881 | -0.246715323 | -0.122479962 | 0.171371612  | 0.114220238  | brain innervation                         |
| ENS DART00000090226 | znf319b          | 0.009551702 | -0.155602419 | -0.092883138 | 0.255379558  | 0.168359048  | brain innervation                         |
| ENS DART00000053782 | scrt2            | 0.003310987 | -0.252422437 | -0.133353661 | 0.196438899  | 0.160308382  | brain innervation                         |
| ENS DART00000100658 | esrra            | 8.74E-05    | -0.571475474 | -0.395296451 | 0.169003635  | 0.212368184  | brain innervation                         |
| ENS DART0000008906  | znf503           | 0.001473115 | -0.367880648 | -0.389528031 | 0.161538025  | 0.1844463    | brain innervation                         |
| ENS DART00000164488 | mbnl2            | 0.0337199   | -3.245293256 | -3.314362259 | 0.902121491  | 1.413765252  | brain innervation                         |
| ENS DART00000130163 | nr2f2            | 0.012656704 | -0.280168769 | -0.057880311 | 0.350863039  | 0.468160546  | brain innervation                         |
| ENS DART00000074833 | rx3              | 0.010379183 | -0.279918529 | -0.301637969 | 0.143576872  | 0.172520697  | brain innervation                         |
| ENS DART00000006737 | sox5             | 0.038386468 | -0.253791611 | -0.278700286 | 0.184042389  | 0.275951824  | brain innervation                         |
| ENS DART00000109347 | nacc2            | 0.002373876 | -0.303011569 | -0.338345203 | 0.399887844  | 0.337648971  | brain innervation                         |
| ENS DART00000133959 | clockb           | 0.010583972 | -0.261160651 | -0.146340415 | 0.224249915  | 0.15359596   | brain innervation                         |
| ENS DART00000108775 | ubp1             | 0.021499635 | -0.192682892 | -0.115240547 | 0.10453418   | 0.097860664  | brain innervation                         |
| ENS DART00000092665 | sreb1            | 0.004619636 | -0.417658309 | -0.274360919 | 0.114636817  | 0.022214824  | brain innervation                         |
| ENS DART00000104751 | mx1              | 0.002350825 | -0.384587031 | -0.210909301 | 0.22179917   | 0.104111801  | brain innervation                         |
| ENS DART00000131714 | mbnl2            | 0.008848885 | -0.406601788 | -0.032543807 | -0.091713267 | 0.092369986  | brain innervation                         |
| ENS DART00000124534 | mbnl2            | 0.001000183 | -0.407254222 | 0.078580914  | -0.044925118 | 0.120266311  | brain innervation                         |
| ENS DART00000155666 | znf576.1         | 0.015256508 | -0.372721752 | -0.23410815  | -0.134923201 | -0.013577883 | brain innervation                         |
| ENS DART00000047541 | bach1b           | 0.039802589 | -0.343772395 | -0.510091534 | -0.468889885 | -0.333515696 | downregulated during regeneration - early |
| ENS DART00000007630 | nhlh2            | 0.010056242 | -0.28794611  | -0.324673306 | -0.385652145 | -0.261092419 | downregulated during regeneration - early |
| ENS DART00000129498 | mef2d            | 0.03679078  | -0.188451231 | -0.381445449 | -0.263610552 | -0.197973462 | downregulated during regeneration - early |
| ENS DART00000055890 | znf385c          | 0.011543549 | -0.397413591 | -0.444425008 | -0.419820845 | -0.297765515 | downregulated during regeneration - early |
| ENS DART00000024832 | stat5a           | 0.004077075 | -0.212236095 | -0.408877789 | -0.375060924 | -0.185569558 | downregulated during regeneration - early |
| ENS DART00000082346 | tfap2a           | 0.038054224 | -0.238141907 | -0.307957291 | -0.242159487 | -0.230339237 | downregulated during regeneration - early |
| ENS DART00000013003 | tfap2b           | 0.008192536 | -0.299930992 | -0.578681033 | -0.25971747  | -0.279510711 | downregulated during regeneration - early |
| ENS DART00000167052 | etv1             | 0.01072353  | -0.327639473 | -0.469002174 | -0.32895701  | -0.22464313  | downregulated during regeneration - early |
| ENS DART00000157659 | camta1b          | 0.01608096  | -0.574265168 | -0.690891494 | -0.316064045 | -0.339000781 | downregulated during regeneration - early |
| ENS DART00000169609 | tefb             | 0.032368681 | -0.156114581 | -0.555141888 | -0.301378906 | -0.24132076  | downregulated during regeneration - early |
| ENS DART00000103640 | hey1             | 0.023203992 | -0.386569584 | -0.747117397 | -0.392306381 | -0.416692063 | downregulated during regeneration - early |
| ENS DART00000089748 | rorb             | 0.030623213 | -0.330969943 | -0.539847879 | -0.425468683 | -0.138099942 | downregulated during regeneration - early |
| ENS DART00000122429 | klf15            | 0.006222767 | -0.341190152 | -0.616050077 | -0.578895446 | -0.337948098 | downregulated during regeneration - early |
| ENS DART00000153187 | thrab            | 0.001402519 | -0.362356661 | -0.551240408 | -0.403932333 | -0.192068079 | downregulated during regeneration - early |
| ENS DART00000054736 | bhlhe23          | 0.004928313 | -0.369485488 | -0.514619457 | -0.390416516 | -0.190127988 | downregulated during regeneration - early |
| ENS DART00000125344 | skilb            | 0.010360832 | -0.241964121 | -0.627384358 | -0.493621211 | -0.368838752 | downregulated during regeneration - early |
| ENS DART00000131361 | kcnip3b          | 0.008595135 | -0.353450144 | -0.608912483 | -0.692091767 | -0.071599751 | downregulated during regeneration - early |
| ENS DART00000026017 | bhlhe40          | 0.046057741 | -0.186426622 | -0.329757373 | -0.286559283 | -0.071751826 | downregulated during regeneration - early |
| ENS DART00000131134 | si:ch211-206a7.2 | 0.008848885 | -0.226522125 | -0.472315068 | -0.371394997 | -0.101330709 | downregulated during regeneration - early |
| ENS DART00000046663 | camta1b          | 0.022220725 | -0.175908238 | -0.543108898 | -0.289499765 | -0.001152787 | downregulated during regeneration - early |
| ENS DART00000172199 | zmat4a           | 0.029447477 | -0.170025595 | -0.220098279 | -0.198411401 | 0.018178403  | downregulated during regeneration - early |
| ENS DART00000142223 | hivep3b          | 0.013948629 | -0.312228644 | -0.441058379 | -0.334712198 | -0.18438466  | downregulated during regeneration - early |
| ENS DART00000147658 | bhlhe22          | 0.01205445  | -0.302235414 | -0.31899187  | -0.305987775 | -0.102192149 | downregulated during regeneration - early |
| ENS DART00000126966 | esrrga           | 0.017679749 | -0.248566713 | -0.265310961 | -0.321308408 | -0.070523791 | downregulated during regeneration - early |
| ENS DART00000127353 | nr1d2b           | 0.027085654 | -0.29103008  | -0.243688493 | -0.346507775 | -0.100908835 | downregulated during regeneration - early |
| ENS DART00000040672 | mecp2            | 0.047533941 | -0.242382035 | -0.413395534 | -0.149398689 | -0.148226048 | downregulated during regeneration - early |
| ENS DART00000057644 | lhx4             | 0.048389146 | -0.267668007 | -0.268543602 | -0.190125613 | -0.119751289 | downregulated during regeneration - early |
| ENS DART00000089923 | znf652           | 0.026337068 | -0.30560984  | -0.322535846 | -0.127141181 | -0.092457617 | downregulated during regeneration - early |
| ENS DART00000157890 | tcf7l1b          | 0.035686017 | -4.555123239 | -4.673271453 | -1.829433189 | -0.732249154 | downregulated during regeneration - early |
| ENS DART00000136488 | zmat4a           | 0.008573382 | -0.690962776 | -0.637104526 | -0.28999313  | -0.088561559 | downregulated during regeneration - early |
| ENS DART00000164349 | e2f4             | 0.042377891 | -0.246759183 | -0.226331986 | -0.10688884  | -0.101679787 | downregulated during regeneration - early |
| ENS DART00000003548 | znf385a          | 0.001069696 | -0.544726233 | -0.63515273  | -0.316063497 | -0.128464507 | downregulated during regeneration - early |
| ENS DART00000033362 | gatad2b          | 0.00857344  | -0.40244942  | -0.286045422 | -0.214483951 | -0.084688348 | downregulated during regeneration - early |
| ENS DART00000026865 | l3mbtl1a         | 0.016106242 | -0.339631378 | -0.338161449 | -0.153879513 | -0.055902641 | downregulated during regeneration - early |
| ENS DART00000037879 | crx              | 0.018920791 | -0.254014844 | -0.310425293 | -0.22793154  | -0.020194538 | downregulated during regeneration - early |
| ENS DART00000135443 | kdm5ba           | 0.039457626 | -0.212935098 | -0.210173481 | -0.205976005 | -0.095029648 | downregulated during regeneration - early |
| ENS DART00000165757 | pax6b            | 0.019981901 | -1.030621281 | -0.736504391 | -0.510180699 | -0.112500923 | downregulated during regeneration - early |
| ENS DART00000059446 | znf385b          | 0.027304375 | -0.260906147 | -0.315001382 | -0.161772411 | -0.110285684 | downregulated during regeneration - early |
| ENS DART00000165120 | purab            | 0.041240008 | -0.246648902 | -0.188751457 | -0.157104845 | -0.035763175 | downregulated during regeneration - early |
| ENS DART00000009938 | tcf12            | 0.025246927 | -0.385864267 | -0.351608927 | -0.283149928 | -0.323464659 | downregulated during regeneration - early |
| ENS DART00000048775 | mbd3b            | 0.027491007 | -0.291847963 | -0.361950456 | -0.358913558 | -0.222238531 | downregulated during regeneration - early |
| ENS DART00000156351 | zfat             | 0.027293911 | -0.386268069 | -0.362611932 | -0.387180541 | -0.301395116 | downregulated during regeneration - early |
| ENS DART00000166135 | zbtb47b          | 0.004311817 | -0.402709337 | -0.209852132 | -0.474957603 | -0.394147628 | downregulated during regeneration - early |
| ENS DART00000055706 | her15.1          | 0.021144178 | -1.483608056 | -1.154441068 | -0.698110478 | -1.436427969 | downregulated during regeneration - early |
| ENS DART00000133487 | fosb             | 0.034512759 | -0.882572207 | -1.273781011 | -0.772506712 | -0.914864674 | downregulated during regeneration - early |
| ENS DART00000000876 | nr4a1            | 0.000894056 | -2.262372442 | -2.399082592 | -2.145415905 | -1.543723254 | downregulated during regeneration - early |
| ENS DART00000151127 | thraa            | 0.039890399 | -0.798583389 | -0.802364861 | -0.351487338 | -0.589241182 | downregulated during regeneration - early |
| ENS DART00000162857 | nr4a3            | 0.003361003 | -1.482016444 | -1.152680943 | -0.606031454 | -1.193862677 | downregulated during regeneration - early |
| ENS DART00000153167 | hlfb             | 0.010966965 | -0.470839666 | -0.326611575 | -0.235752692 | -0.264047019 | downregulated during regeneration - early |
| ENS DART00000065361 | etv5b            | 0.019698661 | -0.645686026 | -0.347502384 | -0.293939032 | -0.317696675 | downregulated during regeneration - early |
| ENS DART00000162387 | zbtb38           | 0.015925333 | -0.362042869 | -0.285747988 | -0.199364681 | -0.27814593  | downregulated during regeneration - early |
| ENS DART00000172310 | zbtb4            | 0.013310088 | -0.365422353 | -0.277101341 | -0.237436935 | -0.247791483 | downregulated during regeneration - early |
| ENS DART00000054020 | hivep3b          | 0.042576139 | 0.041000622  | -0.364922266 | -0.147208921 | -0.149490959 | downregulated during regeneration - mid   |
| ENS DART00000169283 | znf644b          | 0.046753078 | 0.013670999  | -0.206539721 | -0.202072284 | -0.100289754 | downregulated during regeneration - mid   |
| ENS DART00000161387 | tcf12            | 0.008531138 | 0.370378706  | 0.009395421  | -0.374363269 | -0.152945712 | downregulated during regeneration - mid   |
| ENS DART00000127099 | nr2e3            | 0.030676359 | 0.281603482  | 0.002911001  | -0.560613973 | -0.033774044 | downregulated during regeneration - mid   |

|                    |         |             |              |              |              |              |                                          |
|--------------------|---------|-------------|--------------|--------------|--------------|--------------|------------------------------------------|
| ENSDART00000163250 | mef2cb  | 0.003671994 | 0.361224616  | -0.300957895 | -0.57227951  | -0.080214844 | downregulated during regeneration - mid  |
| ENSDART00000131731 | mef2ca  | 0.006008543 | 0.234535922  | -0.250149626 | -0.381098175 | -0.047609857 | downregulated during regeneration - mid  |
| ENSDART00000113286 | phf19   | 0.035367252 | 0.32344819   | -0.020838317 | -0.493273441 | -0.244699917 | downregulated during regeneration - mid  |
| ENSDART00000093331 | rreb1a  | 0.018126285 | -0.024901133 | -0.155149005 | -0.517234878 | -0.050769944 | downregulated during regeneration - mid  |
| ENSDART00000104279 | znf516  | 0.018737197 | -0.151066862 | -0.30868422  | -0.587761132 | -0.246031248 | downregulated during regeneration - mid  |
| ENSDART00000143165 | tsc22d1 | 0.012984014 | -0.098364585 | -0.21923408  | -0.39849137  | 0.017570634  | downregulated during regeneration - mid  |
| ENSDART00000148537 | rora    | 0.01612441  | -0.160828233 | -0.221872095 | -0.45696721  | -0.083100906 | downregulated during regeneration - mid  |
| ENSDART00000100667 | skia    | 0.021156666 | -0.180939747 | -0.108825609 | -0.328725059 | -0.076853639 | downregulated during regeneration - mid  |
| ENSDART00000123970 | mntb    | 0.011725523 | -0.115861458 | -0.101461538 | -0.360694649 | -0.01567692  | downregulated during regeneration - mid  |
| ENSDART00000077839 | atf7b   | 0.014656899 | -0.232485852 | -0.196508033 | -0.391624214 | -0.206346003 | downregulated during regeneration - mid  |
| ENSDART00000165710 | gbbp11  | 0.036571732 | -0.164201122 | -0.182753901 | -0.290062625 | -0.125147623 | downregulated during regeneration - mid  |
| ENSDART00000124740 | ncoa2   | 0.048038072 | -0.028796998 | -0.187850383 | -0.230877254 | 0.045612327  | downregulated during regeneration - mid  |
| ENSDART00000164082 | znf609a | 0.041293307 | 0.094336402  | -0.129509301 | -0.187095832 | 0.037446717  | downregulated during regeneration - mid  |
| ENSDART00000045374 | smad3a  | 0.043076195 | -0.063329624 | -0.157712113 | -0.303211349 | -0.108940629 | downregulated during regeneration - mid  |
| ENSDART00000166313 | thrb    | 0.0223553   | -0.193382381 | -0.415286369 | -0.400030228 | -0.136855946 | downregulated during regeneration - mid  |
| ENSDART00000031426 | skilb   | 0.000177771 | -0.234186907 | -0.553407151 | -0.565936684 | -0.420869627 | downregulated during regeneration - mid  |
| ENSDART00000148106 | mef2aa  | 0.026582721 | -0.081330082 | -0.55524128  | -0.609035118 | -0.185252531 | downregulated during regeneration - mid  |
| ENSDART00000091707 | dbpa    | 0.017575469 | -0.158262702 | -0.327851995 | -0.357551076 | -0.129469939 | downregulated during regeneration - mid  |
| ENSDART00000148066 | znf395b | 0.020342933 | -0.110739145 | -0.366906743 | -0.460042969 | -0.183105049 | downregulated during regeneration - mid  |
| ENSDART00000075070 | hsf2    | 0.014034602 | -0.066635095 | -0.276496416 | -0.474097609 | -0.186498896 | downregulated during regeneration - mid  |
| ENSDART00000148353 | usf2    | 0.006964046 | -0.107987138 | -0.265954127 | -0.405201274 | -0.200197809 | downregulated during regeneration - mid  |
| ENSDART00000061106 | bhlhe41 | 0.000553147 | 0.043056173  | -0.423617996 | -0.754959095 | -0.246095493 | downregulated during regeneration - mid  |
| ENSDART00000139102 | dbpb    | 0.001993937 | 0.113164671  | -0.364559303 | -0.423196921 | -0.137052116 | downregulated during regeneration - mid  |
| ENSDART00000100181 | sall3b  | 0.034764006 | -0.170454734 | -0.209016072 | -0.285639823 | -0.232809645 | downregulated during regeneration - mid  |
| ENSDART00000141734 | hivep2a | 0.017814842 | -0.218148846 | -0.337091836 | -0.481607769 | -0.327040294 | downregulated during regeneration - mid  |
| ENSDART00000170575 | nfat5b  | 0.018611393 | -0.001493923 | -0.392122738 | -0.566909919 | -0.288747412 | downregulated during regeneration - mid  |
| ENSDART00000143874 | akna    | 0.021937256 | -0.124615674 | -0.323808831 | -0.482322372 | -0.23639171  | downregulated during regeneration - mid  |
| ENSDART00000127157 | hifa    | 0.048701514 | -0.089881453 | -0.212609643 | -0.346930267 | -0.147102401 | downregulated during regeneration - mid  |
| ENSDART00000126282 | nr1d1   | 0.008088213 | -0.1014969   | -0.191656676 | -0.494430716 | -0.13667305  | downregulated during regeneration - mid  |
| ENSDART00000078529 | kin     | 0.03060143  | -1.437736057 | -0.295663012 | -0.493580296 | -4.734617185 | downregulated during regeneration - late |
| ENSDART00000055709 | her2    | 0.030146589 | -0.984524994 | -0.833253569 | -0.717745512 | -1.233522642 | downregulated during regeneration - late |
| ENSDART00000023613 | her6    | 0.030622517 | -0.335042933 | -0.234567638 | -0.250120727 | -0.59712361  | downregulated during regeneration - late |
| ENSDART00000086051 | mecom   | 0.04049764  | -0.550304416 | -0.298852875 | -0.293768303 | -1.334615988 | downregulated during regeneration - late |
| ENSDART00000110544 | znf219  | 0.031344075 | -0.234403747 | -0.210413301 | -0.211690001 | -0.32688667  | downregulated during regeneration - late |
| ENSDART00000053367 | hmgn3   | 0.044180927 | -0.174648563 | -0.165335262 | -0.310027237 | -0.181225286 | downregulated during regeneration - late |
| ENSDART00000089015 | zbtb7a  | 0.00191624  | -0.478666207 | -0.203919761 | -0.738823143 | -0.713706626 | downregulated during regeneration - late |
| ENSDART00000164855 | creb12  | 0.013882038 | -0.127345071 | -0.2122205   | -0.432997567 | -0.264872881 | downregulated during regeneration - late |
| ENSDART00000066655 | mybl1   | 0.005666275 | -0.255810306 | -0.487313899 | -0.72749049  | -0.668391364 | downregulated during regeneration - late |
| ENSDART00000125174 | nr1i2   | 0.028902271 | -0.056601149 | -0.085618729 | -0.264588441 | -0.326132843 | downregulated during regeneration - late |
| ENSDART00000167844 | mafk    | 0.014095383 | -0.00863672  | 0.25450476   | -0.276014619 | -0.283559487 | downregulated during regeneration - late |
| ENSDART00000057124 | tefa    | 0.007560757 | -0.17959692  | 0.074135039  | -0.330628318 | -0.262330789 | downregulated during regeneration - late |
| ENSDART00000057125 | tefa    | 0.002939873 | -0.190705988 | 0.094171259  | -0.306461854 | -0.301060608 | downregulated during regeneration - late |
| ENSDART00000172251 | creb3l1 | 0.029283678 | -0.33540662  | 0.193573394  | -4.078076569 | -0.842213331 | downregulated during regeneration - late |
| ENSDART00000128815 | stra13  | 0.002651628 | 0.38711598   | 0.144426216  | -0.403589602 | -0.227357691 | downregulated during regeneration - late |
| ENSDART00000005263 | usf1l   | 0.019856195 | 0.061508869  | 0.080355717  | -0.137096705 | -0.208096843 | downregulated during regeneration - late |
| ENSDART00000044860 | maff    | 0.002310171 | 0.057535561  | 0.039208376  | -0.366680053 | -0.441007369 | downregulated during regeneration - late |
| ENSDART00000078781 | znf706  | 0.034124552 | 0.015897963  | -0.052514643 | -0.230153549 | -0.188792592 | downregulated during regeneration - late |

**Table S6. Differentially expressed transcripts that encode transcription factors with known motifs.**

| Ensembl ID         | zebrafish gene symbol | padj        | LFC: 2dpi-0dpi | LFC: 4dpi-0dpi | LFC: 7dpi-0dpi | LFC: 12dpi-0dpi | cluster name              |
|--------------------|-----------------------|-------------|----------------|----------------|----------------|-----------------|---------------------------|
| ENSDART00000140760 | e2f7                  | 0.044060134 | 0.798632306    | 0.496792942    | -0.026056819   | -0.454809271    | growth toward the midline |
| ENSDART00000056005 | ascl1a                | 0.032093457 | 1.787445127    | 1.283325532    | 0.749862779    | 0.792492648     | growth toward the midline |
| ENSDART00000128488 | e2f8                  | 0.003382652 | 3.852661131    | -0.929008264   | 3.252279997    | 2.01178299      | growth toward the midline |
| ENSDART00000132119 | max                   | 0.028918785 | 0.339991432    | 0.197083488    | 0.14057043     | 0.318686745     | growth toward the midline |
| ENSDART00000163794 | wt1b                  | 0.02934736  | 0.454982734    | 0.330694147    | 0.317167947    | 0.300420298     | growth toward the midline |
| ENSDART00000033494 | klf6a                 | 0.000170861 | 1.084550888    | 1.797692613    | 1.625562666    | 0.460444617     | growth toward the midline |
| ENSDART00000147849 | klf6a                 | 0.000870446 | 1.130982604    | 1.870693821    | 1.403514717    | 0.445060502     | growth toward the midline |
| ENSDART00000076161 | hoxb5b                | 0.013675681 | 2.652791903    | 3.351280664    | 2.618897772    | 0.864721852     | growth toward the midline |
| ENSDART00000122628 | junba                 | 0.016136147 | 0.280813702    | 0.583374691    | 0.41181471     | 0.073998168     | growth toward the midline |
| ENSDART00000146767 | fosl1a                | 0.046117855 | 0.841007094    | 1.285901651    | 0.733422298    | 0.173089455     | growth toward the midline |
| ENSDART00000161610 | tcf3b                 | 0.04032679  | 0.066966853    | 0.197082202    | 0.107652202    | -0.03222147     | growth toward the midline |
| ENSDART00000051549 | tp53                  | 0.029170799 | 0.110640197    | 0.281712522    | 0.180041895    | -0.162598759    | growth toward the midline |
| ENSDART00000164711 | NFATC2 (1 of many)    | 0.017032668 | 0.774520656    | 0.760515741    | 0.734404519    | 0.027133082     | growth toward the midline |
| ENSDART00000063912 | jun                   | 0.002341904 | 1.166146477    | 1.429328618    | 1.29995447     | 0.480560375     | growth toward the midline |
| ENSDART00000022060 | atf3                  | 2.20E-05    | 2.958540036    | 3.348918067    | 2.852908333    | 1.811501419     | growth toward the midline |
| ENSDART00000110040 | sox11a                | 8.49E-05    | 1.573346229    | 1.723237215    | 1.23195588     | 0.781584101     | growth toward the midline |
| ENSDART00000104519 | stat3                 | 0.004480141 | 0.6458865      | 0.459098575    | 0.438501049    | 0.201812376     | growth toward the midline |
| ENSDART00000142584 | alx1                  | 0.047364517 | 1.361674144    | 1.279023188    | 1.723053191    | -0.115335088    | growth toward the midline |
| ENSDART00000135381 | six4a                 | 0.04980099  | 2.521510715    | 2.3671408      | 2.587075649    | 1.691172374     | growth toward the midline |
| ENSDART00000012791 | sp8a                  | 0.049626195 | 1.57251014     | 2.331511764    | 2.00847442     | 1.039704847     | growth toward the midline |
| ENSDART00000160644 | rela                  | 0.030637152 | 0.027046368    | 0.222531925    | 0.299056597    | -0.13648552     | growth toward the midline |
| ENSDART00000010248 | mitfb                 | 0.042577687 | 0.302243319    | 0.237275907    | 0.106756262    | -0.337810921    | growth toward the midline |
| ENSDART00000157487 | tfec                  | 0.001790465 | 0.534318298    | 0.423012313    | 0.205933849    | -0.313187686    | growth toward the midline |
| ENSDART00000164766 | tfec                  | 0.012357429 | 0.976052476    | 1.18639141     | 0.809154671    | -1.643283392    | growth toward the midline |
| ENSDART00000158466 | creb3l2               | 0.011352496 | 0.073267533    | 0.091531466    | -0.07087733    | -0.32121815     | growth toward the midline |
| ENSDART00000152378 | tgif1                 | 0.003122803 | 0.194631245    | 0.419803811    | 0.14379228     | -0.205607529    | growth toward the midline |
| ENSDART00000062702 | cebpb                 | 0.018433591 | 0.973724375    | 0.549827472    | 0.384246832    | -0.627629236    | growth toward the midline |
| ENSDART00000056457 | mitfa                 | 0.005353377 | 0.929754118    | 0.38849893     | 0.30836176     | -0.311729197    | growth toward the midline |
| ENSDART00000080854 | stat3                 | 0.03033326  | 0.856010749    | 0.444560766    | 0.379796349    | -0.326021696    | growth toward the midline |
| ENSDART00000093279 | spi1b                 | 0.002640644 | 0.891535687    | 0.563855895    | 0.100587929    | -0.531177734    | growth toward the midline |
| ENSDART00000036729 | spi1b                 | 0.004358158 | 0.910663058    | 0.717004711    | 0.095052493    | -0.117318513    | growth toward the midline |
| ENSDART00000008373 | fosl1a                | 0.001576361 | 0.78271954     | 0.570182098    | 0.226810387    | -0.332448721    | growth toward the midline |
| ENSDART00000093199 | tead3b                | 0.016523707 | 1.081516431    | 0.86043279     | 0.478204597    | -0.215799128    | growth toward the midline |
| ENSDART00000017185 | tbx20                 | 0.035967167 | 0.559146809    | 0.370265655    | -0.151461394   | -0.656442573    | growth toward the midline |
| ENSDART00000052366 | cebpa                 | 0.035286858 | 0.847474055    | 0.814939712    | 0.318232429    | -0.173654256    | growth toward the midline |

|                    |         |             |              |              |              |              |                           |
|--------------------|---------|-------------|--------------|--------------|--------------|--------------|---------------------------|
| ENSDART0000005263  | usf1l   | 0.019856195 | 0.061508869  | 0.080355717  | -0.137096705 | -0.208096843 | growth toward the midline |
| ENSDART00000062854 | nfe2l2a | 0.008134819 | 0.155734951  | 0.146836561  | -0.112595282 | -0.207726174 | growth toward the midline |
| ENSDART00000138081 | bcl6ab  | 0.000589104 | 0.948060654  | 0.690527167  | 0.988530239  | 1.012261919  | midline crossing          |
| ENSDART00000104317 | klf7b   | 0.000976528 | 0.389436838  | 1.156291561  | 1.140404424  | 0.652703479  | midline crossing          |
| ENSDART00000124040 | insm1a  | 1.46E-05    | 0.50962443   | 1.551047216  | 1.738068624  | 1.104992333  | midline crossing          |
| ENSDART00000048110 | six4b   | 0.002795018 | 0.757934328  | 2.322346312  | 2.776043581  | 1.88012445   | midline crossing          |
| ENSDART00000159652 | sox4b   | 0.008897727 | 0.767109202  | 1.080655119  | 1.389017231  | 0.976257694  | midline crossing          |
| ENSDART00000092690 | srebf2  | 0.003411856 | -0.007030288 | 0.441941306  | 0.773565631  | 0.436893785  | midline crossing          |
| ENSDART00000033755 | homezb  | 0.043076195 | -0.059847052 | 0.060728596  | 0.214721864  | 0.105513871  | midline crossing          |
| ENSDART00000018945 | meis3   | 0.00431294  | -0.263611366 | 0.389783427  | 1.01804147   | 0.898863275  | midline crossing          |
| ENSDART00000075331 | insm1b  | 0.009480138 | 0.180818368  | 0.558805202  | 0.852549514  | 0.856981121  | midline crossing          |
| ENSDART00000150128 | foxp1b  | 0.020184087 | 0.347545443  | 0.556370195  | 1.342974258  | 1.269825931  | midline crossing          |
| ENSDART00000128174 | foxp1b  | 0.015925333 | 0.060807795  | 0.283454627  | 0.694455914  | 0.748409918  | midline crossing          |
| ENSDART00000023959 | arntl1a | 7.44E-05    | 0.340904931  | 1.030627189  | 1.45255612   | 0.975945139  | midline crossing          |
| ENSDART00000026992 | sox4a   | 3.66E-05    | 0.168735758  | 0.553498244  | 0.871364123  | 0.630648218  | midline crossing          |
| ENSDART00000083628 | ddit3   | 0.002192622 | -0.053032847 | 0.505000026  | 0.598711637  | 0.25299651   | midline crossing          |
| ENSDART00000110512 | ybx1    | 0.014352201 | 0.187678935  | 0.306636132  | 0.543417204  | 0.157462635  | midline crossing          |
| ENSDART00000141068 | sox11b  | 8.49E-05    | 1.611838536  | 2.177304965  | 2.010624009  | 1.194765222  | midline crossing          |
| ENSDART00000138821 | nfil3   | 0.000101984 | 1.376309909  | 2.121391468  | 1.99718084   | 1.39511595   | midline crossing          |
| ENSDART00000082434 | tgif1   | 1.75E-05    | 0.822910382  | 1.229522702  | 1.441745222  | 0.912580325  | midline crossing          |
| ENSDART00000139763 | stat5a  | 0.018355029 | 3.442434617  | 3.964844196  | 3.417693165  | 3.322184683  | midline crossing          |
| ENSDART00000055609 | atf4b   | 0.027440234 | 0.138344185  | 0.51758353   | 0.353617358  | 0.087935611  | midline crossing          |
| ENSDART00000152636 | clocka  | 0.010610046 | 0.008631834  | 0.196030905  | 0.593132542  | 0.426491394  | target selection          |
| ENSDART00000166976 | esrrb   | 0.030820243 | -0.481593528 | -0.114040699 | 0.229959907  | 0.235353141  | target selection          |
| ENSDART00000066317 | foxn2b  | 0.033486585 | -0.194754205 | -0.013664444 | 0.221561118  | -0.080707177 | target selection          |
| ENSDART00000104523 | arntl1b | 0.000255127 | -0.158144123 | 0.59291526   | 1.113237486  | 0.52944604   | target selection          |
| ENSDART00000133959 | clockb  | 0.010583972 | -0.261160651 | -0.146340415 | 0.224249915  | 0.15359596   | target selection          |
| ENSDART00000047724 | zeb1b   | 0.032175544 | -0.128023017 | -0.020882446 | 0.202453179  | 0.103960026  | target selection          |
| ENSDART00000085728 | klf8    | 0.014069453 | -0.229536876 | -0.061888352 | 0.204863755  | 0.114771443  | target selection          |
| ENSDART00000013605 | zbtb20  | 0.00075553  | 0.021191929  | 0.070670156  | 0.462529396  | 0.345025042  | target selection          |
| ENSDART00000087450 | klf13   | 0.013792445 | -0.22166629  | -0.059571459 | 0.622443971  | 0.288396102  | target selection          |
| ENSDART00000000280 | stat1b  | 0.037541166 | -0.005066017 | 0.035352481  | 0.819259146  | 0.412054224  | target selection          |
| ENSDART00000151575 | thraa   | 0.013354221 | -0.36498113  | -0.584870078 | 0.329302923  | -0.150628947 | target selection          |
| ENSDART00000154418 | relb    | 0.010687727 | -0.043359819 | 0.083083005  | 0.26390054   | -0.071618881 | target selection          |
| ENSDART00000123197 | relb    | 0.019118248 | -0.261655378 | -0.003226565 | 0.486237661  | -0.265984214 | target selection          |
| ENSDART00000152489 | irf3    | 0.006723268 | -0.152502705 | 0.050924712  | 1.421424509  | -0.375867622 | target selection          |
| ENSDART00000141792 | stat1b  | 0.033143681 | -1.394223287 | -0.705218411 | 2.324563925  | -0.328164239 | target selection          |
| ENSDART00000103622 | irf7    | 0.002828188 | -0.049332142 | -0.2878598   | 1.533925917  | -0.275107455 | target selection          |

|                    |                  |             |              |              |              |              |                   |
|--------------------|------------------|-------------|--------------|--------------|--------------|--------------|-------------------|
| ENSDART00000148661 | stat2            | 0.006978095 | 0.11967996   | -0.016653911 | 1.354000143  | 0.023510931  | target selection  |
| ENSDART00000005720 | stat1a           | 0.010250585 | 0.035880276  | 0.045195542  | 0.615137639  | 0.020671748  | target selection  |
| ENSDART00000156935 | pbx4             | 0.039411387 | 0.960146191  | 0.964981474  | 3.716226941  | 3.606625876  | target selection  |
| ENSDART00000025575 | clocka           | 0.041666185 | -0.204691736 | 0.089686311  | 0.498135587  | 0.316118853  | target selection  |
| ENSDART00000125158 | znf574           | 0.029152083 | -0.158249462 | -0.223654122 | 0.188172427  | 0.054732788  | target selection  |
| ENSDART00000092665 | sreb1            | 0.004619636 | -0.417658309 | -0.274360919 | 0.114636817  | 0.022214824  | target selection  |
| ENSDART00000104751 | mxi1             | 0.002350825 | -0.384587031 | -0.210909301 | 0.22179917   | 0.104111801  | target selection  |
| ENSDART00000111014 | myca             | 0.024986086 | -0.198726525 | 0.073855205  | 0.316369866  | 0.312548093  | brain innervation |
| ENSDART00000083296 | ZNF423           | 0.00814358  | -0.278315489 | 0.051691519  | 0.407184973  | 0.489807123  | brain innervation |
| ENSDART00000171642 | dpf1             | 0.005353377 | -0.380689139 | 0.060927985  | 0.320062308  | 0.358114425  | brain innervation |
| ENSDART00000113087 | hmx1             | 0.000694227 | -0.389387565 | 0.021377927  | 0.234018679  | 0.270888749  | brain innervation |
| ENSDART00000162474 | irx1a            | 0.002931603 | -1.132797992 | -0.349993381 | 0.581252213  | 0.55366573   | brain innervation |
| ENSDART00000162850 | irx3a            | 0.000148815 | -0.694816328 | -0.301932125 | 0.187764734  | 0.208405543  | brain innervation |
| ENSDART00000053782 | scrt2            | 0.003310987 | -0.252422437 | -0.133353661 | 0.196438899  | 0.160308382  | brain innervation |
| ENSDART00000166834 | RFX7 (1 of many) | 0.009820514 | -0.017124727 | -0.055450521 | 0.18457609   | 0.267891323  | brain innervation |
| ENSDART00000111303 | rfx7             | 0.00161581  | 0.075232989  | 0.085195342  | 0.459783838  | 0.727409902  | brain innervation |
| ENSDART00000131126 | bcl6a            | 0.005688069 | -0.096649799 | -0.044696983 | 0.295011601  | 0.436349263  | brain innervation |
| ENSDART00000065139 | gfi1ab           | 0.023335678 | -0.252440054 | -0.123023724 | 0.269699656  | 0.68808671   | brain innervation |
| ENSDART00000012862 | isl2a            | 3.29E-05    | -0.663813396 | 0.011664777  | 0.746201858  | 1.074694305  | brain innervation |
| ENSDART00000025031 | pou4f1           | 1.46E-05    | -0.37458842  | -0.169318799 | 0.774588614  | 1.160187758  | brain innervation |
| ENSDART00000016303 | irx2a            | 4.96E-05    | -0.381386746 | 0.064410059  | 0.752093904  | 0.989751717  | brain innervation |
| ENSDART00000130163 | nr2f2            | 0.012656704 | -0.280168769 | -0.057880311 | 0.350863039  | 0.468160546  | brain innervation |
| ENSDART00000122101 | tbx2b            | 0.001190205 | -0.056468629 | 0.017248499  | 0.19422425   | 0.382938949  | brain innervation |
| ENSDART00000150068 | sox6             | 0.001331938 | -0.111707858 | -0.047191704 | 0.355284385  | 0.700337568  | brain innervation |
| ENSDART00000062982 | foxo3b           | 0.005646833 | -0.232285352 | -0.219543276 | -0.013673206 | 0.18814406   | brain innervation |
| ENSDART00000030773 | foxo3a           | 0.000701449 | -0.522674186 | -0.346284342 | -0.025883071 | 0.086783781  | brain innervation |
| ENSDART00000100658 | esrra            | 8.74E-05    | -0.571475474 | -0.395296451 | 0.169003635  | 0.212368184  | brain innervation |
| ENSDART00000108775 | ubp1             | 0.021499635 | -0.192682892 | -0.115240547 | 0.10453418   | 0.097860664  | brain innervation |
| ENSDART00000074833 | rx3              | 0.010379183 | -0.279918529 | -0.301637969 | 0.143576872  | 0.172520697  | brain innervation |
| ENSDART00000006737 | sox5             | 0.038386468 | -0.253791611 | -0.278700286 | 0.184042389  | 0.275951824  | brain innervation |
| ENSDART00000011890 | zbtb22a          | 0.03843558  | -0.42030539  | -0.536466631 | 0.147549186  | 0.05725602   | brain innervation |
| ENSDART00000001795 | sp3a             | 0.0407578   | -0.269877105 | -0.305437708 | -0.047306155 | -0.033496274 | brain innervation |
| ENSDART00000018603 | tbx4             | 0.04873911  | -0.302508569 | -0.188111077 | -0.131947864 | 0.000377602  | brain innervation |
| ENSDART00000003884 | mynn             | 0.033340088 | -0.108806257 | -0.247003557 | 0.197551703  | 0.151198862  | brain innervation |
| ENSDART00000104327 | vsx1             | 0.00488592  | -0.248525466 | -0.619641572 | -0.034766195 | -0.028538746 | brain innervation |
| ENSDART00000165223 | pbx1b            | 0.015188807 | -0.243991197 | -0.377373898 | -0.18693501  | 0.141565589  | brain innervation |
| ENSDART00000167440 | zfhx3            | 0.018342429 | -0.067144102 | -0.226395351 | 0.21751863   | 0.266797189  | brain innervation |
| ENSDART00000167538 | lcor             | 0.031258003 | -0.151917658 | -0.14482463  | 0.130691961  | 0.223379898  | brain innervation |

|                    |         |             |              |              |              |              |                                           |
|--------------------|---------|-------------|--------------|--------------|--------------|--------------|-------------------------------------------|
| ENSDART0000013148  | pou3f1  | 0.00849815  | -0.360437586 | -0.322601739 | -0.060819622 | 0.211329038  | brain innervation                         |
| ENSDART00000109356 | klf7a   | 0.000177237 | -0.7063233   | -0.659659661 | -0.044315321 | 0.157900055  | brain innervation                         |
| ENSDART00000138048 | pbx3b   | 0.007841242 | -0.599655595 | -0.602159282 | -0.228775798 | -0.019503135 | brain innervation                         |
| ENSDART00000136245 | cux1a   | 0.013366886 | -0.163227222 | -0.237382603 | -0.00302824  | 0.164419575  | brain innervation                         |
| ENSDART00000170631 | ebf1a   | 0.016255169 | -0.245696473 | -0.326200552 | -0.132641619 | 0.115308885  | brain innervation                         |
| ENSDART00000064833 | mafaa   | 0.002047801 | -0.957052225 | -1.143383392 | -0.379735148 | 0.067354966  | brain innervation                         |
| ENSDART00000004548 | barhl1b | 0.009605408 | -2.472825095 | -1.41656094  | -0.268019579 | 0.230183047  | brain innervation                         |
| ENSDART00000006380 | tbx3a   | 0.004106215 | -0.244591708 | -0.352646993 | -0.144447405 | 0.06961498   | brain innervation                         |
| ENSDART00000151904 | foxn3   | 0.000466769 | -0.402174688 | -0.533042351 | -0.141780798 | 0.022724604  | brain innervation                         |
| ENSDART00000080808 | six3a   | 0.000687981 | -0.437705937 | -0.430575558 | -0.140593988 | -0.07114268  | brain innervation                         |
| ENSDART00000171594 | mef2aa  | 0.010231208 | -0.649844171 | -0.685014218 | -0.301258241 | -0.003741614 | brain innervation                         |
| ENSDART00000136729 | ebf1b   | 0.021027344 | -2.79991744  | -3.068779235 | -0.720206417 | 0.313112936  | brain innervation                         |
| ENSDART00000162945 | sox5    | 0.023596757 | -0.177385379 | -0.174200373 | -0.003535976 | 0.152149827  | brain innervation                         |
| ENSDART00000132589 | mef2d   | 0.028030725 | -0.20910625  | -0.209165039 | -0.020444617 | 0.107291243  | brain innervation                         |
| ENSDART00000165698 | pbx1a   | 0.000272902 | -0.205212048 | -0.330154536 | 0.047550564  | 0.321002436  | brain innervation                         |
| ENSDART00000144894 | bcl11ba | 3.52E-05    | -0.656989822 | -0.679320488 | 0.181338486  | 0.623847694  | brain innervation                         |
| ENSDART00000006612 | tbr1b   | 2.95E-05    | -1.166029945 | -1.008207372 | 0.617040877  | 1.169470893  | brain innervation                         |
| ENSDART00000154646 | bcl11ba | 0.001677265 | -0.533670184 | -0.516802708 | 0.152594691  | 0.570166001  | brain innervation                         |
| ENSDART00000160675 | dpf1    | 0.00210146  | -0.344267461 | -0.462495684 | 0.239034332  | 0.46811192   | brain innervation                         |
| ENSDART00000144186 | pou6f2  | 7.05E-05    | -0.474463335 | -0.465571046 | 0.092941552  | 0.436081081  | brain innervation                         |
| ENSDART00000124112 | pou4f2  | 2.95E-05    | -1.368026557 | -1.308261738 | 0.344262724  | 0.908586045  | brain innervation                         |
| ENSDART00000051693 | irx4a   | 0.000591404 | -1.596922819 | -2.014349322 | 0.164610846  | 0.924604512  | brain innervation                         |
| ENSDART00000149175 | pou4f3  | 3.34E-05    | -1.520089487 | -1.231379123 | 0.357488642  | 0.743891028  | brain innervation                         |
| ENSDART00000055936 | isl2b   | 4.92E-05    | -1.527471977 | -1.312125436 | 0.470803449  | 0.853726063  | brain innervation                         |
| ENSDART00000165609 | barhl2  | 0.000401616 | -0.31272019  | -0.374018735 | 0.126371762  | 0.224852149  | brain innervation                         |
| ENSDART00000010896 | isl1    | 0.002539705 | -0.281634356 | -0.275090348 | 0.147086866  | 0.205392134  | brain innervation                         |
| ENSDART00000100508 | ebf1b   | 0.010170292 | -0.252122108 | -0.356560297 | -0.077233007 | 0.218128715  | brain innervation                         |
| ENSDART00000081170 | cux1a   | 0.000900234 | -0.092953946 | -0.2283391   | 0.138990685  | 0.296890549  | brain innervation                         |
| ENSDART00000162485 | pax6a   | 0.013416969 | -0.383059238 | -0.321515523 | -0.107334897 | 0.077147684  | brain innervation                         |
| ENSDART00000165774 | pax6a   | 0.007156543 | -0.382942423 | -0.218376905 | 0.094924321  | 0.282463268  | brain innervation                         |
| ENSDART00000142087 | foxp2   | 0.000565675 | -0.522019738 | -0.4194261   | 0.065656049  | 0.27497631   | brain innervation                         |
| ENSDART00000048994 | pbx3b   | 0.000910662 | -0.545498331 | -0.428509616 | 0.129533791  | 0.149586816  | brain innervation                         |
| ENSDART00000077157 | six3b   | 0.008086296 | -0.273810969 | -0.17356253  | 0.033591817  | 0.098241195  | brain innervation                         |
| ENSDART00000040672 | mecp2   | 0.047533941 | -0.242382035 | -0.413395534 | -0.149398689 | -0.148226048 | downregulated during regeneration - early |
| ENSDART00000037879 | crx     | 0.018920791 | -0.254014844 | -0.310425293 | -0.22793154  | -0.020194538 | downregulated during regeneration - early |
| ENSDART00000122429 | klf15   | 0.006222767 | -0.341190152 | -0.616050077 | -0.578895446 | -0.337948098 | downregulated during regeneration - early |
| ENSDART00000166313 | thrb    | 0.0223553   | -0.193382381 | -0.415286369 | -0.400030228 | -0.136855946 | downregulated during regeneration - early |
| ENSDART00000089748 | rorb    | 0.030623213 | -0.330969943 | -0.539847879 | -0.425468683 | -0.138099942 | downregulated during regeneration - early |

|                    |                  |             |              |              |              |              |                                           |
|--------------------|------------------|-------------|--------------|--------------|--------------|--------------|-------------------------------------------|
| ENSDART0000000876  | nr4a1            | 0.000894056 | -2.262372442 | -2.399082592 | -2.145415905 | -1.543723254 | downregulated during regeneration - early |
| ENSDART00000153187 | thrab            | 0.001402519 | -0.362356661 | -0.551240408 | -0.403932333 | -0.192068079 | downregulated during regeneration - early |
| ENSDART00000054736 | bhlhe23          | 0.004928313 | -0.369485488 | -0.514619457 | -0.390416516 | -0.190127988 | downregulated during regeneration - early |
| ENSDART00000167052 | etv1             | 0.01072353  | -0.327639473 | -0.469002174 | -0.32895701  | -0.22464313  | downregulated during regeneration - early |
| ENSDART00000026017 | bhlhe40          | 0.046057741 | -0.186426622 | -0.329757373 | -0.286559283 | -0.071751826 | downregulated during regeneration - early |
| ENSDART00000131134 | si:ch211-206a7.2 | 0.008848885 | -0.226522125 | -0.472315068 | -0.371394997 | -0.101330709 | downregulated during regeneration - early |
| ENSDART00000024832 | stat5a           | 0.004077075 | -0.212236095 | -0.408877789 | -0.375060924 | -0.185569558 | downregulated during regeneration - early |
| ENSDART00000091707 | dbpa             | 0.017575469 | -0.158262702 | -0.327851995 | -0.357551076 | -0.129469939 | downregulated during regeneration - early |
| ENSDART00000126966 | esrrga           | 0.017679749 | -0.248566713 | -0.265310961 | -0.321308408 | -0.070523791 | downregulated during regeneration - early |
| ENSDART00000127353 | nr1d2b           | 0.027085654 | -0.29103008  | -0.243688493 | -0.346507775 | -0.100908835 | downregulated during regeneration - early |
| ENSDART00000047541 | bach1b           | 0.039802589 | -0.343772395 | -0.510091534 | -0.468889885 | -0.333515696 | downregulated during regeneration - early |
| ENSDART00000007630 | nhlh2            | 0.010056242 | -0.28794611  | -0.324673306 | -0.385652145 | -0.261092419 | downregulated during regeneration - early |
| ENSDART00000129498 | mef2d            | 0.03679078  | -0.188451231 | -0.381445449 | -0.263610552 | -0.197973462 | downregulated during regeneration - early |
| ENSDART00000164349 | e2f4             | 0.042377891 | -0.246759183 | -0.226331986 | -0.10688884  | -0.101679787 | downregulated during regeneration - early |
| ENSDART00000157890 | tcf7l1b          | 0.035686017 | -4.555123239 | -4.673271453 | -1.829433189 | -0.732249154 | downregulated during regeneration - early |
| ENSDART00000165757 | pax6b            | 0.019981901 | -1.030621281 | -0.736504391 | -0.510180699 | -0.112500923 | downregulated during regeneration - early |
| ENSDART00000169609 | tefb             | 0.032368681 | -0.156114581 | -0.555141888 | -0.301378906 | -0.24132076  | downregulated during regeneration - early |
| ENSDART00000103640 | hey1             | 0.023203992 | -0.385659584 | -0.747117397 | -0.392306381 | -0.416692063 | downregulated during regeneration - early |
| ENSDART00000013003 | tfap2b           | 0.008192536 | -0.299930992 | -0.578681033 | -0.25971747  | -0.279510711 | downregulated during regeneration - early |
| ENSDART00000082346 | tfap2a           | 0.038054224 | -0.238141907 | -0.307957291 | -0.242159487 | -0.230339237 | downregulated during regeneration - early |
| ENSDART00000147658 | bhlhe22          | 0.01205445  | -0.302235414 | -0.31899187  | -0.305987775 | -0.102192149 | downregulated during regeneration - early |
| ENSDART00000057644 | lhx4             | 0.048389146 | -0.267668007 | -0.268543602 | -0.190125613 | -0.119751289 | downregulated during regeneration - early |
| ENSDART00000009938 | tcf12            | 0.025246927 | -0.385864267 | -0.351608927 | -0.283149928 | -0.323464659 | downregulated during regeneration - early |
| ENSDART00000065361 | etv5b            | 0.019698661 | -0.645686026 | -0.347502384 | -0.293939032 | -0.317696675 | downregulated during regeneration - early |
| ENSDART00000055709 | her2             | 0.030146589 | -0.984524994 | -0.833253569 | -0.717745512 | -1.233522642 | downregulated during regeneration - early |
| ENSDART00000055706 | her15.1          | 0.021144178 | -1.483608056 | -1.154441068 | -0.698110478 | -1.436427969 | downregulated during regeneration - early |
| ENSDART00000133487 | fosb             | 0.034512759 | -0.882572207 | -1.273781011 | -0.772506712 | -0.914864674 | downregulated during regeneration - early |
| ENSDART00000151127 | thraa            | 0.039890399 | -0.798583389 | -0.802364861 | -0.351487338 | -0.589241182 | downregulated during regeneration - early |
| ENSDART00000153167 | hlfb             | 0.010966965 | -0.470839666 | -0.326611575 | -0.235752692 | -0.264047019 | downregulated during regeneration - early |
| ENSDART00000086051 | mecom            | 0.04049764  | -0.550304416 | -0.298852875 | -0.293768303 | -1.334615988 | downregulated during regeneration - early |
| ENSDART00000023613 | her6             | 0.030622517 | -0.335042933 | -0.234567638 | -0.250120727 | -0.59712361  | downregulated during regeneration - early |
| ENSDART00000125174 | nr1i2            | 0.028902271 | -0.056601149 | -0.085618729 | -0.264588441 | -0.326132843 | downregulated during regeneration - late  |
| ENSDART00000089015 | zbtb7a           | 0.00191624  | -0.478666207 | -0.203919761 | -0.738823143 | -0.713706626 | downregulated during regeneration - late  |
| ENSDART00000044860 | maff             | 0.002310171 | 0.057535561  | 0.039208376  | -0.366680053 | -0.441007369 | downregulated during regeneration - late  |
| ENSDART00000167844 | mafk             | 0.014095383 | -0.00863672  | 0.25450476   | -0.276014619 | -0.283559487 | downregulated during regeneration - late  |
| ENSDART00000057124 | tefa             | 0.007560757 | -0.17959692  | 0.074135039  | -0.330628318 | -0.262330789 | downregulated during regeneration - late  |
| ENSDART00000057125 | tefa             | 0.002939873 | -0.190705988 | 0.094171259  | -0.306461854 | -0.301060608 | downregulated during regeneration - late  |
| ENSDART00000163250 | mef2cb           | 0.003671994 | 0.361224616  | -0.300957895 | -0.57227951  | -0.080214844 | downregulated during regeneration - late  |

|                    |         |             |              |              |              |              |                                          |
|--------------------|---------|-------------|--------------|--------------|--------------|--------------|------------------------------------------|
| ENSDART00000131731 | mef2ca  | 0.006008543 | 0.234535922  | -0.250149626 | -0.381098175 | -0.047609857 | downregulated during regeneration - late |
| ENSDART00000161387 | tcf12   | 0.008531138 | 0.370378706  | 0.009395421  | -0.374363269 | -0.152945712 | downregulated during regeneration - late |
| ENSDART00000127099 | nr2e3   | 0.030676359 | 0.281603482  | 0.002911001  | -0.560613973 | -0.033774044 | downregulated during regeneration - late |
| ENSDART00000066655 | mybl1   | 0.005666275 | -0.255810306 | -0.487313899 | -0.72749049  | -0.668391364 | downregulated during regeneration - late |
| ENSDART00000172251 | creb3l1 | 0.029283678 | -0.33540662  | 0.193573394  | -4.078076569 | -0.842213331 | downregulated during regeneration - late |
| ENSDART00000170575 | nfat5b  | 0.018611393 | -0.001493923 | -0.392122738 | -0.566909919 | -0.288747412 | downregulated during regeneration - late |
| ENSDART00000148106 | mef2aa  | 0.026582721 | -0.081330082 | -0.55524128  | -0.609035118 | -0.185252531 | downregulated during regeneration - late |
| ENSDART00000075070 | hsf2    | 0.014034602 | -0.066635095 | -0.276496416 | -0.474097609 | -0.186498896 | downregulated during regeneration - late |
| ENSDART00000148353 | usf2    | 0.006964046 | -0.107987138 | -0.265954127 | -0.405201274 | -0.200197809 | downregulated during regeneration - late |
| ENSDART00000061106 | bhlhe41 | 0.000553147 | 0.043056173  | -0.423617996 | -0.754959095 | -0.246095493 | downregulated during regeneration - late |
| ENSDART00000139102 | dbpb    | 0.001993937 | 0.113164671  | -0.364559303 | -0.423196921 | -0.137052116 | downregulated during regeneration - late |
| ENSDART00000077839 | atf7b   | 0.014656899 | -0.232485852 | -0.196508033 | -0.391624214 | -0.206346003 | downregulated during regeneration - late |
| ENSDART00000045374 | smad3a  | 0.043076195 | -0.063329624 | -0.157712113 | -0.303211349 | -0.108940629 | downregulated during regeneration - late |
| ENSDART00000093331 | rreb1a  | 0.018126285 | -0.024901133 | -0.155149005 | -0.517234878 | -0.050769944 | downregulated during regeneration - late |
| ENSDART00000148537 | rora    | 0.01612441  | -0.160828233 | -0.221872095 | -0.45696721  | -0.083100906 | downregulated during regeneration - late |
| ENSDART00000123970 | mntb    | 0.011725523 | -0.115861458 | -0.101461538 | -0.360694649 | -0.01567692  | downregulated during regeneration - late |
| ENSDART00000127157 | hlfa    | 0.048701514 | -0.089881453 | -0.212609643 | -0.346930267 | -0.147102401 | downregulated during regeneration - late |
| ENSDART00000126282 | nr1d1   | 0.008088213 | -0.1014969   | -0.191656676 | -0.494430716 | -0.13667305  | downregulated during regeneration - late |



Table S7. Transcription factors that are differentially expressed during regeneration.

| ENSEMBL ID         | zebrafish gene symbol | cluster order | HGNC symbol | motif status | DNA binding domain | #motifs |
|--------------------|-----------------------|---------------|-------------|--------------|--------------------|---------|
| ENSDART00000128815 | stra13                | 1             | CENPX       | n            | Unknown            | 0       |
| ENSDART00000098285 | atf5a                 | 1             | ATF5        | n            | bZIP               | 0       |
| ENSDART00000062576 | thyn1                 | 1             | THYN1       | n            | Unknown            | 0       |
| ENSDART00000013409 | prmt3                 | 1             | PRMT3       | n            | C2H2 ZF            | 0       |
| ENSDART00000058277 | znf800b               | 1             | ZNF800      | n            | C2H2 ZF            | 0       |
| ENSDART00000103982 | nfe2l1a               | 1             | NFE2L1      | n            | bZIP               | 0       |
| ENSDART00000081468 | ccdc79                | 1             | TERB1       | n            | bZIP               | 0       |
| ENSDART00000155066 | atf5b                 | 1             | ATF5        | n            | bZIP               | 0       |
| ENSDART00000114288 | foxp4                 | 1             | FOXP4       | n            | Forkhead           | 0       |
| ENSDART00000086053 | PRDM16                | 1             | PRDM16      | n            | C2H2 ZF            | 0       |
| ENSDART00000140760 | e2f7                  | 1             | E2F7        | y            | E2F                | 1       |
| ENSDART00000056005 | ascl1a                | 1             | ASCL1       | y            | bHLH               | 1       |
| ENSDART00000128488 | e2f8                  | 1             | E2F8        | y            | E2F                | 1       |
| ENSDART00000132119 | max                   | 1             | MAX         | y            | bHLH               | 4       |
| ENSDART00000163794 | wt1b                  | 1             | WT1         | y            | C2H2 ZF            | 8       |
| ENSDART00000033494 | klf6a                 | 1             | KLF6        | y            | C2H2 ZF            | 39      |
| ENSDART00000147849 | klf6a                 | 1             | KLF6        | y            | C2H2 ZF            | 39      |
| ENSDART00000076161 | hoxb5b                | 1             | HOXB5       | y            | Homeodomain        | 1       |
| ENSDART00000122628 | junba                 | 1             | JUNB        | y            | bZIP               | 10      |
| ENSDART00000146767 | fosl1a                | 1             | FOSL1       | y            | bZIP               | 6       |
| ENSDART00000161610 | tcf3b                 | 1             | TCF3        | y            | bHLH               | 3       |
| ENSDART00000051549 | tp53                  | 1             | TP53        | y            | p53                | 3       |
| ENSDART00000164711 | NFATC2                | 1             | NFATC2      | y            | Rel                | 1       |
| ENSDART00000063912 | jun                   | 1             | JUN         | y            | bZIP               | 12      |
| ENSDART00000022060 | atf3                  | 1             | ATF3        | y            | bZIP               | 1       |
| ENSDART00000110040 | sox11a                | 1             | SOX11       | y            | HMG/Sox            | 1       |
| ENSDART00000104519 | stat3                 | 1             | STAT3       | y            | STAT               | 2       |
| ENSDART00000142584 | alx1                  | 1             | ALX1        | y            | Homeodomain        | 1       |
| ENSDART00000135381 | six4a                 | 1             | SIX4        | y            | Homeodomain        | 24      |
| ENSDART00000012791 | sp8a                  | 1             | SP8         | y            | C2H2 ZF            | 1       |
| ENSDART00000160644 | rela                  | 1             | RELA        | y            | Rel                | 1       |
| ENSDART00000010248 | mitfb                 | 1             | MITF        | y            | bHLH               | 2       |
| ENSDART00000157487 | tfec                  | 1             | TFEC        | y            | bHLH               | 1       |
| ENSDART00000164766 | tfec                  | 1             | TFEC        | y            | bHLH               | 1       |
| ENSDART00000158466 | creb3l2               | 1             | CREB3L2     | y            | bZIP               | 1       |
| ENSDART00000152378 | tgif1                 | 1             | TGIF1       | y            | Homeodomain        | 1       |
| ENSDART00000062702 | cebpb                 | 1             | CEBPB       | y            | bZIP               | 2       |
| ENSDART00000056457 | mitfa                 | 1             | MITF        | y            | bHLH               | 2       |
| ENSDART00000080854 | stat3                 | 1             | STAT3       | y            | STAT               | 2       |
| ENSDART00000093279 | spl1b                 | 1             | SPIB        | y            | Ets                | 1       |
| ENSDART00000036729 | spl1b                 | 1             | SPIB        | y            | Ets                | 1       |
| ENSDART00000008373 | fosl1a                | 1             | FOSL1       | y            | bZIP               | 6       |
| ENSDART00000093199 | tead3b                | 1             | TEAD3       | y            | TEA                | 1       |
| ENSDART00000017185 | tbx20                 | 1             | TBX20       | y            | T-box              | 1       |
| ENSDART00000052366 | cebpa                 | 1             | CEBPA       | y            | bZIP               | 4       |
| ENSDART00000005263 | usf1                  | 1             | USF1        | y            | bHLH               | 2       |
| ENSDART00000062854 | nfe2l2a               | 1             | NFE2L2      | y            | bZIP               | 2       |
| ENSDART00000016135 | nfe2l3                | 2             | NFE2L3      | n            | bZIP               | 0       |
| ENSDART00000123263 | phf20a                | 2             | PHF20       | n            | AT hook            | 0       |
| ENSDART00000146180 | csrp2                 | 2             | CSRNP2      | n            | Unknown            | 0       |
| ENSDART00000013961 | mycla                 | 2             | MYCL        | n            | bHLH               | 0       |
| ENSDART00000018150 | neurod6b              | 2             | NEUROD6     | n            | bHLH               | 0       |
| ENSDART00000165656 | mxd3                  | 2             | MXD3        | n            | bHLH               | 0       |
| ENSDART00000114473 | trafd1                | 2             | TRAFD1      | n            | C2H2 ZF            | 0       |
| ENSDART00000158598 | si:ch211-232b12.5     | 2             | ZHX3        | n            | #N/A               | 0       |
| ENSDART00000151044 | baz2ba                | 2             | BAZ2B       | n            | MBD                | 0       |
| ENSDART00000141941 | zfp202a               | 2             | ZFP202      | n            | C2H2 ZF            | 0       |
| ENSDART00000109552 | baz2ba                | 2             | BAZ2B       | n            | MBD                | 0       |
| ENSDART00000029843 | vezf1a                | 2             | VEZF1       | n            | C2H2 ZF            | 0       |
| ENSDART00000041877 | csrp1a                | 2             | CSRNP1      | n            | Unknown            | 0       |
| ENSDART00000170865 | nme2b.1               | 2             | NME2        | n            | Unknown            | 0       |
| ENSDART00000018743 | phf20a                | 2             | PHF20       | n            | AT hook            | 0       |
| ENSDART00000099849 | arntl2                | 2             | ARNTL2      | n            | bHLH               | 0       |
| ENSDART00000149074 | sall1b                | 2             | SALL1       | n            | C2H2 ZF            | 0       |
| ENSDART00000153227 | nfe2l1b               | 2             | NFE2L1      | n            | bZIP               | 0       |
| ENSDART00000024872 | creb3l3l              | 2             | CREB3L3     | n            | bZIP               | 0       |
| ENSDART00000123559 | znf521                | 2             | ZNF521      | n            | C2H2 ZF            | 0       |
| ENSDART00000077484 | zhx2a                 | 2             | ZHX2        | n            | Homeodomain        | 0       |
| ENSDART00000138081 | bcl6ab                | 2             | BCL6        | y            | C2H2 ZF            | 1       |
| ENSDART00000104317 | klf7b                 | 2             | KLF7        | y            | C2H2 ZF            | 38      |
| ENSDART00000124040 | insm1a                | 2             | INSM1       | y            | C2H2 ZF            | 1       |
| ENSDART00000048110 | six4b                 | 2             | SIX4        | y            | Homeodomain        | 24      |
| ENSDART00000159652 | sox4b                 | 2             | SOX4        | y            | HMG/Sox            | 1       |
| ENSDART00000092690 | sreb2                 | 2             | SREBF2      | y            | bHLH               | 1       |
| ENSDART00000033755 | homezb                | 2             | HOMEZ       | y            | Homeodomain        | 1       |
| ENSDART00000018945 | meis3                 | 2             | MEIS3       | y            | Homeodomain        | 1       |
| ENSDART00000075331 | insm1b                | 2             | INSM1       | y            | C2H2 ZF            | 1       |
| ENSDART00000150128 | foxp1b                | 2             | FOXP1       | y            | Forkhead           | 2       |
| ENSDART00000128174 | foxp1b                | 2             | FOXP1       | y            | Forkhead           | 2       |
| ENSDART00000023959 | arntl1a               | 2             | ARNTL       | y            | bHLH               | 1       |
| ENSDART00000026992 | sox4a                 | 2             | SOX4        | y            | HMG/Sox            | 1       |
| ENSDART00000083628 | ddit3                 | 2             | DDIT3       | y            | bZIP               | 1       |
| ENSDART00000110512 | ybx1                  | 2             | YBX1        | y            | CSD                | 4       |
| ENSDART00000141068 | sox11b                | 2             | SOX11       | y            | HMG/Sox            | 1       |
| ENSDART00000138821 | nfil3                 | 2             | NFIL3       | y            | bZIP               | 1       |
| ENSDART00000082434 | tgif1                 | 2             | TGIF1       | y            | Homeodomain        | 1       |
| ENSDART00000139763 | stat5a                | 2             | STAT5A      | y            | STAT               | 1       |
| ENSDART00000055609 | atf4b                 | 2             | ATF4        | y            | bZIP               | 1       |
| ENSDART00000172990 | znf628                | 3             | ZNF628      | n            | C2H2 ZF            | 0       |
| ENSDART00000112756 | ZNF608                | 3             | ZNF608      | n            | C2H2 ZF            | 0       |

| DE transcript cluster | DETF cluster order | total TFs | TFs with motifs |
|-----------------------|--------------------|-----------|-----------------|
| 1clust5               | 1                  | 40        | 31              |
| 2clust4               | 1,2                | 76        | 48              |
| 3clust2               | 3                  | 41        | 18              |
| 4clust6               | 4                  | 75        | 51              |
| 5clust7               | 5                  | 62        | 34              |
| 6clust3               | 6                  | 41        | 23              |
| 7clust1               | 6                  | 41        | 23              |

|                     |                    |   |          |   |                      |    |
|---------------------|--------------------|---|----------|---|----------------------|----|
| ENSDART00000090226  | znf319b            | 3 | ZNF319   | n | C2H2 ZF              | 0  |
| ENSDART00000098859  | neurod6a           | 3 | NEUROD6  | n | bHLH                 | 0  |
| ENSDART00000031167  | tfap2d             | 3 | TFAP2D   | n | AP-2                 | 0  |
| ENSDART00000166502  | satb2              | 3 | SATB2    | n | CUT; Homeodomain     | 0  |
| ENSDART00000167324  | ebf3a              | 3 | EBF3     | n | EBF1                 | 0  |
| ENSDART00000157855  | ebf3a              | 3 | EBF3     | n | EBF1                 | 0  |
| ENSDART00000158634  | ebf3a              | 3 | EBF3     | n | EBF1                 | 0  |
| ENSDART00000128504  | si:key-106g10.7    | 3 | C11orf95 | n | #N/A                 | 0  |
| ENSDART00000109493  | tszh2              | 3 | TSHZ2    | n | C2H2 ZF              | 0  |
| ENSDART00000058685  | zfp2m2a            | 3 | ZFPM2    | n | C2H2 ZF              | 0  |
| ENSDART00000110069  | CABZ01075131.1     | 3 | CSRN3    | n | Unknown              | 0  |
| ENSDART00000166565  | tszh3b             | 3 | TSHZ3    | n | C2H2 ZF              | 0  |
| ENSDART00000123147  | zbtb8a             | 3 | ZBTB8A   | n | C2H2 ZF              | 0  |
| ENSDART000000084819 | arhgap35b          | 3 | ARHGAP35 | n | Unknown              | 0  |
| ENSDART00000104712  | hmg20a             | 3 | HMG20A   | n | HMG/Sox              | 0  |
| ENSDART00000135647  | si:ch211-113e8.10  | 3 | ZFP91    | n | C2H2 ZF              | 0  |
| ENSDART00000165877  | purg               | 3 | PURG     | n | Unknown              | 0  |
| ENSDART00000089076  | dot1l              | 3 | DOT1L    | n | AT hook              | 0  |
| ENSDART00000140284  | zbtb16a            | 3 | ZBTB16   | n | C2H2 ZF              | 0  |
| ENSDART00000165955  | zhx3               | 3 | ZHX3     | n | #N/A                 | 0  |
| ENSDART00000037516  | znf827             | 3 | ZNF827   | n | C2H2 ZF              | 0  |
| ENSDART00000060193  | thap3              | 3 | THAP3    | n | THAP finger          | 0  |
| ENSDART00000154730  | tsc22d1            | 3 | TSC22D1  | n | Unknown              | 0  |
| ENSDART00000152636  | clocka             | 3 | CLOCK    | y | bHLH                 | 1  |
| ENSDART00000166976  | esrrb              | 3 | ESRRB    | y | Nuclear receptor     | 3  |
| ENSDART00000066317  | foxn2b             | 3 | FOXN2    | y | Forkhead             | 11 |
| ENSDART00000104523  | arntl1b            | 3 | ARNTL    | y | bHLH                 | 1  |
| ENSDART00000133959  | clockb             | 3 | CLOCK    | y | bHLH                 | 1  |
| ENSDART00000047724  | zeb1b              | 3 | ZEB1     | y | C2H2 ZF; Homeodomain | 3  |
| ENSDART00000085728  | klf8               | 3 | KLF8     | y | C2H2 ZF              | 38 |
| ENSDART00000013605  | zbtb20             | 3 | ZBTB20   | y | C2H2 ZF              | 2  |
| ENSDART00000087450  | klf13              | 3 | KLF13    | y | C2H2 ZF              | 1  |
| ENSDART00000000280  | stat1b             | 3 | STAT1    | y | STAT                 | 4  |
| ENSDART00000151575  | thraa              | 3 | THRA     | y | Nuclear receptor     | 15 |
| ENSDART00000154418  | relb               | 3 | RELB     | y | Rel                  | 1  |
| ENSDART00000123197  | relb               | 3 | RELB     | y | Rel                  | 1  |
| ENSDART00000152489  | irf3               | 3 | IRF3     | y | IRF                  | 1  |
| ENSDART00000141792  | stat1b             | 3 | STAT1    | y | STAT                 | 4  |
| ENSDART00000103622  | irf7               | 3 | IRF7     | y | IRF                  | 1  |
| ENSDART00000148661  | stat2              | 3 | STAT2    | y | STAT                 | 1  |
| ENSDART00000005720  | stat1a             | 3 | STAT1    | y | STAT                 | 4  |
| ENSDART00000156935  | pbx4               | 3 | PBX4     | y | Homeodomain          | 15 |
| ENSDART00000025575  | clocka             | 3 | CLOCK    | y | bHLH                 | 1  |
| ENSDART00000125158  | znf574             | 3 | ZNF574   | y | C2H2 ZF              | 2  |
| ENSDART00000092665  | sreb1              | 3 | SREBF1   | y | bHLH                 | 1  |
| ENSDART00000104751  | mx1                | 3 | MX1      | y | bHLH                 | 1  |
| ENSDART00000101316  | znf618             | 4 | ZNF618   | n | C2H2 ZF              | 0  |
| ENSDART00000112529  | znf319a            | 4 | ZNF319   | n | C2H2 ZF              | 0  |
| ENSDART00000172410  | jazf1a             | 4 | JAZF1    | n | C2H2 ZF              | 0  |
| ENSDART00000089923  | znf652             | 4 | ZNF652   | n | C2H2 ZF              | 0  |
| ENSDART00000101070  | dachd              | 4 | DACH2    | n | Unknown              | 0  |
| ENSDART00000114246  | adnpb              | 4 | ADNP2    | n | Homeodomain          | 0  |
| ENSDART00000023038  | dacha              | 4 | DACH2    | n | Unknown              | 0  |
| ENSDART00000045628  | irx6a              | 4 | IRX6     | n | Homeodomain          | 0  |
| ENSDART00000145072  | neurod4            | 4 | NEUROD4  | n | bHLH                 | 0  |
| ENSDART00000109347  | nacc2              | 4 | NACC2    | n | Unknown              | 0  |
| ENSDART00000008906  | znf503             | 4 | ZNF503   | n | C2H2 ZF              | 0  |
| ENSDART00000155866  | zbtb16b            | 4 | ZBTB16   | n | C2H2 ZF              | 0  |
| ENSDART00000164488  | mbnl2              | 4 | MBNL2    | n | CCCH ZF              | 0  |
| ENSDART00000160784  | satb1b             | 4 | SATB1    | n | CUT; Homeodomain     | 0  |
| ENSDART00000101631  | satb1b             | 4 | SATB1    | n | CUT; Homeodomain     | 0  |
| ENSDART00000137355  | tet3               | 4 | TET3     | n | CxxC                 | 0  |
| ENSDART00000007806  | zbtb16a            | 4 | ZBTB16   | n | C2H2 ZF              | 0  |
| ENSDART00000046663  | camta1b            | 4 | CAMTA1   | n | CG-1                 | 0  |
| ENSDART00000104790  | znf292b            | 4 | ZNF292   | n | C2H2 ZF              | 0  |
| ENSDART00000084035  | znf532             | 4 | ZNF532   | n | C2H2 ZF              | 0  |
| ENSDART00000134064  | mx1d               | 4 | MXD1     | n | bHLH                 | 0  |
| ENSDART00000136759  | prdm13             | 4 | PRDM13   | n | C2H2 ZF              | 0  |
| ENSDART00000156464  | prr12b             | 4 | PRR12    | n | AT hook              | 0  |
| ENSDART00000153150  | myt1la             | 4 | MYT1L    | n | C2H2 ZF              | 0  |
| ENSDART00000171091  | zeb2b              | 4 | ZEB2     | n | C2H2 ZF; Homeodomain | 0  |
| ENSDART00000131714  | mbnl2              | 4 | MBNL2    | n | CCCH ZF              | 0  |
| ENSDART00000124534  | mbnl2              | 4 | MBNL2    | n | CCCH ZF              | 0  |
| ENSDART00000164643  | ZNF609 (1 of many) | 4 | ZNF609   | n | C2H2 ZF              | 0  |
| ENSDART00000155666  | znf576.1           | 4 | ZNF576   | n | C2H2 ZF              | 0  |
| ENSDART00000111014  | myca               | 4 | MYC      | y | bHLH                 | 4  |
| ENSDART00000083296  | ZNF423             | 4 | ZNF423   | y | C2H2 ZF              | 1  |
| ENSDART00000171642  | dpf1               | 4 | DPF1     | y | C2H2 ZF              | 2  |
| ENSDART00000113087  | hmx1               | 4 | HMX1     | y | Homeodomain          | 1  |
| ENSDART00000162474  | irx1a              | 4 | IRX1     | y | Homeodomain          | 17 |
| ENSDART00000162850  | irx3a              | 4 | IRX3     | y | Homeodomain          | 17 |
| ENSDART00000053782  | scrt2              | 4 | SCRT2    | y | C2H2 ZF              | 1  |
| ENSDART00000166834  | RFX7 (1 of many)   | 4 | RFX7     | y | RFX                  | 14 |
| ENSDART00000111303  | rfx7               | 4 | RFX7     | y | RFX                  | 14 |
| ENSDART00000131126  | bcl6a              | 4 | BCL6     | y | C2H2 ZF              | 1  |
| ENSDART00000065139  | gfi1ab             | 4 | GFI1     | y | C2H2 ZF              | 1  |
| ENSDART00000012862  | isl2a              | 4 | ISL2     | y | Homeodomain          | 1  |
| ENSDART00000025031  | pou4f1             | 4 | POU4F1   | y | Homeodomain; POU     | 1  |
| ENSDART00000016303  | irx2a              | 4 | IRX2     | y | Homeodomain          | 18 |
| ENSDART00000130163  | nr2f2              | 4 | NR2F2    | y | Nuclear receptor     | 1  |
| ENSDART00000122101  | tbx2b              | 4 | TBX2     | y | T-box                | 1  |
| ENSDART00000150068  | sox6               | 4 | SOX6     | y | HMG/Sox              | 1  |
| ENSDART00000062982  | foxo3b             | 4 | FOXO3    | y | Forkhead             | 2  |

|                    |                  |   |         |   |                         |    |
|--------------------|------------------|---|---------|---|-------------------------|----|
| ENSDART0000030773  | foxo3a           | 4 | FOXO3   | y | Forkhead                | 2  |
| ENSDART00000100658 | esrra            | 4 | ESRRA   | y | Nuclear receptor        | 2  |
| ENSDART00000108775 | ubp1             | 4 | UBP1    | y | Grainyhead              | 8  |
| ENSDART00000074833 | rx3              | 4 | RAX     | y | Homeodomain             | 1  |
| ENSDART00000006737 | sox5             | 4 | SOX5    | y | HMG/Sox                 | 1  |
| ENSDART00000011890 | zbtb22a          | 4 | ZBTB22  | y | C2H2 ZF                 | 4  |
| ENSDART00000001795 | sp3a             | 4 | SP3     | y | C2H2 ZF                 | 1  |
| ENSDART00000018603 | tbx4             | 4 | TBX4    | y | T-box                   | 1  |
| ENSDART00000003884 | mynn             | 4 | MYNN    | y | C2H2 ZF                 | 1  |
| ENSDART00000104327 | vsx1             | 4 | VSX1    | y | Homeodomain             | 1  |
| ENSDART00000165223 | pbx1b            | 4 | PBX1    | y | Homeodomain             | 1  |
| ENSDART00000167440 | zfhx3            | 4 | ZFHx3   | y | C2H2 ZF; Homeodomain    | 2  |
| ENSDART00000167538 | lcor             | 4 | LCOR    | y | Pipsqueak               | 4  |
| ENSDART00000013148 | pou3f1           | 4 | POU3F1  | y | Homeodomain; POU        | 1  |
| ENSDART00000109356 | klf7a            | 4 | KLF7    | y | C2H2 ZF                 | 38 |
| ENSDART00000138048 | pbx3b            | 4 | PBX3    | y | Homeodomain             | 1  |
| ENSDART00000136245 | cux1a            | 4 | CUX1    | y | CUT; Homeodomain        | 1  |
| ENSDART00000170631 | ebf1a            | 4 | EBF1    | y | EBF1                    | 3  |
| ENSDART00000064833 | mafaa            | 4 | MAFA    | y | bZIP                    | 25 |
| ENSDART00000004548 | barhl1b          | 4 | BARHL1  | y | Homeodomain             | 1  |
| ENSDART00000006380 | tbx3a            | 4 | TBX3    | y | T-box                   | 14 |
| ENSDART00000151904 | foxn3            | 4 | FOXN3   | y | Forkhead                | 11 |
| ENSDART00000080808 | six3a            | 4 | SIX3    | y | Homeodomain             | 1  |
| ENSDART00000171594 | mef2aa           | 4 | MEF2A   | y | MADS box                | 3  |
| ENSDART00000136729 | ebf1b            | 4 | EBF1    | y | EBF1                    | 3  |
| ENSDART00000162945 | sox5             | 4 | SOX5    | y | HMG/Sox                 | 1  |
| ENSDART00000132589 | mef2d            | 4 | MEF2D   | y | MADS box                | 1  |
| ENSDART00000165698 | pbx1a            | 4 | PBX1    | y | Homeodomain             | 1  |
| ENSDART00000144894 | bcl11ba          | 4 | BCL11B  | y | C2H2 ZF                 | 3  |
| ENSDART00000006612 | tbr1b            | 4 | TBR1    | y | T-box                   | 1  |
| ENSDART00000154646 | bcl11ba          | 4 | BCL11B  | y | C2H2 ZF                 | 3  |
| ENSDART00000160675 | dpf1             | 4 | DPF1    | y | C2H2 ZF                 | 2  |
| ENSDART00000144186 | pou6f2           | 4 | POU6F2  | y | Homeodomain; POU        | 1  |
| ENSDART00000124112 | pou4f2           | 4 | POU4F2  | y | Homeodomain; POU        | 1  |
| ENSDART00000051693 | irx4a            | 4 | IRX4    | y | Homeodomain             | 17 |
| ENSDART00000149175 | pou4f3           | 4 | POU4F3  | y | Homeodomain; POU        | 1  |
| ENSDART00000055936 | isl2b            | 4 | ISL2    | y | Homeodomain             | 1  |
| ENSDART00000165609 | barhl2           | 4 | BARHL2  | y | Homeodomain             | 1  |
| ENSDART00000010896 | isl1             | 4 | ISL1    | y | Homeodomain             | 10 |
| ENSDART00000100508 | ebf1b            | 4 | EBF1    | y | EBF1                    | 3  |
| ENSDART00000081170 | cux1a            | 4 | CUX1    | y | CUT; Homeodomain        | 1  |
| ENSDART00000162485 | pax6a            | 4 | PAX6    | y | Homeodomain; Paired box | 1  |
| ENSDART00000165774 | pax6a            | 4 | PAX6    | y | Homeodomain; Paired box | 1  |
| ENSDART00000142087 | foxp2            | 4 | FOXP2   | y | Forkhead                | 1  |
| ENSDART00000048994 | pbx3b            | 4 | PBX3    | y | Homeodomain             | 1  |
| ENSDART00000077157 | six3b            | 4 | SIX3    | y | Homeodomain             | 1  |
| ENSDART00000022010 | hivep2b          | 5 | HIVEP2  | n | C2H2 ZF                 | 0  |
| ENSDART00000136488 | zmat4a           | 5 | ZMAT4   | n | C2H2 ZF                 | 0  |
| ENSDART00000151571 | ahdc1            | 5 | AHDC1   | n | AT hook                 | 0  |
| ENSDART00000059446 | znf385b          | 5 | ZNF385B | n | C2H2 ZF                 | 0  |
| ENSDART00000165120 | purab            | 5 | PURA    | n | Unknown                 | 0  |
| ENSDART00000172199 | zmat4a           | 5 | ZMAT4   | n | C2H2 ZF                 | 0  |
| ENSDART00000166540 | kcnip3b          | 5 | KCNIP3  | n | Unknown                 | 0  |
| ENSDART00000111842 | sall1a           | 5 | SALL1   | n | C2H2 ZF                 | 0  |
| ENSDART00000150949 | nfyf             | 5 | NFYC    | n | Unknown                 | 0  |
| ENSDART00000166351 | nkrf             | 5 | NKRF    | n | Unknown                 | 0  |
| ENSDART00000090019 | zeb2b            | 5 | ZEB2    | n | C2H2 ZF; Homeodomain    | 0  |
| ENSDART00000009691 | scml4            | 5 | SCML4   | n | AT hook                 | 0  |
| ENSDART00000170400 | ahdc1            | 5 | AHDC1   | n | AT hook                 | 0  |
| ENSDART00000124751 | kcnip3b          | 5 | KCNIP3  | n | Unknown                 | 0  |
| ENSDART00000003548 | znf385a          | 5 | ZNF385A | n | C2H2 ZF                 | 0  |
| ENSDART00000092357 | sgsm2            | 5 | SGSM2   | n | BED ZF                  | 0  |
| ENSDART00000026865 | l3mbtl1a         | 5 | L3MBTL1 | n | C2H2 ZF                 | 0  |
| ENSDART00000033362 | gatad2b          | 5 | GATAD2B | n | GATA                    | 0  |
| ENSDART00000078529 | kin              | 5 | KIN     | n | C2H2 ZF                 | 0  |
| ENSDART00000162857 | nr4a3            | 5 | NR4A3   | n | Nuclear receptor        | 0  |
| ENSDART00000110544 | znf219           | 5 | ZNF219  | n | C2H2 ZF                 | 0  |
| ENSDART00000156351 | zfat             | 5 | ZFAT    | n | C2H2 ZF                 | 0  |
| ENSDART00000166135 | zbtb47b          | 5 | ZBTB47  | n | C2H2 ZF                 | 0  |
| ENSDART00000048775 | mbd3b            | 5 | MBD3    | n | MBD                     | 0  |
| ENSDART00000157659 | camta1b          | 5 | CAMTA1  | n | CG-1                    | 0  |
| ENSDART00000142223 | hivep3b          | 5 | HIVEP3  | n | C2H2 ZF                 | 0  |
| ENSDART00000055890 | znf385c          | 5 | ZNF385C | n | C2H2 ZF                 | 0  |
| ENSDART00000135443 | kdm5ba           | 5 | KDM5B   | n | ARID/BRIGHT             | 0  |
| ENSDART00000162387 | zbtb38           | 5 | ZBTB38  | n | C2H2 ZF                 | 0  |
| ENSDART00000172310 | zbtb4            | 5 | ZBTB4   | n | C2H2 ZF                 | 0  |
| ENSDART00000040672 | mecp2            | 5 | MECP2   | y | MBD; AT hook            | 2  |
| ENSDART00000037879 | crx              | 5 | CRX     | y | Homeodomain             | 1  |
| ENSDART00000122429 | klf15            | 5 | KLF15   | y | C2H2 ZF                 | 6  |
| ENSDART00000166313 | thrb             | 5 | THRB    | y | Nuclear receptor        | 17 |
| ENSDART00000089748 | rorb             | 5 | RORB    | y | Nuclear receptor        | 1  |
| ENSDART00000000876 | nr4a1            | 5 | NR4A1   | y | Nuclear receptor        | 1  |
| ENSDART00000153187 | thrab            | 5 | THRA    | y | Nuclear receptor        | 15 |
| ENSDART00000054736 | bhlhe23          | 5 | BHLHE23 | y | bHLH                    | 1  |
| ENSDART00000167052 | etv1             | 5 | ETV1    | y | Ets                     | 1  |
| ENSDART00000026017 | bhlhe40          | 5 | BHLHE40 | y | bHLH                    | 2  |
| ENSDART00000131134 | si:ch211-206a7.2 | 5 | FOXO6   | y | Forkhead                | 1  |
| ENSDART00000024832 | stat5a           | 5 | STAT5A  | y | STAT                    | 1  |
| ENSDART00000091707 | dbpa             | 5 | DBP     | y | bZIP                    | 1  |
| ENSDART00000126966 | esrrga           | 5 | ESRRG   | y | Nuclear receptor        | 1  |
| ENSDART00000127353 | nr1d2b           | 5 | NR1D2   | y | Nuclear receptor        | 7  |
| ENSDART00000047541 | bach1b           | 5 | BACH1   | y | bZIP                    | 1  |
| ENSDART00000007630 | nhlh2            | 5 | NHLH2   | y | bHLH                    | 21 |

|                     |         |   |         |   |                         |    |
|---------------------|---------|---|---------|---|-------------------------|----|
| ENSDART00000129498  | mef2d   | 5 | MEF2D   | y | MADS box                | 1  |
| ENSDART00000164349  | e2f4    | 5 | E2F4    | y | E2F                     | 1  |
| ENSDART00000157890  | tcf7l1b | 5 | TCF7L1  | y | HMG/Sox                 | 1  |
| ENSDART00000165757  | pax6b   | 5 | PAX6    | y | Homeodomain; Paired box | 1  |
| ENSDART00000169609  | tefb    | 5 | TEF     | y | bZIP                    | 1  |
| ENSDART00000103640  | hey1    | 5 | HEY1    | y | bHLH                    | 1  |
| ENSDART00000013003  | tfap2b  | 5 | TFAP2B  | y | AP-2                    | 1  |
| ENSDART000000082346 | tfap2a  | 5 | TFAP2A  | y | AP-2                    | 5  |
| ENSDART00000147658  | bhlhe22 | 5 | BHLHE22 | y | bHLH                    | 1  |
| ENSDART00000057644  | lhx4    | 5 | LHX4    | y | Homeodomain             | 1  |
| ENSDART00000009938  | tcf12   | 5 | TCF12   | y | bHLH                    | 1  |
| ENSDART00000065361  | etv5b   | 5 | ETV5    | y | Ets                     | 1  |
| ENSDART00000055709  | her2    | 5 | HES5    | y | bHLH                    | 1  |
| ENSDART00000055706  | her15.1 | 5 | HES5    | y | bHLH                    | 1  |
| ENSDART00000133487  | fosb    | 5 | FOSB    | y | bZIP                    | 3  |
| ENSDART00000151127  | thraa   | 5 | THRA    | y | Nuclear receptor        | 15 |
| ENSDART00000153167  | hlfb    | 5 | HLF     | y | bZIP                    | 2  |
| ENSDART00000086051  | mecom   | 5 | MECOM   | y | C2H2 ZF                 | 1  |
| ENSDART00000023613  | her6    | 5 | HES1    | y | bHLH                    | 1  |
| ENSDART00000031426  | skilb   | 6 | SKIL    | n | Unknown                 | 0  |
| ENSDART00000148066  | znf395b | 6 | ZNF395  | n | C2H2 ZF                 | 0  |
| ENSDART00000125344  | skilb   | 6 | SKIL    | n | Unknown                 | 0  |
| ENSDART00000131361  | kcnip3b | 6 | KCNIP3  | n | Unknown                 | 0  |
| ENSDART00000054020  | hivep3b | 6 | HIVEP3  | n | C2H2 ZF                 | 0  |
| ENSDART00000169283  | znf644b | 6 | ZNF644  | n | C2H2 ZF                 | 0  |
| ENSDART00000100667  | skia    | 6 | SKI     | n | Unknown                 | 0  |
| ENSDART00000100181  | sall3b  | 6 | SALL3   | n | C2H2 ZF                 | 0  |
| ENSDART00000141734  | hivep2a | 6 | HIVEP2  | n | C2H2 ZF                 | 0  |
| ENSDART00000124740  | ncoa2   | 6 | NCOA2   | n | bHLH                    | 0  |
| ENSDART00000164082  | znf609a | 6 | ZNF609  | n | C2H2 ZF                 | 0  |
| ENSDART00000143165  | tsc22d1 | 6 | TS22D1  | n | Unknown                 | 0  |
| ENSDART00000143874  | akna    | 6 | AKNA    | n | AT hook                 | 0  |
| ENSDART00000104279  | znf516  | 6 | ZNF516  | n | C2H2 ZF                 | 0  |
| ENSDART00000165710  | gppp11  | 6 | GPBP11  | n | Unknown                 | 0  |
| ENSDART00000053367  | hmg3    | 6 | HMG3    | n | HMG/Sox                 | 0  |
| ENSDART00000164855  | crebl2  | 6 | CREBL2  | n | bZIP                    | 0  |
| ENSDART00000113286  | phf19   | 6 | PHF1    | n | Unknown                 | 0  |
| ENSDART00000078781  | znf706  | 6 | ZNF706  | n | C2H2 ZF                 | 0  |
| ENSDART00000125174  | nr1i2   | 6 | NR1I2   | y | Nuclear receptor        | 5  |
| ENSDART00000089015  | zbtb7a  | 6 | ZBTB7A  | y | C2H2 ZF                 | 2  |
| ENSDART00000044860  | maff    | 6 | MAFF    | y | bZIP                    | 2  |
| ENSDART00000167844  | mafk    | 6 | MAFK    | y | bZIP                    | 2  |
| ENSDART00000057124  | tefa    | 6 | TEF     | y | bZIP                    | 1  |
| ENSDART00000057125  | tefa    | 6 | TEF     | y | bZIP                    | 1  |
| ENSDART00000163250  | mef2cb  | 6 | MEF2C   | y | MADS box                | 1  |
| ENSDART00000131731  | mef2ca  | 6 | MEF2C   | y | MADS box                | 1  |
| ENSDART00000161387  | tcf12   | 6 | TCF12   | y | bHLH                    | 1  |
| ENSDART00000127099  | nr2e3   | 6 | NR2E3   | y | Nuclear receptor        | 1  |
| ENSDART00000066655  | mybl1   | 6 | MYBL1   | y | Myb/SANT                | 1  |
| ENSDART00000172251  | creb3l1 | 6 | CREB3L1 | y | bZIP                    | 1  |
| ENSDART00000170575  | nfat5b  | 6 | NFAT5   | y | Rel                     | 1  |
| ENSDART00000148106  | mef2aa  | 6 | MEF2A   | y | MADS box                | 3  |
| ENSDART00000075070  | hsf2    | 6 | HSF2    | y | HSF                     | 1  |
| ENSDART00000148353  | usf2    | 6 | USF2    | y | bHLH                    | 2  |
| ENSDART00000061106  | bhlhe41 | 6 | BHLHE41 | y | bHLH                    | 1  |
| ENSDART00000139102  | dbpb    | 6 | DBP     | y | bZIP                    | 1  |
| ENSDART00000077839  | atf7b   | 6 | ATF7    | y | bZIP                    | 1  |
| ENSDART00000045374  | smad3a  | 6 | SMAD3   | y | SMAD                    | 2  |
| ENSDART00000093331  | rreb1a  | 6 | RREB1   | y | C2H2 ZF                 | 1  |
| ENSDART00000148537  | rora    | 6 | RORA    | y | Nuclear receptor        | 1  |
| ENSDART00000123970  | mntb    | 6 | MNT     | y | bHLH                    | 1  |
| ENSDART00000127157  | hlfa    | 6 | HLF     | y | bZIP                    | 2  |
| ENSDART00000126282  | nr1d1   | 6 | NR1D1   | y | Nuclear receptor        | 7  |

Table S8. Gene ontology (GO) analysis of putative Jun transcriptional targets.

| GO.ID      | Term               | Annotated | Significant | Expected | pvalue  | Genes                                                                                                                                                                                                                                                                                                                                                                                                                                                                                                                                                                                                                                                                                                                                                                                                                                                                                                                                                                                                                                                                                                                                                                                                                                                                                                                                                                                                                                                                                                                                                                                                                                                                                                                                                                                                                                                                                                                                                                                                                                                                                                                                                                                                                                                                                                                                                                                                                                                                                                                                                                                                                                                                                                                                                                                                                                                                                                                                    |
|------------|--------------------|-----------|-------------|----------|---------|------------------------------------------------------------------------------------------------------------------------------------------------------------------------------------------------------------------------------------------------------------------------------------------------------------------------------------------------------------------------------------------------------------------------------------------------------------------------------------------------------------------------------------------------------------------------------------------------------------------------------------------------------------------------------------------------------------------------------------------------------------------------------------------------------------------------------------------------------------------------------------------------------------------------------------------------------------------------------------------------------------------------------------------------------------------------------------------------------------------------------------------------------------------------------------------------------------------------------------------------------------------------------------------------------------------------------------------------------------------------------------------------------------------------------------------------------------------------------------------------------------------------------------------------------------------------------------------------------------------------------------------------------------------------------------------------------------------------------------------------------------------------------------------------------------------------------------------------------------------------------------------------------------------------------------------------------------------------------------------------------------------------------------------------------------------------------------------------------------------------------------------------------------------------------------------------------------------------------------------------------------------------------------------------------------------------------------------------------------------------------------------------------------------------------------------------------------------------------------------------------------------------------------------------------------------------------------------------------------------------------------------------------------------------------------------------------------------------------------------------------------------------------------------------------------------------------------------------------------------------------------------------------------------------------------------|
| GO:0003824 | catalytic activity | 5689      | 404         | 355.24   | 0.0414  | abca1a;abcb4;abcf1;abcg2c;abhd14a;abhd4;abl1;acadi;acadvl;ache;acsl2;acsl4a;acsl4b;acss1;adam15;adam23a;adam8a;adam8b;adat2;adhfe1;adkb;adss;agpat4;ahcy;ahcyl1;ahcyl2;ak2;alad;aldh4a1;aldooa;aldocaa;alg6;alpk2;ampd2b;anki1a;apobec2b;arih2;ash1;asns;asph;atic;atp1a1b;atp2a1;atp2b2;atp6ap1b;atp6ap1a;bcat2;blmh;bt;kbub1bb;cad;camk1ga;camk1gb;caml2b2;camkmt;cas9;cbsa;cdc14ab;cdc42bpb;cdc42l;cdk1;cdk2;cdkn1a;cenpe;cers2a;cers4b;ckba;ckl2a;clpp;cmtr1;cmdp2;colgalt2;cracr2ab;csnk1a1;csnk1e;csnk1g1;ctbp2a;cth;cthl;ctsba;ctsc;ctsz;cyb5r1;dad1;dalrd3;dlck1b;ddx54;dgtat1b;dgkab;dhfr;dhx32b;dhx33;dhx57;dip2ba;dnase1l4.1;dpf2;dpf2l;dpb6;dpysl2b;dpysl4;dus2;dusp27;dusp6;dync1h1;dyrk1ab;ebp;ech1;eef1a1l2;eef2b;ehhadh;eif2ak1;eif2s3;eif3ha;eif4a1b;elovl1b;entpd5b;ern2;esd;etfdh;fahd2a;fam213b;fdps;fkbp1a;fkbp5;fkbp9;fts3;fuca1.1;fuca1.2;galm;galns;gars;gba;gbp1;GDPGP1;ggh;gig2o;glrx;glud1a;gna12a;gnpda2;gnsb;gpx4a;GSK3B (1 of many);gstm.1;gstm.2;gtpbbp1;guk1a;hadhb;hctd3;hibadha;hmsba;hmxo1a;hpd1;hspa14;hunk;iars;icmt;idi1;if30;ifit14;ifit16;ilk;impa1;impdh1b;impdh2;inpp4aa;ip6k1;ippk;isg20;jak1;kat5a;kif1b;kif20bb;kif26ab;kif26bb;kif3ca;kif3cb;kif4;kif5c;klc1a;klc3;klc4;klhl21;ksr2;lgmn;lgsn;limk1a;lipf;lox4;lrsam1;lypla1;lypla2;manba;mapk4;mapk9;marcksb;mcm2;mcm5;mcm7;megf8;melk;mettl1;METTL18;mettl2a;mical1;mknk1;moxd1;mri1;msra;mthfd1l;mtm1;mtmr7a;myo10l3;myo18aa;myo19;myo1ea;nars;nat16;nek12;nme2b.1;nme4;nme7;npl;nsdhl;nsun5;nt5c2l1;nudt4b;nudt5;nudt9;oat;otud5a;OTUD7A;oxnad1;pafah1b3;paox1;parp2;parp4;parp8;pbk;pcsk1;pde4ca;pde4cb;pde9a;pdia6;pdk2b;pfkmb;pgam1a;pgm1;pgm2;pgm5;pi3c b;pip5kl1;pitrm1;pkn1a;pla2g15;plcx1d1;pld3;plk1;pmt;pnpla7a;pnpla8;polr1c;polr2eb;polr3ga;ppcdc;ppil1;ppp5c;ppt1;prkx;prmt3;prpsap1;prss16;psen2;psma5;psma6l;psmb1;psmb2;psmc1a;ptges;ptp4a2b;ptp4a3;ptpdc1b;ptpn21;ptpn23a;pygmb;pyroxd2;qars;rab10;rab11bb;rab13;rab20;rab32a;rab3ab;rab41;rab42a;rab43;rabggtb;rabl2;rac1a;ran;rap1b;rap2b;rars;rbbp9;rhbdl3;rhoca;rhot1a;rnaseka;RNF14 (1 of many);rnf19b;rnpep;rps6kb1b;rrad;rragca;rras;rras2;rrm2;rtca;sa1; Sardh;sars;scppdhb;scpep1;sec14l8;sept3;setdb1a;setdb1b;sgk494a;sh3pxd2b;shmt1;si:ch1073-296d18.1;si:ch211-117c9.1;si:ch211-188f17.1;si:ch211-195b13.1;si:ch211-195b15.8;si:ch211-282j22.3;si:ch211-63o20.7;si:ch73-127m5.1;si:dkey-16p21.7;si:dkey-204f11.64;si:dkey-222f8.3;si:dkey-226m8.10;si:dkey-30c15.17;si:dkey-32e23.4;si:dkey-9i23.14;sik1;SLA (1 of many);slc3a2a;smarca5;smarcad1b;smox;smpp1;sod3b;spast;spra;spbs4a;src;srpk1a;st3gal3b;stambpl1;steap4;sult5a1;sult6b1;suox;tars;tcirg1b;tgml11;tmprss9;top1mt;tpte;trmt61a;tuba2;tuba8l;tubb4b;txn;tyr;uap1l1;ube2c;ube2e1;uck2a;uck2b;ugdh;umps;uqcrq;usp18;vcp;vcpi1;wars;wds1b;wee1;zak;zdhhc12b;zgc:101663;zgc:103438;zgc:110269;zgc:112285;zgc:152830;zgc:153031;zgc:158659;zgc:162396;zgc:171704;zgc:198419;zgc:77752;zgc:92066 |
| GO:0016787 | hydrolase activity | 2346      | 180         | 146.49   | 0.03182 | abca1a;abcb4;abcf1;abcg2c;abhd14a;abhd4;ache;adam15;adam23a;adam8a;adam8b;adat2;ahcy;ahcyl1;ahcyl2;ampd2b;apobec2b;atic;atp1a1b;atp2a1;atp2b2;atp6ap1b;atp6ap1a;blmh;cad;cas9;cdc14ab;cdc42l;cenpe;clpp;cmdp2;cracr2ab;ctsba;ctsc;ctsz;ddx54;dhx32b;dhx33;dhx57;dnase1l4.1;dpysl2b;dpysl4;dusp27;dusp6;dync1h1;eef1a1l2;eef2b;eif2s3;eif3ha;eif4a1b;entpd5b;ern2;esd;fuca1.1;fuca1.2;galns;gba;gbp1;ggh;gna12a;gnpda2;gnsb;gtpbbp1;hspa14;iars;idi1;impa1;inpp4aa;isg20;kif1b;kif20bb;kif26ab;kif26bb;kif3ca;kif3cb;kif4;kif5c;klc1a;klc3;klc4;lgmn;lipf;lypla1;lypla2;manba;mcm2;mcm5;mcm7;megf8;mthfd1l;mtm1;mtmr7a;myo10l3;myo18aa;myo19;myo1ea;nt5c2l1;nudt4b;nudt5;nudt9;otud5a;OTUD7A;pafah1b3;pcsk1;pde4ca;pde4cb;pde9a;plcx1d1;pnpla7a;pnpla8;ppp5c;ppt1;prss16;psen2;psma5;psma6l;psmb1;psmb2;psmc1a;ptp4a2b;ptp4a3;ptpdc1b;ptpn21;ptpn23a;rab10;rab11bb;rab13;rab20;rab32a;rab3ab;rab41;rab42a;rab43;rabl2;rac1a;ran;rap1b;rap2b;rbbp9;rhbdl3;rhoca;rhot1a;rnaseka;rnpep;rrad;rragca;rras;rras2;scpep1;sec14l8;sept3;si:ch211-195b15.8;si:ch211-282j22.3;si:ch73-127m5.1;si:dkey-204f11.64;si:dkey-222f8.3;si:dkey-226m8.10;si:dkey-30c15.17;si:dkey-32e23.4;si:dkey-9i23.14;smarca5;smarcad1b;smpp1;spast;stambpl1;tcirg1b;tmprss9;tpte;tuba2;tuba8l;tubb4b;usp18;vcp;vcpi1;zgc:103438;zgc:110269;zgc:112285;zgc:152830;zgc:171704;zgc:77752                                                                                                                                                                                                                                                                                                                                                                                                                                                                                                                                                                                                                                                                                                                                                                                                                                                                                                                                                                                                                                                                                                                                                                                                                                                                                                                                                                                                                                                                                                                                                                                  |
| GO:0005525 | GTP binding        | 518       | 47          | 32.35    | 0.0064  | adss;anxa6;arf1;ARL3 (1 of many);arl8a;arl8bb;cdc42l;cracr2ab;eef1a1l2;eef2b;eif2s3;gbp1;gna12a;gnl3;gtpbbp1;gtpbbp4;megf8;rab10;rab11bb;rab13;rab20;rab32a;rab3ab;rab41;rab42a;rab43;rabl2;rac1a;ran;rap1b;rap2b;rhoca;rhot1a;rrad;rragca;rras;rras2;sec14l8;sept3;si:dkey-32e23.4;si:dkey-98f17.5;si:dkey-69e1.8;tuba2;tuba8l;tubb4b;zgc:171704;zgc:77650                                                                                                                                                                                                                                                                                                                                                                                                                                                                                                                                                                                                                                                                                                                                                                                                                                                                                                                                                                                                                                                                                                                                                                                                                                                                                                                                                                                                                                                                                                                                                                                                                                                                                                                                                                                                                                                                                                                                                                                                                                                                                                                                                                                                                                                                                                                                                                                                                                                                                                                                                                              |
| GO:0008289 | lipid binding      | 384       | 40          | 23.98    | 0.02919 | acbd5a;adap2;aida;anxa6;apobec;col4a3bpa;col4a3bpb;cpne3;cpne9;esy1a;fabp11a;fabp7a;fermt2;hs1bp3;melk;osbpl1a;pcsin3;picalm;prom1b;pxdc1a;rasal3b;rbp1;rbp2a;rbp7b;rlbp1a;sdca;sdcbp2;sh3pxd2b;si:ch211-195b13.1;si:dkey-231j24.3;snx12;snx19a;sptbn1;sptbn2;syf4;syf5a;syf6a;tex2;vcp;vps36                                                                                                                                                                                                                                                                                                                                                                                                                                                                                                                                                                                                                                                                                                                                                                                                                                                                                                                                                                                                                                                                                                                                                                                                                                                                                                                                                                                                                                                                                                                                                                                                                                                                                                                                                                                                                                                                                                                                                                                                                                                                                                                                                                                                                                                                                                                                                                                                                                                                                                                                                                                                                                            |
| GO:0003924 | GTPase activity    | 347       | 37          | 21.67    | 0.00103 | cdc42l;cracr2ab;eef1a1l2;eef2b;eif2s3;gbp1;gna12a;gtpbbp1;megf8;rab10;rab11bb;rab13;rab20;rab32a;rab3ab;rab41;rab42a;rab43;rabl2;rac1a;ran;rap1b;rap2b;rhoca;rhot1a;rrad;rragca;rras;rras2;sec14l8;sept3;si:dkey-204f11.64;si:dkey-32e23.4;tuba2;tuba8l;tubb4b;zgc:171704                                                                                                                                                                                                                                                                                                                                                                                                                                                                                                                                                                                                                                                                                                                                                                                                                                                                                                                                                                                                                                                                                                                                                                                                                                                                                                                                                                                                                                                                                                                                                                                                                                                                                                                                                                                                                                                                                                                                                                                                                                                                                                                                                                                                                                                                                                                                                                                                                                                                                                                                                                                                                                                                |

|            |                                                                 |     |    |       |         |                                                                                                                                                                                                           |
|------------|-----------------------------------------------------------------|-----|----|-------|---------|-----------------------------------------------------------------------------------------------------------------------------------------------------------------------------------------------------------|
| GO:0016887 | ATPase activity                                                 | 315 | 28 | 19.67 | 0.03947 | abca1a;abcb4;abcf1;abcg2c;atp1a1b;atp2a1;atp2b2;atp6ap1b;atp6ap1la;cenpe;ddx54;dhx32b;dhx33;dhx57;eif4a1b;hspa14;kif1b;kif20bb;kif3ca;kif3cb;kif4;kif5c;psmc1a;si:dkey-226m8.10;smarca5;spast;tcirg1b;vcp |
| GO:0008017 | microtubule binding                                             | 179 | 25 | 11.18 | 0.00647 | camsap2a;camsap3;ccdc88b;ccsapb;cenpe;clasp2;dpysl2b;eml1;jakmip3;kif1b;kif20bb;kif26ab;kif26bb;kif3ca;kif3cb;kif4;kif5c;map6b;mapre1b;mapre3b;nusap1;pafah1b1a;prc1b;si:dkey-32e23.4;spast               |
| GO:0005085 | guanyl-nucleotide exchange factor activity                      | 165 | 21 | 10.3  | 0.04798 | arhgef10l;arhgef2;arhgef3;arhgef4;cyth1a;dennd5b;dennd6aa;dock11;dock9b;kalrna;mcf2b;mcf2l2;mcf2la;rabif;rapgef1a;rapgef4;rasgef1bb;sec61b;sh2d3ca;si:dkey-38p12.3;tiam2a                                 |
| GO:0004725 | protein tyrosine phosphatase activity                           | 112 | 12 | 6.99  | 0.04675 | cdc14ab;dup6;mtm1;mtmr7a;ptp4a2b;ptp4a3;ptpdc1b;ptpn21;ptpn23a;si:ch211-195b15.8;tpte;zgc:77752                                                                                                           |
| GO:0019843 | rRNA binding                                                    | 32  | 11 | 2     | 0.00013 | cirbpb;nop53;ppan;rpl12;rpl23;rpl5b;rpl8;rpl9;rps18;rps4x;rps9                                                                                                                                            |
| GO:0003743 | translation initiation factor activity                          | 61  | 11 | 3.81  | 0.00125 | eif2s1a;eif2s1b;eif2s2;eif2s3;eif3ba;eif3ha;eif3i;eif3m;eif4a1b;eif4g2a;eif6                                                                                                                              |
| GO:0000149 | SNARE binding                                                   | 90  | 11 | 5.62  | 0.01428 | napga;snap25a;stx11a;stx11b.1;stx11b.2;stx12;stx3a;stx4;syf4;syf5a;syf6a                                                                                                                                  |
| GO:0051082 | unfolded protein binding                                        | 87  | 11 | 5.43  | 0.01927 | cct4;cct8;hsp90aa1.2;hsp90ab1;hspa14;pfdn1;pfdn2;pfdn4;ssuh2.2;ssuh2.4;tcp1                                                                                                                               |
| GO:0005089 | Rho guanyl-nucleotide exchange factor activity                  | 86  | 10 | 5.37  | 0.0414  | arhgef10l;arhgef2;arhgef3;arhgef4;kalrna;mcf2b;mcf2l2;mcf2la;si:dkey-38p12.3;tiam2a                                                                                                                       |
| GO:0008138 | protein tyrosine/serine/threonine phosphatase activity          | 57  | 9  | 3.56  | 0.01616 | cdc14ab;dup27;dup6;ptp4a2b;ptp4a3;ptpdc1b;si:ch211-195b15.8;tpte;zgc:77752                                                                                                                                |
| GO:0005484 | SNAP receptor activity                                          | 34  | 8  | 2.12  | 0.00095 | sec22bb;snap25a;stx11a;stx11b.1;stx11b.2;stx12;stx3a;stx4                                                                                                                                                 |
| GO:0003746 | translation elongation factor activity                          | 27  | 7  | 1.69  | 0.00107 | eef1a1l2;eef1b2;eef1db;eef1g;eef2b;eif5a2;gtpbp1                                                                                                                                                          |
| GO:0004715 | non-membrane spanning protein tyrosine kinase activity          | 41  | 7  | 2.56  | 0.01262 | abl1;btck;jak1;melk;SLA (1 of many);src;wee1                                                                                                                                                              |
| GO:0031492 | nucleosomal DNA binding                                         | 44  | 7  | 2.75  | 0.01831 | CU459186.1;hmgm3;si:ch211-113a14.12;si:dkey-108k21.14;si:dkey-261m9.12;zgc:153405;zgc:173552                                                                                                              |
| GO:0017049 | GTP-Rho binding                                                 | 18  | 6  | 1.12  | 0.00057 | anln;cdc42ep1a;cdc42ep2;cdc42ep5;pkn1a;zgc:154093                                                                                                                                                         |
| GO:0030170 | pyridoxal phosphate binding                                     | 43  | 6  | 2.69  | 0.04941 | cbsa;cth;cthl;oat;pygmb;shmt1                                                                                                                                                                             |
| GO:0043022 | ribosome binding                                                | 23  | 5  | 1.44  | 0.0448  | c1qbp;eif2s1a;eif2s1b;eif5a2;eif6                                                                                                                                                                         |
| GO:0051010 | microtubule plus-end binding                                    | 9   | 4  | 0.56  | 0.00148 | clasp2;mapre1b;mapre3b;pafah1b1a                                                                                                                                                                          |
| GO:0044325 | ion channel binding                                             | 21  | 4  | 1.31  | 0.03861 | cbarpb;rims1b;scn1bb;si:ch211-126j24.1                                                                                                                                                                    |
| GO:0031386 | protein tag                                                     | 10  | 3  | 0.62  | 0.02092 | rps27a;sumo2b;uba52                                                                                                                                                                                       |
| GO:0070840 | dynein complex binding                                          | 10  | 3  | 0.62  | 0.02092 | cenpf;dctn1b;pafah1b1a                                                                                                                                                                                    |
| GO:0008474 | palmitoyl-(protein) hydrolase activity                          | 11  | 3  | 0.69  | 0.02745 | lypla1;lypla2;ppt1                                                                                                                                                                                        |
| GO:0008199 | ferric iron binding                                             | 12  | 3  | 0.75  | 0.03494 | zgc:109934;zgc:198419;zgc:92066                                                                                                                                                                           |
| GO:0003962 | cystathionine gamma-synthase activity                           | 2   | 2  | 0.12  | 0.0039  | cth;cthl                                                                                                                                                                                                  |
| GO:0004123 | cystathionine gamma-lyase activity                              | 2   | 2  | 0.12  | 0.0039  | cth;cthl                                                                                                                                                                                                  |
| GO:0004146 | dihydrofolate reductase activity                                | 2   | 2  | 0.12  | 0.0039  | dhfr;zgc:153031                                                                                                                                                                                           |
| GO:0004614 | phosphoglucomutase activity                                     | 2   | 2  | 0.12  | 0.0039  | pgm1;pgm5                                                                                                                                                                                                 |
| GO:0004814 | arginine-tRNA ligase activity                                   | 3   | 2  | 0.19  | 0.0112  | dalrd3;rars                                                                                                                                                                                               |
| GO:0004560 | alpha-L-fucosidase activity                                     | 3   | 2  | 0.19  | 0.0112  | fuca1.1;fuca1.2                                                                                                                                                                                           |
| GO:0003938 | IMP dehydrogenase activity                                      | 3   | 2  | 0.19  | 0.0112  | impdh1b;impdh2                                                                                                                                                                                            |
| GO:0046592 | polyamine oxidase activity                                      | 3   | 2  | 0.19  | 0.0112  | paox1;smox                                                                                                                                                                                                |
| GO:0043515 | kinetochore binding                                             | 3   | 2  | 0.19  | 0.0112  | clasp2;spd1                                                                                                                                                                                               |
| GO:0046933 | proton-transporting ATP synthase activity, rotational mechanism | 4   | 2  | 0.25  | 0.02148 | atp6ap1b;atp6ap1la                                                                                                                                                                                        |
| GO:0008097 | 5S rRNA binding                                                 | 4   | 2  | 0.25  | 0.02148 | nop53;rpl5b                                                                                                                                                                                               |
| GO:0005159 | insulin-like growth factor receptor binding                     | 5   | 2  | 0.31  | 0.03432 | igf1;socs2                                                                                                                                                                                                |
| GO:0005528 | FK506 binding                                                   | 5   | 2  | 0.31  | 0.03432 | fkbp1aa;fkbp5                                                                                                                                                                                             |
| GO:0004332 | fructose-bisphosphate aldolase activity                         | 5   | 2  | 0.31  | 0.03432 | aldoaa;aldoca                                                                                                                                                                                             |
| GO:0008022 | protein C-terminus binding                                      | 5   | 2  | 0.31  | 0.03432 | pdzd11;sae1                                                                                                                                                                                               |
| GO:0015232 | heme transporter activity                                       | 6   | 2  | 0.37  | 0.04938 | flvcr1;flvcr2b                                                                                                                                                                                            |
| GO:0051011 | microtubule minus-end binding                                   | 6   | 2  | 0.37  | 0.04938 | camsap2a;camsap3                                                                                                                                                                                          |
| GO:0003708 | retinoic acid receptor activity                                 | 6   | 2  | 0.37  | 0.04938 | nr1d4b;rarab                                                                                                                                                                                              |



|            |                                  |      |     |        |         |                                                                                                                                                                                                                                                                                                                                                                                                                                                                                                                                                                                                                                                                                                                                                                                                                                                                                                                                                                                                                                                                                                                                                                                                                                                                                                                                                                                                                                                                                                                                                                                                     |
|------------|----------------------------------|------|-----|--------|---------|-----------------------------------------------------------------------------------------------------------------------------------------------------------------------------------------------------------------------------------------------------------------------------------------------------------------------------------------------------------------------------------------------------------------------------------------------------------------------------------------------------------------------------------------------------------------------------------------------------------------------------------------------------------------------------------------------------------------------------------------------------------------------------------------------------------------------------------------------------------------------------------------------------------------------------------------------------------------------------------------------------------------------------------------------------------------------------------------------------------------------------------------------------------------------------------------------------------------------------------------------------------------------------------------------------------------------------------------------------------------------------------------------------------------------------------------------------------------------------------------------------------------------------------------------------------------------------------------------------|
| GO:0006468 | protein phosphorylation          | 1204 | 213 | 214.97 | 0.04144 | aak1a;aatka;abl1;acsl4a;ACVR1C;adcyp1b;adgrg1;aida;akt3a;alpk2;ankrd6b;aplnrb;atg13;bcr;bmp3;bmp4;bmpr2a;bsk146;btb;bub1bb;cab391;cab391l1;camk1a;camk1b;camk1db;camk2a;camk2b1;camk2d1;camk2d2;camk2g1;camk2n1a;camk4;camkk1a;camkk1b;camkva;camkvb;camkvl;cart2;cart3;cb1;ccna2;ccnb1;ccng1;ccni;ccnj1;cdc42bpab;cdk1;cdk14;cdk15;cdk17;CDK18;cdk5r1a;cdk5r1b;cdk5r2a;cdk5r2b;cdkn1a;cds1;csnk1e;CT990561.1;dapk2a;dclk1a;dclk1b;dclk2a;depor;dicp3.1;dicp3.3;dup5;dyrk1ab;dyrk2;eif2ak1;eif2ak2;ek1;enpp1;epha4b;epha6;ephb1;ephb2a;ephb6;erbb4b;ern2;fgfr4;gadd45ba;gadd45ga;gc2;gcn1;ghra;gprc5ba;gprc5bb;grk7a;gsk3aa;GSK3B (1 of many);hipk2;hunk;igf1rb;il6st;ilk;inhbaa;inpp5jb;insra;jak1;kcnh1a;kcnh3;kcnh4b;kcnh5a;kcnh5b;kita;ksr2;lepr;limk1a;map2k2b;MAP3K13;map4k4;mapk11;mapk4;mapk9;mark1;mark4a;mast1a;mast3b;melk;mknk1;mknk2a;mstnb;mylk5;myo3b;nek12;nek6;ntrk3a;ntrk3b;nuak1b;nuak2;oxsr1a;pak1;pak2b;pbk;pdk2a;pdk2b;pdk3b;pdpk1a;pepb1;pik3cb;pim1;pim3;pimr138;pkn3;pkz;plk1;plk2a;ppp2r5b;prkacbb;prkca;prkcd;prkceb;prkccq;prkd1;prkg2;prkx;prnpb;prok1;qars;rap1b;riok1;rps6ka3a;rps6ka5;rps6kb1b;rps6kl1;sgk1;sgk494a;sgk494b;sh2d3ca;sh3bp5b;sh3rf1;sh3rf2;si:ch1073-184j22.2;si:ch211-117c9.1;si:ch211-147h1.4;si:ch211-191i18.4;si:ch211-195b13.1;si:ch211-195b15.8;si:ch211-255i3.4;si:ch73-60h1.1;si:ch73-62l21.1;si:dkey-16p21.7;si:dkey-17m8.1;si:dkey-240h12.4;sik1;sik2a;SLA (1 of many);slkb;smarca4a;snrkb;spegb;spry2;spry4;src;srpk1b;stk17a;stk35;stk40;taok1b;tesk2;tfgb2;tfgb3;tnika;tnk2b;trib2;trib3;unc119a;unc119b;unm_sa1261;wee1;zak;zgc:158659 |
| GO:0050790 | regulation of catalytic activity | 883  | 180 | 157.66 | 0.0051  | acap3b;adcyp1b;agap1;agap3;aida;alox5ap;anos1a;anos1b;appb;arap3;arhgap10;arhgap12b;arhgap21a;arhgap23b;arhgap32a;arhgap33;arhgap4b;arhgdia;arhgdig;asap1b;asap2a;atg13;atp1b1b;atp1b2a;atp1b3a;atp1b3b;aup1;baxa;ba xb;bbc3;bcl2l1;bcr;birc7;calm1b;calm3a;camk2n1a;cap2;cart2;cart3;cb1;ccna2;ccnb1;ccng1;ccni;ccnj1;cdk5r1a;cdk5r1b;cdk5r2a;cdk5r2b;cdkn1a;chn1;cish;cst14a.2;cst14b.1;ctsba;dab2ipa;dab2ipb;depor;DOCK4 (1 of many);dup5;dynll1;dynll2a;dynll2b;elmod1;ensaa;ensab;esco2;gadd45ba;gadd45ga;gchfr;gcn1;gdi1;git2a;gprc5ba;gprc5bb;gpsm1a;gpsm2;grpel1;guca1a;guca1b;guca1c;guca1g;hdr;hip1;hmha1a;igf1rb;iqgap2;map2k2b;MAP3K13;map4k4;mcm2;ncf2;nek12;oaz1b;oaz2b;oxsr1a;pafah1b1a;pak1;pak2b;pcsk1n1;phactr3b;pik3r11;pik3r3a;pik3r3b;plxna2;ppifb;ppp1r14aa;ppp1r14ba;ppp1r1b;ppp1r3cb;ppp2r2bb;ppp2r2cb;ppp2r5b;prkab1a;prnpb;prok1;prpsap1;psmd1;psmd3;qars;rap1b;rap1gap;rap1gap2a;rap1gap2b;RAP1GDS1;rasgef1bb;rcan1a;rcan2;rcan3;rgl3a;rgs6;rgs8;rictora;rxfp2a;sec23b;serpine3;serpinh1a;serpini1;sgsm1b;sh3bp5b;sh3pxd2b;si:ch1073-184j22.2;si:ch211-191i18.4;si:ch211-195b11.3;si:ch211-195b15.7;si:ch211-195b15.8;si:ch211-255i3.4;si:ch211-270g19.5;si:dkey-17m8.1;si:dkey-203a12.8;si:dkey-242g16.2;si:dkey-77g12.1;slkb;smarca4a;socs2;spry2;spry4;srgap1a;srgap1b;srgap2;stxbp5a;syngap1b;taok1b;tbc1d10ab;tbc1d12a;tbc1d17;tbc1d25;tbc1d4;tiam1a;timp2b;timp4.3;tnika;trappc6bl;trib2;trib3;unc119a;unc119b;zak                                                                                                                                                 |
| GO:0007010 | cytoskeleton organization        | 787  | 180 | 140.52 | 0.04594 | abl1;ablim1b;ablim3;ache;actr3b;add3a;afap1;ajuba;anln;ap1ar;apc;apc2;arhgef10lb;arhgef11;atat1;baiap2a;bcar1;CABZ01044277.1;CABZ01118678.1;calm1b;calm3a;camsap3;cap2;capza1a;cbfb;ccdc88b;ccsapb;ccs5;cetn2;cfap206;cfl1;clasp2;clstn1;cnn3a;coro1cb;coro2ba;coro2bb;CU639469.1;dbn1;dchs1b;diaph3;dlg1;dmtn;dpysl2b;dpysl3;DST;dup5;dyrc1li2;efg;eml1;epb41b;epb41l3a;espnl1a;evla;fermt2;fln1cb;fmln2a;fmln3;fmd5;fscn1a;fscn1b;fscn2a;fscn2b;GAN;grip2a;gsna;havcr1;hip1;hook1;inpp5jb;iqsec3a;iqsec3b;katnb1;kif11;kif4;lima1a;lrm;map1aa;map1ab;map2;map4l;map6a;map6b;map6d1;map7a;map7d1a;map7d2b;mapre1b;mapre2;mapre3b;maptb;mark1;mark4a;mast1a;mef2aa;mef2d;mical3b;myom2a;nckap1;nusap1;pacsin1a;pafah1b1a;pafah1b1b;pfm2;pgm5;pleca;pls3;ppp1r9a;ppp1r9bb;prc1b;rac3a;rac3b;racgap1;rhobtb1;rhoca;rhogb;rhoua;rictora;rnd1a;rnd1b;sdca;sdcbp;sdcbp2;sept15;sept3;sept5a;sept5b;shroom2a;si:ch211-114n24.6;si:ch211-207i1.2;si:ch73-199e17.1;si:dkey-56f14.7;si:dkeyp-57f11.2;si:sorbs1;si:sorbs2;si:sorbs3;spag1a;specc1;specc1b;spire1b;spire2;ssh1b;ssh2b;stmn2a;stmn2b;stmn3;stmn4;stmn4l;sun1;syne2b;tacc1;tmod2;tmsb;tmsb2;tnnt2c;tnnt3b;tpm3;triobpa;tuba1a;tuba1b;tuba1c;tuba2;tuba8l;tuba8l3;tuba8l4;tubb2;tubb2b;tubb4b;tubb5;vangl2;vcp;vil1;wasf3a;xirp2a;zgc:152977;zgc:153426;zgc:154093;zgc:65894;zgc:86764                                                                                                                                                                                                                                                            |



|            |                                    |     |     |        |         |                                                                                                                                                                                                                                                                                                                                                                                                                                                                                                                                                                                                                                                                                                                                                                                                                                                                                                                                                                                                                                                                                                                                                                                                                                                                                                                                                                                                                                                                                                                                                                                                                                                                                                                                                                                                                                                                                                                                                                                                                                                                                                                                                                                                                                                                                                                                                                                                                                                                                                                                                                                                                                                                                                                                                                                                                                                                                                                                                                                                                                                                                                                                                                                                                                                                                                                                                                                                                                                                                                                                                                                                                                                                                                                                                                                                                                                                                                                                                                                                                                                                                                                                                                                                                                                                                                                                                                                                                                                                                                                                                                                                                                                                                                                                                                                                                                                                                                                                                                                                                                                                                                                                                                                                                                                                                                                                                                                                                                                                                                                                                                                                                                                                                         |
|------------|------------------------------------|-----|-----|--------|---------|-----------------------------------------------------------------------------------------------------------------------------------------------------------------------------------------------------------------------------------------------------------------------------------------------------------------------------------------------------------------------------------------------------------------------------------------------------------------------------------------------------------------------------------------------------------------------------------------------------------------------------------------------------------------------------------------------------------------------------------------------------------------------------------------------------------------------------------------------------------------------------------------------------------------------------------------------------------------------------------------------------------------------------------------------------------------------------------------------------------------------------------------------------------------------------------------------------------------------------------------------------------------------------------------------------------------------------------------------------------------------------------------------------------------------------------------------------------------------------------------------------------------------------------------------------------------------------------------------------------------------------------------------------------------------------------------------------------------------------------------------------------------------------------------------------------------------------------------------------------------------------------------------------------------------------------------------------------------------------------------------------------------------------------------------------------------------------------------------------------------------------------------------------------------------------------------------------------------------------------------------------------------------------------------------------------------------------------------------------------------------------------------------------------------------------------------------------------------------------------------------------------------------------------------------------------------------------------------------------------------------------------------------------------------------------------------------------------------------------------------------------------------------------------------------------------------------------------------------------------------------------------------------------------------------------------------------------------------------------------------------------------------------------------------------------------------------------------------------------------------------------------------------------------------------------------------------------------------------------------------------------------------------------------------------------------------------------------------------------------------------------------------------------------------------------------------------------------------------------------------------------------------------------------------------------------------------------------------------------------------------------------------------------------------------------------------------------------------------------------------------------------------------------------------------------------------------------------------------------------------------------------------------------------------------------------------------------------------------------------------------------------------------------------------------------------------------------------------------------------------------------------------------------------------------------------------------------------------------------------------------------------------------------------------------------------------------------------------------------------------------------------------------------------------------------------------------------------------------------------------------------------------------------------------------------------------------------------------------------------------------------------------------------------------------------------------------------------------------------------------------------------------------------------------------------------------------------------------------------------------------------------------------------------------------------------------------------------------------------------------------------------------------------------------------------------------------------------------------------------------------------------------------------------------------------------------------------------------------------------------------------------------------------------------------------------------------------------------------------------------------------------------------------------------------------------------------------------------------------------------------------------------------------------------------------------------------------------------------------------------------------------------------------------------------------------------|
| GO:0048666 | neuron development                 | 570 | 177 | 101.77 | 0.01571 | ache;adcyl1b;adcyp1b;agrn;alcamb;aldoaa;amigo1;anos1a;apc;appb;arl3l1;arl3l2;asah1b;ascl1a;atat1;atp2b1a;bbs4;bbs5;bdnf;bsg;CABZ01118678.1;cad;camsap3;capn1a;casp3a;casp9;ccsapp;cdh4;chd7;clstn1;cnp;cntfr;cntn2;cntn3a.1;col19a1;ctbp2a;cxcl12b;cyfip2;diras1a;dpysl2b;dpysl3;dpysl4;dpysl5a;dscama;e2f8;efna2a;epha4b;etv1;etv5b;ewsr1b;fryb;fus;gldn;gpm6ab;gprc5ba;gprc5bb;grip1;grna;hcn1;hecw2a;hmx1;jil6st;inab;inpp5jb;insm1a;irx4a;isl2a;islr2;kcnc3a;kctd13;kif1b;kif3a;kif5ab;kif5c;lgmn;lingo1a;lingo1b;llph;map1aa;map1ab;map2;map4k4;map4l;maptb;mccln1a;mecp2;ncam1a;ncam1b;nckap1;ndrg4;nefma;nexn;nfasca;ninl;nptna;nptnb;nrp1a;nrp2a;nrxn2a;nsfa;nyap2a;nyap2b;olfm1a;pacsin1a;pak1;pcdh18b;plppr4b;pls3;plxna2;ppp1r9a;ppp1r9bb;prmt8b;ptprfa;rab10;rac1a;rb1;rbpms2a;rbpms2b;robo2;robo3;robo4;rprip1;rtn4a;rtn4r;scn8aa;sema3fa;sema3ga;sema3gb;sema4aa;sema4bb;sema6bb;sema6e;sema7a;shank1;shank2;si:ch1073-450f2.1;si:ch211-113g11.6;si:ch211-129c21.1;si:dkey-16p21.7;skia;skib;skilb;slc33a1;slit2;slitrk2;slitrk3a;slitrk3b;slitrk4;slitrk6;snap25b;sox11a;sox11b;srp2;ssh1b;ssh2b;stat3;stmn2a;stmn2b;stmn3;stmn4;stmn4l;tbx2b;tenm1;TENM2;tenm3;tenm4;thrb;tmem106bb;tmem59l;tnika;tnr;uba1;vangl2;zfyve27;zgc:77784                                                                                                                                                                                                                                                                                                                                                                                                                                                                                                                                                                                                                                                                                                                                                                                                                                                                                                                                                                                                                                                                                                                                                                                                                                                                                                                                                                                                                                                                                                                                                                                                                                                                                                                                                                                                                                                                                                                                                                                                                                                                                                                                                                                                                                                                                                                                                                                                                                                                                                                                                                                                                                                                                                                                                                                                                                                                                                                                                                                                                                                                                                                                                                                                                                                                                                                                                                                                                                                                                                                                                                                                                                                                                                                                                                                                                                                                                                                                                                                                                                                                                                                                                                                                                                                                                                                                                                                                                                     |
| GO:0007268 | chemical synaptic transmission     | 352 | 147 | 62.85  | 0.00147 | adcyp1b;apba1a;bdnf;CABZ01081780.1;cacna1aa;cacna1bb;cacnb1;cacnb2a;cacnb3a;cacnb3b;cacng2a;cacng3b;cacng5a;cacng7b;cacng8b;cadpsb;calb2a;calb2b;chata;chrn4a;chrn5a;chrna10a;chrna6;chrnb2a;chrnb3a;chrnb3b;clstn1;clstn2;clstn3;cplx2;cplx2l;cplx3b;cplx4a;cplx4b;CR382281.1;dlg1;dlg3;dlg4a;dlgap1b;dlgap2a;drd4a;gabra1;gabra3;gabra5;gabra6b;gabbr1;gabbr2;gabbr3;gabbr4;gabrd;gabrg2;gabrr1;gabrr2a;glra1;glra2;glra3;glra4b;glrba;glrb;grik1a;grik1b;GRIK3;grik4;grin2aa;grin2ab;grm1a;grm1b;grm2a;grm4;grm6a;grm6b;grm8a;grm8b;hcn1;htr2cl1;htr7c;kat2a;kcnc3;lin7a;napaa;napab;napba;napbb;neto1;nlg1;nlg2a;nlg3a;nlg3b;nlg3c;nlg3d;nlg3e;nlg3f;nlg3g;nlg3h;nlg3i;nlg3j;nlg3k;nlg3l;nlg3m;nlg3n;nlg3o;nlg3p;nlg3q;nlg3r;nlg3s;nlg3t;nlg3u;nlg3v;nlg3w;nlg3x;nlg3y;nlg3z;nlg3aa;nlg3ab;nlg3ac;nlg3ad;nlg3ae;nlg3af;nlg3ag;nlg3ah;nlg3ai;nlg3aj;nlg3ak;nlg3al;nlg3am;nlg3an;nlg3ao;nlg3ap;nlg3aq;nlg3ar;nlg3as;nlg3at;nlg3au;nlg3av;nlg3aw;nlg3ax;nlg3ay;nlg3az;nlg3ba;nlg3bb;nlg3bc;nlg3bd;nlg3be;nlg3bf;nlg3bg;nlg3bh;nlg3bi;nlg3bj;nlg3bk;nlg3bl;nlg3bm;nlg3bn;nlg3bo;nlg3bp;nlg3bq;nlg3br;nlg3bs;nlg3bt;nlg3bu;nlg3bv;nlg3bw;nlg3bx;nlg3by;nlg3bz;nlg3ca;nlg3cb;nlg3cc;nlg3cd;nlg3ce;nlg3cf;nlg3cg;nlg3ch;nlg3ci;nlg3cj;nlg3ck;nlg3cl;nlg3cm;nlg3cn;nlg3co;nlg3cp;nlg3cq;nlg3cr;nlg3cs;nlg3ct;nlg3cu;nlg3cv;nlg3cw;nlg3cx;nlg3cy;nlg3cz;nlg3da;nlg3db;nlg3dc;nlg3dd;nlg3de;nlg3df;nlg3dg;nlg3dh;nlg3di;nlg3dj;nlg3dk;nlg3dl;nlg3dm;nlg3dn;nlg3do;nlg3dp;nlg3dq;nlg3dr;nlg3ds;nlg3dt;nlg3du;nlg3dv;nlg3dw;nlg3dx;nlg3dy;nlg3dz;nlg3ea;nlg3eb;nlg3ec;nlg3ed;nlg3ee;nlg3ef;nlg3eg;nlg3eh;nlg3ei;nlg3ej;nlg3ek;nlg3el;nlg3em;nlg3en;nlg3eo;nlg3ep;nlg3eq;nlg3er;nlg3es;nlg3et;nlg3eu;nlg3ev;nlg3ew;nlg3ex;nlg3ey;nlg3ez;nlg3fa;nlg3fb;nlg3fc;nlg3fd;nlg3fe;nlg3ff;nlg3fg;nlg3fh;nlg3fi;nlg3fj;nlg3fk;nlg3fl;nlg3fm;nlg3fn;nlg3fo;nlg3fp;nlg3fq;nlg3fr;nlg3fs;nlg3ft;nlg3fu;nlg3fv;nlg3fw;nlg3fx;nlg3fy;nlg3fz;nlg3ga;nlg3gb;nlg3gc;nlg3gd;nlg3ge;nlg3gf;nlg3gg;nlg3gh;nlg3gi;nlg3gj;nlg3gk;nlg3gl;nlg3gm;nlg3gn;nlg3go;nlg3gp;nlg3gq;nlg3gr;nlg3gs;nlg3gt;nlg3gu;nlg3gv;nlg3gw;nlg3gx;nlg3gy;nlg3gz;nlg3ha;nlg3hb;nlg3hc;nlg3hd;nlg3he;nlg3hf;nlg3hg;nlg3hh;nlg3hi;nlg3hj;nlg3hk;nlg3hl;nlg3hm;nlg3hn;nlg3ho;nlg3hp;nlg3hq;nlg3hr;nlg3hs;nlg3ht;nlg3hu;nlg3hv;nlg3hw;nlg3hx;nlg3hy;nlg3hz;nlg3ia;nlg3ib;nlg3ic;nlg3id;nlg3ie;nlg3if;nlg3ig;nlg3ih;nlg3ii;nlg3ij;nlg3ik;nlg3il;nlg3im;nlg3in;nlg3io;nlg3ip;nlg3iq;nlg3ir;nlg3is;nlg3it;nlg3iu;nlg3iv;nlg3iw;nlg3ix;nlg3iy;nlg3iz;nlg3ja;nlg3jb;nlg3jc;nlg3jd;nlg3je;nlg3jf;nlg3jg;nlg3jh;nlg3ji;nlg3jj;nlg3jk;nlg3jl;nlg3jm;nlg3jn;nlg3jo;nlg3jp;nlg3jq;nlg3jr;nlg3js;nlg3jt;nlg3ju;nlg3jv;nlg3jw;nlg3jx;nlg3jy;nlg3jz;nlg3ka;nlg3kb;nlg3kc;nlg3kd;nlg3ke;nlg3kf;nlg3kg;nlg3kh;nlg3ki;nlg3kj;nlg3kl;nlg3km;nlg3kn;nlg3ko;nlg3kp;nlg3kq;nlg3kr;nlg3ks;nlg3kt;nlg3ku;nlg3kv;nlg3kw;nlg3kx;nlg3ky;nlg3kz;nlg3la;nlg3lb;nlg3lc;nlg3ld;nlg3le;nlg3lf;nlg3lg;nlg3lh;nlg3li;nlg3lj;nlg3lk;nlg3ll;nlg3lm;nlg3ln;nlg3lo;nlg3lp;nlg3lq;nlg3lr;nlg3ls;nlg3lt;nlg3lu;nlg3lv;nlg3lw;nlg3lx;nlg3ly;nlg3lz;nlg3ma;nlg3mb;nlg3mc;nlg3md;nlg3me;nlg3mf;nlg3mg;nlg3mh;nlg3mi;nlg3mj;nlg3mk;nlg3ml;nlg3mn;nlg3mo;nlg3mp;nlg3mq;nlg3mr;nlg3ms;nlg3mt;nlg3mu;nlg3mv;nlg3mw;nlg3mx;nlg3my;nlg3mz;nlg3na;nlg3nb;nlg3nc;nlg3nd;nlg3ne;nlg3nf;nlg3ng;nlg3nh;nlg3ni;nlg3nj;nlg3nk;nlg3nl;nlg3nm;nlg3no;nlg3np;nlg3nq;nlg3nr;nlg3ns;nlg3nt;nlg3nu;nlg3nv;nlg3nw;nlg3nx;nlg3ny;nlg3nz;nlg3oa;nlg3ob;nlg3oc;nlg3od;nlg3oe;nlg3of;nlg3og;nlg3oh;nlg3oi;nlg3oj;nlg3ok;nlg3ol;nlg3om;nlg3on;nlg3oo;nlg3op;nlg3oq;nlg3or;nlg3os;nlg3ot;nlg3ou;nlg3ov;nlg3ow;nlg3ox;nlg3oy;nlg3oz;nlg3pa;nlg3pb;nlg3pc;nlg3pd;nlg3pe;nlg3pf;nlg3pg;nlg3ph;nlg3pi;nlg3pj;nlg3pk;nlg3pl;nlg3pm;nlg3pn;nlg3po;nlg3pp;nlg3pq;nlg3pr;nlg3ps;nlg3pt;nlg3pu;nlg3pv;nlg3pw;nlg3px;nlg3py;nlg3pz;nlg3qa;nlg3qb;nlg3qc;nlg3qd;nlg3qe;nlg3qf;nlg3qg;nlg3qh;nlg3qi;nlg3qj;nlg3qk;nlg3ql;nlg3qm;nlg3qn;nlg3qo;nlg3qp;nlg3qq;nlg3qr;nlg3qs;nlg3qt;nlg3qu;nlg3qv;nlg3qw;nlg3qx;nlg3qy;nlg3qz;nlg3ra;nlg3rb;nlg3rc;nlg3rd;nlg3re;nlg3rf;nlg3rg;nlg3rh;nlg3ri;nlg3rj;nlg3rk;nlg3rl;nlg3rm;nlg3rn;nlg3ro;nlg3rp;nlg3rq;nlg3rr;nlg3rs;nlg3rt;nlg3ru;nlg3rv;nlg3rw;nlg3rx;nlg3ry;nlg3rz;nlg3sa;nlg3sb;nlg3sc;nlg3sd;nlg3se;nlg3sf;nlg3sg;nlg3sh;nlg3si;nlg3sj;nlg3sk;nlg3sl;nlg3sm;nlg3sn;nlg3so;nlg3sp;nlg3sq;nlg3sr;nlg3ss;nlg3st;nlg3su;nlg3sv;nlg3sw;nlg3sx;nlg3sy;nlg3sz;nlg3ta;nlg3tb;nlg3tc;nlg3td;nlg3te;nlg3tf;nlg3tg;nlg3th;nlg3ti;nlg3tj;nlg3tk;nlg3tl;nlg3tm;nlg3tn;nlg3to;nlg3tp;nlg3tq;nlg3tr;nlg3ts;nlg3tt;nlg3tu;nlg3tv;nlg3tw;nlg3tx;nlg3ty;nlg3tz;nlg3ua;nlg3ub;nlg3uc;nlg3ud;nlg3ue;nlg3uf;nlg3ug;nlg3uh;nlg3ui;nlg3uj;nlg3uk;nlg3ul;nlg3um;nlg3un;nlg3uo;nlg3up;nlg3uq;nlg3ur;nlg3us;nlg3ut;nlg3uu;nlg3uv;nlg3uw;nlg3ux;nlg3uy;nlg3uz;nlg3va;nlg3vb;nlg3vc;nlg3vd;nlg3ve;nlg3vf;nlg3vg;nlg3vh;nlg3vi;nlg3vj;nlg3vk;nlg3vl;nlg3vm;nlg3vn;nlg3vo;nlg3vp;nlg3vq;nlg3vr;nlg3vs;nlg3vt;nlg3vu;nlg3vv;nlg3vw;nlg3vx;nlg3vy;nlg3vz;nlg3wa;nlg3wb;nlg3wc;nlg3wd;nlg3we;nlg3wf;nlg3wg;nlg3wh;nlg3wi;nlg3wj;nlg3wk;nlg3wl;nlg3wm;nlg3wn;nlg3wo;nlg3wp;nlg3wq;nlg3wr;nlg3ws;nlg3wt;nlg3wu;nlg3wv;nlg3ww;nlg3wx;nlg3wy;nlg3wz;nlg3xa;nlg3xb;nlg3xc;nlg3xd;nlg3xe;nlg3xf;nlg3xg;nlg3xh;nlg3xi;nlg3xj;nlg3xk;nlg3xl;nlg3xm;nlg3xn;nlg3xo;nlg3xp;nlg3xq;nlg3xr;nlg3xs;nlg3xt;nlg3xu;nlg3xv;nlg3xw;nlg3xx;nlg3xy;nlg3xz;nlg3ya;nlg3yb;nlg3yc;nlg3yd;nlg3ye;nlg3yf;nlg3yg;nlg3yh;nlg3yi;nlg3yj;nlg3yk;nlg3yl;nlg3ym;nlg3yn;nlg3yo;nlg3yp;nlg3yq;nlg3yr;nlg3ys;nlg3yt;nlg3yu;nlg3yv;nlg3yw;nlg3yx;nlg3yy;nlg3yz;nlg3za;nlg3zb;nlg3zc;nlg3zd;nlg3ze;nlg3zf;nlg3zg;nlg3zh;nlg3zi;nlg3zj;nlg3zk;nlg3zl;nlg3zm;nlg3zn;nlg3zo;nlg3zp;nlg3zq;nlg3zr;nlg3zs;nlg3zt;nlg3zu;nlg3zv;nlg3zw;nlg3zx;nlg3zy;nlg3zz |
| GO:0031175 | neuron projection development      | 443 | 143 | 79.1   | 0.00597 | adcyl1b;adcyp1b;agrn;alcamb;aldoaa;amigo1;anos1a;apc;appb;arl3l1;arl3l2;asah1b;ascl1a;bdnf;bsg;CABZ01118678.1;cad;camsap3;capn1a;casp3a;casp9;clstn1;cnp;cntfr;cntn2;cntn3a.1;col19a1;cxcl12b;cyfip2;dpysl2b;dpysl3;dpysl4;dpysl5a;dscama;e2f8;efna1b;efna2a;epha4b;etv5b;fryb;fus;gpm6ab;gprc5ba;gprc5bb;grip1;grna;hecw2a;jil6st;inab;inpp5jb;isl2a;islr2;kcnc3a;kctd13;kif1b;kif3a;kif5ab;kif5c;lgmn;lingo1a;llph;map1aa;map1ab;map2;map4k4;map4l;maptb;mecp2;ncam1a;ncam1b;nckap1;nefma;nexn;nfasca;nptna;nptnb;nrp1a;nrp2a;nrxn2a;nsfa;nyap2a;nyap2b;olfm1a;pacsin1a;pak1;pcdh18b;plppr4b;pls3;plxna2;ppp1r9a;ppp1r9bb;prmt8b;ptprfa;rab10;rac1a;rb1;rbpms2a;rbpms2b;robo2;robo3;robo4;rtn4a;rtn4r;scn8aa;sema3fa;sema3ga;sema3gb;sema4aa;sema4bb;sema6bb;sema6e;sema7a;shank1;shank2;si:ch1073-450f2.1;si:ch211-113g11.6;si:ch211-129c21.1;si:dkey-16p21.7;slc33a1;slit2;slitrk2;slitrk3a;slitrk3b;slitrk4;slitrk6;srp2;ssh1b;ssh2b;stat3;stmn2a;stmn2b;stmn3;stmn4;stmn4l;tenm3;tmem106bb;tmem59l;tnika;tnr;uba1;vangl2;zfyve27;zgc:77784                                                                                                                                                                                                                                                                                                                                                                                                                                                                                                                                                                                                                                                                                                                                                                                                                                                                                                                                                                                                                                                                                                                                                                                                                                                                                                                                                                                                                                                                                                                                                                                                                                                                                                                                                                                                                                                                                                                                                                                                                                                                                                                                                                                                                                                                                                                                                                                                                                                                                                                                                                                                                                                                                                                                                                                                                                                                                                                                                                                                                                                                                                                                                                                                                                                                                                                                                                                                                                                                                                                                                                                                                                                                                                                                                                                                                                                                                                                                                                                                                                                                                                                                                                                                                                                                                                                                                                                                                                                                                                                                                                                                                                        |
| GO:0007417 | central nervous system development | 519 | 127 | 92.67  | 0.00406 | adcyp1b;adgrg1;agrn;agtpbp1;alcamb;aldh1a2;aldoaa;amigo1;anos1a;apc;appb;ascl1a;ascl1b;asphd1;atp1a1b;atp1a3a;bcl11aa;bcl11ab;bdnf;cad;capn1a;ccsapp;cenpf;chn1;cnnm2b;cntn2;CU639469.1;CU861477.1;cxcl12b;cyp26c1;dpysl2b;drd4a;dync1h1;eif3ha;enpp1;etv5b;ewsr1b;fgf8a;fn1a;gbx2;glra1;h2afy2;hapln1a;her15.1;her6;hgfb;hmgcs1;hsbp1b;igf1rb;igf2b;insm1a;irx7;josd2;jun;katnb1;kcnb1;kcnh1a;kctd13;kirrel3l;gli1b;lzic;map2;marcksa;marcksb;marcksl1a;mdkb;meis3;msi2b;ncam1a;ncanb;nrc3l;nono;nrp1;nsfa;ntrk3a;otud4;paah1b1a;pax6b;pcdh10b;pcdh19b;pebp1;pou4f2;pou4f3;prdm8b;prmt8b;prnpb;psen2;psmd3;ptpro;ptprsa;pycr1b;qars;rbfox1;robo2;rps15a;rps4x;rtn4a;sez6l2;srp5;shank1;shank2;SHC3;si:ch1073-450f2.1;si:ch73-119p20.1;six3a;slc33a1;slc7a7;slc9a3r1a;slit2;smarcka4a;smc1a;sox11a;sox11b;spry4;syngap1b;tacc1;tbx2b;tgif1;thraa;tp1;usp21;usp24;usp28;vangl2;vcana;vw2;yywhag1                                                                                                                                                                                                                                                                                                                                                                                                                                                                                                                                                                                                                                                                                                                                                                                                                                                                                                                                                                                                                                                                                                                                                                                                                                                                                                                                                                                                                                                                                                                                                                                                                                                                                                                                                                                                                                                                                                                                                                                                                                                                                                                                                                                                                                                                                                                                                                                                                                                                                                                                                                                                                                                                                                                                                                                                                                                                                                                                                                                                                                                                                                                                                                                                                                                                                                                                                                                                                                                                                                                                                                                                                                                                                                                                                                                                                                                                                                                                                                                                                                                                                                                                                                                                                                                                                                                                                                                                                                                                                                                                                                                                                                                                                                                                                                                         |

|            |                                           |     |     |       |         |                                                                                                                                                                                                                                                                                                                                                                                                                                                                                                                                                                                                                                                                                                                                                                                                                                                  |
|------------|-------------------------------------------|-----|-----|-------|---------|--------------------------------------------------------------------------------------------------------------------------------------------------------------------------------------------------------------------------------------------------------------------------------------------------------------------------------------------------------------------------------------------------------------------------------------------------------------------------------------------------------------------------------------------------------------------------------------------------------------------------------------------------------------------------------------------------------------------------------------------------------------------------------------------------------------------------------------------------|
| GO:0016477 | cell migration                            | 546 | 119 | 97.49 | 0.02508 | akap12b;alcamb;ankrd6b;anos1a;anxa6;apc;apc2;aplnrb;apoc1;arhgap4b;arrb1;atp1a1b;bcar1;ccr9a;chd7;cmklr1;cntn2;ctnnd1;cxcl12b;cxcl14;cxcr3.3;dmxl2;dpysl3;dscama;efs;esrra;fermt2;fgf8a;fmln3;fn1a;fscn1a;fscn1b;fscn2a;fscn2b;fzd2;fzd7a;git2a;gnb1b;gpc3;grip2a;hgf8b;hsp90ab1;igf1rb;igsf11;ilodr1b;inpp5d;insm1a;isl2a;itgav;itgb3b;itgb7;jagn1a;kcnj13;kita;klf6a;lama5;megf8;meis3;mmp14b;mmp9;mt2;nckap1;nrg1;nrp1a;nrp2a;nsmfa;nsmfb;nusap1;pak1;pik3cb;plekhg5a;plxna2;prcp;ptges;ptpn23a;pum3;rac1a;rac3a;rac3b;rap1b;rc2;rhobtb1;rhoca;rnd1a;rnd1b;robo4;rtn4a;rxfp3.3b;sd2;sd4;sema3fa;sema3ga;sema3gb;sema4aa;sema4bb;sema6bb;sema6e;sema7a;si:ch211-113g11.6;si:ch211-129c21.1;si:ch211-215c18.3;si:dkey-56f14.7;slc24a5;slit2;smarca4a;srpap1a;srpap1b;srpap2;sst6;stat3;tbx2b;thy1;tmie;tmsb;tmsb2;vangl2;zbtt4;zeb2b;zgc:158659 |
| GO:0048812 | neuron projection morphogenesis           | 351 | 115 | 62.67 | 0.01301 | adcy1b;agrn;alcamb;aldoaa;anos1a;apc;apbb;arl3l1;arl3l2;asah1b;bdnf;bsg;cad;capn1a;caspp3a;caspp9;clstn1;cntn2;cntn3a.1;col19a1;cxcl12b;cyfp2;dpysl2b;dpysl3;dpysl4;dpysl5a;dscama;e2f8;efna1b;efna2a;epha4b;etv5b;fus;grna;hecw2a;inab;isl2a;islr2;kcnc3a;kctd13;kif1b;kif3a;kif5ab;kif5c;llph;map1aa;map1ab;map4k4;mecp2;ncam1a;ncam1b;nckap1;nexn;nfasca;nptna;nptnb;nrp1a;nrp2a;nrxn2a;nfsa;nyap2a;nyap2b;olfm1a;pacsin1a;pak1;pcdn18b;plppr4b;pls3;plxna2;prmt8b;ptprfa;rac1a;rb1;rbpms2a;rbpms2b;robo2;robo3;robo4;rtn4a;rtn4r;scn8aa;sema3fa;sema3ga;sema3gb;sema4aa;sema4bb;sema6bb;sema6e;sema7a;shank1;shank2;si:ch1073-450f2.1;si:ch211-113g11.6;si:ch211-129c21.1;si:dkey-16p21.7;slc33a1;slit2;slitrk2;slitrk3a;slitrk3b;slitrk4;slitrk6;srpap2;ssh1b;ssh2b;stat3;tenm3;tmem106bb;tmem59l;tnika;tnr;uba1;vangl2;zfyve27;zgc:77784   |
| GO:0006412 | translation                               | 426 | 113 | 76.06 | 0.0002  | aimp1;ajuba;atp6v0e1;cirbbp;cpeb1a;cpeb3;dald3;disp2;dph6;dre-mir-21-1;dre-mir-21-2;eef1a1b;eef1a1l2;eef1a2;eef1b2;eef1db;eef1g;eef2a.2;eef2b;eif2ak1;eif2ak2;eif2s1a;eif2s1b;eif2s2;eif2s3;eif3ba;eif3f;eif3ha;eif3i;eif3m;eif3s6ip;eif4a1b;eif4ebp1;eif4g1a;eif4g2a;eif5a;eif5a2;eif6;eprs;farsb;faub;fxr1;fxr2;gars;gcn1;gemn5;gtppb1;gtppb2b;hspa14;iars;igf2bp3;lin28a;mov10b.1;nars;nck2a;nhp2;pkz;qars;rars;rpl10a;rpl12;rpl18;rpl21;rpl22;rpl22l1;rpl23;rpl23a;rpl27;rpl29;rpl30;rpl34;rpl35;rpl35a;rpl36a;rpl38;rpl39;rpl4;RPL41;rpl5a;rpl5b;rpl8;rpl9;rps11;rps12;rps13;rps15a;rps17;rps18;rps21;rps23;rps24;rps27.2;rps28;rps29;rps3a;rps4x;rps6kb1b;rps7;rps8a;rps8b;rps9;rpsa;rwdd1;sars;shmt1;tars;tnrc6c2;uba52;ube2e1;upf3a;uqcc2;wars;ybx1                                                                                      |
| GO:0007017 | microtubule-based process                 | 400 | 98  | 71.42 | 0.01987 | apc;apc2;arhgef11;atat1;CABZ01044277.1;CABZ01118678.1;calm1b;calm3a;camsap3;ccdc88b;ccsapb;cenpe;cen2;c;fap206;clasp2;clstn1;CU639469.1;dchs1b;dctn1b;dnah2;DST;dync1h1;dync1i1;dync1i2a;dync1i2b;dync1li2;dync1li2;dync1li2a;dync1li2b;eml1;hook1;inpp5j;ippk;katnb1;kif11;kif1aa;kif1ab;kif1b;kif20a;kif20bb;kif21a;kif3a;kif3ca;kif3cb;kif4;kif5ab;kif5c;lrm;map1aa;map1ab;map2;map4l;map6a;map6b;map6d1;map7a;map7d1a;map7d2b;mapre1b;mapre2;mapre3b;maptb;mark1;mark4a;nusap1;pafah1b1a;pafah1b1b;prc1b;racgap1;rhot1a;si:ch211-114n24.6;si:ch211-235e9.8;si:ch211-257p13.3;si:ch73-199e17.1;spag1a;stmn2a;stmn2b;stmn3;stmn4;stmn4l;tacc1;tuba1a;tuba1b;tuba1c;tuba2;tuba8l;tuba8l3;tuba8l4;tubb2;tubb2b;tubb4b;tubb5;vangl2;vbp1;vcp;zgc:153426;zgc:65894;zgc:86764                                                                       |
| GO:0007409 | axonogenesis                              | 295 | 95  | 52.67 | 0.04257 | adcy1b;agrn;alcamb;aldoaa;anos1a;apc;apbb;arl3l1;arl3l2;asah1b;bsg;capn1a;caspp3a;caspp9;clstn1;cntn2;cntn3a.1;col19a1;cxcl12b;cyfp2;dpysl2b;dpysl3;dpysl5a;dscama;e2f8;efna1b;efna2a;epha4b;etv5b;fus;grna;isl2a;islr2;kcnc3a;kctd13;kif1b;kif3a;kif5ab;kif5c;map1aa;map1ab;mecp2;ncam1a;ncam1b;nexn;nfasca;nptna;nptnb;nrp1a;nrp2a;nrxn2a;nfsa;olfm1a;pak1;plppr4b;pls3;plxna2;ptprfa;rb1;rbpms2a;rbpms2b;robo2;robo3;robo4;rtn4a;rtn4r;scn8aa;sema3fa;sema3ga;sema3gb;sema4aa;sema4bb;sema6bb;sema6e;sema7a;si:ch211-113g11.6;si:ch211-129c21.1;si:dkey-16p21.7;slc33a1;slit2;slitrk2;slitrk3a;slitrk3b;slitrk4;slitrk6;ssh1b;ssh2b;stat3;tenm3;tmem59l;tnr;uba1;vangl2;zfyve27;zgc:77784                                                                                                                                                     |
| GO:0007264 | small GTPase mediated signal transduction | 379 | 93  | 67.67 | 0.00016 | akap12b;arhgap32a;arhgap33;arhgdia;arhgdig;arhgef10b;arhgef11;arhgef2;arhgef33;arhgef4;arhgef9a;arhgef9b;bcrc;cdc28a;cdc42se2;chn1;cyth1a;dock11;dock3;DOCK4 (1 of many);dock6;dock7;dock9b;fgd1;gdi1;grb2a;iqsec3a;iqsec3b;kalrna;kctd13;ksr2;mcf2a;mcf2l2;mcf2la;plekhg5a;prex2;rab10;rab11a;rab15;rab20;rab22a;rab32a;rab33a;rab34a;rab34b;rab39ba;rab3aa;rab3ab;rab41;rab42a;rab43;rab4a;rab6ba;rab6bb;rabif;rabl2;rac1a;rac3a;rac3b;ralba;ralgps1;rap1b;rap1gap;rap1gap2a;rap1gap2b;rapgef1a;rapgef4;rapgef5a;rapgef5b;rapgef1;rasal1b;rasgef1bb;RASGRF1;rgl3a;rhobtb1;rhoca;rhogb;rhot1a;rhousa;rnd1a;rnd1b;robo4;sh2d3ca;si:dkey-38p12.3;sos2;spata13;spry2;spry4;tiam1a;tiam2a;vav3b;zgc:154093;zgc:91909                                                                                                                                |

|            |                                                |     |    |       |         |                                                                                                                                                                                                                                                                                                                                                                                                                                                                                                                                                                                                                                        |
|------------|------------------------------------------------|-----|----|-------|---------|----------------------------------------------------------------------------------------------------------------------------------------------------------------------------------------------------------------------------------------------------------------------------------------------------------------------------------------------------------------------------------------------------------------------------------------------------------------------------------------------------------------------------------------------------------------------------------------------------------------------------------------|
| GO:0007420 | brain development                              | 373 | 88 | 66.6  | 0.00193 | adcyp1b;agtpbp1;alcamb;aldh1a2;aldoaa;amigo1;anos1a;apc;ascl1a;ascl1b;asphd1;atp1a1b;atp1a3a;bcl11aa;bcl11a b;bdnf;capn1a;ccsabb;cenpf;cnm2b;CU639469.1;cxcl12b;cyp26c1;dpysl2b;eif3ha;enpp1;etv5b;fgf8a;fn1a;gbx2;h2af y2;her15.1;her6;hgfb;igf2b;irx7;jun;katnb1;kcnb1;kcnh1a;kcnd13;kirrel3l;lg1b;marcks;marcksb;mdkb;meis3;msi2b; nrg1;nsfa;otud4;pafah1b1a;pax6b;pcdh10b;pcdh19;pebp1;pou4f2;pou4f3;prmt8b;psen2;psmd3;ptpro;ptprsa;pycr1 b;qars;rbfox1;rps15a;rps4x;rtm4a;sez6l2;sfpr5;shank1;shank2;si:ch1073-450f2.1;si:ch73-119p20.1;six3a;slc9a3r1a;sox11a;sox11b;spry4;syngap1b;tacc1;tbx2b;tgif1;thraa;vangl2;vw2c;yywhag1 |
| GO:0023014 | signal transduction by protein phosphorylation | 326 | 67 | 58.21 | 0.03029 | acsl4a;adcyp1b;aida;ankrd6b;bmp3;bmp4;cab39l;cab39l1;cart2;cart3;cds1;CT990561.1;dicp3.1;dicp3.3;dup5e;eph a4b;epha6;ephb1;ephb2a;ephb6;erbb4b;gadd45ba;gadd45ga;igf1rb;ilk;inhbaa;insra;kcnh1a;kcnh3;kcnh4b;kcnh5a;kc nh5b;kita;map2k2b;MAP3K13;map4k4;mapk11;mapk4;mapk9;mstnb;nek12;ntrk3a;ntrk3b;oxsr1a;pak1;pak2b;pebp1 ;prok1;qars;rap1b;sh3rf1;sh3rf2;si:ch1073-184j22.2;si:ch211-191i18.4;si:ch211-195b15.8;si:dkey-17m8.1;slkb;smarca4a;spry2;spry4;taok1b;tgbf2;tgbf3;tnika;trib2;trib3;zak                                                                                                                                  |
| GO:0050804 | modulation of chemical synaptic transmission   | 110 | 59 | 19.64 | 0.01314 | adcyp1b;bdnf;CABZ01081780.1;cacng2a;cacng3b;cacng5a;cacng7b;cacng8b;calb2a;calb2b;clstn1;clstn2;clstn3;cplx 2;cplx2l;cplx3b;cplx4a;cplx4b;grik1a;grik1b;GRIK3;grik4;grin2aa;grin2ab;grm1a;grm1b;grm2a;grm4a;grm6a;grm6b;gr m8a;grm8b;kat2a;napaa;napab;napba;napbb;neto1;nlg1;nlg2a;nlg2b;nlg3a;nptx2a;nsmfa;nsmfb;plcl2;ppp1r9bb ;rims1b;rims2a;rims2b;rims3;shank1;shank2;shisa7b;shisa8b;si:ch1073-450f2.1;syba;sybb;sytl2                                                                                                                                                                                                          |
| GO:0051726 | regulation of cell cycle                       | 519 | 58 | 92.67 | 0.00636 | adcyp1b;anapc15;apc;brinp2;brinp3a.1;bub1bb;cables2b;ccna2;ccnb1;ccng1;ccni;ccnj1;ccsabb;cdk15;cdkn1a; cetn2;chmp4bb;dlg1;dot1;dync1li2;e2f3;e2f8;etv5b;gadd45ba;gadd45ga;hsp90ab1;id4;insm1a;jun;junba;kif11;mdk a;mdm4;pea15;pebp1;pim3;pimr138;ppp1r13ba;prc1b;rab11fip4a;rb1;rpl23a;rpl35;rpl36a;rpl7;rps15a;rps18;rps29; rps7;rps8a;si:ch211-147h1.4;si:dkey-25o16.4;si:dkey-79d12.5;spd1l;ssrp1a;tp53bp1;zwilch                                                                                                                                                                                                                  |
| GO:0006816 | calcium ion transport                          | 169 | 57 | 30.17 | 0.00343 | anxa6;aplnrb;atp2a1;atp2b1a;atp2b2;atp2b3a;atp2b3b;CABZ01081780.1;cacna1aa;cacna1bb;cacna1da;cacna1g;cac na1ha;cacna1hb;cacna1i;cacna2d2a;cacna2d2b;cacna2d4b;cacnb1;cacnb2a;cacnb3a;cacnb3b;cacng2a;cacng3b;cacn g5a;cacng6b;cacng7b;cacng8b;cbarpb;fam155a;gem;homer1b;homer3b;htr2cl1;itpr1a;jph3;mcoln1a;psen2;rem1;rra d;ryr1b;RYR2;ryr3;si:ch211-270g19.5;si:ch73-335m24.5;slc24a3;slc24a4a;slc24a4b;slc24a5;slc8a1b;slc8a2b;slc8a3;slc8a4a;slc8a4b;trpc1;trpc5a;trpv1                                                                                                                                                           |
| GO:0042391 | regulation of membrane potential               | 157 | 56 | 28.03 | 0.00309 | adcyp1b;cacna1g;cacna1ha;cacna1hb;cacna1i;chrna10a;chrna6;chrnb2a;chrnb3a;chrnb3b;gabra1;gabra3;gabra5;ga bra6b;gabbr1;gabbr2;gabbr3;gabbr4;gabbrd;gabrg2;gabbr1;gabbr2a;glra1;glra2;glra3;glra4;glra5;glrb;glrb;grin2aa;grin2a b;grm1a;grm1b;kcna1a;kcna2b;kcna1a;kcna3b;kcna4b;kcna5a;kcna5b;kcna6a;kcna7b;kcna2a.2a;rims1b;rims2 a;rims2b;rims3;scn12aa;scn11bb;scn11ab;scn8aa;scn8ab;shank1;shank2;si:ch1073-450f2.1;si:ch73-380n15.2                                                                                                                                                                                              |
| GO:0007015 | actin filament organization                    | 253 | 55 | 45.17 | 0.03905 | actr3b;add3a;ap1ar;arhgef10b;arhgef11;baiap2a;bcar1;cap2;cap2a1a;ccct5;cff1;dbn1;dlg1;dpysl3;ef3;espnl1a;evla;fml 3;fscn1a;fscn1b;fscn2a;fscn2b;gsna;hip1;lima1a;mical3b;myom2a;pfm2;pls3;ppp1r9a;ppp1r9bb;rac3a;rac3b;rhobtb1; rhoca;rhogb;rhoa;rnd1a;rnd1b;sd4;shroom2a;sorbs1;sorbs2b;sorbs3;spire1b;spire2;ssh1b;ssh2b;tmod2;tmsb;tmsb 2;tpm3;vangl2;vil1;zgc:154093                                                                                                                                                                                                                                                               |
| GO:0070588 | calcium ion transmembrane transport            | 146 | 48 | 26.07 | 0.00014 | anxa6;aplnrb;atp2a1;atp2b1a;atp2b2;atp2b3a;atp2b3b;CABZ01081780.1;cacna1aa;cacna1bb;cacna1da;cacna1g;cac na1ha;cacna1hb;cacna1i;cacna2d2a;cacna2d2b;cacna2d4b;cacnb1;cacnb2a;cacnb3a;cacnb3b;cacng2a;cacng3b;cacn g5a;cacng6b;cacng7b;cacng8b;cbarpb;fam155a;gem;htr2cl1;itpr1a;jph3;mcoln1a;rem1;rrad;ryr1b;RYR2;ryr3;si:ch73-335m24.5;slc24a3;slc24a4a;slc24a4b;slc24a5;trpc1;trpc5a;trpv1                                                                                                                                                                                                                                           |
| GO:0007269 | neurotransmitter secretion                     | 71  | 41 | 12.68 | 0.01159 | cadpsb;cplx2;cplx3b;cplx4a;cplx4b;lin7a;napaa;napab;napba;napbb;otofa;pdzd11;ppfia3;rims1b;rims2a;rims2 b;rims3;snap25a;snap25b;stx11a;stx11b.2;stx2a;stx4;syn1;syn2a;sytl10;sytl11b;sytl12;sytl13;sytl1a;sytl2a;sytl3;sytl5 a;sytl5b;sytl6a;sytl6b;sytl7b;sytl9a;sytl9b                                                                                                                                                                                                                                                                                                                                                               |
| GO:0035335 | peptidyl-tyrosine dephosphorylation            | 112 | 31 | 20    | 0.00656 | ca16b;cdc14ab;dup23b;DUSP26;dup3a;dup5;mtmr7a;mtmr7b;ptenb;ptp4a1;ptp4a2b;ptp4a3;ptpdc1b;ptpmt1;pt pn11b;ptpn21;ptpn23a;ptpn4b;ptprdb;ptprfa;ptprnb;ptpro;ptprsa;ptprt;ptprz1b;si:ch1073-184j22.2;si:ch211-195b15.8;ssh1b;ssh2b;tpte;zgc:77752                                                                                                                                                                                                                                                                                                                                                                                         |
| GO:0007018 | microtubule-based movement                     | 156 | 31 | 27.85 | 0.01777 | arhgef11;ccsabb;cenpe;cfap206;clstn1;dcnt1b;dnah2;dync1h1;dync1i1;dync1i2a;dync1i2b;dync1li2;ippk;kif11;kif1a a;kif1ab;kif1b;kif20a;kif20b;kif21a;kif3a;kif3ca;kif3cb;kif4;kif5ab;kif5c;pafah1b1a;pafah1b1b;rho1a;si:ch211-235e9.8;si:ch211-257p13.3                                                                                                                                                                                                                                                                                                                                                                                   |
| GO:0003143 | embryonic heart tube morphogenesis             | 113 | 30 | 20.18 | 0.04242 | apc;atp1a1b;atp6ap1b;atp6v1f;bbs4;bbs5;bmp4;bmpr2a;bnip31b;cacnb2a;camk2a;camk2g1;cenpf;chd7;fabp3;fn1a;f zd2;gpr22a;mef2cb;ndrg4;pak1;pkp2;scn12aa;skia;skib;slc8a4a;smarca4a;tbx2b;tbx5b;trib3                                                                                                                                                                                                                                                                                                                                                                                                                                       |
| GO:0035249 | synaptic transmission, glutamatergic           | 50  | 29 | 8.93  | 0.0001  | adcyp1b;cacng2a;cacng3b;cacng5a;cacng7b;cacng8b;grik1a;grik1b;GRIK3;grik4;grm1a;grm1b;grm2a;grm4a;grm6a;gr m6b;grm8a;grm8b;napaa;napab;napba;napbb;nptx2a;shank1;shank2;si:ch1073-450f2.1;slc17a6b;slc17a7a;slc17a7b                                                                                                                                                                                                                                                                                                                                                                                                                   |

|            |                                                              |     |    |       |         |                                                                                                                                                                                                                                    |
|------------|--------------------------------------------------------------|-----|----|-------|---------|------------------------------------------------------------------------------------------------------------------------------------------------------------------------------------------------------------------------------------|
| GO:0051480 | regulation of cytosolic calcium ion concentration            | 166 | 28 | 29.64 | 0.00462 | adcyap1b;aplnrb;atp2b1a;atp2b2;atp2b3a;atp2b3b;calb2a;calb2b;ccr9a;cmklr1;cxcr3.3;fam155a;grm1b;htr2cl1;jph3;mccln1a;pvalb2;pvalb3;pvalb6;pvalb9;rxfp3.3b;ryr1b;RYR2;ryr3;slc8a4a;trpc1;trpc5a                                     |
| GO:0007626 | locomotory behavior                                          | 85  | 28 | 15.18 | 0.01321 | abhd12;adgrl3.1;atp1a3a;bag3;chata;fhl1a;flnca;flncb;gdpd5a;gprc5ba;gprc5bb;htr2cl1;mecp2;nr1d1;pleca;psmd3;ryr1b;scn1lab;scn8aa;slc12a2;slc12a2b;snap25a;snap25b;snbc;snrgb;syngap1b;tppl1;vcp                                    |
| GO:0050770 | regulation of axonogenesis                                   | 90  | 27 | 16.07 | 0.04238 | arl3l1;arl3l2;caspp3a;caspp9;clstn1;cntn2;dpysl2b;epha4b;pak1;plxna2;rbpms2a;rbpms2b;robo2;sema3fa;sema3ga;sema3gb;sema4aa;sema4bb;sema6bb;sema6e;sema7a;si:ch211-113g11.6;si:ch211-129c21.1;slit2;ssh1b;ssh2b;zfye27              |
| GO:1902476 | chloride transmembrane transport                             | 69  | 24 | 12.32 | 0.00057 | best2;clcn7;cllc4;cllc5a;gabra1;gabra3;gabra5;gabra6b;gabrg2;glra1;glra2;glra3;glra4b;glrba;glrb;slc12a2;slc12a4;slc12a5a;slc12a5b;slc12a7a;slc12a9;ttyh1;ttyh2l;ttyh3b                                                            |
| GO:0050806 | positive regulation of synaptic transmission                 | 42  | 22 | 7.5   | 0.00014 | adcyap1b;CABZ01081780.1;cacng2a;cacng3b;cacng5a;cacng7b;cacng8b;calb2a;calb2b;clstn1;clstn2;clstn3;grin2aa;grin2ab;rims1b;rims2a;rims2b;rims3;shank1;shank2;si:ch1073-450f2.1;syt12                                                |
| GO:0060078 | regulation of postsynaptic membrane potential                | 66  | 22 | 11.78 | 0.00055 | adcyap1b;chrna10a;chrna6;chrnb2a;chrnb3a;chrnb3b;gabra1;gabra3;gabra5;gabra6b;gabrg2;glra1;glrba;glrb;grin2aa;grin2ab;grm1a;grm1b;shank1;shank2;si:ch1073-450f2.1;si:ch73-380n15.2                                                 |
| GO:0007623 | circadian rhythm                                             | 64  | 22 | 11.43 | 0.01789 | arntl1a;arntl2;ciarta;ciartb;cipca;clocka;htr7c;id4;impdh2;mitfa;nfil3;nfil3-5;npas2;npv;nr1d1;nr1d4b;otx5;per1a;per3;prok1;scn1lab;si:ch211-132b12.7                                                                              |
| GO:0048167 | regulation of synaptic plasticity                            | 38  | 21 | 6.78  | 0.00617 | CABZ01081780.1;calb2a;calb2b;grin2aa;grin2ab;kat2a;neto1;nsmf;nsmf;rim1b;rims2a;rims2b;rims3;shank1;shank2;shisa7b;shisa8b;si:ch1073-450f2.1;sypa;sypb;syt12                                                                       |
| GO:0042176 | regulation of protein catabolic process                      | 81  | 21 | 14.46 | 0.03176 | ankib1a;apc2;csnk1e;gpc3;hecw2a;hsp90ab1;itcha;oaz2b;psmc1a;psmc1b;psmd1;psmd3;RNF14 (1 of many);stub1;timp2b;timp4.3;trib2;trib3;uqc2;vcp;vip                                                                                     |
| GO:0045666 | positive regulation of neuron differentiation                | 62  | 21 | 11.07 | 0.03898 | adcyap1b;ascl1a;ascl1b;brinp2;brinp3a.1;cntfr;cntn2;gprc5ba;gprc5bb;il6st;llph;mdkb;pacsin1a;plxna2;shank1;shank2;si:ch1073-450f2.1;si:ch211-194k22.8;tcf12;tenm3;zfye27                                                           |
| GO:0002181 | cytoplasmic translation                                      | 59  | 20 | 10.53 | 0.00381 | atp6v0e1;cpeb1a;cpeb3;dph6;eif2s3;eif3ba;eif3ha;eif3i;eif3m;eif3s6ip;hspa14;iin28a;rpl29;rpl35a;rpl8;rpl9;rps21;rps28;rwdd1;ube2e1                                                                                                 |
| GO:0045765 | regulation of angiogenesis                                   | 73  | 20 | 13.03 | 0.03705 | adgrb1a;adgrb3;aplnrb;dab2ipa;dab2ipb;iars;jcada;mt2;nme2b.1;prkd1;prok1;ptenb;sars;sox11b;tars;tmem184a;unc5b;VASH1;vash2;yjefn3                                                                                                  |
| GO:0042074 | cell migration involved in gastrulation                      | 70  | 19 | 12.5  | 0.02761 | ankrd6b;apoc1;ctnnd1;cxcl12b;dscama;esra;fzd7a;git2a;gpc3;itgav;megf8;mmp14b;ptges;rac1a;stat3;tbx2b;vangl2;zbtb4;zeb2b                                                                                                            |
| GO:0031018 | endocrine pancreas development                               | 61  | 19 | 10.89 | 0.03783 | adamts9;apc;ascl1b;c2cd4a;fscn1a;fzd2;gck;insm1a;insm1b;irx3a;kcnip3b;kcj11;lepr;pax6b;sept15;slc30a8;sox4b;srbf1;zgc:153115                                                                                                       |
| GO:0043065 | positive regulation of apoptotic process                     | 70  | 19 | 12.5  | 0.04987 | apc;baxa;baxb;bbc3;bmf2;bnip3lb;bnip4;caspp3a;caspp9;dab2ipa;dab2ipb;esco2;fas;hdr;hip1;kctd13;melk;osgn1;ppifb;aldh1a2;chd4a;col1a1a;ctsba;cx43;esco2;hapln1a;hspd1;igf1rb;igf2b;inhbaa;kdm6bb;krt5;mmp9;ng1;smarca4a;tubb5;vdac3 |
| GO:0031101 | fin regeneration                                             | 59  | 18 | 10.53 | 0.01234 | add3a;arhgef10b;arhgef11;baiap2a;dpysl3;espnla;fscn1a;fscn1b;fscn2a;fscn2b;lima1a;pfm2;pls3;rhoca;rnd1a;rnd1b;sdcd4                                                                                                                |
| GO:0051017 | actin filament bundle assembly                               | 55  | 17 | 9.82  | 0.00536 | cacna1g;cacna1ha;cacna1hb;cacna1i;cacng2a;cacng3b;cacng5a;cacng7b;cacng8b;kcna1a;kcna1b;nfasca;scn12aa;scn1lab;scn8aa;scn8ab                                                                                                       |
| GO:0019226 | transmission of nerve impulse                                | 24  | 16 | 4.29  | 0.01099 | cacna1g;cacna1ha;cacna1hb;cacna1i;napaa;napab;napba;napbb;rims1b;rims2a;rims2b;rims3;scamp5a;syt10;syt9a;syt9b                                                                                                                     |
| GO:0017158 | regulation of calcium ion-dependent exocytosis               | 21  | 16 | 3.75  | 0.01951 | cacna1g;cacna1ha;cacna1hb;cacna1i;napaa;napab;napba;napbb;rims1b;rims2a;rims2b;rims3;scamp5a;syt10;syt9a;syt9b                                                                                                                     |
| GO:0009636 | response to toxic substance                                  | 63  | 16 | 11.25 | 0.02054 | abcb4;alox5ap;blmh;cat;eif2ak2;esd;fam213b;gpx3;gpx4b;gstk1;loxhd1a;pebp1;pkz;prdx1;sod1;sod2                                                                                                                                      |
| GO:0030705 | cytoskeleton-dependent intracellular transport               | 56  | 15 | 10    | 0.00097 | ccdc88b;clstn1;dctn1b;hook1;kif1aa;kif1ab;kif1b;kif3a;kif5ab;kif5c;map6a;map6b;pafah1b1a;rhota1a;si:ch211-235e9.8                                                                                                                  |
| GO:0071526 | semaphorin-plexin signaling pathway                          | 47  | 15 | 8.39  | 0.00323 | nrp1a;nrp2a;plxna2;plxna3;plxna4;sema3fa;sema3ga;sema3gb;sema4aa;sema4bb;sema6bb;sema6e;sema7a;si:ch211-113g11.6;si:ch211-129c21.1                                                                                                 |
| GO:0070121 | Kupffer's vesicle development                                | 52  | 15 | 9.28  | 0.03473 | atp6ap1b;atp6v1f;bbs4;bbs5;cx43;fgf8a;gpr22a;inpp5b;itgav;nkd3;rab11a;rab3ip;sdct1;unc119b                                                                                                                                         |
| GO:0009266 | response to temperature stimulus                             | 52  | 15 | 9.28  | 0.04259 | bhlhe41;cirrbp;clocka;cry1ba;cry2;dnaja2l;hsf2;hsp70.1;hsp70l;hspa14;hspb1;pebp1;trpm3;trpv1;ucp3                                                                                                                                  |
| GO:0031110 | regulation of microtubule polymerization or depolymerization | 31  | 14 | 5.54  | 0.00032 | apc;apc2;CABZ01118678.1;camsap3;clasp2;inpp5jb;mapre1b;mapre2;mapre3b;stmn2a;stmn2b;stmn3;stmn4;stmn4l                                                                                                                             |
| GO:0046928 | regulation of neurotransmitter secretion                     | 20  | 14 | 3.57  | 0.00346 | cplx2;cplx2l;cplx3b;cplx4a;cplx4b;napaa;napab;napba;napbb;rims1b;rims2a;rims2b;rims3;syt12                                                                                                                                         |
| GO:0006096 | glycolytic process                                           | 35  | 14 | 6.25  | 0.01863 | aldoaa;aldoca;aldocb;eno1a;eno2;gck;pfklb;pfkmb;pfkpb;pgam1a;pkma;scn1lab;tpi1a;tpi1b                                                                                                                                              |
| GO:0060216 | definitive hemopoiesis                                       | 48  | 14 | 8.57  | 0.03709 | angptl1a;angptl2b;camk4;cbi;dkc1;hdac6;hsp70l;mbd3b;pbx1a;rpl22l1;rps24;sae1;scml4;tfec                                                                                                                                            |
| GO:0046854 | phosphatidylinositol phosphorylation                         | 48  | 14 | 8.57  | 0.03709 | cish;impa1;impa2;pi4k2a;pi4kaa;pi3k3b;pi3k3r1;pi3k3r3a;pi3k3r3b;pip4k2ab;pip5k1cb;pip5k1l;socs2;zgc:158659                                                                                                                         |
| GO:0006414 | translational elongation                                     | 42  | 13 | 7.5   | 0.03805 | dph6;eef1a1b;eef1a1l2;eef1a2;eef1b2;eef1db;eef1g;eef2a.2;eef2b;eif5a;eif5a2;gtppb1;gtppb2b                                                                                                                                         |

|            |                                                                             |    |    |       |         |                                                                                                          |
|------------|-----------------------------------------------------------------------------|----|----|-------|---------|----------------------------------------------------------------------------------------------------------|
| GO:0015991 | ATP hydrolysis coupled proton transport                                     | 35 | 12 | 6.25  | 0.01482 | atp1a1b;atp1a3a;atp6ap1b;atp6ap1a;atp6v0a1b;atp6v0a2a;atp6v0e1;atp6v1ba;atp6v1f;atp6v1h;atp6v0e2;tcirg1b |
| GO:0048048 | embryonic eye morphogenesis                                                 | 36 | 12 | 6.43  | 0.02238 | cct3;hs6st2;mfap2;plxna2;sfrp1a;sfrp5;smarca4a;sox11a;sox11b;sox4a;sox4b;vangl2                          |
| GO:0055075 | potassium ion homeostasis                                                   | 28 | 12 | 5     | 0.03705 | atp1a1b;atp1a3a;atp1b1b;atp1b2a;atp1b3a;atp1b3b;slc12a2;slc12a4;slc12a5a;slc12a5b;slc12a7a;slc12a9       |
| GO:0033334 | fin morphogenesis                                                           | 51 | 12 | 9.11  | 0.03729 | apc;bmp4;col1a1a;cx43;fras1;frem1a;frem2a;grip2a;lama5;mmp9;pi4kaa;tll1                                  |
| GO:0048791 | calcium ion-regulated exocytosis of neurotransmitter                        | 19 | 11 | 3.39  | 0.00011 | rims1b;rims2a;rims2b;rims3;syt11b;syt1a;syt2a;syt4;syt5a;syt5b;syt7b                                     |
| GO:0048488 | synaptic vesicle endocytosis                                                | 21 | 11 | 3.75  | 0.00032 | dnm1b;dnm3a;nlg1n;nlg2a;nlg3a;si:ch211-233a24.2;syt1a;syt2a;syt5a;syt5b                                  |
| GO:0007019 | microtubule depolymerization                                                | 23 | 11 | 4.11  | 0.01108 | apc;apc2;CABZ01118678.1;camsap3;ccsapb;katnb1;stmn2a;stmn2b;stmn3;stmn4;stmn4l                           |
| GO:0048843 | negative regulation of axon extension involved in axon guidance             | 31 | 11 | 5.54  | 0.01472 | robo2;sema3fa;sema3ga;sema3gb;sema4aa;sema4bb;sema6bb;sema6e;sema7a;si:ch211-113g11.6;si:ch211-129c21.1  |
| GO:0048013 | ephrin receptor signaling pathway                                           | 33 | 11 | 5.89  | 0.03808 | CT990561.1;efna1b;efna2a;efna3a;ek1;epha4b;epha6;ephb1;ephb2a;ephb6;si:dkeyp-9d4.3                       |
| GO:0008286 | insulin receptor signaling pathway                                          | 36 | 11 | 6.43  | 0.03981 | cish;enpp1;foxo3a;igf1rb;insra;irs2a;pi3k1r;pi3k3a;pi3k3b;si:ch211-284e13.4;socs2                        |
| GO:0097120 | receptor localization to synapse                                            | 22 | 11 | 3.93  | 0.04254 | cacng2a;cacng3b;cacng5a;cacng7b;cacng8b;dlg1;dlg3;dlg4;gphnb;kif5ab;kif5c                                |
| GO:2000311 | regulation of AMPA receptor activity                                        | 19 | 10 | 3.39  | 0.00062 | cacng2a;cacng3b;cacng5a;cacng7b;cacng8b;shank1;shank2;shisa7b;shisa8b;si:ch1073-450f2.1                  |
| GO:0050919 | negative chemotaxis                                                         | 30 | 10 | 5.36  | 0.03058 | sema3fa;sema3ga;sema3gb;sema4aa;sema4bb;sema6bb;sema6e;sema7a;si:ch211-113g11.6;si:ch211-129c21.1        |
| GO:0051968 | positive regulation of synaptic transmission, glutamatergic                 | 18 | 9  | 3.21  | 0.00187 | adcyap1b;cacng2a;cacng3b;cacng5a;cacng7b;cacng8b;shank1;shank2;si:ch1073-450f2.1                         |
| GO:0048813 | dendrite morphogenesis                                                      | 23 | 9  | 4.11  | 0.01117 | hecw2a;prmt8b;rbpms2a;rbpms2b;shank1;shank2;si:ch1073-450f2.1;tenm3;tmem106bb                            |
| GO:0060291 | long-term synaptic potentiation                                             | 20 | 9  | 3.57  | 0.01457 | CABZ01081780.1;calb2a;calb2b;grin2aa;grin2ab;shank1;shank2;si:ch1073-450f2.1;syt12                       |
| GO:0044772 | mitotic cell cycle phase transition                                         | 83 | 9  | 14.82 | 0.03204 | anapc15;bub1bb;cdk1;chmp4bb;clasp2;ensaa;lzts1;rb1;spdl1                                                 |
| GO:0031103 | axon regeneration                                                           | 22 | 9  | 3.93  | 0.03219 | ascl1a;cnp;cntfr;cntn2;dpysl2b;epha4b;il6st;lgmn;lingo1a                                                 |
| GO:0070593 | dendrite self-avoidance                                                     | 13 | 8  | 2.32  | 0.00056 | bsg;cntn3a.1;dscama;nexn;nptna;nptnb;robo3;robo4                                                         |
| GO:0032922 | circadian regulation of gene expression                                     | 13 | 8  | 2.32  | 0.00056 | ciarta;ciartb;clocka;nfil3-5;nr1d1;otx5;per1a;per3                                                       |
| GO:0000470 | maturation of LSU-rRNA                                                      | 18 | 8  | 3.21  | 0.00626 | ftsj3;las1l;nhp2;rpl10a;rpl35;rpl7;rsl1d1;snu13b                                                         |
| GO:2000300 | regulation of synaptic vesicle exocytosis                                   | 10 | 8  | 1.79  | 0.01115 | napaa;napab;napba;napbb;rims1b;rims2a;rims2b;rims3                                                       |
| GO:0043200 | response to amino acid                                                      | 24 | 8  | 4.29  | 0.01204 | glra1;glra2;glra3;glra4b;glrba;glrbb;rragca;sen2                                                         |
| GO:0006171 | cAMP biosynthetic process                                                   | 26 | 8  | 4.64  | 0.01761 | adcy1b;adcy2a;adcy3a;adcy6a;adcy7;cap2;rxfp2a;si:dkey-206f10.1                                           |
| GO:0006817 | phosphate ion transport                                                     | 17 | 8  | 3.04  | 0.0318  | ankha;slc17a7a;slc17a7b;slc20a1a;slc20a1b;slc20a2;slc25a14;slc34a2a                                      |
| GO:1901385 | regulation of voltage-gated calcium channel activity                        | 12 | 8  | 2.14  | 0.03849 | cacnb1;cacnb2a;cacnb3a;cacnb3b;cbarpb;gem;rem1;rrad                                                      |
| GO:0006884 | cell volume homeostasis                                                     | 23 | 8  | 4.11  | 0.03986 | lrrc8aa;lrrc8c;slc12a2;slc12a4;slc12a5a;slc12a5b;slc12a7a;slc12a9                                        |
| GO:0046847 | filopodium assembly                                                         | 13 | 7  | 2.32  | 0.00092 | arhgef9b;dpysl3;fnnl3;gpm6ab;robo4;srgap2;trpc1                                                          |
| GO:0007157 | heterophilic cell-cell adhesion via plasma membrane cell adhesion molecules | 12 | 7  | 2.14  | 0.00196 | igsf21a;igsf21b;pvrl2;si:ch73-22o12.1;tenm1;TENM2;tenm3                                                  |
| GO:0048168 | regulation of neuronal synaptic plasticity                                  | 10 | 7  | 1.79  | 0.00275 | neto1;nsmfa;nsmfb;shisa7b;shisa8b;sypa;sypb                                                              |
| GO:0045879 | negative regulation of smoothed signaling pathway                           | 14 | 7  | 2.5   | 0.0061  | cdon;gatad2b;gpc3;sox11a;sox11b;sox4a;sox4b                                                              |
| GO:0009648 | photoperiodism                                                              | 15 | 7  | 2.68  | 0.00626 | arntl1a;arntl1b;arntl2;clocka;npsa2;per1a;per3                                                           |
| GO:0070654 | sensory epithelium regeneration                                             | 15 | 7  | 2.68  | 0.00969 | apobec2b;ascl1a;fzd2;hbegfa;insm1a;mdka;tgif1                                                            |
| GO:1903670 | regulation of sprouting angiogenesis                                        | 22 | 7  | 3.93  | 0.01969 | apl1rb;jars;jcada;mt2;sars;sox11b;tars                                                                   |
| GO:0043113 | receptor clustering                                                         | 14 | 7  | 2.5   | 0.02054 | agrn;dlg1;dlg3;dlg4a;gphnb;grna;slc9a3r1a                                                                |
| GO:0055064 | chloride ion homeostasis                                                    | 17 | 7  | 3.04  | 0.02107 | calca;slc12a2;slc12a4;slc12a5a;slc12a5b;slc12a7a;slc12a9                                                 |
| GO:0046686 | response to cadmium ion                                                     | 17 | 7  | 3.04  | 0.02107 | baxa;gadd45ba;hsp70.1;hsp70l;jun;mt2;sod2                                                                |
| GO:0099590 | neurotransmitter receptor internalization                                   | 17 | 7  | 3.04  | 0.03224 | cacng2a;cacng3b;cacng5a;cacng7b;cacng8b;dnm1b;dnm3a                                                      |
| GO:0000027 | ribosomal large subunit assembly                                            | 19 | 7  | 3.39  | 0.0394  | mrt04;nop53;ppan;rpl12;rpl23a;rpl5a;rpl5b                                                                |
| GO:0051932 | synaptic transmission, GABAergic                                            | 10 | 6  | 1.79  | 0.00092 | gabra1;gabra3;gabra5;gabra6b;gabrg2;plcl2                                                                |
| GO:0060012 | synaptic transmission, glycinergic                                          | 9  | 6  | 1.61  | 0.00165 | glra1;glra2;glra3;glra4b;glrba;glrbb                                                                     |
| GO:0051597 | response to methylmercury                                                   | 10 | 6  | 1.79  | 0.0035  | baxa;gadd45ba;jun;mt2;sod1;sod2                                                                          |
| GO:0030032 | lamellipodium assembly                                                      | 16 | 6  | 2.86  | 0.0112  | ablim1b;ablim3;dmtn;robo4;ssh1b;ssh2b                                                                    |
| GO:0061386 | closure of optic fissure                                                    | 13 | 6  | 2.32  | 0.0176  | sfrp1a;sfrp5;sox11a;sox11b;sox4a;sox4b                                                                   |
| GO:0008345 | larval locomotory behavior                                                  | 13 | 6  | 2.32  | 0.0176  | psmd3;ryr1b;scn8aa;slc1a2b;snbc;snccb                                                                    |

|            |                                                                                           |    |   |      |         |                                                 |
|------------|-------------------------------------------------------------------------------------------|----|---|------|---------|-------------------------------------------------|
| GO:0036376 | sodium ion export across plasma membrane                                                  | 13 | 6 | 2.32 | 0.0176  | atp1a1b;atp1a3a;atp1b1b;atp1b2a;atp1b3a;atp1b3b |
| GO:0030007 | cellular potassium ion homeostasis                                                        | 13 | 6 | 2.32 | 0.0176  | atp1a1b;atp1a3a;atp1b1b;atp1b2a;atp1b3a;atp1b3b |
| GO:0098970 | postsynaptic neurotransmitter receptor diffusion trapping                                 | 13 | 6 | 2.32 | 0.0176  | cacng2a;cacng3b;cacng5a;cacng7b;cacng8b;gphnb   |
| GO:0043280 | positive regulation of cysteine-type endopeptidase activity involved in apoptotic process | 24 | 6 | 4.29 | 0.02063 | baxa;baxb;bbc3;esco2;hdr;hip1                   |
| GO:0006883 | cellular sodium ion homeostasis                                                           | 14 | 6 | 2.5  | 0.02623 | atp1a1b;atp1a3a;atp1b1b;atp1b2a;atp1b3a;atp1b3b |
| GO:0099054 | presynapse assembly                                                                       | 9  | 6 | 1.61 | 0.03181 | bdnf;mecp2;nlg1;nlg2a;nlg2b;nlg3a               |
| GO:0007196 | adenylate cyclase-inhibiting G-protein coupled glutamate receptor signaling pathway       | 5  | 5 | 0.89 | 0.00018 | grm4;grm6a;grm6b;grm8a;grm8b                    |
| GO:0045956 | positive regulation of calcium ion-dependent exocytosis                                   | 7  | 5 | 1.25 | 0.00276 | cacna1g;cacna1ha;cacna1hb;cacna1i;scamp5a       |
| GO:0098700 | neurotransmitter loading into synaptic vesicle                                            | 7  | 5 | 1.25 | 0.00435 | slc17a6b;slc17a7a;slc17a7b;slc18a2;slc32a1      |
| GO:0042984 | regulation of amyloid precursor protein biosynthetic process                              | 7  | 5 | 1.25 | 0.00568 | itm2ca;itm2cb;necab1;necab2;necab3              |
| GO:0002138 | retinoic acid biosynthetic process                                                        | 8  | 5 | 1.43 | 0.00568 | apc;hmx4;rpb1;rdh10a;rdh10b                     |
| GO:0000160 | phosphorelay signal transduction system                                                   | 8  | 5 | 1.43 | 0.00627 | kcnh1a;kcnh3;kcnh4b;kcnh5a;kcnh5b               |
| GO:0031023 | microtubule organizing center organization                                                | 48 | 5 | 8.57 | 0.03199 | calm1b;calm3a;cetn2;clasp2;pafah1b1a            |
| GO:0030878 | thyroid gland development                                                                 | 11 | 5 | 1.96 | 0.03228 | bcl2l1;fgf8a;thraa;thrab;thrb                   |
| GO:0034625 | fatty acid elongation, monounsaturated fatty acid                                         | 12 | 5 | 2.14 | 0.04738 | elov1a;elov1b;elov4b;elov6;elov8a               |
| GO:0034626 | fatty acid elongation, polyunsaturated fatty acid                                         | 12 | 5 | 2.14 | 0.04738 | elov1a;elov1b;elov4b;elov6;elov8a               |
| GO:0046855 | inositol phosphate dephosphorylation                                                      | 12 | 5 | 2.14 | 0.04738 | impa1;impa2;inpp5b;inpp5jb;ptenb                |
| GO:0019367 | fatty acid elongation, saturated fatty acid                                               | 12 | 5 | 2.14 | 0.04738 | elov1a;elov1b;elov4b;elov6;elov8a               |
| GO:0098943 | neurotransmitter receptor transport, postsynaptic endosome to lysosome                    | 12 | 5 | 2.14 | 0.04738 | cacng2a;cacng3b;cacng5a;cacng7b;cacng8b         |
| GO:0010807 | regulation of synaptic vesicle priming                                                    | 4  | 4 | 0.71 | 0.00101 | napaa;napab;napba;napbb                         |
| GO:0035494 | SNARE complex disassembly                                                                 | 4  | 4 | 0.71 | 0.00101 | napaa;napab;napba;napbb                         |
| GO:0045162 | clustering of voltage-gated sodium channels                                               | 6  | 4 | 1.07 | 0.0112  | glnd;ndrg4;nsfa;snap25b                         |
| GO:0021634 | optic nerve formation                                                                     | 6  | 4 | 1.07 | 0.0112  | klf6a;klf7b;smarca4a;tuba1a                     |
| GO:0006177 | GMP biosynthetic process                                                                  | 8  | 4 | 1.43 | 0.0197  | gmps;hprt1;impdh1b;impdh2                       |
| GO:0007158 | neuron cell-cell adhesion                                                                 | 7  | 4 | 1.25 | 0.02245 | nlg1;nlg2a;nlg2b;nlg3a                          |
| GO:0097104 | postsynaptic membrane assembly                                                            | 7  | 4 | 1.25 | 0.02245 | nlg1;nlg2a;nlg2b;nlg3a                          |
| GO:0097105 | presynaptic membrane assembly                                                             | 7  | 4 | 1.25 | 0.02245 | nlg1;nlg2a;nlg2b;nlg3a                          |
| GO:0021772 | olfactory bulb development                                                                | 7  | 4 | 1.25 | 0.02245 | anos1a;enpp1;msi2b;ptprsa                       |
| GO:0051965 | positive regulation of synapse assembly                                                   | 7  | 4 | 1.25 | 0.02245 | clstn1;clstn2;clstn3;lrcc4bb                    |
| GO:0046548 | retinal rod cell development                                                              | 7  | 4 | 1.25 | 0.02245 | rpgr1p1;sox11a;sox11b;tbx2b                     |
| GO:0003208 | cardiac ventricle morphogenesis                                                           | 9  | 4 | 1.61 | 0.03185 | fgf8a;fhl1a;ilk;nrg1                            |
| GO:0007026 | negative regulation of microtubule depolymerization                                       | 8  | 4 | 1.43 | 0.03864 | apc;apc2;CABZ01118678.1;camsap3                 |
| GO:0060999 | positive regulation of dendritic spine development                                        | 8  | 4 | 1.43 | 0.03864 | llph;shank1;shank2;si:ch1073-450f2.1            |
| GO:0043652 | engulfment of apoptotic cell                                                              | 8  | 4 | 1.43 | 0.03864 | havcr1;rac3a;rac3b;rhobtb1                      |
| GO:0006855 | drug transmembrane transport                                                              | 8  | 4 | 1.43 | 0.03864 | abcg2c;abcg2d;slc18a2;slc18a3a                  |
| GO:0051591 | response to cAMP                                                                          | 9  | 4 | 1.61 | 0.04273 | enpp1;jun;junba;pebp1                           |
| GO:0070884 | regulation of calcineurin-NFAT signaling cascade                                          | 3  | 3 | 0.54 | 0.00569 | rca1a;rca2;rca3                                 |
| GO:0060509 | Type I pneumocyte differentiation                                                         | 3  | 3 | 0.54 | 0.00569 | thraa;thrab;thrb                                |
| GO:1901842 | negative regulation of high voltage-gated calcium channel activity                        | 3  | 3 | 0.54 | 0.00569 | gem;rem1;rrad                                   |
| GO:0010996 | response to auditory stimulus                                                             | 4  | 3 | 0.71 | 0.0197  | kcnma1a;otofa;wrb                               |
| GO:0036368 | cone photoreceptor recovery                                                               | 4  | 3 | 0.71 | 0.0197  | eml1;rcvrn3;rcvrna                              |
| GO:0035385 | Roundabout signaling pathway                                                              | 4  | 3 | 0.71 | 0.0197  | robo2;robo3;zgc:77784                           |
| GO:0016199 | axon midline choice point recognition                                                     | 4  | 3 | 0.71 | 0.0197  | adcy1b;robo2;robo3                              |

|            |                                                                                                                                                     |   |   |      |         |                                 |
|------------|-----------------------------------------------------------------------------------------------------------------------------------------------------|---|---|------|---------|---------------------------------|
| GO:0000447 | endonucleolytic cleavage in ITS1 to separate SSU-rRNA from 5.8S rRNA and LSU-rRNA from tricistronic rRNA transcript (SSU-rRNA, 5.8S rRNA, LSU-rRNA) | 4 | 3 | 0.71 | 0.0197  | abt1;rps21;rpsa                 |
| GO:0019388 | galactose catabolic process                                                                                                                         | 6 | 3 | 1.07 | 0.03186 | galm;pgm1;pgm5                  |
| GO:0071376 | cellular response to corticotropin-releasing hormone stimulus                                                                                       | 5 | 3 | 0.89 | 0.04274 | crhr1;nr4a1;nr4a3               |
| GO:0042264 | peptidyl-aspartic acid hydroxylation                                                                                                                | 5 | 3 | 0.89 | 0.04274 | asph;asphd1;asphd2              |
| GO:0010998 | regulation of translational initiation by eIF2 alpha phosphorylation                                                                                | 5 | 3 | 0.89 | 0.04274 | eif2ak1;eif2ak2;pkz             |
| GO:2000463 | positive regulation of excitatory postsynaptic potential                                                                                            | 5 | 3 | 0.89 | 0.04274 | shank1;shank2;si:ch1073-450f2.1 |
| GO:0097107 | postsynaptic density assembly                                                                                                                       | 5 | 3 | 0.89 | 0.04274 | shank1;shank2;si:ch1073-450f2.1 |
| GO:0097264 | self proteolysis                                                                                                                                    | 5 | 3 | 0.89 | 0.04274 | TENM2;tenm3;tenm4               |
| GO:1904825 | protein localization to microtubule plus-end                                                                                                        | 5 | 3 | 0.89 | 0.04274 | mapre1b;mapre2;mapre3b          |
| GO:0045634 | regulation of melanocyte differentiation                                                                                                            | 2 | 2 | 0.36 | 0.03187 | ctbp2a;hipk2                    |
| GO:0051012 | microtubule sliding                                                                                                                                 | 2 | 2 | 0.36 | 0.03187 | pafah1b1a;pafah1b1b             |
| GO:0045905 | positive regulation of translational termination                                                                                                    | 2 | 2 | 0.36 | 0.03187 | eif5a;eif5a2                    |
| GO:0048025 | negative regulation of mRNA splicing, via spliceosome                                                                                               | 2 | 2 | 0.36 | 0.03187 | rbmx;ybx1                       |
| GO:0038026 | reelin-mediated signaling pathway                                                                                                                   | 2 | 2 | 0.36 | 0.03187 | dab2ipa;dab2ipb                 |
| GO:1904059 | regulation of locomotor rhythm                                                                                                                      | 2 | 2 | 0.36 | 0.03187 | nr1d1;scn1lab                   |
| GO:0044210 | 'de novo' CTP biosynthetic process                                                                                                                  | 2 | 2 | 0.36 | 0.03187 | ctps1a;ctps1b                   |
| GO:0036071 | N-glycan fucosylation                                                                                                                               | 2 | 2 | 0.36 | 0.03187 | fut8a;fut8b                     |
| GO:0002154 | thyroid hormone mediated signaling pathway                                                                                                          | 2 | 2 | 0.36 | 0.03187 | thraa;thrb                      |
| GO:0035024 | negative regulation of Rho protein signal transduction                                                                                              | 2 | 2 | 0.36 | 0.03187 | akap12b;kctd13                  |
| GO:0030948 | negative regulation of vascular endothelial growth factor receptor signaling pathway                                                                | 2 | 2 | 0.36 | 0.03187 | dab2ipa;dab2ipb                 |
| GO:0008295 | spermidine biosynthetic process                                                                                                                     | 2 | 2 | 0.36 | 0.03187 | amd1;srm                        |
| GO:0001778 | plasma membrane repair                                                                                                                              | 2 | 2 | 0.36 | 0.03187 | anxa6;dysf                      |
| GO:0006452 | translational frameshifting                                                                                                                         | 2 | 2 | 0.36 | 0.03187 | eif5a;eif5a2                    |
| GO:0033578 | protein glycosylation in Golgi                                                                                                                      | 2 | 2 | 0.36 | 0.03187 | fut8a;fut8b                     |
| GO:0021766 | hippocampus development                                                                                                                             | 2 | 2 | 0.36 | 0.03187 | enpp1;pebp1                     |
| GO:0048240 | sperm capacitation                                                                                                                                  | 2 | 2 | 0.36 | 0.03187 | abhd2a;pebp1                    |
| GO:0009098 | leucine biosynthetic process                                                                                                                        | 2 | 2 | 0.36 | 0.03187 | bcat1;bcat2                     |
| GO:0009099 | valine biosynthetic process                                                                                                                         | 2 | 2 | 0.36 | 0.03187 | bcat1;bcat2                     |
| GO:0051969 | regulation of transmission of nerve impulse                                                                                                         | 2 | 2 | 0.36 | 0.03187 | kcnab1a;kcnab2b                 |
| GO:0009449 | gamma-aminobutyric acid biosynthetic process                                                                                                        | 2 | 2 | 0.36 | 0.03187 | gad1b;gad2                      |
| GO:0006696 | ergosterol biosynthetic process                                                                                                                     | 2 | 2 | 0.36 | 0.03187 | acat2;fdft1                     |
| GO:0015820 | leucine transport                                                                                                                                   | 2 | 2 | 0.36 | 0.03187 | slc6a15;slc6a17                 |
| GO:0000461 | endonucleolytic cleavage to generate mature 3'-end of SSU-rRNA from (SSU-rRNA, 5.8S rRNA, LSU-rRNA)                                                 | 2 | 2 | 0.36 | 0.03187 | rps21;rpsa                      |
| GO:0035553 | oxidative single-stranded RNA demethylation                                                                                                         | 2 | 2 | 0.36 | 0.03187 | alkbh5;fto                      |
| GO:0060290 | transdifferentiation                                                                                                                                | 2 | 2 | 0.36 | 0.03187 | insm1a;insm1b                   |

**Table S10. RNA sample quality control.**

| Sample Name | Nanodrop |         |                       |                 |                    | Bioanalyzer |           |         |                    |                             |                           | Qubit       |                |
|-------------|----------|---------|-----------------------|-----------------|--------------------|-------------|-----------|---------|--------------------|-----------------------------|---------------------------|-------------|----------------|
|             | 260/280  | 260/230 | Nanodrop Conc (ng/ul) | Dilution factor | Nano final (ng/ul) | RIN         | From (bp) | To (bp) | Total average size | size distribution in CV (%) | Bioanalyzer Conc. (ng/ul) | Qubit ng/ul | Total Qubit ug |
| 0RNA 1      | 2.18     | 0.42    | 2.6                   | 20              | 52                 | 8.7         | 179       | 1328    | 382                | 35.6                        | 14.952                    | 52.2        | 1.044          |
| 0RNA 2      | 2.39     | 1.15    | 2.5                   | 20              | 50                 | 8.6         | 156       | 1351    | 372                | 33.7                        | 38.755                    | 61          | 1.22           |
| 0RNA 3      | 1.65     | 0.8     | 2.8                   | 20              | 56                 | 8.6         | 149       | 1358    | 360                | 29.5                        | 23.6                      | 53.2        | 1.064          |
| 2RNA 1      | 1.65     | 1.68    | 4                     | 20              | 80                 | 8.6         | 182       | 1345    | 373                | 33.6                        | 56.448                    | 96.6        | 1.932          |
| 2RNA 2      | 1.72     | 0.49    | 6.5                   | 10              | 65                 | 7.8         | 171       | 1354    | 388                | 37.9                        | 18.571                    | 48.6        | 0.972          |
| 2RNA 3      | 2.11     | 2.01    | 1.96                  | 20              | 39.2               | 8.6         | 174       | 1328    | 363                | 30.9                        | 62.109                    | 49.6        | 0.992          |
| 4RNA 1      | 1.76     | 0.35    | 3.8                   | 20              | 76                 | 8.2         | 171       | 1321    | 380                | 38.5                        | 13.475                    | 79          | 1.58           |
| 4RNA 2      | 2.1      | 2.11    | 2.12                  | 20              | 42.4               | 8.5         | 170       | 1353    | 385                | 38.9                        | 82.079                    | 60.2        | 1.204          |
| 4RNA 3      | 1.88     | 1.03    | 3.33                  | 20              | 66.6               | 7.7         | 180       | 1323    | 410                | 40.3                        | 41.509                    | 45.6        | 0.912          |
| 7RNA 1      | 1.93     | 0.38    | 48.9                  | 20              | 48.9               | 7.8         | 141       | 1331    | 404                | 42.2                        | 16.036                    | 62.2        | 1.244          |
| 7RNA 2      | 1.9      | 0.73    | 58.3                  | 20              | 58.3               | 8.3         | 183       | 1366    | 413                | 40.5                        | 29.565                    | 57.8        | 1.156          |
| 7RNA 3      | 1.99     | 0.36    | 57.3                  | 20              | 57.3               | 8.6         | 183       | 1341    | 398                | 39.2                        | 14.112                    | 53.2        | 1.064          |
| 12RNA 1     | 1.77     | 0.15    | 4.9                   | 10              | 49                 | 8.6         | 186       | 1340    | 382                | 37                          | 5.55                      | 45          | 0.99           |
| 12RNA 2     | 1.91     | 0.68    | 49.9                  | 20              | 49.9               | 8           | 173       | 1337    | 387                | 38                          | 25.84                     | 51.4        | 1.028          |
| 12RNA 3     | 2.18     | 1.7     | 5.72                  | 10              | 57.2               | 8.7         | 187       | 1335    | 400                | 37.6                        | 63.92                     | 67.2        | 1.344          |



**Table S11. ATAC-seq library sample quality control.**

| Sample Name | Nanodrop |         |                       | Bioanalyzer      |                   |              |                          | Qubit       |                |
|-------------|----------|---------|-----------------------|------------------|-------------------|--------------|--------------------------|-------------|----------------|
|             | 260/280  | 260/230 | Nanodrop Conc (ng/ul) | Bio Avg fragment | Molarity (nmol/L) | Average size | Bionalyzer Conc. (ng/ul) | Qubit ng/ul | Total Qubit ug |
| 0dpiATAC_1  | 2.05     | 1.86    | 30.3                  | 384              | 48.4              | 338          | 4.327                    | 16.8        | 252            |
| 0dpiATAC_2  | 2.08     | 0.8     | 23.7                  | 503              | 20.2              | 536          | 6.111                    | 10.5        | 157.5          |
| 0dpiATAC_3  | 1.89     | 1.75    | 61.2                  | 396              | 49.4              | 301          | 32.282                   | 27          | 405            |
| 2dpiATAC_1  | 1.86     | 1.45    | 75.6                  | 359              | 69.5              | 351          | 5.156                    | 25.4        | 381            |
| 2dpiATAC_2  | 1.93     | 1.38    | 45.7                  | 513              | 10.2              | 587          | 3.37                     | 10.4        | 156            |
| 2dpiATAC_3  | 2.11     | 2.01    | 39.2                  | 352              | 56.4              | 339          | 9.158                    | 18          | 270            |
| 4dpiATAC_1  | 1.81     | 0.61    | 50.71                 | 403              | 18.6              | 361          | 7.845                    | 11.3        | 169.5          |
| 4dpiATAC_2  | 2.12     | 0.56    | 48.12                 | 397              | 27.3              | 363          | 61.829                   | 6.62        | 99.3           |
| 4dpiATAC_3  | 1.86     | 1.74    | 37.9                  | 365              | 53.7              | 286          | 5.698                    | 23.2        | 348            |
| 7dpiATAC_2  | 1.9      | 0.73    | 58.3                  | 492              | 17.3              | 573          | 6.33                     | 11.3        | 169.5          |
| 7dpiATAC_3  | 1.91     | 2.06    | 39.6                  | 367              | 48.1              | 307          | 4.975                    | 16.9        | 253.5          |
| 12dpiATAC_1 | 2.02     | 1.82    | 21.5                  | 467              | 33.7              | 485          | 30.625                   | 17.2        | 258            |
| 12dpiATAC_2 | 1.92     | 0.7     | 56.44                 | 363              | 63.9              | 350          | 6.925                    | 28          | 420            |
| 12dpiATAC_3 | 2.12     | 0.66    | 56.5                  | 364              | 85.4              | 326          | 6.165                    | 26          | 390            |

**Table S12. PCR primers for ATAC-seq libraries based on Nextera indices .**

| Sample Name | Primer Sequences                                       | Index           |
|-------------|--------------------------------------------------------|-----------------|
| 0dpiATAC_1  | CAAGCAGAAGACGGCATAACGAGATTCGCCTTAGTCTCGTGGGCTCGGAGATGT | Ad2.1_TAAGGCGA  |
| 0dpiATAC_2  | CAAGCAGAAGACGGCATAACGAGATTTCTGCCTGTCTCGTGGGCTCGGAGATGT | Ad2.3_AGGCAGAA  |
| 0dpiATAC_3  | CAAGCAGAAGACGGCATAACGAGATGTAGAGAGGTCTCGTGGGCTCGGAGATGT | Ad2.7_CTCTCTAC  |
| 2dpiATAC_1  | CAAGCAGAAGACGGCATAACGAGATCAGCCTCGGTCTCGTGGGCTCGGAGATGT | Ad2.10_CGAGGCTG |
| 2dpiATAC_2  | CAAGCAGAAGACGGCATAACGAGATTGCCTCTTGTCTCGTGGGCTCGGAGATGT | Ad2.11_AAGAGGCA |
| 2dpiATAC_3  | CAAGCAGAAGACGGCATAACGAGATTCCTCTACGTCTCGTGGGCTCGGAGATGT | Ad2.12_GTAGAGGA |
| 4dpiATAC_1  | CAAGCAGAAGACGGCATAACGAGATGCTCAGGAGTCTCGTGGGCTCGGAGATGT | Ad2.4_TCCTGAGC  |
| 4dpiATAC_2  | CAAGCAGAAGACGGCATAACGAGATAGGAGTCCGTCTCGTGGGCTCGGAGATGT | Ad2.5_GGACTCCT  |
| 4dpiATAC_3  | CAAGCAGAAGACGGCATAACGAGATCATGCCTAGTCTCGTGGGCTCGGAGATGT | Ad2.6_TAGGCATG  |
| 7dpiATAC_2  | CAAGCAGAAGACGGCATAACGAGATCCTCTCTGGTCTCGTGGGCTCGGAGATGT | Ad2.8_CAGAGAGG  |
| 7dpiATAC_3  | CAAGCAGAAGACGGCATAACGAGATAGCGTAGCGTCTCGTGGGCTCGGAGATGT | Ad2.9_GCTACGCT  |
| 12dpiATAC_1 | CAAGCAGAAGACGGCATAACGAGATATCACGACGTCTCGTGGGCTCGGAGATGT | Ad2.13_GTCGTGAT |
| 12dpiATAC_2 | CAAGCAGAAGACGGCATAACGAGATACAGTGGTGTCTCGTGGGCTCGGAGATGT | Ad2.14_ACCACTGT |
| 12dpiATAC_3 | CAAGCAGAAGACGGCATAACGAGATCAGATCCAGTCTCGTGGGCTCGGAGATGT | Ad2.15_TGGATCTG |
